# Supplementary material for: Interaction Wave Functions and Interaction-Based Coherence and Entanglement in Complex Adaptive Systems
Source: Research Square preprint supplement (doi:10.21203/rs.3.rs-6846233/v1), 2025-06-16
Supplement: Supplementary file 1 [file 20030602-06.xls]

## Sheet: Sheet1
0.25		66				66	16.5	0.000123096
0.24		462				462	110.88	0.00086167
0.23		2458			90	2548	586.04	0.00475224
0.22		908	119	699	223	1949	428.78	0.00363505
0.21	46	758	2232	722	218	3976	834.96	0.00741559
0.2	93	3828	7947	564	795	13227	2645.4	0.0246695
0.19	770	866	2852	2623	806	7917	1504.23	0.0147659
0.18	789	2854	5148	124	476	9391	1690.38	0.017515
0.17	2504	2545	4898	2349	440	12736	2165.12	0.0237537
0.16	2611	2786	3802	1500	443	11142	1782.72	0.0207808
0.15	872	3193	3714	996	1253	10028	1504.2	0.0187031
0.14	3894	316	2451	4053	2138	12852	1799.28	0.0239701
0.13	439	1559	2009	531	1285	5823	756.99	0.0108604
0.12	478	113	3208	606	1226	5631	675.72	0.0105023
0.11	645	953	1564	1058	868	5088	559.68	0.00948956
0.1	561	8121	3450	1469	3882	17483	1748.3	0.0326073
0.09	2142	1165	237	2142	1400	7086	637.74	0.013216
0.08	1204	2999	590	3480	3491	11764	941.12	0.0219409
0.07	899	1526	1590	3064	1350	8429	590.03	0.0157208
0.06	860	738	727	2101	1408	5834	350.04	0.0108809
0.05	1965	3980	2164	1411	5601	15121	756.05	0.028202
0.04	5510	1876	2891	2408	3527	16212	648.48	0.0302368
0.03	3121	2844	600	958	8424	15947	478.41	0.0297425
0.02	4196	684	1099	2431	3789	12199	243.98	0.0227522
0.01	2442	2624	194	1550	3140	9950	99.5	0.0185576
-8.67362e-17	1691	6640	6067	2253	5688	22339	-1.9376e-12	0.0416642
-0.01	3947	487	1662	5192	7521	18809	-188.09	0.0350804
-0.02	2354	1132	6995	2352	5872	18705	-374.1	0.0348865
-0.03	5708	645	3367	1364	4581	15665	-469.95	0.0292166
-0.04	3884	717	6270	3175	4805	18851	-754.04	0.0351588
-0.05	5678	3044	4040	1466	26861	41089	-2054.45	0.0766346
-0.06	9020	607	3813	3371	4401	21212	-1272.72	0.0395622
-0.07	5510	429	992	658	7123	14712	-1029.84	0.0274392
-0.08	4247	1280	4061	1364	1646	12598	-1007.84	0.0234964
-0.09	3254	1161	1790	2155	96	8456	-761.04	0.0157712
-0.1	4325	17428	3470	168		25391	-2539.1	0.0473564
-0.11	3238	7984	3044	18307		32573	-3583.03	0.0607515
-0.12	716	7544	4374	6632		19266	-2311.92	0.0359328
-0.13		5840	2707	1669		10216	-1328.08	0.0190537
-0.14		1541	1876	178		3595	-503.3	0.00670499
-0.15		4132	2975			7107	-1066.05	0.0132552
-0.16		0	6487			6487	-1037.92	0.0120988
-0.17		0	3515			3515	-597.55	0.00655578
-0.18		0	2926			2926	-526.68	0.00545724
-0.19		0	4620			4620	-877.8	0.0086167
-0.2		1835	3340			5175	-1035	0.00965183
						536168	0.000440216
