# Supplementary material for: Interaction Wave Functions and Interaction-Based Coherence and Entanglement in Complex Adaptive Systems
Source: Research Square preprint supplement (doi:10.21203/rs.3.rs-6846233/v1), 2025-06-16
Supplement: Supplementary file 2 [file 20030602.xls]

## Sheet: Sheet1
13.47	46	619.62	0.000513318		0.21
13.46	93	1251.78	0.0010378		0.2
13.45	770	10356.5	0.0085925		0.19
13.44	789	10604.2	0.00880453		0.18
13.43	2504	33628.7	0.0279424		0.17
13.42	2611	35039.6	0.0291364		0.16
13.41	872	11693.5	0.00973073		0.15
13.4	3894	52179.6	0.0434535		0.14
13.39	439	5878.21	0.00489884		0.13
13.38	478	6395.64	0.00533405		0.12
13.37	645	8623.65	0.00719762		0.11
13.36	561	7494.96	0.00626025		0.1
13.35	2142	28595.7	0.0239028		0.09
13.34	1204	16061.4	0.0134356		0.08
13.33	899	11983.7	0.010032		0.07
13.32	860	11455.2	0.00959682		0.06
13.31	1965	26154.2	0.0219276		0.05
13.3	5510	73283	0.0614866		0.04
13.29	3121	41478.1	0.0348275		0.03
13.28	4196	55722.9	0.0468236		0.02
13.27	2442	32405.3	0.0272505		0.01
13.26	1691	22422.7	0.01887		0
13.25	3947	52297.8	0.0440449		-0.01
13.24	2354	31167	0.0262685		-0.02
13.23	5708	75516.8	0.0636961		-0.03
13.22	3884	51346.5	0.0433419		-0.04
13.21	5678	75006.4	0.0633613		-0.05
13.2	9020	119064	0.100655		-0.06
13.19	5510	72676.9	0.0614866		-0.07
13.18	4247	55975.5	0.0473927		-0.08
13.17	3254	42855.2	0.0363117		-0.09
13.16	4325	56917	0.0482631		-0.1
13.15	3238	42579.7	0.0361332		-0.11
13.14	716	9408.24	0.00798991		-0.12
	89613	13.2586
