# Supplementary material for: Interaction Wave Functions and Interaction-Based Coherence and Entanglement in Complex Adaptive Systems
Source: Research Square preprint supplement (doi:10.21203/rs.3.rs-6846233/v1), 2025-06-16
Supplement: Supplementary file 3 [file 20030603.xls]

## Sheet: Sheet1
13.55	66	894.3	0.000585792		0.25
13.54	462	6255.48	0.00410054		0.24
13.53	2458	33256.7	0.0218163		0.23
13.52	908	12276.2	0.00805908		0.22
13.51	758	10240.6	0.00672773		0.21
13.5	3828	51678	0.0339759		0.2
13.49	866	11682.3	0.0076863		0.19
13.48	2854	38471.9	0.0253311		0.18
13.47	2545	34281.2	0.0225885		0.17
13.46	2786	37499.6	0.0247275		0.16
13.45	3193	42945.9	0.0283399		0.15
13.44	316	4247.04	0.0028047		0.14
13.43	1559	20937.4	0.0138371		0.13
13.42	113	1516.46	0.00100295		0.12
13.41	953	12779.7	0.00845848		0.11
13.4	8121	108821	0.072079		0.1
13.39	1165	15599.4	0.0103401		0.09
13.38	2999	40126.6	0.026618		0.08
13.37	1526	20402.6	0.0135442		0.07
13.36	738	9859.68	0.00655022		0.06
13.35	3980	53133	0.035325		0.05
13.34	1876	25025.8	0.0166507		0.04
13.33	2844	37910.5	0.0252423		0.03
13.32	684	9110.88	0.00607093		0.02
13.31	2624	34925.4	0.0232897		0.01
13.3	6640	88312	0.0589342		0
13.29	487	6472.23	0.00432243		-0.01
13.28	1132	15033	0.0100472		-0.02
13.27	645	8559.15	0.00572478		-0.03
13.26	717	9507.42	0.00636383		-0.04
13.25	3044	40333	0.0270174		-0.05
13.24	607	8036.68	0.00538751		-0.06
13.23	429	5675.67	0.00380765		-0.07
13.22	1280	16921.6	0.0113608		-0.08
13.21	1161	15336.8	0.0103046		-0.09
13.2	17428	230050	0.154685		-0.1
13.19	7984	105309	0.0708631		-0.11
13.18	7544	99429.9	0.0669578		-0.12
13.17	5840	76912.8	0.0518337		-0.13
13.16	1541	20279.6	0.0136774		-0.14
13.15	4132	54335.8	0.0366741		-0.15
13.14	0	0	0		-0.16
13.13	0	0	0		-0.17
13.12	0	0	0		-0.18
13.11	0	0	0		-0.19
13.1	1835	24038.5	0.0162868		-0.2
	112668	13.2994
