# Supplementary material for: Interaction Wave Functions and Interaction-Based Coherence and Entanglement in Complex Adaptive Systems
Source: Research Square preprint supplement (doi:10.21203/rs.3.rs-6846233/v1), 2025-06-16
Supplement: Supplementary file 4 [file 20030604.xls]

## Sheet: Sheet1
13.42	119	1596.98	0.000902356		0.22
13.41	2232	29931.1	0.0169249		0.21
13.4	7947	106490	0.0602607		0.2
13.39	2852	38188.3	0.0216262		0.19
13.38	5148	68880.2	0.0390364		0.18
13.37	4898	65486.3	0.0371407		0.17
13.36	3802	50794.7	0.0288299		0.16
13.35	3714	49581.9	0.0281626		0.15
13.34	2451	32696.3	0.0185855		0.14
13.33	2009	26780	0.0152339		0.13
13.32	3208	42730.6	0.0243257		0.12
13.31	1564	20816.8	0.0118595		0.11
13.3	3450	45885	0.0261607		0.1
13.29	237	3149.73	0.00179713		0.09
13.28	590	7835.2	0.00447387		0.08
13.27	1590	21099.3	0.0120567		0.07
13.26	727	9640.02	0.00551271		0.06
13.25	2164	28673	0.0164092		0.05
13.24	2891	38276.8	0.0219219		0.04
13.23	600	7938	0.00454969		0.03
13.22	1099	14528.8	0.00833352		0.02
13.21	194	2562.74	0.00147107		0.01
13.2	6067	80084.4	0.046005		0
13.19	1662	21921.8	0.0126027		-0.01
13.18	6995	92194.1	0.0530418		-0.02
13.17	3367	44343.4	0.0255314		-0.03
13.16	6270	82513.2	0.0475443		-0.04
13.15	4040	53126	0.0306346		-0.05
13.14	3813	50102.8	0.0289133		-0.06
13.13	992	13025	0.00752216		-0.07
13.12	4061	53280.3	0.0307938		-0.08
13.11	1790	23466.9	0.0135733		-0.09
13.1	3470	45457	0.0263124		-0.1
13.09	3044	39846	0.0230821		-0.11
13.08	4374	57211.9	0.0331673		-0.12
13.07	2707	35380.5	0.0205267		-0.13
13.06	1876	24500.6	0.0142254		-0.14
13.05	2975	38823.8	0.0225589		-0.15
13.04	6487	84590.5	0.0491898		-0.16
13.03	3515	45800.5	0.0266536		-0.17
13.02	2926	38096.5	0.0221873		-0.18
13.01	4620	60106.2	0.0350326		-0.19
13	3340	43420	0.0253266		-0.2
	131877	13.2006
