# Supplementary material for: Interaction Wave Functions and Interaction-Based Coherence and Entanglement in Complex Adaptive Systems
Source: Research Square preprint supplement (doi:10.21203/rs.3.rs-6846233/v1), 2025-06-16
Supplement: Supplementary file 5 [file 20030605.xls]

## Sheet: Sheet1
13.53	699	9457.47	0.0080213		0.22
13.52	722	9761.44	0.00828523		0.21
13.51	564	7619.64	0.00647212		0.2
13.5	2623	35410.5	0.0301		0.19
13.49	124	1672.76	0.00142295		0.18
13.48	2349	31664.5	0.0269557		0.17
13.47	1500	20205	0.0172131		0.16
13.46	996	13406.2	0.0114295		0.15
13.45	4053	54512.9	0.0465098		0.14
13.44	531	7136.64	0.00609343		0.13
13.43	606	8138.58	0.00695409		0.12
13.42	1058	14198.4	0.012141		0.11
13.41	1469	19699.3	0.0168573		0.1
13.4	2142	28702.8	0.0245803		0.09
13.39	3480	46597.2	0.0399344		0.08
13.38	3064	40996.3	0.0351606		0.07
13.37	2101	28090.4	0.0241098		0.06
13.36	1411	18851	0.0161918		0.05
13.35	2408	32146.8	0.0276327		0.04
13.34	958	12779.7	0.0109934		0.03
13.33	2431	32405.2	0.0278967		0.02
13.32	1550	20646	0.0177869		0.01
13.31	2253	29987.4	0.0258541		0
13.3	5192	69053.6	0.0595802		-0.01
13.29	2352	31258.1	0.0269901		-0.02
13.28	1364	18113.9	0.0156524		-0.03
13.27	3175	42132.3	0.0364344		-0.04
13.26	1466	19439.2	0.0168229		-0.05
13.25	3371	44665.8	0.0386835		-0.06
13.24	658	8711.92	0.00755081		-0.07
13.23	1364	18045.7	0.0156524		-0.08
13.22	2155	28489.1	0.0247295		-0.09
13.21	168	2219.28	0.00192787		-0.1
13.2	18307	241652	0.21008		-0.11
13.19	6632	87476.1	0.0761048		-0.12
13.18	1669	21997.4	0.0191524		-0.13
13.17	178	2344.26	0.00204262		-0.14
	87143	13.3078
