# Supplementary material for: Interaction Wave Functions and Interaction-Based Coherence and Entanglement in Complex Adaptive Systems
Source: Research Square preprint supplement (doi:10.21203/rs.3.rs-6846233/v1), 2025-06-16
Supplement: Supplementary file 6 [file 20030606.xls]

## Sheet: Sheet1
13.28	90	1195.2	0.000783515		0.23
13.27	223	2959.21	0.00194138		0.22
13.26	218	2890.68	0.00189785		0.21
13.25	795	10533.8	0.00692105		0.2
13.24	806	10671.4	0.00701681		0.19
13.23	476	6297.48	0.00414392		0.18
13.22	440	5816.8	0.00383052		0.17
13.21	443	5852.03	0.00385663		0.16
13.2	1253	16539.6	0.0109083		0.15
13.19	2138	28200.2	0.0186128		0.14
13.18	1285	16936.3	0.0111869		0.13
13.17	1226	16146.4	0.0106732		0.12
13.16	868	11422.9	0.00755657		0.11
13.15	3882	51048.3	0.0337956		0.1
13.14	1400	18396	0.012188		0.09
13.13	3491	45836.8	0.0303917		0.08
13.12	1350	17712	0.0117527		0.07
13.11	1408	18458.9	0.0122577		0.06
13.1	5601	73373.1	0.0487607		0.05
13.09	3527	46168.4	0.0307051		0.04
13.08	8424	110186	0.073337		0.03
13.07	3789	49522.2	0.032986		0.02
13.06	3140	41008.4	0.027336		0.01
13.05	5688	74228.4	0.0495181		0
13.04	7521	98073.8	0.0654757		-0.01
13.03	5872	76512.2	0.05112		-0.02
13.02	4581	59644.6	0.0398809		-0.03
13.01	4805	62513.1	0.041831		-0.04
13	26861	349193	0.233844		-0.05
12.99	4401	57169	0.0383139		-0.06
12.98	7123	92456.5	0.0620108		-0.07
12.97	1646	21348.6	0.0143296		-0.08
12.96	96	1244.16	0.000835749		-0.09
	114867	13.0547
