# Supplementary material for: Interaction Wave Functions and Interaction-Based Coherence and Entanglement in Complex Adaptive Systems
Source: Research Square preprint supplement (doi:10.21203/rs.3.rs-6846233/v1), 2025-06-16
Supplement: Supplementary file 7 [file 20030609-13.xls]

## Sheet: Sheet1
0.22	129					129	28.38	0.000259034
0.21	459			503		962	202.02	0.00193171
0.2	1475			25		1500	300	0.00301202
0.19	1062	104		333		1499	284.81	0.00301001
0.18	428	564		157		1149	206.82	0.00230721
0.17	1066	178		108		1352	229.84	0.00271483
0.16	224	2312		26		2562	409.92	0.00514453
0.15	360	810		164		1334	200.1	0.00267869
0.14	787	2320		0		3107	434.98	0.00623889
0.13	520	901	477	707	915	3520	457.6	0.0070682
0.12	8237	1952	880	455	338	11862	1423.44	0.023819
0.11	568	437	4434	3510	4693	13642	1500.62	0.0273933
0.1	6630	403	397	1047	1002	9479	947.9	0.0190339
0.09	2273	7068	4758	3961	1661	19721	1774.89	0.0396
0.08	2634	2991	1714	1391	7598	16328	1306.24	0.0327868
0.07	9377	4598	1530	773	15788	32066	2244.62	0.0643889
0.06	4393	2972	9871	874	22166	40276	2416.56	0.0808747
0.05	2396	1776	2409	470	0	7051	352.55	0.0141585
0.04	4425	13439	1913	1001	203	20981	839.24	0.0421301
0.03	3825	4882	2162	2187	90	13146	394.38	0.0263973
0.02	15196	5626	3016	792	8	24638	492.76	0.0494734
0.01	3091	4696	17061	4293	9734	38875	388.75	0.0780615
-5.89806e-17	3652	5230	8645	841	690	19058	-1.12405e-12	0.0382687
-0.01	1986	6976	6713	1608	76	17359	-173.59	0.0348571
-0.02	1688	1363	4284	3688	68	11091	-221.82	0.0222709
-0.03	2939	2184	2072	4784	280	12259	-367.77	0.0246162
-0.04	49	847	7808	6998	1605	17307	-692.28	0.0347527
-0.05	85	1081	1875	1825	721	5587	-279.35	0.0112188
-0.06	3844	20444	1761	1912	1424	29385	-1763.1	0.0590054
-0.07	1394	10087	670	2533	4593	19277	-1349.39	0.0387084
-0.08	6997	4438	1185	146	2514	15280	-1222.4	0.0306824
-0.09	1096	3298	3483	6376	1648	15901	-1431.09	0.0319294
-0.1	3855	658	1656	1932	1272	9373	-937.3	0.0188211
-0.11	331	3040	3460	575	1751	9157	-1007.27	0.0183874
-0.12	1350	86	999	0	1916	4351	-522.12	0.00873686
-0.13	262	661	1294	166	4009	6392	-830.96	0.0128352
-0.14	1083	200	2398		7899	11580	-1621.2	0.0232528
-0.15	87	723	1312		1447	3569	-535.35	0.00716659
-0.16	3895		931		2992	7818	-1250.88	0.0156986
-0.17	2898		338		1558	4794	-814.98	0.00962641
-0.18	6002				50	6052	-1089.36	0.0121525
-0.19	181				1555	1736	-329.84	0.00348591
-0.2	5054					5054	-1010.8	0.0101485
-0.21	0					0	0	0
-0.22	0					0	0	0
-0.23	446					446	-102.58	0.000895573
						498005	-0.00143976
