# Supplementary material for: Interaction Wave Functions and Interaction-Based Coherence and Entanglement in Complex Adaptive Systems
Source: Research Square preprint supplement (doi:10.21203/rs.3.rs-6846233/v1), 2025-06-16
Supplement: Supplementary file 8 [file 20030609.xls]

## Sheet: Sheet1
13	129	1677	0.00108651		0.22
12.99	459	5962.41	0.00386595		0.21
12.98	1475	19145.5	0.0124232		0.2
12.97	1062	13774.1	0.00894474		0.19
12.96	428	5546.88	0.00360485		0.18
12.95	1066	13804.7	0.00897843		0.17
12.94	224	2898.56	0.00188665		0.16
12.93	360	4654.8	0.00303212		0.15
12.92	787	10168	0.00662854		0.14
12.91	520	6713.2	0.00437972		0.13
12.9	8237	106257	0.0693765		0.12
12.89	568	7321.52	0.004784		0.11
12.88	6630	85394.4	0.0558415		0.1
12.87	2273	29253.5	0.0191444		0.09
12.86	2634	33873.2	0.022185		0.08
12.85	9377	120494	0.0789782		0.07
12.84	4393	56406.1	0.0370002		0.06
12.83	2396	30740.7	0.0201804		0.05
12.82	4425	56728.5	0.0372697		0.04
12.81	3825	48998.3	0.0322162		0.03
12.8	15196	194509	0.127989		0.02
12.79	3091	39533.9	0.0260341		0.01
12.78	3652	46672.6	0.0307591		0
12.77	1986	25361.2	0.0167272		-0.01
12.76	1688	21538.9	0.0142173		-0.02
12.75	2939	37472.3	0.0247539		-0.03
12.74	49	624.26	0.000412705		-0.04
12.73	85	1082.05	0.000715916		-0.05
12.72	3844	48895.7	0.0323763		-0.06
12.71	1394	17717.7	0.011741		-0.07
12.7	6997	88861.9	0.0589325		-0.08
12.69	1096	13908.2	0.00923111		-0.09
12.68	3855	48881.4	0.0324689		-0.1
12.67	331	4193.77	0.00278786		-0.11
12.66	1350	17091	0.0113704		-0.12
12.65	262	3314.3	0.00220671		-0.13
12.64	1083	13689.1	0.00912161		-0.14
12.63	87	1098.81	0.000732761		-0.15
12.62	3895	49154.9	0.0328058		-0.16
12.61	2898	36543.8	0.0244085		-0.17
12.6	6002	75625.2	0.0505521		-0.18
12.59	181	2278.79	0.00152448		-0.19
12.58	5054	63579.3	0.0425675		-0.2
12.57	0	0	0		-0.21
12.56	0	0	0		-0.22
12.55	446	5597.3	0.00375645		-0.23
	118729	12.7773
