# Supplementary material for: Interaction Wave Functions and Interaction-Based Coherence and Entanglement in Complex Adaptive Systems
Source: Research Square preprint supplement (doi:10.21203/rs.3.rs-6846233/v1), 2025-06-16
Supplement: Supplementary file 9 [file 20030610.xls]

## Sheet: Sheet1
12.85	104	1336.4	0.000871423		0.19
12.84	564	7241.76	0.00472579		0.18
12.83	178	2283.74	0.00149147		0.17
12.82	2312	29639.8	0.0193724		0.16
12.81	810	10376.1	0.00678705		0.15
12.8	2320	29696	0.0194394		0.14
12.79	901	11523.8	0.00754954		0.13
12.78	1952	24946.6	0.0163559		0.12
12.77	437	5580.49	0.00366165		0.11
12.76	403	5142.28	0.00337676		0.1
12.75	7068	90117	0.0592233		0.09
12.74	2991	38105.3	0.0250618		0.08
12.73	4598	58532.5	0.038527		0.07
12.72	2972	37803.8	0.0249026		0.06
12.71	1776	22573	0.0148812		0.05
12.7	13439	170675	0.112606		0.04
12.69	4882	61952.6	0.0409066		0.03
12.68	5626	71337.7	0.0471406		0.02
12.67	4696	59498.3	0.0393481		0.01
12.66	5230	66211.8	0.0438225		0
12.65	6976	88246.4	0.0584524		-0.01
12.64	1363	17228.3	0.0114207		-0.02
12.63	2184	27583.9	0.0182999		-0.03
12.62	847	10689.1	0.00709707		-0.04
12.61	1081	13631.4	0.00905777		-0.05
12.6	20444	257594	0.171302		-0.06
12.59	10087	126995	0.0845197		-0.07
12.58	4438	55830	0.0371863		-0.08
12.57	3298	41455.9	0.0276342		-0.09
12.56	658	8264.48	0.00551343		-0.1
12.55	3040	38152	0.0254724		-0.11
12.54	86	1078.44	0.0007206		-0.12
12.53	661	8282.33	0.00553856		-0.13
12.52	200	2504	0.00167581		-0.14
12.51	723	9044.73	0.00605807		-0.15
	119345	12.6621
