# Supplementary material for: Interaction Wave Functions and Interaction-Based Coherence and Entanglement in Complex Adaptive Systems
Source: Research Square preprint supplement (doi:10.21203/rs.3.rs-6846233/v1), 2025-06-16
Supplement: Supplementary file 10 [file 20030611.xls]

## Sheet: Sheet1
12.92	477	6162.84	0.00469923		0.13
12.91	880	11360.8	0.00866944		0.12
12.9	4434	57198.6	0.0436821		0.11
12.89	397	5117.33	0.0039111		0.1
12.88	4758	61283	0.0468741		0.09
12.87	1714	22059.2	0.0168857		0.08
12.86	1530	19675.8	0.015073		0.07
12.85	9871	126842	0.0972455		0.06
12.84	2409	30931.6	0.0237326		0.05
12.83	1913	24543.8	0.0188462		0.04
12.82	2162	27716.8	0.0212992		0.03
12.81	3016	38635	0.0297125		0.02
12.8	17061	218381	0.168079		0.01
12.79	8645	110570	0.0851674		0
12.78	6713	85792.1	0.066134		-0.01
12.77	4284	54706.7	0.0422044		-0.02
12.76	2072	26438.7	0.0204126		-0.03
12.75	7808	99552	0.0769216		-0.04
12.74	1875	23887.5	0.0184718		-0.05
12.73	1761	22417.5	0.0173487		-0.06
12.72	670	8522.4	0.0066006		-0.07
12.71	1185	15061.4	0.0116742		-0.08
12.7	3483	44234.1	0.0343132		-0.09
12.69	1656	21014.6	0.0163143		-0.1
12.68	3460	43872.8	0.0340867		-0.11
12.67	999	12657.3	0.00984178		-0.12
12.66	1294	16382	0.012748		-0.13
12.65	2398	30334.7	0.0236242		-0.14
12.64	1312	16583.7	0.0129253		-0.15
12.63	931	11758.5	0.00917187		-0.16
12.62	338	4265.56	0.00332985		-0.17
	101506	12.787
