# Supplementary material for: Interaction Wave Functions and Interaction-Based Coherence and Entanglement in Complex Adaptive Systems
Source: Research Square preprint supplement (doi:10.21203/rs.3.rs-6846233/v1), 2025-06-16
Supplement: Supplementary file 11 [file 20030612.xls]

## Sheet: Sheet1
13	503	6539	0.00895639		0.21
12.99	25	324.75	0.000445149		0.2
12.98	333	4322.34	0.00592938		0.19
12.97	157	2036.29	0.00279553		0.18
12.96	108	1399.68	0.00192304		0.17
12.95	26	336.7	0.000462955		0.16
12.94	164	2122.16	0.00292018		0.15
12.93	0	0	0		0.14
12.92	707	9134.44	0.0125888		0.13
12.91	455	5874.05	0.00810171		0.12
12.9	3510	45279	0.0624989		0.11
12.89	1047	13495.8	0.0186428		0.1
12.88	3961	51017.7	0.0705294		0.09
12.87	1391	17902.2	0.0247681		0.08
12.86	773	9940.78	0.013764		0.07
12.85	874	11230.9	0.0155624		0.06
12.84	470	6034.8	0.0083688		0.05
12.83	1001	12842.8	0.0178238		0.04
12.82	2187	28037.3	0.0389416		0.03
12.81	792	10145.5	0.0141023		0.02
12.8	4293	54950.4	0.0764409		0.01
12.79	841	10756.4	0.0149748		0
12.78	1608	20550.2	0.028632		-0.01
12.77	3688	47095.8	0.0656683		-0.02
12.76	4784	61043.8	0.0851837		-0.03
12.75	6998	89224.5	0.124606		-0.04
12.74	1825	23250.5	0.0324959		-0.05
12.73	1912	24339.8	0.034045		-0.06
12.72	2533	32219.8	0.0451025		-0.07
12.71	146	1855.66	0.00259967		-0.08
12.7	6376	80975.2	0.113531		-0.09
12.69	1932	24517.1	0.0344011		-0.1
12.68	575	7291	0.0102384		-0.11
12.67	0	0	0		-0.12
12.66	166	2101.56	0.00295579		-0.13
	56161	12.788
