# Supplementary material for: Interaction Wave Functions and Interaction-Based Coherence and Entanglement in Complex Adaptive Systems
Source: Research Square preprint supplement (doi:10.21203/rs.3.rs-6846233/v1), 2025-06-16
Supplement: Supplementary file 12 [file 20030613.xls]

## Sheet: Sheet1
12.97	915	11867.6	0.00894743		0.13
12.96	338	4380.48	0.00330517		0.12
12.95	4693	60774.4	0.045891		0.11
12.94	1002	12965.9	0.00979817		0.1
12.93	1661	21476.7	0.0162423		0.09
12.92	7598	98166.2	0.0742979		0.08
12.91	15788	203823	0.154385		0.07
12.9	22166	285941	0.216753		0.06
12.89	0	0	0		0.05
12.88	203	2614.64	0.00198506		0.04
12.87	90	1158.3	0.000880075		0.03
12.86	8	102.88	7.82289e-05		0.02
12.85	9734	125082	0.095185		0.01
12.84	690	8859.6	0.00674724		0
12.83	76	975.08	0.000743175		-0.01
12.82	68	871.76	0.000664946		-0.02
12.81	280	3586.8	0.00273801		-0.03
12.8	1605	20544	0.0156947		-0.04
12.79	721	9221.59	0.00705038		-0.05
12.78	1424	18198.7	0.0139247		-0.06
12.77	4593	58652.6	0.0449132		-0.07
12.76	2514	32078.6	0.0245834		-0.08
12.75	1648	21012	0.0161152		-0.09
12.74	1272	16205.3	0.0124384		-0.1
12.73	1751	22290.2	0.0171223		-0.11
12.72	1916	24371.5	0.0187358		-0.12
12.71	4009	50954.4	0.0392025		-0.13
12.7	7899	100317	0.0772413		-0.14
12.69	1447	18362.4	0.0141497		-0.15
12.68	2992	37938.6	0.0292576		-0.16
12.67	1558	19739.9	0.0152351		-0.17
12.66	50	633	0.000488931		-0.18
12.65	1555	19670.8	0.0152057		-0.19
	102264	12.8377
