# Supplementary material for: Interaction Wave Functions and Interaction-Based Coherence and Entanglement in Complex Adaptive Systems
Source: Research Square preprint supplement (doi:10.21203/rs.3.rs-6846233/v1), 2025-06-16
Supplement: Supplementary file 13 [file 20030616-20.xls]

## Sheet: Sheet1
0.24	144					144	34.56	0.000239637
0.23	0					0	0	0
0.22	0					0	0	0
0.21	809					809	169.89	0.00134629
0.2	0	239			294	533	106.6	0.00088699
0.19	149	210			1094	1453	276.07	0.002418
0.18	12	290			1203	1505	270.9	0.00250454
0.17	24	436			2407	2867	487.39	0.00477111
0.16	789	2			1702	2493	398.88	0.00414871
0.15	0	244			1995	2239	335.85	0.00372602
0.14	387	3086			2041	5514	771.96	0.0091761
0.13	173	1705		1237	5932	9047	1176.11	0.0150555
0.12	31	781		1337	3426	5575	669	0.00927761
0.11	228	830		141	6517	7716	848.76	0.0128405
0.1	0	1499		3505	2945	7949	794.9	0.0132283
0.09	0	6893	6882	1147	3850	18772	1689.48	0.0312393
0.08	32	2461	6603	8590	11661	29347	2347.76	0.0488377
0.07	270	5819	5396	9179	2893	23557	1648.99	0.0392023
0.06	5553	3584	4918	7486	610	22151	1329.06	0.0368625
0.05	4127	3245	3157	3564	2031	16124	806.2	0.0268327
0.04	4106	8497	10237	3527	708	27075	1083	0.0450567
0.03	1731	3653	6425	11630	1414	24853	745.59	0.041359
0.02	3232	7565	3107	8765	256	22925	458.5	0.0381505
0.01	4839	8700	4783	6627	36	24985	249.85	0.0415787
-8.67362e-17	3240	2456	3492	6266	563	16017	-1.38925e-12	0.0266546
-0.01	3969	24730	27711	7136	729	64275	-642.75	0.106963
-0.02	3606	6327	4880	15577	2375	32765	-655.3	0.0545257
-0.03	7850	9901	22329	4484	1207	45771	-1373.13	0.0761696
-0.04	19325	3600	18447	6902	1777	50051	-2002.04	0.0832921
-0.05	3661	8058	8926	4106	1405	26156	-1307.8	0.0435274
-0.06	3502	21066	7714	5129	2382	39793	-2387.58	0.0662213
-0.07	1389	3114	636	6228	5881	17248	-1207.36	0.0287032
-0.08	657	5305	1605	7579	258	15404	-1232.32	0.0256345
-0.09	205		1168	2275	1873	5521	-496.89	0.00918775
-0.1			1004	640	183	1827	-182.7	0.00304039
-0.11			1631	3705	1192	6528	-718.08	0.0108635
-0.12					344	344	-41.28	0.000572466
-0.13					167	167	-21.71	0.000277912
-0.14					266	266	-37.24	0.000442663
-0.15					220	220	-33	0.000366112
-0.16					81	81	-12.96	0.000134796
-0.17					1370	1370	-232.9	0.00227988
-0.18					1730	1730	-311.4	0.00287897
-0.19					7166	7166	-1361.54	0.0119253
-0.2					8375	8375	-1675	0.0139372
-0.21					2201	2201	-462.21	0.00366278
						600909	0.000506083
