# Supplementary material for: Interaction Wave Functions and Interaction-Based Coherence and Entanglement in Complex Adaptive Systems
Source: Research Square preprint supplement (doi:10.21203/rs.3.rs-6846233/v1), 2025-06-16
Supplement: Supplementary file 14 [file 20030616.xls]

## Sheet: Sheet1
12.78	144	1840.32	0.00194489		0.24
12.77	0	0	0		0.23
12.76	0	0	0		0.22
12.75	809	10314.8	0.0109265		0.21
12.74	0	0	0		0.2
12.73	149	1896.77	0.00201243		0.19
12.72	12	152.64	0.000162075		0.18
12.71	24	305.04	0.000324149		0.17
12.7	789	10020.3	0.0106564		0.16
12.69	0	0	0		0.15
12.68	387	4907.16	0.0052269		0.14
12.67	173	2191.91	0.00233657		0.13
12.66	31	392.46	0.000418693		0.12
12.65	228	2884.2	0.00307942		0.11
12.64	0	0	0		0.1
12.63	0	0	0		0.09
12.62	32	403.84	0.000432199		0.08
12.61	270	3404.7	0.00364668		0.07
12.6	5553	69967.8	0.075		0.06
12.59	4127	51958.9	0.0557401		0.05
12.58	4106	51653.5	0.0554565		0.04
12.57	1731	21758.7	0.0233793		0.03
12.56	3232	40593.9	0.0436521		0.02
12.55	4839	60729.5	0.0653566		0.01
12.54	3240	40629.6	0.0437601		0
12.53	3969	49731.6	0.0536062		-0.01
12.52	3606	45147.1	0.0487034		-0.02
12.51	7850	98203.5	0.106024		-0.03
12.5	19325	241563	0.261008		-0.04
12.49	3661	45725.9	0.0494462		-0.05
12.48	3502	43705	0.0472988		-0.06
12.47	1389	17320.8	0.0187601		-0.07
12.46	657	8186.22	0.00887358		-0.08
12.45	205	2552.25	0.00276877		-0.09
	74040	12.5357
