# Supplementary material for: Interaction Wave Functions and Interaction-Based Coherence and Entanglement in Complex Adaptive Systems
Source: Research Square preprint supplement (doi:10.21203/rs.3.rs-6846233/v1), 2025-06-16
Supplement: Supplementary file 15 [file 20030617.xls]

## Sheet: Sheet1
12.51	239	2989.89	0.00165632		0.2
12.5	210	2625	0.00145534		0.19
12.49	290	3622.1	0.00200976		0.18
12.48	436	5441.28	0.00302157		0.17
12.47	2	24.94	1.38604e-05		0.16
12.46	244	3040.24	0.00169097		0.15
12.45	3086	38420.7	0.0213866		0.14
12.44	1705	21210.2	0.011816		0.13
12.43	781	9707.83	0.00541249		0.12
12.42	830	10308.6	0.00575207		0.11
12.41	1499	18602.6	0.0103884		0.1
12.4	6893	85473.2	0.0477699		0.09
12.39	2461	30491.8	0.0170552		0.08
12.38	5819	72039.2	0.0403268		0.07
12.37	3584	44334.1	0.0248378		0.06
12.36	3245	40108.2	0.0224885		0.05
12.35	8497	104938	0.0588859		0.04
12.34	3653	45078	0.025316		0.03
12.33	7565	93276.5	0.052427		0.02
12.32	8700	107184	0.0602927		0.01
12.31	2456	30233.4	0.0170206		0
12.3	24730	304179	0.171384		-0.01
12.29	6327	77758.8	0.0438474		-0.02
12.28	9901	121584	0.0686159		-0.03
12.27	3600	44172	0.0249487		-0.04
12.26	8058	98791.1	0.0558435		-0.05
12.25	21066	258059	0.145992		-0.06
12.24	3114	38115.4	0.0215806		-0.07
12.23	5305	64880.2	0.0367647		-0.08
	144296	12.3128
