# Supplementary material for: Interaction Wave Functions and Interaction-Based Coherence and Entanglement in Complex Adaptive Systems
Source: Research Square preprint supplement (doi:10.21203/rs.3.rs-6846233/v1), 2025-06-16
Supplement: Supplementary file 16 [file 20030618.xls]

## Sheet: Sheet1
12.4	6882	85336.8	0.0455608		0.09
12.39	6603	81811.2	0.0437137		0.08
12.38	5396	66802.5	0.035723		0.07
12.37	4918	60835.7	0.0325585		0.06
12.36	3157	39020.5	0.0209002		0.05
12.35	10237	126427	0.0677718		0.04
12.34	6425	79284.5	0.0425353		0.03
12.33	3107	38309.3	0.0205692		0.02
12.32	4783	58926.6	0.0316648		0.01
12.31	3492	42986.5	0.023118		0
12.3	27711	340845	0.183455		-0.01
12.29	4880	59975.2	0.032307		-0.02
12.28	22329	274200	0.147824		-0.03
12.27	18447	226345	0.122124		-0.04
12.26	8926	109433	0.0590926		-0.05
12.25	7714	94496.5	0.0510688		-0.06
12.24	636	7784.64	0.0042105		-0.07
12.23	1605	19629.2	0.0106256		-0.08
12.22	1168	14273	0.00773249		-0.09
12.21	1004	12258.8	0.00664676		-0.1
12.2	1631	19898.2	0.0107977		-0.11
	151051	12.3063
