# Supplementary material for: Interaction Wave Functions and Interaction-Based Coherence and Entanglement in Complex Adaptive Systems
Source: Research Square preprint supplement (doi:10.21203/rs.3.rs-6846233/v1), 2025-06-16
Supplement: Supplementary file 17 [file 20030619.xls]

## Sheet: Sheet1
12.45	1237	15400.6	0.00904491		0.13
12.44	1337	16632.3	0.00977611		0.12
12.43	141	1752.63	0.00103099		0.11
12.42	3505	43532.1	0.0256285		0.1
12.41	1147	14234.3	0.00838683		0.09
12.4	8590	106516	0.0628098		0.08
12.39	9179	113728	0.0671166		0.07
12.38	7486	92676.7	0.0547374		0.06
12.37	3564	44086.7	0.0260599		0.05
12.36	3527	43593.7	0.0257893		0.04
12.35	11630	143631	0.0850382		0.03
12.34	8765	108160	0.0640894		0.02
12.33	6627	81710.9	0.0484564		0.01
12.32	6266	77197.1	0.0458168		0
12.31	7136	87844.2	0.0521782		-0.01
12.3	15577	191597	0.113899		-0.02
12.29	4484	55108.4	0.0327869		-0.03
12.28	6902	84756.6	0.0504672		-0.04
12.27	4106	50380.6	0.030023		-0.05
12.26	5129	62881.5	0.0375031		-0.06
12.25	6228	76293	0.045539		-0.07
12.24	7579	92767	0.0554174		-0.08
12.23	2275	27823.3	0.0166347		-0.09
12.22	640	7820.8	0.00467966		-0.1
12.21	3705	45238.1	0.0270909		-0.11
	136762	12.3233
