# Supplementary material for: Interaction Wave Functions and Interaction-Based Coherence and Entanglement in Complex Adaptive Systems
Source: Research Square preprint supplement (doi:10.21203/rs.3.rs-6846233/v1), 2025-06-16
Supplement: Supplementary file 18 [file 20030620.xls]

## Sheet: Sheet1
12.47	294	3666.18	0.00310257		0.2
12.46	1094	13631.2	0.011545		0.19
12.45	1203	14977.4	0.0126952		0.18
12.44	2407	29943.1	0.025401		0.17
12.43	1702	21155.9	0.0179612		0.16
12.42	1995	24777.9	0.0210532		0.15
12.41	2041	25328.8	0.0215386		0.14
12.4	5932	73556.8	0.0626003		0.13
12.39	3426	42448.1	0.0361545		0.12
12.38	6517	80680.5	0.0687737		0.11
12.37	2945	36429.7	0.0310785		0.1
12.36	3850	47586	0.040629		0.09
12.35	11661	144013	0.123058		0.08
12.34	2893	35699.6	0.0305298		0.07
12.33	610	7521.3	0.00643732		0.06
12.32	2031	25021.9	0.0214331		0.05
12.31	708	8715.48	0.00747151		0.04
12.3	1414	17392.2	0.0149219		0.03
12.29	256	3146.24	0.00270156		0.02
12.28	36	442.08	0.000379907		0.01
12.27	563	6908.01	0.00594133		0
12.26	729	8937.54	0.00769312		-0.01
12.25	2375	29093.8	0.0250633		-0.02
12.24	1207	14773.7	0.0127374		-0.03
12.23	1777	21732.7	0.0187526		-0.04
12.22	1405	17169.1	0.0148269		-0.05
12.21	2382	29084.2	0.0251372		-0.06
12.2	5881	71748.2	0.0620621		-0.07
12.19	258	3145.02	0.00272267		-0.08
12.18	1873	22813.1	0.0197657		-0.09
12.17	183	2227.11	0.00193119		-0.1
12.16	1192	14494.7	0.0125791		-0.11
12.15	344	4179.6	0.00363022		-0.12
12.14	167	2027.38	0.00176235		-0.13
12.13	266	3226.58	0.00280709		-0.14
12.12	220	2666.4	0.00232165		-0.15
12.11	81	980.91	0.000854791		-0.16
12.1	1370	16577	0.0144576		-0.17
12.09	1730	20915.7	0.0182566		-0.18
12.08	7166	86565.3	0.0756226		-0.19
12.07	8375	101086	0.0883812		-0.2
12.06	2201	26544.1	0.0232271		-0.21
	94760	12.2734
