# Supplementary material for: Interaction Wave Functions and Interaction-Based Coherence and Entanglement in Complex Adaptive Systems
Source: Research Square preprint supplement (doi:10.21203/rs.3.rs-6846233/v1), 2025-06-16
Supplement: Supplementary file 19 [file 20030623-27.xls]

## Sheet: Sheet1
0.27				187		187	50.49	0.00037782
0.26				583		583	151.58	0.00117791
0.25				1416		1416	354	0.00286092
0.24				1459		1459	350.16	0.0029478
0.23				3230		3230	742.9	0.00652598
0.22				1547		1547	340.34	0.0031256
0.21				746		746	156.66	0.00150724
0.2				353		353	70.6	0.000713211
0.19				304		304	57.76	0.00061421
0.18				626	1072	1698	305.64	0.00343068
0.17	524		71	2065	918	3578	608.26	0.00722909
0.16	1099		692	964	3486	6241	998.56	0.0126095
0.15	1136		424	6698	3726	11984	1797.6	0.0242128
0.14	890		357	918	1929	4094	573.16	0.00827163
0.13	1199		1870	2683	1534	7286	947.18	0.0147208
0.12	1360	2333	1253	2530	1387	8863	1063.56	0.017907
0.11	14	32	702	12521	1256	14525	1597.75	0.0293467
0.1	1527	647	285	11029	3809	17297	1729.7	0.0349473
0.09	1633	945	1156	3670	970	8374	753.66	0.0169191
0.08	1843	1111	1355	3579	764	8652	692.16	0.0174807
0.07	2668	235	2261	5610	437	11211	784.77	0.022651
0.06	1023	1834	2546	2045	6246	13694	821.64	0.0276677
0.05	1188	1389	1693	4248	2036	10554	527.7	0.0213236
0.04	3057	9568	4103	1044	2144	19916	796.64	0.0402388
0.03	1580	5714	8896	60	2479	18729	561.87	0.0378406
0.02	6272	12795	4396	0	2396	25859	517.18	0.0522462
0.01	4725	3626	8458	211	1883	18903	189.03	0.0381921
-8.67362e-17	10125	2552	4770	1767	3523	22737	-1.97212e-12	0.0459384
-0.01	6533	7701	2497	3750	1994	22475	-224.75	0.0454091
-0.02	6715	6220	5516	387	2180	21018	-420.36	0.0424653
-0.03	13561	2989	662	3727	1097	22036	-661.08	0.0445221
-0.04	3935	4617	678	1824	4754	15808	-632.32	0.0319389
-0.05	6371	5982	387	5866	1859	20465	-1023.25	0.041348
-0.06	4557	11127	998	8060	1091	25833	-1549.98	0.0521937
-0.07	3111	1629	8272	7903	48	20963	-1467.41	0.0423542
-0.08	1003	4626	2639	9724	1285	19277	-1542.16	0.0389478
-0.09		61	5087	2029	3869	11046	-994.14	0.0223176
-0.1			1953	7337	1931	11221	-1122.1	0.0226712
-0.11			2165	4250	955	7370	-810.7	0.0148905
-0.12			2008	2832	1951	6791	-814.92	0.0137207
-0.13			517	8216	13832	22565	-2933.45	0.0455909
-0.14				9652	3338	12990	-1818.6	0.0262453
-0.15				8822		8822	-1323.3	0.0178242
-0.16				753		753	-120.48	0.00152138
-0.17				492		492	-83.64	0.00099405
-0.18				1000		1000	-180	0.00202043
						494945	-0.000367899
