# Supplementary material for: Interaction Wave Functions and Interaction-Based Coherence and Entanglement in Complex Adaptive Systems
Source: Research Square preprint supplement (doi:10.21203/rs.3.rs-6846233/v1), 2025-06-16
Supplement: Supplementary file 20 [file 20030623.xls]

## Sheet: Sheet1
12.05	524	6314.2	0.00597839		0.17
12.04	1099	13232	0.0125386		0.16
12.03	1136	13666.1	0.0129608		0.15
12.02	890	10697.8	0.0101541		0.14
12.01	1199	14400	0.0136796		0.13
12	1360	16320	0.0155164		0.12
11.99	14	167.86	0.000159728		0.11
11.98	1527	18293.5	0.0174218		0.1
11.97	1633	19547	0.0186311		0.09
11.96	1843	22042.3	0.0210271		0.08
11.95	2668	31882.6	0.0304396		0.07
11.94	1023	12214.6	0.0116716		0.06
11.93	1188	14172.8	0.0135541		0.05
11.92	3057	36439.4	0.0348778		0.04
11.91	1580	18817.8	0.0180264		0.03
11.9	6272	74636.8	0.0715581		0.02
11.89	4725	56180.3	0.0539082		0.01
11.88	10125	120285	0.115518		0
11.87	6533	77546.7	0.0745359		-0.01
11.86	6715	79639.9	0.0766124		-0.02
11.85	13561	160698	0.154719		-0.03
11.84	3935	46590.4	0.044895		-0.04
11.83	6371	75368.9	0.0726877		-0.05
11.82	4557	53863.7	0.0519915		-0.06
11.81	3111	36740.9	0.0354938		-0.07
11.8	1003	11835.4	0.0114434		-0.08
	87649	11.8837
