# Supplementary material for: Interaction Wave Functions and Interaction-Based Coherence and Entanglement in Complex Adaptive Systems
Source: Research Square preprint supplement (doi:10.21203/rs.3.rs-6846233/v1), 2025-06-16
Supplement: Supplementary file 21 [file 20030624.xls]

## Sheet: Sheet1
11.88	2333	27716	0.026592		0.12
11.87	32	379.84	0.000364743		0.11
11.86	647	7673.42	0.00737465		0.1
11.85	945	11198.3	0.0107713		0.09
11.84	1111	13154.2	0.0126634		0.08
11.83	235	2780.05	0.00267858		0.07
11.82	1834	21677.9	0.0209043		0.06
11.81	1389	16404.1	0.0158321		0.05
11.8	9568	112902	0.109058		0.04
11.79	5714	67368.1	0.0651294		0.03
11.78	12795	150725	0.14584		0.02
11.77	3626	42678	0.0413299		0.01
11.76	2552	30011.5	0.0290883		0
11.75	7701	90486.8	0.0877777		-0.01
11.74	6220	73022.8	0.0708969		-0.02
11.73	2989	35061	0.0340693		-0.03
11.72	4617	54111.2	0.0526256		-0.04
11.71	5982	70049.2	0.0681841		-0.05
11.7	11127	130186	0.126828		-0.06
11.69	1629	19043	0.0185677		-0.07
11.68	4626	54031.7	0.0527282		-0.08
11.67	61	711.87	0.000695291		-0.09
	87733	11.7558
