# Supplementary material for: Interaction Wave Functions and Interaction-Based Coherence and Entanglement in Complex Adaptive Systems
Source: Research Square preprint supplement (doi:10.21203/rs.3.rs-6846233/v1), 2025-06-16
Supplement: Supplementary file 22 [file 20030625.xls]

## Sheet: Sheet1
11.84	71	840.64	0.000902539		0.17
11.83	692	8186.36	0.00879657		0.16
11.82	424	5011.68	0.00538981		0.15
11.81	357	4216.17	0.00453812		0.14
11.8	1870	22066	0.0237711		0.13
11.79	1253	14772.9	0.0159279		0.12
11.78	702	8269.56	0.00892369		0.11
11.77	285	3354.45	0.00362287		0.1
11.76	1156	13594.6	0.0146949		0.09
11.75	1355	15921.3	0.0172245		0.08
11.74	2261	26544.1	0.0287414		0.07
11.73	2546	29864.6	0.0323643		0.06
11.72	1693	19842	0.0215211		0.05
11.71	4103	48046.1	0.0521566		0.04
11.7	8896	104083	0.113084		0.03
11.69	4396	51389.2	0.0558811		0.02
11.68	8458	98789.4	0.107516		0.01
11.67	4770	55665.9	0.0606353		0
11.66	2497	29115	0.0317414		-0.01
11.65	5516	64261.4	0.0701183		-0.02
11.64	662	7705.68	0.00841522		-0.03
11.63	678	7885.14	0.00861861		-0.04
11.62	387	4496.94	0.00491947		-0.05
11.61	998	11586.8	0.0126864		-0.06
11.6	8272	95955.2	0.105152		-0.07
11.59	2639	30586	0.0335465		-0.08
11.58	5087	58907.5	0.064665		-0.09
11.57	1953	22596.2	0.0248262		-0.1
11.56	2165	25027.4	0.0275211		-0.11
11.55	2008	23192.4	0.0255253		-0.12
11.54	517	5966.18	0.00657201		-0.13
	78667	11.6661
