# Supplementary material for: Interaction Wave Functions and Interaction-Based Coherence and Entanglement in Complex Adaptive Systems
Source: Research Square preprint supplement (doi:10.21203/rs.3.rs-6846233/v1), 2025-06-16
Supplement: Supplementary file 23 [file 20030626.xls]

## Sheet: Sheet1
11.92	187	2229.04	0.0011782		0.27
11.91	583	6943.53	0.0036732		0.26
11.9	1416	16850.4	0.00892154		0.25
11.89	1459	17347.5	0.00919246		0.24
11.88	3230	38372.4	0.0203507		0.23
11.87	1547	18362.9	0.00974691		0.22
11.86	746	8847.56	0.00470019		0.21
11.85	353	4183.05	0.00222408		0.2
11.84	304	3599.36	0.00191536		0.19
11.83	626	7405.58	0.00394413		0.18
11.82	2065	24408.3	0.0130106		0.17
11.81	964	11384.8	0.0060737		0.16
11.8	6698	79036.4	0.0422009		0.15
11.79	918	10823.2	0.00578388		0.14
11.78	2683	31605.7	0.0169043		0.13
11.77	2530	29778.1	0.0159403		0.12
11.76	12521	147247	0.0788888		0.11
11.75	11029	129591	0.0694885		0.1
11.74	3670	43085.8	0.0231229		0.09
11.73	3579	41981.7	0.0225496		0.08
11.72	5610	65749.2	0.0353459		0.07
11.71	2045	23947	0.0128846		0.06
11.7	4248	49701.6	0.0267646		0.05
11.69	1044	12204.4	0.00657775		0.04
11.68	60	700.8	0.000378031		0.03
11.67	0	0	0		0.02
11.66	211	2460.26	0.00132941		0.01
11.65	1767	20585.6	0.011133		0
11.64	3750	43650	0.023627		-0.01
11.63	387	4500.81	0.0024383		-0.02
11.62	3727	43307.7	0.023482		-0.03
11.61	1824	21176.6	0.0114922		-0.04
11.6	5866	68045.6	0.0369589		-0.05
11.59	8060	93415.4	0.0507822		-0.06
11.58	7903	91516.7	0.049793		-0.07
11.57	9724	112507	0.0612663		-0.08
11.56	2029	23455.2	0.0127838		-0.09
11.55	7337	84742.4	0.0462269		-0.1
11.54	4250	49045	0.0267772		-0.11
11.53	2832	32653	0.0178431		-0.12
11.52	8216	94648.3	0.0517651		-0.13
11.51	9652	111095	0.0608126		-0.14
11.5	8822	101453	0.0555832		-0.15
11.49	753	8651.97	0.00474429		-0.16
11.48	492	5648.16	0.00309986		-0.17
11.47	1000	11470	0.00630052		-0.18
	158717	11.6523
