# Supplementary material for: Interaction Wave Functions and Interaction-Based Coherence and Entanglement in Complex Adaptive Systems
Source: Research Square preprint supplement (doi:10.21203/rs.3.rs-6846233/v1), 2025-06-16
Supplement: Supplementary file 24 [file 20030627.xls]

## Sheet: Sheet1
11.82	1072	12671	0.0130447		0.18
11.81	918	10841.6	0.0111707		0.17
11.8	3486	41134.8	0.0424196		0.16
11.79	3726	43929.5	0.0453401		0.15
11.78	1929	22723.6	0.0234732		0.14
11.77	1534	18055.2	0.0186666		0.13
11.76	1387	16311.1	0.0168778		0.12
11.75	1256	14758	0.0152837		0.11
11.74	3809	44717.7	0.04635		0.1
11.73	970	11378.1	0.0118035		0.09
11.72	764	8954.08	0.00929678		0.08
11.71	437	5117.27	0.00531766		0.07
11.7	6246	73078.2	0.0760048		0.06
11.69	2036	23800.8	0.0247752		0.05
11.68	2144	25041.9	0.0260894		0.04
11.67	2479	28929.9	0.0301659		0.03
11.66	2396	27937.4	0.0291559		0.02
11.65	1883	21937	0.0229134		0.01
11.64	3523	41007.7	0.0428698		0
11.63	1994	23190.2	0.0242641		-0.01
11.62	2180	25331.6	0.0265275		-0.02
11.61	1097	12736.2	0.0133489		-0.03
11.6	4754	55146.4	0.0578493		-0.04
11.59	1859	21545.8	0.0226214		-0.05
11.58	1091	12633.8	0.0132759		-0.06
11.57	48	555.36	0.000584091		-0.07
11.56	1285	14854.6	0.0156366		-0.08
11.55	3869	44687	0.0470802		-0.09
11.54	1931	22283.7	0.0234975		-0.1
11.53	955	11011.2	0.011621		-0.11
11.52	1951	22475.5	0.0237409		-0.12
11.51	13832	159206	0.168316		-0.13
11.5	3338	38387	0.0406186		-0.14
	82179	11.6376
