# Supplementary material for: Interaction Wave Functions and Interaction-Based Coherence and Entanglement in Complex Adaptive Systems
Source: Research Square preprint supplement (doi:10.21203/rs.3.rs-6846233/v1), 2025-06-16
Supplement: Supplementary file 25 [file 20030630.xls]

## Sheet: Sheet1
11.83	166	1963.78	0.00290677		0.22
11.82	1328	15697	0.0232542		0.21
11.81	364	4298.84	0.00637389		0.2
11.8	1477	17428.6	0.0258633		0.19
11.79	557	6567.03	0.00975345		0.18
11.78	1403	16527.3	0.0245675		0.17
11.77	663	7803.51	0.0116096		0.16
11.76	689	8102.64	0.0120649		0.15
11.75	758	8906.5	0.0132731		0.14
11.74	194	2277.56	0.00339707		0.13
11.73	410	4809.3	0.00717938		0.12
11.72	973	11403.6	0.0170379		0.11
11.71	798	9344.58	0.0139735		0.1
11.7	4391	51374.7	0.0768894		0.09
11.69	2332	27261.1	0.0408349		0.08
11.68	2481	28978.1	0.043444		0.07
11.67	315	3676.05	0.00551586		0.06
11.66	249	2903.34	0.00436016		0.05
11.65	789	9191.85	0.0138159		0.04
11.64	636	7403.04	0.0111368		0.03
11.63	1407	16363.4	0.0246375		0.02
11.62	665	7727.3	0.0116446		0.01
11.61	594	6896.34	0.0104013		0
11.6	3027	35113.2	0.0530048		-0.01
11.59	720	8344.8	0.0126077		-0.02
11.58	4330	50141.4	0.0758213		-0.03
11.57	612	7080.84	0.0107165		-0.04
11.56	488	5641.28	0.00854521		-0.05
11.55	3562	41141.1	0.062373		-0.06
11.54	5159	59534.9	0.0903376		-0.07
11.53	2635	30381.6	0.0461406		-0.08
11.52	1692	19491.8	0.0296281		-0.09
11.51	3102	35704	0.0543181		-0.1
11.5	7480	86020	0.13098		-0.11
11.49	662	7606.38	0.0115921		-0.12
	57108	11.6114
