# Supplementary material for: Interaction Wave Functions and Interaction-Based Coherence and Entanglement in Complex Adaptive Systems
Source: Research Square preprint supplement (doi:10.21203/rs.3.rs-6846233/v1), 2025-06-16
Supplement: Supplementary file 26 [file 30602-06.xls]

## Sheet: Sheet1
0.17			5597			5597	951.49	0.0377683
0.16			4780			4780	764.8	0.0322552
0.15			2726			2726	408.9	0.0183949
0.14			4780			4780	669.2	0.0322552
0.13			2726			2726	354.38	0.0183949
0.12			1569			1569	188.28	0.0105875
0.11			0			0	0	0
0.1			114	67		181	18.1	0.00122138
0.09			649	511		1160	104.4	0.00782763
0.08			1785	1513		3298	263.84	0.0222548
0.07			230	600		830	58.1	0.0056008
0.06	191		868	284	230	1573	94.38	0.0106145
0.05	345		430	794	1949	3518	175.9	0.0237393
0.04	18	194	1828	1989	2466	6495	259.8	0.043828
0.03	205	2601	3065	3626	3543	13040	391.2	0.0879934
0.02	340	1578	1040	4521	2188	9667	193.34	0.0652325
0.01	3261	5752	287	3081	1203	13584	135.84	0.0916642
0	4553	3239	742	6372	1976	16882	0	0.113919
-0.01	5989	2642	1095	3873	1843	15442	-154.42	0.104202
-0.02	4475	1918	1221	2517	1654	11785	-235.7	0.0795247
-0.03	15	968	1243	1974	2673	6873	-206.19	0.0463787
-0.04		885	867	2997	3720	8469	-338.76	0.0571484
-0.05		70	1476	3845	2026	7417	-370.85	0.0500496
-0.06			2681	678	337	3696	-221.76	0.0249404
-0.07			941			941	-65.87	0.00634983
-0.08			830			830	-66.4	0.0056008
-0.09			334			334	-30.06	0.00225382
						148193	0.0225513
