# Supplementary material for: Interaction Wave Functions and Interaction-Based Coherence and Entanglement in Complex Adaptive Systems
Source: Research Square preprint supplement (doi:10.21203/rs.3.rs-6846233/v1), 2025-06-16
Supplement: Supplementary file 27 [file 30602.xls]

## Sheet: Sheet1
5.49	191	1048.59	0.00984942		0.06
5.48	345	1890.6	0.0177908		0.05
5.47	18	98.46	0.000928218		0.04
5.46	205	1119.3	0.0105714		0.03
5.45	340	1853	0.017533		0.02
5.44	3261	17739.8	0.168162		0.01
5.43	4553	24722.8	0.234788		0
5.42	5989	32460.4	0.308839		-0.01
5.41	4475	24209.8	0.230765		-0.02
5.4	15	81	0.000773515		-0.03
	19392	5.42614
