# Supplementary material for: Interaction Wave Functions and Interaction-Based Coherence and Entanglement in Complex Adaptive Systems
Source: Research Square preprint supplement (doi:10.21203/rs.3.rs-6846233/v1), 2025-06-16
Supplement: Supplementary file 28 [file 30603.xls]

## Sheet: Sheet1
5.53	194	1072.82	0.00977478		0.04
5.52	2601	14357.5	0.131053		0.03
5.51	1578	8694.78	0.0795082		0.02
5.5	5752	31636	0.289817		0.01
5.49	3239	17782.1	0.163198		0
5.48	2642	14478.2	0.133118		-0.01
5.47	1918	10491.5	0.0966393		-0.02
5.46	968	5285.28	0.0487731		-0.03
5.45	885	4823.25	0.0445911		-0.04
5.44	70	380.8	0.00352698		-0.05
	19847	5.49212
