# Supplementary material for: Interaction Wave Functions and Interaction-Based Coherence and Entanglement in Complex Adaptive Systems
Source: Research Square preprint supplement (doi:10.21203/rs.3.rs-6846233/v1), 2025-06-16
Supplement: Supplementary file 29 [file 30604.xls]

## Sheet: Sheet1
5.82	164	954.48	0.00189317
5.81	735	4270.35	0.00848465
5.8	2435	14123	0.028109
5.79	1385	8019.15	0.0159881
5.78	1101	6363.78	0.0127097
5.77	717	4137.09	0.00827687
5.76	667	3841.92	0.00769968
5.75	391	2248.25	0.0045136
5.74	1445	8294.3	0.0166807
5.73	1633	9357.09	0.0188509
5.72	9029	51645.9	0.104228
5.71	9887	56454.8	0.114133
5.7	9997	56982.9	0.115403
5.69	3137	17849.5	0.0362127
5.68	5597	31791	0.0646103		0.17
5.67	4780	27102.6	0.0551791		0.16
5.66	2726	15429.2	0.0314682		0.15
5.65	4780	27007	0.0551791		0.14
5.64	2726	15374.6	0.0314682		0.13
5.63	1569	8833.47	0.0181121		0.12
5.62	0	0	0		0.11
5.61	114	639.54	0.00131599		0.1
5.6	649	3634.4	0.00749189		0.09
5.59	1785	9978.15	0.0206056		0.08
5.58	230	1283.4	0.00265506		0.07
5.57	868	4834.76	0.01002		0.06
5.56	430	2390.8	0.00496381		0.05
5.55	1828	10145.4	0.021102		0.04
5.54	3065	16980.1	0.0353816		0.03
5.53	1040	5751.2	0.0120055		0.02
5.52	287	1584.24	0.00331305		0.01
5.51	742	4088.42	0.00856546		0
5.5	1095	6022.5	0.0126404		-0.01
5.49	1221	6703.29	0.0140949		-0.02
5.48	1243	6811.64	0.0143489		-0.03
5.47	867	4742.49	0.0100084		-0.04
5.46	1476	8058.96	0.0170386		-0.05
5.45	2681	14611.5	0.0309488		-0.06
5.44	941	5119.04	0.0108627		-0.07
5.43	830	4506.9	0.00958131		-0.08
5.42	334	1810.28	0.00385561		-0.09
	86627	5.65386
