# Supplementary material for: Interaction Wave Functions and Interaction-Based Coherence and Entanglement in Complex Adaptive Systems
Source: Research Square preprint supplement (doi:10.21203/rs.3.rs-6846233/v1), 2025-06-16
Supplement: Supplementary file 30 [file 30605.xls]

## Sheet: Sheet1
5.7	67	381.9	0.00170735		0.1
5.69	511	2907.59	0.0130218		0.09
5.68	1513	8593.84	0.0385556		0.08
5.67	600	3402	0.0152897		0.07
5.66	284	1607.44	0.00723714		0.06
5.65	794	4486.1	0.0202334		0.05
5.64	1989	11218	0.0506855		0.04
5.63	3626	20414.4	0.092401		0.03
5.62	4521	25408	0.115208		0.02
5.61	3081	17284.4	0.0785128		0.01
5.6	6372	35683.2	0.162377		0
5.59	3873	21650.1	0.0986953		-0.01
5.58	2517	14044.9	0.0641405		-0.02
5.57	1974	10995.2	0.0503032		-0.03
5.56	2997	16663.3	0.0763723		-0.04
5.55	3845	21339.8	0.0979818		-0.05
5.54	678	3756.12	0.0172774		-0.06
	39242	5.60206
