# Supplementary material for: Interaction Wave Functions and Interaction-Based Coherence and Entanglement in Complex Adaptive Systems
Source: Research Square preprint supplement (doi:10.21203/rs.3.rs-6846233/v1), 2025-06-16
Supplement: Supplementary file 31 [file 30606.xls]

## Sheet: Sheet1
5.62	230	1292.6	0.00891197		0.06
5.61	1949	10933.9	0.0755192		0.05
5.6	2466	13809.6	0.0955518		0.04
5.59	3543	19805.4	0.137283		0.03
5.58	2188	12209	0.0847799		0.02
5.57	1203	6700.71	0.0466135		0.01
5.56	1976	10986.6	0.0765654		0
5.55	1843	10228.7	0.071412		-0.01
5.54	1654	9163.16	0.0640887		-0.02
5.53	2673	14781.7	0.103573		-0.03
5.52	3720	20534.4	0.144141		-0.04
5.51	2026	11163.3	0.0785028		-0.05
5.5	337	1853.5	0.013058		-0.06
	25808	5.55884
