# Supplementary material for: Interaction Wave Functions and Interaction-Based Coherence and Entanglement in Complex Adaptive Systems
Source: Research Square preprint supplement (doi:10.21203/rs.3.rs-6846233/v1), 2025-06-16
Supplement: Supplementary file 32 [file 30609-13.xls]

## Sheet: Sheet1
0.07	50					50	3.5	0.000272711
0.06	259				4077	4336	260.16	0.0236495
0.05	379	588	1775		3424	6166	308.3	0.0336308
0.04	477	512	2663	263	3562	7477	299.08	0.0407813
0.03	2846	2024	6161	446	4818	16295	488.85	0.0888766
0.02	1655	4105	3376	1246	8837	19219	384.38	0.104825
0.01	4076	3129	6217	3416	3715	20553	205.53	0.112101
0	2661	4582	7523	6181	4430	25377	0	0.138412
-0.01	2146	2419	8728	4766	5875	23934	-239.34	0.130541
-0.02	2609	3454	5662	2457	3285	17467	-349.34	0.095269
-0.03	1270	776	5173	820	12987	21026	-630.78	0.114681
-0.04	216	577	3500		7681	11974	-478.96	0.0653089
-0.05			977		6003	6980	-349	0.0380705
-0.06			384		1324	1708	-102.48	0.00931582
-0.07			260		46	306	-21.42	0.00166899
-0.08			131		128	259	-20.72	0.00141265
-0.09			71		73	144	-12.96	0.000785409
-0.1			14			14	-1.4	7.63592e-05
-0.11			59			59	-6.49	0.000321799
						183344	-0.00143495
