# Supplementary material for: Interaction Wave Functions and Interaction-Based Coherence and Entanglement in Complex Adaptive Systems
Source: Research Square preprint supplement (doi:10.21203/rs.3.rs-6846233/v1), 2025-06-16
Supplement: Supplementary file 33 [file 30609.xls]

## Sheet: Sheet1
5.59	50	279.5	0.00268183		0.07
5.58	259	1445.22	0.0138919		0.06
5.57	379	2111.03	0.0203283		0.05
5.56	477	2652.12	0.0255846		0.04
5.55	2846	15795.3	0.15265		0.03
5.54	1655	9168.7	0.0887685		0.02
5.53	4076	22540.3	0.218623		0.01
5.52	2661	14688.7	0.142727		0
5.51	2146	11824.5	0.115104		-0.01
5.5	2609	14349.5	0.139938		-0.02
5.49	1270	6972.3	0.0681184		-0.03
5.48	216	1183.68	0.0115855		-0.04
	18644	5.52515
