# Supplementary material for: Interaction Wave Functions and Interaction-Based Coherence and Entanglement in Complex Adaptive Systems
Source: Research Square preprint supplement (doi:10.21203/rs.3.rs-6846233/v1), 2025-06-16
Supplement: Supplementary file 34 [file 30610.xls]

## Sheet: Sheet1
5.6	588	3292.8	0.0265271		0.05
5.59	512	2862.08	0.0230984		0.04
5.58	2024	11293.9	0.091311		0.03
5.57	4105	22864.9	0.185194		0.02
5.56	3129	17397.2	0.141162		0.01
5.55	4582	25430.1	0.206713		0
5.54	2419	13401.3	0.109131		-0.01
5.53	3454	19100.6	0.155824		-0.02
5.52	776	4283.52	0.0350086		-0.03
5.51	577	3179.27	0.0260309		-0.04
	22166	5.55381
