# Supplementary material for: Interaction Wave Functions and Interaction-Based Coherence and Entanglement in Complex Adaptive Systems
Source: Research Square preprint supplement (doi:10.21203/rs.3.rs-6846233/v1), 2025-06-16
Supplement: Supplementary file 35 [file 30611.xls]

## Sheet: Sheet1
5.69	1775	10099.8	0.0336978		0.05
5.68	2663	15125.8	0.0505563		0.04
5.67	6161	34932.9	0.116965		0.03
5.66	3376	19108.2	0.0640923		0.02
5.65	6217	35126.1	0.118028		0.01
5.64	7523	42429.7	0.142822		0
5.63	8728	49138.6	0.165698		-0.01
5.62	5662	31820.4	0.107491		-0.02
5.61	5173	29020.5	0.0982078		-0.03
5.6	3500	19600	0.0664464		-0.04
5.59	977	5461.43	0.0185481		-0.05
5.58	384	2142.72	0.00729012		-0.06
5.57	260	1448.2	0.00493602		-0.07
5.56	131	728.36	0.002487		-0.08
5.55	71	394.05	0.00134791		-0.09
5.54	14	77.56	0.000265786		-0.1
5.53	59	326.27	0.0011201		-0.11
	52674	5.63809
