# Supplementary material for: Interaction Wave Functions and Interaction-Based Coherence and Entanglement in Complex Adaptive Systems
Source: Research Square preprint supplement (doi:10.21203/rs.3.rs-6846233/v1), 2025-06-16
Supplement: Supplementary file 36 [file 30612.xls]

## Sheet: Sheet1
5.67	263	1491.21	0.0134218		0.04
5.66	446	2524.36	0.0227609		0.03
5.65	1246	7039.9	0.0635876		0.02
5.64	3416	19266.2	0.17433		0.01
5.63	6181	34799	0.315438		0
5.62	4766	26784.9	0.243225		-0.01
5.61	2457	13783.8	0.125389		-0.02
5.6	820	4592	0.0418474		-0.03
	19595	5.62804
