# Supplementary material for: Interaction Wave Functions and Interaction-Based Coherence and Entanglement in Complex Adaptive Systems
Source: Research Square preprint supplement (doi:10.21203/rs.3.rs-6846233/v1), 2025-06-16
Supplement: Supplementary file 37 [file 30613.xls]

## Sheet: Sheet1
5.79	4077	23605.8	0.0580232		0.06
5.78	3424	19790.7	0.0487298		0.05
5.77	3562	20552.7	0.0506938		0.04
5.76	4818	27751.7	0.068569		0.03
5.75	8837	50812.8	0.125767		0.02
5.74	3715	21324.1	0.0528713		0.01
5.73	4430	25383.9	0.063047		0
5.72	5875	33605	0.083612		-0.01
5.71	3285	18757.4	0.0467516		-0.02
5.7	12987	74025.9	0.184829		-0.03
5.69	7681	43704.9	0.109315		-0.04
5.68	6003	34097	0.0854337		-0.05
5.67	1324	7507.08	0.018843		-0.06
5.66	46	260.36	0.000654664		-0.07
5.65	128	723.2	0.00182168		-0.08
5.64	73	411.72	0.00103892		-0.09
	70265	5.72567
