# Supplementary material for: Interaction Wave Functions and Interaction-Based Coherence and Entanglement in Complex Adaptive Systems
Source: Research Square preprint supplement (doi:10.21203/rs.3.rs-6846233/v1), 2025-06-16
Supplement: Supplementary file 38 [file 30616-20.xls]

## Sheet: Sheet1
0.08				20		20	1.6	0.000206426
0.07	57			558		615	43.05	0.0063476
0.06	30			271	17	318	19.08	0.00328217
0.05	154	20	139	104	128	545	27.25	0.00562511
0.04	639	545	1264	463	1640	4551	182.04	0.0469722
0.03	234	557	3725	2437	699	7652	229.56	0.0789786
0.02	1317	4387	1088	2529	375	9696	193.92	0.100075
0.01	5337	3018	2254	4112	762	15483	154.83	0.159805
0	4600	4667	2962	5059	2042	19330	0	0.199511
-0.01	2616	4289	2953	6666	1848	18372	-183.72	0.189623
-0.02	3218	770	1789	1449	2257	9483	-189.66	0.0978769
-0.03	2011		5502		1885	9398	-281.94	0.0969996
-0.04	10		923		491	1424	-56.96	0.0146975
						96887	0.00143518
