# Supplementary material for: Interaction Wave Functions and Interaction-Based Coherence and Entanglement in Complex Adaptive Systems
Source: Research Square preprint supplement (doi:10.21203/rs.3.rs-6846233/v1), 2025-06-16
Supplement: Supplementary file 39 [file 30616.xls]

## Sheet: Sheet1
5.75	57	327.75	0.00281857		0.07
5.74	30	172.2	0.00148346		0.06
5.73	154	882.42	0.00761509		0.05
5.72	639	3655.08	0.0315977		0.04
5.71	234	1336.14	0.011571		0.03
5.7	1317	7506.9	0.0651239		0.02
5.69	5337	30367.5	0.263907		0.01
5.68	4600	26128	0.227464		0
5.67	2616	14832.7	0.129358		-0.01
5.66	3218	18213.9	0.159126		-0.02
5.65	2011	11362.2	0.0994412		-0.03
5.64	10	56.4	0.000494486		-0.04
	20223	5.67874
