# Supplementary material for: Interaction Wave Functions and Interaction-Based Coherence and Entanglement in Complex Adaptive Systems
Source: Research Square preprint supplement (doi:10.21203/rs.3.rs-6846233/v1), 2025-06-16
Supplement: Supplementary file 40 [file 30617.xls]

## Sheet: Sheet1
5.73	20	114.6	0.00109571		0.05
5.72	545	3117.4	0.0298581		0.04
5.71	557	3180.47	0.0305155		0.03
5.7	4387	25005.9	0.240344		0.02
5.69	3018	17172.4	0.165343		0.01
5.68	4667	26508.6	0.255684		0
5.67	4289	24318.6	0.234975		-0.01
5.66	770	4358.2	0.0421848		-0.02
	18253	5.68543
