# Supplementary material for: Interaction Wave Functions and Interaction-Based Coherence and Entanglement in Complex Adaptive Systems
Source: Research Square preprint supplement (doi:10.21203/rs.3.rs-6846233/v1), 2025-06-16
Supplement: Supplementary file 41 [file 30618.xls]

## Sheet: Sheet1
5.72	139	795.08	0.00615071		0.05
5.71	1264	7217.44	0.0559317		0.04
5.7	3725	21232.5	0.16483		0.03
5.69	1088	6190.72	0.0481437		0.02
5.68	2254	12802.7	0.0997389		0.01
5.67	2962	16794.5	0.131068		0
5.66	2953	16714	0.130669		-0.01
5.65	1789	10107.9	0.0791628		-0.02
5.64	5502	31031.3	0.243462		-0.03
5.63	923	5196.49	0.0408425		-0.04
	22599	5.66762
