# Supplementary material for: Interaction Wave Functions and Interaction-Based Coherence and Entanglement in Complex Adaptive Systems
Source: Research Square preprint supplement (doi:10.21203/rs.3.rs-6846233/v1), 2025-06-16
Supplement: Supplementary file 42 [file 30619.xls]

## Sheet: Sheet1
5.65	20	113	0.000845023		0.08
5.64	558	3147.12	0.0235761		0.07
5.63	271	1525.73	0.0114501		0.06
5.62	104	584.48	0.00439412		0.05
5.61	463	2597.43	0.0195623		0.04
5.6	2437	13647.2	0.102966		0.03
5.59	2529	14137.1	0.106853		0.02
5.58	4112	22945	0.173737		0.01
5.57	5059	28178.6	0.213749		0
5.56	6666	37063	0.281646		-0.01
5.55	1449	8041.95	0.0612219		-0.02
	23668	5.57633
