# Supplementary material for: Interaction Wave Functions and Interaction-Based Coherence and Entanglement in Complex Adaptive Systems
Source: Research Square preprint supplement (doi:10.21203/rs.3.rs-6846233/v1), 2025-06-16
Supplement: Supplementary file 43 [file 30620.xls]

## Sheet: Sheet1
5.63	17	95.71	0.00139987		0.06
5.62	128	719.36	0.0105402		0.05
5.61	1640	9200.4	0.135046		0.04
5.6	699	3914.4	0.0575593		0.03
5.59	375	2096.25	0.0308794		0.02
5.58	762	4251.96	0.062747		0.01
5.57	2042	11373.9	0.168149		0
5.56	1848	10274.9	0.152174		-0.01
5.55	2257	12526.4	0.185853		-0.02
5.54	1885	10442.9	0.155221		-0.03
5.53	491	2715.23	0.0404315		-0.04
	12144	5.56747
