# Supplementary material for: Interaction Wave Functions and Interaction-Based Coherence and Entanglement in Complex Adaptive Systems
Source: Research Square preprint supplement (doi:10.21203/rs.3.rs-6846233/v1), 2025-06-16
Supplement: Supplementary file 44 [file 30623-27.xls]

## Sheet: Sheet1
0.08			29		29	2.32	0.000296448
0.07			361		361	25.27	0.00369026
0.06		1806	1369	54	3229	193.74	0.0330079
0.05	50	1191	47	60	1348	67.4	0.0137797
0.04	1957	3983	1263	1602	8805	352.2	0.0900077
0.03	2362	2387	4262	1096	10107	303.21	0.103317
0.02	2122	2980	2397	1201	8700	174	0.0889343
0.01	1597	6214	1134	1161	10106	101.06	0.103307
0	3569	5157	1231	383	10340	0	0.105699
-0.01	2541	4240	2487	1379	10647	-106.47	0.108837
-0.02	2060	3734	3424	1596	10814	-216.28	0.110544
-0.03	4640	1089	6381	2218	14328	-429.84	0.146466
-0.04	315	635	1460	1331	3741	-149.64	0.0382418
-0.05		35	11	23	69	-3.45	0.000705341
-0.06		1969			1969	-118.14	0.0201278
-0.07		2166			2166	-151.62	0.0221416
-0.08		450			450	-36	0.00460005
-0.09		584			584	-52.56	0.00596984
-0.1		32			32	-3.2	0.000327115
					97825	-0.000490672
