# Supplementary material for: Interaction Wave Functions and Interaction-Based Coherence and Entanglement in Complex Adaptive Systems
Source: Research Square preprint supplement (doi:10.21203/rs.3.rs-6846233/v1), 2025-06-16
Supplement: Supplementary file 45 [file 30623.xls]

## Sheet: Sheet1
5.59	50	279.5	0.00235705		0.05
5.58	1957	10920.1	0.0922547		0.04
5.57	2362	13156.3	0.111347		0.03
5.56	2122	11798.3	0.100033		0.02
5.55	1597	8863.35	0.075284		0.01
5.54	3569	19772.3	0.168246		0
5.53	2541	14051.7	0.119785		-0.01
5.52	2060	11371.2	0.0971103		-0.02
5.51	4640	25566.4	0.218734		-0.03
5.5	315	1732.5	0.0148494		-0.04
	21213	5.53961
