# Supplementary material for: Interaction Wave Functions and Interaction-Based Coherence and Entanglement in Complex Adaptive Systems
Source: Research Square preprint supplement (doi:10.21203/rs.3.rs-6846233/v1), 2025-06-16
Supplement: Supplementary file 46 [file 30624.xls]

## Sheet: Sheet1
5.7	1806	10294.2	0.0467246		0.06
5.69	1191	6776.79	0.0308134		0.05
5.68	3983	22623.4	0.103048		0.04
5.67	2387	13534.3	0.0617562		0.03
5.66	2980	16866.8	0.0770982		0.02
5.65	6214	35109.1	0.160768		0.01
5.64	5157	29085.5	0.133421		0
5.63	4240	23871.2	0.109697		-0.01
5.62	3734	20985.1	0.0966056		-0.02
5.61	1089	6109.29	0.0281745		-0.03
5.6	635	3556	0.0164286		-0.04
5.59	35	195.65	0.000905516		-0.05
5.58	1969	10987	0.0509417		-0.06
5.57	2166	12064.6	0.0560385		-0.07
5.56	450	2502	0.0116423		-0.08
5.55	584	3241.2	0.0151092		-0.09
5.54	32	177.28	0.0008279		-0.1
	38652	5.63954
