# Supplementary material for: Interaction Wave Functions and Interaction-Based Coherence and Entanglement in Complex Adaptive Systems
Source: Research Square preprint supplement (doi:10.21203/rs.3.rs-6846233/v1), 2025-06-16
Supplement: Supplementary file 47 [file 30626.xls]

## Sheet: Sheet1
5.64	29	163.56	0.0011216		0.08
5.63	361	2032.43	0.0139619		0.07
5.62	1369	7693.78	0.0529471		0.06
5.61	47	263.67	0.00181776		0.05
5.6	1263	7072.8	0.0488475		0.04
5.59	4262	23824.6	0.164836		0.03
5.58	2397	13375.3	0.0927058		0.02
5.57	1134	6316.38	0.0438583		0.01
5.56	1231	6844.36	0.0476098		0
5.55	2487	13802.9	0.0961866		-0.01
5.54	3424	18969	0.132426		-0.02
5.53	6381	35286.9	0.24679		-0.03
5.52	1460	8059.2	0.0564666		-0.04
5.51	11	60.61	0.000425433		-0.05
	25856	5.56023
