# Supplementary material for: Interaction Wave Functions and Interaction-Based Coherence and Entanglement in Complex Adaptive Systems
Source: Research Square preprint supplement (doi:10.21203/rs.3.rs-6846233/v1), 2025-06-16
Supplement: Supplementary file 48 [file 30627.xls]

## Sheet: Sheet1
5.62	54	303.48	0.00446134		0.06
5.61	60	336.6	0.00495704		0.05
5.6	1602	8971.2	0.132353		0.04
5.59	1096	6126.64	0.0905486		0.03
5.58	1201	6701.58	0.0992234		0.02
5.57	1161	6466.77	0.0959187		0.01
5.56	383	2129.48	0.0316424		0
5.55	1379	7653.45	0.113929		-0.01
5.54	1596	8841.84	0.131857		-0.02
5.53	2218	12265.5	0.183245		-0.03
5.52	1331	7347.12	0.109964		-0.04
5.51	23	126.73	0.0019002		-0.05
	12104	5.5577
