# Supplementary material for: Interaction Wave Functions and Interaction-Based Coherence and Entanglement in Complex Adaptive Systems
Source: Research Square preprint supplement (doi:10.21203/rs.3.rs-6846233/v1), 2025-06-16
Supplement: Supplementary file 49 [file 30630.xls]

## Sheet: Sheet1
5.57	53	295.21	0.00387484		0.05
5.56	277	1540.12	0.0202515		0.04
5.55	735	4079.25	0.0537359		0.03
5.54	548	3035.92	0.0400643		0.02
5.53	1367	7559.51	0.0999415		0.01
5.52	3942	21759.8	0.2882		0
5.51	4948	27263.5	0.361749		-0.01
5.5	1808	9944	0.132183		-0.02
	13678	5.51816
