# Supplementary material for: Interaction Wave Functions and Interaction-Based Coherence and Entanglement in Complex Adaptive Systems
Source: Research Square preprint supplement (doi:10.21203/rs.3.rs-6846233/v1), 2025-06-16
Supplement: Supplementary file 50 [file 30602-06.xls]

## Sheet: Sheet1
0.16			316			316	50.56	0.0010381
0.15			394			394	59.1	0.00129434
0.14			2024			2024	283.36	0.00664908
0.13			2196			2196	285.48	0.00721412
0.12			4111			4111	493.32	0.0135051
0.11			3825			3825	420.75	0.0125656
0.1			3675			3675	367.5	0.0120728
0.09			5446		160	5606	504.54	0.0184164
0.08	235	4316	4143	510	418	9622	769.76	0.0316094
0.07	624	2520	4764	1945	98	9951	696.57	0.0326902
0.06	1608	2861	2292	3917	761	11439	686.34	0.0375785
0.05	901	2691	1843	5574	2293	13302	665.1	0.0436986
0.04	2576	3762	1090	4087	2119	13634	545.36	0.0447893
0.03	4918	1570	259	4548	3754	15049	451.47	0.0494378
0.02	5376	936	3135	4001	4775	18223	364.46	0.0598647
0.01	6666	944	4713	3006	5484	20813	208.13	0.0683732
0	4777	1492	2413	3562	5611	17855	0	0.0586558
-0.01	7660	12715	698	2520	7752	31345	-313.45	0.102972
-0.02	21111	4974	1033	2123	4133	33374	-667.48	0.109638
-0.03	3217	3818	1842	2771	4214	15862	-475.86	0.0521086
-0.04	1886	1662	1358	1688	8666	15260	-610.4	0.0501309
-0.05	608	4128	3758	447	654	9595	-479.75	0.0315207
-0.06		4086	4539	1760		10385	-623.1	0.034116
-0.07		376	5095	305		5776	-404.32	0.0189748
-0.08		110	5428	800		6338	-507.04	0.0208211
-0.09		490	2912	1794		5196	-467.64	0.0170695
-0.1		272	3107	1178		4557	-455.7	0.0149703
-0.11			3373	3639		7012	-771.32	0.0230353
-0.12			3354	1407		4761	-571.32	0.0156405
-0.13			2907			2907	-377.91	0.00954984
						304403	0.0004156
