# Supplementary material for: Interaction Wave Functions and Interaction-Based Coherence and Entanglement in Complex Adaptive Systems
Source: Research Square preprint supplement (doi:10.21203/rs.3.rs-6846233/v1), 2025-06-16
Supplement: Supplementary file 51 [file 30602.xls]

## Sheet: Sheet1
5.7	235	1339.5	0.00378038		0.08
5.69	624	3550.56	0.0100381		0.07
5.68	1608	9133.44	0.0258675		0.06
5.67	901	5108.67	0.0144942		0.05
5.66	2576	14580.2	0.0414394		0.04
5.65	4918	27786.7	0.0791146		0.03
5.64	5376	30320.6	0.0864823		0.02
5.63	6666	37529.6	0.107234		0.01
5.62	4777	26846.7	0.0768464		0
5.61	7660	42972.6	0.123224		-0.01
5.6	21111	118222	0.339607		-0.02
5.59	3217	17983	0.051751		-0.03
5.58	1886	10523.9	0.0303396		-0.04
5.57	608	3386.56	0.00978074		-0.05
	62163	5.61884
