# Supplementary material for: Interaction Wave Functions and Interaction-Based Coherence and Entanglement in Complex Adaptive Systems
Source: Research Square preprint supplement (doi:10.21203/rs.3.rs-6846233/v1), 2025-06-16
Supplement: Supplementary file 52 [file 30603.xls]

## Sheet: Sheet1
5.79	4316	24989.6	0.080338		0.08
5.78	2520	14565.6	0.0469073		0.07
5.77	2861	16508	0.0532547		0.06
5.76	2691	15500.2	0.0500903		0.05
5.75	3762	21631.5	0.0700259		0.04
5.74	1570	9011.8	0.029224		0.03
5.73	936	5363.28	0.0174227		0.02
5.72	944	5399.68	0.0175716		0.01
5.71	1492	8519.32	0.0277721		0
5.7	12715	72475.5	0.236677		-0.01
5.69	4974	28302.1	0.092586		-0.02
5.68	3818	21686.2	0.0710683		-0.03
5.67	1662	9423.54	0.0309365		-0.04
5.66	4128	23364.5	0.0768386		-0.05
5.65	4086	23085.9	0.0760568		-0.06
5.64	376	2120.64	0.00699886		-0.07
5.63	110	619.3	0.00204754		-0.08
5.62	490	2753.8	0.00912086		-0.09
5.61	272	1525.92	0.00506301		-0.1
	53723	5.71164
