# Supplementary material for: Interaction Wave Functions and Interaction-Based Coherence and Entanglement in Complex Adaptive Systems
Source: Research Square preprint supplement (doi:10.21203/rs.3.rs-6846233/v1), 2025-06-16
Supplement: Supplementary file 53 [file 30604.xls]

## Sheet: Sheet1
5.84	316	1845.44	0.00367258		0.16
5.83	394	2297.02	0.00457911		0.15
5.82	2024	11779.7	0.0235231		0.14
5.81	2196	12758.8	0.0255221		0.13
5.8	4111	23843.8	0.0477784		0.12
5.79	3825	22146.8	0.0444545		0.11
5.78	3675	21241.5	0.0427112		0.1
5.77	5446	31423.4	0.0632939		0.09
5.76	4143	23863.7	0.0481503		0.08
5.75	4764	27393	0.0553677		0.07
5.74	2292	13156.1	0.0266378		0.06
5.73	1843	10560.4	0.0214195		0.05
5.72	1090	6234.8	0.0126681		0.04
5.71	259	1478.89	0.00301012		0.03
5.7	3135	17869.5	0.0364353		0.02
5.69	4713	26817	0.0547749		0.01
5.68	2413	13705.8	0.0280441		0
5.67	698	3957.66	0.00811222		-0.01
5.66	1033	5846.78	0.0120056		-0.02
5.65	1842	10407.3	0.0214079		-0.03
5.64	1358	7659.12	0.0157828		-0.04
5.63	3758	21157.5	0.0436758		-0.05
5.62	4539	25509.2	0.0527527		-0.06
5.61	5095	28583	0.0592146		-0.07
5.6	5428	30396.8	0.0630847		-0.08
5.59	2912	16278.1	0.0338435		-0.09
5.58	3107	17337.1	0.0361099		-0.1
5.57	3373	18787.6	0.0392013		-0.11
5.56	3354	18648.2	0.0389805		-0.12
5.55	2907	16133.9	0.0337854		-0.13
	86043	5.68457
