# Supplementary material for: Interaction Wave Functions and Interaction-Based Coherence and Entanglement in Complex Adaptive Systems
Source: Research Square preprint supplement (doi:10.21203/rs.3.rs-6846233/v1), 2025-06-16
Supplement: Supplementary file 54 [file 30605.xls]

## Sheet: Sheet1
5.83	510	2973.3	0.00988717		0.08
5.82	1945	11319.9	0.037707		0.07
5.81	3917	22757.8	0.0759373		0.06
5.8	5574	32329.2	0.108061		0.05
5.79	4087	23663.7	0.0792331		0.04
5.78	4548	26287.4	0.0881703		0.03
5.77	4001	23085.8	0.0775658		0.02
5.76	3006	17314.6	0.0582761		0.01
5.75	3562	20481.5	0.0690551		0
5.74	2520	14464.8	0.0488543		-0.01
5.73	2123	12164.8	0.0411578		-0.02
5.72	2771	15850.1	0.0537203		-0.03
5.71	1688	9638.48	0.0327246		-0.04
5.7	447	2547.9	0.00866581		-0.05
5.69	1760	10014.4	0.0341204		-0.06
5.68	305	1732.4	0.00591292		-0.07
5.67	800	4536	0.0155093		-0.08
5.66	1794	10154	0.0347796		-0.09
5.65	1178	6655.7	0.0228374		-0.1
5.64	3639	20524	0.0705479		-0.11
5.63	1407	7921.41	0.027277		-0.12
	51582	5.74652
