# Supplementary material for: Interaction Wave Functions and Interaction-Based Coherence and Entanglement in Complex Adaptive Systems
Source: Research Square preprint supplement (doi:10.21203/rs.3.rs-6846233/v1), 2025-06-16
Supplement: Supplementary file 55 [file 30606.xls]

## Sheet: Sheet1
5.68	160	908.8	0.00314391		0.09
5.67	418	2370.06	0.00821347		0.08
5.66	98	554.68	0.00192565		0.07
5.65	761	4299.65	0.0149532		0.06
5.64	2293	12932.5	0.0450562		0.05
5.63	2119	11930	0.0416372		0.04
5.62	3754	21097.5	0.073764		0.03
5.61	4775	26787.8	0.0938261		0.02
5.6	5484	30710.4	0.107758		0.01
5.59	5611	31365.5	0.110253		0
5.58	7752	43256.2	0.152323		-0.01
5.57	4133	23020.8	0.0812112		-0.02
5.56	4214	23429.8	0.0828028		-0.03
5.55	8666	48096.3	0.170282		-0.04
5.54	654	3623.16	0.0128507		-0.05
	50892	5.58797
