# Supplementary material for: Interaction Wave Functions and Interaction-Based Coherence and Entanglement in Complex Adaptive Systems
Source: Research Square preprint supplement (doi:10.21203/rs.3.rs-6846233/v1), 2025-06-16
Supplement: Supplementary file 56 [file 30609-13.xls]

## Sheet: Sheet1
0.12	240					240	28.8	0.000910384
0.11	919					919	101.09	0.00348601
0.1	1085					1085	108.5	0.00411569
0.09	1088					1088	97.92	0.00412707
0.08	859			1148	145	2152	172.16	0.00816311
0.07	578	1290	381	771	411	3431	240.17	0.0130147
0.06	1637	1304	3694	1419	769	8823	529.38	0.033468
0.05	1535	2353	5084	2006	2352	13330	666.5	0.0505642
0.04	1263	4945	4435	2244	2620	15507	620.28	0.0588222
0.03	3547	3244	16022	829	2204	25846	775.38	0.0980408
0.02	799	2115	7900	644	4397	15855	317.1	0.0601422
0.01	2567	2973	12948	1014	4132	23634	236.34	0.0896501
0	4724	4228	16238	4018	4149	33357	0	0.126532
-0.01	5659	6728	9278	6382	1931	29978	-299.78	0.113715
-0.02	2186	3358	8253	7733	3189	24719	-494.38	0.0937658
-0.03	6732	2116	4631	3327	1632	18438	-553.14	0.0699403
-0.04	8244	802	2314	1385	4110	16855	-674.2	0.0639355
-0.05	1841	1982	1196		913	5932	-296.6	0.0225017
-0.06	579	4926	1845		576	7926	-475.56	0.0300654
-0.07	265	862	3770		55	4952	-346.64	0.0187843
-0.08	0	0	5944		0	5944	-475.52	0.0225472
-0.09	717	0	1385		676	2778	-250.02	0.0105377
-0.1		0	577			577	-57.7	0.00218872
-0.11		259				259	-28.49	0.000982456
						263625	-0.000221565
