# Supplementary material for: Interaction Wave Functions and Interaction-Based Coherence and Entanglement in Complex Adaptive Systems
Source: Research Square preprint supplement (doi:10.21203/rs.3.rs-6846233/v1), 2025-06-16
Supplement: Supplementary file 57 [file 30609.xls]

## Sheet: Sheet1
5.71	240	1370.4	0.00509944		0.12
5.7	919	5238.3	0.0195266		0.11
5.69	1085	6173.65	0.0230537		0.1
5.68	1088	6179.84	0.0231175		0.09
5.67	859	4870.53	0.0182517		0.08
5.66	578	3271.48	0.0122811		0.07
5.65	1637	9249.05	0.0347824		0.06
5.64	1535	8657.4	0.0326152		0.05
5.63	1263	7110.69	0.0268358		0.04
5.62	3547	19934.1	0.0753655		0.03
5.61	799	4482.39	0.0169769		0.02
5.6	2567	14375.2	0.0545428		0.01
5.59	4724	26407.2	0.100374		0
5.58	5659	31577.2	0.120241		-0.01
5.57	2186	12176	0.0464474		-0.02
5.56	6732	37429.9	0.143039		-0.03
5.55	8244	45754.2	0.175166		-0.04
5.54	1841	10199.1	0.0391169		-0.05
5.53	579	3201.87	0.0123024		-0.06
5.52	265	1462.8	0.00563063		-0.07
5.51	0	0	0		-0.08
5.5	717	3943.5	0.0152346		-0.09
	47064	5.58951
