# Supplementary material for: Interaction Wave Functions and Interaction-Based Coherence and Entanglement in Complex Adaptive Systems
Source: Research Square preprint supplement (doi:10.21203/rs.3.rs-6846233/v1), 2025-06-16
Supplement: Supplementary file 58 [file 30610.xls]

## Sheet: Sheet1
5.68	1290	7327.2	0.0296654		0.07
5.67	1304	7393.68	0.0299874		0.06
5.66	2353	13318	0.0541106		0.05
5.65	4945	27939.2	0.113717		0.04
5.64	3244	18296.2	0.0746004		0.03
5.63	2115	11907.5	0.0486375		0.02
5.62	2973	16708.3	0.0683684		0.01
5.61	4228	23719.1	0.0972289		0
5.6	6728	37676.8	0.15472		-0.01
5.59	3358	18771.2	0.077222		-0.02
5.58	2116	11807.3	0.0486605		-0.03
5.57	802	4467.14	0.0184431		-0.04
5.56	1982	11019.9	0.0455789		-0.05
5.55	4926	27339.3	0.11328		-0.06
5.54	862	4775.48	0.0198229		-0.07
5.53	0	0	0		-0.08
5.52	0	0	0		-0.09
5.51	0	0	0		-0.1
5.5	259	1424.5	0.00595608		-0.11
	43485	5.60862
