# Supplementary material for: Interaction Wave Functions and Interaction-Based Coherence and Entanglement in Complex Adaptive Systems
Source: Research Square preprint supplement (doi:10.21203/rs.3.rs-6846233/v1), 2025-06-16
Supplement: Supplementary file 59 [file 30611.xls]

## Sheet: Sheet1
5.84	381	2225.04	0.0035979		0.07
5.83	3694	21536	0.0348836		0.06
5.82	5084	29588.9	0.0480098		0.05
5.81	4435	25767.4	0.0418811		0.04
5.8	16022	92927.6	0.151301		0.03
5.79	7900	45741	0.0746022		0.02
5.78	12948	74839.4	0.122272		0.01
5.77	16238	93693.3	0.153341		0
5.76	9278	53441.3	0.0876151		-0.01
5.75	8253	47454.8	0.0779357		-0.02
5.74	4631	26581.9	0.043732		-0.03
5.73	2314	13259.2	0.0218518		-0.04
5.72	1196	6841.12	0.0112942		-0.05
5.71	1845	10535	0.0174229		-0.06
5.7	3770	21489	0.0356013		-0.07
5.69	5944	33821.4	0.0561311		-0.08
5.68	1385	7866.8	0.013079		-0.09
5.67	577	3271.59	0.00544879		-0.1
	105895	5.76874
