# Supplementary material for: Interaction Wave Functions and Interaction-Based Coherence and Entanglement in Complex Adaptive Systems
Source: Research Square preprint supplement (doi:10.21203/rs.3.rs-6846233/v1), 2025-06-16
Supplement: Supplementary file 60 [file 30612.xls]

## Sheet: Sheet1
5.8	1148	6658.4	0.0348724		0.08
5.79	771	4464.09	0.0234204		0.07
5.78	1419	8201.82	0.0431045		0.06
5.77	2006	11574.6	0.0609356		0.05
5.76	2244	12925.4	0.0681652		0.04
5.75	829	4766.75	0.0251823		0.03
5.74	644	3696.56	0.0195626		0.02
5.73	1014	5810.22	0.0308019		0.01
5.72	4018	22983	0.122053		0
5.71	6382	36441.2	0.193864		-0.01
5.7	7733	44078.1	0.234903		-0.02
5.69	3327	18930.6	0.101063		-0.03
5.68	1385	7866.8	0.0420717		-0.04
	32920	5.72289
