# Supplementary material for: Interaction Wave Functions and Interaction-Based Coherence and Entanglement in Complex Adaptive Systems
Source: Research Square preprint supplement (doi:10.21203/rs.3.rs-6846233/v1), 2025-06-16
Supplement: Supplementary file 61 [file 30613.xls]

## Sheet: Sheet1
5.82	145	843.9	0.00423222		0.08
5.81	411	2387.91	0.0119961		0.07
5.8	769	4460.2	0.0224453		0.06
5.79	2352	13618.1	0.0686495		0.05
5.78	2620	15143.6	0.0764718		0.04
5.77	2204	12717.1	0.0643297		0.03
5.76	4397	25326.7	0.128338		0.02
5.75	4132	23759	0.120604		0.01
5.74	4149	23815.3	0.1211		0
5.73	1931	11064.6	0.0563615		-0.01
5.72	3189	18241.1	0.0930796		-0.02
5.71	1632	9318.72	0.0476343		-0.03
5.7	4110	23427	0.119961		-0.04
5.69	913	5194.97	0.0266484		-0.05
5.68	576	3271.68	0.0168121		-0.06
5.67	55	311.85	0.00160532		-0.07
5.66	0	0	0		-0.08
5.65	676	3819.4	0.0197309		-0.09
	34261	5.74184
