# Supplementary material for: Interaction Wave Functions and Interaction-Based Coherence and Entanglement in Complex Adaptive Systems
Source: Research Square preprint supplement (doi:10.21203/rs.3.rs-6846233/v1), 2025-06-16
Supplement: Supplementary file 62 [file 30616-20.xls]

## Sheet: Sheet1
0.14				40		40	5.6	0.000228598
0.13				224		224	29.12	0.00128015
0.12	70			271		341	40.92	0.00194879
0.11	0			509		509	55.99	0.0029089
0.1	0			512		512	51.2	0.00292605
0.09	0			2751		2751	247.59	0.0157218
0.08	222	372		1290		1884	150.72	0.0107669
0.07	1112	442		1481		3035	212.45	0.0173448
0.06	779	1235	76	2464		4554	273.24	0.0260258
0.05	1095	352	480	294	1223	3444	172.2	0.0196822
0.04	1586	1446	653	1300	4254	9239	369.56	0.0528003
0.03	2401	2095	1263	3392	1079	10230	306.9	0.0584638
0.02	921	2226	2848	3410	2861	12266	245.32	0.0700994
0.01	2737	2540	3684	3703	2322	14986	149.86	0.0856441
2.42861e-17	3442	2040	2442	5542	4074	17540	4.25979e-13	0.10024
-0.01	2803	4307	2120	3892	5966	19088	-190.88	0.109087
-0.02	7456	9457	772	8960	756	27401	-548.02	0.156595
-0.03	6383	5266	4534	2159	2453	20795	-623.85	0.118842
-0.04	2257	288	1147	5636	954	10282	-411.28	0.058761
-0.05				3923	1805	5728	-286.4	0.0327352
-0.06				2954	2752	5706	-342.36	0.0326094
-0.07				514		514	-35.98	0.00293748
-0.08				604		604	-48.32	0.00345182
-0.09				2522		2522	-226.98	0.0144131
-0.1				585		585	-58.5	0.00334324
-0.11				200		200	-22	0.00114299
						174980	-0.00276546
