# Supplementary material for: Interaction Wave Functions and Interaction-Based Coherence and Entanglement in Complex Adaptive Systems
Source: Research Square preprint supplement (doi:10.21203/rs.3.rs-6846233/v1), 2025-06-16
Supplement: Supplementary file 63 [file 30616.xls]

## Sheet: Sheet1
5.74	70	401.8	0.00210438		0.12
5.73	0	0	0		0.11
5.72	0	0	0		0.1
5.71	0	0	0		0.09
5.7	222	1265.4	0.00667388		0.08
5.69	1112	6327.28	0.0334295		0.07
5.68	779	4424.72	0.0234187		0.06
5.67	1095	6208.65	0.0329185		0.05
5.66	1586	8976.76	0.0476792		0.04
5.65	2401	13565.7	0.0721801		0.03
5.64	921	5194.44	0.0276876		0.02
5.63	2737	15409.3	0.0822811		0.01
5.62	3442	19344	0.103475		0
5.61	2803	15724.8	0.0842653		-0.01
5.6	7456	41753.6	0.224146		-0.02
5.59	6383	35681	0.191889		-0.03
5.58	2257	12594.1	0.0678511		-0.04
	33264	5.61783
