# Supplementary material for: Interaction Wave Functions and Interaction-Based Coherence and Entanglement in Complex Adaptive Systems
Source: Research Square preprint supplement (doi:10.21203/rs.3.rs-6846233/v1), 2025-06-16
Supplement: Supplementary file 64 [file 30617.xls]

## Sheet: Sheet1
5.65	372	2101.8	0.0116011		0.08
5.64	442	2492.88	0.0137841		0.07
5.63	1235	6953.05	0.0385143		0.06
5.62	352	1978.24	0.0109774		0.05
5.61	1446	8112.06	0.0450945		0.04
5.6	2095	11732	0.065334		0.03
5.59	2226	12443.3	0.0694193		0.02
5.58	2540	14173.2	0.0792116		0.01
5.57	2040	11362.8	0.0636188		0
5.56	4307	23946.9	0.134317		-0.01
5.55	9457	52486.4	0.294923		-0.02
5.54	5266	29173.6	0.164224		-0.03
5.53	288	1592.64	0.00898148		-0.04
	32066	5.56817
