# Supplementary material for: Interaction Wave Functions and Interaction-Based Coherence and Entanglement in Complex Adaptive Systems
Source: Research Square preprint supplement (doi:10.21203/rs.3.rs-6846233/v1), 2025-06-16
Supplement: Supplementary file 65 [file 30618.xls]

## Sheet: Sheet1
5.65	76	429.4	0.00379639		0.06
5.64	480	2707.2	0.0239772		0.05
5.63	653	3676.39	0.032619		0.04
5.62	1263	7098.06	0.0630901		0.03
5.61	2848	15977.3	0.142265		0.02
5.6	3684	20630.4	0.184025		0.01
5.59	2442	13650.8	0.121984		0
5.58	2120	11829.6	0.105899		-0.01
5.57	772	4300.04	0.0385634		-0.02
5.56	4534	25209	0.226485		-0.03
5.55	1147	6365.85	0.0572956		-0.04
	20019	5.58839
