# Supplementary material for: Interaction Wave Functions and Interaction-Based Coherence and Entanglement in Complex Adaptive Systems
Source: Research Square preprint supplement (doi:10.21203/rs.3.rs-6846233/v1), 2025-06-16
Supplement: Supplementary file 66 [file 30619.xls]

## Sheet: Sheet1
5.58	40	223.2	0.000676453		0.14
5.57	224	1247.68	0.00378814		0.13
5.56	271	1506.76	0.00458297		0.12
5.55	509	2824.95	0.00860786		0.11
5.54	512	2836.48	0.00865859		0.1
5.53	2751	15213	0.046523		0.09
5.52	1290	7120.8	0.0218156		0.08
5.51	1481	8160.31	0.0250457		0.07
5.5	2464	13552	0.0416695		0.06
5.49	294	1614.06	0.00497193		0.05
5.48	1300	7124	0.0219847		0.04
5.47	3392	18554.2	0.0573632		0.03
5.46	3410	18618.6	0.0576676		0.02
5.45	3703	20181.4	0.0626226		0.01
5.44	5542	30148.5	0.0937225		0
5.43	3892	21133.6	0.0658188		-0.01
5.42	8960	48563.2	0.151525		-0.02
5.41	2159	11680.2	0.0365115		-0.03
5.4	5636	30434.4	0.0953122		-0.04
5.39	3923	21145	0.0663431		-0.05
5.38	2954	15892.5	0.049956		-0.06
5.37	514	2760.18	0.00869242		-0.07
5.36	604	3237.44	0.0102144		-0.08
5.35	2522	13492.7	0.0426503		-0.09
5.34	585	3123.9	0.00989312		-0.1
5.33	200	1066	0.00338226		-0.11
	59132	5.43623
