# Supplementary material for: Interaction Wave Functions and Interaction-Based Coherence and Entanglement in Complex Adaptive Systems
Source: Research Square preprint supplement (doi:10.21203/rs.3.rs-6846233/v1), 2025-06-16
Supplement: Supplementary file 67 [file 30620.xls]

## Sheet: Sheet1
5.46	1223	6677.58	0.0400997		0.05
5.45	4254	23184.3	0.13948		0.04
5.44	1079	5869.76	0.0353782		0.03
5.43	2861	15535.2	0.0938064		0.02
5.42	2322	12585.2	0.0761336		0.01
5.41	4074	22040.3	0.133578		0
5.4	5966	32216.4	0.195613		-0.01
5.39	756	4074.84	0.0247877		-0.02
5.38	2453	13197.1	0.0804289		-0.03
5.37	954	5122.98	0.0312797		-0.04
5.36	1805	9674.8	0.0591823		-0.05
5.35	2752	14723.2	0.0902325		-0.06
	30499	5.40679
