# Supplementary material for: Interaction Wave Functions and Interaction-Based Coherence and Entanglement in Complex Adaptive Systems
Source: Research Square preprint supplement (doi:10.21203/rs.3.rs-6846233/v1), 2025-06-16
Supplement: Supplementary file 68 [file 30623-27.xls]

## Sheet: Sheet1
0.11				200		200	22	0.00130695
0.1	1			986		987	98.7	0.0064498
0.09	493			1741	1263	3497	314.73	0.022852
0.08	460			485	2729	3674	293.92	0.0240087
0.07	302		8	481	1115	1906	133.42	0.0124552
0.06	476		287	2374	2419	5556	333.36	0.0363071
0.05	978	200	297	1291	6239	9005	450.25	0.0588454
0.04	1350	1030	545	3717	5438	12080	483.2	0.0789398
0.03	3279	1124	2269	1657	3931	12260	367.8	0.0801161
0.02	2446	3720	1663	1266	1406	10501	210.02	0.0686214
0.01	1950	3563	1823	3774	2824	13934	139.34	0.0910552
0	5210	2409	1714	1327	1306	11966	0	0.0781948
-0.01	4394	4419	565	1396	9440	20214	-202.14	0.132093
-0.02	1596	1620	1248	548	1623	6635	-132.7	0.0433581
-0.03	789	1482	2781	2026	1746	8824	-264.72	0.0576626
-0.04	5315	232	2439	1824	422	10232	-409.28	0.0668636
-0.05	434	870		803	1162	3269	-163.45	0.0213621
-0.06		34		601	2709	3344	-200.64	0.0218522
-0.07				1304	4940	6244	-437.08	0.040803
-0.08				901	1397	2298	-183.84	0.0150169
-0.09				2529	1091	3620	-325.8	0.0236558
-0.1				560	1205	1765	-176.5	0.0115338
-0.11				475		475	-52.25	0.00310401
-0.12				542		542	-65.04	0.00354184
						153028	0.00152456
