# Supplementary material for: Interaction Wave Functions and Interaction-Based Coherence and Entanglement in Complex Adaptive Systems
Source: Research Square preprint supplement (doi:10.21203/rs.3.rs-6846233/v1), 2025-06-16
Supplement: Supplementary file 69 [file 30623.xls]

## Sheet: Sheet1
5.4	1	5.4	3.39294e-05		0.1
5.39	493	2657.27	0.0167272		0.09
5.38	460	2474.8	0.0156075		0.08
5.37	302	1621.74	0.0102467		0.07
5.36	476	2551.36	0.0161504		0.06
5.35	978	5232.3	0.0331829		0.05
5.34	1350	7209	0.0458046		0.04
5.33	3279	17477.1	0.111254		0.03
5.32	2446	13012.7	0.0829912		0.02
5.31	1950	10354.5	0.0661623		0.01
5.3	5210	27613	0.176772		0
5.29	4394	23244.3	0.149086		-0.01
5.28	1596	8426.88	0.0541513		-0.02
5.27	789	4158.03	0.0267703		-0.03
5.26	5315	27956.9	0.180335		-0.04
5.25	434	2278.5	0.0147253		-0.05
	29473	5.30227
