# Supplementary material for: Interaction Wave Functions and Interaction-Based Coherence and Entanglement in Complex Adaptive Systems
Source: Research Square preprint supplement (doi:10.21203/rs.3.rs-6846233/v1), 2025-06-16
Supplement: Supplementary file 70 [file 30624.xls]

## Sheet: Sheet1
5.36	200	1072	0.00966044		0.05
5.35	1030	5510.5	0.0497512		0.04
5.34	1124	6002.16	0.0542916		0.03
5.33	3720	19827.6	0.179684		0.02
5.32	3563	18955.2	0.172101		0.01
5.31	2409	12791.8	0.11636		0
5.3	4419	23420.7	0.213447		-0.01
5.29	1620	8569.8	0.0782495		-0.02
5.28	1482	7824.96	0.0715838		-0.03
5.27	232	1222.64	0.0112061		-0.04
5.26	870	4576.2	0.0420229		-0.05
5.25	34	178.5	0.00164227		-0.06
	20703	5.31092
