# Supplementary material for: Interaction Wave Functions and Interaction-Based Coherence and Entanglement in Complex Adaptive Systems
Source: Research Square preprint supplement (doi:10.21203/rs.3.rs-6846233/v1), 2025-06-16
Supplement: Supplementary file 71 [file 30625.xls]

## Sheet: Sheet1
5.37	8	42.96	0.000511542		0.07
5.36	287	1538.32	0.0183516		0.06
5.35	297	1588.95	0.018991		0.05
5.34	545	2910.3	0.0348488		0.04
5.33	2269	12093.8	0.145086		0.03
5.32	1663	8847.16	0.106337		0.02
5.31	1823	9680.13	0.116568		0.01
5.3	1714	9084.2	0.109598		0
5.29	565	2988.85	0.0361276		-0.01
5.28	1248	6589.44	0.0798005		-0.02
5.27	2781	14655.9	0.177825		-0.03
5.26	2439	12829.1	0.155956		-0.04
	15639	5.2976
