# Supplementary material for: Interaction Wave Functions and Interaction-Based Coherence and Entanglement in Complex Adaptive Systems
Source: Research Square preprint supplement (doi:10.21203/rs.3.rs-6846233/v1), 2025-06-16
Supplement: Supplementary file 72 [file 30626.xls]

## Sheet: Sheet1
5.4	200	1080	0.00609607		0.11
5.39	986	5314.54	0.0300536		0.1
5.38	1741	9366.58	0.0530663		0.09
5.37	485	2604.45	0.014783		0.08
5.36	481	2578.16	0.0146611		0.07
5.35	2374	12700.9	0.0723604		0.06
5.34	1291	6893.94	0.0393502		0.05
5.33	3717	19811.6	0.113296		0.04
5.32	1657	8815.24	0.050506		0.03
5.31	1266	6722.46	0.0385881		0.02
5.3	3774	20002.2	0.115033		0.01
5.29	1327	7019.83	0.0404475		0
5.28	1396	7370.88	0.0425506		-0.01
5.27	548	2887.96	0.0167032		-0.02
5.26	2026	10656.8	0.0617532		-0.03
5.25	1824	9576	0.0555962		-0.04
5.24	803	4207.72	0.0244757		-0.05
5.23	601	3143.23	0.0183187		-0.06
5.22	1304	6806.88	0.0397464		-0.07
5.21	901	4694.21	0.0274628		-0.08
5.2	2529	13150.8	0.0770849		-0.09
5.19	560	2906.4	0.017069		-0.1
5.18	475	2460.5	0.0144782		-0.11
5.17	542	2802.14	0.0165204		-0.12
	32808	5.29058
