# Supplementary material for: Interaction Wave Functions and Interaction-Based Coherence and Entanglement in Complex Adaptive Systems
Source: Research Square preprint supplement (doi:10.21203/rs.3.rs-6846233/v1), 2025-06-16
Supplement: Supplementary file 73 [file 30627.xls]

## Sheet: Sheet1
5.5	1263	6946.5	0.0232148		0.09
5.49	2729	14982.2	0.0501608		0.08
5.48	1115	6110.2	0.0204944		0.07
5.47	2419	13231.9	0.0444628		0.06
5.46	6239	34064.9	0.114677		0.05
5.45	5438	29637.1	0.099954		0.04
5.44	3931	21384.6	0.0722544		0.03
5.43	1406	7634.58	0.0258432		0.02
5.42	2824	15306.1	0.051907		0.01
5.41	1306	7065.46	0.0240051		0
5.4	9440	50976	0.173513		-0.01
5.39	1623	8747.97	0.0298318		-0.02
5.38	1746	9393.48	0.0320926		-0.03
5.37	422	2266.14	0.00775664		-0.04
5.36	1162	6228.32	0.0213583		-0.05
5.35	2709	14493.2	0.0497932		-0.06
5.34	4940	26379.6	0.0908005		-0.07
5.33	1397	7446.01	0.0256778		-0.08
5.32	1091	5804.12	0.0200533		-0.09
5.31	1205	6398.55	0.0221487		-0.1
	54405	5.41305
