# Supplementary material for: Interaction Wave Functions and Interaction-Based Coherence and Entanglement in Complex Adaptive Systems
Source: Research Square preprint supplement (doi:10.21203/rs.3.rs-6846233/v1), 2025-06-16
Supplement: Supplementary file 74 [file 30602-06.xls]

## Sheet: Sheet1
0.07			100			100	7	0.00166069
0.06	636	24	230	148		1038	62.28	0.0172379
0.05	257	322	1014	34	143	1770	88.5	0.0293942
0.04	466	0	652	194	108	1420	56.8	0.0235818
0.03	208	633	1122	553	638	3154	94.62	0.0523781
0.02	997	1157	2015	967	1250	6386	127.72	0.106052
0.01	2217	996	1372	1574	3175	9334	93.34	0.155009
0	4544	3625	1780	1612	3929	15490	0	0.257241
-0.01	2866	3552	1160	684	3086	11348	-113.48	0.188455
-0.02	903	782	1237	644	919	4485	-89.7	0.0744819
-0.03	1203		2934	424		4561	-136.83	0.075744
-0.04	30		307	793		1130	-45.2	0.0187658
						60216	0.00240883
