# Supplementary material for: Interaction Wave Functions and Interaction-Based Coherence and Entanglement in Complex Adaptive Systems
Source: Research Square preprint supplement (doi:10.21203/rs.3.rs-6846233/v1), 2025-06-16
Supplement: Supplementary file 75 [file 30602.xls]

## Sheet: Sheet1
5.06	636	3218.16	0.0443917		0.06
5.05	257	1297.85	0.0179382		0.05
5.04	466	2348.64	0.032526		0.04
5.03	208	1046.24	0.014518		0.03
5.02	997	5004.94	0.0695889		0.02
5.01	2217	11107.2	0.154743		0.01
5	4544	22720	0.317163		0
4.99	2866	14301.3	0.200042		-0.01
4.98	903	4496.94	0.0630278		-0.02
4.97	1203	5978.91	0.0839673		-0.03
4.96	30	148.8	0.00209395		-0.04
	14327	5.00237
