# Supplementary material for: Interaction Wave Functions and Interaction-Based Coherence and Entanglement in Complex Adaptive Systems
Source: Research Square preprint supplement (doi:10.21203/rs.3.rs-6846233/v1), 2025-06-16
Supplement: Supplementary file 76 [file 30603.xls]

## Sheet: Sheet1
5.03	24	120.72	0.00216392		0.06
5.02	322	1616.44	0.0290325		0.05
5.01	0	0	0		0.04
5	633	3165	0.0570733		0.03
4.99	1157	5773.43	0.104319		0.02
4.98	996	4960.08	0.0898025		0.01
4.97	3625	18016.3	0.326842		0
4.96	3552	17617.9	0.32026		-0.01
4.95	782	3870.9	0.0705076		-0.02
	11091	4.97167
