# Supplementary material for: Interaction Wave Functions and Interaction-Based Coherence and Entanglement in Complex Adaptive Systems
Source: Research Square preprint supplement (doi:10.21203/rs.3.rs-6846233/v1), 2025-06-16
Supplement: Supplementary file 77 [file 30604.xls]

## Sheet: Sheet1
5	100	500	0.00718236		0.07
4.99	230	1147.7	0.0165194		0.06
4.98	1014	5049.72	0.0728291		0.05
4.97	652	3240.44	0.046829		0.04
4.96	1122	5565.12	0.0805861		0.03
4.95	2015	9974.25	0.144725		0.02
4.94	1372	6777.68	0.098542		0.01
4.93	1780	8775.4	0.127846		0
4.92	1160	5707.2	0.0833154		-0.01
4.91	1237	6073.67	0.0888458		-0.02
4.9	2934	14376.6	0.21073		-0.03
4.89	307	1501.23	0.0220498		-0.04
	13923	4.93349
