# Supplementary material for: Interaction Wave Functions and Interaction-Based Coherence and Entanglement in Complex Adaptive Systems
Source: Research Square preprint supplement (doi:10.21203/rs.3.rs-6846233/v1), 2025-06-16
Supplement: Supplementary file 78 [file 30605.xls]

## Sheet: Sheet1
5.01	148	741.48	0.0194047		0.06
5	34	170	0.00445785		0.05
4.99	194	968.06	0.025436		0.04
4.98	553	2753.94	0.0725056		0.03
4.97	967	4805.99	0.126786		0.02
4.96	1574	7807.04	0.206372		0.01
4.95	1612	7979.4	0.211354		0
4.94	684	3378.96	0.0896814		-0.01
4.93	644	3174.92	0.0844369		-0.02
4.92	424	2086.08	0.055592		-0.03
4.91	793	3893.63	0.103973		-0.04
	7627	4.95077
