# Supplementary material for: Interaction Wave Functions and Interaction-Based Coherence and Entanglement in Complex Adaptive Systems
Source: Research Square preprint supplement (doi:10.21203/rs.3.rs-6846233/v1), 2025-06-16
Supplement: Supplementary file 79 [file 30606.xls]

## Sheet: Sheet1
4.92	143	703.56	0.0107941		0.05
4.91	108	530.28	0.00815217		0.04
4.9	638	3126.2	0.0481582		0.03
4.89	1250	6112.5	0.0943539		0.02
4.88	3175	15494	0.239659		0.01
4.87	3929	19134.2	0.296573		0
4.86	3086	14998	0.232941		-0.01
4.85	919	4457.15	0.069369		-0.02
	13248	4.87288
