# Supplementary material for: Interaction Wave Functions and Interaction-Based Coherence and Entanglement in Complex Adaptive Systems
Source: Research Square preprint supplement (doi:10.21203/rs.3.rs-6846233/v1), 2025-06-16
Supplement: Supplementary file 80 [file 30609-13.xls]

## Sheet: Sheet1
0.05			369	280	55	704	35.2	0.01661
0.04			946	491	75	1512	60.48	0.0356738
0.03	336	491	662	1531	295	3315	99.45	0.0782135
0.02	1662	1014	2060	545	1385	6666	133.32	0.157276
0.01	1166	980	2752	1135	1615	7648	76.48	0.180445
0	1314	1963	676	1159	1490	6602	0	0.155766
-0.01	2527	1387	723	785	1195	6617	-66.17	0.15612
-0.02	2239	655	753	1313	582	5542	-110.84	0.130757
-0.03	439	373	307	691	41	1851	-55.53	0.0436721
-0.04		50	304	10		364	-14.56	0.00858815
-0.05		41	61			102	-5.1	0.00240657
-0.06			1343			1343	-80.58	0.0316865
-0.07			118			118	-8.26	0.00278407
						42384	0.00150741
