# Supplementary material for: Interaction Wave Functions and Interaction-Based Coherence and Entanglement in Complex Adaptive Systems
Source: Research Square preprint supplement (doi:10.21203/rs.3.rs-6846233/v1), 2025-06-16
Supplement: Supplementary file 81 [file 30609.xls]

## Sheet: Sheet1
4.86	336	1632.96	0.0347		0.03
4.85	1662	8060.7	0.171641		0.02
4.84	1166	5643.44	0.120417		0.01
4.83	1314	6346.62	0.135702		0
4.82	2527	12180.1	0.260973		-0.01
4.81	2239	10769.6	0.23123		-0.02
4.8	439	2107.2	0.0453372		-0.03
	9683	4.82708
