# Supplementary material for: Interaction Wave Functions and Interaction-Based Coherence and Entanglement in Complex Adaptive Systems
Source: Research Square preprint supplement (doi:10.21203/rs.3.rs-6846233/v1), 2025-06-16
Supplement: Supplementary file 82 [file 30610.xls]

## Sheet: Sheet1
4.86	491	2386.26	0.0706068		0.03
4.85	1014	4917.9	0.145815		0.02
4.84	980	4743.2	0.140926		0.01
4.83	1963	9481.29	0.282284		0
4.82	1387	6685.34	0.199454		-0.01
4.81	655	3150.55	0.0941904		-0.02
4.8	373	1790.4	0.0536382		-0.03
4.79	50	239.5	0.00719011		-0.04
4.78	41	195.98	0.00589589		-0.05
	6954	4.83037
