# Supplementary material for: Interaction Wave Functions and Interaction-Based Coherence and Entanglement in Complex Adaptive Systems
Source: Research Square preprint supplement (doi:10.21203/rs.3.rs-6846233/v1), 2025-06-16
Supplement: Supplementary file 83 [file 30611.xls]

## Sheet: Sheet1
4.94	369	1822.86	0.0333213		0.05
4.93	946	4663.78	0.0854253		0.04
4.92	662	3257.04	0.0597797		0.03
4.91	2060	10114.6	0.186021		0.02
4.9	2752	13484.8	0.24851		0.01
4.89	676	3305.64	0.0610439		0
4.88	723	3528.24	0.0652881		-0.01
4.87	753	3667.11	0.0679971		-0.02
4.86	307	1492.02	0.0277226		-0.03
4.85	304	1474.4	0.0274517		-0.04
4.84	61	295.24	0.0055084		-0.05
4.83	1343	6486.69	0.121275		-0.06
4.82	118	568.76	0.0106556		-0.07
	11074	4.89084
