# Supplementary material for: Interaction Wave Functions and Interaction-Based Coherence and Entanglement in Complex Adaptive Systems
Source: Research Square preprint supplement (doi:10.21203/rs.3.rs-6846233/v1), 2025-06-16
Supplement: Supplementary file 84 [file 30612.xls]

## Sheet: Sheet1
4.97	280	1391.6	0.0352645		0.05
4.96	491	2435.36	0.0618388		0.04
4.95	1531	7578.45	0.192821		0.03
4.94	545	2692.3	0.0686398		0.02
4.93	1135	5595.55	0.142947		0.01
4.92	1159	5702.28	0.14597		0
4.91	785	3854.35	0.0988665		-0.01
4.9	1313	6433.7	0.165365		-0.02
4.89	691	3378.99	0.0870277		-0.03
4.88	10	48.8	0.00125945		-0.04
	7940	4.92587
