# Supplementary material for: Interaction Wave Functions and Interaction-Based Coherence and Entanglement in Complex Adaptive Systems
Source: Research Square preprint supplement (doi:10.21203/rs.3.rs-6846233/v1), 2025-06-16
Supplement: Supplementary file 85 [file 30613.xls]

## Sheet: Sheet1
4.98	55	273.9	0.00816872		0.05
4.97	75	372.75	0.0111392		0.04
4.96	295	1463.2	0.0438141		0.03
4.95	1385	6855.75	0.205703		0.02
4.94	1615	7978.1	0.239863		0.01
4.93	1490	7345.7	0.221298		0
4.92	1195	5879.4	0.177484		-0.01
4.91	582	2857.62	0.0864399		-0.02
4.9	41	200.9	0.00608941		-0.03
	6733	4.93499
