# Supplementary material for: Interaction Wave Functions and Interaction-Based Coherence and Entanglement in Complex Adaptive Systems
Source: Research Square preprint supplement (doi:10.21203/rs.3.rs-6846233/v1), 2025-06-16
Supplement: Supplementary file 86 [file 30616-20.xls]

## Sheet: Sheet1
0.07				27		27	1.89	0.000892179
0.06				126		126	7.56	0.0041635
0.05				50		50	2.5	0.00165218
0.04			108	334		442	17.68	0.0146053
0.03	30		393	196	430	1049	31.47	0.0346628
0.02	271	174	1775	201	814	3235	64.7	0.106896
0.01	899	719	1458	468	1616	5160	51.6	0.170505
0	1972	1097	2379	1316	1102	7866	0	0.259921
-0.01	1682	1358	1012	1555	1449	7056	-70.56	0.233156
-0.02	582	630	534	1691	30	3467	-69.34	0.114562
-0.03		57	949	354		1360	-40.8	0.0449394
-0.04			375			375	-15	0.0123914
-0.05			50			50	-2.5	0.00165218
						30263	-0.000687308
