# Supplementary material for: Interaction Wave Functions and Interaction-Based Coherence and Entanglement in Complex Adaptive Systems
Source: Research Square preprint supplement (doi:10.21203/rs.3.rs-6846233/v1), 2025-06-16
Supplement: Supplementary file 87 [file 30616.xls]

## Sheet: Sheet1
4.95	30	148.5	0.00551876		0.03
4.94	271	1338.74	0.0498528		0.02
4.93	899	4432.07	0.165379		0.01
4.92	1972	9702.24	0.362767		0
4.91	1682	8258.62	0.309419		-0.01
4.9	582	2851.8	0.107064		-0.02
	5436	4.91758
