# Supplementary material for: Interaction Wave Functions and Interaction-Based Coherence and Entanglement in Complex Adaptive Systems
Source: Research Square preprint supplement (doi:10.21203/rs.3.rs-6846233/v1), 2025-06-16
Supplement: Supplementary file 88 [file 30617.xls]

## Sheet: Sheet1
4.95	174	861.3	0.0431227		0.02
4.94	719	3551.86	0.178191		0.01
4.93	1097	5408.21	0.271871		0
4.92	1358	6681.36	0.336555		-0.01
4.91	630	3093.3	0.156134		-0.02
4.9	57	279.3	0.0141264		-0.03
	4035	4.92573
