# Supplementary material for: Interaction Wave Functions and Interaction-Based Coherence and Entanglement in Complex Adaptive Systems
Source: Research Square preprint supplement (doi:10.21203/rs.3.rs-6846233/v1), 2025-06-16
Supplement: Supplementary file 89 [file 30618.xls]

## Sheet: Sheet1
5	108	540	0.0119562		0.04
4.99	393	1961.07	0.0435071		0.03
4.98	1775	8839.5	0.196502		0.02
4.97	1458	7246.26	0.161408		0.01
4.96	2379	11799.8	0.263368		0
4.95	1012	5009.4	0.112034		-0.01
4.94	534	2637.96	0.0591166		-0.02
4.93	949	4678.57	0.105059		-0.03
4.92	375	1845	0.0415144		-0.04
4.91	50	245.5	0.00553526		-0.05
	9033	4.95994
