# Supplementary material for: Interaction Wave Functions and Interaction-Based Coherence and Entanglement in Complex Adaptive Systems
Source: Research Square preprint supplement (doi:10.21203/rs.3.rs-6846233/v1), 2025-06-16
Supplement: Supplementary file 90 [file 30619.xls]

## Sheet: Sheet1
4.95	27	133.65	0.0042735		0.07
4.94	126	622.44	0.019943		0.06
4.93	50	246.5	0.0079139		0.05
4.92	334	1643.28	0.0528648		0.04
4.91	196	962.36	0.0310225		0.03
4.9	201	984.9	0.0318139		0.02
4.89	468	2288.52	0.0740741		0.01
4.88	1316	6422.08	0.208294		0
4.87	1555	7572.85	0.246122		-0.01
4.86	1691	8218.26	0.267648		-0.02
4.85	354	1716.9	0.0560304		-0.03
	6318	4.87682
