# Supplementary material for: Interaction Wave Functions and Interaction-Based Coherence and Entanglement in Complex Adaptive Systems
Source: Research Square preprint supplement (doi:10.21203/rs.3.rs-6846233/v1), 2025-06-16
Supplement: Supplementary file 91 [file 30620.xls]

## Sheet: Sheet1
4.87	430	2094.1	0.0790296		0.03
4.86	814	3956.04	0.149605		0.02
4.85	1616	7837.6	0.297004		0.01
4.84	1102	5333.68	0.202536		0
4.83	1449	6998.67	0.266311		-0.01
4.82	30	144.6	0.00551369		-0.02
	5441	4.84556
