# Supplementary material for: Interaction Wave Functions and Interaction-Based Coherence and Entanglement in Complex Adaptive Systems
Source: Research Square preprint supplement (doi:10.21203/rs.3.rs-6846233/v1), 2025-06-16
Supplement: Supplementary file 92 [file 30623-27.xls]

## Sheet: Sheet1
0.08				9	5	14	1.12	0.00042305
0.07				329	0	329	23.03	0.00994168
0.06			36	15	186	237	14.22	0.00716164
0.05			153	45	14	212	10.6	0.00640619
0.04		570	193	467	210	1440	57.6	0.0435137
0.03	3	462	1	275	449	1190	35.7	0.0359593
0.02	84	551	392	1369	1438	3834	76.68	0.115855
0.01	575	668	1010	938	1680	4871	48.71	0.147191
0	3093	821	299	208	476	4897	0	0.147977
-0.01	1894	2283	703	441	563	5884	-58.84	0.177802
-0.02	737	2408	244	1955	1383	6727	-134.54	0.203276
-0.03		598	444	908	796	2746	-82.38	0.0829783
-0.04			310	361		671	-26.84	0.0202762
-0.05			41			41	-2.05	0.00123893
						33093	-0.00111776
