# Supplementary material for: Interaction Wave Functions and Interaction-Based Coherence and Entanglement in Complex Adaptive Systems
Source: Research Square preprint supplement (doi:10.21203/rs.3.rs-6846233/v1), 2025-06-16
Supplement: Supplementary file 93 [file 30623.xls]

## Sheet: Sheet1
4.83	3	14.49	0.000469778		0.03
4.82	84	404.88	0.0131538		0.02
4.81	575	2765.75	0.0900407		0.01
4.8	3093	14846.4	0.484341		0
4.79	1894	9072.26	0.296586		-0.01
4.78	737	3522.86	0.115409		-0.02
	6386	4.7959
