# Supplementary material for: Interaction Wave Functions and Interaction-Based Coherence and Entanglement in Complex Adaptive Systems
Source: Research Square preprint supplement (doi:10.21203/rs.3.rs-6846233/v1), 2025-06-16
Supplement: Supplementary file 94 [file 30624.xls]

## Sheet: Sheet1
4.8	570	2736	0.0681737		0.04
4.79	462	2212.98	0.0552565		0.03
4.78	551	2633.78	0.0659012		0.02
4.77	668	3186.36	0.0798947		0.01
4.76	821	3907.96	0.098194		0
4.75	2283	10844.3	0.273053		-0.01
4.74	2408	11413.9	0.288004		-0.02
4.73	598	2828.54	0.0715225		-0.03
	8361	4.75587
