# Supplementary material for: Interaction Wave Functions and Interaction-Based Coherence and Entanglement in Complex Adaptive Systems
Source: Research Square preprint supplement (doi:10.21203/rs.3.rs-6846233/v1), 2025-06-16
Supplement: Supplementary file 95 [file 30625.xls]

## Sheet: Sheet1
4.82	36	173.52	0.0094093		0.06
4.81	153	735.93	0.0399895		0.05
4.8	193	926.4	0.0504443		0.04
4.79	1	4.79	0.00026137		0.03
4.78	392	1873.76	0.102457		0.02
4.77	1010	4817.7	0.263983		0.01
4.76	299	1423.24	0.0781495		0
4.75	703	3339.25	0.183743		-0.01
4.74	244	1156.56	0.0637742		-0.02
4.73	444	2100.12	0.116048		-0.03
4.72	310	1463.2	0.0810246		-0.04
4.71	41	193.11	0.0107162		-0.05
	3826	4.75891
