# Supplementary material for: Interaction Wave Functions and Interaction-Based Coherence and Entanglement in Complex Adaptive Systems
Source: Research Square preprint supplement (doi:10.21203/rs.3.rs-6846233/v1), 2025-06-16
Supplement: Supplementary file 96 [file 30626.xls]

## Sheet: Sheet1
4.8	9	43.2	0.00122951		0.08
4.79	329	1575.91	0.0449454		0.07
4.78	15	71.7	0.00204918		0.06
4.77	45	214.65	0.00614754		0.05
4.76	467	2222.92	0.0637978		0.04
4.75	275	1306.25	0.0375683		0.03
4.74	1369	6489.06	0.187022		0.02
4.73	938	4436.74	0.128142		0.01
4.72	208	981.76	0.0284153		0
4.71	441	2077.11	0.0602459		-0.01
4.7	1955	9188.5	0.267077		-0.02
4.69	908	4258.52	0.124044		-0.03
4.68	361	1689.48	0.0493169		-0.04
	7320	4.72074
