# Supplementary material for: Interaction Wave Functions and Interaction-Based Coherence and Entanglement in Complex Adaptive Systems
Source: Research Square preprint supplement (doi:10.21203/rs.3.rs-6846233/v1), 2025-06-16
Supplement: Supplementary file 97 [file 30627.xls]

## Sheet: Sheet1
4.77	5	23.85	0.000694444		0.08
4.76	0	0	0		0.07
4.75	186	883.5	0.0258333		0.06
4.74	14	66.36	0.00194444		0.05
4.73	210	993.3	0.0291667		0.04
4.72	449	2119.28	0.0623611		0.03
4.71	1438	6772.98	0.199722		0.02
4.7	1680	7896	0.233333		0.01
4.69	476	2232.44	0.0661111		0
4.68	563	2634.84	0.0781944		-0.01
4.67	1383	6458.61	0.192083		-0.02
4.66	796	3709.36	0.110556		-0.03
	7200	4.69313
