# Supplementary material for: Interaction Wave Functions and Interaction-Based Coherence and Entanglement in Complex Adaptive Systems
Source: Research Square preprint supplement (doi:10.21203/rs.3.rs-6846233/v1), 2025-06-16
Supplement: Supplementary file 98 [file 30630.xls]

## Sheet: Sheet1
4.69	84	393.96	0.019458		0.03
4.68	349	1633.32	0.0808432		0.02
4.67	618	2886.06	0.143155		0.01
4.66	1191	5550.06	0.275886		0
4.65	1243	5779.95	0.287931		-0.01
4.64	749	3475.36	0.1735		-0.02
4.63	83	384.29	0.0192263		-0.03
	4317	4.65671
