# Supplementary material for: Interaction Wave Functions and Interaction-Based Coherence and Entanglement in Complex Adaptive Systems
Source: Research Square preprint supplement (doi:10.21203/rs.3.rs-6846233/v1), 2025-06-16
Supplement: Supplementary file 99 [file 20108.xls]

## Sheet: Sheet1
5.72	100	572	0.00996314
5.71	343	1958.53	0.0341736
5.7	829	4725.3	0.0825944
5.69	715	4068.35	0.0712364
5.68	1068	6066.24	0.106406
5.67	1459	8272.53	0.145362
5.66	1222	6916.52	0.12175
5.65	1490	8418.5	0.148451
5.64	961	5420.04	0.0957457
5.63	578	3254.14	0.0575869
5.62	597	3355.14	0.0594799
5.61	319	1789.59	0.0317824
5.6	224	1254.4	0.0223174
5.59	104	581.36	0.0103617
5.58	10	55.8	0.000996314
5.57	18	100.26	0.00179336
	10037	5.65993
