# Supplementary material for: Interaction Wave Functions and Interaction-Based Coherence and Entanglement in Complex Adaptive Systems
Source: Research Square preprint supplement (doi:10.21203/rs.3.rs-6846233/v1), 2025-06-16
Supplement: Supplementary file 100 [file 30602-06.xls]

## Sheet: Sheet1
0.19			4052			4052	769.88	0.0104208
0.18			2118			2118	381.24	0.00544698
0.17			4070			4070	691.9	0.0104671
0.16			4277			4277	684.32	0.0109994
0.15			5951			5951	892.65	0.0153045
0.14			1677			1677	234.78	0.00431284
0.13			0	2854		2854	371.02	0.0073398
0.12			730	2244	67	3041	364.92	0.00782072
0.11			4711	1317	1985	8013	881.43	0.0206075
0.1			1098	1093	2446	4637	463.7	0.0119252
0.09			15567	316	2861	18744	1686.96	0.048205
0.08			6954	575	2679	10208	816.64	0.0262525
0.07			9581	938	2139	12658	886.06	0.0325533
0.06	132		9945	3770	4604	18451	1107.06	0.0474515
0.05	7	607	5174	6471	2762	15021	751.05	0.0386304
0.04	276	7002	3912	3297	1836	16323	652.92	0.0419788
0.03	2342	6644	2709	5963	1592	19250	577.5	0.0495064
0.02	4254	19478	1262	3657	2114	30765	615.3	0.0791201
0.01	8320	11877	0	2015	6145	28357	283.57	0.0729274
-3.1225e-17	5634	11449	0	2741	2331	22155	-6.9179e-13	0.0569773
-0.01	4465	5675	6124	804	2358	19426	-194.26	0.049959
-0.02	3452	1287	0	3641	3400	11780	-235.6	0.0302953
-0.03	3558	1157	0	8386	1571	14672	-440.16	0.0377328
-0.04	2863	570	2989	8750	3549	18721	-748.84	0.0481459
-0.05		664	0	6800	2805	10269	-513.45	0.0264094
-0.06		374	703	4296	3173	8546	-512.76	0.0219782
-0.07		557	4145	2702	3439	10843	-759.01	0.0278856
-0.08		729	1550	203	2325	4807	-384.56	0.0123624
-0.09		799	1809	1469	4870	8947	-805.23	0.0230095
-0.1		2183	649	634	2487	5953	-595.3	0.0153097
-0.11		1167	4416		935	6518	-716.98	0.0167627
-0.12		396	2556			2952	-354.24	0.00759183
-0.13		1144	3851			4995	-649.35	0.0128459
-0.14		417	1856			2273	-318.22	0.00584561
-0.15		24	1889			1913	-286.95	0.00491977
-0.16		38	3318			3356	-536.96	0.00863082
-0.17		91	3786			3877	-659.09	0.00997071
-0.18		340	1977			2317	-417.06	0.00595876
-0.19		188	692			880	-167.2	0.00226315
-0.2		0	1206			1206	-241.2	0.00310154
-0.21		860	4052			4912	-1031.52	0.0126325
-0.22			1577			1577	-346.94	0.00405566
-0.23			1854			1854	-426.42	0.00476804
-0.24			1814			1814	-435.36	0.00466517
-0.25			1423			1423	-355.75	0.00365961
-0.26			386			386	-100.36	0.000992699
						388839	0.00226348
