# Supplementary material for: Interaction Wave Functions and Interaction-Based Coherence and Entanglement in Complex Adaptive Systems
Source: Research Square preprint supplement (doi:10.21203/rs.3.rs-6846233/v1), 2025-06-16
Supplement: Supplementary file 101 [file 30602.xls]

## Sheet: Sheet1
5.95	132	785.4	0.00373906		0.06
5.94	7	41.58	0.000198283		0.05
5.93	276	1636.68	0.00781803		0.04
5.92	2342	13864.6	0.06634		0.03
5.91	4254	25141.1	0.1205		0.02
5.9	8320	49088	0.235674		0.01
5.89	5634	33184.3	0.15959		0
5.88	4465	26254.2	0.126477		-0.01
5.87	3452	20263.2	0.0977821		-0.02
5.86	3558	20849.9	0.100785		-0.03
5.85	2863	16748.6	0.0810979		-0.04
	35303	5.88782
