# Supplementary material for: Interaction Wave Functions and Interaction-Based Coherence and Entanglement in Complex Adaptive Systems
Source: Research Square preprint supplement (doi:10.21203/rs.3.rs-6846233/v1), 2025-06-16
Supplement: Supplementary file 102 [file 30603.xls]

## Sheet: Sheet1
6.18	607	3751.26	0.00801669		0.05
6.17	7002	43202.3	0.0924759		0.04
6.16	6644	40927	0.0877478		0.03
6.15	19478	119790	0.257247		0.02
6.14	11877	72924.8	0.15686		0.01
6.13	11449	70182.4	0.151208		0
6.12	5675	34731	0.0749501		-0.01
6.11	1287	7863.57	0.0169975		-0.02
6.1	1157	7057.7	0.0152806		-0.03
6.09	570	3471.3	0.00752803		-0.04
6.08	664	4037.12	0.0087695		-0.05
6.07	374	2270.18	0.00493945		-0.06
6.06	557	3375.42	0.00735634		-0.07
6.05	729	4410.45	0.00962796		-0.08
6.04	799	4825.96	0.0105525		-0.09
6.03	2183	13163.5	0.028831		-0.1
6.02	1167	7025.34	0.0154127		-0.11
6.01	396	2379.96	0.00523		-0.12
6	1144	6864	0.0151089		-0.13
5.99	417	2497.83	0.00550735		-0.14
5.98	24	143.52	0.00031697		-0.15
5.97	38	226.86	0.000501869		-0.16
5.96	91	542.36	0.00120184		-0.17
5.95	340	2023	0.00449041		-0.18
5.94	188	1116.72	0.00248293		-0.19
5.93	0	0	0		-0.2
5.92	860	5091.2	0.0113581		-0.21
	75717	6.12669
