# Supplementary material for: Interaction Wave Functions and Interaction-Based Coherence and Entanglement in Complex Adaptive Systems
Source: Research Square preprint supplement (doi:10.21203/rs.3.rs-6846233/v1), 2025-06-16
Supplement: Supplementary file 103 [file 30604.xls]

## Sheet: Sheet1
6.5	4052	26338	0.0292753		0.19
6.49	2118	13745.8	0.0153024		0.18
6.48	4070	26373.6	0.0294054		0.17
6.47	4277	27672.2	0.0309009		0.16
6.46	5951	38443.5	0.0429954		0.15
6.45	1677	10816.7	0.0121162		0.14
6.44	0	0	0		0.13
6.43	730	4693.9	0.00527419		0.12
6.42	4711	30244.6	0.0340366		0.11
6.41	1098	7038.18	0.00793295		0.1
6.4	15567	99628.8	0.11247		0.09
6.39	6954	44436.1	0.050242		0.08
6.38	9581	61126.8	0.0692219		0.07
6.37	9945	63349.7	0.0718517		0.06
6.36	5174	32906.6	0.0373817		0.05
6.35	3912	24841.2	0.0282639		0.04
6.34	2709	17175.1	0.0195723		0.03
6.33	1262	7988.46	0.00911784		0.02
6.32	0	0	0		0.01
6.31	0	0	0		0
6.3	6124	38581.2	0.0442454		-0.01
6.29	0	0	0		-0.02
6.28	0	0	0		-0.03
6.27	2989	18741	0.0215953		-0.04
6.26	0	0	0		-0.05
6.25	703	4393.75	0.00507911		-0.06
6.24	4145	25864.8	0.0299473		-0.07
6.23	1550	9656.5	0.0111986		-0.08
6.22	1809	11252	0.0130699		-0.09
6.21	649	4030.29	0.00468897		-0.1
6.2	4416	27379.2	0.0319052		-0.11
6.19	2556	15821.6	0.0184669		-0.12
6.18	3851	23799.2	0.0278231		-0.13
6.17	1856	11451.5	0.0134094		-0.14
6.16	1889	11636.2	0.0136479		-0.15
6.15	3318	20405.7	0.0239723		-0.16
6.14	3786	23246	0.0273535		-0.17
6.13	1977	12119	0.0142837		-0.18
6.12	692	4235.04	0.00499964		-0.19
6.11	1206	7368.66	0.00871324		-0.2
6.1	4052	24717.2	0.0292753		-0.21
6.09	1577	9603.93	0.0113937		-0.22
6.08	1854	11272.3	0.013395		-0.23
6.07	1814	11011	0.013106		-0.24
6.06	1423	8623.38	0.010281		-0.25
6.05	386	2335.3	0.00278882		-0.26
	138410	6.3172
