# Supplementary material for: Interaction Wave Functions and Interaction-Based Coherence and Entanglement in Complex Adaptive Systems
Source: Research Square preprint supplement (doi:10.21203/rs.3.rs-6846233/v1), 2025-06-16
Supplement: Supplementary file 104 [file 30605.xls]

## Sheet: Sheet1
6.38	2854	18208.5	0.0380858		0.13
6.37	2244	14294.3	0.0299456		0.12
6.36	1317	8376.12	0.017575		0.11
6.35	1093	6940.55	0.0145858		0.1
6.34	316	2003.44	0.00421693		0.09
6.33	575	3639.75	0.00767321		0.08
6.32	938	5928.16	0.0125173		0.07
6.31	3770	23788.7	0.0503096		0.06
6.3	6471	40767.3	0.0863537		0.05
6.29	3297	20738.1	0.0439975		0.04
6.28	5963	37447.6	0.0795746		0.03
6.27	3657	22929.4	0.0488016		0.02
6.26	2015	12613.9	0.0268896		0.01
6.25	2741	17131.3	0.0365779		0
6.24	804	5016.96	0.0107292		-0.01
6.23	3641	22683.4	0.0485881		-0.02
6.22	8386	52160.9	0.111909		-0.03
6.21	8750	54337.5	0.116766		-0.04
6.2	6800	42160	0.0907441		-0.05
6.19	4296	26592.2	0.0573289		-0.06
6.18	2702	16698.4	0.0360574		-0.07
6.17	203	1252.51	0.00270898		-0.08
6.16	1469	9049.04	0.0196034		-0.09
6.15	634	3899.1	0.00846055		-0.1
	74936	6.2541
