# Supplementary material for: Interaction Wave Functions and Interaction-Based Coherence and Entanglement in Complex Adaptive Systems
Source: Research Square preprint supplement (doi:10.21203/rs.3.rs-6846233/v1), 2025-06-16
Supplement: Supplementary file 105 [file 30606.xls]

## Sheet: Sheet1
6.26	67	419.42	0.00103919		0.12
6.25	1985	12406.2	0.0307881		0.11
6.24	2446	15263	0.0379384		0.1
6.23	2861	17824	0.0443752		0.09
6.22	2679	16663.4	0.0415523		0.08
6.21	2139	13283.2	0.0331767		0.07
6.2	4604	28544.8	0.0714097		0.06
6.19	2762	17096.8	0.0428396		0.05
6.18	1836	11346.5	0.028477		0.04
6.17	1592	9822.64	0.0246925		0.03
6.16	2114	13022.2	0.0327889		0.02
6.15	6145	37791.8	0.0953112		0.01
6.14	2331	14312.3	0.0361547		0
6.13	2358	14454.5	0.0365734		-0.01
6.12	3400	20808	0.0527353		-0.02
6.11	1571	9598.81	0.0243668		-0.03
6.1	3549	21648.9	0.0550463		-0.04
6.09	2805	17082.5	0.0435066		-0.05
6.08	3173	19291.8	0.0492144		-0.06
6.07	3439	20874.7	0.0533402		-0.07
6.06	2325	14089.5	0.0360616		-0.08
6.05	4870	29463.5	0.0755355		-0.09
6.04	2487	15021.5	0.0385743		-0.1
6.03	935	5638.05	0.0145022		-0.11
	64473	6.13851
