# Supplementary material for: Interaction Wave Functions and Interaction-Based Coherence and Entanglement in Complex Adaptive Systems
Source: Research Square preprint supplement (doi:10.21203/rs.3.rs-6846233/v1), 2025-06-16
Supplement: Supplementary file 106 [file 30609-13.xls]

## Sheet: Sheet1
0.05	963	588		452		2003	100.15	0.0136527
0.04	1168	1051	927	1402		4548	181.92	0.0309997
0.03	740	2676	2320	2202	800	8738	262.14	0.0595593
0.02	1063	4627	9075	3579	14633	32977	659.54	0.224775
0.01	1753	2408	8578	4730	5289	22758	227.58	0.155121
0	2103	3535	10328	5349	5268	26583	0	0.181193
-0.01	2645	2881	4592	3214	3803	17135	-171.35	0.116794
-0.02	4335	2678	1981	2085	1421	12500	-250	0.0852015
-0.03	1853	2761	832	2500	2942	10888	-326.64	0.0742139
-0.04	1072	104	519		2094	3789	-151.56	0.0258263
-0.05	25		482		567	1074	-53.7	0.00732051
-0.06			192		142	334	-20.04	0.00227658
-0.07			179			179	-12.53	0.00122009
-0.08			1393			1393	-111.44	0.00949486
-0.09			1143			1143	-102.87	0.00779083
-0.1			422			422	-42.2	0.0028764
-0.11			173			173	-19.03	0.00117919
-0.12			34			34	-4.08	0.000231748
-0.13			40			40	-5.2	0.000272645
						146711	0.00109528
