# Supplementary material for: Interaction Wave Functions and Interaction-Based Coherence and Entanglement in Complex Adaptive Systems
Source: Research Square preprint supplement (doi:10.21203/rs.3.rs-6846233/v1), 2025-06-16
Supplement: Supplementary file 107 [file 30609.xls]

## Sheet: Sheet1
5.05	963	4863.15	0.0543454		0.05
5.04	1168	5886.72	0.0659142		0.04
5.03	740	3722.2	0.0417607		0.03
5.02	1063	5336.26	0.0599887		0.02
5.01	1753	8782.53	0.0989278		0.01
5	2103	10515	0.118679		0
4.99	2645	13198.6	0.149266		-0.01
4.98	4335	21588.3	0.244639		-0.02
4.97	1853	9209.41	0.104571		-0.03
4.96	1072	5317.12	0.0604966		-0.04
4.95	25	123.75	0.00141084		-0.05
	17720	4.99678
