# Supplementary material for: Interaction Wave Functions and Interaction-Based Coherence and Entanglement in Complex Adaptive Systems
Source: Research Square preprint supplement (doi:10.21203/rs.3.rs-6846233/v1), 2025-06-16
Supplement: Supplementary file 108 [file 30610.xls]

## Sheet: Sheet1
4.98	588	2928.24	0.0252263		0.05
4.97	1051	5223.47	0.0450899		0.04
4.96	2676	13273	0.114805		0.03
4.95	4627	22903.7	0.198507		0.02
4.94	2408	11895.5	0.103308		0.01
4.93	3535	17427.6	0.151658		0
4.92	2881	14174.5	0.1236		-0.01
4.91	2678	13149	0.114891		-0.02
4.9	2761	13528.9	0.118452		-0.03
4.89	104	508.56	0.0044618		-0.04
	23309	4.93425
