# Supplementary material for: Interaction Wave Functions and Interaction-Based Coherence and Entanglement in Complex Adaptive Systems
Source: Research Square preprint supplement (doi:10.21203/rs.3.rs-6846233/v1), 2025-06-16
Supplement: Supplementary file 109 [file 30611.xls]

## Sheet: Sheet1
5.09	927	4718.43	0.0214534		0.04
5.08	2320	11785.6	0.0536913		0.03
5.07	9075	46010.2	0.210021		0.02
5.06	8578	43404.7	0.198519		0.01
5.05	10328	52156.4	0.239019		0
5.04	4592	23143.7	0.106272		-0.01
5.03	1981	9964.43	0.0458459		-0.02
5.02	832	4176.64	0.0192548		-0.03
5.01	519	2600.19	0.0120111		-0.04
5	482	2410	0.0111548		-0.05
4.99	192	958.08	0.00444342		-0.06
4.98	179	891.42	0.00414256		-0.07
4.97	1393	6923.21	0.0322379		-0.08
4.96	1143	5669.28	0.0264522		-0.09
4.95	422	2088.9	0.00976626		-0.1
4.94	173	854.62	0.0040037		-0.11
4.93	34	167.62	0.000786855		-0.12
4.92	40	196.8	0.000925712		-0.13
	43210	5.04791
