# Supplementary material for: Interaction Wave Functions and Interaction-Based Coherence and Entanglement in Complex Adaptive Systems
Source: Research Square preprint supplement (doi:10.21203/rs.3.rs-6846233/v1), 2025-06-16
Supplement: Supplementary file 110 [file 30612.xls]

## Sheet: Sheet1
5.08	452	2296.16	0.0177165		0.05
5.07	1402	7108.14	0.0549524		0.04
5.06	2202	11142.1	0.0863089		0.03
5.05	3579	18074	0.140281		0.02
5.04	4730	23839.2	0.185396		0.01
5.03	5349	26905.5	0.209658		0
5.02	3214	16134.3	0.125975		-0.01
5.01	2085	10445.9	0.081723		-0.02
5	2500	12500	0.0979893		-0.03
	25513	5.0345
