# Supplementary material for: Interaction Wave Functions and Interaction-Based Coherence and Entanglement in Complex Adaptive Systems
Source: Research Square preprint supplement (doi:10.21203/rs.3.rs-6846233/v1), 2025-06-16
Supplement: Supplementary file 111 [file 30613.xls]

## Sheet: Sheet1
5.11	800	4088	0.0216456		0.03
5.1	14633	74628.3	0.395925		0.02
5.09	5289	26921	0.143105		0.01
5.08	5268	26761.4	0.142536		0
5.07	3803	19281.2	0.102898		-0.01
5.06	1421	7190.26	0.038448		-0.02
5.05	2942	14857.1	0.0796017		-0.03
5.04	2094	10553.8	0.0566574		-0.04
5.03	567	2852.01	0.0153413		-0.05
5.02	142	712.84	0.0038421		-0.06
	36959	5.08255
