# Supplementary material for: Interaction Wave Functions and Interaction-Based Coherence and Entanglement in Complex Adaptive Systems
Source: Research Square preprint supplement (doi:10.21203/rs.3.rs-6846233/v1), 2025-06-16
Supplement: Supplementary file 112 [file 30616-20.xls]

## Sheet: Sheet1
0.07	35			10		45	3.15	0.000461155
0.06	24	5		14		43	2.58	0.00044066
0.05	122	447	137	551		1257	62.85	0.0128816
0.04	5	1782	209	426	458	2880	115.2	0.0295139
0.03	157	1824	2859	926	1094	6860	205.8	0.0703006
0.02	1735	3523	2667	1849	1146	10920	218.4	0.111907
0.01	3320	6495	3759	5354	1583	20511	205.11	0.210195
0	3959	2006	5768	2881	2134	16748	0	0.171632
-0.01	4700	2457	1891	4958	1404	15410	-154.1	0.15792
-0.02	2681	2983	4627	1253	2159	13703	-274.06	0.140427
-0.03		1797	3218	143	591	5749	-172.47	0.0589152
-0.04		2030	1425			3455	-138.2	0.0354065
						97581	0.000761009
