# Supplementary material for: Interaction Wave Functions and Interaction-Based Coherence and Entanglement in Complex Adaptive Systems
Source: Research Square preprint supplement (doi:10.21203/rs.3.rs-6846233/v1), 2025-06-16
Supplement: Supplementary file 113 [file 30616.xls]

## Sheet: Sheet1
5.1	35	178.5	0.00209105		0.07
5.09	24	122.16	0.00143386		0.06
5.08	122	619.76	0.0072888		0.05
5.07	5	25.35	0.000298721		0.04
5.06	157	794.42	0.00937985		0.03
5.05	1735	8761.75	0.103656		0.02
5.04	3320	16732.8	0.198351		0.01
5.03	3959	19913.8	0.236528		0
5.02	4700	23594	0.280798		-0.01
5.01	2681	13431.8	0.160174		-0.02
	16738	5.02894
