# Supplementary material for: Interaction Wave Functions and Interaction-Based Coherence and Entanglement in Complex Adaptive Systems
Source: Research Square preprint supplement (doi:10.21203/rs.3.rs-6846233/v1), 2025-06-16
Supplement: Supplementary file 114 [file 30617.xls]

## Sheet: Sheet1
5.05	5	25.25	0.000197246		0.06
5.04	447	2252.88	0.0176338		0.05
5.03	1782	8963.46	0.0702986		0.04
5.02	1824	9156.48	0.0719555		0.03
5.01	3523	17650.2	0.13898		0.02
5	6495	32475	0.256223		0.01
4.99	2006	10009.9	0.0791353		0
4.98	2457	12235.9	0.0969269		-0.01
4.97	2983	14825.5	0.117677		-0.02
4.96	1797	8913.12	0.0708904		-0.03
4.95	2030	10048.5	0.0800821		-0.04
	25349	4.99255
