# Supplementary material for: Interaction Wave Functions and Interaction-Based Coherence and Entanglement in Complex Adaptive Systems
Source: Research Square preprint supplement (doi:10.21203/rs.3.rs-6846233/v1), 2025-06-16
Supplement: Supplementary file 115 [file 30618.xls]

## Sheet: Sheet1
5.02	137	687.74	0.00515813		0.05
5.01	209	1047.09	0.00786898		0.04
5	2859	14295	0.107643		0.03
4.99	2667	13308.3	0.100414		0.02
4.98	3759	18719.8	0.141529		0.01
4.97	5768	28667	0.217169		0
4.96	1891	9379.36	0.0711973		-0.01
4.95	4627	22903.7	0.174209		-0.02
4.94	3218	15896.9	0.12116		-0.03
4.93	1425	7025.25	0.0536521		-0.04
	26560	4.96725
