# Supplementary material for: Interaction Wave Functions and Interaction-Based Coherence and Entanglement in Complex Adaptive Systems
Source: Research Square preprint supplement (doi:10.21203/rs.3.rs-6846233/v1), 2025-06-16
Supplement: Supplementary file 116 [file 30619.xls]

## Sheet: Sheet1
4.98	10	49.8	0.000544514		0.07
4.97	14	69.58	0.00076232		0.06
4.96	551	2732.96	0.0300027		0.05
4.95	426	2108.7	0.0231963		0.04
4.94	926	4574.44	0.050422		0.03
4.93	1849	9115.57	0.100681		0.02
4.92	5354	26341.7	0.291533		0.01
4.91	2881	14145.7	0.156874		0
4.9	4958	24294.2	0.26997		-0.01
4.89	1253	6127.17	0.0682276		-0.02
4.88	143	697.84	0.00778655		-0.03
	18365	4.91466
