# Supplementary material for: Interaction Wave Functions and Interaction-Based Coherence and Entanglement in Complex Adaptive Systems
Source: Research Square preprint supplement (doi:10.21203/rs.3.rs-6846233/v1), 2025-06-16
Supplement: Supplementary file 117 [file 30620.xls]

## Sheet: Sheet1
4.96	458	2271.68	0.0433343		0.04
4.95	1094	5415.3	0.10351		0.03
4.94	1146	5661.24	0.10843		0.02
4.93	1583	7804.19	0.149778		0.01
4.92	2134	10499.3	0.201911		0
4.91	1404	6893.64	0.132841		-0.01
4.9	2159	10579.1	0.204277		-0.02
4.89	591	2889.99	0.0559183		-0.03
	10569	4.92141
