# Supplementary material for: Interaction Wave Functions and Interaction-Based Coherence and Entanglement in Complex Adaptive Systems
Source: Research Square preprint supplement (doi:10.21203/rs.3.rs-6846233/v1), 2025-06-16
Supplement: Supplementary file 118 [file 30623-27.xls]

## Sheet: Sheet1
0.08				162		162	12.96	0.00223989
0.07	67			179	71	317	22.19	0.00438299
0.06	23		78	338	20	459	27.54	0.00634635
0.05	164		159	2351	183	2857	142.85	0.0395022
0.04	465		435	1625	772	3297	131.88	0.0455859
0.03	1629	362	1043	2409	1017	6460	193.8	0.089319
0.02	1629	1148	1519	2462	2683	9441	188.82	0.130536
0.01	1634	1461	1596	1565	1255	7511	75.11	0.103851
0	1832	5554	1214	1430	534	10564	0	0.146063
-0.01	4117	5585	1574	1164	509	12949	-129.49	0.179039
-0.02	2677	791	632	1444	1616	7160	-143.2	0.0989976
-0.03	130	100	2392	1113	2127	5862	-175.86	0.0810508
-0.04			617	1214		1831	-73.24	0.0253163
-0.05			159	2310		2469	-123.45	0.0341376
-0.06				371		371	-22.26	0.00512962
-0.07				615		615	-43.05	0.00850328
						72325	0.00116972
