# Supplementary material for: Interaction Wave Functions and Interaction-Based Coherence and Entanglement in Complex Adaptive Systems
Source: Research Square preprint supplement (doi:10.21203/rs.3.rs-6846233/v1), 2025-06-16
Supplement: Supplementary file 119 [file 30623.xls]

## Sheet: Sheet1
4.93	67	330.31	0.00466346		0.07
4.92	23	113.16	0.00160089		0.06
4.91	164	805.24	0.011415		0.05
4.9	465	2278.5	0.0323658		0.04
4.89	1629	7965.81	0.113385		0.03
4.88	1629	7949.52	0.113385		0.02
4.87	1634	7957.58	0.113733		0.01
4.86	1832	8903.52	0.127514		0
4.85	4117	19967.5	0.286559		-0.01
4.84	2677	12956.7	0.18633		-0.02
4.83	130	627.9	0.00904851		-0.03
	14367	4.86223
