# Supplementary material for: Interaction Wave Functions and Interaction-Based Coherence and Entanglement in Complex Adaptive Systems
Source: Research Square preprint supplement (doi:10.21203/rs.3.rs-6846233/v1), 2025-06-16
Supplement: Supplementary file 120 [file 30624.xls]

## Sheet: Sheet1
4.9	362	1773.8	0.0241317		0.03
4.89	1148	5613.72	0.0765282		0.02
4.88	1461	7129.68	0.0973935		0.01
4.87	5554	27048	0.370242		0
4.86	5585	27143.1	0.372309		-0.01
4.85	791	3836.35	0.0527298		-0.02
4.84	100	484	0.00666622		-0.03
	15001	4.86825
