# Supplementary material for: Interaction Wave Functions and Interaction-Based Coherence and Entanglement in Complex Adaptive Systems
Source: Research Square preprint supplement (doi:10.21203/rs.3.rs-6846233/v1), 2025-06-16
Supplement: Supplementary file 121 [file 30625.xls]

## Sheet: Sheet1
4.89	78	381.42	0.00683132		0.06
4.88	159	775.92	0.0139254		0.05
4.87	435	2118.45	0.0380977		0.04
4.86	1043	5068.98	0.091347		0.03
4.85	1519	7367.15	0.133036		0.02
4.84	1596	7724.64	0.139779		0.01
4.83	1214	5863.62	0.106323		0
4.82	1574	7586.68	0.137853		-0.01
4.81	632	3039.92	0.0553512		-0.02
4.8	2392	11481.6	0.209494		-0.03
4.79	617	2955.43	0.0540375		-0.04
4.78	159	760.02	0.0139254		-0.05
	11418	4.8278
