# Supplementary material for: Interaction Wave Functions and Interaction-Based Coherence and Entanglement in Complex Adaptive Systems
Source: Research Square preprint supplement (doi:10.21203/rs.3.rs-6846233/v1), 2025-06-16
Supplement: Supplementary file 122 [file 30626.xls]

## Sheet: Sheet1
4.83	162	782.46	0.00780648		0.08
4.82	179	862.78	0.00862567		0.07
4.81	338	1625.78	0.0162876		0.06
4.8	2351	11284.8	0.11329		0.05
4.79	1625	7783.75	0.0783057		0.04
4.78	2409	11515	0.116085		0.03
4.77	2462	11743.7	0.118639		0.02
4.76	1565	7449.4	0.0754144		0.01
4.75	1430	6792.5	0.068909		0
4.74	1164	5517.36	0.056091		-0.01
4.73	1444	6830.12	0.0695837		-0.02
4.72	1113	5253.36	0.0536334		-0.03
4.71	1214	5717.94	0.0585004		-0.04
4.7	2310	10857	0.111315		-0.05
4.69	371	1739.99	0.0178778		-0.06
4.68	615	2878.2	0.0296357		-0.07
	20752	4.753
