# Supplementary material for: Interaction Wave Functions and Interaction-Based Coherence and Entanglement in Complex Adaptive Systems
Source: Research Square preprint supplement (doi:10.21203/rs.3.rs-6846233/v1), 2025-06-16
Supplement: Supplementary file 123 [file 30627.xls]

## Sheet: Sheet1
4.8	71	340.8	0.006582		0.07
4.79	20	95.8	0.00185408		0.06
4.78	183	874.74	0.0169649		0.05
4.77	772	3682.44	0.0715676		0.04
4.76	1017	4840.92	0.0942802		0.03
4.75	2683	12744.3	0.248725		0.02
4.74	1255	5948.7	0.116344		0.01
4.73	534	2525.82	0.049504		0
4.72	509	2402.48	0.0471864		-0.01
4.71	1616	7611.36	0.14981		-0.02
4.7	2127	9996.9	0.197182		-0.03
	10787	4.73387
