# Supplementary material for: Interaction Wave Functions and Interaction-Based Coherence and Entanglement in Complex Adaptive Systems
Source: Research Square preprint supplement (doi:10.21203/rs.3.rs-6846233/v1), 2025-06-16
Supplement: Supplementary file 124 [file 30630.xls]

## Sheet: Sheet1
4.77	10	47.7	0.000377245		0.12
4.76	182	866.32	0.00686585		0.11
4.75	880	4180	0.0331975		0.1
4.74	2548	12077.5	0.0961219		0.09
4.73	1474	6972.02	0.0556059		0.08
4.72	466	2199.52	0.0175796		0.07
4.71	313	1474.23	0.0118078		0.06
4.7	1478	6946.6	0.0557568		0.05
4.69	1510	7081.9	0.0569639		0.04
4.68	1431	6697.08	0.0539837		0.03
4.67	1962	9162.54	0.0740154		0.02
4.66	2780	12954.8	0.104874		0.01
4.65	888	4129.2	0.0334993		0
4.64	289	1340.96	0.0109024		-0.01
4.63	285	1319.55	0.0107515		-0.02
4.62	413	1908.06	0.0155802		-0.03
4.61	2170	10003.7	0.0818621		-0.04
4.6	1620	7452	0.0611136		-0.05
4.59	30	137.7	0.00113173		-0.06
4.58	4055	18571.9	0.152973		-0.07
4.57	271	1238.47	0.0102233		-0.08
4.56	1453	6625.68	0.0548136		-0.09
	26508	4.65472
