# Supplementary material for: Interaction Wave Functions and Interaction-Based Coherence and Entanglement in Complex Adaptive Systems
Source: Research Square preprint supplement (doi:10.21203/rs.3.rs-6846233/v1), 2025-06-16
Supplement: Supplementary file 125 [file 30602-06.xls]

## Sheet: Sheet1
0.18				2		2	0.36	1.07537e-05
0.17				11		11	1.87	5.91452e-05
0.16				0		0	0	0
0.15	662			0		662	99.3	0.00355947
0.14	60	310		0		370	51.8	0.00198943
0.13	310	0		0		310	40.3	0.00166682
0.12	0	0		8		8	0.96	4.30147e-05
0.11	23	0		0		23	2.53	0.000123667
0.1	1412	229		1		1642	164.2	0.00882876
0.09	145	160		0	5720	6025	542.25	0.0323954
0.08	118	565		68	922	1673	133.84	0.00899545
0.07	216	568		34	775	1593	111.51	0.0085653
0.06	0	600		29	676	1305	78.3	0.00701677
0.05	1453	1229		174	3970	6826	341.3	0.0367023
0.04	3481	162		169	1862	5674	226.96	0.0305082
0.03	10005	731	8099	678	239	19752	592.56	0.106203
0.02	8057	2303	9978	9372	1958	31668	633.36	0.170274
0.01	4014	4091	1930	84	2561	12680	126.8	0.0681783
-3.1225e-17	7429	1522	11251	425	467	21094	-6.58661e-13	0.113419
-0.01	5116	4644	470	761	1836	12827	-128.27	0.0689687
-0.02	12664	111	605	760	2594	16734	-334.68	0.089976
-0.03	1992	1097	519	1702	124	5434	-163.02	0.0292177
-0.04	292	1614	537	84	1970	4497	-179.88	0.0241796
-0.05	427	2710	238	943	15261	19579	-978.95	0.105273
-0.06	1225	1414	584	0	544	3767	-226.02	0.0202545
-0.07	114	162	83	577	4	940	-65.8	0.00505423
-0.08	79		281	416	43	819	-65.52	0.00440363
-0.09	20		587		45	652	-58.68	0.0035057
-0.1	1259		169		0	1428	-142.8	0.00767812
-0.11	0		690		340	1030	-113.3	0.00553814
-0.12	0		526		0	526	-63.12	0.00282822
-0.13	472		431		0	903	-117.39	0.00485528
-0.14	0		1485		146	1631	-228.34	0.00876962
-0.15	3047		203		302	3552	-532.8	0.0190985
-0.16					346	346	-55.36	0.00186039
						185983	-0.00164386
