# Supplementary material for: Interaction Wave Functions and Interaction-Based Coherence and Entanglement in Complex Adaptive Systems
Source: Research Square preprint supplement (doi:10.21203/rs.3.rs-6846233/v1), 2025-06-16
Supplement: Supplementary file 126 [file 30602.xls]

## Sheet: Sheet1
13.35	662	8837.7	0.0103289		0.15
13.34	60	800.4	0.000936154		0.14
13.33	310	4132.3	0.0048368		0.13
13.32	0	0	0		0.12
13.31	23	306.13	0.000358859		0.11
13.3	1412	18779.6	0.0220308		0.1
13.29	145	1927.05	0.00226237		0.09
13.28	118	1567.04	0.0018411		0.08
13.27	216	2866.32	0.00337016		0.07
13.26	0	0	0		0.06
13.25	1453	19252.3	0.0226705		0.05
13.24	3481	46088.4	0.0543126		0.04
13.23	10005	132366	0.156104		0.03
13.22	8057	106514	0.12571		0.02
13.21	4014	53024.9	0.0626287		0.01
13.2	7429	98062.8	0.115912		0
13.19	5116	67480	0.0798228		-0.01
13.18	12664	166912	0.197591		-0.02
13.17	1992	26234.6	0.0310803		-0.03
13.16	292	3842.72	0.00455595		-0.04
13.15	427	5615.05	0.0066623		-0.05
13.14	1225	16096.5	0.0191131		-0.06
13.13	114	1496.82	0.00177869		-0.07
13.12	79	1036.48	0.0012326		-0.08
13.11	20	262.2	0.000312051		-0.09
13.1	1259	16492.9	0.0196436		-0.1
13.09	0	0	0		-0.11
13.08	0	0	0		-0.12
13.07	472	6169.04	0.00736441		-0.13
13.06	0	0	0		-0.14
13.05	3047	39763.4	0.047541		-0.15
	64092	13.1986
