# Supplementary material for: Interaction Wave Functions and Interaction-Based Coherence and Entanglement in Complex Adaptive Systems
Source: Research Square preprint supplement (doi:10.21203/rs.3.rs-6846233/v1), 2025-06-16
Supplement: Supplementary file 127 [file 30603.xls]

## Sheet: Sheet1
13.24	310	4104.4	0.0127983		0.14
13.23	0	0	0		0.13
13.22	0	0	0		0.12
13.21	0	0	0		0.11
13.2	229	3022.8	0.00945422		0.1
13.19	160	2110.4	0.00660557		0.09
13.18	565	7446.7	0.0233259		0.08
13.17	568	7480.56	0.0234498		0.07
13.16	600	7896	0.0247709		0.06
13.15	1229	16161.4	0.050739		0.05
13.14	162	2128.68	0.00668813		0.04
13.13	731	9598.03	0.0301792		0.03
13.12	2303	30215.4	0.0950789		0.02
13.11	4091	53633	0.168896		0.01
13.1	1522	19938.2	0.0628354		0
13.09	4644	60790	0.191727		-0.01
13.08	111	1451.88	0.00458261		-0.02
13.07	1097	14337.8	0.0452894		-0.03
13.06	1614	21078.8	0.0666336		-0.04
13.05	2710	35365.5	0.111882		-0.05
13.04	1414	18438.6	0.0583767		-0.06
13.03	162	2110.86	0.00668813		-0.07
	24222	13.1
