# Supplementary material for: Interaction Wave Functions and Interaction-Based Coherence and Entanglement in Complex Adaptive Systems
Source: Research Square preprint supplement (doi:10.21203/rs.3.rs-6846233/v1), 2025-06-16
Supplement: Supplementary file 128 [file 30604.xls]

## Sheet: Sheet1
13.17	8099	106664	0.209461		0.03
13.16	9978	131310	0.258056		0.02
13.15	1930	25379.5	0.0499147		0.01
13.14	11251	147838	0.290979		0
13.13	470	6171.1	0.0121554		-0.01
13.12	605	7937.6	0.0156468		-0.02
13.11	519	6804.09	0.0134226		-0.03
13.1	537	7034.7	0.0138882		-0.04
13.09	238	3115.42	0.00615528		-0.05
13.08	584	7638.72	0.0151037		-0.06
13.07	83	1084.81	0.00214659		-0.07
13.06	281	3669.86	0.00726737		-0.08
13.05	587	7660.35	0.0151813		-0.09
13.04	169	2203.76	0.00437077		-0.1
13.03	690	8990.7	0.0178451		-0.11
13.02	526	6848.52	0.0136037		-0.12
13.01	431	5607.31	0.0111467		-0.13
13	1485	19305	0.0384058		-0.14
12.99	203	2636.97	0.00525009		-0.15
	38666	13.1356
