# Supplementary material for: Interaction Wave Functions and Interaction-Based Coherence and Entanglement in Complex Adaptive Systems
Source: Research Square preprint supplement (doi:10.21203/rs.3.rs-6846233/v1), 2025-06-16
Supplement: Supplementary file 129 [file 30605.xls]

## Sheet: Sheet1
13.11	2	26.22	0.000122714		0.18
13.1	11	144.1	0.000674929		0.17
13.09	0	0	0		0.16
13.08	0	0	0		0.15
13.07	0	0	0		0.14
13.06	0	0	0		0.13
13.05	8	104.4	0.000490858		0.12
13.04	0	0	0		0.11
13.03	1	13.03	6.13572e-05		0.1
13.02	0	0	0		0.09
13.01	68	884.68	0.00417229		0.08
13	34	442	0.00208615		0.07
12.99	29	376.71	0.00177936		0.06
12.98	174	2258.52	0.0106762		0.05
12.97	169	2191.93	0.0103694		0.04
12.96	678	8786.88	0.0416002		0.03
12.95	9372	121367	0.57504		0.02
12.94	84	1086.96	0.00515401		0.01
12.93	425	5495.25	0.0260768		0
12.92	761	9832.12	0.0466928		-0.01
12.91	760	9811.6	0.0466315		-0.02
12.9	1702	21955.8	0.10443		-0.03
12.89	84	1082.76	0.00515401		-0.04
12.88	943	12145.8	0.0578599		-0.05
12.87	0	0	0		-0.06
12.86	577	7420.22	0.0354031		-0.07
12.85	416	5345.6	0.0255246		-0.08
	16298	12.9324
