# Supplementary material for: Interaction Wave Functions and Interaction-Based Coherence and Entanglement in Complex Adaptive Systems
Source: Research Square preprint supplement (doi:10.21203/rs.3.rs-6846233/v1), 2025-06-16
Supplement: Supplementary file 130 [file 30606.xls]

## Sheet: Sheet1
13.05	5720	74646	0.133942		0.09
13.04	922	12022.9	0.02159		0.08
13.03	775	10098.2	0.0181478		0.07
13.02	676	8801.52	0.0158295		0.06
13.01	3970	51649.7	0.0929634		0.05
13	1862	24206	0.0436015		0.04
12.99	239	3104.61	0.00559653		0.03
12.98	1958	25414.8	0.0458494		0.02
12.97	2561	33216.2	0.0599696		0.01
12.96	467	6052.32	0.0109355		0
12.95	1836	23776.2	0.0429926		-0.01
12.94	2594	33566.4	0.0607423		-0.02
12.93	124	1603.32	0.00290364		-0.03
12.92	1970	25452.4	0.0461304		-0.04
12.91	15261	197020	0.357359		-0.05
12.9	544	7017.6	0.0127386		-0.06
12.89	4	51.56	9.36658e-05		-0.07
12.88	43	553.84	0.00100691		-0.08
12.87	45	579.15	0.00105374		-0.09
12.86	0	0	0		-0.1
12.85	340	4369	0.0079616		-0.11
12.84	0	0	0		-0.12
12.83	0	0	0		-0.13
12.82	146	1871.72	0.0034188		-0.14
12.81	302	3868.62	0.00707177		-0.15
12.8	346	4428.8	0.0081021		-0.16
	42705	12.958
