# Supplementary material for: Interaction Wave Functions and Interaction-Based Coherence and Entanglement in Complex Adaptive Systems
Source: Research Square preprint supplement (doi:10.21203/rs.3.rs-6846233/v1), 2025-06-16
Supplement: Supplementary file 131 [file 30609-13.xls]

## Sheet: Sheet1
0.17	150					150	25.5	0.000482329
0.16	167					167	26.72	0.000536993
0.15	0					0	0	0
0.14	0					0	0	0
0.13	0					0	0	0
0.12	207					207	24.84	0.000665614
0.11	65					65	7.15	0.000209009
0.1	0					0	0	0
0.09	8					8	0.72	2.57242e-05
0.08	52	14				66	5.28	0.000212225
0.07	79	0				79	5.53	0.000254027
0.06	24	564				588	35.28	0.00189073
0.05	37	11		46		94	4.7	0.00030226
0.04	1	8		167	295	471	18.84	0.00151451
0.03	0	132	115	56	166	469	14.07	0.00150808
0.02	276	99	298	501	14484	15658	313.16	0.0503487
0.01	193	54324	1193	24728	17301	97739	977.39	0.314282
0	266	2496	53482	31094	13381	100719	0	0.323865
-0.01	496	11352	27525	18251	4400	62024	-620.24	0.19944
-0.02	212	958	3443	2324	10895	17832	-356.64	0.0573393
-0.03	846	0	690	24	2657	4217	-126.51	0.0135599
-0.04	14	266	0	1600	299	2179	-87.16	0.00700663
-0.05	56	24	852	732	807	2471	-123.55	0.00794557
-0.06	28	5172				5200	-312	0.0167207
-0.07	205	28				233	-16.31	0.000749218
-0.08	125					125	-10	0.000401941
-0.09	18					18	-1.62	5.78795e-05
-0.1	3					3	-0.3	9.64658e-06
-0.11	5					5	-0.55	1.60776e-05
-0.12	106					106	-12.72	0.000340846
-0.13	98					98	-12.74	0.000315122
						310991	-0.000711146
