# Supplementary material for: Interaction Wave Functions and Interaction-Based Coherence and Entanglement in Complex Adaptive Systems
Source: Research Square preprint supplement (doi:10.21203/rs.3.rs-6846233/v1), 2025-06-16
Supplement: Supplementary file 132 [file 30609.xls]

## Sheet: Sheet1
13	150	1950	0.0401391		0.17
12.99	167	2169.33	0.0446883		0.16
12.98	0	0	0		0.15
12.97	0	0	0		0.14
12.96	0	0	0		0.13
12.95	207	2680.65	0.055392		0.12
12.94	65	841.1	0.0173936		0.11
12.93	0	0	0		0.1
12.92	8	103.36	0.00214075		0.09
12.91	52	671.32	0.0139149		0.08
12.9	79	1019.1	0.02114		0.07
12.89	24	309.36	0.00642226		0.06
12.88	37	476.56	0.00990099		0.05
12.87	1	12.87	0.000267594		0.04
12.86	0	0	0		0.03
12.85	276	3546.6	0.073856		0.02
12.84	193	2478.12	0.0516457		0.01
12.83	266	3412.78	0.0711801		0
12.82	496	6358.72	0.132727		-0.01
12.81	212	2715.72	0.05673		-0.02
12.8	846	10828.8	0.226385		-0.03
12.79	14	179.06	0.00374632		-0.04
12.78	56	715.68	0.0149853		-0.05
12.77	28	357.56	0.00749264		-0.06
12.76	205	2615.8	0.0548568		-0.07
12.75	125	1593.75	0.0334493		-0.08
12.74	18	229.32	0.0048167		-0.09
12.73	3	38.19	0.000802783		-0.1
12.72	5	63.6	0.00133797		-0.11
12.71	106	1347.26	0.028365		-0.12
12.7	98	1244.6	0.0262242		-0.13
	3737	12.8336
