# Supplementary material for: Interaction Wave Functions and Interaction-Based Coherence and Entanglement in Complex Adaptive Systems
Source: Research Square preprint supplement (doi:10.21203/rs.3.rs-6846233/v1), 2025-06-16
Supplement: Supplementary file 133 [file 30610.xls]

## Sheet: Sheet1
12.9	14	180.6	0.000185558		0.08
12.89	0	0	0		0.07
12.88	564	7264.32	0.00747535		0.06
12.87	11	141.57	0.000145796		0.05
12.86	8	102.88	0.000106033		0.04
12.85	132	1696.2	0.00174955		0.03
12.84	99	1271.16	0.00131216		0.02
12.83	54324	696977	0.720019		0.01
12.82	2496	31998.7	0.0330824		0
12.81	11352	145419	0.150461		-0.01
12.8	958	12262.4	0.0126975		-0.02
12.79	0	0	0		-0.03
12.78	266	3399.48	0.00352561		-0.04
12.77	24	306.48	0.0003181		-0.05
12.76	5172	65994.7	0.0685505		-0.06
12.75	28	357	0.000371117		-0.07
	75448	12.8217
