# Supplementary material for: Interaction Wave Functions and Interaction-Based Coherence and Entanglement in Complex Adaptive Systems
Source: Research Square preprint supplement (doi:10.21203/rs.3.rs-6846233/v1), 2025-06-16
Supplement: Supplementary file 134 [file 30611.xls]

## Sheet: Sheet1
12.87	115	1480.05	0.00131282		0.03
12.86	298	3832.28	0.0034019		0.02
12.85	1193	15330	0.013619		0.01
12.84	53482	686709	0.610539		0
12.83	27525	353146	0.31422		-0.01
12.82	3443	44139.3	0.0393046		-0.02
12.81	690	8838.9	0.00787689		-0.03
12.8	0	0	0		-0.04
12.79	852	10897.1	0.00972625		-0.05
	87598	12.8356
