# Supplementary material for: Interaction Wave Functions and Interaction-Based Coherence and Entanglement in Complex Adaptive Systems
Source: Research Square preprint supplement (doi:10.21203/rs.3.rs-6846233/v1), 2025-06-16
Supplement: Supplementary file 135 [file 30612.xls]

## Sheet: Sheet1
12.9	46	593.4	0.000578449		0.05
12.89	167	2152.63	0.00210002		0.04
12.88	56	721.28	0.000704199		0.03
12.87	501	6447.87	0.00630006		0.02
12.86	24728	318002	0.310954		0.01
12.85	31094	399558	0.391006		0
12.84	18251	234343	0.229506		-0.01
12.83	2324	29816.9	0.0292242		-0.02
12.82	24	307.68	0.000301799		-0.03
12.81	1600	20496	0.02012		-0.04
12.8	732	9369.6	0.00920488		-0.05
	79523	12.8492
