# Supplementary material for: Interaction Wave Functions and Interaction-Based Coherence and Entanglement in Complex Adaptive Systems
Source: Research Square preprint supplement (doi:10.21203/rs.3.rs-6846233/v1), 2025-06-16
Supplement: Supplementary file 136 [file 30613.xls]

## Sheet: Sheet1
12.9	295	3805.5	0.00456056		0.04
12.89	166	2139.74	0.00256628		0.03
12.88	14484	186554	0.223916		0.02
12.87	17301	222664	0.267465		0.01
12.86	13381	172080	0.206864		0
12.85	4400	56540	0.068022		-0.01
12.84	10895	139892	0.168432		-0.02
12.83	2657	34089.3	0.041076		-0.03
12.82	299	3833.18	0.0046224		-0.04
12.81	807	10337.7	0.0124758		-0.05
	64685	12.8613
