# Supplementary material for: Interaction Wave Functions and Interaction-Based Coherence and Entanglement in Complex Adaptive Systems
Source: Research Square preprint supplement (doi:10.21203/rs.3.rs-6846233/v1), 2025-06-16
Supplement: Supplementary file 137 [file 30616-20.xls]

## Sheet: Sheet1
0.18					297	297		0.00118773
0.17					453	453		0.00181159
0.16					770	770		0.0030793
0.15					99	99		0.00039591
0.14					826	826		0.00330325
0.13					910	910		0.00363917
0.12					1002	1002		0.00400709
0.11		1			30783	30784		0.123108
0.1		0			2241	2241		0.00896196
0.09		15			3343	3358		0.0134289
0.08		0			32	32		0.000127971
0.07		0			0	0		0
0.06		52			1843	1895		0.00757827
0.05		34			150	184		0.000735832
0.04		35			1074	1109		0.00443499
0.03	15	673	50	52	242	1032		0.00412706
0.02	494	1486	262	10331	170	12743		0.0509604
0.01	481	1858	1975	7043	0	11357		0.0454176
-3.1225e-17	44145	37771	26674	1041	44	109675		0.4386
-0.01	5104	3049	12551	408	60	21172		0.0846687
-0.02	3965	22	945	873	23	5828		0.0233067
-0.03	174		568	1004	524	2270		0.00907793
-0.04			394	1977	18	2389		0.00955382
-0.05				1591	847	2438		0.00974978
-0.06				808	193	1001		0.00400309
-0.07					0	0		0
-0.08					115	115		0.000459895
-0.09					10	10		3.99909e-05
-0.1					4142	4142		0.0165642
-0.11					1667	1667		0.00666648
-0.12					27981	27981		0.111898
-0.13					789	789		0.00315528
-0.14					1453	1453		0.00581068
-0.15					35	35		0.000139968
						250057
