# Supplementary material for: Interaction Wave Functions and Interaction-Based Coherence and Entanglement in Complex Adaptive Systems
Source: Research Square preprint supplement (doi:10.21203/rs.3.rs-6846233/v1), 2025-06-16
Supplement: Supplementary file 138 [file 30616.xls]

## Sheet: Sheet1
12.88	15	193.2	0.000275847		0.03
12.87	494	6357.78	0.00908456		0.02
12.86	481	6185.66	0.00884549		0.01
12.85	44145	567263	0.811817		0
12.84	5104	65535.4	0.0938615		-0.01
12.83	3965	50871	0.0729155		-0.02
12.82	174	2230.68	0.00319982		-0.03
	54378	12.8478
