# Supplementary material for: Interaction Wave Functions and Interaction-Based Coherence and Entanglement in Complex Adaptive Systems
Source: Research Square preprint supplement (doi:10.21203/rs.3.rs-6846233/v1), 2025-06-16
Supplement: Supplementary file 139 [file 30617.xls]

## Sheet: Sheet1
12.95	1	12.95	2.22242e-05		0.11
12.94	0	0	0		0.1
12.93	15	193.95	0.000333363		0.09
12.92	0	0	0		0.08
12.91	0	0	0		0.07
12.9	52	670.8	0.00115566		0.06
12.89	34	438.26	0.000755623		0.05
12.88	35	450.8	0.000777847		0.04
12.87	673	8661.51	0.0149569		0.03
12.86	1486	19110	0.0330252		0.02
12.85	1858	23875.3	0.0412926		0.01
12.84	37771	484980	0.83943		0
12.83	3049	39118.7	0.0677616		-0.01
12.82	22	282.04	0.000488932		-0.02
	44996	12.841
