# Supplementary material for: Interaction Wave Functions and Interaction-Based Coherence and Entanglement in Complex Adaptive Systems
Source: Research Square preprint supplement (doi:10.21203/rs.3.rs-6846233/v1), 2025-06-16
Supplement: Supplementary file 140 [file 30618.xls]

## Sheet: Sheet1
12.89	50	644.5	0.00115157		0.03
12.88	262	3374.56	0.00603422		0.02
12.87	1975	25418.3	0.045487		0.01
12.86	26674	343028	0.614339		0
12.85	12551	161280	0.289067		-0.01
12.84	945	12133.8	0.0217647		-0.02
12.83	568	7287.44	0.0130818		-0.03
12.82	394	5051.08	0.00907437		-0.04
	43419	12.8565
