# Supplementary material for: Interaction Wave Functions and Interaction-Based Coherence and Entanglement in Complex Adaptive Systems
Source: Research Square preprint supplement (doi:10.21203/rs.3.rs-6846233/v1), 2025-06-16
Supplement: Supplementary file 141 [file 30619.xls]

## Sheet: Sheet1
12.88	52	669.76	0.0020694		0.03
12.87	10331	132960	0.411135		0.02
12.86	7043	90573	0.280285		0.01
12.85	1041	13376.9	0.0414279		0
12.84	408	5238.72	0.0162369		-0.01
12.83	873	11200.6	0.0347421		-0.02
12.82	1004	12871.3	0.0399554		-0.03
12.81	1977	25325.4	0.0786772		-0.04
12.8	1591	20364.8	0.0633158		-0.05
12.79	808	10334.3	0.0321554		-0.06
	25128	12.8508
