# Supplementary material for: Interaction Wave Functions and Interaction-Based Coherence and Entanglement in Complex Adaptive Systems
Source: Research Square preprint supplement (doi:10.21203/rs.3.rs-6846233/v1), 2025-06-16
Supplement: Supplementary file 142 [file 30620.xls]

## Sheet: Sheet1
13.14	297	3902.58	0.00361595		0.18
13.13	453	5947.89	0.00551524		0.17
13.12	770	10102.4	0.0093747		0.16
13.11	99	1297.89	0.00120532		0.15
13.1	826	10820.6	0.0100565		0.14
13.09	910	11911.9	0.0110792		0.13
13.08	1002	13106.2	0.0121993		0.12
13.07	30783	402334	0.374781		0.11
13.06	2241	29267.5	0.027284		0.1
13.05	3343	43626.2	0.0407008		0.09
13.04	32	417.28	0.000389598		0.08
13.03	0	0	0		0.07
13.02	1843	23995.9	0.0224384		0.06
13.01	150	1951.5	0.00182624		0.05
13	1074	13962	0.0130759		0.04
12.99	242	3143.58	0.00294633		0.03
12.98	170	2206.6	0.00206974		0.02
12.97	0	0	0		0.01
12.96	44	570.24	0.000535697		0
12.95	60	777	0.000730496		-0.01
12.94	23	297.62	0.000280023		-0.02
12.93	524	6775.32	0.00637966		-0.03
12.92	18	232.56	0.000219149		-0.04
12.91	847	10934.8	0.0103122		-0.05
12.9	193	2489.7	0.00234976		-0.06
12.89	0	0	0		-0.07
12.88	115	1481.2	0.00140012		-0.08
12.87	10	128.7	0.000121749		-0.09
12.86	4142	53266.1	0.0504286		-0.1
12.85	1667	21421	0.0202956		-0.11
12.84	27981	359276	0.340667		-0.12
12.83	789	10122.9	0.00960602		-0.13
12.82	1453	18627.5	0.0176902		-0.14
12.81	35	448.35	0.000426123		-0.15
	82136	12.9644
