# Supplementary material for: Interaction Wave Functions and Interaction-Based Coherence and Entanglement in Complex Adaptive Systems
Source: Research Square preprint supplement (doi:10.21203/rs.3.rs-6846233/v1), 2025-06-16
Supplement: Supplementary file 143 [file 30623-27.xls]

## Sheet: Sheet1
0.18					801	801	144.18	0.00312236
0.17					0	0	0	0
0.16					643	643	102.88	0.00250646
0.15					285	285	42.75	0.00111095
0.14					0	0	0	0
0.13					0	0	0	0
0.12		359			396	755	90.6	0.00294305
0.11		107	74		2618	2799	307.89	0.0109107
0.1		923	0		256	1179	117.9	0.00459583
0.09	5041	435	0		1488	6964	626.76	0.0271462
0.08	431	805	56		1098	2390	191.2	0.00931639
0.07	9023	1294	2692	56	553	13618	953.26	0.053084
0.06	812	989	13	717	928	3459	207.54	0.0134834
0.05	527	1299	233	0	1895	3954	197.7	0.015413
0.04	15787	784	4047	9324	973	30915	1236.6	0.120509
0.03	2276	2981	3641	4685	3151	16734	502.02	0.0652304
0.02	318	696	4020	769	5695	11498	229.96	0.04482
0.01	1773	420	16477	294	1198	20162	201.62	0.078593
-3.1225e-17	1420	677	3195	1853	990	8135	-2.54016e-13	0.0317108
-0.01	2961	821	40306	27372	195	71655	-716.55	0.279316
-0.02	986	295	1190	2226	770	5467	-109.34	0.0213108
-0.03	338	573	503	2160	2733	6307	-189.21	0.0245851
-0.04	6830	8143			302	15275	-611	0.0595431
-0.05	43	971			1694	2708	-135.4	0.010556
-0.06	135	1288			608	2031	-121.86	0.00791699
-0.07	1479	370			1413	3262	-228.34	0.0127155
-0.08	35				1223	1258	-100.64	0.00490378
-0.09	1593				2261	3854	-346.86	0.0150232
-0.1	43				4319	4362	-436.2	0.0170034
-0.11	12842				923	13765	-1514.15	0.053657
-0.12	501				878	1379	-165.48	0.00537544
-0.13					521	521	-67.73	0.0020309
-0.14					9	9	-1.26	3.50827e-05
-0.15					393	393	-58.95	0.00153194
						256537	0.0013639
