# Supplementary material for: Interaction Wave Functions and Interaction-Based Coherence and Entanglement in Complex Adaptive Systems
Source: Research Square preprint supplement (doi:10.21203/rs.3.rs-6846233/v1), 2025-06-16
Supplement: Supplementary file 144 [file 30623.xls]

## Sheet: Sheet1
13.11	5041	66087.5	0.0773231		0.09
13.1	431	5646.1	0.00661104		0.08
13.09	9023	118111	0.138402		0.07
13.08	812	10621	0.0124551		0.06
13.07	527	6887.89	0.00808357		0.05
13.06	15787	206178	0.242154		0.04
13.05	2276	29701.8	0.0349112		0.03
13.04	318	4146.72	0.00487775		0.02
13.03	1773	23102.2	0.0271958		0.01
13.02	1420	18488.4	0.0217811		0
13.01	2961	38522.6	0.0454183		-0.01
13	986	12818	0.0151241		-0.02
12.99	338	4390.62	0.00518453		-0.03
12.98	6830	88653.4	0.104764		-0.04
12.97	43	557.71	0.00065957		-0.05
12.96	135	1749.6	0.00207074		-0.06
12.95	1479	19153.1	0.0226861		-0.07
12.94	35	452.9	0.000536859		-0.08
12.93	1593	20597.5	0.0244348		-0.09
12.92	43	555.56	0.00065957		-0.1
12.91	12842	165790	0.196981		-0.11
12.9	501	6462.9	0.00768476		-0.12
	65194	13.0177
