# Supplementary material for: Interaction Wave Functions and Interaction-Based Coherence and Entanglement in Complex Adaptive Systems
Source: Research Square preprint supplement (doi:10.21203/rs.3.rs-6846233/v1), 2025-06-16
Supplement: Supplementary file 145 [file 30624.xls]

## Sheet: Sheet1
13.01	359	4670.59	0.0148163		0.12
13	107	1391	0.00441601		0.11
12.99	923	11989.8	0.0380933		0.1
12.98	435	5646.3	0.017953		0.09
12.97	805	10440.9	0.0332233		0.08
12.96	1294	16770.2	0.0534049		0.07
12.95	989	12807.6	0.0408172		0.06
12.94	1299	16809.1	0.0536112		0.05
12.93	784	10137.1	0.0323566		0.04
12.92	2981	38514.5	0.123029		0.03
12.91	696	8985.36	0.0287247		0.02
12.9	420	5418	0.0173339		0.01
12.89	677	8726.53	0.0279406		0
12.88	821	10574.5	0.0338836		-0.01
12.87	295	3796.65	0.012175		-0.02
12.86	573	7368.78	0.0236484		-0.03
12.85	8143	104638	0.336071		-0.04
12.84	971	12467.6	0.0400743		-0.05
12.83	1288	16525	0.0531572		-0.06
12.82	370	4743.4	0.0152703		-0.07
	24230	12.894
