# Supplementary material for: Interaction Wave Functions and Interaction-Based Coherence and Entanglement in Complex Adaptive Systems
Source: Research Square preprint supplement (doi:10.21203/rs.3.rs-6846233/v1), 2025-06-16
Supplement: Supplementary file 146 [file 30625.xls]

## Sheet: Sheet1
12.96	74	959.04	0.000967991		0.11
12.95	0	0	0		0.1
12.94	0	0	0		0.09
12.93	56	724.08	0.000732534		0.08
12.92	2692	34780.6	0.0352139		0.07
12.91	13	167.83	0.000170052		0.06
12.9	233	3005.7	0.00304786		0.05
12.89	4047	52165.8	0.0529386		0.04
12.88	3641	46896.1	0.0476278		0.03
12.87	4020	51737.4	0.0525855		0.02
12.86	16477	211894	0.215535		0.01
12.85	3195	41055.8	0.0417937		0
12.84	40306	517529	0.527241		-0.01
12.83	1190	15267.7	0.0155663		-0.02
12.82	503	6448.46	0.00657972		-0.03
	76447	12.8538
