# Supplementary material for: Interaction Wave Functions and Interaction-Based Coherence and Entanglement in Complex Adaptive Systems
Source: Research Square preprint supplement (doi:10.21203/rs.3.rs-6846233/v1), 2025-06-16
Supplement: Supplementary file 147 [file 30626.xls]

## Sheet: Sheet1
12.93	56	724.08	0.00113232		0.07
12.92	717	9263.64	0.0144977		0.06
12.91	0	0	0		0.05
12.9	9324	120280	0.188531		0.04
12.89	4685	60389.7	0.0947307		0.03
12.88	769	9904.72	0.0155492		0.02
12.87	294	3783.78	0.00594468		0.01
12.86	1853	23829.6	0.0374676		0
12.85	27372	351730	0.553462		-0.01
12.84	2226	28581.8	0.0450097		-0.02
12.83	2160	27712.8	0.0436752		-0.03
	49456	12.864
