# Supplementary material for: Interaction Wave Functions and Interaction-Based Coherence and Entanglement in Complex Adaptive Systems
Source: Research Square preprint supplement (doi:10.21203/rs.3.rs-6846233/v1), 2025-06-16
Supplement: Supplementary file 148 [file 30627.xls]

## Sheet: Sheet1
13.15	801	10533.1	0.019437		0.18
13.14	0	0	0		0.17
13.13	643	8442.59	0.015603		0.16
13.12	285	3739.2	0.0069158		0.15
13.11	0	0	0		0.14
13.1	0	0	0		0.13
13.09	396	5183.64	0.00960932		0.12
13.08	2618	34243.4	0.0635283		0.11
13.07	256	3345.92	0.00621208		0.1
13.06	1488	19433.3	0.0361077		0.09
13.05	1098	14328.9	0.026644		0.08
13.04	553	7211.12	0.0134191		0.07
13.03	928	12091.8	0.0225188		0.06
13.02	1895	24672.9	0.045984		0.05
13.01	973	12658.7	0.0236108		0.04
13	3151	40963	0.076462		0.03
12.99	5695	73978.1	0.138195		0.02
12.98	1198	15550	0.0290706		0.01
12.97	990	12840.3	0.0240233		0
12.96	195	2527.2	0.00473186		-0.01
12.95	770	9971.5	0.0186848		-0.02
12.94	2733	35365	0.0663189		-0.03
12.93	302	3904.86	0.00732832		-0.04
12.92	1694	21886.5	0.0411065		-0.05
12.91	608	7849.28	0.0147537		-0.06
12.9	1413	18227.7	0.0342878		-0.07
12.89	1223	15764.5	0.0296773		-0.08
12.88	2261	29121.7	0.0548653		-0.09
12.87	4319	55585.5	0.104805		-0.1
12.86	923	11869.8	0.0223975		-0.11
12.85	878	11282.3	0.0213055		-0.12
12.84	521	6689.64	0.0126426		-0.13
12.83	9	115.47	0.000218394		-0.14
12.82	393	5038.26	0.00953652		-0.15
	41210	12.9681
