# Supplementary material for: Interaction Wave Functions and Interaction-Based Coherence and Entanglement in Complex Adaptive Systems
Source: Research Square preprint supplement (doi:10.21203/rs.3.rs-6846233/v1), 2025-06-16
Supplement: Supplementary file 149 [file 30630.xls]

## Sheet: Sheet1
13.05	78	1017.9	0.0103682		0.19
13.04	23	299.92	0.00305729		0.18
13.03	0	0	0		0.17
13.02	3	39.06	0.000398777		0.16
13.01	164	2133.64	0.0217998		0.15
13	30	390	0.00398777		0.14
12.99	0	0	0		0.13
12.98	62	804.76	0.00824139		0.12
12.97	17	220.49	0.00225974		0.11
12.96	62	803.52	0.00824139		0.1
12.95	0	0	0		0.09
12.94	297	3843.18	0.0394789		0.08
12.93	33	426.69	0.00438655		0.07
12.92	249	3217.08	0.0330985		0.06
12.91	112	1445.92	0.0148877		0.05
12.9	1317	16989.3	0.175063		0.04
12.89	417	5375.13	0.05543		0.03
12.88	386	4971.68	0.0513093		0.02
12.87	0	0	0		0.01
12.86	0	0	0		0
12.85	655	8416.75	0.0870663		-0.01
12.84	0	0	0		-0.02
12.83	114	1462.62	0.0151535		-0.03
12.82	1651	21165.8	0.21946		-0.04
12.81	1138	14577.8	0.151269		-0.05
12.8	605	7744	0.08042		-0.06
12.79	0	0	0		-0.07
12.78	0	0	0		-0.08
12.77	0	0	0		-0.09
12.76	0	0	0		-0.1
12.75	110	1402.5	0.0146218		-0.11
	7523	12.8603
