# Supplementary material for: Interaction Wave Functions and Interaction-Based Coherence and Entanglement in Complex Adaptive Systems
Source: Research Square preprint supplement (doi:10.21203/rs.3.rs-6846233/v1), 2025-06-16
Supplement: Supplementary file 150 [file 30602-06.xls]

## Sheet: Sheet1
0.17	518					518	88.06	0.00735879
0.16	0					0	0	0
0.15	0	45				45	6.75	0.000639277
0.14	0	66				66	9.24	0.000937607
0.13	914	257				1171	152.23	0.0166354
0.12	774	539				1313	157.56	0.0186527
0.11	323	184				507	55.77	0.00720252
0.1	713	426	154	297		1590	159	0.0225878
0.09	245	144	1157	375		1921	172.89	0.02729
0.08	530	304	555	578	256	2223	177.84	0.0315803
0.07	484	781	588	260	447	2560	179.2	0.0363678
0.06	41	113	127	1126	540	1947	116.82	0.0276594
0.05	111	494	33	339	908	1885	94.25	0.0267786
0.04	152	182	543	1232	2821	4930	197.2	0.0700364
0.03	2	1784	398	1145	1361	4690	140.7	0.0666269
0.02	76	495	200	547	527	1845	36.9	0.0262104
0.01	542	738	211	1718	347	3556	35.56	0.0505171
0	115	965	590	1344	179	3193	0	0.0453603
-0.01	338	1109	1164	3374	168	6153	-61.53	0.0874105
-0.02	0	366	562	4476	942	6346	-126.92	0.0901523
-0.03	154	872	517	933	131	2607	-78.21	0.0370355
-0.04	576	441	779	801	278	2875	-115	0.0408427
-0.05	783	762	980	1099	363	3987	-199.35	0.05664
-0.06	1121	464	431	586	253	2855	-171.3	0.0405586
-0.07	1090	387	37	888	985	3387	-237.09	0.0481163
-0.08	1390	879	368	10	713	3360	-268.8	0.0477327
-0.09	929	273	459		516	2177	-195.93	0.0309268
-0.1	238	602	393		472	1705	-170.5	0.0242215
-0.11	283	251	393		42	969	-106.59	0.0137658
-0.12			11			11	-1.32	0.000156268
						70392	0.000673798
