# Supplementary material for: Interaction Wave Functions and Interaction-Based Coherence and Entanglement in Complex Adaptive Systems
Source: Research Square preprint supplement (doi:10.21203/rs.3.rs-6846233/v1), 2025-06-16
Supplement: Supplementary file 151 [file 30602.xls]

## Sheet: Sheet1
7.25	518	3755.5	0.0416332		0.17
7.24	0	0	0		0.16
7.23	0	0	0		0.15
7.22	0	0	0		0.14
7.21	914	6589.94	0.0734609		0.13
7.2	774	5572.8	0.0622086		0.12
7.19	323	2322.37	0.0259605		0.11
7.18	713	5119.34	0.0573059		0.1
7.17	245	1756.65	0.0196914		0.09
7.16	530	3794.8	0.0425977		0.08
7.15	484	3460.6	0.0389005		0.07
7.14	41	292.74	0.00329529		0.06
7.13	111	791.43	0.0089214		0.05
7.12	152	1082.24	0.0122167		0.04
7.11	2	14.22	0.000160746		0.03
7.1	76	539.6	0.00610834		0.02
7.09	542	3842.78	0.0435621		0.01
7.08	115	814.2	0.00924289		0
7.07	338	2389.66	0.0271661		-0.01
7.06	0	0	0		-0.02
7.05	154	1085.7	0.0123774		-0.03
7.04	576	4055.04	0.0462948		-0.04
7.03	783	5504.49	0.062932		-0.05
7.02	1121	7869.42	0.0900981		-0.06
7.01	1090	7640.9	0.0876065		-0.07
7	1390	9730	0.111718		-0.08
6.99	929	6493.71	0.0746665		-0.09
6.98	238	1661.24	0.0191288		-0.1
6.97	283	1972.51	0.0227455		-0.11
	12442	7.08502
