# Supplementary material for: Interaction Wave Functions and Interaction-Based Coherence and Entanglement in Complex Adaptive Systems
Source: Research Square preprint supplement (doi:10.21203/rs.3.rs-6846233/v1), 2025-06-16
Supplement: Supplementary file 152 [file 30603.xls]

## Sheet: Sheet1
7.28	45	327.6	0.00323206		0.15
7.27	66	479.82	0.00474036		0.14
7.26	257	1865.82	0.0184587		0.13
7.25	539	3907.75	0.0387129		0.12
7.24	184	1332.16	0.0132155		0.11
7.23	426	3079.98	0.0305969		0.1
7.22	144	1039.68	0.0103426		0.09
7.21	304	2191.84	0.0218344		0.08
7.2	781	5623.2	0.0560942		0.07
7.19	113	812.47	0.00811607		0.06
7.18	494	3546.92	0.0354809		0.05
7.17	182	1304.94	0.0130719		0.04
7.16	1784	12773.4	0.128133		0.03
7.15	495	3539.25	0.0355527		0.02
7.14	738	5269.32	0.0530058		0.01
7.13	965	6880.45	0.0693098		0
7.12	1109	7896.08	0.0796524		-0.01
7.11	366	2602.26	0.0262874		-0.02
7.1	872	6191.2	0.0626302		-0.03
7.09	441	3126.69	0.0316742		-0.04
7.08	762	5394.96	0.0547296		-0.05
7.07	464	3280.48	0.0333262		-0.06
7.06	387	2732.22	0.0277957		-0.07
7.05	879	6196.95	0.0631329		-0.08
7.04	273	1921.92	0.0196078		-0.09
7.03	602	4232.06	0.0432378		-0.1
7.02	251	1762.02	0.0180277		-0.11
	13923	7.13291
