# Supplementary material for: Interaction Wave Functions and Interaction-Based Coherence and Entanglement in Complex Adaptive Systems
Source: Research Square preprint supplement (doi:10.21203/rs.3.rs-6846233/v1), 2025-06-16
Supplement: Supplementary file 153 [file 30604.xls]

## Sheet: Sheet1
7.16	154	1102.64	0.0144601		0.1
7.15	1157	8272.55	0.108638		0.09
7.14	555	3962.7	0.0521127		0.08
7.13	588	4192.44	0.0552113		0.07
7.12	127	904.24	0.0119249		0.06
7.11	33	234.63	0.00309859		0.05
7.1	543	3855.3	0.0509859		0.04
7.09	398	2821.82	0.0373709		0.03
7.08	200	1416	0.0187793		0.02
7.07	211	1491.77	0.0198122		0.01
7.06	590	4165.4	0.0553991		0
7.05	1164	8206.2	0.109296		-0.01
7.04	562	3956.48	0.05277		-0.02
7.03	517	3634.51	0.0485446		-0.03
7.02	779	5468.58	0.0731455		-0.04
7.01	980	6869.8	0.0920188		-0.05
7	431	3017	0.0404695		-0.06
6.99	37	258.63	0.00347418		-0.07
6.98	368	2568.64	0.034554		-0.08
6.97	459	3199.23	0.0430986		-0.09
6.96	393	2735.28	0.0369014		-0.1
6.95	393	2731.35	0.0369014		-0.11
6.94	11	76.34	0.00103286		-0.12
	10650	7.05554
