# Supplementary material for: Interaction Wave Functions and Interaction-Based Coherence and Entanglement in Complex Adaptive Systems
Source: Research Square preprint supplement (doi:10.21203/rs.3.rs-6846233/v1), 2025-06-16
Supplement: Supplementary file 154 [file 30605.xls]

## Sheet: Sheet1
7.27	297	2159.19	0.0140572		0.1
7.26	375	2722.5	0.017749		0.09
7.25	578	4190.5	0.0273571		0.08
7.24	260	1882.4	0.0123059		0.07
7.23	1126	8140.98	0.0532942		0.06
7.22	339	2447.58	0.0160451		0.05
7.21	1232	8882.72	0.0583112		0.04
7.2	1145	8244	0.0541935		0.03
7.19	547	3932.93	0.0258898		0.02
7.18	1718	12335.2	0.0813139		0.01
7.17	1344	9636.48	0.0636123		0
7.16	3374	24157.8	0.159693		-0.01
7.15	4476	32003.4	0.211852		-0.02
7.14	933	6661.62	0.0441594		-0.03
7.13	801	5711.13	0.0379118		-0.04
7.12	1099	7824.88	0.0520163		-0.05
7.11	586	4166.46	0.0277357		-0.06
7.1	888	6304.8	0.0420295		-0.07
7.09	10	70.9	0.000473306		-0.08
	21128	7.16942
