# Supplementary material for: Interaction Wave Functions and Interaction-Based Coherence and Entanglement in Complex Adaptive Systems
Source: Research Square preprint supplement (doi:10.21203/rs.3.rs-6846233/v1), 2025-06-16
Supplement: Supplementary file 155 [file 30606.xls]

## Sheet: Sheet1
7.1	256	1817.6	0.0208997		0.08
7.09	447	3169.23	0.0364928		0.07
7.08	540	3823.2	0.0440852		0.06
7.07	908	6419.56	0.0741285		0.05
7.06	2821	19916.3	0.230305		0.04
7.05	1361	9595.05	0.111111		0.03
7.04	527	3710.08	0.0430239		0.02
7.03	347	2439.41	0.0283288		0.01
7.02	179	1256.58	0.0146134		0
7.01	168	1177.68	0.0137154		-0.01
7	942	6594	0.0769042		-0.02
6.99	131	915.69	0.0106948		-0.03
6.98	278	1940.44	0.0226957		-0.04
6.97	363	2530.11	0.0296351		-0.05
6.96	253	1760.88	0.0206547		-0.06
6.95	985	6845.75	0.0804147		-0.07
6.94	713	4948.22	0.0582088		-0.08
6.93	516	3575.88	0.0421259		-0.09
6.92	472	3266.24	0.0385338		-0.1
6.91	42	290.22	0.00342885		-0.11
	12249	7.02033
