# Supplementary material for: Interaction Wave Functions and Interaction-Based Coherence and Entanglement in Complex Adaptive Systems
Source: Research Square preprint supplement (doi:10.21203/rs.3.rs-6846233/v1), 2025-06-16
Supplement: Supplementary file 156 [file 30609-13.xls]

## Sheet: Sheet1
0.1	18		433	193		644	64.4	0.0138979
0.09	134		0	449		583	52.47	0.0125815
0.08	77		105	399		581	46.48	0.0125383
0.07	116	152	279	1568		2115	148.05	0.0456429
0.06	175	10	251	1113		1549	92.94	0.0334283
0.05	215	164	230	839	661	2109	105.45	0.0455134
0.04	690	139	404	1141	1399	3773	150.92	0.0814235
0.03	191	56	149	780	1652	2828	84.84	0.0610298
0.02	649	510	289	1318	1547	4313	86.26	0.093077
0.01	458	714	43	550	608	2373	23.73	0.0512107
0	762	552	111	438	779	2642	0	0.0570158
-0.01	545	651	767	1130	934	4027	-40.27	0.0869049
-0.02	16	330	540	1178	2133	4197	-83.94	0.0905736
-0.03	313	704	450	1134	1760	4361	-130.83	0.0941128
-0.04	587	53	331	1349	1839	4159	-166.36	0.0897536
-0.05	540	68	77	740	182	1607	-80.35	0.03468
-0.06	799	0	500	817		2116	-126.96	0.0456645
-0.07		0	218	610		828	-57.96	0.0178687
-0.08		10	147	344		501	-40.08	0.0108119
-0.09			172	654		826	-74.34	0.0178255
-0.1			89	40		129	-12.9	0.00278389
-0.11			61			61	-6.71	0.00131641
-0.12			16			16	-1.92	0.000345289
						46338	0.000710432
