# Supplementary material for: Interaction Wave Functions and Interaction-Based Coherence and Entanglement in Complex Adaptive Systems
Source: Research Square preprint supplement (doi:10.21203/rs.3.rs-6846233/v1), 2025-06-16
Supplement: Supplementary file 157 [file 30609.xls]

## Sheet: Sheet1
6.96	18	125.28	0.00286396		0.1
6.95	134	931.3	0.0213206		0.09
6.94	77	534.38	0.0122514		0.08
6.93	116	803.88	0.0184566		0.07
6.92	175	1211	0.0278441		0.06
6.91	215	1485.65	0.0342084		0.05
6.9	690	4761	0.109785		0.04
6.89	191	1315.99	0.0303898		0.03
6.88	649	4465.12	0.103262		0.02
6.87	458	3146.46	0.0728719		0.01
6.86	762	5227.32	0.121241		0
6.85	545	3733.25	0.0867144		-0.01
6.84	16	109.44	0.00254574		-0.02
6.83	313	2137.79	0.0498011		-0.03
6.82	587	4003.34	0.093397		-0.04
6.81	540	3677.4	0.0859189		-0.05
6.8	799	5433.2	0.127128		-0.06
	6285	6.85788
