# Supplementary material for: Interaction Wave Functions and Interaction-Based Coherence and Entanglement in Complex Adaptive Systems
Source: Research Square preprint supplement (doi:10.21203/rs.3.rs-6846233/v1), 2025-06-16
Supplement: Supplementary file 158 [file 30610.xls]

## Sheet: Sheet1
6.9	152	1048.8	0.036956		0.07
6.89	10	68.9	0.00243132		0.06
6.88	164	1128.32	0.0398736		0.05
6.87	139	954.93	0.0337953		0.04
6.86	56	384.16	0.0136154		0.03
6.85	510	3493.5	0.123997		0.02
6.84	714	4883.76	0.173596		0.01
6.83	552	3770.16	0.134209		0
6.82	651	4439.82	0.158279		-0.01
6.81	330	2247.3	0.0802334		-0.02
6.8	704	4787.2	0.171165		-0.03
6.79	53	359.87	0.012886		-0.04
6.78	68	461.04	0.0165329		-0.05
6.77	0	0	0		-0.06
6.76	0	0	0		-0.07
6.75	10	67.5	0.00243132		-0.08
	4113	6.83084
