# Supplementary material for: Interaction Wave Functions and Interaction-Based Coherence and Entanglement in Complex Adaptive Systems
Source: Research Square preprint supplement (doi:10.21203/rs.3.rs-6846233/v1), 2025-06-16
Supplement: Supplementary file 159 [file 30611.xls]

## Sheet: Sheet1
7.06	433	3056.98	0.0764747		0.1
7.05	0	0	0		0.09
7.04	105	739.2	0.0185447		0.08
7.03	279	1961.37	0.0492759		0.07
7.02	251	1762.02	0.0443306		0.06
7.01	230	1612.3	0.0406217		0.05
7	404	2828	0.0713529		0.04
6.99	149	1041.51	0.0263158		0.03
6.98	289	2017.22	0.051042		0.02
6.97	43	299.71	0.00759449		0.01
6.96	111	772.56	0.0196044		0
6.95	767	5330.65	0.135465		-0.01
6.94	540	3747.6	0.0953727		-0.02
6.93	450	3118.5	0.0794772		-0.03
6.92	331	2290.52	0.0584599		-0.04
6.91	77	532.07	0.0135994		-0.05
6.9	500	3450	0.088308		-0.06
6.89	218	1502.02	0.0385023		-0.07
6.88	147	1011.36	0.0259626		-0.08
6.87	172	1181.64	0.030378		-0.09
6.86	89	610.54	0.0157188		-0.1
6.85	61	417.85	0.0107736		-0.11
6.84	16	109.44	0.00282586		-0.12
	5662	6.95745
