# Supplementary material for: Interaction Wave Functions and Interaction-Based Coherence and Entanglement in Complex Adaptive Systems
Source: Research Square preprint supplement (doi:10.21203/rs.3.rs-6846233/v1), 2025-06-16
Supplement: Supplementary file 160 [file 30612.xls]

## Sheet: Sheet1
7.18	193	1385.74	0.011499		0.1
7.17	449	3219.33	0.0267517		0.09
7.16	399	2856.84	0.0237726		0.08
7.15	1568	11211.2	0.0934223		0.07
7.14	1113	7946.82	0.0663132		0.06
7.13	839	5982.07	0.0499881		0.05
7.12	1141	8123.92	0.0679814		0.04
7.11	780	5545.8	0.0464728		0.03
7.1	1318	9357.8	0.0785272		0.02
7.09	550	3899.5	0.0327693		0.01
7.08	438	3101.04	0.0260963		0
7.07	1130	7989.1	0.067326		-0.01
7.06	1178	8316.68	0.0701859		-0.02
7.05	1134	7994.7	0.0675643		-0.03
7.04	1349	9496.96	0.0803742		-0.04
7.03	740	5202.2	0.0440896		-0.05
7.02	817	5735.34	0.0486773		-0.06
7.01	610	4276.1	0.0363441		-0.07
7	344	2408	0.0204957		-0.08
6.99	654	4571.46	0.0389657		-0.09
6.98	40	279.2	0.00238322		-0.1
	16784	7.08412
