# Supplementary material for: Interaction Wave Functions and Interaction-Based Coherence and Entanglement in Complex Adaptive Systems
Source: Research Square preprint supplement (doi:10.21203/rs.3.rs-6846233/v1), 2025-06-16
Supplement: Supplementary file 161 [file 30613.xls]

## Sheet: Sheet1
7.2	661	4759.2	0.0489847		0.05
7.19	1399	10058.8	0.103676		0.04
7.18	1652	11861.4	0.122425		0.03
7.17	1547	11092	0.114644		0.02
7.16	608	4353.28	0.0450571		0.01
7.15	779	5569.85	0.0577294		0
7.14	934	6668.76	0.0692159		-0.01
7.13	2133	15208.3	0.15807		-0.02
7.12	1760	12531.2	0.130428		-0.03
7.11	1839	13075.3	0.136283		-0.04
7.1	182	1292.2	0.0134875		-0.05
	13494	7.14912
