# Supplementary material for: Interaction Wave Functions and Interaction-Based Coherence and Entanglement in Complex Adaptive Systems
Source: Research Square preprint supplement (doi:10.21203/rs.3.rs-6846233/v1), 2025-06-16
Supplement: Supplementary file 162 [file 30616-20.xls]

## Sheet: Sheet1
0.11				76		76	8.36	0.00303951
0.1				104		104	10.4	0.00415933
0.09				99		99	8.91	0.00395937
0.08		20		12	142	174	13.92	0.00695889
0.07		5		52	107	164	11.48	0.00655895
0.06	43	30	119	351	33	576	34.56	0.0230363
0.05	127	5	128	17	336	613	30.65	0.0245161
0.04	279	180	171	465	78	1173	46.92	0.0469125
0.03	391	272	296	118	5	1082	32.46	0.0432731
0.02	612	239	274	310	384	1819	36.38	0.0727484
0.01	1548	800	779	657	252	4036	40.36	0.161414
0	1643	563	687	216	212	3321	0	0.132819
-0.01	564	251	447	946	286	2494	-24.94	0.099744
-0.02	516	232	106	817	646	2317	-46.34	0.0926652
-0.03	763	903	409	793	1193	4061	-121.83	0.162414
-0.04	297	281	241	1156	306	2281	-91.24	0.0912254
-0.05	21		237	26	25	309	-15.45	0.012358
-0.06			199	46		245	-14.7	0.00979843
-0.07			60			60	-4.2	0.00239962
						25004	-0.00177172
