# Supplementary material for: Interaction Wave Functions and Interaction-Based Coherence and Entanglement in Complex Adaptive Systems
Source: Research Square preprint supplement (doi:10.21203/rs.3.rs-6846233/v1), 2025-06-16
Supplement: Supplementary file 163 [file 30616.xls]

## Sheet: Sheet1
7.15	43	307.45	0.00631981		0.06
7.14	127	906.78	0.0186655		0.05
7.13	279	1989.27	0.0410053		0.04
7.12	391	2783.92	0.0574662		0.03
7.11	612	4351.32	0.0899471		0.02
7.1	1548	10990.8	0.227513		0.01
7.09	1643	11648.9	0.241476		0
7.08	564	3993.12	0.0828924		-0.01
7.07	516	3648.12	0.0758377		-0.02
7.06	763	5386.78	0.11214		-0.03
7.05	297	2093.85	0.0436508		-0.04
7.04	21	147.84	0.00308642		-0.05
	6804	7.09114
