# Supplementary material for: Interaction Wave Functions and Interaction-Based Coherence and Entanglement in Complex Adaptive Systems
Source: Research Square preprint supplement (doi:10.21203/rs.3.rs-6846233/v1), 2025-06-16
Supplement: Supplementary file 164 [file 30617.xls]

## Sheet: Sheet1
7.12	20	142.4	0.00528961		0.08
7.11	5	35.55	0.0013224		0.07
7.1	30	213	0.00793441		0.06
7.09	5	35.45	0.0013224		0.05
7.08	180	1274.4	0.0476065		0.04
7.07	272	1923.04	0.0719386		0.03
7.06	239	1687.34	0.0632108		0.02
7.05	800	5640	0.211584		0.01
7.04	563	3963.52	0.148902		0
7.03	251	1764.53	0.0663846		-0.01
7.02	232	1628.64	0.0613594		-0.02
7.01	903	6330.03	0.238826		-0.03
7	281	1967	0.074319		-0.04
	3781	7.03647
