# Supplementary material for: Interaction Wave Functions and Interaction-Based Coherence and Entanglement in Complex Adaptive Systems
Source: Research Square preprint supplement (doi:10.21203/rs.3.rs-6846233/v1), 2025-06-16
Supplement: Supplementary file 165 [file 30618.xls]

## Sheet: Sheet1
7.05	119	838.95	0.028654		0.06
7.04	128	901.12	0.0308211		0.05
7.03	171	1202.13	0.0411751		0.04
7.02	296	2077.92	0.0712738		0.03
7.01	274	1920.74	0.0659764		0.02
7	779	5453	0.187575		0.01
6.99	687	4802.13	0.165423		0
6.98	447	3120.06	0.107633		-0.01
6.97	106	738.82	0.0255237		-0.02
6.96	409	2846.64	0.098483		-0.03
6.95	241	1674.95	0.0580303		-0.04
6.94	237	1644.78	0.0570672		-0.05
6.93	199	1379.07	0.0479172		-0.06
6.92	60	415.2	0.0144474		-0.07
	4153	6.98664
