# Supplementary material for: Interaction Wave Functions and Interaction-Based Coherence and Entanglement in Complex Adaptive Systems
Source: Research Square preprint supplement (doi:10.21203/rs.3.rs-6846233/v1), 2025-06-16
Supplement: Supplementary file 166 [file 30619.xls]

## Sheet: Sheet1
6.95	76	528.2	0.0121386		0.11
6.94	104	721.76	0.0166108		0.1
6.93	99	686.07	0.0158122		0.09
6.92	12	83.04	0.00191663		0.08
6.91	52	359.32	0.00830538		0.07
6.9	351	2421.9	0.0560613		0.06
6.89	17	117.13	0.00271522		0.05
6.88	465	3199.2	0.0742693		0.04
6.87	118	810.66	0.0188468		0.03
6.86	310	2126.6	0.0495129		0.02
6.85	657	4500.45	0.104935		0.01
6.84	216	1477.44	0.0344993		0
6.83	946	6461.18	0.151094		-0.01
6.82	817	5571.94	0.13049		-0.02
6.81	793	5400.33	0.126657		-0.03
6.8	1156	7860.8	0.184635		-0.04
6.79	26	176.54	0.00415269		-0.05
6.78	46	311.88	0.00734707		-0.06
	6261	6.83828
