# Supplementary material for: Interaction Wave Functions and Interaction-Based Coherence and Entanglement in Complex Adaptive Systems
Source: Research Square preprint supplement (doi:10.21203/rs.3.rs-6846233/v1), 2025-06-16
Supplement: Supplementary file 167 [file 30620.xls]

## Sheet: Sheet1
6.91	142	981.22	0.0354557		0.08
6.9	107	738.3	0.0267166		0.07
6.89	33	227.37	0.0082397		0.06
6.88	336	2311.68	0.0838951		0.05
6.87	78	535.86	0.0194757		0.04
6.86	5	34.3	0.00124844		0.03
6.85	384	2630.4	0.0958801		0.02
6.84	252	1723.68	0.0629213		0.01
6.83	212	1447.96	0.0529338		0
6.82	286	1950.52	0.0714107		-0.01
6.81	646	4399.26	0.161298		-0.02
6.8	1193	8112.4	0.297878		-0.03
6.79	306	2077.74	0.0764045		-0.04
6.78	25	169.5	0.0062422		-0.05
	4005	6.82651
