# Supplementary material for: Interaction Wave Functions and Interaction-Based Coherence and Entanglement in Complex Adaptive Systems
Source: Research Square preprint supplement (doi:10.21203/rs.3.rs-6846233/v1), 2025-06-16
Supplement: Supplementary file 168 [file 30623-27.xls]

## Sheet: Sheet1
0.12					144	144	17.28	0.00703744
0.11					56	56	6.16	0.00273678
0.1				13	19	32	3.2	0.00156387
0.09				30	102	132	11.88	0.00645098
0.08	54			79	0	133	10.64	0.00649985
0.07	151	42	160	88	58	499	34.93	0.0243867
0.06	84	47	32	326	258	747	44.82	0.0365067
0.05	63	111	60	222	122	578	28.9	0.0282475
0.04	91	88	55	87	699	1020	40.8	0.0498485
0.03	812	551	151	324	137	1975	59.25	0.0965204
0.02	151	159	565	101	310	1286	25.72	0.0628482
0.01	311	461	254	265	420	1711	17.11	0.0836184
0	721	456	303	51	136	1667	0	0.0814681
-0.01	791	590	248	185	892	2706	-27.06	0.132245
-0.02	886	699	236	233	169	2223	-44.46	0.10864
-0.03	364	512	439	255	115	1685	-50.55	0.0823478
-0.04	871	324	87	583	695	2560	-102.4	0.12511
-0.05	53	66	227	125	37	508	-25.4	0.0248265
-0.06	99		49	127	257	532	-31.92	0.0259994
-0.07			30		0	30	-2.1	0.00146613
-0.08					0	0	0	0
-0.09					176	176	-15.84	0.00860131
-0.1					16	16	-1.6	0.000781937
-0.11					46	46	-5.06	0.00224807
						20462	-0.000278565
