# Supplementary material for: Interaction Wave Functions and Interaction-Based Coherence and Entanglement in Complex Adaptive Systems
Source: Research Square preprint supplement (doi:10.21203/rs.3.rs-6846233/v1), 2025-06-16
Supplement: Supplementary file 169 [file 30623.xls]

## Sheet: Sheet1
6.8	54	367.2	0.00981461		0.08
6.79	151	1025.29	0.0274446		0.07
6.78	84	569.52	0.0152672		0.06
6.77	63	426.51	0.0114504		0.05
6.76	91	615.16	0.0165394		0.04
6.75	812	5481	0.147583		0.03
6.74	151	1017.74	0.0274446		0.02
6.73	311	2093.03	0.0565249		0.01
6.72	721	4845.12	0.131043		0
6.71	791	5307.61	0.143766		-0.01
6.7	886	5936.2	0.161032		-0.02
6.69	364	2435.16	0.0661578		-0.03
6.68	871	5818.28	0.158306		-0.04
6.67	53	353.51	0.00963286		-0.05
6.66	99	659.34	0.0179935		-0.06
	5502	6.71586
