# Supplementary material for: Interaction Wave Functions and Interaction-Based Coherence and Entanglement in Complex Adaptive Systems
Source: Research Square preprint supplement (doi:10.21203/rs.3.rs-6846233/v1), 2025-06-16
Supplement: Supplementary file 170 [file 30624.xls]

## Sheet: Sheet1
6.74	42	283.08	0.0102289		0.07
6.73	47	316.31	0.0114467		0.06
6.72	111	745.92	0.0270336		0.05
6.71	88	590.48	0.0214321		0.04
6.7	551	3691.7	0.134194		0.03
6.69	159	1063.71	0.0387238		0.02
6.68	461	3079.48	0.112275		0.01
6.67	456	3041.52	0.111057		0
6.66	590	3929.4	0.143692		-0.01
6.65	699	4648.35	0.170239		-0.02
6.64	512	3399.68	0.124696		-0.03
6.63	324	2148.12	0.0789089		-0.04
6.62	66	436.92	0.016074		-0.05
	4106	6.66699
