# Supplementary material for: Interaction Wave Functions and Interaction-Based Coherence and Entanglement in Complex Adaptive Systems
Source: Research Square preprint supplement (doi:10.21203/rs.3.rs-6846233/v1), 2025-06-16
Supplement: Supplementary file 171 [file 30625.xls]

## Sheet: Sheet1
6.8	160	1088	0.0552486		0.07
6.79	32	217.28	0.0110497		0.06
6.78	60	406.8	0.0207182		0.05
6.77	55	372.35	0.0189917		0.04
6.76	151	1020.76	0.0521409		0.03
6.75	565	3813.75	0.195097		0.02
6.74	254	1711.96	0.0877072		0.01
6.73	303	2039.19	0.104627		0
6.72	248	1666.56	0.0856354		-0.01
6.71	236	1583.56	0.0814917		-0.02
6.7	439	2941.3	0.151588		-0.03
6.69	87	582.03	0.0300414		-0.04
6.68	227	1516.36	0.078384		-0.05
6.67	49	326.83	0.0169199		-0.06
6.66	30	199.8	0.0103591		-0.07
	2896	6.72877
