# Supplementary material for: Interaction Wave Functions and Interaction-Based Coherence and Entanglement in Complex Adaptive Systems
Source: Research Square preprint supplement (doi:10.21203/rs.3.rs-6846233/v1), 2025-06-16
Supplement: Supplementary file 172 [file 30626.xls]

## Sheet: Sheet1
6.77	13	88.01	0.00420168		0.1
6.76	30	202.8	0.00969619		0.09
6.75	79	533.25	0.0255333		0.08
6.74	88	593.12	0.0284421		0.07
6.73	326	2193.98	0.105365		0.06
6.72	222	1491.84	0.0717518		0.05
6.71	87	583.77	0.0281189		0.04
6.7	324	2170.8	0.104719		0.03
6.69	101	675.69	0.0326438		0.02
6.68	265	1770.2	0.0856496		0.01
6.67	51	340.17	0.0164835		0
6.66	185	1232.1	0.0597931		-0.01
6.65	233	1549.45	0.075307		-0.02
6.64	255	1693.2	0.0824176		-0.03
6.63	583	3865.29	0.188429		-0.04
6.62	125	827.5	0.0404008		-0.05
6.61	127	839.47	0.0410472		-0.06
	3094	6.67441
