# Supplementary material for: Interaction Wave Functions and Interaction-Based Coherence and Entanglement in Complex Adaptive Systems
Source: Research Square preprint supplement (doi:10.21203/rs.3.rs-6846233/v1), 2025-06-16
Supplement: Supplementary file 173 [file 30627.xls]

## Sheet: Sheet1
6.76	144	973.44	0.0296053		0.12
6.75	56	378	0.0115132		0.11
6.74	19	128.06	0.00390625		0.1
6.73	102	686.46	0.0209704		0.09
6.72	0	0	0		0.08
6.71	58	389.18	0.0119243		0.07
6.7	258	1728.6	0.0530428		0.06
6.69	122	816.18	0.0250822		0.05
6.68	699	4669.32	0.143709		0.04
6.67	137	913.79	0.0281661		0.03
6.66	310	2064.6	0.0637336		0.02
6.65	420	2793	0.0863487		0.01
6.64	136	903.04	0.0279605		0
6.63	892	5913.96	0.183388		-0.01
6.62	169	1118.78	0.0347451		-0.02
6.61	115	760.15	0.0236431		-0.03
6.6	695	4587	0.142887		-0.04
6.59	37	243.83	0.00760691		-0.05
6.58	257	1691.06	0.0528372		-0.06
6.57	0	0	0		-0.07
6.56	0	0	0		-0.08
6.55	176	1152.8	0.0361842		-0.09
6.54	16	104.64	0.00328947		-0.1
6.53	46	300.38	0.00945724		-0.11
	4864	6.64397
