# Supplementary material for: Interaction Wave Functions and Interaction-Based Coherence and Entanglement in Complex Adaptive Systems
Source: Research Square preprint supplement (doi:10.21203/rs.3.rs-6846233/v1), 2025-06-16
Supplement: Supplementary file 174 [file 30630.xls]

## Sheet: Sheet1
6.6	68	448.8	0.0294372		0.05
6.59	124	817.16	0.0536797		0.04
6.58	559	3678.22	0.241991		0.03
6.57	81	532.17	0.0350649		0.02
6.56	186	1220.16	0.0805195		0.01
6.55	566	3707.3	0.245022		0
6.54	167	1092.18	0.0722944		-0.01
6.53	340	2220.2	0.147186		-0.02
6.52	122	795.44	0.0528139		-0.03
6.51	10	65.1	0.004329		-0.04
6.5	45	292.5	0.0194805		-0.05
6.49	12	77.88	0.00519481		-0.06
6.48	30	194.4	0.012987		-0.07
	2310	6.55477
