# Supplementary material for: Interaction Wave Functions and Interaction-Based Coherence and Entanglement in Complex Adaptive Systems
Source: Research Square preprint supplement (doi:10.21203/rs.3.rs-6846233/v1), 2025-06-16
Supplement: Supplementary file 175 [file 30602-06.xls]

## Sheet: Sheet1
0.21					192	192	40.32	0.00127682
0.2					0	0	0	0
0.19					0	0	0	0
0.18			296	305	0	601	108.18	0.00399673
0.17			1202	158	17	1377	234.09	0.00915723
0.16			22	635	105	762	121.92	0.0050674
0.15	44		277	223	37	581	87.15	0.00386373
0.14	49		1702	696	58	2505	350.7	0.0166586
0.13	115		2180	1221	121	3637	472.81	0.0241865
0.12	85		1372	1049	273	2779	333.48	0.0184807
0.11	64		305	525	535	1429	157.19	0.00950304
0.1	189		1389	632	559	2769	276.9	0.0184142
0.09	90		1699	969	371	3129	281.61	0.0208083
0.08	346		2040	1978	325	4689	375.12	0.0311825
0.07	310		751	369	845	2275	159.25	0.015129
0.06	1191		674	379	2737	4981	298.86	0.0331243
0.05	292	144	428	344	1183	2391	119.55	0.0159005
0.04	278	3398	3741	72	966	8455	338.2	0.0562268
0.03	137	4413	3444	1402	368	9764	292.92	0.0649319
0.02	1759	2923	2154	515	1258	8609	172.18	0.057251
0.01	1421	3234	1336	109	2058	8158	81.58	0.0542518
-5.89806e-17	984	1525	2537	429	176	5651	-3.33299e-13	0.0375799
-0.01	868	3370	4414	479	1167	10298	-102.98	0.068483
-0.02	1444	2472	2816	1100	3067	10899	-217.98	0.0724798
-0.03	1061	1286	2213	211	2244	7015	-210.45	0.0466507
-0.04	2490	671	1290	530	11282	16263	-650.52	0.108151
-0.05	590	610	1167	354	83	2804	-140.2	0.018647
-0.06	565	1098	6649	162	321	8795	-527.7	0.0584879
-0.07	41	568	3616	254		4479	-313.53	0.0297859
-0.08	4	705	1303	10		2022	-161.76	0.0134466
-0.09		611	1676	295		2582	-232.38	0.0171706
-0.1		295	1056	658		2009	-200.9	0.0133601
-0.11			727	401		1128	-124.08	0.00750135
-0.12			737	1873		2610	-313.2	0.0173568
-0.13			434	626		1060	-137.8	0.00704914
-0.14			217	1478		1695	-237.3	0.011272
-0.15			103	406		509	-76.35	0.00338492
-0.16			219	29		248	-39.68	0.00164923
-0.17				1191		1191	-202.47	0.0079203
-0.18				32		32	-5.76	0.000212804
						150373	0.0027064
