# Supplementary material for: Interaction Wave Functions and Interaction-Based Coherence and Entanglement in Complex Adaptive Systems
Source: Research Square preprint supplement (doi:10.21203/rs.3.rs-6846233/v1), 2025-06-16
Supplement: Supplementary file 176 [file 30602.xls]

## Sheet: Sheet1
11.29	44	496.76	0.00305195		0.15
11.28	49	552.72	0.00339877		0.14
11.27	115	1296.05	0.00797669		0.13
11.26	85	957.1	0.00589582		0.12
11.25	64	720	0.0044392		0.11
11.24	189	2124.36	0.0131095		0.1
11.23	90	1010.7	0.00624263		0.09
11.22	346	3882.12	0.0239994		0.08
11.21	310	3475.1	0.0215024		0.07
11.2	1191	13339.2	0.0826108		0.06
11.19	292	3267.48	0.0202539		0.05
11.18	278	3108.04	0.0192828		0.04
11.17	137	1530.29	0.00950267		0.03
11.16	1759	19630.4	0.122009		0.02
11.15	1421	15844.2	0.0985642		0.01
11.14	984	10961.8	0.0682528		0
11.13	868	9660.84	0.0602067		-0.01
11.12	1444	16057.3	0.10016		-0.02
11.11	1061	11787.7	0.0735937		-0.03
11.1	2490	27639	0.172713		-0.04
11.09	590	6543.1	0.0409239		-0.05
11.08	565	6260.2	0.0391898		-0.06
11.07	41	453.87	0.00284386		-0.07
11.06	4	44.24	0.00027745		-0.08
	14417	11.1426
