# Supplementary material for: Interaction Wave Functions and Interaction-Based Coherence and Entanglement in Complex Adaptive Systems
Source: Research Square preprint supplement (doi:10.21203/rs.3.rs-6846233/v1), 2025-06-16
Supplement: Supplementary file 177 [file 30603.xls]

## Sheet: Sheet1
11.26	144	1621.44	0.00527029		0.05
11.25	3398	38227.5	0.124364		0.04
11.24	4413	49602.1	0.161512		0.03
11.23	2923	32825.3	0.106979		0.02
11.22	3234	36285.5	0.118362		0.01
11.21	1525	17095.2	0.0558138		0
11.2	3370	37744	0.123339		-0.01
11.19	2472	27661.7	0.0904732		-0.02
11.18	1286	14377.5	0.0470666		-0.03
11.17	671	7495.07	0.0245581		-0.04
11.16	610	6807.6	0.0223255		-0.05
11.15	1098	12242.7	0.0401859		-0.06
11.14	568	6327.52	0.0207883		-0.07
11.13	705	7846.65	0.0258024		-0.08
11.12	611	6794.32	0.0223621		-0.09
11.11	295	3277.45	0.0107968		-0.1
	27323	11.2078
