# Supplementary material for: Interaction Wave Functions and Interaction-Based Coherence and Entanglement in Complex Adaptive Systems
Source: Research Square preprint supplement (doi:10.21203/rs.3.rs-6846233/v1), 2025-06-16
Supplement: Supplementary file 178 [file 30604.xls]

## Sheet: Sheet1
11.54	296	3415.84	0.00526822		0.18
11.53	1202	13859.1	0.0213932		0.17
11.52	22	253.44	0.000391557		0.16
11.51	277	3188.27	0.00493005		0.15
11.5	1702	19573	0.0302922		0.14
11.49	2180	25048.2	0.0387997		0.13
11.48	1372	15750.6	0.0244189		0.12
11.47	305	3498.35	0.0054284		0.11
11.46	1389	15917.9	0.0247215		0.1
11.45	1699	19453.6	0.0302388		0.09
11.44	2040	23337.6	0.036308		0.08
11.43	751	8583.93	0.0133663		0.07
11.42	674	7697.08	0.0119959		0.06
11.41	428	4883.48	0.00761756		0.05
11.4	3741	42647.4	0.0665824		0.04
11.39	3444	39227.2	0.0612964		0.03
11.38	2154	24512.5	0.038337		0.02
11.37	1336	15190.3	0.0237782		0.01
11.36	2537	28820.3	0.0451536		0
11.35	4414	50098.9	0.0785605		-0.01
11.34	2816	31933.4	0.0501192		-0.02
11.33	2213	25073.3	0.039387		-0.03
11.32	1290	14602.8	0.0229595		-0.04
11.31	1167	13198.8	0.0207703		-0.05
11.3	6649	75133.7	0.118339		-0.06
11.29	3616	40824.6	0.0643577		-0.07
11.28	1303	14697.8	0.0231908		-0.08
11.27	1676	18888.5	0.0298295		-0.09
11.26	1056	11890.6	0.0187947		-0.1
11.25	727	8178.75	0.0129392		-0.11
11.24	737	8283.88	0.0131171		-0.12
11.23	434	4873.82	0.00772434		-0.13
11.22	217	2434.74	0.00386217		-0.14
11.21	103	1154.63	0.0018332		-0.15
11.2	219	2452.8	0.00389777		-0.16
	56186	11.3654
