# Supplementary material for: Interaction Wave Functions and Interaction-Based Coherence and Entanglement in Complex Adaptive Systems
Source: Research Square preprint supplement (doi:10.21203/rs.3.rs-6846233/v1), 2025-06-16
Supplement: Supplementary file 179 [file 30605.xls]

## Sheet: Sheet1
11.4	305	3477	0.0138015		0.18
11.39	158	1799.62	0.00714964		0.17
11.38	635	7226.3	0.0287343		0.16
11.37	223	2535.51	0.010091		0.15
11.36	696	7906.56	0.0314946		0.14
11.35	1221	13858.4	0.0552514		0.13
11.34	1049	11895.7	0.0474682		0.12
11.33	525	5948.25	0.0237567		0.11
11.32	632	7154.24	0.0285986		0.1
11.31	969	10959.4	0.0438481		0.09
11.3	1978	22351.4	0.0895063		0.08
11.29	369	4166.01	0.0166976		0.07
11.28	379	4275.12	0.0171501		0.06
11.27	344	3876.88	0.0155663		0.05
11.26	72	810.72	0.00325807		0.04
11.25	1402	15772.5	0.0634418		0.03
11.24	515	5788.6	0.0233042		0.02
11.23	109	1224.07	0.00493235		0.01
11.22	429	4813.38	0.0194126		0
11.21	479	5369.59	0.0216752		-0.01
11.2	1100	12320	0.049776		-0.02
11.19	211	2361.09	0.00954794		-0.03
11.18	530	5925.4	0.023983		-0.04
11.17	354	3954.18	0.0160188		-0.05
11.16	162	1807.92	0.00733065		-0.06
11.15	254	2832.1	0.0114937		-0.07
11.14	10	111.4	0.000452509		-0.08
11.13	295	3283.35	0.013349		-0.09
11.12	658	7316.96	0.0297751		-0.1
11.11	401	4455.11	0.0181456		-0.11
11.1	1873	20790.3	0.084755		-0.12
11.09	626	6942.34	0.0283271		-0.13
11.08	1478	16376.2	0.0668809		-0.14
11.07	406	4494.42	0.0183719		-0.15
11.06	29	320.74	0.00131228		-0.16
11.05	1191	13160.6	0.0538938		-0.17
11.04	32	353.28	0.00144803		-0.18
	22099	11.2229
