# Supplementary material for: Interaction Wave Functions and Interaction-Based Coherence and Entanglement in Complex Adaptive Systems
Source: Research Square preprint supplement (doi:10.21203/rs.3.rs-6846233/v1), 2025-06-16
Supplement: Supplementary file 180 [file 30606.xls]

## Sheet: Sheet1
11.15	192	2140.8	0.00632661		0.21
11.14	0	0	0		0.2
11.13	0	0	0		0.19
11.12	0	0	0		0.18
11.11	17	188.87	0.000560169		0.17
11.1	105	1165.5	0.00345987		0.16
11.09	37	410.33	0.00121919		0.15
11.08	58	642.64	0.00191116		0.14
11.07	121	1339.47	0.00398708		0.13
11.06	273	3019.38	0.00899565		0.12
11.05	535	5911.75	0.0176288		0.11
11.04	559	6171.36	0.0184197		0.1
11.03	371	4092.13	0.0122249		0.09
11.02	325	3581.5	0.0107091		0.08
11.01	845	9303.45	0.0278437		0.07
11	2737	30107	0.0901872		0.06
10.99	1183	13001.2	0.0389812		0.05
10.98	966	10606.7	0.0318308		0.04
10.97	368	4036.96	0.012126		0.03
10.96	1258	13787.7	0.0414525		0.02
10.95	2058	22535.1	0.0678134		0.01
10.94	176	1925.44	0.00579939		0
10.93	1167	12755.3	0.0384539		-0.01
10.92	3067	33491.6	0.101061		-0.02
10.91	2244	24482	0.0739423		-0.03
10.9	11282	122974	0.371754		-0.04
10.89	83	903.87	0.00273494		-0.05
10.88	321	3492.48	0.0105773		-0.06
	30348	10.942
