# Supplementary material for: Interaction Wave Functions and Interaction-Based Coherence and Entanglement in Complex Adaptive Systems
Source: Research Square preprint supplement (doi:10.21203/rs.3.rs-6846233/v1), 2025-06-16
Supplement: Supplementary file 181 [file 30609-13.xls]

## Sheet: Sheet1
0.11	56					56	6.16	0.00075068
0.1	45			83	347	475	47.5	0.00636738
0.09	0			54	263	317	28.53	0.00424939
0.08	461		100	868	285	1714	137.12	0.0229762
0.07	431		818	81	2732	4062	284.34	0.0544511
0.06	433	75	424	188	2912	4032	241.92	0.054049
0.05	314	446	1130	0	3025	4915	245.75	0.0658856
0.04	90	377	1070	99	1262	2898	115.92	0.0388477
0.03	939	616	484	341	2827	5207	156.21	0.0697999
0.02	329	517	689	176	6622	8333	166.66	0.111704
0.01	556	512	728	439	2599	4834	48.34	0.0647998
0	929	571	1713	646	2414	6273	0	0.0840896
-0.01	1637	687	81	415	2803	5623	-56.23	0.0753763
-0.02	2475	382	943	2224	1195	7219	-144.38	0.0967707
-0.03	371	353	950	528	4639	6841	-205.23	0.0917036
-0.04	502	905	575	687	486	3155	-126.2	0.0422928
-0.05	267	272	710	134	410	1793	-89.65	0.0240352
-0.06	168	145	207	552	180	1252	-75.12	0.0167831
-0.07	7	8	157	23	343	538	-37.66	0.00721189
-0.08		0	217		625	842	-67.36	0.011287
-0.09		150	223		412	785	-70.65	0.0105229
-0.1			349		646	995	-99.5	0.013338
-0.11			64		189	253	-27.83	0.00339147
-0.12			211		268	479	-57.48	0.006421
-0.13			20		395	415	-53.95	0.00556308
-0.14			0		75	75	-10.5	0.00100538
-0.15			245		0	245	-36.75	0.00328423
-0.16					75	75	-12	0.00100538
-0.17					320	320	-54.4	0.0042896
-0.18					81	81	-14.58	0.00108581
-0.19					73	73	-13.87	0.000978565
-0.2					35	35	-7	0.000469175
-0.21					70	70	-14.7	0.00093835
-0.22					11	11	-2.42	0.000147455
-0.23					308	308	-70.84	0.00412874
						74599	0.00174466
