# Supplementary material for: Interaction Wave Functions and Interaction-Based Coherence and Entanglement in Complex Adaptive Systems
Source: Research Square preprint supplement (doi:10.21203/rs.3.rs-6846233/v1), 2025-06-16
Supplement: Supplementary file 182 [file 30609.xls]

## Sheet: Sheet1
10.98	56	614.88	0.00559441		0.11
10.97	45	493.65	0.0044955		0.1
10.96	0	0	0		0.09
10.95	461	5047.95	0.0460539		0.08
10.94	431	4715.14	0.0430569		0.07
10.93	433	4732.69	0.0432567		0.06
10.92	314	3428.88	0.0313686		0.05
10.91	90	981.9	0.00899101		0.04
10.9	939	10235.1	0.0938062		0.03
10.89	329	3582.81	0.0328671		0.02
10.88	556	6049.28	0.0555445		0.01
10.87	929	10098.2	0.0928072		0
10.86	1637	17777.8	0.163536		-0.01
10.85	2475	26853.8	0.247253		-0.02
10.84	371	4021.64	0.0370629		-0.03
10.83	502	5436.66	0.0501499		-0.04
10.82	267	2888.94	0.0266733		-0.05
10.81	168	1816.08	0.0167832		-0.06
10.8	7	75.6	0.000699301		-0.07
	10010	10.8742
