# Supplementary material for: Interaction Wave Functions and Interaction-Based Coherence and Entanglement in Complex Adaptive Systems
Source: Research Square preprint supplement (doi:10.21203/rs.3.rs-6846233/v1), 2025-06-16
Supplement: Supplementary file 183 [file 30610.xls]

## Sheet: Sheet1
11	75	825	0.0124668		0.06
10.99	446	4901.54	0.0741356		0.05
10.98	377	4139.46	0.0626662		0.04
10.97	616	6757.52	0.102394		0.03
10.96	517	5666.32	0.0859375		0.02
10.95	512	5606.4	0.0851064		0.01
10.94	571	6246.74	0.0949136		0
10.93	687	7508.91	0.114195		-0.01
10.92	382	4171.44	0.0634973		-0.02
10.91	353	3851.23	0.0586769		-0.03
10.9	905	9864.5	0.150432		-0.04
10.89	272	2962.08	0.0452128		-0.05
10.88	145	1577.6	0.0241024		-0.06
10.87	8	86.96	0.00132979		-0.07
10.86	0	0	0		-0.08
10.85	150	1627.5	0.0249335		-0.09
	6016	10.9364
