# Supplementary material for: Interaction Wave Functions and Interaction-Based Coherence and Entanglement in Complex Adaptive Systems
Source: Research Square preprint supplement (doi:10.21203/rs.3.rs-6846233/v1), 2025-06-16
Supplement: Supplementary file 184 [file 30611.xls]

## Sheet: Sheet1
11.13	100	1113	0.008259		0.08
11.12	818	9096.16	0.0675586		0.07
11.11	424	4710.64	0.0350182		0.06
11.1	1130	12543	0.0933267		0.05
11.09	1070	11866.3	0.0883713		0.04
11.08	484	5362.72	0.0399736		0.03
11.07	689	7627.23	0.0569045		0.02
11.06	728	8051.68	0.0601255		0.01
11.05	1713	18928.7	0.141477		0
11.04	81	894.24	0.00668979		-0.01
11.03	943	10401.3	0.0778824		-0.02
11.02	950	10469	0.0784605		-0.03
11.01	575	6330.75	0.0474893		-0.04
11	710	7810	0.0586389		-0.05
10.99	207	2274.93	0.0170961		-0.06
10.98	157	1723.86	0.0129666		-0.07
10.97	217	2380.49	0.017922		-0.08
10.96	223	2444.08	0.0184176		-0.09
10.95	349	3821.55	0.0288239		-0.1
10.94	64	700.16	0.00528576		-0.11
10.93	211	2306.23	0.0174265		-0.12
10.92	20	218.4	0.0016518		-0.13
10.91	0	0	0		-0.14
10.9	245	2670.5	0.0202346		-0.15
	12108	11.046
