# Supplementary material for: Interaction Wave Functions and Interaction-Based Coherence and Entanglement in Complex Adaptive Systems
Source: Research Square preprint supplement (doi:10.21203/rs.3.rs-6846233/v1), 2025-06-16
Supplement: Supplementary file 185 [file 30612.xls]

## Sheet: Sheet1
11.12	83	922.96	0.0110109		0.1
11.11	54	599.94	0.0071637		0.09
11.1	868	9634.8	0.11515		0.08
11.09	81	898.29	0.0107456		0.07
11.08	188	2083.04	0.0249403		0.06
11.07	0	0	0		0.05
11.06	99	1094.94	0.0131335		0.04
11.05	341	3768.05	0.0452375		0.03
11.04	176	1943.04	0.0233484		0.02
11.03	439	4842.17	0.0582383		0.01
11.02	646	7118.92	0.0856991		0
11.01	415	4569.15	0.0550544		-0.01
11	2224	24464	0.295038		-0.02
10.99	528	5802.72	0.0700451		-0.03
10.98	687	7543.26	0.0911382		-0.04
10.97	134	1469.98	0.0177766		-0.05
10.96	552	6049.92	0.073229		-0.06
10.95	23	251.85	0.00305121		-0.07
	7538	11.0184
