# Supplementary material for: Interaction Wave Functions and Interaction-Based Coherence and Entanglement in Complex Adaptive Systems
Source: Research Square preprint supplement (doi:10.21203/rs.3.rs-6846233/v1), 2025-06-16
Supplement: Supplementary file 186 [file 30613.xls]

## Sheet: Sheet1
11.43	347	3966.21	0.00891412		0.1
11.42	263	3003.46	0.00675624		0.09
11.41	285	3251.85	0.0073214		0.08
11.4	2732	31144.8	0.0701826		0.07
11.39	2912	33167.7	0.0748067		0.06
11.38	3025	34424.5	0.0777096		0.05
11.37	1262	14348.9	0.0324197		0.04
11.36	2827	32114.7	0.0726231		0.03
11.35	6622	75159.7	0.170113		0.02
11.34	2599	29472.7	0.066766		0.01
11.33	2414	27350.6	0.0620135		0
11.32	2803	31730	0.0720066		-0.01
11.31	1195	13515.5	0.0306985		-0.02
11.3	4639	52420.7	0.119172		-0.03
11.29	486	5486.94	0.0124849		-0.04
11.28	410	4624.8	0.0105325		-0.05
11.27	180	2028.6	0.00462404		-0.06
11.26	343	3862.18	0.00881136		-0.07
11.25	625	7031.25	0.0160557		-0.08
11.24	412	4630.88	0.0105839		-0.09
11.23	646	7254.58	0.0165952		-0.1
11.22	189	2120.58	0.00485524		-0.11
11.21	268	3004.28	0.00688468		-0.12
11.2	395	4424	0.0101472		-0.13
11.19	75	839.25	0.00192668		-0.14
11.18	0	0	0		-0.15
11.17	75	837.75	0.00192668		-0.16
11.16	320	3571.2	0.00822052		-0.17
11.15	81	903.15	0.00208082		-0.18
11.14	73	813.22	0.00187531		-0.19
11.13	35	389.55	0.000899119		-0.2
11.12	70	778.4	0.00179824		-0.21
11.11	11	122.21	0.00028258		-0.22
11.1	308	3418.8	0.00791225		-0.23
	38927	11.3344
