# Supplementary material for: Interaction Wave Functions and Interaction-Based Coherence and Entanglement in Complex Adaptive Systems
Source: Research Square preprint supplement (doi:10.21203/rs.3.rs-6846233/v1), 2025-06-16
Supplement: Supplementary file 187 [file 30616-20.xls]

## Sheet: Sheet1
0.17				47		47	7.99	0.000621184
0.16				81		81	12.96	0.00107055
0.15				20		20	3	0.000264333
0.14		1018		268		1286	180.04	0.0169966
0.13		10		13		23	2.99	0.000303984
0.12		0	295	38		333	39.96	0.00440115
0.11	102	151	0	212		465	51.15	0.00614575
0.1	529	112	780	292		1713	171.3	0.0226402
0.09	400	362	0	534	29	1325	119.25	0.0175121
0.08	1261	24	294	305	129	2013	161.04	0.0266052
0.07	35	150	195	324	5	709	49.63	0.00937062
0.06	280	4	244	325	263	1116	66.96	0.0147498
0.05	729	2	354	625	579	2289	114.45	0.030253
0.04	384	267	1321	1539	1328	4839	193.56	0.0639555
0.03	727	32	797	137	2492	4185	125.55	0.0553118
0.02	372	641	605	745	2238	4601	92.02	0.0608099
0.01	1018	119	904	323	4301	6665	66.65	0.0880891
0	5466	445	883	894	1107	8795	0	0.116241
-0.01	1752	1252	644	1390	2564	7602	-76.02	0.100473
-0.02	2342	483	436	389	264	3914	-78.28	0.0517301
-0.03	1113	1041	50	524	848	3576	-107.28	0.0472628
-0.04	1180	381	5	1100	2716	5382	-215.28	0.0711321
-0.05	1655	1107	589	1233	1100	5684	-284.2	0.0751236
-0.06	326	936	534	1090	794	3680	-220.8	0.0486374
-0.07	460	86	135	342	109	1132	-79.24	0.0149613
-0.08	30	398	179	547	6	1160	-92.8	0.0153313
-0.09		0	134	397	0	531	-47.79	0.00701805
-0.1		119	770	479	0	1368	-136.8	0.0180804
-0.11		366	382		18	766	-84.26	0.010124
-0.12			236		93	329	-39.48	0.00434829
-0.13					1	1	-0.13	1.32167e-05
-0.14					32	32	-4.48	0.000422934
						75662	-0.000110227
