# Supplementary material for: Interaction Wave Functions and Interaction-Based Coherence and Entanglement in Complex Adaptive Systems
Source: Research Square preprint supplement (doi:10.21203/rs.3.rs-6846233/v1), 2025-06-16
Supplement: Supplementary file 188 [file 30616.xls]

## Sheet: Sheet1
11.51	102	1174.02	0.00505927		0.11
11.5	529	6083.5	0.0262388		0.1
11.49	400	4596	0.0198403		0.09
11.48	1261	14476.3	0.0625465		0.08
11.47	35	401.45	0.00173602		0.07
11.46	280	3208.8	0.0138882		0.06
11.45	729	8347.05	0.0361589		0.05
11.44	384	4392.96	0.0190467		0.04
11.43	727	8309.61	0.0360597		0.03
11.42	372	4248.24	0.0184515		0.02
11.41	1018	11615.4	0.0504935		0.01
11.4	5466	62312.4	0.271118		0
11.39	1752	19955.3	0.0869005		-0.01
11.38	2342	26652	0.116165		-0.02
11.37	1113	12654.8	0.0552056		-0.03
11.36	1180	13404.8	0.0585288		-0.04
11.35	1655	18784.3	0.0820892		-0.05
11.34	326	3696.84	0.0161698		-0.06
11.33	460	5211.8	0.0228163		-0.07
11.32	30	339.6	0.00148802		-0.08
	20161	11.4015
