# Supplementary material for: Interaction Wave Functions and Interaction-Based Coherence and Entanglement in Complex Adaptive Systems
Source: Research Square preprint supplement (doi:10.21203/rs.3.rs-6846233/v1), 2025-06-16
Supplement: Supplementary file 189 [file 30617.xls]

## Sheet: Sheet1
11.45	1018	11656.1	0.10709		0.14
11.44	10	114.4	0.00105197		0.13
11.43	0	0	0		0.12
11.42	151	1724.42	0.0158847		0.11
11.41	112	1277.92	0.011782		0.1
11.4	362	4126.8	0.0380812		0.09
11.39	24	273.36	0.00252472		0.08
11.38	150	1707	0.0157795		0.07
11.37	4	45.48	0.000420787		0.06
11.36	2	22.72	0.000210393		0.05
11.35	267	3030.45	0.0280875		0.04
11.34	32	362.88	0.00336629		0.03
11.33	641	7262.53	0.0674311		0.02
11.32	119	1347.08	0.0125184		0.01
11.31	445	5032.95	0.0468125		0
11.3	1252	14147.6	0.131706		-0.01
11.29	483	5453.07	0.05081		-0.02
11.28	1041	11742.5	0.10951		-0.03
11.27	381	4293.87	0.0400799		-0.04
11.26	1107	12464.8	0.116453		-0.05
11.25	936	10530	0.0984641		-0.06
11.24	86	966.64	0.00904692		-0.07
11.23	398	4469.54	0.0418683		-0.08
11.22	0	0	0		-0.09
11.21	119	1333.99	0.0125184		-0.1
11.2	366	4099.2	0.038502		-0.11
	9506	11.3071
