# Supplementary material for: Interaction Wave Functions and Interaction-Based Coherence and Entanglement in Complex Adaptive Systems
Source: Research Square preprint supplement (doi:10.21203/rs.3.rs-6846233/v1), 2025-06-16
Supplement: Supplementary file 190 [file 30618.xls]

## Sheet: Sheet1
11.42	295	3368.9	0.0274011		0.12
11.41	0	0	0		0.11
11.4	780	8892	0.0724503		0.1
11.39	0	0	0		0.09
11.38	294	3345.72	0.0273082		0.08
11.37	195	2217.15	0.0181126		0.07
11.36	244	2771.84	0.0226639		0.06
11.35	354	4017.9	0.0328813		0.05
11.34	1321	14980.1	0.122701		0.04
11.33	797	9030.01	0.0740294		0.03
11.32	605	6848.6	0.0561954		0.02
11.31	904	10224.2	0.083968		0.01
11.3	883	9977.9	0.0820175		0
11.29	644	7270.76	0.0598179		-0.01
11.28	436	4918.08	0.0404979		-0.02
11.27	50	563.5	0.00464425		-0.03
11.26	5	56.3	0.000464425		-0.04
11.25	589	6626.25	0.0547093		-0.05
11.24	534	6002.16	0.0496006		-0.06
11.23	135	1516.05	0.0125395		-0.07
11.22	179	2008.38	0.0166264		-0.08
11.21	134	1502.14	0.0124466		-0.09
11.2	770	8624	0.0715215		-0.1
11.19	382	4274.58	0.0354821		-0.11
11.18	236	2638.48	0.0219209		-0.12
	10766	11.3018
