# Supplementary material for: Interaction Wave Functions and Interaction-Based Coherence and Entanglement in Complex Adaptive Systems
Source: Research Square preprint supplement (doi:10.21203/rs.3.rs-6846233/v1), 2025-06-16
Supplement: Supplementary file 191 [file 30619.xls]

## Sheet: Sheet1
11.23	47	527.81	0.00330683		0.17
11.22	81	908.82	0.00569901		0.16
11.21	20	224.2	0.00140716		0.15
11.2	268	3001.6	0.018856		0.14
11.19	13	145.47	0.000914656		0.13
11.18	38	424.84	0.00267361		0.12
11.17	212	2368.04	0.0149159		0.11
11.16	292	3258.72	0.0205446		0.1
11.15	534	5954.1	0.0375712		0.09
11.14	305	3397.7	0.0214592		0.08
11.13	324	3606.12	0.022796		0.07
11.12	325	3614	0.0228664		0.06
11.11	625	6943.75	0.0439738		0.05
11.1	1539	17082.9	0.108281		0.04
11.09	137	1519.33	0.00963906		0.03
11.08	745	8254.6	0.0524168		0.02
11.07	323	3575.61	0.0227257		0.01
11.06	894	9887.64	0.0629002		0
11.05	1390	15359.5	0.0977978		-0.01
11.04	389	4294.56	0.0273693		-0.02
11.03	524	5779.72	0.0368677		-0.03
11.02	1100	12122	0.0773939		-0.04
11.01	1233	13575.3	0.0867516		-0.05
11	1090	11990	0.0766904		-0.06
10.99	342	3758.58	0.0240625		-0.07
10.98	547	6006.06	0.0384859		-0.08
10.97	397	4355.09	0.0279322		-0.09
10.96	479	5249.84	0.0337015		-0.1
	14213	11.0593
