# Supplementary material for: Interaction Wave Functions and Interaction-Based Coherence and Entanglement in Complex Adaptive Systems
Source: Research Square preprint supplement (doi:10.21203/rs.3.rs-6846233/v1), 2025-06-16
Supplement: Supplementary file 192 [file 30620.xls]

## Sheet: Sheet1
11.23	29	325.67	0.0013799		0.09
11.22	129	1447.38	0.00613818		0.08
11.21	5	56.05	0.000237914		0.07
11.2	263	2945.6	0.0125143		0.06
11.19	579	6479.01	0.0275504		0.05
11.18	1328	14847	0.06319		0.04
11.17	2492	27835.6	0.118576		0.03
11.16	2238	24976.1	0.10649		0.02
11.15	4301	47956.2	0.204654		0.01
11.14	1107	12332	0.0526742		0
11.13	2564	28537.3	0.122002		-0.01
11.12	264	2935.68	0.0125619		-0.02
11.11	848	9421.28	0.0403502		-0.03
11.1	2716	30147.6	0.129235		-0.04
11.09	1100	12199	0.0523411		-0.05
11.08	794	8797.52	0.0377807		-0.06
11.07	109	1206.63	0.00518652		-0.07
11.06	6	66.36	0.000285497		-0.08
11.05	0	0	0		-0.09
11.04	0	0	0		-0.1
11.03	18	198.54	0.00085649		-0.11
11.02	93	1024.86	0.0044252		-0.12
11.01	1	11.01	4.75828e-05		-0.13
11	32	352	0.00152265		-0.14
	21016	11.1391
