# Supplementary material for: Interaction Wave Functions and Interaction-Based Coherence and Entanglement in Complex Adaptive Systems
Source: Research Square preprint supplement (doi:10.21203/rs.3.rs-6846233/v1), 2025-06-16
Supplement: Supplementary file 193 [file 30623-27.xls]

## Sheet: Sheet1
0.24					3	3	0.72	5.20571e-05
0.23					0	0	0	0
0.22					0	0	0	0
0.21			53		0	53	11.13	0.000919676
0.2			0		0	0	0	0
0.19			96	57	0	153	29.07	0.00265491
0.18			92	18	0	110	19.8	0.00190876
0.17			98	294	0	392	66.64	0.00680213
0.16			119	0	0	119	19.04	0.00206493
0.15			319	94	0	413	61.95	0.00716653
0.14			189	0	20	209	29.26	0.00362665
0.13			60	68	32	160	20.8	0.00277638
0.12			330	488	63	881	105.72	0.0152874
0.11			101	143	35	279	30.69	0.00484131
0.1			66	454	180	700	70	0.0121467
0.09		15	493	385	47	940	84.6	0.0163112
0.08		164	160	329	101	754	60.32	0.0130837
0.07	246	264	177	1199	202	2088	146.16	0.0362318
0.06	518	37	404	31	221	1211	72.66	0.0210137
0.05	2913	1837	265	522	340	5877	293.85	0.10198
0.04	999	530	567	16	245	2357	94.28	0.0408995
0.03	1224	1472	48	348	1144	4236	127.08	0.0735047
0.02	1235	782	58	460	841	3376	67.52	0.0585816
0.01	523	559	0	295	518	1895	18.95	0.0328828
-8.67362e-17	1643	738	141	423	716	3661	-3.17541e-13	0.063527
-0.01	873	958	273	377	905	3386	-33.86	0.0587551
-0.02	497	499	427	722	1113	3258	-65.16	0.056534
-0.03	825	339	702	2997	163	5026	-150.78	0.087213
-0.04	313	75	125	435	345	1293	-51.72	0.0224366
-0.05	1182	1049	30	1135	424	3820	-191	0.0662861
-0.06	399	913	1032	18	940	3302	-198.12	0.0572975
-0.07	707	314	112	43		1176	-82.32	0.0204064
-0.08	797	368	352	764		2281	-182.48	0.0395808
-0.09	162	75	399	185		821	-73.89	0.0142463
-0.1	520		117	165		802	-80.2	0.0139166
-0.11			271	47		318	-34.98	0.00551806
-0.12			301	775		1076	-129.12	0.0186712
-0.13			0	611		611	-79.43	0.0106023
-0.14			53			53	-7.42	0.000919676
-0.15			164			164	-24.6	0.00284579
-0.16			301			301	-48.16	0.00522306
-0.17			40			40	-6.8	0.000694095
-0.18			34			34	-6.12	0.000589981
						57629
