# Supplementary material for: Interaction Wave Functions and Interaction-Based Coherence and Entanglement in Complex Adaptive Systems
Source: Research Square preprint supplement (doi:10.21203/rs.3.rs-6846233/v1), 2025-06-16
Supplement: Supplementary file 194 [file 30623.xls]

## Sheet: Sheet1
11.17	246	2747.82	0.0157935		0.07
11.16	518	5780.88	0.0332563		0.06
11.15	2913	32480	0.187018		0.05
11.14	999	11128.9	0.0641371		0.04
11.13	1224	13623.1	0.0785824		0.03
11.12	1235	13733.2	0.0792886		0.02
11.11	523	5810.53	0.0335773		0.01
11.1	1643	18237.3	0.105483		0
11.09	873	9681.57	0.0560478		-0.01
11.08	497	5506.76	0.0319081		-0.02
11.07	825	9132.75	0.0529661		-0.03
11.06	313	3461.78	0.020095		-0.04
11.05	1182	13061.1	0.075886		-0.05
11.04	399	4404.96	0.0256163		-0.06
11.03	707	7798.21	0.0453903		-0.07
11.02	797	8782.94	0.0511685		-0.08
11.01	162	1783.62	0.0104006		-0.09
11	520	5720	0.0333847		-0.1
	15576	11.0988
