# Supplementary material for: Interaction Wave Functions and Interaction-Based Coherence and Entanglement in Complex Adaptive Systems
Source: Research Square preprint supplement (doi:10.21203/rs.3.rs-6846233/v1), 2025-06-16
Supplement: Supplementary file 195 [file 30624.xls]

## Sheet: Sheet1
11.24	15	168.6	0.00136513		0.09
11.23	164	1841.72	0.0149254		0.08
11.22	264	2962.08	0.0240262		0.07
11.21	37	414.77	0.00336731		0.06
11.2	1837	20574.4	0.167182		0.05
11.19	530	5930.7	0.0482344		0.04
11.18	1472	16457	0.133964		0.03
11.17	782	8734.94	0.0711685		0.02
11.16	559	6238.44	0.0508737		0.01
11.15	738	8228.7	0.0671642		0
11.14	958	10672.1	0.087186		-0.01
11.13	499	5553.87	0.0454132		-0.02
11.12	339	3769.68	0.0308518		-0.03
11.11	75	833.25	0.00682563		-0.04
11.1	1049	11643.9	0.0954678		-0.05
11.09	913	10125.2	0.0830906		-0.06
11.08	314	3479.12	0.0285766		-0.07
11.07	368	4073.76	0.0334911		-0.08
11.06	75	829.5	0.00682563		-0.09
	10988	11.1514
