# Supplementary material for: Interaction Wave Functions and Interaction-Based Coherence and Entanglement in Complex Adaptive Systems
Source: Research Square preprint supplement (doi:10.21203/rs.3.rs-6846233/v1), 2025-06-16
Supplement: Supplementary file 196 [file 30625.xls]

## Sheet: Sheet1
11.27	53	597.31	0.00618509		0.21
11.26	0	0	0		0.2
11.25	96	1080	0.0112032		0.19
11.24	92	1034.08	0.0107364		0.18
11.23	98	1100.54	0.0114366		0.17
11.22	119	1335.18	0.0138873		0.16
11.21	319	3575.99	0.0372272		0.15
11.2	189	2116.8	0.0220562		0.14
11.19	60	671.4	0.00700198		0.13
11.18	330	3689.4	0.0385109		0.12
11.17	101	1128.17	0.0117867		0.11
11.16	66	736.56	0.00770218		0.1
11.15	493	5496.95	0.057533		0.09
11.14	160	1782.4	0.018672		0.08
11.13	177	1970.01	0.0206559		0.07
11.12	404	4492.48	0.0471467		0.06
11.11	265	2944.15	0.0309254		0.05
11.1	567	6293.7	0.0661687		0.04
11.09	48	532.32	0.00560159		0.03
11.08	58	642.64	0.00676858		0.02
11.07	0	0	0		0.01
11.06	141	1559.46	0.0164547		0
11.05	273	3016.65	0.031859		-0.01
11.04	427	4714.08	0.0498308		-0.02
11.03	702	7743.06	0.0819232		-0.03
11.02	125	1377.5	0.0145875		-0.04
11.01	30	330.3	0.00350099		-0.05
11	1032	11352	0.120434		-0.06
10.99	112	1230.88	0.0130704		-0.07
10.98	352	3864.96	0.0410783		-0.08
10.97	399	4377.03	0.0465632		-0.09
10.96	117	1282.32	0.0136539		-0.1
10.95	271	2967.45	0.0316256		-0.11
10.94	301	3292.94	0.0351266		-0.12
10.93	0	0	0		-0.13
10.92	53	578.76	0.00618509		-0.14
10.91	164	1789.24	0.0191388		-0.15
10.9	301	3280.9	0.0351266		-0.16
10.89	40	435.6	0.00466799		-0.17
10.88	34	369.92	0.00396779		-0.18
	8569	11.0612
