# Supplementary material for: Interaction Wave Functions and Interaction-Based Coherence and Entanglement in Complex Adaptive Systems
Source: Research Square preprint supplement (doi:10.21203/rs.3.rs-6846233/v1), 2025-06-16
Supplement: Supplementary file 197 [file 30626.xls]

## Sheet: Sheet1
11.12	57	633.84	0.00410131		0.19
11.11	18	199.98	0.00129515		0.18
11.1	294	3263.4	0.0211541		0.17
11.09	0	0	0		0.16
11.08	94	1041.52	0.00676356		0.15
11.07	0	0	0		0.14
11.06	68	752.08	0.00489279		0.13
11.05	488	5392.4	0.035113		0.12
11.04	143	1578.72	0.0102893		0.11
11.03	454	5007.62	0.0326666		0.1
11.02	385	4242.7	0.0277018		0.09
11.01	329	3622.29	0.0236725		0.08
11	1199	13189	0.0862714		0.07
10.99	31	340.69	0.00223054		0.06
10.98	522	5731.56	0.0375594		0.05
10.97	16	175.52	0.00115124		0.04
10.96	348	3814.08	0.0250396		0.03
10.95	460	5037	0.0330983		0.02
10.94	295	3227.3	0.0212261		0.01
10.93	423	4623.39	0.030436		0
10.92	377	4116.84	0.0271262		-0.01
10.91	722	7877.02	0.0519499		-0.02
10.9	2997	32667.3	0.215643		-0.03
10.89	435	4737.15	0.0312995		-0.04
10.88	1135	12348.8	0.0816664		-0.05
10.87	18	195.66	0.00129515		-0.06
10.86	43	466.98	0.00309397		-0.07
10.85	764	8289.4	0.0549719		-0.08
10.84	185	2005.4	0.0133113		-0.09
10.83	165	1786.95	0.0118722		-0.1
10.82	47	508.54	0.00338178		-0.11
10.81	775	8377.75	0.0557634		-0.12
10.8	611	6598.8	0.0439632		-0.13
	13898	10.926
