# Supplementary material for: Interaction Wave Functions and Interaction-Based Coherence and Entanglement in Complex Adaptive Systems
Source: Research Square preprint supplement (doi:10.21203/rs.3.rs-6846233/v1), 2025-06-16
Supplement: Supplementary file 198 [file 30627.xls]

## Sheet: Sheet1
11.11	3	33.33	0.000348918		0.24
11.1	0	0	0		0.23
11.09	0	0	0		0.22
11.08	0	0	0		0.21
11.07	0	0	0		0.2
11.06	0	0	0		0.19
11.05	0	0	0		0.18
11.04	0	0	0		0.17
11.03	0	0	0		0.16
11.02	0	0	0		0.15
11.01	20	220.2	0.00232612		0.14
11	32	352	0.0037218		0.13
10.99	63	692.37	0.00732729		0.12
10.98	35	384.3	0.00407071		0.11
10.97	180	1974.6	0.0209351		0.1
10.96	47	515.12	0.00546639		0.09
10.95	101	1105.95	0.0117469		0.08
10.94	202	2209.88	0.0234938		0.07
10.93	221	2415.53	0.0257037		0.06
10.92	340	3712.8	0.0395441		0.05
10.91	245	2672.95	0.028495		0.04
10.9	1144	12469.6	0.133054		0.03
10.89	841	9158.49	0.0978134		0.02
10.88	518	5635.84	0.0602466		0.01
10.87	716	7782.92	0.0832752		0
10.86	905	9828.3	0.105257		-0.01
10.85	1113	12076.1	0.129449		-0.02
10.84	163	1766.92	0.0189579		-0.03
10.83	345	3736.35	0.0401256		-0.04
10.82	424	4587.68	0.0493138		-0.05
10.81	940	10161.4	0.109328		-0.06
	8598	10.8738
