# Supplementary material for: Interaction Wave Functions and Interaction-Based Coherence and Entanglement in Complex Adaptive Systems
Source: Research Square preprint supplement (doi:10.21203/rs.3.rs-6846233/v1), 2025-06-16
Supplement: Supplementary file 199 [file 30630.xls]

## Sheet: Sheet1
10.88	78	848.64	0.00633786		0.2
10.87	30	326.1	0.00243764		0.19
10.86	9	97.74	0.000731291		0.18
10.85	23	249.55	0.00186886		0.17
10.84	0	0	0		0.16
10.83	0	0	0		0.15
10.82	0	0	0		0.14
10.81	148	1599.88	0.0120257		0.13
10.8	775	8370	0.0629723		0.12
10.79	37	399.23	0.00300642		0.11
10.78	187	2015.86	0.0151946		0.1
10.77	143	1540.11	0.0116194		0.09
10.76	201	2162.76	0.0163322		0.08
10.75	560	6020	0.0455026		0.07
10.74	10	107.4	0.000812546		0.06
10.73	43	461.39	0.00349395		0.05
10.72	290	3108.8	0.0235638		0.04
10.71	508	5440.68	0.0412773		0.03
10.7	1752	18746.4	0.142358		0.02
10.69	501	5355.69	0.0407085		0.01
10.68	418	4464.24	0.0339644		0
10.67	225	2400.75	0.0182823		-0.01
10.66	1120	11939.2	0.0910051		-0.02
10.65	861	9169.65	0.0699602		-0.03
10.64	990	10533.6	0.080442		-0.04
10.63	444	4719.72	0.036077		-0.05
10.62	184	1954.08	0.0149508		-0.06
10.61	996	10567.6	0.0809296		-0.07
10.6	1774	18804.4	0.144146		-0.08
	12307	10.6771
