# Supplementary material for: Interaction Wave Functions and Interaction-Based Coherence and Entanglement in Complex Adaptive Systems
Source: Research Square preprint supplement (doi:10.21203/rs.3.rs-6846233/v1), 2025-06-16
Supplement: Supplementary file 200 [file 30602-06.xls]

## Sheet: Sheet1
0.17				18		18	3.06	0.000160284
0.16				48		48	7.68	0.000427423
0.15	29			15		44	6.6	0.000391804
0.14	6			352		358	50.12	0.00318786
0.13	103			2068		2171	282.23	0.019332
0.12	100			425		525	63	0.00467494
0.11	230	83	353	675		1341	147.51	0.0119411
0.1	0	394	427	386		1207	120.7	0.0107479
0.09	0	3161	286	628		4075	366.75	0.0362864
0.08	428	1180	267	547		2422	193.76	0.021567
0.07	0	1742	513	287		2542	177.94	0.0226356
0.06	499	1752	825	298	3	3377	202.62	0.030071
0.05	815	1514	859	415	622	4225	211.25	0.0376221
0.04	610	509	614	551	3448	5732	229.28	0.0510414
0.03	1489	0	678	3984	2951	9102	273.06	0.08105
0.02	1394	1531	1059	1227	846	6057	121.14	0.0539354
0.01	948	251	910	827	1717	4653	46.53	0.0414333
0	671	600	813	10	1651	3745	0	0.0333479
-0.01	973	27	775	3007	4655	9437	-94.37	0.0840331
-0.02	5823	391	2281	4499	516	13510	-270.2	0.120302
-0.03	804	689	2824	68	558	4943	-148.29	0.0440156
-0.04	1713	54	2229	135	674	4805	-192.2	0.0427868
-0.05	1001	388	1730	1148	673	4940	-247	0.0439889
-0.06	658	157	973	2185	1068	5041	-302.46	0.0448883
-0.07		18	376	6144	373	6911	-483.77	0.06154
-0.08		3108	118	711	877	4814	-385.12	0.0428669
-0.09		794		170	0	964	-86.76	0.00858407
-0.1		1252			1	1253	-125.3	0.0111575
-0.11		168			800	968	-106.48	0.00861969
-0.12		1612				1612	-193.44	0.0143543
-0.13		1461				1461	-189.93	0.0130097
						112301	-0.0028681
