# Supplementary material for: Interaction Wave Functions and Interaction-Based Coherence and Entanglement in Complex Adaptive Systems
Source: Research Square preprint supplement (doi:10.21203/rs.3.rs-6846233/v1), 2025-06-16
Supplement: Supplementary file 201 [file 30602.xls]

## Sheet: Sheet1
10.77	29	312.33	0.00158522		0.15
10.76	6	64.56	0.000327976		0.14
10.75	103	1107.25	0.00563026		0.13
10.74	100	1074	0.00546627		0.12
10.73	230	2467.9	0.0125724		0.11
10.72	0	0	0		0.1
10.71	0	0	0		0.09
10.7	428	4579.6	0.0233956		0.08
10.69	0	0	0		0.07
10.68	499	5329.32	0.0272767		0.06
10.67	815	8696.05	0.0445501		0.05
10.66	610	6502.6	0.0333443		0.04
10.65	1489	15857.9	0.0813928		0.03
10.64	1394	14832.2	0.0761998		0.02
10.63	948	10077.2	0.0518203		0.01
10.62	671	7126.02	0.0366787		0
10.61	973	10323.5	0.0531868		-0.01
10.6	5823	61723.8	0.318301		-0.02
10.59	804	8514.36	0.0439488		-0.03
10.58	1713	18123.5	0.0936373		-0.04
10.57	1001	10580.6	0.0547174		-0.05
10.56	658	6948.48	0.0359681		-0.06
	18294	10.6178
