# Supplementary material for: Interaction Wave Functions and Interaction-Based Coherence and Entanglement in Complex Adaptive Systems
Source: Research Square preprint supplement (doi:10.21203/rs.3.rs-6846233/v1), 2025-06-16
Supplement: Supplementary file 202 [file 30603.xls]

## Sheet: Sheet1
10.69	83	887.27	0.00363461		0.11
10.68	394	4207.92	0.0172535		0.1
10.67	3161	33727.9	0.138422		0.09
10.66	1180	12578.8	0.0516728		0.08
10.65	1742	18552.3	0.0762831		0.07
10.64	1752	18641.3	0.076721		0.06
10.63	1514	16093.8	0.0662988		0.05
10.62	509	5405.58	0.0222894		0.04
10.61	0	0	0		0.03
10.6	1531	16228.6	0.0670433		0.02
10.59	251	2658.09	0.0109914		0.01
10.58	600	6348	0.0262743		0
10.57	27	285.39	0.00118234		-0.01
10.56	391	4128.96	0.0171221		-0.02
10.55	689	7268.95	0.0301717		-0.03
10.54	54	569.16	0.00236469		-0.04
10.53	388	4085.64	0.0169907		-0.05
10.52	157	1651.64	0.00687511		-0.06
10.51	18	189.18	0.000788229		-0.07
10.5	3108	32634	0.136101		-0.08
10.49	794	8329.06	0.0347697		-0.09
10.48	1252	13121	0.0548257		-0.1
10.47	168	1758.96	0.00735681		-0.11
10.46	1612	16861.5	0.0705903		-0.12
10.45	1461	15267.5	0.0639779		-0.13
	22836	10.5745
