# Supplementary material for: Interaction Wave Functions and Interaction-Based Coherence and Entanglement in Complex Adaptive Systems
Source: Research Square preprint supplement (doi:10.21203/rs.3.rs-6846233/v1), 2025-06-16
Supplement: Supplementary file 203 [file 30604.xls]

## Sheet: Sheet1
10.49	353	3702.97	0.0186674		0.11
10.48	427	4474.96	0.0225806		0.1
10.47	286	2994.42	0.0151243		0.09
10.46	267	2792.82	0.0141195		0.08
10.45	513	5360.85	0.0271285		0.07
10.44	825	8613	0.0436277		0.06
10.43	859	8959.37	0.0454257		0.05
10.42	614	6397.88	0.0324696		0.04
10.41	678	7057.98	0.035854		0.03
10.4	1059	11013.6	0.0560021		0.02
10.39	910	9454.9	0.0481227		0.01
10.38	813	8438.94	0.0429931		0
10.37	775	8036.75	0.0409836		-0.01
10.36	2281	23631.2	0.120624		-0.02
10.35	2824	29228.4	0.149339		-0.03
10.34	2229	23047.9	0.117874		-0.04
10.33	1730	17870.9	0.091486		-0.05
10.32	973	10041.4	0.0514543		-0.06
10.31	376	3876.56	0.0198837		-0.07
10.3	118	1215.4	0.00624008		-0.08
	18910	10.376
