# Supplementary material for: Interaction Wave Functions and Interaction-Based Coherence and Entanglement in Complex Adaptive Systems
Source: Research Square preprint supplement (doi:10.21203/rs.3.rs-6846233/v1), 2025-06-16
Supplement: Supplementary file 204 [file 30605.xls]

## Sheet: Sheet1
10.54	18	189.72	0.000583885		0.17
10.53	48	505.44	0.00155703		0.16
10.52	15	157.8	0.000486571		0.15
10.51	352	3699.52	0.0114182		0.14
10.5	2068	21714	0.0670819		0.13
10.49	425	4458.25	0.0137862		0.12
10.48	675	7074	0.0218957		0.11
10.47	386	4041.42	0.0125211		0.1
10.46	628	6568.88	0.0203711		0.09
10.45	547	5716.15	0.0177436		0.08
10.44	287	2996.28	0.00930972		0.07
10.43	298	3108.14	0.00966654		0.06
10.42	415	4324.3	0.0134618		0.05
10.41	551	5735.91	0.0178734		0.04
10.4	3984	41433.6	0.129233		0.03
10.39	1227	12748.5	0.0398015		0.02
10.38	827	8584.26	0.0268263		0.01
10.37	10	103.7	0.00032438		0
10.36	3007	31152.5	0.0975412		-0.01
10.35	4499	46564.7	0.145939		-0.02
10.34	68	703.12	0.00220579		-0.03
10.33	135	1394.55	0.00437914		-0.04
10.32	1148	11847.4	0.0372389		-0.05
10.31	2185	22527.4	0.0708771		-0.06
10.3	6144	63283.2	0.199299		-0.07
10.29	711	7316.19	0.0230634		-0.08
10.28	170	1747.6	0.00551447		-0.09
	30828	10.3703
