# Supplementary material for: Interaction Wave Functions and Interaction-Based Coherence and Entanglement in Complex Adaptive Systems
Source: Research Square preprint supplement (doi:10.21203/rs.3.rs-6846233/v1), 2025-06-16
Supplement: Supplementary file 205 [file 30606.xls]

## Sheet: Sheet1
10.42	3	31.26	0.000139971		0.06
10.41	622	6475.02	0.0290207		0.05
10.4	3448	35859.2	0.160873		0.04
10.39	2951	30660.9	0.137685		0.03
10.38	846	8781.48	0.0394718		0.02
10.37	1717	17805.3	0.0801101		0.01
10.36	1651	17104.4	0.0770307		0
10.35	4655	48179.3	0.217188		-0.01
10.34	516	5335.44	0.024075		-0.02
10.33	558	5764.14	0.0260346		-0.03
10.32	674	6955.68	0.0314468		-0.04
10.31	673	6938.63	0.0314002		-0.05
10.3	1068	11000.4	0.0498297		-0.06
10.29	373	3838.17	0.0174031		-0.07
10.28	877	9015.56	0.0409182		-0.08
10.27	0	0	0		-0.09
10.26	1	10.26	4.6657e-05		-0.1
10.25	800	8200	0.0373256		-0.11
	21433	10.3558
