# Supplementary material for: Interaction Wave Functions and Interaction-Based Coherence and Entanglement in Complex Adaptive Systems
Source: Research Square preprint supplement (doi:10.21203/rs.3.rs-6846233/v1), 2025-06-16
Supplement: Supplementary file 206 [file 30609-13.xls]

## Sheet: Sheet1
0.16	48					48	7.68	0.000523127
0.15	163					163	24.45	0.00177645
0.14	298					298	41.72	0.00324774
0.13	23					23	2.99	0.000250665
0.12	78					78	9.36	0.000850081
0.11	354		327		1233	1914	210.54	0.0208597
0.1	307		68	30	818	1223	122.3	0.0133288
0.09	280		88	0	664	1032	92.88	0.0112472
0.08	70		1952	167	533	2722	217.76	0.0296656
0.07	20		675	2113	2402	5210	364.7	0.056781
0.06	368	209	943	127	1968	3615	216.9	0.039398
0.05	197	296	1235	1197	922	3847	192.35	0.0419264
0.04	589	419	356	258	1278	2900	116	0.0316056
0.03	280	424	3057	938	1483	6182	185.46	0.0673743
0.02	628	1898	51	3845	2294	8716	174.32	0.0949911
0.01	2702	1189	448	1778	5699	11816	118.16	0.128776
0	1964	456	433	1655	519	5027	0	0.0547866
-0.01	787	1202	14	137	1254	3394	-33.94	0.0369894
-0.02	1102	1060	1433	827	56	4478	-89.56	0.0488033
-0.03	538	1036	32	1060	696	3362	-100.86	0.0366407
-0.04	375	471	963	54	3133	4996	-199.84	0.0544488
-0.05	725	20	915	508	0	2168	-108.4	0.0236279
-0.06	160		455	388	334	1337	-80.22	0.0145713
-0.07	81		1945	888	106	3020	-211.4	0.0329134
-0.08	432		57	2955	2654	6098	-487.84	0.0664589
-0.09	1475		470	163	4344	6452	-580.68	0.0703169
-0.1			34	33	310	377	-37.7	0.00410872
-0.11			71		0	71	-7.81	0.000773791
-0.12			446		0	446	-53.52	0.00486072
-0.13			285		56	341	-44.33	0.00371638
-0.14			85		38	123	-17.22	0.00134051
-0.15			41		44	85	-12.75	0.00092637
-0.16			6		0	6	-0.96	6.53908e-05
-0.17			11		0	11	-1.87	0.000119883
-0.18			0		26	26	-4.68	0.00028336
-0.19			18		133	151	-28.69	0.00164567
						91756	-5.12228e-05
