# Supplementary material for: Interaction Wave Functions and Interaction-Based Coherence and Entanglement in Complex Adaptive Systems
Source: Research Square preprint supplement (doi:10.21203/rs.3.rs-6846233/v1), 2025-06-16
Supplement: Supplementary file 207 [file 30609.xls]

## Sheet: Sheet1
10.45	48	501.6	0.00341783		0.16
10.44	163	1701.72	0.0116064		0.15
10.43	298	3108.14	0.021219		0.14
10.42	23	239.66	0.00163771		0.13
10.41	78	811.98	0.00555397		0.12
10.4	354	3681.6	0.0252065		0.11
10.39	307	3189.73	0.0218599		0.1
10.38	280	2906.4	0.0199373		0.09
10.37	70	725.9	0.00498433		0.08
10.36	20	207.2	0.0014241		0.07
10.35	368	3808.8	0.0262034		0.06
10.34	197	2036.98	0.0140273		0.05
10.33	589	6084.37	0.0419396		0.04
10.32	280	2889.6	0.0199373		0.03
10.31	628	6474.68	0.0447166		0.02
10.3	2702	27830.6	0.192395		0.01
10.29	1964	20209.6	0.139846		0
10.28	787	8090.36	0.0560382		-0.01
10.27	1102	11317.5	0.0784677		-0.02
10.26	538	5519.88	0.0383082		-0.03
10.25	375	3843.75	0.0267018		-0.04
10.24	725	7424	0.0516235		-0.05
10.23	160	1636.8	0.0113928		-0.06
10.22	81	827.82	0.00576759		-0.07
10.21	432	4410.72	0.0307605		-0.08
10.2	1475	15045	0.105027		-0.09
	14044	10.2908
