# Supplementary material for: Interaction Wave Functions and Interaction-Based Coherence and Entanglement in Complex Adaptive Systems
Source: Research Square preprint supplement (doi:10.21203/rs.3.rs-6846233/v1), 2025-06-16
Supplement: Supplementary file 208 [file 30610.xls]

## Sheet: Sheet1
10.3	209	2152.7	0.0240783		0.06
10.29	296	3045.84	0.0341014		0.05
10.28	419	4307.32	0.0482719		0.04
10.27	424	4354.48	0.0488479		0.03
10.26	1898	19473.5	0.218664		0.02
10.25	1189	12187.3	0.136982		0.01
10.24	456	4669.44	0.0525346		0
10.23	1202	12296.5	0.138479		-0.01
10.22	1060	10833.2	0.12212		-0.02
10.21	1036	10577.6	0.119355		-0.03
10.2	471	4804.2	0.0542627		-0.04
10.19	20	203.8	0.00230415		-0.05
	8680	10.2426
