# Supplementary material for: Interaction Wave Functions and Interaction-Based Coherence and Entanglement in Complex Adaptive Systems
Source: Research Square preprint supplement (doi:10.21203/rs.3.rs-6846233/v1), 2025-06-16
Supplement: Supplementary file 209 [file 30611.xls]

## Sheet: Sheet1
10.58	327	3459.66	0.0193331		0.11
10.57	68	718.76	0.00402034		0.1
10.56	88	929.28	0.00520279		0.09
10.55	1952	20593.6	0.115407		0.08
10.54	675	7114.5	0.0399078		0.07
10.53	943	9929.79	0.0557526		0.06
10.52	1235	12992.2	0.0730164		0.05
10.51	356	3741.56	0.0210477		0.04
10.5	3057	32098.5	0.180738		0.03
10.49	51	534.99	0.00301525		0.02
10.48	448	4695.04	0.0264869		0.01
10.47	433	4533.51	0.0256001		0
10.46	14	146.44	0.000827717		-0.01
10.45	1433	14974.9	0.0847227		-0.02
10.44	32	334.08	0.00189192		-0.03
10.43	963	10044.1	0.0569351		-0.04
10.42	915	9534.3	0.0540972		-0.05
10.41	455	4736.55	0.0269008		-0.06
10.4	1945	20228	0.114993		-0.07
10.39	57	592.23	0.00336999		-0.08
10.38	470	4878.6	0.0277876		-0.09
10.37	34	352.58	0.00201017		-0.1
10.36	71	735.56	0.00419771		-0.11
10.35	446	4616.1	0.0263687		-0.12
10.34	285	2946.9	0.0168499		-0.13
10.33	85	878.05	0.00502542		-0.14
10.32	41	423.12	0.00242403		-0.15
10.31	6	61.86	0.000354736		-0.16
10.3	11	113.3	0.000650349		-0.17
10.29	0	0	0		-0.18
10.28	18	185.04	0.00106421		-0.19
	16914	10.472
