# Supplementary material for: Interaction Wave Functions and Interaction-Based Coherence and Entanglement in Complex Adaptive Systems
Source: Research Square preprint supplement (doi:10.21203/rs.3.rs-6846233/v1), 2025-06-16
Supplement: Supplementary file 210 [file 30612.xls]

## Sheet: Sheet1
10.58	30	317.4	0.00156896		0.1
10.57	0	0	0		0.09
10.56	167	1763.52	0.00873385		0.08
10.55	2113	22292.2	0.110507		0.07
10.54	127	1338.58	0.00664191		0.06
10.53	1197	12604.4	0.0626013		0.05
10.52	258	2714.16	0.013493		0.04
10.51	938	9858.38	0.049056		0.03
10.5	3845	40372.5	0.201088		0.02
10.49	1778	18651.2	0.0929868		0.01
10.48	1655	17344.4	0.0865541		0
10.47	137	1434.39	0.0071649		-0.01
10.46	827	8650.42	0.0432509		-0.02
10.45	1060	11077	0.0554364		-0.03
10.44	54	563.76	0.00282412		-0.04
10.43	508	5298.44	0.0265676		-0.05
10.42	388	4042.96	0.0202918		-0.06
10.41	888	9244.08	0.0464411		-0.07
10.4	2955	30732	0.154542		-0.08
10.39	163	1693.57	0.00852466		-0.09
10.38	33	342.54	0.00172585		-0.1
	19121	10.4773
