# Supplementary material for: Interaction Wave Functions and Interaction-Based Coherence and Entanglement in Complex Adaptive Systems
Source: Research Square preprint supplement (doi:10.21203/rs.3.rs-6846233/v1), 2025-06-16
Supplement: Supplementary file 211 [file 30613.xls]

## Sheet: Sheet1
10.7	1233	13193.1	0.037367		0.11
10.69	818	8744.42	0.0247901		0.1
10.68	664	7091.52	0.020123		0.09
10.67	533	5687.11	0.016153		0.08
10.66	2402	25605.3	0.0727945		0.07
10.65	1968	20959.2	0.0596418		0.06
10.64	922	9810.08	0.0279419		0.05
10.63	1278	13585.1	0.0387308		0.04
10.62	1483	15749.5	0.0449435		0.03
10.61	2294	24339.3	0.0695215		0.02
10.6	5699	60409.4	0.172713		0.01
10.59	519	5496.21	0.0157287		0
10.58	1254	13267.3	0.0380035		-0.01
10.57	56	591.92	0.00169712		-0.02
10.56	696	7349.76	0.0210928		-0.03
10.55	3133	33053.2	0.094948		-0.04
10.54	0	0	0		-0.05
10.53	334	3517.02	0.0101221		-0.06
10.52	106	1115.12	0.00321241		-0.07
10.51	2654	27893.5	0.0804316		-0.08
10.5	4344	45612	0.131648		-0.09
10.49	310	3251.9	0.00939479		-0.1
10.48	0	0	0		-0.11
10.47	0	0	0		-0.12
10.46	56	585.76	0.00169712		-0.13
10.45	38	397.1	0.00115162		-0.14
10.44	44	459.36	0.00133345		-0.15
10.43	0	0	0		-0.16
10.42	0	0	0		-0.17
10.41	26	270.66	0.00078795		-0.18
10.4	133	1383.2	0.00403067		-0.19
	32997	10.5894
