# Supplementary material for: Interaction Wave Functions and Interaction-Based Coherence and Entanglement in Complex Adaptive Systems
Source: Research Square preprint supplement (doi:10.21203/rs.3.rs-6846233/v1), 2025-06-16
Supplement: Supplementary file 212 [file 30616-20.xls]

## Sheet: Sheet1
0.11	70					70	7.7	0.000727122
0.1	0				5	5	0.5	5.19373e-05
0.09	151			150	1069	1370	123.3	0.0142308
0.08	10	36		0	0	46	3.68	0.000477823
0.07	0	1213	124	1397	9	2743	192.01	0.0284928
0.06	432	645	210	3869	91	5247	314.82	0.054503
0.05	440	996	2290	2621	2111	8458	422.9	0.0878571
0.04	754	182	387	410	74	1807	72.28	0.0187701
0.03	3138	305	719	465	311	4938	148.14	0.0512932
0.02	385	797	1314	853	2230	5579	111.58	0.0579516
0.01	3443	141	103	9516	1295	14498	144.98	0.150597
0	205	2429	26	2250	850	5760	0	0.0598317
-0.01	1133	1140	0	4365	1649	8287	-82.87	0.0860808
-0.02	1384	2116	192	1179	1531	6402	-128.04	0.0665005
-0.03	195	2646	1823	5688	3675	14027	-420.81	0.145705
-0.04	1365	514	651	1323	1457	5310	-212.4	0.0551574
-0.05	1689	414	580	250	2671	5604	-280.2	0.0582113
-0.06		67	7	119	181	374	-22.44	0.00388491
-0.07			182	1018		1200	-84	0.0124649
-0.08			1010	1431		2441	-195.28	0.0253558
-0.09				2104		2104	-189.36	0.0218552
						96270	-0.000763582
