# Supplementary material for: Interaction Wave Functions and Interaction-Based Coherence and Entanglement in Complex Adaptive Systems
Source: Research Square preprint supplement (doi:10.21203/rs.3.rs-6846233/v1), 2025-06-16
Supplement: Supplementary file 213 [file 30616.xls]

## Sheet: Sheet1
10.68	70	747.6	0.00473165		0.11
10.67	0	0	0		0.1
10.66	151	1609.66	0.0102068		0.09
10.65	10	106.5	0.00067595		0.08
10.64	0	0	0		0.07
10.63	432	4592.16	0.029201		0.06
10.62	440	4672.8	0.0297418		0.05
10.61	754	7999.94	0.0509666		0.04
10.6	3138	33262.8	0.212113		0.03
10.59	385	4077.15	0.0260241		0.02
10.58	3443	36426.9	0.232729		0.01
10.57	205	2166.85	0.013857		0
10.56	1133	11964.5	0.0765851		-0.01
10.55	1384	14601.2	0.0935514		-0.02
10.54	195	2055.3	0.013181		-0.03
10.53	1365	14373.5	0.0922671		-0.04
10.52	1689	17768.3	0.114168		-0.05
	14794	10.5736
