# Supplementary material for: Interaction Wave Functions and Interaction-Based Coherence and Entanglement in Complex Adaptive Systems
Source: Research Square preprint supplement (doi:10.21203/rs.3.rs-6846233/v1), 2025-06-16
Supplement: Supplementary file 214 [file 30617.xls]

## Sheet: Sheet1
10.61	36	381.96	0.0026391		0.08
10.6	1213	12857.8	0.0889231		0.07
10.59	645	6830.55	0.0472839		0.06
10.58	996	10537.7	0.0730152		0.05
10.57	182	1923.74	0.0133421		0.04
10.56	305	3220.8	0.0223591		0.03
10.55	797	8408.35	0.0584268		0.02
10.54	141	1486.14	0.0103365		0.01
10.53	2429	25577.4	0.178066		0
10.52	1140	11992.8	0.0835716		-0.01
10.51	2116	22239.2	0.155121		-0.02
10.5	2646	27783	0.193974		-0.03
10.49	514	5391.86	0.0376805		-0.04
10.48	414	4338.72	0.0303497		-0.05
10.47	67	701.49	0.00491166		-0.06
	13641	10.5323
