# Supplementary material for: Interaction Wave Functions and Interaction-Based Coherence and Entanglement in Complex Adaptive Systems
Source: Research Square preprint supplement (doi:10.21203/rs.3.rs-6846233/v1), 2025-06-16
Supplement: Supplementary file 215 [file 30618.xls]

## Sheet: Sheet1
10.6	124	1314.4	0.0128925		0.07
10.59	210	2223.9	0.0218341		0.06
10.58	2290	24228.2	0.238095		0.05
10.57	387	4090.59	0.0402371		0.04
10.56	719	7592.64	0.0747557		0.03
10.55	1314	13862.7	0.136619		0.02
10.54	103	1085.62	0.0107091		0.01
10.53	26	273.78	0.00270326		0
10.52	0	0	0		-0.01
10.51	192	2017.92	0.0199626		-0.02
10.5	1823	19141.5	0.18954		-0.03
10.49	651	6828.99	0.0676856		-0.04
10.48	580	6078.4	0.0603036		-0.05
10.47	7	73.29	0.000727802		-0.06
10.46	182	1903.72	0.0189229		-0.07
10.45	1010	10554.5	0.105011		-0.08
	9618	10.5292
