# Supplementary material for: Interaction Wave Functions and Interaction-Based Coherence and Entanglement in Complex Adaptive Systems
Source: Research Square preprint supplement (doi:10.21203/rs.3.rs-6846233/v1), 2025-06-16
Supplement: Supplementary file 216 [file 30619.xls]

## Sheet: Sheet1
10.58	150	1587	0.00384537		0.09
10.57	0	0	0		0.08
10.56	1397	14752.3	0.0358132		0.07
10.55	3869	40818	0.0991848		0.06
10.54	2621	27625.3	0.0671913		0.05
10.53	410	4317.3	0.0105107		0.04
10.52	465	4891.8	0.0119206		0.03
10.51	853	8965.03	0.0218673		0.02
10.5	9516	99918	0.24395		0.01
10.49	2250	23602.5	0.0576805		0
10.48	4365	45745.2	0.1119		-0.01
10.47	1179	12344.1	0.0302246		-0.02
10.46	5688	59496.5	0.145816		-0.03
10.45	1323	13825.4	0.0339161		-0.04
10.44	250	2610	0.00640894		-0.05
10.43	119	1241.17	0.00305066		-0.06
10.42	1018	10607.6	0.0260972		-0.07
10.41	1431	14896.7	0.0366848		-0.08
10.4	2104	21881.6	0.0539377		-0.09
	39008	10.4882
