# Supplementary material for: Interaction Wave Functions and Interaction-Based Coherence and Entanglement in Complex Adaptive Systems
Source: Research Square preprint supplement (doi:10.21203/rs.3.rs-6846233/v1), 2025-06-16
Supplement: Supplementary file 217 [file 30620.xls]

## Sheet: Sheet1
10.53	5	52.65	0.000260295		0.1
10.52	1069	11245.9	0.055651		0.09
10.51	0	0	0		0.08
10.5	9	94.5	0.00046853		0.07
10.49	91	954.59	0.00473736		0.06
10.48	2111	22123.3	0.109896		0.05
10.47	74	774.78	0.00385236		0.04
10.46	311	3253.06	0.0161903		0.03
10.45	2230	23303.5	0.116091		0.02
10.44	1295	13519.8	0.0674163		0.01
10.43	850	8865.5	0.0442501		0
10.42	1649	17182.6	0.0858452		-0.01
10.41	1531	15937.7	0.0797022		-0.02
10.4	3675	38220	0.191317		-0.03
10.39	1457	15138.2	0.0758499		-0.04
10.38	2671	27725	0.139049		-0.05
10.37	181	1876.97	0.00942267		-0.06
	19209	10.4257
