# Supplementary material for: Interaction Wave Functions and Interaction-Based Coherence and Entanglement in Complex Adaptive Systems
Source: Research Square preprint supplement (doi:10.21203/rs.3.rs-6846233/v1), 2025-06-16
Supplement: Supplementary file 218 [file 30623-27.xls]

## Sheet: Sheet1
0.16				5033		5033		0.0354866
0.15				0		0		0
0.14				151		151		0.00106467
0.13				134		134		0.000944806
0.12				94		94		0.000662775
0.11				3903		3903		0.0275192
0.1				0		0		0
0.09		378		137	629	1144		0.00806611
0.08	7	2746	20	329	245	3347		0.023599
0.07	43	0	1860	910	1684	4497		0.0317074
0.06	1363	252	1289	6861	2284	12049		0.084955
0.05	0	897	2549	277	809	4532		0.0319542
0.04	433	831	2363	1602	549	5778		0.0407395
0.03	1069	827	1893	346	736	4871		0.0343444
0.02	1740	1491	345	590	12178	16344		0.115238
0.01	4542	858	401	485	1704	7990		0.0563358
0	1062	3231	715	1016	2527	8551		0.0602913
-0.01	5550	2790	1829	0	2865	13034		0.0919
-0.02	423	6706	645	581	301	8656		0.0610317
-0.03	1690	1343	55	119	4185	7392		0.0521195
-0.04	1038	1735	1365	3243	697	8078		0.0569563
-0.05		368	2590	13	719	3690		0.0260174
-0.06		399	47	920	577	1943		0.0136997
-0.07		150	2764	652	454	4020		0.0283442
-0.08		160	575	2261	803	3799		0.026786
-0.09		143		1157	68	1368		0.00964549
-0.1		11		1326	1114	2451		0.0172815
-0.11		5		1252	470	1727		0.0121767
-0.12				883	193	1076		0.00758665
-0.13				1539	551	2090		0.0147362
-0.14				1693	30	1723		0.0121485
-0.15				868		868		0.00612009
-0.16				617		617		0.00435034
-0.17				76		76		0.00053586
-0.18				802		802		0.00565474
						141828
