# Supplementary material for: Interaction Wave Functions and Interaction-Based Coherence and Entanglement in Complex Adaptive Systems
Source: Research Square preprint supplement (doi:10.21203/rs.3.rs-6846233/v1), 2025-06-16
Supplement: Supplementary file 219 [file 30623.xls]

## Sheet: Sheet1
10.47	7	73.29	0.000369198		0.08
10.46	43	449.78	0.00226793		0.07
10.45	1363	14243.4	0.0718882		0.06
10.44	0	0	0		0.05
10.43	433	4516.19	0.0228376		0.04
10.42	1069	11139	0.0563819		0.03
10.41	1740	18113.4	0.0917722		0.02
10.4	4542	47236.8	0.239557		0.01
10.39	1062	11034.2	0.0560127		0
10.38	5550	57609	0.292722		-0.01
10.37	423	4386.51	0.0223101		-0.02
10.36	1690	17508.4	0.089135		-0.03
10.35	1038	10743.3	0.0547468		-0.04
	18960	10.3931
