# Supplementary material for: Interaction Wave Functions and Interaction-Based Coherence and Entanglement in Complex Adaptive Systems
Source: Research Square preprint supplement (doi:10.21203/rs.3.rs-6846233/v1), 2025-06-16
Supplement: Supplementary file 220 [file 30624.xls]

## Sheet: Sheet1
10.51	378	3972.78	0.0149283		0.09
10.5	2746	28833	0.108448		0.08
10.49	0	0	0		0.07
10.48	252	2640.96	0.00995221		0.06
10.47	897	9391.59	0.0354251		0.05
10.46	831	8692.26	0.0328186		0.04
10.45	827	8642.15	0.0326606		0.03
10.44	1491	15566	0.0588839		0.02
10.43	858	8948.94	0.0338849		0.01
10.42	3231	33667	0.127602		0
10.41	2790	29043.9	0.110185		-0.01
10.4	6706	69742.4	0.264839		-0.02
10.39	1343	13953.8	0.053039		-0.03
10.38	1735	18009.3	0.0685202		-0.04
10.37	368	3816.16	0.0145334		-0.05
10.36	399	4133.64	0.0157577		-0.06
10.35	150	1552.5	0.00592394		-0.07
10.34	160	1654.4	0.00631887		-0.08
10.33	143	1477.19	0.00564749		-0.09
10.32	11	113.52	0.000434422		-0.1
10.31	5	51.55	0.000197465		-0.11
	25321	10.4223
