# Supplementary material for: Interaction Wave Functions and Interaction-Based Coherence and Entanglement in Complex Adaptive Systems
Source: Research Square preprint supplement (doi:10.21203/rs.3.rs-6846233/v1), 2025-06-16
Supplement: Supplementary file 221 [file 30625.xls]

## Sheet: Sheet1
10.53	20	210.6	0.000938747		0.08
10.52	1860	19567.2	0.0873034		0.07
10.51	1289	13547.4	0.0605022		0.06
10.5	2549	26764.5	0.119643		0.05
10.49	2363	24787.9	0.110913		0.04
10.48	1893	19838.6	0.0888524		0.03
10.47	345	3612.15	0.0161934		0.02
10.46	401	4194.46	0.0188219		0.01
10.45	715	7471.75	0.0335602		0
10.44	1829	19094.8	0.0858484		-0.01
10.43	645	6727.35	0.0302746		-0.02
10.42	55	573.1	0.00258155		-0.03
10.41	1365	14209.7	0.0640695		-0.04
10.4	2590	26936	0.121568		-0.05
10.39	47	488.33	0.00220605		-0.06
10.38	2764	28690.3	0.129735		-0.07
10.37	575	5962.75	0.026989		-0.08
	21305	10.4519
