# Supplementary material for: Interaction Wave Functions and Interaction-Based Coherence and Entanglement in Complex Adaptive Systems
Source: Research Square preprint supplement (doi:10.21203/rs.3.rs-6846233/v1), 2025-06-16
Supplement: Supplementary file 222 [file 30626.xls]

## Sheet: Sheet1
10.7	5033	53853.1	0.126235		0.16
10.69	0	0	0		0.15
10.68	151	1612.68	0.00378731		0.14
10.67	134	1429.78	0.00336092		0.13
10.66	94	1002.04	0.00235766		0.12
10.65	3903	41567	0.0978932		0.11
10.64	0	0	0		0.1
10.63	137	1456.31	0.00343617		0.09
10.62	329	3493.98	0.00825182		0.08
10.61	910	9655.1	0.0228242		0.07
10.6	6861	72726.6	0.172084		0.06
10.59	277	2933.43	0.00694758		0.05
10.58	1602	16949.2	0.0401806		0.04
10.57	346	3657.22	0.0086782		0.03
10.56	590	6230.4	0.0147981		0.02
10.55	485	5116.75	0.0121645		0.01
10.54	1016	10708.6	0.0254828		0
10.53	0	0	0		-0.01
10.52	581	6112.12	0.0145724		-0.02
10.51	119	1250.69	0.0029847		-0.03
10.5	3243	34051.5	0.0813394		-0.04
10.49	13	136.37	0.00032606		-0.05
10.48	920	9641.6	0.023075		-0.06
10.47	652	6826.44	0.0163531		-0.07
10.46	2261	23650.1	0.0567093		-0.08
10.45	1157	12090.7	0.0290193		-0.09
10.44	1326	13843.4	0.0332581		-0.1
10.43	1252	13058.4	0.0314021		-0.11
10.42	883	9200.86	0.022147		-0.12
10.41	1539	16021	0.0386005		-0.13
10.4	1693	17607.2	0.042463		-0.14
10.39	868	9018.52	0.0217708		-0.15
10.38	617	6404.46	0.0154753		-0.16
10.37	76	788.12	0.0019062		-0.17
10.36	802	8308.72	0.0201154		-0.18
	39870	10.5443
