# Supplementary material for: Interaction Wave Functions and Interaction-Based Coherence and Entanglement in Complex Adaptive Systems
Source: Research Square preprint supplement (doi:10.21203/rs.3.rs-6846233/v1), 2025-06-16
Supplement: Supplementary file 223 [file 30627.xls]

## Sheet: Sheet1
10.72	629	6742.88	0.0172935		0.09
10.71	245	2623.95	0.00673595		0.08
10.7	1684	18018.8	0.0462994		0.07
10.69	2284	24416	0.0627956		0.06
10.68	809	8640.12	0.0222424		0.05
10.67	549	5857.83	0.015094		0.04
10.66	736	7845.76	0.0202353		0.03
10.65	12178	129696	0.334818		0.02
10.64	1704	18130.6	0.0468492		0.01
10.63	2527	26862	0.0694765		0
10.62	2865	30426.3	0.0787694		-0.01
10.61	301	3193.61	0.0082756		-0.02
10.6	4185	44361	0.115061		-0.03
10.59	697	7381.23	0.0191631		-0.04
10.58	719	7607.02	0.019768		-0.05
10.57	577	6098.89	0.0158639		-0.06
10.56	454	4794.24	0.0124821		-0.07
10.55	803	8471.65	0.0220774		-0.08
10.54	68	716.72	0.00186957		-0.09
10.53	1114	11730.4	0.030628		-0.1
10.52	470	4944.4	0.012922		-0.11
10.51	193	2028.43	0.00530628		-0.12
10.5	551	5785.5	0.015149		-0.13
10.49	30	314.7	0.00082481		-0.14
	36372	10.6315
