# Supplementary material for: Interaction Wave Functions and Interaction-Based Coherence and Entanglement in Complex Adaptive Systems
Source: Research Square preprint supplement (doi:10.21203/rs.3.rs-6846233/v1), 2025-06-16
Supplement: Supplementary file 224 [file 30602-06.xls]

## Sheet: Sheet1
0.16			787			787	125.92	0.0049979
0.15			0			0	0	0
0.14			754			754	105.56	0.00478834
0.13			1982			1982	257.66	0.0125868
0.12			1432			1432	171.84	0.00909403
0.11			1203			1203	132.33	0.00763974
0.1			266			266	26.6	0.00168925
0.09			1606			1606	144.54	0.010199
0.08			1691	611		2302	184.16	0.014619
0.07			1414	570	268	2252	157.64	0.0143015
0.06		68	1887	1549	612	4116	246.96	0.026139
0.05		569	5083	1925	329	7906	395.3	0.0502077
0.04	107	607	6127	1662	1855	10358	414.32	0.0657793
0.03	188	541	4251	958	1222	7160	214.8	0.0454701
0.02	1002	1132	5872	1850	1372	11228	224.56	0.0713043
0.01	3399	3297	3494	1776	1498	13464	134.64	0.0855042
0	9357	2679	4191	1762	2855	20844	0	0.132371
-0.01	7796	1887	4232	2495	6453	22863	-228.63	0.145193
-0.02	2683	2383	1302	4975	4312	15655	-313.1	0.0994183
-0.03		1577	5	1049	8	2639	-79.17	0.0167592
-0.04		102	2136	1671		3909	-156.36	0.0248244
-0.05		42	1439	982		2463	-123.15	0.0156415
-0.06		25	2878	2651		5554	-333.24	0.0352711
-0.07			1625	1710		3335	-233.45	0.0211792
-0.08			1103	150		1253	-100.24	0.00795727
-0.09			696			696	-62.64	0.00442
-0.1			659			659	-65.9	0.00418503
-0.11			431			431	-47.41	0.0027371
-0.12			371			371	-44.52	0.00235606
-0.13			1452			1452	-188.76	0.00922104
-0.14			1831			1831	-256.34	0.0116279
-0.15			475			475	-71.25	0.00301652
-0.16			1058			1058	-169.28	0.00671891
-0.17			1443			1443	-245.31	0.00916388
-0.18			1822			1822	-327.96	0.0115708
-0.19			1897			1897	-360.43	0.012047
						157466	-0.00298674
