# Supplementary material for: Interaction Wave Functions and Interaction-Based Coherence and Entanglement in Complex Adaptive Systems
Source: Research Square preprint supplement (doi:10.21203/rs.3.rs-6846233/v1), 2025-06-16
Supplement: Supplementary file 225 [file 30602.xls]

## Sheet: Sheet1
5.08	107	543.56	0.00436165		0.04
5.07	188	953.16	0.00766346		0.03
5.06	1002	5070.12	0.0408446		0.02
5.05	3399	17165	0.138554		0.01
5.04	9357	47159.3	0.38142		0
5.03	7796	39213.9	0.317789		-0.01
5.02	2683	13468.7	0.109367		-0.02
	24532	5.03724
