# Supplementary material for: Interaction Wave Functions and Interaction-Based Coherence and Entanglement in Complex Adaptive Systems
Source: Research Square preprint supplement (doi:10.21203/rs.3.rs-6846233/v1), 2025-06-16
Supplement: Supplementary file 226 [file 30603.xls]

## Sheet: Sheet1
5.14	68	349.52	0.004561		0.06
5.13	569	2918.97	0.0381649		0.05
5.12	607	3107.84	0.0407137		0.04
5.11	541	2764.51	0.0362868		0.03
5.1	1132	5773.2	0.0759273		0.02
5.09	3297	16781.7	0.221142		0.01
5.08	2679	13609.3	0.17969		0
5.07	1887	9567.09	0.126568		-0.01
5.06	2383	12058	0.159836		-0.02
5.05	1577	7963.85	0.105775		-0.03
5.04	102	514.08	0.00684151		-0.04
5.03	42	211.26	0.00281709		-0.05
5.02	25	125.5	0.00167684		-0.06
	14909	5.08048
