# Supplementary material for: Interaction Wave Functions and Interaction-Based Coherence and Entanglement in Complex Adaptive Systems
Source: Research Square preprint supplement (doi:10.21203/rs.3.rs-6846233/v1), 2025-06-16
Supplement: Supplementary file 227 [file 30604.xls]

## Sheet: Sheet1
5.38	787	4234.06	0.0114232		0.16
5.37	0	0	0		0.15
5.36	754	4041.44	0.0109442		0.14
5.35	1982	10603.7	0.0287684		0.13
5.34	1432	7646.88	0.0207853		0.12
5.33	1203	6411.99	0.0174614		0.11
5.32	266	1415.12	0.00386095		0.1
5.31	1606	8527.86	0.0233108		0.09
5.3	1691	8962.3	0.0245446		0.08
5.29	1414	7480.06	0.020524		0.07
5.28	1887	9963.36	0.0273895		0.06
5.27	5083	26787.4	0.0737789		0.05
5.26	6127	32228	0.0889324		0.04
5.25	4251	22317.8	0.0617026		0.03
5.24	5872	30769.3	0.0852311		0.02
5.23	3494	18273.6	0.0507149		0.01
5.22	4191	21877	0.0608317		0
5.21	4232	22048.7	0.0614268		-0.01
5.2	1302	6770.4	0.0188983		-0.02
5.19	5	25.95	7.25742e-05		-0.03
5.18	2136	11064.5	0.0310037		-0.04
5.17	1439	7439.63	0.0208869		-0.05
5.16	2878	14850.5	0.0417737		-0.06
5.15	1625	8368.75	0.0235866		-0.07
5.14	1103	5669.42	0.0160099		-0.08
5.13	696	3570.48	0.0101023		-0.09
5.12	659	3374.08	0.00956528		-0.1
5.11	431	2202.41	0.0062559		-0.11
5.1	371	1892.1	0.00538501		-0.12
5.09	1452	7390.68	0.0210755		-0.13
5.08	1831	9301.48	0.0265767		-0.14
5.07	475	2408.25	0.00689455		-0.15
5.06	1058	5353.48	0.0153567		-0.16
5.05	1443	7287.15	0.0209449		-0.17
5.04	1822	9182.88	0.026446		-0.18
5.03	1897	9541.91	0.0275347		-0.19
	68895	5.21493
