# Supplementary material for: Interaction Wave Functions and Interaction-Based Coherence and Entanglement in Complex Adaptive Systems
Source: Research Square preprint supplement (doi:10.21203/rs.3.rs-6846233/v1), 2025-06-16
Supplement: Supplementary file 228 [file 30605.xls]

## Sheet: Sheet1
5.22	611	3189.42	0.0215551		0.08
5.21	570	2969.7	0.0201087		0.07
5.2	1549	8054.8	0.0546462		0.06
5.19	1925	9990.75	0.0679108		0.05
5.18	1662	8609.16	0.0586326		0.04
5.17	958	4952.86	0.0337967		0.03
5.16	1850	9546	0.0652649		0.02
5.15	1776	9146.4	0.0626543		0.01
5.14	1762	9056.68	0.0621604		0
5.13	2495	12799.4	0.0880195		-0.01
5.12	4975	25472	0.17551		-0.02
5.11	1049	5360.39	0.037007		-0.03
5.1	1671	8522.1	0.0589501		-0.04
5.09	982	4998.38	0.0346433		-0.05
5.08	2651	13467.1	0.0935229		-0.06
5.07	1710	8669.7	0.060326		-0.07
5.06	150	759	0.00529175		-0.08
	28346	5.13525
