# Supplementary material for: Interaction Wave Functions and Interaction-Based Coherence and Entanglement in Complex Adaptive Systems
Source: Research Square preprint supplement (doi:10.21203/rs.3.rs-6846233/v1), 2025-06-16
Supplement: Supplementary file 229 [file 30606.xls]

## Sheet: Sheet1
5.13	268	1374.84	0.0128945		0.07
5.12	612	3133.44	0.0294457		0.06
5.11	329	1681.19	0.0158295		0.05
5.1	1855	9460.5	0.0892513		0.04
5.09	1222	6219.98	0.0587952		0.03
5.08	1372	6969.76	0.0660123		0.02
5.07	1498	7594.86	0.0720747		0.01
5.06	2855	14446.3	0.137365		0
5.05	6453	32587.7	0.310479		-0.01
5.04	4312	21732.5	0.207467		-0.02
5.03	8	40.24	0.000384911		-0.03
	20784	5.06357
