# Supplementary material for: Interaction Wave Functions and Interaction-Based Coherence and Entanglement in Complex Adaptive Systems
Source: Research Square preprint supplement (doi:10.21203/rs.3.rs-6846233/v1), 2025-06-16
Supplement: Supplementary file 230 [file 30609-13.xls]

## Sheet: Sheet1
0.05	60					60	3	0.000699651
0.04	500		30		658	1188	47.52	0.0138531
0.03	531	303	993	157	2073	4057	121.71	0.0473081
0.02	3069	801	2549	473	3336	10228	204.56	0.119267
0.01	2357	1973	3454	1514	8359	17657	176.57	0.205896
0	1643	1992	4999	4055	8382	21071	0	0.245706
-0.01	2385	2083	4041	3970	4696	17175	-171.75	0.200275
-0.02	1919	1443	2216	2280	1914	9772	-195.44	0.11395
-0.03	206	179	864		479	1728	-51.84	0.02015
-0.04			667		455	1122	-44.88	0.0130835
-0.05			424		529	953	-47.65	0.0111128
-0.06			172			172	-10.32	0.00200567
-0.07			269			269	-18.83	0.00313677
-0.08			132			132	-10.56	0.00153923
-0.09			173			173	-15.57	0.00201733
						85757	-0.000157188
