# Supplementary material for: Interaction Wave Functions and Interaction-Based Coherence and Entanglement in Complex Adaptive Systems
Source: Research Square preprint supplement (doi:10.21203/rs.3.rs-6846233/v1), 2025-06-16
Supplement: Supplementary file 231 [file 30609.xls]

## Sheet: Sheet1
5.09	60	305.4	0.0047356		0.05
5.08	500	2540	0.0394633		0.04
5.07	531	2692.17	0.04191		0.03
5.06	3069	15529.1	0.242226		0.02
5.05	2357	11902.9	0.18603		0.01
5.04	1643	8280.72	0.129676		0
5.03	2385	11996.6	0.18824		-0.01
5.02	1919	9633.38	0.15146		-0.02
5.01	206	1032.06	0.0162589		-0.03
	12670	5.04438
