# Supplementary material for: Interaction Wave Functions and Interaction-Based Coherence and Entanglement in Complex Adaptive Systems
Source: Research Square preprint supplement (doi:10.21203/rs.3.rs-6846233/v1), 2025-06-16
Supplement: Supplementary file 232 [file 30610.xls]

## Sheet: Sheet1
5.08	303	1539.24	0.0345339		0.03
5.07	801	4061.07	0.0912925		0.02
5.06	1973	9983.38	0.224869		0.01
5.05	1992	10059.6	0.227034		0
5.04	2083	10498.3	0.237406		-0.01
5.03	1443	7258.29	0.164463		-0.02
5.02	179	898.58	0.0204012		-0.03
	8774	5.04884
