# Supplementary material for: Interaction Wave Functions and Interaction-Based Coherence and Entanglement in Complex Adaptive Systems
Source: Research Square preprint supplement (doi:10.21203/rs.3.rs-6846233/v1), 2025-06-16
Supplement: Supplementary file 233 [file 30611.xls]

## Sheet: Sheet1
5.18	30	155.4	0.00142973		0.04
5.17	993	5133.81	0.047324		0.03
5.16	2549	13152.8	0.121479		0.02
5.15	3454	17788.1	0.164609		0.01
5.14	4999	25694.9	0.23824		0
5.13	4041	20730.3	0.192584		-0.01
5.12	2216	11345.9	0.105609		-0.02
5.11	864	4415.04	0.0411762		-0.03
5.1	667	3401.7	0.0317876		-0.04
5.09	424	2158.16	0.0202068		-0.05
5.08	172	873.76	0.00819711		-0.06
5.07	269	1363.83	0.0128199		-0.07
5.06	132	667.92	0.00629081		-0.08
5.05	173	873.65	0.00824477		-0.09
	20983	5.13536
