# Supplementary material for: Interaction Wave Functions and Interaction-Based Coherence and Entanglement in Complex Adaptive Systems
Source: Research Square preprint supplement (doi:10.21203/rs.3.rs-6846233/v1), 2025-06-16
Supplement: Supplementary file 234 [file 30612.xls]

## Sheet: Sheet1
5.15	157	808.55	0.0126115		0.03
5.14	473	2431.22	0.037995		0.02
5.13	1514	7766.82	0.121616		0.01
5.12	4055	20761.6	0.325729		0
5.11	3970	20286.7	0.318901		-0.01
5.1	2280	11628	0.183147		-0.02
	12449	5.1155
