# Supplementary material for: Interaction Wave Functions and Interaction-Based Coherence and Entanglement in Complex Adaptive Systems
Source: Research Square preprint supplement (doi:10.21203/rs.3.rs-6846233/v1), 2025-06-16
Supplement: Supplementary file 235 [file 30613.xls]

## Sheet: Sheet1
5.19	658	3415.02	0.0213076		0.04
5.18	2073	10738.1	0.0671287		0.03
5.17	3336	17247.1	0.108028		0.02
5.16	8359	43132.4	0.270684		0.01
5.15	8382	43167.3	0.271429		0
5.14	4696	24137.4	0.152068		-0.01
5.13	1914	9818.82	0.0619799		-0.02
5.12	479	2452.48	0.0155112		-0.03
5.11	455	2325.05	0.014734		-0.04
5.1	529	2697.9	0.0171303		-0.05
	30881	5.15306
