# Supplementary material for: Interaction Wave Functions and Interaction-Based Coherence and Entanglement in Complex Adaptive Systems
Source: Research Square preprint supplement (doi:10.21203/rs.3.rs-6846233/v1), 2025-06-16
Supplement: Supplementary file 236 [file 30616-20.xls]

## Sheet: Sheet1
0.07		7		72		79	5.53	0.000744672
0.06		302		138		440	26.4	0.00414754
0.05		463		193	71	727	36.35	0.00685287
0.04		569	200	514	848	2131	85.24	0.0200873
0.03	17	166	272	945	553	1953	58.59	0.0184094
0.02	360	1211	418	2129	1102	5220	104.4	0.0492049
0.01	2654	1075	1850	13323	1704	20606	206.06	0.194237
0	9514	2305	2092	11203	1754	26868	0	0.253264
-0.01	6186	3927	554	16159	2116	28942	-289.42	0.272814
-0.02	277	1659	1393	6065	3298	12692	-253.84	0.119638
-0.03			571	3471	259	4301	-129.03	0.0405422
-0.04				2128		2128	-85.12	0.020059
						106087	-0.00221365
