# Supplementary material for: Interaction Wave Functions and Interaction-Based Coherence and Entanglement in Complex Adaptive Systems
Source: Research Square preprint supplement (doi:10.21203/rs.3.rs-6846233/v1), 2025-06-16
Supplement: Supplementary file 237 [file 30616.xls]

## Sheet: Sheet1
5.19	17	88.23	0.00089436		0.03
5.18	360	1864.8	0.0189394		0.02
5.17	2654	13721.2	0.139625		0.01
5.16	9514	49092.2	0.500526		0
5.15	6186	31857.9	0.325442		-0.01
5.14	277	1423.78	0.0145728		-0.02
	19008	5.15826
