# Supplementary material for: Interaction Wave Functions and Interaction-Based Coherence and Entanglement in Complex Adaptive Systems
Source: Research Square preprint supplement (doi:10.21203/rs.3.rs-6846233/v1), 2025-06-16
Supplement: Supplementary file 238 [file 30617.xls]

## Sheet: Sheet1
5.18	7	36.26	0.00059911		0.07
5.17	302	1561.34	0.0258473		0.06
5.16	463	2389.08	0.0396268		0.05
5.15	569	2930.35	0.0486991		0.04
5.14	166	853.24	0.0142075		0.03
5.13	1211	6212.43	0.103646		0.02
5.12	1075	5504	0.0920062		0.01
5.11	2305	11778.6	0.197278		0
5.1	3927	20027.7	0.336101		-0.01
5.09	1659	8444.31	0.141989		-0.02
	11684	5.11274
