# Supplementary material for: Interaction Wave Functions and Interaction-Based Coherence and Entanglement in Complex Adaptive Systems
Source: Research Square preprint supplement (doi:10.21203/rs.3.rs-6846233/v1), 2025-06-16
Supplement: Supplementary file 239 [file 30618.xls]

## Sheet: Sheet1
5.14	200	1028	0.0272109		0.04
5.13	272	1395.36	0.0370068		0.03
5.12	418	2140.16	0.0568707		0.02
5.11	1850	9453.5	0.251701		0.01
5.1	2092	10669.2	0.284626		0
5.09	554	2819.86	0.0753741		-0.01
5.08	1393	7076.44	0.189524		-0.02
5.07	571	2894.97	0.0776871		-0.03
	7350	5.09898
