# Supplementary material for: Interaction Wave Functions and Interaction-Based Coherence and Entanglement in Complex Adaptive Systems
Source: Research Square preprint supplement (doi:10.21203/rs.3.rs-6846233/v1), 2025-06-16
Supplement: Supplementary file 240 [file 30619.xls]

## Sheet: Sheet1
5.09	72	366.48	0.00127796		0.07
5.08	138	701.04	0.00244941		0.06
5.07	193	978.51	0.00342563		0.05
5.06	514	2600.84	0.00912318		0.04
5.05	945	4772.25	0.0167732		0.03
5.04	2129	10730.2	0.0377884		0.02
5.03	13323	67014.7	0.236475		0.01
5.02	11203	56239.1	0.198846		0
5.01	16159	80956.6	0.286812		-0.01
5	6065	30325	0.10765		-0.02
4.99	3471	17320.3	0.0616081		-0.03
4.98	2128	10597.4	0.0377707		-0.04
	56340	5.01602
