# Supplementary material for: Interaction Wave Functions and Interaction-Based Coherence and Entanglement in Complex Adaptive Systems
Source: Research Square preprint supplement (doi:10.21203/rs.3.rs-6846233/v1), 2025-06-16
Supplement: Supplementary file 241 [file 30620.xls]

## Sheet: Sheet1
5.07	71	359.97	0.00606578		0.05
5.06	848	4290.88	0.0724477		0.04
5.05	553	2792.65	0.0472448		0.03
5.04	1102	5554.08	0.0941478		0.02
5.03	1704	8571.12	0.145579		0.01
5.02	1754	8805.08	0.14985		0
5.01	2116	10601.2	0.180777		-0.01
5	3298	16490	0.28176		-0.02
4.99	259	1292.41	0.0221273		-0.03
	11705	5.01985
