# Supplementary material for: Interaction Wave Functions and Interaction-Based Coherence and Entanglement in Complex Adaptive Systems
Source: Research Square preprint supplement (doi:10.21203/rs.3.rs-6846233/v1), 2025-06-16
Supplement: Supplementary file 242 [file 30623-27.xls]

## Sheet: Sheet1
0.06			171		141	312		0.00449076
0.05			62		856	918		0.0132132
0.04		50	326	318	2304	2998		0.0431516
0.03		487	340	4762	1811	7400		0.106512
0.02	131	1069	1633	5507	1421	9761		0.140495
0.01	682	3119	1821	2638	998	9258		0.133255
0	5174	1673	1120	3282	1113	12362		0.177932
-0.01	4473	465	678	5381	456	11453		0.164848
-0.02	1108	1554	981	2754	842	7239		0.104194
-0.03		173	1087	1145	2905	5310		0.0764293
-0.04				149	1566	1715		0.0246848
-0.05				350	400	750		0.0107951
						69476
