# Supplementary material for: Interaction Wave Functions and Interaction-Based Coherence and Entanglement in Complex Adaptive Systems
Source: Research Square preprint supplement (doi:10.21203/rs.3.rs-6846233/v1), 2025-06-16
Supplement: Supplementary file 243 [file 30623.xls]

## Sheet: Sheet1
5.02	131	657.62	0.0113243		0.02
5.01	682	3416.82	0.0589557		0.01
5	5174	25870	0.447268		0
4.99	4473	22320.3	0.38667		-0.01
4.98	1108	5517.84	0.0957815		-0.02
	11568	4.99503
