# Supplementary material for: Interaction Wave Functions and Interaction-Based Coherence and Entanglement in Complex Adaptive Systems
Source: Research Square preprint supplement (doi:10.21203/rs.3.rs-6846233/v1), 2025-06-16
Supplement: Supplementary file 244 [file 30624.xls]

## Sheet: Sheet1
5.03	50	251.5	0.00582072		0.04
5.02	487	2444.74	0.0566938		0.03
5.01	1069	5355.69	0.124447		0.02
5	3119	15595	0.363097		0.01
4.99	1673	8348.27	0.194761		0
4.98	465	2315.7	0.0541327		-0.01
4.97	1554	7723.38	0.180908		-0.02
4.96	173	858.08	0.0201397		-0.03
	8590	4.99329
