# Supplementary material for: Interaction Wave Functions and Interaction-Based Coherence and Entanglement in Complex Adaptive Systems
Source: Research Square preprint supplement (doi:10.21203/rs.3.rs-6846233/v1), 2025-06-16
Supplement: Supplementary file 245 [file 30625.xls]

## Sheet: Sheet1
5.02	171	858.42	0.0208055		0.06
5.01	62	310.62	0.0075435		0.05
5	326	1630	0.0396642		0.04
4.99	340	1696.6	0.0413676		0.03
4.98	1633	8132.34	0.198686		0.02
4.97	1821	9050.37	0.22156		0.01
4.96	1120	5555.2	0.13627		0
4.95	678	3356.1	0.0824918		-0.01
4.94	981	4846.14	0.119358		-0.02
4.93	1087	5358.91	0.132255		-0.03
	8219	4.96346
