# Supplementary material for: Interaction Wave Functions and Interaction-Based Coherence and Entanglement in Complex Adaptive Systems
Source: Research Square preprint supplement (doi:10.21203/rs.3.rs-6846233/v1), 2025-06-16
Supplement: Supplementary file 246 [file 30626.xls]

## Sheet: Sheet1
5.05	318	1605.9	0.0120977		0.04
5.04	4762	24000.5	0.181161		0.03
5.03	5507	27700.2	0.209503		0.02
5.02	2638	13242.8	0.100358		0.01
5.01	3282	16442.8	0.124857		0
5	5381	26905	0.20471		-0.01
4.99	2754	13742.5	0.104771		-0.02
4.98	1145	5702.1	0.0435593		-0.03
4.97	149	740.53	0.00566842		-0.04
4.96	350	1736	0.0133151		-0.05
	26286	5.01477
