# Supplementary material for: Interaction Wave Functions and Interaction-Based Coherence and Entanglement in Complex Adaptive Systems
Source: Research Square preprint supplement (doi:10.21203/rs.3.rs-6846233/v1), 2025-06-16
Supplement: Supplementary file 247 [file 30627.xls]

## Sheet: Sheet1
5.06	141	713.46	0.00951867		0.06
5.05	856	4322.8	0.0577871		0.05
5.04	2304	11612.2	0.155539		0.04
5.03	1811	9109.33	0.122257		0.03
5.02	1421	7133.42	0.0959293		0.02
5.01	998	4999.98	0.0673733		0.01
5	1113	5565	0.0751367		0
4.99	456	2275.44	0.0307838		-0.01
4.98	842	4193.16	0.056842		-0.02
4.97	2905	14437.9	0.196112		-0.03
4.96	1566	7767.36	0.105718		-0.04
4.95	400	1980	0.0270033		-0.05
	14813	5.00304
