# Supplementary material for: Interaction Wave Functions and Interaction-Based Coherence and Entanglement in Complex Adaptive Systems
Source: Research Square preprint supplement (doi:10.21203/rs.3.rs-6846233/v1), 2025-06-16
Supplement: Supplementary file 248 [file 30630.xls]

## Sheet: Sheet1
5.06	4480	22668.8	0.0853268		0.07
5.05	5277	26648.8	0.100507		0.06
5.04	1986	10009.4	0.0378257		0.05
5.03	927	4662.81	0.0176558		0.04
5.02	1763	8850.26	0.0335784		0.03
5.01	952	4769.52	0.018132		0.02
5	2179	10895	0.0415016		0.01
4.99	1781	8887.19	0.0339212		0
4.98	13517	67314.7	0.257447		-0.01
4.97	1436	7136.92	0.0273503		-0.02
4.96	11241	55755.4	0.214098		-0.03
4.95	4861	24062	0.0925834		-0.04
4.94	374	1847.56	0.00712327		-0.05
4.93	332	1636.76	0.00632333		-0.06
4.92	0	0	0		-0.07
4.91	884	4340.44	0.0168368		-0.08
4.9	114	558.6	0.00217126		-0.09
4.89	0	0	0		-0.1
4.88	0	0	0		-0.11
4.87	400	1948	0.00761847		-0.12
	52504	4.98995
