# Supplementary material for: Interaction Wave Functions and Interaction-Based Coherence and Entanglement in Complex Adaptive Systems
Source: Research Square preprint supplement (doi:10.21203/rs.3.rs-6846233/v1), 2025-06-16
Supplement: Supplementary file 249 [file 30602-06.xls]

## Sheet: Sheet1
0.39					5	5	1.95	5.21774e-05
0.38					0	0	0	0
0.37					1	1	0.37	1.04355e-05
0.36					0	0	0	0
0.35					0	0	0	0
0.34					2	2	0.68	2.08709e-05
0.33					10	10	3.3	0.000104355
0.32					0	0	0	0
0.31					0	0	0	0
0.3	119				0	119	35.7	0.00124182
0.29	0				101	101	29.29	0.00105398
0.28	0				0	0	0	0
0.27	0				43	43	11.61	0.000448725
0.26	0				50	50	13	0.000521774
0.25	0				131	131	32.75	0.00136705
0.24	0				5	5	1.2	5.21774e-05
0.23	44				0	44	10.12	0.000459161
0.22	0				48	48	10.56	0.000500903
0.21	0		16		11	27	5.67	0.000281758
0.2	5		0		74	79	15.8	0.000824402
0.19	3		5		105	113	21.47	0.00117921
0.18	0		112	502	0	614	110.52	0.00640738
0.17	0	28	23	251	104	406	69.02	0.0042368
0.16	0	24	2620	480	34	3158	505.28	0.0329552
0.15	46	12	422	393	238	1111	166.65	0.0115938
0.14	505	153	570	664	363	2255	315.7	0.023532
0.13	0	0	473	366	48	887	115.31	0.00925626
0.12	0	5	428	177	59	669	80.28	0.00698133
0.11	316	0	1968	224	160	2668	293.48	0.0278418
0.1	367	0	597	666	40	1670	167	0.0174272
0.09	53	125	1003	380	3640	5201	468.09	0.0542749
0.08	437	0	1812	934	921	4104	328.32	0.0428272
0.07	32	647	700	581	113	2073	145.11	0.0216327
0.06	13	18	2333	202	44	2610	156.6	0.0272366
0.05	609	47	106	182	507	1451	72.55	0.0151419
0.04	160	12	163	210	835	1380	55.2	0.014401
0.03	531	117	400	2027	328	3403	102.09	0.0355119
0.02	134	167	743	6	154	1204	24.08	0.0125643
0.01	480	45	245	725	397	1892	18.92	0.0197439
-1.97758e-16	2125	563	0	262	1175	4125	-8.15754e-13	0.0430463
-0.01	1005	2879	0	382	1383	5649	-56.49	0.05895
-0.02	390	276	298	2301	864	4129	-82.58	0.0430881
-0.03	953	1795	214	207	1403	4572	-137.16	0.047711
-0.04	11	224	7714	859	245	9053	-362.12	0.0944723
-0.05	1968	176	1043	146	274	3607	-180.35	0.0376407
-0.06	551		1379	336	2926	5192	-311.52	0.054181
-0.07	209		1511	17	971	2708	-189.56	0.0282593
-0.08	1327		1814	0	1271	4412	-352.96	0.0460413
-0.09	374		3009	0	1486	4869	-438.21	0.0508103
-0.1	144		306	33	1296	1779	-177.9	0.0185647
-0.11			1272	43	1183	2498	-274.78	0.0260678
-0.12			612	1706	28	2346	-281.52	0.0244816
-0.13			543	3		546	-70.98	0.00569777
-0.14			500	57		557	-77.98	0.00581256
-0.15				151		151	-22.65	0.00157576
-0.16				0		0	0	0
-0.17				247		247	-41.99	0.00257756
-0.18				881		881	-158.58	0.00919365
-0.19				57		57	-10.83	0.000594822
-0.2				269		269	-53.8	0.00280714
-0.21				219		219	-45.99	0.00228537
-0.22				393		393	-86.46	0.00410114
-0.23				34		34	-7.82	0.000354806
						95827	-0.00036065
