# Supplementary material for: Interaction Wave Functions and Interaction-Based Coherence and Entanglement in Complex Adaptive Systems
Source: Research Square preprint supplement (doi:10.21203/rs.3.rs-6846233/v1), 2025-06-16
Supplement: Supplementary file 250 [file 30602.xls]

## Sheet: Sheet1
15.95	119	1898.05	0.00921695		0.3
15.94	0	0	0		0.29
15.93	0	0	0		0.28
15.92	0	0	0		0.27
15.91	0	0	0		0.26
15.9	0	0	0		0.25
15.89	0	0	0		0.24
15.88	44	698.72	0.00340795		0.23
15.87	0	0	0		0.22
15.86	0	0	0		0.21
15.85	5	79.25	0.000387267		0.2
15.84	3	47.52	0.00023236		0.19
15.83	0	0	0		0.18
15.82	0	0	0		0.17
15.81	0	0	0		0.16
15.8	46	726.8	0.00356285		0.15
15.79	505	7973.95	0.0391139		0.14
15.78	0	0	0		0.13
15.77	0	0	0		0.12
15.76	316	4980.16	0.0244753		0.11
15.75	367	5780.25	0.0284254		0.1
15.74	53	834.22	0.00410503		0.09
15.73	437	6874.01	0.0338471		0.08
15.72	32	503.04	0.00247851		0.07
15.71	13	204.23	0.00100689		0.06
15.7	609	9561.3	0.0471691		0.05
15.69	160	2510.4	0.0123925		0.04
15.68	531	8326.08	0.0411277		0.03
15.67	134	2099.78	0.0103787		0.02
15.66	480	7516.8	0.0371776		0.01
15.65	2125	33256.3	0.164588		0
15.64	1005	15718.2	0.0778406		-0.01
15.63	390	6095.7	0.0302068		-0.02
15.62	953	14885.9	0.073813		-0.03
15.61	11	171.71	0.000851987		-0.04
15.6	1968	30700.8	0.152428		-0.05
15.59	551	8590.09	0.0426768		-0.06
15.58	209	3256.22	0.0161877		-0.07
15.57	1327	20661.4	0.102781		-0.08
15.56	374	5819.44	0.0289675		-0.09
15.55	144	2239.2	0.0111533		-0.1
	12911	15.6463
