# Supplementary material for: Interaction Wave Functions and Interaction-Based Coherence and Entanglement in Complex Adaptive Systems
Source: Research Square preprint supplement (doi:10.21203/rs.3.rs-6846233/v1), 2025-06-16
Supplement: Supplementary file 251 [file 30603.xls]

## Sheet: Sheet1
15.8	28	442.4	0.0038288		0.17
15.79	24	378.96	0.00328183		0.16
15.78	12	189.36	0.00164091		0.15
15.77	153	2412.81	0.0209216		0.14
15.76	0	0	0		0.13
15.75	5	78.75	0.000683714		0.12
15.74	0	0	0		0.11
15.73	0	0	0		0.1
15.72	125	1965	0.0170928		0.09
15.71	0	0	0		0.08
15.7	647	10157.9	0.0884726		0.07
15.69	18	282.42	0.00246137		0.06
15.68	47	736.96	0.00642691		0.05
15.67	12	188.04	0.00164091		0.04
15.66	117	1832.22	0.0159989		0.03
15.65	167	2613.55	0.022836		0.02
15.64	45	703.8	0.00615343		0.01
15.63	563	8799.69	0.0769862		0
15.62	2879	44970	0.393682		-0.01
15.61	276	4308.36	0.037741		-0.02
15.6	1795	28002	0.245453		-0.03
15.59	224	3492.16	0.0306304		-0.04
15.58	176	2742.08	0.0240667		-0.05
	7313	15.6292
