# Supplementary material for: Interaction Wave Functions and Interaction-Based Coherence and Entanglement in Complex Adaptive Systems
Source: Research Square preprint supplement (doi:10.21203/rs.3.rs-6846233/v1), 2025-06-16
Supplement: Supplementary file 252 [file 30604.xls]

## Sheet: Sheet1
15.65	16	250.4	0.000457744		0.21
15.64	0	0	0		0.2
15.63	5	78.15	0.000143045		0.19
15.62	112	1749.44	0.00320421		0.18
15.61	23	359.03	0.000658008		0.17
15.6	2620	40872	0.0749557		0.16
15.59	422	6578.98	0.012073		0.15
15.58	570	8880.6	0.0163071		0.14
15.57	473	7364.61	0.0135321		0.13
15.56	428	6659.68	0.0122447		0.12
15.55	1968	30602.4	0.0563026		0.11
15.54	597	9277.38	0.0170796		0.1
15.53	1003	15576.6	0.0286949		0.09
15.52	1812	28122.2	0.0518396		0.08
15.51	700	10857	0.0200263		0.07
15.5	2333	36161.5	0.0667449		0.06
15.49	106	1641.94	0.00303256		0.05
15.48	163	2523.24	0.00466327		0.04
15.47	400	6188	0.0114436		0.03
15.46	743	11486.8	0.0212565		0.02
15.45	245	3785.25	0.00700921		0.01
15.44	0	0	0		0
15.43	0	0	0		-0.01
15.42	298	4595.16	0.00852549		-0.02
15.41	214	3297.74	0.00612233		-0.03
15.4	7714	118796	0.22069		-0.04
15.39	1043	16051.8	0.0298392		-0.05
15.38	1379	21209	0.0394519		-0.06
15.37	1511	23224.1	0.0432282		-0.07
15.36	1814	27863	0.0518968		-0.08
15.35	3009	46188.2	0.0860846		-0.09
15.34	306	4694.04	0.00875436		-0.1
15.33	1272	19499.8	0.0363907		-0.11
15.32	612	9375.84	0.0175087		-0.12
15.31	543	8313.33	0.0155347		-0.13
15.3	500	7650	0.0143045		-0.14
	34954	15.4424
