# Supplementary material for: Interaction Wave Functions and Interaction-Based Coherence and Entanglement in Complex Adaptive Systems
Source: Research Square preprint supplement (doi:10.21203/rs.3.rs-6846233/v1), 2025-06-16
Supplement: Supplementary file 253 [file 30605.xls]

## Sheet: Sheet1
15.6	502	7831.2	0.0285666		0.18
15.59	251	3913.09	0.0142833		0.17
15.58	480	7478.4	0.0273146		0.16
15.57	393	6119.01	0.0223639		0.15
15.56	664	10331.8	0.0377852		0.14
15.55	366	5691.3	0.0208274		0.13
15.54	177	2750.58	0.0100723		0.12
15.53	224	3478.72	0.0127468		0.11
15.52	666	10336.3	0.037899		0.1
15.51	380	5893.8	0.0216241		0.09
15.5	934	14477	0.0531497		0.08
15.49	581	8999.69	0.0330621		0.07
15.48	202	3126.96	0.0114949		0.06
15.47	182	2815.54	0.0103568		0.05
15.46	210	3246.6	0.0119502		0.04
15.45	2027	31317.2	0.115347		0.03
15.44	6	92.64	0.000341433		0.02
15.43	725	11186.8	0.0412565		0.01
15.42	262	4040.04	0.0149092		0
15.41	382	5886.62	0.0217379		-0.01
15.4	2301	35435.4	0.13094		-0.02
15.39	207	3185.73	0.0117794		-0.03
15.38	859	13211.4	0.0488818		-0.04
15.37	146	2244.02	0.0083082		-0.05
15.36	336	5160.96	0.0191202		-0.06
15.35	17	260.95	0.000967393		-0.07
15.34	0	0	0		-0.08
15.33	0	0	0		-0.09
15.32	33	505.56	0.00187788		-0.1
15.31	43	658.33	0.00244694		-0.11
15.3	1706	26101.8	0.0970807		-0.12
15.29	3	45.87	0.000170716		-0.13
15.28	57	870.96	0.00324361		-0.14
15.27	151	2305.77	0.00859273		-0.15
15.26	0	0	0		-0.16
15.25	247	3766.75	0.0140557		-0.17
15.24	881	13426.4	0.0501337		-0.18
15.23	57	868.11	0.00324361		-0.19
15.22	269	4094.18	0.0153076		-0.2
15.21	219	3330.99	0.0124623		-0.21
15.2	393	5973.6	0.0223639		-0.22
15.19	34	516.46	0.00193479		-0.23
	17573	15.4201
