# Supplementary material for: Interaction Wave Functions and Interaction-Based Coherence and Entanglement in Complex Adaptive Systems
Source: Research Square preprint supplement (doi:10.21203/rs.3.rs-6846233/v1), 2025-06-16
Supplement: Supplementary file 254 [file 30606.xls]

## Sheet: Sheet1
15.5	5	77.5	0.000216675		0.39
15.49	0	0	0		0.38
15.48	1	15.48	4.33351e-05		0.37
15.47	0	0	0		0.36
15.46	0	0	0		0.35
15.45	2	30.9	8.66701e-05		0.34
15.44	10	154.4	0.000433351		0.33
15.43	0	0	0		0.32
15.42	0	0	0		0.31
15.41	0	0	0		0.3
15.4	101	1555.4	0.00437684		0.29
15.39	0	0	0		0.28
15.38	43	661.34	0.00186341		0.27
15.37	50	768.5	0.00216675		0.26
15.36	131	2012.16	0.00567689		0.25
15.35	5	76.75	0.000216675		0.24
15.34	0	0	0		0.23
15.33	48	735.84	0.00208008		0.22
15.32	11	168.52	0.000476686		0.21
15.31	74	1132.94	0.00320679		0.2
15.3	105	1606.5	0.00455018		0.19
15.29	0	0	0		0.18
15.28	104	1589.12	0.00450685		0.17
15.27	34	519.18	0.00147339		0.16
15.26	238	3631.88	0.0103137		0.15
15.25	363	5535.75	0.0157306		0.14
15.24	48	731.52	0.00208008		0.13
15.23	59	898.57	0.00255677		0.12
15.22	160	2435.2	0.00693361		0.11
15.21	40	608.4	0.0017334		0.1
15.2	3640	55328	0.15774		0.09
15.19	921	13990	0.0399116		0.08
15.18	113	1715.34	0.00489686		0.07
15.17	44	667.48	0.00190674		0.06
15.16	507	7686.12	0.0219709		0.05
15.15	835	12650.3	0.0361848		0.04
15.14	328	4965.92	0.0142139		0.03
15.13	154	2330.02	0.0066736		0.02
15.12	397	6002.64	0.017204		0.01
15.11	1175	17754.3	0.0509187		0
15.1	1383	20883.3	0.0599324		-0.01
15.09	864	13037.8	0.0374415		-0.02
15.08	1403	21157.2	0.0607991		-0.03
15.07	245	3692.15	0.0106171		-0.04
15.06	274	4126.44	0.0118738		-0.05
15.05	2926	44036.3	0.126798		-0.06
15.04	971	14603.8	0.0420783		-0.07
15.03	1271	19103.1	0.0550789		-0.08
15.02	1486	22319.7	0.0643959		-0.09
15.01	1296	19453	0.0561622		-0.1
15	1183	17745	0.0512654		-0.11
14.99	28	419.72	0.00121338		-0.12
	23076	15.1072
