# Supplementary material for: Interaction Wave Functions and Interaction-Based Coherence and Entanglement in Complex Adaptive Systems
Source: Research Square preprint supplement (doi:10.21203/rs.3.rs-6846233/v1), 2025-06-16
Supplement: Supplementary file 255 [file 30609-13.xls]

## Sheet: Sheet1
0.25				41		41	10.25	0.00053492
0.24		6		20		26	6.24	0.000339217
0.23		0		10		10	2.3	0.000130468
0.22		0		8		8	1.76	0.000104375
0.21		0		0		0	0	0
0.2		0		0		0	0	0
0.19		0		0		0	0	0
0.18		0		0		0	0	0
0.17		0		64		64	10.88	0.000834997
0.16		0		4		4	0.64	5.21873e-05
0.15		0		156		156	23.4	0.0020353
0.14		0		194	62	256	35.84	0.00333999
0.13		0		297	3	300	39	0.00391405
0.12		9		915	164	1088	130.56	0.0141949
0.11		0		398	89	487	53.57	0.0063538
0.1		56	200	340	719	1315	131.5	0.0171566
0.09		318	92	30	145	585	52.65	0.00763239
0.08	345	231	372	559	231	1738	139.04	0.0226754
0.07	2	0	454	647	807	1910	133.7	0.0249194
0.06	320	113	1519	52	856	2860	171.6	0.0373139
0.05	949	203	528	1340	653	3673	183.65	0.047921
0.04	125	53	1884	318	1224	3604	144.16	0.0470208
0.03	480	119	675	112	1936	3322	99.66	0.0433416
0.02	556	190	1070	1104	2811	5731	114.62	0.0747714
0.01	1360	277	4569	45	498	6749	67.49	0.088053
-8.67362e-17	8251	4073	114	263	452	13153	-1.14084e-12	0.171605
-0.01	900	1047	646	44	941	3578	-35.78	0.0466815
-0.02	876	724	986	0	561	3147	-62.94	0.0410584
-0.03	0	212	338	414	2871	3835	-115.05	0.0500346
-0.04	0	501	2067	4	308	2880	-115.2	0.0375749
-0.05	51	407	887	18	1158	2521	-126.05	0.032891
-0.06	0	9	461	15	887	1372	-82.32	0.0179002
-0.07	51	5	451	353	1319	2179	-152.53	0.028429
-0.08	6	64	58	5106	1718	6952	-556.16	0.0907015
-0.09	69	449	521	257	74	1370	-123.3	0.0178742
-0.1	250	11	13	141	21	436	-43.6	0.00568842
-0.11	3		84	0		87	-9.57	0.00113507
-0.12	80		126	24		230	-27.6	0.00300077
-0.13			17	247		264	-34.32	0.00344436
-0.14			373			373	-52.22	0.00486647
-0.15			234			234	-35.1	0.00305296
-0.16			23			23	-3.68	0.000300077
-0.17			19			19	-3.23	0.00024789
-0.18			52			52	-9.36	0.000678435
-0.19			0			0	0	0
-0.2			10			10	-2	0.000130468
-0.21			5			5	-1.05	6.52341e-05
						76647	-0.000502955
