# Supplementary material for: Interaction Wave Functions and Interaction-Based Coherence and Entanglement in Complex Adaptive Systems
Source: Research Square preprint supplement (doi:10.21203/rs.3.rs-6846233/v1), 2025-06-16
Supplement: Supplementary file 256 [file 30609.xls]

## Sheet: Sheet1
15.08	345	5202.6	0.023511		0.08
15.07	2	30.14	0.000136295		0.07
15.06	320	4819.2	0.0218073		0.06
15.05	949	14282.5	0.0646722		0.05
15.04	125	1880	0.00851847		0.04
15.03	480	7214.4	0.0327109		0.03
15.02	556	8351.12	0.0378901		0.02
15.01	1360	20413.6	0.0926809		0.01
15	8251	123765	0.562287		0
14.99	900	13491	0.061333		-0.01
14.98	876	13122.5	0.0596974		-0.02
14.97	0	0	0		-0.03
14.96	0	0	0		-0.04
14.95	51	762.45	0.00347553		-0.05
14.94	0	0	0		-0.06
14.93	51	761.43	0.00347553		-0.07
14.92	6	89.52	0.000408886		-0.08
14.91	69	1028.79	0.00470219		-0.09
14.9	250	3725	0.0170369		-0.1
14.89	3	44.67	0.000204443		-0.11
14.88	80	1190.4	0.00545182		-0.12
	14674	15.0044
