# Supplementary material for: Interaction Wave Functions and Interaction-Based Coherence and Entanglement in Complex Adaptive Systems
Source: Research Square preprint supplement (doi:10.21203/rs.3.rs-6846233/v1), 2025-06-16
Supplement: Supplementary file 257 [file 30610.xls]

## Sheet: Sheet1
15.24	6	91.44	0.000661011		0.24
15.23	0	0	0		0.23
15.22	0	0	0		0.22
15.21	0	0	0		0.21
15.2	0	0	0		0.2
15.19	0	0	0		0.19
15.18	0	0	0		0.18
15.17	0	0	0		0.17
15.16	0	0	0		0.16
15.15	0	0	0		0.15
15.14	0	0	0		0.14
15.13	0	0	0		0.13
15.12	9	136.08	0.000991517		0.12
15.11	0	0	0		0.11
15.1	56	845.6	0.00616944		0.1
15.09	318	4798.62	0.0350336		0.09
15.08	231	3483.48	0.0254489		0.08
15.07	0	0	0		0.07
15.06	113	1701.78	0.012449		0.06
15.05	203	3055.15	0.0223642		0.05
15.04	53	797.12	0.00583893		0.04
15.03	119	1788.57	0.0131101		0.03
15.02	190	2853.8	0.020932		0.02
15.01	277	4157.77	0.0305167		0.01
15	4073	61095	0.448717		0
14.99	1047	15694.5	0.115346		-0.01
14.98	724	10845.5	0.079762		-0.02
14.97	212	3173.64	0.0233557		-0.03
14.96	501	7494.96	0.0551944		-0.04
14.95	407	6084.65	0.0448386		-0.05
14.94	9	134.46	0.000991517		-0.06
14.93	5	74.65	0.000550843		-0.07
14.92	64	954.88	0.00705079		-0.08
14.91	449	6694.59	0.0494657		-0.09
14.9	11	163.9	0.00121185		-0.1
	9077	14.9962
