# Supplementary material for: Interaction Wave Functions and Interaction-Based Coherence and Entanglement in Complex Adaptive Systems
Source: Research Square preprint supplement (doi:10.21203/rs.3.rs-6846233/v1), 2025-06-16
Supplement: Supplementary file 258 [file 30611.xls]

## Sheet: Sheet1
15.39	200	3078	0.0106112		0.1
15.38	92	1414.96	0.00488115		0.09
15.37	372	5717.64	0.0197368		0.08
15.36	454	6973.44	0.0240874		0.07
15.35	1519	23316.7	0.0805921		0.06
15.34	528	8099.52	0.0280136		0.05
15.33	1884	28881.7	0.0999576		0.04
15.32	675	10341	0.0358128		0.03
15.31	1070	16381.7	0.0567699		0.02
15.3	4569	69905.7	0.242413		0.01
15.29	114	1743.06	0.00604839		0
15.28	646	9870.88	0.0342742		-0.01
15.27	986	15056.2	0.0523132		-0.02
15.26	338	5157.88	0.0179329		-0.03
15.25	2067	31521.8	0.109667		-0.04
15.24	887	13517.9	0.0470607		-0.05
15.23	461	7021.03	0.0244588		-0.06
15.22	451	6864.22	0.0239283		-0.07
15.21	58	882.18	0.00307725		-0.08
15.2	521	7919.2	0.0276422		-0.09
15.19	13	197.47	0.000689728		-0.1
15.18	84	1275.12	0.00445671		-0.11
15.17	126	1911.42	0.00668506		-0.12
15.16	17	257.72	0.000901952		-0.13
15.15	373	5650.95	0.0197899		-0.14
15.14	234	3542.76	0.0124151		-0.15
15.13	23	347.99	0.00122029		-0.16
15.12	19	287.28	0.00100806		-0.17
15.11	52	785.72	0.00275891		-0.18
15.1	0	0	0		-0.19
15.09	10	150.9	0.00053056		-0.2
15.08	5	75.4	0.00026528		-0.21
	18848	15.288
