# Supplementary material for: Interaction Wave Functions and Interaction-Based Coherence and Entanglement in Complex Adaptive Systems
Source: Research Square preprint supplement (doi:10.21203/rs.3.rs-6846233/v1), 2025-06-16
Supplement: Supplementary file 259 [file 30612.xls]

## Sheet: Sheet1
15.43	41	632.63	0.00302806		0.25
15.42	20	308.4	0.0014771		0.24
15.41	10	154.1	0.000738552		0.23
15.4	8	123.2	0.000590842		0.22
15.39	0	0	0		0.21
15.38	0	0	0		0.2
15.37	0	0	0		0.19
15.36	0	0	0		0.18
15.35	64	982.4	0.00472674		0.17
15.34	4	61.36	0.000295421		0.16
15.33	156	2391.48	0.0115214		0.15
15.32	194	2972.08	0.0143279		0.14
15.31	297	4547.07	0.021935		0.13
15.3	915	13999.5	0.0675775		0.12
15.29	398	6085.42	0.0293944		0.11
15.28	340	5195.2	0.0251108		0.1
15.27	30	458.1	0.00221566		0.09
15.26	559	8530.34	0.0412851		0.08
15.25	647	9866.75	0.0477843		0.07
15.24	52	792.48	0.00384047		0.06
15.23	1340	20408.2	0.098966		0.05
15.22	318	4839.96	0.023486		0.04
15.21	112	1703.52	0.00827179		0.03
15.2	1104	16780.8	0.0815362		0.02
15.19	45	683.55	0.00332349		0.01
15.18	263	3992.34	0.0194239		0
15.17	44	667.48	0.00324963		-0.01
15.16	0	0	0		-0.02
15.15	414	6272.1	0.0305761		-0.03
15.14	4	60.56	0.000295421		-0.04
15.13	18	272.34	0.00132939		-0.05
15.12	15	226.8	0.00110783		-0.06
15.11	353	5333.83	0.0260709		-0.07
15.1	5106	77100.6	0.377105		-0.08
15.09	257	3878.13	0.0189808		-0.09
15.08	141	2126.28	0.0104136		-0.1
15.07	0	0	0		-0.11
15.06	24	361.44	0.00177253		-0.12
15.05	247	3717.35	0.0182422		-0.13
	13540	15.1792
