# Supplementary material for: Interaction Wave Functions and Interaction-Based Coherence and Entanglement in Complex Adaptive Systems
Source: Research Square preprint supplement (doi:10.21203/rs.3.rs-6846233/v1), 2025-06-16
Supplement: Supplementary file 260 [file 30613.xls]

## Sheet: Sheet1
15.22	62	943.64	0.00302321		0.14
15.21	3	45.63	0.000146284		0.13
15.2	164	2492.8	0.00799688		0.12
15.19	89	1351.91	0.00433977		0.11
15.18	719	10914.4	0.0350595		0.1
15.17	145	2199.65	0.00707041		0.09
15.16	231	3501.96	0.0112639		0.08
15.15	807	12226.1	0.0393505		0.07
15.14	856	12959.8	0.0417398		0.06
15.13	653	9879.89	0.0318412		0.05
15.12	1224	18506.9	0.059684		0.04
15.11	1936	29253	0.0944022		0.03
15.1	2811	42446.1	0.137068		0.02
15.09	498	7514.82	0.0242832		0.01
15.08	452	6816.16	0.0220402		0
15.07	941	14180.9	0.0458845		-0.01
15.06	561	8448.66	0.0273552		-0.02
15.05	2871	43208.6	0.139994		-0.03
15.04	308	4632.32	0.0150185		-0.04
15.03	1158	17404.7	0.0564658		-0.05
15.02	887	13322.7	0.0432514		-0.06
15.01	1319	19798.2	0.0643164		-0.07
15	1718	25770	0.0837722		-0.08
14.99	74	1109.26	0.00360835		-0.09
14.98	21	314.58	0.00102399		-0.1
	20508	15.0791
