# Supplementary material for: Interaction Wave Functions and Interaction-Based Coherence and Entanglement in Complex Adaptive Systems
Source: Research Square preprint supplement (doi:10.21203/rs.3.rs-6846233/v1), 2025-06-16
Supplement: Supplementary file 261 [file 30616-20.xls]

## Sheet: Sheet1
0.24					4	4	0.96	7.9775e-05
0.23					0	0	0	0
0.22					73	73	16.06	0.00145589
0.21				10	5	15	3.15	0.000299156
0.2				107	0	107	21.4	0.00213398
0.19				34	68	102	19.38	0.00203426
0.18				2	26	28	5.04	0.000558425
0.17				575	0	575	97.75	0.0114677
0.16				4	0	4	0.64	7.9775e-05
0.15	158			2	0	160	24	0.003191
0.14	4			22	200	226	31.64	0.00450729
0.13	52			3	2	57	7.41	0.00113679
0.12	10			0	336	346	41.52	0.00690054
0.11	0	81		59	0	140	15.4	0.00279213
0.1	62	27	132	0	0	221	22.1	0.00440757
0.09	1479	0	0	0	10	1489	134.01	0.0296963
0.08	2254	13	613	298	0	3178	254.24	0.0633813
0.07	4	55	88	1346	0	1493	104.51	0.029776
0.06	5	62	139	81	33	320	19.2	0.006382
0.05	155	137	238	214	422	1166	58.3	0.0232544
0.04	668	99	203	0	347	1317	52.68	0.0262659
0.03	439	130	660	47	267	1543	46.29	0.0307732
0.02	241	4232	134	2064	567	7238	144.76	0.144353
0.01	20	383	230	46	114	793	7.93	0.0158154
-8.67362e-17	296	622	276	238	1204	2636	-2.28637e-13	0.0525717
-0.01	2652	267	727	394	1211	5251	-52.51	0.104725
-0.02	336	871	1081	545	541	3374	-67.48	0.0672902
-0.03	548	920	0	5921	1963	9352	-280.56	0.186514
-0.04	144	31	0	30	113	318	-12.72	0.00634212
-0.05	1194	40	3	813	222	2272	-113.6	0.0453122
-0.06	1292	14	0	20	635	1961	-117.66	0.0391097
-0.07	310	45	9	169		533	-37.31	0.01063
-0.08	478	1337	0	120		1935	-154.8	0.0385912
-0.09	170		17			187	-16.83	0.00372948
-0.1	701		18			719	-71.9	0.0143396
-0.11	358		54			412	-45.32	0.00821683
-0.12			596			596	-71.52	0.0118865
						50141	0.00171835
