# Supplementary material for: Interaction Wave Functions and Interaction-Based Coherence and Entanglement in Complex Adaptive Systems
Source: Research Square preprint supplement (doi:10.21203/rs.3.rs-6846233/v1), 2025-06-16
Supplement: Supplementary file 262 [file 30616.xls]

## Sheet: Sheet1
15.06	158	2379.48	0.0112616		0.15
15.05	4	60.2	0.000285103		0.14
15.04	52	782.08	0.00370634		0.13
15.03	10	150.3	0.000712758		0.12
15.02	0	0	0		0.11
15.01	62	930.62	0.0044191		0.1
15	1479	22185	0.105417		0.09
14.99	2254	33787.5	0.160656		0.08
14.98	4	59.92	0.000285103		0.07
14.97	5	74.85	0.000356379		0.06
14.96	155	2318.8	0.0110478		0.05
14.95	668	9986.6	0.0476123		0.04
14.94	439	6558.66	0.0312901		0.03
14.93	241	3598.13	0.0171775		0.02
14.92	20	298.4	0.00142552		0.01
14.91	296	4413.36	0.0210976		0
14.9	2652	39514.8	0.189024		-0.01
14.89	336	5003.04	0.0239487		-0.02
14.88	548	8154.24	0.0390592		-0.03
14.87	144	2141.28	0.0102637		-0.04
14.86	1194	17742.8	0.0851033		-0.05
14.85	1292	19186.2	0.0920884		-0.06
14.84	310	4600.4	0.0220955		-0.07
14.83	478	7088.74	0.0340699		-0.08
14.82	170	2519.4	0.0121169		-0.09
14.81	701	10381.8	0.0499644		-0.1
14.8	358	5298.4	0.0255167		-0.11
	14030	14.912
