# Supplementary material for: Interaction Wave Functions and Interaction-Based Coherence and Entanglement in Complex Adaptive Systems
Source: Research Square preprint supplement (doi:10.21203/rs.3.rs-6846233/v1), 2025-06-16
Supplement: Supplementary file 263 [file 30617.xls]

## Sheet: Sheet1
14.99	81	1214.19	0.0086483		0.11
14.98	27	404.46	0.00288277		0.1
14.97	0	0	0		0.09
14.96	13	194.48	0.001388		0.08
14.95	55	822.25	0.0058723		0.07
14.94	62	926.28	0.00661969		0.06
14.93	137	2045.41	0.0146274		0.05
14.92	99	1477.08	0.0105701		0.04
14.91	130	1938.3	0.01388		0.03
14.9	4232	63056.8	0.451847		0.02
14.89	383	5702.87	0.0408926		0.01
14.88	622	9255.36	0.0664104		0
14.87	267	3970.29	0.0285074		-0.01
14.86	871	12943.1	0.0929959		-0.02
14.85	920	13662	0.0982276		-0.03
14.84	31	460.04	0.00330984		-0.04
14.83	40	593.2	0.00427077		-0.05
14.82	14	207.48	0.00149477		-0.06
14.81	45	666.45	0.00480461		-0.07
14.8	1337	19787.6	0.14275		-0.08
	9366	14.8759
