# Supplementary material for: Interaction Wave Functions and Interaction-Based Coherence and Entanglement in Complex Adaptive Systems
Source: Research Square preprint supplement (doi:10.21203/rs.3.rs-6846233/v1), 2025-06-16
Supplement: Supplementary file 264 [file 30618.xls]

## Sheet: Sheet1
15.12	132	1995.84	0.025297		0.1
15.11	0	0	0		0.09
15.1	613	9256.3	0.117478		0.08
15.09	88	1327.92	0.0168647		0.07
15.08	139	2096.12	0.0266386		0.06
15.07	238	3586.66	0.0456113		0.05
15.06	203	3057.18	0.0389038		0.04
15.05	660	9933	0.126485		0.03
15.04	134	2015.36	0.0256803		0.02
15.03	230	3456.9	0.0440782		0.01
15.02	276	4145.52	0.0528938		0
15.01	727	10912.3	0.139325		-0.01
15	1081	16215	0.207167		-0.02
14.99	0	0	0		-0.03
14.98	0	0	0		-0.04
14.97	3	44.91	0.000574933		-0.05
14.96	0	0	0		-0.06
14.95	9	134.55	0.0017248		-0.07
14.94	0	0	0		-0.08
14.93	17	253.81	0.00325795		-0.09
14.92	18	268.56	0.0034496		-0.1
14.91	54	805.14	0.0103488		-0.11
14.9	596	8880.4	0.11422		-0.12
	5218	15.0221
