# Supplementary material for: Interaction Wave Functions and Interaction-Based Coherence and Entanglement in Complex Adaptive Systems
Source: Research Square preprint supplement (doi:10.21203/rs.3.rs-6846233/v1), 2025-06-16
Supplement: Supplementary file 265 [file 30619.xls]

## Sheet: Sheet1
15.14	10	151.4	0.000759648		0.21
15.13	107	1618.91	0.00812823		0.2
15.12	34	514.08	0.0025828		0.19
15.11	2	30.22	0.00015193		0.18
15.1	575	8682.5	0.0436797		0.17
15.09	4	60.36	0.000303859		0.16
15.08	2	30.16	0.00015193		0.15
15.07	22	331.54	0.00167122		0.14
15.06	3	45.18	0.000227894		0.13
15.05	0	0	0		0.12
15.04	59	887.36	0.00448192		0.11
15.03	0	0	0		0.1
15.02	0	0	0		0.09
15.01	298	4472.98	0.0226375		0.08
15	1346	20190	0.102249		0.07
14.99	81	1214.19	0.00615314		0.06
14.98	214	3205.72	0.0162565		0.05
14.97	0	0	0		0.04
14.96	47	703.12	0.00357034		0.03
14.95	2064	30856.8	0.156791		0.02
14.94	46	687.24	0.00349438		0.01
14.93	238	3553.34	0.0180796		0
14.92	394	5878.48	0.0299301		-0.01
14.91	545	8125.95	0.0414008		-0.02
14.9	5921	88222.9	0.449787		-0.03
14.89	30	446.7	0.00227894		-0.04
14.88	813	12097.4	0.0617593		-0.05
14.87	20	297.4	0.0015193		-0.06
14.86	169	2511.34	0.012838		-0.07
14.85	120	1782	0.00911577		-0.08
	13164	14.9345
