# Supplementary material for: Interaction Wave Functions and Interaction-Based Coherence and Entanglement in Complex Adaptive Systems
Source: Research Square preprint supplement (doi:10.21203/rs.3.rs-6846233/v1), 2025-06-16
Supplement: Supplementary file 266 [file 30620.xls]

## Sheet: Sheet1
14.9	4	59.6	0.000478297		0.24
14.89	0	0	0		0.23
14.88	73	1086.24	0.00872893		0.22
14.87	5	74.35	0.000597872		0.21
14.86	0	0	0		0.2
14.85	68	1009.8	0.00813105		0.19
14.84	26	385.84	0.00310893		0.18
14.83	0	0	0		0.17
14.82	0	0	0		0.16
14.81	0	0	0		0.15
14.8	200	2960	0.0239149		0.14
14.79	2	29.58	0.000239149		0.13
14.78	336	4966.08	0.040177		0.12
14.77	0	0	0		0.11
14.76	0	0	0		0.1
14.75	10	147.5	0.00119574		0.09
14.74	0	0	0		0.08
14.73	0	0	0		0.07
14.72	33	485.76	0.00394595		0.06
14.71	422	6207.62	0.0504604		0.05
14.7	347	5100.9	0.0414923		0.04
14.69	267	3922.23	0.0319263		0.03
14.68	567	8323.56	0.0677986		0.02
14.67	114	1672.38	0.0136315		0.01
14.66	1204	17650.6	0.143967		0
14.65	1211	17741.2	0.144804		-0.01
14.64	541	7920.24	0.0646897		-0.02
14.63	1963	28718.7	0.234724		-0.03
14.62	113	1652.06	0.0135119		-0.04
14.61	222	3243.42	0.0265455		-0.05
14.6	635	9271	0.0759297		-0.06
	8363	14.6632
