# Supplementary material for: Interaction Wave Functions and Interaction-Based Coherence and Entanglement in Complex Adaptive Systems
Source: Research Square preprint supplement (doi:10.21203/rs.3.rs-6846233/v1), 2025-06-16
Supplement: Supplementary file 267 [file 30623-27.xls]

## Sheet: Sheet1
0.41					500	500		0.00712951
0.4					0	0		0
0.39					0	0		0
0.38					0	0		0
0.37					0	0		0
0.36					0	0		0
0.35					0	0		0
0.34					0	0		0
0.33				22	0	22		0.000313699
0.32				217	0	217		0.00309421
0.31				5	0	5		7.12951e-05
0.3				0	0	0		0
0.29			71	305	0	376		0.0053614
0.28			500	80	0	580		0.00827024
0.27			0	218	0	218		0.00310847
0.26			0	0	0	0		0
0.25			0	265	0	265		0.00377864
0.24			0	1133	0	1133		0.0161555
0.23			0	383	0	383		0.00546121
0.22			0	65	0	65		0.000926837
0.21			0	56	0	56		0.000798506
0.2			0	404	0	404		0.00576065
0.19			0	1519	0	1519		0.0216595
0.18			0	266	0	266		0.0037929
0.17			0	216	0	216		0.00307995
0.16			0	55	0	55		0.000784247
0.15			0	44	66	110		0.00156849
0.14			0	559	586	1145		0.0163266
0.13			0	136	231	367		0.00523306
0.12			0	5	801	806		0.0114928
0.11			0	0	1538	1538		0.0219304
0.1			0	0	720	720		0.0102665
0.09			0	418	297	715		0.0101952
0.08			410	1	123	534		0.00761432
0.07		51	338	160	65	614		0.00875504
0.06	6271	498	127	8	39	6943		0.0990004
0.05	1172	94	241	25	27	1559		0.0222298
0.04	131	979	679	636	164	2589		0.0369166
0.03	178	308	0	466	20	972		0.0138598
0.02	100	94	165	249	46	654		0.00932541
0.01	275	342	375	690	450	2132		0.0304003
-2.5327e-16	1189	104	533	334	135	2295		0.0327245
-0.01	0	356	7190	2400	246	10192		0.145328
-0.02	27	31	183	909	0	1150		0.0163979
-0.03	61	0	684	321	117	1183		0.0168684
-0.04	434	0	44	100	0	578		0.00824172
-0.05	3752	0	153	95	0	4000		0.0570361
-0.06	169	1230	1202	1151	0	3752		0.0534999
-0.07	124	0	0	73	0	197		0.00280903
-0.08	68	3	4	613	5	693		0.00988151
-0.09	85		0	1714	424	2223		0.0316978
-0.1	1924		0	859	0	2783		0.0396829
-0.11	0		770	3483	108	4361		0.0621836
-0.12	74		51	100	0	225		0.00320828
-0.13	515			1627	0	2142		0.0305428
-0.14	0			1382	90	1472		0.0209893
-0.15	5			520	4	529		0.00754303
-0.16				754	322	1076		0.0153427
-0.17				0	393	393		0.0056038
-0.18				0	64	64		0.000912578
-0.19				10	2376	2386		0.034022
-0.2				300	23	323		0.00460567
-0.21				4	292	296		0.00422067
-0.22					35	35		0.000499066
-0.23					5	5		7.12951e-05
-0.24					100	100		0.0014259
						70131
