# Supplementary material for: Interaction Wave Functions and Interaction-Based Coherence and Entanglement in Complex Adaptive Systems
Source: Research Square preprint supplement (doi:10.21203/rs.3.rs-6846233/v1), 2025-06-16
Supplement: Supplementary file 268 [file 30623.xls]

## Sheet: Sheet1
14.61	6271	91619.3	0.378821		0.06
14.6	1172	17111.2	0.0707986		0.05
14.59	131	1911.29	0.0079135		0.04
14.58	178	2595.24	0.0107527		0.03
14.57	100	1457	0.00604084		0.02
14.56	275	4004	0.0166123		0.01
14.55	1189	17300	0.0718255		0
14.54	0	0	0		-0.01
14.53	27	392.31	0.00163103		-0.02
14.52	61	885.72	0.00368491		-0.03
14.51	434	6297.34	0.0262172		-0.04
14.5	3752	54404	0.226652		-0.05
14.49	169	2448.81	0.010209		-0.06
14.48	124	1795.52	0.00749064		-0.07
14.47	68	983.96	0.00410777		-0.08
14.46	85	1229.1	0.00513471		-0.09
14.45	1924	27801.8	0.116226		-0.1
14.44	0	0	0		-0.11
14.43	74	1067.82	0.00447022		-0.12
14.42	515	7426.3	0.0311103		-0.13
14.41	0	0	0		-0.14
14.4	5	72	0.000302042		-0.15
	16554	14.5465
