# Supplementary material for: Interaction Wave Functions and Interaction-Based Coherence and Entanglement in Complex Adaptive Systems
Source: Research Square preprint supplement (doi:10.21203/rs.3.rs-6846233/v1), 2025-06-16
Supplement: Supplementary file 269 [file 30624.xls]

## Sheet: Sheet1
14.73	51	751.23	0.0124694		0.07
14.72	498	7330.56	0.12176		0.06
14.71	94	1382.74	0.0229829		0.05
14.7	979	14391.3	0.239364		0.04
14.69	308	4524.52	0.0753056		0.03
14.68	94	1379.92	0.0229829		0.02
14.67	342	5017.14	0.0836186		0.01
14.66	104	1524.64	0.0254279		0
14.65	356	5215.4	0.0870416		-0.01
14.64	31	453.84	0.00757946		-0.02
14.63	0	0	0		-0.03
14.62	0	0	0		-0.04
14.61	0	0	0		-0.05
14.6	1230	17958	0.300733		-0.06
14.59	0	0	0		-0.07
14.58	3	43.74	0.000733496		-0.08
	4090	14.6633
