# Supplementary material for: Interaction Wave Functions and Interaction-Based Coherence and Entanglement in Complex Adaptive Systems
Source: Research Square preprint supplement (doi:10.21203/rs.3.rs-6846233/v1), 2025-06-16
Supplement: Supplementary file 270 [file 30625.xls]

## Sheet: Sheet1
14.9	71	1057.9	0.00517493		0.29
14.89	500	7445	0.0364431		0.28
14.88	0	0	0		0.27
14.87	0	0	0		0.26
14.86	0	0	0		0.25
14.85	0	0	0		0.24
14.84	0	0	0		0.23
14.83	0	0	0		0.22
14.82	0	0	0		0.21
14.81	0	0	0		0.2
14.8	0	0	0		0.19
14.79	0	0	0		0.18
14.78	0	0	0		0.17
14.77	0	0	0		0.16
14.76	0	0	0		0.15
14.75	0	0	0		0.14
14.74	0	0	0		0.13
14.73	0	0	0		0.12
14.72	0	0	0		0.11
14.71	0	0	0		0.1
14.7	0	0	0		0.09
14.69	410	6022.9	0.0298834		0.08
14.68	338	4961.84	0.0246356		0.07
14.67	127	1863.09	0.00925656		0.06
14.66	241	3533.06	0.0175656		0.05
14.65	679	9947.35	0.0494898		0.04
14.64	0	0	0		0.03
14.63	165	2413.95	0.0120262		0.02
14.62	375	5482.5	0.0273324		0.01
14.61	533	7787.13	0.0388484		0
14.6	7190	104974	0.524052		-0.01
14.59	183	2669.97	0.0133382		-0.02
14.58	684	9972.72	0.0498542		-0.03
14.57	44	641.08	0.003207		-0.04
14.56	153	2227.68	0.0111516		-0.05
14.55	1202	17489.1	0.0876093		-0.06
14.54	0	0	0		-0.07
14.53	4	58.12	0.000291545		-0.08
14.52	0	0	0		-0.09
14.51	0	0	0		-0.1
14.5	770	11165	0.0561224		-0.11
14.49	51	738.99	0.0037172		-0.12
	13720	14.6102
