# Supplementary material for: Interaction Wave Functions and Interaction-Based Coherence and Entanglement in Complex Adaptive Systems
Source: Research Square preprint supplement (doi:10.21203/rs.3.rs-6846233/v1), 2025-06-16
Supplement: Supplementary file 271 [file 30626.xls]

## Sheet: Sheet1
15.14	22	333.08	0.000867679		0.33
15.13	217	3283.21	0.00855847		0.32
15.12	5	75.6	0.0001972		0.31
15.11	0	0	0		0.3
15.1	305	4605.5	0.0120292		0.29
15.09	80	1207.2	0.0031552		0.28
15.08	218	3287.44	0.00859791		0.27
15.07	0	0	0		0.26
15.06	265	3990.9	0.0104516		0.25
15.05	1133	17051.7	0.0446855		0.24
15.04	383	5760.32	0.0151055		0.23
15.03	65	976.95	0.0025636		0.22
15.02	56	841.12	0.00220864		0.21
15.01	404	6064.04	0.0159337		0.2
15	1519	22785	0.0599093		0.19
14.99	266	3987.34	0.010491		0.18
14.98	216	3235.68	0.00851903		0.17
14.97	55	823.35	0.0021692		0.16
14.96	44	658.24	0.00173536		0.15
14.95	559	8357.05	0.0220469		0.14
14.94	136	2031.84	0.00536383		0.13
14.93	5	74.65	0.0001972		0.12
14.92	0	0	0		0.11
14.91	0	0	0		0.1
14.9	418	6228.2	0.0164859		0.09
14.89	1	14.89	3.944e-05		0.08
14.88	160	2380.8	0.00631039		0.07
14.87	8	118.96	0.00031552		0.06
14.86	25	371.5	0.000985999		0.05
14.85	636	9444.6	0.0250838		0.04
14.84	466	6915.44	0.018379		0.03
14.83	249	3692.67	0.00982055		0.02
14.82	690	10225.8	0.0272136		0.01
14.81	334	4946.54	0.0131729		0
14.8	2400	35520	0.0946559		-0.01
14.79	909	13444.1	0.0358509		-0.02
14.78	321	4744.38	0.0126602		-0.03
14.77	100	1477	0.003944		-0.04
14.76	95	1402.2	0.0037468		-0.05
14.75	1151	16977.3	0.0453954		-0.06
14.74	73	1076.02	0.00287912		-0.07
14.73	613	9029.49	0.0241767		-0.08
14.72	1714	25230.1	0.0676001		-0.09
14.71	859	12635.9	0.0338789		-0.1
14.7	3483	51200.1	0.137369		-0.11
14.69	100	1469	0.003944		-0.12
14.68	1627	23884.4	0.0641688		-0.13
14.67	1382	20273.9	0.054506		-0.14
14.66	520	7623.2	0.0205088		-0.15
14.65	754	11046.1	0.0297377		-0.16
14.64	0	0	0		-0.17
14.63	0	0	0		-0.18
14.62	10	146.2	0.0003944		-0.19
14.61	300	4383	0.011832		-0.2
14.6	4	58.4	0.00015776		-0.21
	25355	14.8054
