# Supplementary material for: Interaction Wave Functions and Interaction-Based Coherence and Entanglement in Complex Adaptive Systems
Source: Research Square preprint supplement (doi:10.21203/rs.3.rs-6846233/v1), 2025-06-16
Supplement: Supplementary file 272 [file 30627.xls]

## Sheet: Sheet1
15.5	500	7750	0.0480215		0.41
15.49	0	0	0		0.4
15.48	0	0	0		0.39
15.47	0	0	0		0.38
15.46	0	0	0		0.37
15.45	0	0	0		0.36
15.44	0	0	0		0.35
15.43	0	0	0		0.34
15.42	0	0	0		0.33
15.41	0	0	0		0.32
15.4	0	0	0		0.31
15.39	0	0	0		0.3
15.38	0	0	0		0.29
15.37	0	0	0		0.28
15.36	0	0	0		0.27
15.35	0	0	0		0.26
15.34	0	0	0		0.25
15.33	0	0	0		0.24
15.32	0	0	0		0.23
15.31	0	0	0		0.22
15.3	0	0	0		0.21
15.29	0	0	0		0.2
15.28	0	0	0		0.19
15.27	0	0	0		0.18
15.26	0	0	0		0.17
15.25	0	0	0		0.16
15.24	66	1005.84	0.00633884		0.15
15.23	586	8924.78	0.0562812		0.14
15.22	231	3515.82	0.0221859		0.13
15.21	801	12183.2	0.0769305		0.12
15.2	1538	23377.6	0.147714		0.11
15.19	720	10936.8	0.069151		0.1
15.18	297	4508.46	0.0285248		0.09
15.17	123	1865.91	0.0118133		0.08
15.16	65	985.4	0.0062428		0.07
15.15	39	590.85	0.00374568		0.06
15.14	27	408.78	0.00259316		0.05
15.13	164	2481.32	0.0157511		0.04
15.12	20	302.4	0.00192086		0.03
15.11	46	695.06	0.00441798		0.02
15.1	450	6795	0.0432194		0.01
15.09	135	2037.15	0.0129658		0
15.08	246	3709.68	0.0236266		-0.01
15.07	0	0	0		-0.02
15.06	117	1762.02	0.011237		-0.03
15.05	0	0	0		-0.04
15.04	0	0	0		-0.05
15.03	0	0	0		-0.06
15.02	0	0	0		-0.07
15.01	5	75.05	0.000480215		-0.08
15	424	6360	0.0407222		-0.09
14.99	0	0	0		-0.1
14.98	108	1617.84	0.0103726		-0.11
14.97	0	0	0		-0.12
14.96	0	0	0		-0.13
14.95	90	1345.5	0.00864387		-0.14
14.94	4	59.76	0.000384172		-0.15
14.93	322	4807.46	0.0309259		-0.16
14.92	393	5863.56	0.0377449		-0.17
14.91	64	954.24	0.00614675		-0.18
14.9	2376	35402.4	0.228198		-0.19
14.89	23	342.47	0.00220899		-0.2
14.88	292	4344.96	0.0280446		-0.21
14.87	35	520.45	0.00336151		-0.22
14.86	5	74.3	0.000480215		-0.23
14.85	100	1485	0.0096043		-0.24
	10412	15.0873
