# Supplementary material for: Interaction Wave Functions and Interaction-Based Coherence and Entanglement in Complex Adaptive Systems
Source: Research Square preprint supplement (doi:10.21203/rs.3.rs-6846233/v1), 2025-06-16
Supplement: Supplementary file 273 [file 30630.xls]

## Sheet: Sheet1
15.2	202	3070.4	0.0119069		0.32
15.19	0	0	0		0.31
15.18	0	0	0		0.3
15.17	0	0	0		0.29
15.16	0	0	0		0.28
15.15	0	0	0		0.27
15.14	0	0	0		0.26
15.13	0	0	0		0.25
15.12	0	0	0		0.24
15.11	0	0	0		0.23
15.1	44	664.4	0.00259358		0.22
15.09	78	1177.02	0.0045977		0.21
15.08	0	0	0		0.2
15.07	0	0	0		0.19
15.06	0	0	0		0.18
15.05	21	316.05	0.00123784		0.17
15.04	66	992.64	0.00389036		0.16
15.03	7	105.21	0.000412614		0.15
15.02	76	1141.52	0.00447981		0.14
15.01	37	555.37	0.00218096		0.13
15	594	8910	0.0350133		0.12
14.99	49	734.51	0.0028883		0.11
14.98	253	3789.94	0.0149131		0.1
14.97	76	1137.72	0.00447981		0.09
14.96	95	1421.2	0.00559976		0.08
14.95	584	8730.8	0.0344238		0.07
14.94	22	328.68	0.00129679		0.06
14.93	60	895.8	0.00353669		0.05
14.92	307	4580.44	0.0180961		0.04
14.91	566	8439.06	0.0333628		0.03
14.9	4777	71177.3	0.28158		0.02
14.89	270	4020.3	0.0159151		0.01
14.88	1027	15281.8	0.0605364		0
14.87	1033	15360.7	0.0608901		-0.01
14.86	900	13374	0.0530504		-0.02
14.85	624	9266.4	0.0367816		-0.03
14.84	0	0	0		-0.04
14.83	3291	48805.5	0.193988		-0.05
14.82	0	0	0		-0.06
14.81	1506	22303.9	0.088771		-0.07
14.8	400	5920	0.023578		-0.08
	16965	14.8836
