# Supplementary material for: Interaction Wave Functions and Interaction-Based Coherence and Entanglement in Complex Adaptive Systems
Source: Research Square preprint supplement (doi:10.21203/rs.3.rs-6846233/v1), 2025-06-16
Supplement: Supplementary file 274 [file 30602-06.xls]

## Sheet: Sheet1
0.19		1508				1508	286.52	0.00226902
0.18		2429				2429	437.22	0.0036548
0.17	219	1580				1799	305.83	0.00270687
0.16	1251	1868	1454		711	5284	845.44	0.00795059
0.15	3121	2223	4930	216	845	11335	1700.25	0.0170552
0.14	1547	3983	9641	3646	2464	21281	2979.34	0.0320205
0.13	1253	4598	4532	965	531	11879	1544.27	0.0178738
0.12	275	2476	1177	1702	2478	8108	972.96	0.0121997
0.11	1795	3708	1805	4596	3540	15444	1698.84	0.0232379
0.1	1229	2306	1551	2633	4531	12250	1225	0.018432
0.09	913	13185	6390	1780	3450	25718	2314.62	0.0386967
0.08	4826	3417	2952	525	3806	15526	1242.08	0.0233612
0.07	5396	3000	2449	392	2389	13626	953.82	0.0205024
0.06	14791	4153	1264	2023	7250	29481	1768.86	0.0443587
0.05	4878	2507	1007	1771	2442	12605	630.25	0.0189662
0.04	6415	2864	4509	3439	3645	20872	834.88	0.0314051
0.03	5695	1558	2617	3080	5553	18503	555.09	0.0278406
0.02	7890	1990	3910	1506	2968	18264	365.28	0.027481
0.01	9505	682	2874	5881	11101	30043	300.43	0.0452043
-3.1225e-17	9056	758	1491	2805	15056	29166	-9.10709e-13	0.0438847
-0.01	12430	1020	5608	2559	8398	30015	-300.15	0.0451622
-0.02	15095	1143	2859	1587	14553	35237	-704.74	0.0530195
-0.03	17946	2940	2948	1314	33318	58466	-1753.98	0.0879711
-0.04	15186	2241	2814	3571	42817	66629	-2665.16	0.100254
-0.05	6643	5910	1900	2447	7224	24124	-1206.2	0.0362983
-0.06	9636	7991	9879	1989	616	30111	-1806.66	0.0453066
-0.07	1700	0	3635	1952		7287	-510.09	0.0109644
-0.08	5224	2681	3558	3331		14794	-1183.52	0.0222598
-0.09	5401	9801	4044	11266		30512	-2746.08	0.04591
-0.1		8097	4187	2200		14484	-1448.4	0.0217934
-0.11		12370	13087	528		25985	-2858.35	0.0390984
-0.12		1696	1144	439		3279	-393.48	0.00493376
-0.13		80	2808	427		3315	-430.95	0.00498793
-0.14		956	1561			2517	-352.38	0.00378721
-0.15		0				0	0	0
-0.16		12729				12729	-2036.64	0.0191527
						664605	0.000848925
