# Supplementary material for: Interaction Wave Functions and Interaction-Based Coherence and Entanglement in Complex Adaptive Systems
Source: Research Square preprint supplement (doi:10.21203/rs.3.rs-6846233/v1), 2025-06-16
Supplement: Supplementary file 275 [file 30602.xls]

## Sheet: Sheet1
11.31	219	2476.89	0.00129344		0.17
11.3	1251	14136.3	0.00738855		0.16
11.29	3121	35236.1	0.018433		0.15
11.28	1547	17450.2	0.00913676		0.14
11.27	1253	14121.3	0.00740036		0.13
11.26	275	3096.5	0.00162418		0.12
11.25	1795	20193.8	0.0106015		0.11
11.24	1229	13814	0.00725862		0.1
11.23	913	10253	0.00539228		0.09
11.22	4826	54147.7	0.0285029		0.08
11.21	5396	60489.2	0.0318694		0.07
11.2	14791	165659	0.0873574		0.06
11.19	4878	54584.8	0.02881		0.05
11.18	6415	71719.7	0.0378877		0.04
11.17	5695	63613.2	0.0336353		0.03
11.16	7890	88052.4	0.0465993		0.02
11.15	9505	105981	0.0561376		0.01
11.14	9056	100884	0.0534858		0
11.13	12430	138346	0.073413		-0.01
11.12	15095	167856	0.0891528		-0.02
11.11	17946	199380	0.105991		-0.03
11.1	15186	168565	0.0896903		-0.04
11.09	6643	73670.9	0.0392343		-0.05
11.08	9636	106767	0.0569113		-0.06
11.07	1700	18819	0.0100404		-0.07
11.06	5224	57777.4	0.0308536		-0.08
11.05	5401	59681.1	0.0318989		-0.09
	169316	11.1435
