# Supplementary material for: Interaction Wave Functions and Interaction-Based Coherence and Entanglement in Complex Adaptive Systems
Source: Research Square preprint supplement (doi:10.21203/rs.3.rs-6846233/v1), 2025-06-16
Supplement: Supplementary file 276 [file 30603.xls]

## Sheet: Sheet1
11.45	1508	17266.6	0.0115602		0.19
11.44	2429	27787.8	0.0186204		0.18
11.43	1580	18059.4	0.0121121		0.17
11.42	1868	21332.6	0.0143199		0.16
11.41	2223	25364.4	0.0170413		0.15
11.4	3983	45406.2	0.0305332		0.14
11.39	4598	52371.2	0.0352478		0.13
11.38	2476	28176.9	0.0189807		0.12
11.37	3708	42160	0.0284251		0.11
11.36	2306	26196.2	0.0176775		0.1
11.35	13185	149650	0.101075		0.09
11.34	3417	38748.8	0.0261943		0.08
11.33	3000	33990	0.0229977		0.07
11.32	4153	47012	0.0318364		0.06
11.31	2507	28354.2	0.0192184		0.05
11.3	2864	32363.2	0.0219551		0.04
11.29	1558	17589.8	0.0119435		0.03
11.28	1990	22447.2	0.0152551		0.02
11.27	682	7686.14	0.00522814		0.01
11.26	758	8535.08	0.00581074		0
11.25	1020	11475	0.00781921		-0.01
11.24	1143	12847.3	0.00876211		-0.02
11.23	2940	33016.2	0.0225377		-0.03
11.22	2241	25144	0.0171793		-0.04
11.21	5910	66251.1	0.0453054		-0.05
11.2	7991	89499.2	0.0612581		-0.06
11.19	0	0	0		-0.07
11.18	2681	29973.6	0.0205523		-0.08
11.17	9801	109477	0.0751334		-0.09
11.16	8097	90362.5	0.0620707		-0.1
11.15	12370	137926	0.0948271		-0.11
11.14	1696	18893.4	0.0130013		-0.12
11.13	80	890.4	0.000613271		-0.13
11.12	956	10630.7	0.00732859		-0.14
11.11	0	0	0		-0.15
11.1	12729	141292	0.0975791		-0.16
	130448	11.2549
