# Supplementary material for: Interaction Wave Functions and Interaction-Based Coherence and Entanglement in Complex Adaptive Systems
Source: Research Square preprint supplement (doi:10.21203/rs.3.rs-6846233/v1), 2025-06-16
Supplement: Supplementary file 277 [file 30604.xls]

## Sheet: Sheet1
11.37	1454	16532	0.0126893		0.16
11.36	4930	56004.8	0.0430248		0.15
11.35	9641	109425	0.0841384		0.14
11.34	4532	51392.9	0.0395514		0.13
11.33	1177	13335.4	0.0102719		0.12
11.32	1805	20432.6	0.0157525		0.11
11.31	1551	17541.8	0.0135358		0.1
11.3	6390	72207	0.0557665		0.09
11.29	2952	33328.1	0.0257625		0.08
11.28	2449	27624.7	0.0213728		0.07
11.27	1264	14245.3	0.0110311		0.06
11.26	1007	11338.8	0.00878824		0.05
11.25	4509	50726.3	0.0393507		0.04
11.24	2617	29415.1	0.0228389		0.03
11.23	3910	43909.3	0.0341231		0.02
11.22	2874	32246.3	0.0250818		0.01
11.21	1491	16714.1	0.0130122		0
11.2	5608	62809.6	0.0489418		-0.01
11.19	2859	31992.2	0.0249509		-0.02
11.18	2948	32958.6	0.0257276		-0.03
11.17	2814	31432.4	0.0245582		-0.04
11.16	1900	21204	0.0165816		-0.05
11.15	9879	110151	0.0862155		-0.06
11.14	3635	40493.9	0.0317232		-0.07
11.13	3558	39600.5	0.0310512		-0.08
11.12	4044	44969.3	0.0352926		-0.09
11.11	4187	46517.6	0.0365406		-0.1
11.1	13087	145266	0.114212		-0.11
11.09	1144	12687	0.00998385		-0.12
11.08	2808	31112.6	0.0245058		-0.13
11.07	1561	17280.3	0.0136231		-0.14
	114585	11.2135
