# Supplementary material for: Interaction Wave Functions and Interaction-Based Coherence and Entanglement in Complex Adaptive Systems
Source: Research Square preprint supplement (doi:10.21203/rs.3.rs-6846233/v1), 2025-06-16
Supplement: Supplementary file 278 [file 30605.xls]

## Sheet: Sheet1
11.44	216	2471.04	0.00306079		0.15
11.43	3646	41673.8	0.051665		0.14
11.42	965	11020.3	0.0136744		0.13
11.41	1702	19419.8	0.0241179		0.12
11.4	4596	52394.4	0.0651268		0.11
11.39	2633	29989.9	0.0373105		0.1
11.38	1780	20256.4	0.0252232		0.09
11.37	525	5969.25	0.00743942		0.08
11.36	392	4453.12	0.00555477		0.07
11.35	2023	22961.1	0.0286666		0.06
11.34	1771	20083.1	0.0250956		0.05
11.33	3439	38963.9	0.0487318		0.04
11.32	3080	34865.6	0.0436446		0.03
11.31	1506	17032.9	0.0213405		0.02
11.3	5881	66455.3	0.0833357		0.01
11.29	2805	31668.5	0.0397478		0
11.28	2559	28865.5	0.0362619		-0.01
11.27	1587	17885.5	0.0224883		-0.02
11.26	1314	14795.6	0.0186198		-0.03
11.25	3571	40173.8	0.0506022		-0.04
11.24	2447	27504.3	0.0346748		-0.05
11.23	1989	22336.5	0.0281848		-0.06
11.22	1952	21901.4	0.0276605		-0.07
11.21	3331	37340.5	0.0472014		-0.08
11.2	11266	126179	0.159643		-0.09
11.19	2200	24618	0.0311747		-0.1
11.18	528	5903.04	0.00748193		-0.11
11.17	439	4903.63	0.00622077		-0.12
11.16	427	4765.32	0.00605073		-0.13
	70570	11.2916
