# Supplementary material for: Interaction Wave Functions and Interaction-Based Coherence and Entanglement in Complex Adaptive Systems
Source: Research Square preprint supplement (doi:10.21203/rs.3.rs-6846233/v1), 2025-06-16
Supplement: Supplementary file 279 [file 30606.xls]

## Sheet: Sheet1
11.2	711	7963.2	0.0039569		0.16
11.19	845	9455.55	0.00470265		0.15
11.18	2464	27547.5	0.0137128		0.14
11.17	531	5931.27	0.00295516		0.13
11.16	2478	27654.5	0.0137907		0.12
11.15	3540	39471	0.019701		0.11
11.14	4531	50475.3	0.0252162		0.1
11.13	3450	38398.5	0.0192002		0.09
11.12	3806	42322.7	0.0211814		0.08
11.11	2389	26541.8	0.0132954		0.07
11.1	7250	80475	0.0403482		0.06
11.09	2442	27081.8	0.0135904		0.05
11.08	3645	40386.6	0.0202854		0.04
11.07	5553	61471.7	0.0309039		0.03
11.06	2968	32826.1	0.0165177		0.02
11.05	11101	122666	0.06178		0.01
11.04	15056	166218	0.0837906		0
11.03	8398	92629.9	0.0467371		-0.01
11.02	14553	160374	0.0809913		-0.02
11.01	33318	366831	0.185423		-0.03
11	42817	470987	0.238288		-0.04
10.99	7224	79391.8	0.0402035		-0.05
10.98	616	6763.68	0.0034282		-0.06
	179686	11.0407
