# Supplementary material for: Interaction Wave Functions and Interaction-Based Coherence and Entanglement in Complex Adaptive Systems
Source: Research Square preprint supplement (doi:10.21203/rs.3.rs-6846233/v1), 2025-06-16
Supplement: Supplementary file 280 [file 30609-13.xls]

## Sheet: Sheet1
0.18	81					81	14.58	0.000197037
0.17	1268					1268	215.56	0.00308448
0.16	974					974	155.84	0.00236931
0.15	2646					2646	396.9	0.00643653
0.14	843					843	118.02	0.00205064
0.13	7033					7033	914.29	0.0171081
0.12	1811			738		2549	305.88	0.00620057
0.11	2276			1892		4168	458.48	0.0101389
0.1	2273	273	1497	553	1142	5738	573.8	0.013958
0.09	3602	978	3868	706	1707	10861	977.49	0.0264199
0.08	5570	1036	7842	1214	2302	17964	1437.12	0.0436984
0.07	4219	667	4013	991	734	10624	743.68	0.0258434
0.06	3848	811	4830	627	3266	13382	802.92	0.0325524
0.05	2068	4792	10683	1223	2284	21050	1052.5	0.0512052
0.04	3952	2774	7400	2084	5426	21636	865.44	0.0526307
0.03	8336	4182	7336	6418	2959	29231	876.93	0.0711059
0.02	5107	4782	5892	4280	1272	21333	426.66	0.0518936
0.01	6000	5930	5456	1981	734	20101	201.01	0.0488967
-3.1225e-17	3202	10015	7410	2084	2668	25379	-7.9246e-13	0.0617357
-0.01	8609	6889	3793	1914	3491	24696	-246.96	0.0600743
-0.02	6541	11021	565	4426	10343	32896	-657.92	0.0800212
-0.03	1620	4538	1708	7301	4212	19379	-581.37	0.0471404
-0.04	1591	4527	1675	11281	7327	26401	-1056.04	0.0642218
-0.05	3902	2810	3838	5222	3075	18847	-942.35	0.0458463
-0.06	6661	1174	2143	1113	4451	15542	-932.52	0.0378067
-0.07	11896	18	1036	1204	999	15153	-1060.71	0.0368605
-0.08	5493		744			6237	-498.96	0.0151718
-0.09	6280		208			6488	-583.92	0.0157824
-0.1	4345		984			5329	-532.9	0.0129631
-0.11	824		2039			2863	-314.93	0.00696439
-0.12	4384		843			5227	-627.24	0.0127149
-0.13	2845		636			3481	-452.53	0.00846771
-0.14	2920		2277			5197	-727.58	0.012642
-0.15			3407			3407	-511.05	0.0082877
-0.16			1498			1498	-239.68	0.00364396
-0.17			1541			1541	-261.97	0.00374856
-0.18			48			48	-8.64	0.000116762
						411091	0.000729352
