# Supplementary material for: Interaction Wave Functions and Interaction-Based Coherence and Entanglement in Complex Adaptive Systems
Source: Research Square preprint supplement (doi:10.21203/rs.3.rs-6846233/v1), 2025-06-16
Supplement: Supplementary file 281 [file 30609.xls]

## Sheet: Sheet1
10.95	81	886.95	0.000608931		0.18
10.94	1268	13871.9	0.0095324		0.17
10.93	974	10645.8	0.00732221		0.16
10.92	2646	28894.3	0.0198917		0.15
10.91	843	9197.13	0.00633739		0.14
10.9	7033	76659.7	0.0528717		0.13
10.89	1811	19721.8	0.0136145		0.12
10.88	2276	24762.9	0.0171102		0.11
10.87	2273	24707.5	0.0170877		0.1
10.86	3602	39117.7	0.0270786		0.09
10.85	5570	60434.5	0.0418734		0.08
10.84	4219	45734	0.031717		0.07
10.83	3848	41673.8	0.028928		0.06
10.82	2068	22375.8	0.0155465		0.05
10.81	3952	42721.1	0.0297098		0.04
10.8	8336	90028.8	0.0626673		0.03
10.79	5107	55104.5	0.0383927		0.02
10.78	6000	64680	0.045106		0.01
10.77	3202	34485.5	0.0240716		0
10.76	8609	92632.8	0.0647196		-0.01
10.75	6541	70315.8	0.0491731		-0.02
10.74	1620	17398.8	0.0121786		-0.03
10.73	1591	17071.4	0.0119606		-0.04
10.72	3902	41829.4	0.0293339		-0.05
10.71	6661	71339.3	0.0500752		-0.06
10.7	11896	127287	0.0894302		-0.07
10.69	5493	58720.2	0.0412945		-0.08
10.68	6280	67070.4	0.0472109		-0.09
10.67	4345	46361.2	0.0326643		-0.1
10.66	824	8783.84	0.00619456		-0.11
10.65	4384	46689.6	0.0329575		-0.12
10.64	2845	30270.8	0.0213878		-0.13
10.63	2920	31039.6	0.0219516		-0.14
	133020	10.7692
