# Supplementary material for: Interaction Wave Functions and Interaction-Based Coherence and Entanglement in Complex Adaptive Systems
Source: Research Square preprint supplement (doi:10.21203/rs.3.rs-6846233/v1), 2025-06-16
Supplement: Supplementary file 282 [file 30610.xls]

## Sheet: Sheet1
10.8	273	2948.4	0.00406147		0.1
10.79	978	10552.6	0.0145499		0.09
10.78	1036	11168.1	0.0154128		0.08
10.77	667	7183.59	0.00992308		0.07
10.76	811	8726.36	0.0120654		0.06
10.75	4792	51514	0.0712915		0.05
10.74	2774	29792.8	0.0412693		0.04
10.73	4182	44872.9	0.0622164		0.03
10.72	4782	51263	0.0711427		0.02
10.71	5930	63510.3	0.0882217		0.01
10.7	10015	107161	0.148995		0
10.69	6889	73643.4	0.102489		-0.01
10.68	11021	117704	0.163961		-0.02
10.67	4538	48420.5	0.0675127		-0.03
10.66	4527	48257.8	0.067349		-0.04
10.65	2810	29926.5	0.0418049		-0.05
10.64	1174	12491.4	0.0174658		-0.06
10.63	18	191.34	0.000267789		-0.07
	67217	10.7016
