# Supplementary material for: Interaction Wave Functions and Interaction-Based Coherence and Entanglement in Complex Adaptive Systems
Source: Research Square preprint supplement (doi:10.21203/rs.3.rs-6846233/v1), 2025-06-16
Supplement: Supplementary file 283 [file 30611.xls]

## Sheet: Sheet1
10.95	1497	16392.1	0.0157231		0.1
10.94	3868	42315.9	0.040626		0.09
10.93	7842	85713.1	0.0823653		0.08
10.92	4013	43822	0.0421489		0.07
10.91	4830	52695.3	0.05073		0.06
10.9	10683	116445	0.112205		0.05
10.89	7400	80586	0.0777229		0.04
10.88	7336	79815.7	0.0770507		0.03
10.87	5892	64046	0.0618843		0.02
10.86	5456	59252.2	0.0573049		0.01
10.85	7410	80398.5	0.077828		0
10.84	3793	41116.1	0.0398383		-0.01
10.83	565	6118.95	0.00593425		-0.02
10.82	1708	18480.6	0.0179393		-0.03
10.81	1675	18106.8	0.0175927		-0.04
10.8	3838	41450.4	0.0403109		-0.05
10.79	2143	23123	0.0225081		-0.06
10.78	1036	11168.1	0.0108812		-0.07
10.77	744	8012.88	0.00781431		-0.08
10.76	208	2238.08	0.00218464		-0.09
10.75	984	10578	0.010335		-0.1
10.74	2039	21898.9	0.0214158		-0.11
10.73	843	9045.39	0.00885411		-0.12
10.72	636	6817.92	0.00667997		-0.13
10.71	2277	24386.7	0.0239156		-0.14
10.7	3407	36454.9	0.0357841		-0.15
10.69	1498	16013.6	0.0157336		-0.16
10.68	1541	16457.9	0.0161853		-0.17
10.67	48	512.16	0.000504149		-0.18
	95210	10.8545
