# Supplementary material for: Interaction Wave Functions and Interaction-Based Coherence and Entanglement in Complex Adaptive Systems
Source: Research Square preprint supplement (doi:10.21203/rs.3.rs-6846233/v1), 2025-06-16
Supplement: Supplementary file 284 [file 30612.xls]

## Sheet: Sheet1
10.99	738	8110.62	0.0128904		0.12
10.98	1892	20774.2	0.0330469		0.11
10.97	553	6066.41	0.00965905		0.1
10.96	706	7737.76	0.0123314		0.09
10.95	1214	13293.3	0.0212045		0.08
10.94	991	10841.5	0.0173094		0.07
10.93	627	6853.11	0.0109516		0.06
10.92	1223	13355.2	0.0213617		0.05
10.91	2084	22736.4	0.0364005		0.04
10.9	6418	69956.2	0.112101		0.03
10.89	4280	46609.2	0.0747572		0.02
10.88	1981	21553.3	0.0346014		0.01
10.87	2084	22653.1	0.0364005		0
10.86	1914	20786	0.0334311		-0.01
10.85	4426	48022.1	0.0773073		-0.02
10.84	7301	79142.8	0.127524		-0.03
10.83	11281	122173	0.197041		-0.04
10.82	5222	56502	0.0912108		-0.05
10.81	1113	12031.5	0.0194404		-0.06
10.8	1204	13003.2	0.0210298		-0.07
	57252	10.8678
