# Supplementary material for: Interaction Wave Functions and Interaction-Based Coherence and Entanglement in Complex Adaptive Systems
Source: Research Square preprint supplement (doi:10.21203/rs.3.rs-6846233/v1), 2025-06-16
Supplement: Supplementary file 285 [file 30613.xls]

## Sheet: Sheet1
11.02	1142	12584.8	0.0195575		0.1
11.01	1707	18794.1	0.0292335		0.09
11	2302	25322	0.0394232		0.08
10.99	734	8066.66	0.0125702		0.07
10.98	3266	35860.7	0.0559323		0.06
10.97	2284	25055.5	0.0391149		0.05
10.96	5426	59469	0.0929237		0.04
10.95	2959	32401.1	0.0506747		0.03
10.94	1272	13915.7	0.0217838		0.02
10.93	734	8022.62	0.0125702		0.01
10.92	2668	29134.6	0.0456912		0
10.91	3491	38086.8	0.0597856		-0.01
10.9	10343	112739	0.17713		-0.02
10.89	4212	45868.7	0.0721332		-0.03
10.88	7327	79717.8	0.12548		-0.04
10.87	3075	33425.3	0.0526613		-0.05
10.86	4451	48337.9	0.0762262		-0.06
10.85	999	10839.2	0.0171085		-0.07
	58392	10.92
