# Supplementary material for: Interaction Wave Functions and Interaction-Based Coherence and Entanglement in Complex Adaptive Systems
Source: Research Square preprint supplement (doi:10.21203/rs.3.rs-6846233/v1), 2025-06-16
Supplement: Supplementary file 286 [file 30616-20.xls]

## Sheet: Sheet1
0.16				449	10	459	73.44	0.00133268
0.15		50		441	14	505	75.75	0.00146624
0.14		332		1073	3	1408	197.12	0.00408804
0.13		1224		518	1379	3121	405.73	0.00906164
0.12		453	110	699	507	1769	212.28	0.00513619
0.11		367	1694	1415	2121	5597	615.67	0.0162506
0.1		3109	475	422	1397	5403	540.3	0.0156873
0.09		2713	680	836	787	5016	451.44	0.0145637
0.08		9667	412	1487	4718	16284	1302.72	0.0472796
0.07		3149	5607	1351	1812	11919	834.33	0.0346061
0.06		4755	2361	2693	2469	12278	736.68	0.0356484
0.05		1023	1512	1706	884	5125	256.25	0.0148801
0.04		3799	2503	2050	1943	10295	411.8	0.0298909
0.03		11284	3547	2987	3903	21721	651.63	0.0630656
0.02		5917	7295	2747	3415	19374	387.48	0.0562513
0.01		8892	3417	3508	3723	19540	195.4	0.0567332
0		12595	7048	3615	7371	30629	0	0.0889295
-0.01		6349	3407	2642	3657	16055	-160.55	0.0466147
-0.02		20872	3020	2875	5769	32536	-650.72	0.0944663
-0.03		6211	19799	1703	4694	32407	-972.21	0.0940918
-0.04		10919	2746	9772	5619	29056	-1162.24	0.0843624
-0.05		2395	3007	1606	472	7480	-374	0.0217177
-0.06		10205	1004	4782	3212	19203	-1152.18	0.0557548
-0.07		11620	1000	3110	3761	19491	-1364.37	0.056591
-0.08		91		642	965	1698	-135.84	0.00493004
-0.09		1496		3643	1089	6228	-560.52	0.0180826
-0.1				1522	3098	4620	-462	0.0134139
-0.11				449	2557	3006	-330.66	0.00872774
-0.12				232	1964	2196	-263.52	0.00637595
						344419	-0.000699119
