# Supplementary material for: Interaction Wave Functions and Interaction-Based Coherence and Entanglement in Complex Adaptive Systems
Source: Research Square preprint supplement (doi:10.21203/rs.3.rs-6846233/v1), 2025-06-16
Supplement: Supplementary file 288 [file 30617.xls]

## Sheet: Sheet1
10.77	50	538.5	0.000358456		0.15
10.76	332	3572.32	0.00238015		0.14
10.75	1224	13158	0.00877501		0.13
10.74	453	4865.22	0.00324761		0.12
10.73	367	3937.91	0.00263107		0.11
10.72	3109	33328.5	0.0222888		0.1
10.71	2713	29056.2	0.0194498		0.09
10.7	9667	103437	0.0693039		0.08
10.69	3149	33662.8	0.0225756		0.07
10.68	4755	50783.4	0.0340892		0.06
10.67	1023	10915.4	0.00733402		0.05
10.66	3799	40497.3	0.0272355		0.04
10.65	11284	120175	0.0808964		0.03
10.64	5917	62956.9	0.0424197		0.02
10.63	8892	94522	0.0637479		0.01
10.62	12595	133759	0.0902952		0
10.61	6349	67362.9	0.0455168		-0.01
10.6	20872	221243	0.149634		-0.02
10.59	6211	65774.5	0.0445274		-0.03
10.58	10919	115523	0.0782797		-0.04
10.57	2395	25315.2	0.0171701		-0.05
10.56	10205	107765	0.0731609		-0.06
10.55	11620	122591	0.0833053		-0.07
10.54	91	959.14	0.000652391		-0.08
10.53	1496	15752.9	0.010725		-0.09
	139487	10.6207
