# Supplementary material for: Interaction Wave Functions and Interaction-Based Coherence and Entanglement in Complex Adaptive Systems
Source: Research Square preprint supplement (doi:10.21203/rs.3.rs-6846233/v1), 2025-06-16
Supplement: Supplementary file 289 [file 30618.xls]

## Sheet: Sheet1
10.75	110	1182.5	0.0015571		0.12
10.74	1694	18193.6	0.0239794		0.11
10.73	475	5096.75	0.00672385		0.1
10.72	680	7289.6	0.00962573		0.09
10.71	412	4412.52	0.00583206		0.08
10.7	5607	59994.9	0.0793698		0.07
10.69	2361	25239.1	0.0334211		0.06
10.68	1512	16148.2	0.0214031		0.05
10.67	2503	26707	0.0354312		0.04
10.66	3547	37811	0.0502095		0.03
10.65	7295	77691.8	0.103264		0.02
10.64	3417	36356.9	0.0483693		0.01
10.63	7048	74920.2	0.0997679		0
10.62	3407	36182.3	0.0482277		-0.01
10.61	3020	32042.2	0.0427496		-0.02
10.6	19799	209869	0.280264		-0.03
10.59	2746	29080.1	0.038871		-0.04
10.58	3007	31814.1	0.0425655		-0.05
10.57	1004	10612.3	0.0142121		-0.06
10.56	1000	10560	0.0141555		-0.07
	70644	10.6337
