# Supplementary material for: Interaction Wave Functions and Interaction-Based Coherence and Entanglement in Complex Adaptive Systems
Source: Research Square preprint supplement (doi:10.21203/rs.3.rs-6846233/v1), 2025-06-16
Supplement: Supplementary file 290 [file 30619.xls]

## Sheet: Sheet1
10.7	449	4804.3	0.00736367		0.16
10.69	441	4714.29	0.00723247		0.15
10.68	1073	11459.6	0.0175974		0.14
10.67	518	5527.06	0.00849528		0.13
10.66	699	7451.34	0.0114637		0.12
10.65	1415	15069.8	0.0232062		0.11
10.64	422	4490.08	0.00692087		0.1
10.63	836	8886.68	0.0137105		0.09
10.62	1487	15791.9	0.024387		0.08
10.61	1351	14334.1	0.0221566		0.07
10.6	2693	28545.8	0.0441656		0.06
10.59	1706	18066.5	0.0279787		0.05
10.58	2050	21689	0.0336203		0.04
10.57	2987	31572.6	0.0489873		0.03
10.56	2747	29008.3	0.0450513		0.02
10.55	3508	37009.4	0.0575318		0.01
10.54	3615	38102.1	0.0592866		0
10.53	2642	27820.3	0.0433292		-0.01
10.52	2875	30245	0.0471505		-0.02
10.51	1703	17898.5	0.0279295		-0.03
10.5	9772	102606	0.160262		-0.04
10.49	1606	16846.9	0.0263387		-0.05
10.48	4782	50115.4	0.0784256		-0.06
10.47	3110	32561.7	0.0510045		-0.07
10.46	642	6715.32	0.0105289		-0.08
10.45	3643	38069.4	0.0597458		-0.09
10.44	1522	15889.7	0.024961		-0.1
10.43	449	4683.07	0.00736367		-0.11
10.42	232	2417.44	0.00380484		-0.12
	60975	10.5353
