# Supplementary material for: Interaction Wave Functions and Interaction-Based Coherence and Entanglement in Complex Adaptive Systems
Source: Research Square preprint supplement (doi:10.21203/rs.3.rs-6846233/v1), 2025-06-16
Supplement: Supplementary file 291 [file 30620.xls]

## Sheet: Sheet1
10.58	10	105.8	0.000136401		0.16
10.57	14	147.98	0.000190962		0.15
10.56	3	31.68	4.09204e-05		0.14
10.55	1379	14548.5	0.0188098		0.13
10.54	507	5343.78	0.00691555		0.12
10.53	2121	22334.1	0.0289307		0.11
10.52	1397	14696.4	0.0190553		0.1
10.51	787	8271.37	0.0107348		0.09
10.5	4718	49539	0.0643542		0.08
10.49	1812	19007.9	0.0247159		0.07
10.48	2469	25875.1	0.0336775		0.06
10.47	884	9255.48	0.0120579		0.05
10.46	1943	20323.8	0.0265028		0.04
10.45	3903	40786.4	0.0532375		0.03
10.44	3415	35652.6	0.0465811		0.02
10.43	3723	38830.9	0.0507823		0.01
10.42	7371	76805.8	0.100542		0
10.41	3657	38069.4	0.049882		-0.01
10.4	5769	59997.6	0.07869		-0.02
10.39	4694	48770.7	0.0640268		-0.03
10.38	5619	58325.2	0.076644		-0.04
10.37	472	4894.64	0.00643815		-0.05
10.36	3212	33276.3	0.0438121		-0.06
10.35	3761	38926.4	0.0513006		-0.07
10.34	965	9978.1	0.0131627		-0.08
10.33	1089	11249.4	0.0148541		-0.09
10.32	3098	31971.4	0.0422572		-0.1
10.31	2557	26362.7	0.0348779		-0.11
10.3	1964	20229.2	0.0267892		-0.12
	73313	10.4157
