# Supplementary material for: Interaction Wave Functions and Interaction-Based Coherence and Entanglement in Complex Adaptive Systems
Source: Research Square preprint supplement (doi:10.21203/rs.3.rs-6846233/v1), 2025-06-16
Supplement: Supplementary file 292 [file 30623-27.xls]

## Sheet: Sheet1
0.21				480		480		0.00140935
0.2				2333		2333		0.00685004
0.19				1892		1892		0.0055552
0.18				2026		2026		0.00594864
0.17				631		631		0.00185271
0.16				578		578		0.00169709
0.15				3555	386	3941		0.0115714
0.14				2961	26	2987		0.00877028
0.13				4374	363	4737		0.0139085
0.12	216			2331	1138	3685		0.0108197
0.11	0			2584	1171	3755		0.0110252
0.1	0			3501	2321	5822		0.0170943
0.09	0		10	1499	1248	2757		0.00809497
0.08	240		398	7831	2825	11294		0.0331609
0.07	1662	4257	816	3229	1790	11754		0.0345115
0.06	2528	1461	588	3108	1711	9396		0.0275881
0.05	3415	2128	3773	443	1971	11730		0.034441
0.04	2330	4468	3378	591	1558	12325		0.0361881
0.03	10925	4612	3984	231	1185	20937		0.0614742
0.02	3804	11932	4050	284	2284	22354		0.0656347
0.01	8497	6611	4248	0	1607	20963		0.0615505
-5.89806e-17	9979	5139	3320	1537	8256	28231		0.0828905
-0.01	8400	8761	1217	0	2576	20954		0.0615241
-0.02	10785	2773	671	1548	1567	17344		0.0509246
-0.03	2613	10824	2172	2169	634	18412		0.0540604
-0.04	4445	3087	27	840	1604	10003		0.0293703
-0.05	6040	4299	4628	884	3475	19326		0.056744
-0.06	100	2914	3307	2071	5605	13997		0.0410973
-0.07		435	945	4339	6905	12624		0.037066
-0.08		2133		3283	2413	7829		0.0229871
-0.09		1503		3043	1279	5825		0.0171031
-0.1				7350		7350		0.0215807
-0.11				2691		2691		0.00790118
-0.12				7777		7777		0.0228344
-0.13				7843		7843		0.0230282
-0.14				2490		2490		0.00731101
-0.15				739		739		0.00216982
-0.16				770		770		0.00226084
						340582
