# Supplementary material for: Interaction Wave Functions and Interaction-Based Coherence and Entanglement in Complex Adaptive Systems
Source: Research Square preprint supplement (doi:10.21203/rs.3.rs-6846233/v1), 2025-06-16
Supplement: Supplementary file 293 [file 30623.xls]

## Sheet: Sheet1
10.29	216	2222.64	0.00284289		0.12
10.28	0	0	0		0.11
10.27	0	0	0		0.1
10.26	0	0	0		0.09
10.25	240	2460	0.00315877		0.08
10.24	1662	17018.9	0.0218745		0.07
10.23	2528	25861.4	0.0332724		0.06
10.22	3415	34901.3	0.0449466		0.05
10.21	2330	23789.3	0.0306664		0.04
10.2	10925	111435	0.14379		0.03
10.19	3804	38762.8	0.0500665		0.02
10.18	8497	86499.5	0.111834		0.01
10.17	9979	101486	0.131339		0
10.16	8400	85344	0.110557		-0.01
10.15	10785	109468	0.141947		-0.02
10.14	2613	26495.8	0.0343911		-0.03
10.13	4445	45027.9	0.058503		-0.04
10.12	6040	61124.8	0.0794957		-0.05
10.11	100	1011	0.00131615		-0.06
	75979	10.1727
