# Supplementary material for: Interaction Wave Functions and Interaction-Based Coherence and Entanglement in Complex Adaptive Systems
Source: Research Square preprint supplement (doi:10.21203/rs.3.rs-6846233/v1), 2025-06-16
Supplement: Supplementary file 294 [file 30624.xls]

## Sheet: Sheet1
10.2	4257	43421.4	0.0550448		0.07
10.19	1461	14887.6	0.0188913		0.06
10.18	2128	21663	0.0275159		0.05
10.17	4468	45439.6	0.0577731		0.04
10.16	4612	46857.9	0.0596351		0.03
10.15	11932	121110	0.154286		0.02
10.14	6611	67035.5	0.085483		0.01
10.13	5139	52058.1	0.0664494		0
10.12	8761	88661.3	0.113283		-0.01
10.11	2773	28035	0.0358561		-0.02
10.1	10824	109322	0.139959		-0.03
10.09	3087	31147.8	0.0399162		-0.04
10.08	4299	43333.9	0.0555879		-0.05
10.07	2914	29344	0.0376792		-0.06
10.06	435	4376.1	0.00562473		-0.07
10.05	2133	21436.7	0.0275806		-0.08
10.04	1503	15090.1	0.0194344		-0.09
	77337	10.1274
