# Supplementary material for: Interaction Wave Functions and Interaction-Based Coherence and Entanglement in Complex Adaptive Systems
Source: Research Square preprint supplement (doi:10.21203/rs.3.rs-6846233/v1), 2025-06-16
Supplement: Supplementary file 295 [file 30625.xls]

## Sheet: Sheet1
10.24	10	102.4	0.000266439		0.09
10.23	398	4071.54	0.0106043		0.08
10.22	816	8339.52	0.0217414		0.07
10.21	588	6003.48	0.0156666		0.06
10.2	3773	38484.6	0.100528		0.05
10.19	3378	34421.8	0.0900032		0.04
10.18	3984	40557.1	0.106149		0.03
10.17	4050	41188.5	0.107908		0.02
10.16	4248	43159.7	0.113183		0.01
10.15	3320	33698	0.0884578		0
10.14	1217	12340.4	0.0324257		-0.01
10.13	671	6797.23	0.0178781		-0.02
10.12	2172	21980.6	0.0578706		-0.03
10.11	27	272.97	0.000719386		-0.04
10.1	4628	46742.8	0.123308		-0.05
10.09	3307	33367.6	0.0881115		-0.06
10.08	945	9525.6	0.0251785		-0.07
	37532	10.1528
