# Supplementary material for: Interaction Wave Functions and Interaction-Based Coherence and Entanglement in Complex Adaptive Systems
Source: Research Square preprint supplement (doi:10.21203/rs.3.rs-6846233/v1), 2025-06-16
Supplement: Supplementary file 296 [file 30626.xls]

## Sheet: Sheet1
10.33	480	4958.4	0.00511531		0.21
10.32	2333	24076.6	0.0248625		0.2
10.31	1892	19506.5	0.0201628		0.19
10.3	2026	20867.8	0.0215909		0.18
10.29	631	6492.99	0.0067245		0.17
10.28	578	5941.84	0.00615968		0.16
10.27	3555	36509.9	0.0378852		0.15
10.26	2961	30379.9	0.0315551		0.14
10.25	4374	44833.5	0.0466132		0.13
10.24	2331	23869.4	0.0248412		0.12
10.23	2584	26434.3	0.0275374		0.11
10.22	3501	35780.2	0.0373098		0.1
10.21	1499	15304.8	0.0159747		0.09
10.2	7831	79876.2	0.0834541		0.08
10.19	3229	32903.5	0.0344111		0.07
10.18	3108	31639.4	0.0331216		0.06
10.17	443	4505.31	0.004721		0.05
10.16	591	6004.56	0.00629822		0.04
10.15	231	2344.65	0.00246174		0.03
10.14	284	2879.76	0.00302656		0.02
10.13	0	0	0		0.01
10.12	1537	15554.4	0.0163796		0
10.11	0	0	0		-0.01
10.1	1548	15634.8	0.0164969		-0.02
10.09	2169	21885.2	0.0231148		-0.03
10.08	840	8467.2	0.00895179		-0.04
10.07	884	8901.88	0.00942069		-0.05
10.06	2071	20834.3	0.0220704		-0.06
10.05	4339	43607	0.0462402		-0.07
10.04	3283	32961.3	0.0349866		-0.08
10.03	3043	30521.3	0.0324289		-0.09
10.02	7350	73647	0.0783281		-0.1
10.01	2691	26936.9	0.0286777		-0.11
10	7777	77770	0.0828786		-0.12
9.99	7843	78351.6	0.083582		-0.13
9.98	2490	24850.2	0.0265357		-0.14
9.97	739	7367.83	0.00787544		-0.15
9.96	770	7669.2	0.00820581		-0.16
	93836	10.1248
