# Supplementary material for: Interaction Wave Functions and Interaction-Based Coherence and Entanglement in Complex Adaptive Systems
Source: Research Square preprint supplement (doi:10.21203/rs.3.rs-6846233/v1), 2025-06-16
Supplement: Supplementary file 297 [file 30627.xls]

## Sheet: Sheet1
10.25	386	3956.5	0.00690543		0.15
10.24	26	266.24	0.000465133		0.14
10.23	363	3713.49	0.00649397		0.13
10.22	1138	11630.4	0.0203585		0.12
10.21	1171	11955.9	0.0209489		0.11
10.2	2321	23674.2	0.0415221		0.1
10.19	1248	12717.1	0.0223264		0.09
10.18	2825	28758.5	0.0505385		0.08
10.17	1790	18204.3	0.0320226		0.07
10.16	1711	17383.8	0.0306093		0.06
10.15	1971	20005.7	0.0352607		0.05
10.14	1558	15798.1	0.0278722		0.04
10.13	1185	12004.1	0.0211993		0.03
10.12	2284	23114.1	0.0408601		0.02
10.11	1607	16246.8	0.0287488		0.01
10.1	8256	83385.6	0.147698		0
10.09	2576	25991.8	0.0460839		-0.01
10.08	1567	15795.4	0.0280332		-0.02
10.07	634	6384.38	0.0113421		-0.03
10.06	1604	16136.2	0.0286951		-0.04
10.05	3475	34923.8	0.0621668		-0.05
10.04	5605	56274.2	0.100272		-0.06
10.03	6905	69257.2	0.123529		-0.07
10.02	2413	24178.3	0.0431679		-0.08
10.01	1279	12802.8	0.022881		-0.09
	55898	10.0998
