# Supplementary material for: Interaction Wave Functions and Interaction-Based Coherence and Entanglement in Complex Adaptive Systems
Source: Research Square preprint supplement (doi:10.21203/rs.3.rs-6846233/v1), 2025-06-16
Supplement: Supplementary file 298 [file 30630.xls]

## Sheet: Sheet1
10.22	384	3924.48	0.00665165		0.21
10.21	1234	12599.1	0.0213754		0.2
10.2	1961	20002.2	0.0339685		0.19
10.19	1001	10200.2	0.0173393		0.18
10.18	1331	13549.6	0.0230556		0.17
10.17	159	1617.03	0.0027542		0.16
10.16	716	7274.56	0.0124026		0.15
10.15	346	3511.9	0.00599342		0.14
10.14	36	365.04	0.000623593		0.13
10.13	119	1205.47	0.00206132		0.12
10.12	293	2965.16	0.00507535		0.11
10.11	478	4832.58	0.00827992		0.1
10.1	1449	14634.9	0.0250996		0.09
10.09	651	6568.59	0.0112766		0.08
10.08	584	5886.72	0.0101161		0.07
10.07	0	0	0		0.06
10.06	86	865.16	0.00148969		0.05
10.05	1532	15396.6	0.0265373		0.04
10.04	738	7409.52	0.0127836		0.03
10.03	1848	18535.4	0.0320111		0.02
10.02	1986	19899.7	0.0344015		0.01
10.01	1757	17587.6	0.0304348		0
10	17283	172830	0.299376		-0.01
9.99	3051	30479.5	0.0528495		-0.02
9.98	3294	32874.1	0.0570587		-0.03
9.97	1782	17766.5	0.0308678		-0.04
9.96	2784	27728.6	0.0482245		-0.05
9.95	1860	18507	0.032219		-0.06
9.94	1506	14969.6	0.026087		-0.07
9.93	789	7834.77	0.0136671		-0.08
9.92	2239	22210.9	0.038784		-0.09
9.91	3389	33585	0.0587043		-0.1
9.9	1064	10533.6	0.0184306		-0.11
	57730	10.0147
