# Supplementary material for: Interaction Wave Functions and Interaction-Based Coherence and Entanglement in Complex Adaptive Systems
Source: Research Square preprint supplement (doi:10.21203/rs.3.rs-6846233/v1), 2025-06-16
Supplement: Supplementary file 299 [file 30602-06.xls]

## Sheet: Sheet1
0.29		23				23	6.67	4.32452e-05
0.28		734				734	205.52	0.00138009
0.27		990	389			1379	372.33	0.00259283
0.26		154	669			823	213.98	0.00154743
0.25		975	492			1467	366.75	0.00275829
0.24		0	56	40		96	23.04	0.000180502
0.23		254	524	110		888	204.24	0.00166964
0.22		202	591	249		1042	229.24	0.0019592
0.21		0	1281	671		1952	409.92	0.0036702
0.2		335	2747	169		3251	650.2	0.00611261
0.19		158	1479	120		1757	333.83	0.00330356
0.18		377	1167	100	99	1743	313.74	0.00327723
0.17		296	3385	25	125	3831	651.27	0.00720315
0.16	783	856	553	1136	132	3460	553.6	0.00650558
0.15	3336	1210	4652	311	298	9807	1471.05	0.0184394
0.14	0	163	2891	689	1117	4860	680.4	0.0091379
0.13	1220	298	4861	759	850	7988	1038.44	0.0150192
0.12	6676	597	6678	403	336	14690	1762.8	0.0276205
0.11	2723	1019	2770	1091	1831	9434	1037.74	0.0177381
0.1	5589	3000	1049	527	1174	11339	1133.9	0.0213199
0.09	7781	470	4694	770	4141	17856	1607.04	0.0335733
0.08	6403	3575	3203	1474	1818	16473	1317.84	0.030973
0.07	10909	1231	2782	478	5377	20777	1454.39	0.0390655
0.06	1553	1667	1830	7168	1484	13702	822.12	0.0257629
0.05	3018	16276	4189	2149	2896	28528	1426.4	0.0536391
0.04	624	3521	886	1999	2965	9995	399.8	0.0187929
0.03	2958	5463	3715	989	1917	15042	451.26	0.0282824
0.02	3219	7771	5959	1381	2698	21028	420.56	0.0395374
0.01	2144	2369	2060	7322	2380	16275	162.75	0.0306007
-1.42247e-16	1822	17612	1067	2184	4373	27058	-3.84893e-12	0.0508752
-0.01	1441	3101	2715	3419	12815	23491	-234.91	0.0441684
-0.02	3722	5395	3090	3947	2161	18315	-366.3	0.0344363
-0.03	15083	898	10514	3224	8945	38664	-1159.92	0.0726971
-0.04	2064	1833	7325	5416	7895	24533	-981.32	0.0461276
-0.05	6497	7022	5172	909	4060	23660	-1183	0.0444861
-0.06	4423	2120	2419	1805	304	11071	-664.26	0.020816
-0.07	6505	4353	965	811	1655	14289	-1000.23	0.0268665
-0.08	8014	7129	5157	2475	128	22903	-1832.24	0.0430628
-0.09	3353	6368	1764	4068	185	15738	-1416.42	0.029591
-0.1	2022	7652	1470	586	0	11730	-1173	0.022055
-0.11	1109	1200	3204	405	4892	10810	-1189.1	0.0203252
-0.12	1188	1172	2566	396	737	6059	-727.08	0.0113923
-0.13	6450	201	8927	639	2433	18650	-2424.5	0.0350662
-0.14	277		2977	161		3415	-478.1	0.00642097
-0.15	1074		1856	0		2930	-439.5	0.00550906
-0.16	438		848	0		1286	-205.76	0.00241797
-0.17	567		4112	0		4679	-795.43	0.00879758
-0.18	2380		3364	0		5744	-1033.92	0.0108
-0.19	0		1707	1199		2906	-552.14	0.00546394
-0.2	558		1342			1900	-380	0.00357243
-0.21	695		50			745	-156.45	0.00140077
-0.22			1035			1035	-227.7	0.00194603
						531851	0.00206738
