# Supplementary material for: Interaction Wave Functions and Interaction-Based Coherence and Entanglement in Complex Adaptive Systems
Source: Research Square preprint supplement (doi:10.21203/rs.3.rs-6846233/v1), 2025-06-16
Supplement: Supplementary file 300 [file 30602.xls]

## Sheet: Sheet1
13.19	783	10327.8	0.00608779		0.16
13.18	3336	43968.5	0.0259373		0.15
13.17	0	0	0		0.14
13.16	1220	16055.2	0.00948545		0.13
13.15	6676	87789.4	0.0519056		0.12
13.14	2723	35780.2	0.0211712		0.11
13.13	5589	73383.6	0.0434543		0.1
13.12	7781	102087	0.060497		0.09
13.11	6403	83943.3	0.0497831		0.08
13.1	10909	142908	0.0848171		0.07
13.09	1553	20328.8	0.0120745		0.06
13.08	3018	39475.4	0.0234648		0.05
13.07	624	8155.68	0.00485158		0.04
13.06	2958	38631.5	0.0229983		0.03
13.05	3219	42008	0.0250276		0.02
13.04	2144	27957.8	0.0166695		0.01
13.03	1822	23740.7	0.014166		0
13.02	1441	18761.8	0.0112037		-0.01
13.01	3722	48423.2	0.0289384		-0.02
13	15083	196079	0.11727		-0.03
12.99	2064	26811.4	0.0160475		-0.04
12.98	6497	84331.1	0.0505139		-0.05
12.97	4423	57366.3	0.0343887		-0.06
12.96	6505	84304.8	0.0505761		-0.07
12.95	8014	103781	0.0623085		-0.08
12.94	3353	43387.8	0.0260694		-0.09
12.93	2022	26144.5	0.015721		-0.1
12.92	1109	14328.3	0.00862243		-0.11
12.91	1188	15337.1	0.00923665		-0.12
12.9	6450	83205	0.0501485		-0.13
12.89	277	3570.53	0.00215366		-0.14
12.88	1074	13833.1	0.00835031		-0.15
12.87	438	5637.06	0.00340543		-0.16
12.86	567	7291.62	0.0044084		-0.17
12.85	2380	30583	0.0185044		-0.18
12.84	0	0	0		-0.19
12.83	558	7159.14	0.00433843		-0.2
12.82	695	8909.9	0.0054036		-0.21
	128618	13.0292
