# Supplementary material for: Interaction Wave Functions and Interaction-Based Coherence and Entanglement in Complex Adaptive Systems
Source: Research Square preprint supplement (doi:10.21203/rs.3.rs-6846233/v1), 2025-06-16
Supplement: Supplementary file 301 [file 30603.xls]

## Sheet: Sheet1
13.19	23	303.37	0.000191603		0.29
13.18	734	9674.12	0.00611463		0.28
13.17	990	13038.3	0.00824725		0.27
13.16	154	2026.64	0.00128291		0.26
13.15	975	12821.2	0.00812229		0.25
13.14	0	0	0		0.24
13.13	254	3335.02	0.00211596		0.23
13.12	202	2650.24	0.00168277		0.22
13.11	0	0	0		0.21
13.1	335	4388.5	0.00279074		0.2
13.09	158	2068.22	0.00131623		0.19
13.08	377	4931.16	0.00314062		0.18
13.07	296	3868.72	0.00246584		0.17
13.06	856	11179.4	0.00713096		0.16
13.05	1210	15790.5	0.01008		0.15
13.04	163	2125.52	0.00135788		0.14
13.03	298	3882.94	0.00248251		0.13
13.02	597	7772.94	0.00497334		0.12
13.01	1019	13257.2	0.00848884		0.11
13	3000	39000	0.0249917		0.1
12.99	470	6105.3	0.00391536		0.09
12.98	3575	46403.5	0.0297817		0.08
12.97	1231	15966.1	0.0102549		0.07
12.96	1667	21604.3	0.013887		0.06
12.95	16276	210774	0.135588		0.05
12.94	3521	45561.7	0.0293319		0.04
12.93	5463	70636.6	0.0455098		0.03
12.92	7771	100401	0.0647368		0.02
12.91	2369	30583.8	0.0197351		0.01
12.9	17612	227195	0.146718		0
12.89	3101	39971.9	0.0258331		-0.01
12.88	5395	69487.6	0.0449434		-0.02
12.87	898	11557.3	0.00748084		-0.03
12.86	1833	23572.4	0.0152699		-0.04
12.85	7022	90232.7	0.0584972		-0.05
12.84	2120	27220.8	0.0176608		-0.06
12.83	4353	55849	0.0362629		-0.07
12.82	7129	91393.8	0.0593885		-0.08
12.81	6368	81574.1	0.053049		-0.09
12.8	7652	97945.6	0.0637454		-0.1
12.79	1200	15348	0.00999667		-0.11
12.78	1172	14978.2	0.00976341		-0.12
12.77	201	2566.77	0.00167444		-0.13
	120040	12.9044
