# Supplementary material for: Interaction Wave Functions and Interaction-Based Coherence and Entanglement in Complex Adaptive Systems
Source: Research Square preprint supplement (doi:10.21203/rs.3.rs-6846233/v1), 2025-06-16
Supplement: Supplementary file 302 [file 30604.xls]

## Sheet: Sheet1
12.8	389	4979.2	0.00279458		0.27
12.79	669	8556.51	0.0048061		0.26
12.78	492	6287.76	0.00353453		0.25
12.77	56	715.12	0.000402305		0.24
12.76	524	6686.24	0.00376442		0.23
12.75	591	7535.25	0.00424575		0.22
12.74	1281	16319.9	0.00920272		0.21
12.73	2747	34969.3	0.0197345		0.2
12.72	1479	18812.9	0.0106252		0.19
12.71	1167	14832.6	0.00838374		0.18
12.7	3385	42989.5	0.0243179		0.17
12.69	553	7017.57	0.00397276		0.16
12.68	4652	58987.4	0.03342		0.15
12.67	2891	36629	0.020769		0.14
12.66	4861	61540.3	0.0349215		0.13
12.65	6678	84476.7	0.0479748		0.12
12.64	2770	35012.8	0.0198997		0.11
12.63	1049	13248.9	0.00753603		0.1
12.62	4694	59238.3	0.0337217		0.09
12.61	3203	40389.8	0.0230104		0.08
12.6	2782	35053.2	0.0199859		0.07
12.59	1830	23039.7	0.0131467		0.06
12.58	4189	52697.6	0.0300938		0.05
12.57	886	11137	0.00636503		0.04
12.56	3715	46660.4	0.0266886		0.03
12.55	5959	74785.5	0.0428095		0.02
12.54	2060	25832.4	0.0147991		0.01
12.53	1067	13369.5	0.00766534		0
12.52	2715	33991.8	0.0195046		-0.01
12.51	3090	38655.9	0.0221986		-0.02
12.5	10514	131425	0.0755327		-0.03
12.49	7325	91489.3	0.0526229		-0.04
12.48	5172	64546.6	0.0371557		-0.05
12.47	2419	30164.9	0.0173781		-0.06
12.46	965	12023.9	0.00693257		-0.07
12.45	5157	64204.7	0.0370479		-0.08
12.44	1764	21944.2	0.0126726		-0.09
12.43	1470	18272.1	0.0105605		-0.1
12.42	3204	39793.7	0.0230176		-0.11
12.41	2566	31844.1	0.0184342		-0.12
12.4	8927	110695	0.0641317		-0.13
12.39	2977	36885	0.0213868		-0.14
12.38	1856	22977.3	0.0133335		-0.15
12.37	848	10489.8	0.00609204		-0.16
12.36	4112	50824.3	0.0295407		-0.17
12.35	3364	41545.4	0.024167		-0.18
12.34	1707	21064.4	0.0122631		-0.19
12.33	1342	16546.9	0.00964094		-0.2
12.32	50	616	0.000359201		-0.21
12.31	1035	12740.9	0.00743545		-0.22
	139198	12.5328
