# Supplementary material for: Interaction Wave Functions and Interaction-Based Coherence and Entanglement in Complex Adaptive Systems
Source: Research Square preprint supplement (doi:10.21203/rs.3.rs-6846233/v1), 2025-06-16
Supplement: Supplementary file 303 [file 30605.xls]

## Sheet: Sheet1
12.78	40	511.2	0.000647522		0.24
12.77	110	1404.7	0.00178068		0.23
12.76	249	3177.24	0.00403082		0.22
12.75	671	8555.25	0.0108622		0.21
12.74	169	2153.06	0.00273578		0.2
12.73	120	1527.6	0.00194256		0.19
12.72	100	1272	0.0016188		0.18
12.71	25	317.75	0.000404701		0.17
12.7	1136	14427.2	0.0183896		0.16
12.69	311	3946.59	0.00503448		0.15
12.68	689	8736.52	0.0111536		0.14
12.67	759	9616.53	0.0122867		0.13
12.66	403	5101.98	0.00652378		0.12
12.65	1091	13801.2	0.0176612		0.11
12.64	527	6661.28	0.0085311		0.1
12.63	770	9725.1	0.0124648		0.09
12.62	1474	18601.9	0.0238612		0.08
12.61	478	6027.58	0.00773788		0.07
12.6	7168	90316.8	0.116036		0.06
12.59	2149	27055.9	0.0347881		0.05
12.58	1999	25147.4	0.0323599		0.04
12.57	989	12431.7	0.01601		0.03
12.56	1381	17345.4	0.0223557		0.02
12.55	7322	91891.1	0.118529		0.01
12.54	2184	27387.4	0.0353547		0
12.53	3419	42840.1	0.0553469		-0.01
12.52	3947	49416.4	0.0638942		-0.02
12.51	3224	40332.2	0.0521902		-0.03
12.5	5416	67700	0.0876744		-0.04
12.49	909	11353.4	0.0147149		-0.05
12.48	1805	22526.4	0.0292194		-0.06
12.47	811	10113.2	0.0131285		-0.07
12.46	2475	30838.5	0.0400654		-0.08
12.45	4068	50646.6	0.0658529		-0.09
12.44	586	7289.84	0.00948619		-0.1
12.43	405	5034.15	0.00655616		-0.11
12.42	396	4918.32	0.00641046		-0.12
12.41	639	7929.99	0.0103442		-0.13
12.4	161	1996.4	0.00260627		-0.14
12.39	0	0	0		-0.15
12.38	0	0	0		-0.16
12.37	0	0	0		-0.17
12.36	0	0	0		-0.18
12.35	1199	14807.7	0.0194095		-0.19
	61774	12.5438
