# Supplementary material for: Interaction Wave Functions and Interaction-Based Coherence and Entanglement in Complex Adaptive Systems
Source: Research Square preprint supplement (doi:10.21203/rs.3.rs-6846233/v1), 2025-06-16
Supplement: Supplementary file 304 [file 30606.xls]

## Sheet: Sheet1
12.49	99	1236.51	0.00120407		0.18
12.48	125	1560	0.00152029		0.17
12.47	132	1646.04	0.00160543		0.16
12.46	298	3713.08	0.00362438		0.15
12.45	1117	13906.7	0.0135853		0.14
12.44	850	10574	0.010338		0.13
12.43	336	4176.48	0.00408655		0.12
12.42	1831	22741	0.0222692		0.11
12.41	1174	14569.3	0.0142786		0.1
12.4	4141	51348.4	0.0503643		0.09
12.39	1818	22525	0.0221111		0.08
12.38	5377	66567.3	0.0653969		0.07
12.37	1484	18357.1	0.0180489		0.06
12.36	2896	35794.6	0.0352221		0.05
12.35	2965	36617.8	0.0360613		0.04
12.34	1917	23655.8	0.0233152		0.03
12.33	2698	33266.3	0.032814		0.02
12.32	2380	29321.6	0.0289464		0.01
12.31	4373	53831.6	0.0531859		0
12.3	12815	157625	0.15586		-0.01
12.29	2161	26558.7	0.0262828		-0.02
12.28	8945	109845	0.108792		-0.03
12.27	7895	96871.7	0.0960217		-0.04
12.26	4060	49775.6	0.0493791		-0.05
12.25	304	3724	0.00369735		-0.06
12.24	1655	20257.2	0.0201287		-0.07
12.23	128	1565.44	0.00155678		-0.08
12.22	185	2260.7	0.00225003		-0.09
12.21	0	0	0		-0.1
12.2	4892	59682.4	0.0594982		-0.11
12.19	737	8984.03	0.00896365		-0.12
12.18	2433	29633.9	0.029591		-0.13
	82221	12.3106
