# Supplementary material for: Interaction Wave Functions and Interaction-Based Coherence and Entanglement in Complex Adaptive Systems
Source: Research Square preprint supplement (doi:10.21203/rs.3.rs-6846233/v1), 2025-06-16
Supplement: Supplementary file 305 [file 30609-13.xls]

## Sheet: Sheet1
0.16	1222					1222	195.52	0.00579771
0.15	494					494	74.1	0.00234375
0.14	0					0	0	0
0.13	168			128		296	38.48	0.00140435
0.12	1354			460	157	1971	236.52	0.00935129
0.11	135		374	410	0	919	101.09	0.00436014
0.1	13		747	901	0	1661	166.1	0.00788052
0.09	191		5289	940	107	6527	587.43	0.030967
0.08	92	1582	3182	2040	293	7189	575.12	0.0341078
0.07	3068	495	2015	1491	1045	8114	567.98	0.0384964
0.06	1337	1198	1149	916	963	5563	333.78	0.0263933
0.05	1349	1582	1874	3530	1563	9898	494.9	0.0469605
0.04	1393	1585	6391	1102	2451	12922	516.88	0.0613077
0.03	736	1930	5085	4139	1901	13791	413.73	0.0654306
0.02	8492	2576	2860	2797	1691	18416	368.32	0.0873736
0.01	2881	1787	4525	3444	315	12952	129.52	0.06145
0	2308	4126	2206	2499	1379	12518	0	0.0593909
-0.01	3508	2357	4377	3504	1706	15452	-154.52	0.0733111
-0.02	3651	4447	534	1846	1341	11819	-236.38	0.0560745
-0.03	7235	2034	773	732	1769	12543	-376.29	0.0595095
-0.04	1646	2836	406	1789	1812	8489	-339.56	0.0402756
-0.05	2665	1766	658	3567	1020	9676	-483.8	0.0459072
-0.06	1276	1148	2259	1068	2497	8248	-494.88	0.0391321
-0.07	4058	166	1872	2648	1168	9912	-693.84	0.0470269
-0.08	2272	533	1129	2439	509	6882	-550.56	0.0326512
-0.09	0	69	656	464		1189	-107.01	0.00564114
-0.1	60	100	648	300		1108	-110.8	0.00525684
-0.11	251	0	2720	50		3021	-332.31	0.014333
-0.12	544	868.984	1592	49		3053.98	-366.478	0.0144894
-0.13	1222		513			1735	-225.55	0.00823161
-0.14			357			357	-49.98	0.00169377
-0.15			388			388	-58.2	0.00184084
-0.16			1714			1714	-274.24	0.00813197
-0.17			23			23	-3.91	0.000109122
-0.18			125			125	-22.5	0.000593055
-0.19			271			271	-51.49	0.00128574
-0.2			0			0	0	0
-0.21			52			52	-10.92	0.000246711
-0.22			262			262	-57.64	0.00124304
						210773	-0.000955474
