# Supplementary material for: Interaction Wave Functions and Interaction-Based Coherence and Entanglement in Complex Adaptive Systems
Source: Research Square preprint supplement (doi:10.21203/rs.3.rs-6846233/v1), 2025-06-16
Supplement: Supplementary file 306 [file 30609.xls]

## Sheet: Sheet1
12.29	1222	15018.4	0.0227896		0.16
12.28	494	6066.32	0.00921281		0.15
12.27	0	0	0		0.14
12.26	168	2059.68	0.0031331		0.13
12.25	1354	16586.5	0.0252513		0.12
12.24	135	1652.4	0.00251767		0.11
12.23	13	158.99	0.000242442		0.1
12.22	191	2334.02	0.00356204		0.09
12.21	92	1123.32	0.00171575		0.08
12.2	3068	37429.6	0.0572164		0.07
12.19	1337	16298	0.0249343		0.06
12.18	1349	16430.8	0.0251581		0.05
12.17	1393	16952.8	0.0259786		0.04
12.16	736	8949.76	0.013726		0.03
12.15	8492	103178	0.158371		0.02
12.14	2881	34975.3	0.0537289		0.01
12.13	2308	27996	0.0430428		0
12.12	3508	42517	0.0654221		-0.01
12.11	3651	44213.6	0.068089		-0.02
12.1	7235	87543.5	0.134928		-0.03
12.09	1646	19900.1	0.0306969		-0.04
12.08	2665	32193.2	0.0497007		-0.05
12.07	1276	15401.3	0.0237966		-0.06
12.06	4058	48939.5	0.0756793		-0.07
12.05	2272	27377.6	0.0423715		-0.08
12.04	0	0	0		-0.09
12.03	60	721.8	0.00111896		-0.1
12.02	251	3017.02	0.004681		-0.11
12.01	544	6533.44	0.0101453		-0.12
12	1222	14664	0.0227896		-0.13
	53621	12.1264
