# Supplementary material for: Interaction Wave Functions and Interaction-Based Coherence and Entanglement in Complex Adaptive Systems
Source: Research Square preprint supplement (doi:10.21203/rs.3.rs-6846233/v1), 2025-06-16
Supplement: Supplementary file 307 [file 30610.xls]

## Sheet: Sheet1
12.3	1582	19458.6	0.0476707		0.08
12.29	495	6083.55	0.0149159		0.07
12.28	1198	14711.4	0.0360996		0.06
12.27	1582	19411.1	0.0476707		0.05
12.26	1585	19432.1	0.0477611		0.04
12.25	1930	23642.5	0.0581571		0.03
12.24	2576	31530.2	0.0776231		0.02
12.23	1787	21855	0.053848		0.01
12.22	4126	50419.7	0.12433		0
12.21	2357	28779	0.071024		-0.01
12.2	4447	54253.4	0.134002		-0.02
12.19	2034	24794.5	0.0612909		-0.03
12.18	2836	34542.5	0.0854578		-0.04
12.17	1766	21492.2	0.0532152		-0.05
12.16	1148	13959.7	0.0345929		-0.06
12.15	166	2016.9	0.00500211		-0.07
12.14	533	6470.62	0.016061		-0.08
12.13	69	836.97	0.00207919		-0.09
12.12	100	1212	0.00301332		-0.1
12.11	0	0	0		-0.11
12.1	868.984	10514.7	0.0261853		-0.12
	33186	12.2165
