# Supplementary material for: Interaction Wave Functions and Interaction-Based Coherence and Entanglement in Complex Adaptive Systems
Source: Research Square preprint supplement (doi:10.21203/rs.3.rs-6846233/v1), 2025-06-16
Supplement: Supplementary file 308 [file 30611.xls]

## Sheet: Sheet1
12.52	374	4682.48	0.00655841		0.11
12.51	747	9344.97	0.0130993		0.1
12.5	5289	66112.5	0.0927472		0.09
12.49	3182	39743.2	0.0557991		0.08
12.48	2015	25147.2	0.0353348		0.07
12.47	1149	14328	0.0201487		0.06
12.46	1874	23350	0.0328622		0.05
12.45	6391	79568	0.112072		0.04
12.44	5085	63257.4	0.0891699		0.03
12.43	2860	35549.8	0.0501526		0.02
12.42	4525	56200.5	0.0793498		0.01
12.41	2206	27376.5	0.0386841		0
12.4	4377	54274.8	0.0767545		-0.01
12.39	534	6616.26	0.00936415		-0.02
12.38	773	9569.74	0.0135552		-0.03
12.37	406	5022.22	0.00711956		-0.04
12.36	658	8132.88	0.0115386		-0.05
12.35	2259	27898.7	0.0396135		-0.06
12.34	1872	23100.5	0.0328271		-0.07
12.33	1129	13920.6	0.019798		-0.08
12.32	656	8081.92	0.0115035		-0.09
12.31	648	7976.88	0.0113632		-0.1
12.3	2720	33456	0.0476975		-0.11
12.29	1592	19565.7	0.0279171		-0.12
12.28	513	6299.64	0.0089959		-0.13
12.27	357	4380.39	0.0062603		-0.14
12.26	388	4756.88	0.00680391		-0.15
12.25	1714	20996.5	0.0300565		-0.16
12.24	23	281.52	0.000403325		-0.17
12.23	125	1528.75	0.00219198		-0.18
12.22	271	3311.62	0.00475222		-0.19
12.21	0	0	0		-0.2
12.2	52	634.4	0.000911865		-0.21
12.19	262	3193.78	0.0045944		-0.22
	57026	12.4094
