# Supplementary material for: Interaction Wave Functions and Interaction-Based Coherence and Entanglement in Complex Adaptive Systems
Source: Research Square preprint supplement (doi:10.21203/rs.3.rs-6846233/v1), 2025-06-16
Supplement: Supplementary file 309 [file 30612.xls]

## Sheet: Sheet1
12.58	128	1610.24	0.00295933		0.13
12.57	460	5782.2	0.0106351		0.12
12.56	410	5149.6	0.00947911		0.11
12.55	901	11307.6	0.0208309		0.1
12.54	940	11787.6	0.0217326		0.09
12.53	2040	25561.2	0.0471644		0.08
12.52	1491	18667.3	0.0344716		0.07
12.51	916	11459.2	0.0211777		0.06
12.5	3530	44125	0.0816128		0.05
12.49	1102	13764	0.025478		0.04
12.48	4139	51654.7	0.0956928		0.03
12.47	2797	34878.6	0.064666		0.02
12.46	3444	42912.2	0.0796245		0.01
12.45	2499	31112.6	0.0577763		0
12.44	3504	43589.8	0.0810117		-0.01
12.43	1846	22945.8	0.0426791		-0.02
12.42	732	9091.44	0.0169237		-0.03
12.41	1789	22201.5	0.0413613		-0.04
12.4	3567	44230.8	0.0824683		-0.05
12.39	1068	13232.5	0.0246919		-0.06
12.38	2648	32782.2	0.0612212		-0.07
12.37	2439	30170.4	0.0563892		-0.08
12.36	464	5735.04	0.0107276		-0.09
12.35	300	3705	0.00693594		-0.1
12.34	50	617	0.00115599		-0.11
12.33	49	604.17	0.00113287		-0.12
	43253	12.4541
