# Supplementary material for: Interaction Wave Functions and Interaction-Based Coherence and Entanglement in Complex Adaptive Systems
Source: Research Square preprint supplement (doi:10.21203/rs.3.rs-6846233/v1), 2025-06-16
Supplement: Supplementary file 310 [file 30613.xls]

## Sheet: Sheet1
12.58	157	1975.06	0.00662811		0.12
12.57	0	0	0		0.11
12.56	0	0	0		0.1
12.55	107	1342.85	0.00451725		0.09
12.54	293	3674.22	0.0123697		0.08
12.53	1045	13093.9	0.044117		0.07
12.52	963	12056.8	0.0406552		0.06
12.51	1563	19553.1	0.0659856		0.05
12.5	2451	30637.5	0.103474		0.04
12.49	1901	23743.5	0.080255		0.03
12.48	1691	21103.7	0.0713894		0.02
12.47	315	3928.05	0.0132984		0.01
12.46	1379	17182.3	0.0582176		0
12.45	1706	21239.7	0.0720226		-0.01
12.44	1341	16682	0.0566133		-0.02
12.43	1769	21988.7	0.0746823		-0.03
12.42	1812	22505	0.0764977		-0.04
12.41	1020	12658.2	0.0430616		-0.05
12.4	2497	30962.8	0.105416		-0.06
12.39	1168	14471.5	0.0493097		-0.07
12.38	509	6301.42	0.0214886		-0.08
	23687	12.4583
