# Supplementary material for: Interaction Wave Functions and Interaction-Based Coherence and Entanglement in Complex Adaptive Systems
Source: Research Square preprint supplement (doi:10.21203/rs.3.rs-6846233/v1), 2025-06-16
Supplement: Supplementary file 311 [file 30616-20-.xls]

## Sheet: Sheet1
12.8			742			742	9497.6	0.00279104
12.79			284			284	3632.36	0.00106827
12.78		7	634			641	8191.98	0.00241113
12.77		381	248			629	8032.33	0.00236599
12.76		334	1053			1387	17698.1	0.00521721
12.75		1525	1379			2904	37026	0.0109234
12.74		294	1147			1441	18358.3	0.00542033
12.73	1316	1136	1742			4194	53389.6	0.0157758
12.72	663	1631	2198			4492	57138.2	0.0168967
12.71	391	1708	1540			3639	46251.7	0.0136881
12.7	6221	6450	5807			18478	234671	0.0695051
12.69	1692	1489	654			3835	48666.2	0.0144254
12.68	1970	2287	2029			6286	79706.5	0.0236448
12.67	2884	772	121			3777	47854.6	0.0142072
12.66	3094	8237	494			11825	149705	0.0444798
12.65	5474	5682	2538			13694	173229	0.0515101
12.64	2406	1384	243			4033	50977.1	0.0151702
12.63	1470	1112	330			2912	36778.6	0.0109535
12.62	1224	1578	258			3060	38617.2	0.0115102
12.61	947	389	2136			3472	43781.9	0.0130599
12.6	2693	1603	3994			8290	104454	0.0311829
12.59	233	128	872			1233	15523.5	0.00463794
12.58	1278	303	1988			3569	44898	0.0134248
12.57	5	38	191			234	2941.38	0.000880192
12.56	115	25	1004			1144	14368.6	0.00430316
12.55	1540	531	1458	478		4007	50287.9	0.0150724
12.54	10		427	11		448	5617.92	0.00168515
12.53	1601		1526	179		3306	41424.2	0.0124355
12.52	2601		2110	30		4741	59357.3	0.0178333
12.51	6890		4395	388		11673	146029	0.0439081
12.5	8926		2323	3810		15059	188238	0.0566445
12.49	2159		2809	93		5061	63211.9	0.019037
12.48	1472		1565	1127		4164	51966.7	0.0156629
12.47	743		388	1186		2317	28893	0.00871541
12.46	486		1468	1863		3817	47559.8	0.0143577
12.45	1697		7	2497		4201	52302.5	0.0158021
12.44	926			1195		2121	26385.2	0.00797815
12.43	256			1395		1651	20521.9	0.00621025
12.42	87			1492		1579	19611.2	0.00593942
12.41	1037			2520		3557	44142.4	0.0133797
12.4	652			4869		5521	68460.4	0.0207673
12.39	13			1772		1785	22116.2	0.00671429
12.38				4428		4428	54818.6	0.0166559
12.37				1104		1104	13656.5	0.0041527
12.36				3481		3481	43025.2	0.0130938
12.35				1850		1850	22847.5	0.00695879
12.34				936	15	951	11735.3	0.00357719
12.33				2216	0	2216	27323.3	0.0083355
12.32				2092	3	2095	25810.4	0.00788035
12.31				1630	19	1649	20299.2	0.00620272
12.3				3727	747	4474	55030.2	0.016829
12.29				478	241	719	8836.51	0.00270452
12.28				1168	126	1294	15890.3	0.00486739
12.27				1331	190	1521	18662.7	0.00572125
12.26				1310	1418	2728	33445.3	0.0102614
12.25				1274	2482	3756	46011	0.0141282
12.24				22	709	731	8947.44	0.00274966
12.23					724	724	8854.52	0.00272333
12.22					2363	2363	28875.9	0.00888844
12.21					1123	1123	13711.8	0.00422417
12.2					4990	4990	60878	0.0187699
12.19					1604	1604	19552.8	0.00603345
12.18					2046	2046	24920.3	0.00769604
12.17					2413	2413	29366.2	0.00907651
12.16					4873	4873	59255.7	0.0183298
12.15					5611	5611	68173.7	0.0211058
12.14					2372	2372	28796.1	0.00892229
12.13					402	402	4876.26	0.00151213
12.12					2948	2948	35729.8	0.0110889
12.11					2541	2541	30771.5	0.00955799
12.1					6528	6528	78988.8	0.0245551
12.09					1471	1471	17784.4	0.00553317
12.08					3595	3595	43427.6	0.0135226
12.07					1522	1522	18370.5	0.00572501
12.06					914	914	11022.8	0.00343802
12.05					3098	3098	37330.9	0.0116531
12.04					407	407	4900.28	0.00153093
12.03					106	106	1275.18	0.00039872
						265851	12.4683
