# Supplementary material for: Interaction Wave Functions and Interaction-Based Coherence and Entanglement in Complex Adaptive Systems
Source: Research Square preprint supplement (doi:10.21203/rs.3.rs-6846233/v1), 2025-06-16
Supplement: Supplementary file 312 [file 30616-20.xls]

## Sheet: Sheet1
0.19			742		15	757	143.83	0.00284746
0.18			284		0	284	51.12	0.00106827
0.17			634	478	3	1115	189.55	0.00419408
0.16			248	11	19	278	44.48	0.0010457
0.15	1316		1053	179	747	3295	494.25	0.0123942
0.14	663		1379	30	241	2313	323.82	0.00870036
0.13	391		1147	388	126	2052	266.76	0.00771861
0.12	6221		1742	3810	190	11963	1435.56	0.0449989
0.11	1692	7	2198	93	1418	5408	594.88	0.0203422
0.1	1970	381	1540	1127	2482	7500	750	0.0282113
0.09	2884	334	5807	1186	709	10920	982.8	0.0410756
0.08	3094	1525	654	1863	724	7860	628.8	0.0295654
0.07	5474	294	2029	2497	2363	12657	885.99	0.0476094
0.06	2406	1136	121	1195	1123	5981	358.86	0.0224976
0.05	1470	1631	494	1395	4990	9980	499	0.0375398
0.04	1224	1708	2538	1492	1604	8566	342.64	0.0322211
0.03	947	6450	243	2520	2046	12206	366.18	0.0459129
0.02	2693	1489	330	4869	2413	11794	235.88	0.0443632
0.01	233	2287	258	1772	4873	9423	94.23	0.0354447
0	1278	772	2136	4428	5611	14225	0	0.0535074
-0.01	5	8237	3994	1104	2372	15712	-157.12	0.0591008
-0.02	115	5682	872	3481	402	10552	-211.04	0.0396914
-0.03	1540	1384	1988	1850	2948	9710	-291.3	0.0365242
-0.04	10	1112	191	936	2541	4790	-191.6	0.0180176
-0.05	1601	1578	1004	2216	6528	12927	-646.35	0.048625
-0.06	2601	389	1458	2092	1471	8011	-480.66	0.0301334
-0.07	6890	1603	427	1630	3595	14145	-990.15	0.0532065
-0.08	8926	128	1526	3727	1522	15829	-1266.32	0.0595409
-0.09	2159	303	2110	478	914	5964	-536.76	0.0224336
-0.1	1472	38	4395	1168	3098	10171	-1017.1	0.0382583
-0.11	743	25	2323	1331	407	4829	-531.19	0.0181643
-0.12	486	531	2809	1310	106	5242	-629.04	0.0197178
-0.13	1697		1565	1274		4536	-589.68	0.0170622
-0.14	926		388	22		1336	-187.04	0.00502537
-0.15	256		1468			1724	-258.6	0.00648484
-0.16	87		7			94	-15.04	0.000353582
-0.17	1037					1037	-176.29	0.00390068
-0.18	652					652	-117.36	0.0024525
-0.19	13					13	-2.47	4.88996e-05
						265851	0.00148023
