# Supplementary material for: Interaction Wave Functions and Interaction-Based Coherence and Entanglement in Complex Adaptive Systems
Source: Research Square preprint supplement (doi:10.21203/rs.3.rs-6846233/v1), 2025-06-16
Supplement: Supplementary file 313 [file 30616.xls]

## Sheet: Sheet1
12.73	1316	16752.7	0.0201927		0.15
12.72	663	8433.36	0.0101731		0.14
12.71	391	4969.61	0.00599951		0.13
12.7	6221	79006.7	0.0954551		0.12
12.69	1692	21471.5	0.0259621		0.11
12.68	1970	24979.6	0.0302277		0.1
12.67	2884	36540.3	0.0442521		0.09
12.66	3094	39170	0.0474744		0.08
12.65	5474	69246.1	0.0839931		0.07
12.64	2406	30411.8	0.0369177		0.06
12.63	1470	18566.1	0.0225557		0.05
12.62	1224	15446.9	0.0187811		0.04
12.61	947	11941.7	0.0145308		0.03
12.6	2693	33931.8	0.0413214		0.02
12.59	233	2933.47	0.00357515		0.01
12.58	1278	16077.2	0.0196096		0
12.57	5	62.85	7.67201e-05		-0.01
12.56	115	1444.4	0.00176456		-0.02
12.55	1540	19327	0.0236298		-0.03
12.54	10	125.4	0.00015344		-0.04
12.53	1601	20060.5	0.0245658		-0.05
12.52	2601	32564.5	0.0399098		-0.06
12.51	6890	86193.9	0.10572		-0.07
12.5	8926	111575	0.136961		-0.08
12.49	2159	26965.9	0.0331277		-0.09
12.48	1472	18370.6	0.0225864		-0.1
12.47	743	9265.21	0.0114006		-0.11
12.46	486	6055.56	0.00745719		-0.12
12.45	1697	21127.7	0.0260388		-0.13
12.44	926	11519.4	0.0142086		-0.14
12.43	256	3182.08	0.00392807		-0.15
12.42	87	1080.54	0.00133493		-0.16
12.41	1037	12869.2	0.0159117		-0.17
12.4	652	8084.8	0.0100043		-0.18
12.39	13	161.07	0.000199472		-0.19
	65172	12.5808		12.58
