# Supplementary material for: Interaction Wave Functions and Interaction-Based Coherence and Entanglement in Complex Adaptive Systems
Source: Research Square preprint supplement (doi:10.21203/rs.3.rs-6846233/v1), 2025-06-16
Supplement: Supplementary file 314 [file 30617.xls]

## Sheet: Sheet1
12.78	7	89.46	0.000179377		0.11
12.77	381	4865.37	0.00976322		0.1
12.76	334	4261.84	0.00855884		0.09
12.75	1525	19443.8	0.0390785		0.08
12.74	294	3745.56	0.00753383		0.07
12.73	1136	14461.3	0.0291103		0.06
12.72	1631	20746.3	0.0417948		0.05
12.71	1708	21708.7	0.0437679		0.04
12.7	6450	81915	0.165283		0.03
12.69	1489	18895.4	0.038156		0.02
12.68	2287	28999.2	0.058605		0.01
12.67	772	9781.24	0.0197827		0
12.66	8237	104280	0.211075		-0.01
12.65	5682	71877.3	0.145603		-0.02
12.64	1384	17493.8	0.0354654		-0.03
12.63	1112	14044.6	0.0284953		-0.04
12.62	1578	19914.4	0.0404367		-0.05
12.61	389	4905.29	0.00996822		-0.06
12.6	1603	20197.8	0.0410773		-0.07
12.59	128	1611.52	0.00328003		-0.08
12.58	303	3811.74	0.00776445		-0.09
12.57	38	477.66	0.00097376		-0.1
12.56	25	314	0.000640631		-0.11
12.55	531	6664.05	0.013607		-0.12
	39024	12.6718		12.67
