# Supplementary material for: Interaction Wave Functions and Interaction-Based Coherence and Entanglement in Complex Adaptive Systems
Source: Research Square preprint supplement (doi:10.21203/rs.3.rs-6846233/v1), 2025-06-16
Supplement: Supplementary file 315 [file 30618.xls]

## Sheet: Sheet1
12.8	742	9497.6	0.0142413		0.19
12.79	284	3632.36	0.00545085		0.18
12.78	634	8102.52	0.0121684		0.17
12.77	248	3166.96	0.00475989		0.16
12.76	1053	13436.3	0.0202104		0.15
12.75	1379	17582.3	0.0264673		0.14
12.74	1147	14612.8	0.0220145		0.13
12.73	1742	22175.7	0.0334344		0.12
12.72	2198	27958.6	0.0421865		0.11
12.71	1540	19573.4	0.0295574		0.1
12.7	5807	73748.9	0.111454		0.09
12.69	654	8299.26	0.0125523		0.08
12.68	2029	25727.7	0.0389428		0.07
12.67	121	1533.07	0.00232237		0.06
12.66	494	6254.04	0.0094814		0.05
12.65	2538	32105.7	0.0487121		0.04
12.64	243	3071.52	0.00466393		0.03
12.63	330	4167.9	0.00633373		0.02
12.62	258	3255.96	0.00495183		0.01
12.61	2136	26935	0.0409965		0
12.6	3994	50324.4	0.0766573		-0.01
12.59	872	10978.5	0.0167364		-0.02
12.58	1988	25009	0.0381559		-0.03
12.57	191	2400.87	0.00366589		-0.04
12.56	1004	12610.2	0.0192699		-0.05
12.55	1458	18297.9	0.0279836		-0.06
12.54	427	5354.58	0.00819546		-0.07
12.53	1526	19120.8	0.0292887		-0.08
12.52	2110	26417.2	0.0404975		-0.09
12.51	4395	54981.5	0.0843538		-0.1
12.5	2323	29037.5	0.0445856		-0.11
12.49	2809	35084.4	0.0539135		-0.12
12.48	1565	19531.2	0.0300372		-0.13
12.47	388	4838.36	0.00744693		-0.14
12.46	1468	18291.3	0.0281755		-0.15
12.45	7	87.15	0.000134352		-0.16
	52102	12.6138		12.61
