# Supplementary material for: Interaction Wave Functions and Interaction-Based Coherence and Entanglement in Complex Adaptive Systems
Source: Research Square preprint supplement (doi:10.21203/rs.3.rs-6846233/v1), 2025-06-16
Supplement: Supplementary file 316 [file 30619.xls]

## Sheet: Sheet1
12.55	478	5998.9	0.0092008		0.17
12.54	11	137.94	0.000211734		0.16
12.53	179	2242.87	0.00344549		0.15
12.52	30	375.6	0.000577456		0.14
12.51	388	4853.88	0.00746843		0.13
12.5	3810	47625	0.0733369		0.12
12.49	93	1161.57	0.00179011		0.11
12.48	1127	14065	0.0216931		0.1
12.47	1186	14789.4	0.0228288		0.09
12.46	1863	23213	0.03586		0.08
12.45	2497	31087.7	0.0480636		0.07
12.44	1195	14865.8	0.023002		0.06
12.43	1395	17339.9	0.0268517		0.05
12.42	1492	18530.6	0.0287188		0.04
12.41	2520	31273.2	0.0485063		0.03
12.4	4869	60375.6	0.0937211		0.02
12.39	1772	21955.1	0.0341084		0.01
12.38	4428	54818.6	0.0852325		0
12.37	1104	13656.5	0.0212504		-0.01
12.36	3481	43025.2	0.0670042		-0.02
12.35	1850	22847.5	0.0356098		-0.03
12.34	936	11550.2	0.0180166		-0.04
12.33	2216	27323.3	0.0426548		-0.05
12.32	2092	25773.4	0.0402679		-0.06
12.31	1630	20065.3	0.0313751		-0.07
12.3	3727	45842.1	0.0717393		-0.08
12.29	478	5874.62	0.0092008		-0.09
12.28	1168	14343	0.0224823		-0.1
12.27	1331	16331.4	0.0256198		-0.11
12.26	1310	16060.6	0.0252156		-0.12
12.25	1274	15606.5	0.0245226		-0.13
12.24	22	269.28	0.000423468		-0.14
	51952	12.3822		12.38
