# Supplementary material for: Interaction Wave Functions and Interaction-Based Coherence and Entanglement in Complex Adaptive Systems
Source: Research Square preprint supplement (doi:10.21203/rs.3.rs-6846233/v1), 2025-06-16
Supplement: Supplementary file 317 [file 30620.xls]

## Sheet: Sheet1
12.34	15	185.1	0.000260412		0.19
12.33	0	0	0		0.18
12.32	3	36.96	5.20824e-05		0.17
12.31	19	233.89	0.000329855		0.16
12.3	747	9188.1	0.0129685		0.15
12.29	241	2961.89	0.00418396		0.14
12.28	126	1547.28	0.00218746		0.13
12.27	190	2331.3	0.00329855		0.12
12.26	1418	17384.7	0.0246176		0.11
12.25	2482	30404.5	0.0430895		0.1
12.24	709	8678.16	0.0123088		0.09
12.23	724	8854.52	0.0125692		0.08
12.22	2363	28875.9	0.0410236		0.07
12.21	1123	13711.8	0.0194962		0.06
12.2	4990	60878	0.0866304		0.05
12.19	1604	19552.8	0.0278467		0.04
12.18	2046	24920.3	0.0355202		0.03
12.17	2413	29366.2	0.0418916		0.02
12.16	4873	59255.7	0.0845992		0.01
12.15	5611	68173.7	0.0974115		0
12.14	2372	28796.1	0.0411798		-0.01
12.13	402	4876.26	0.00697905		-0.02
12.12	2948	35729.8	0.0511797		-0.03
12.11	2541	30771.5	0.0441138		-0.04
12.1	6528	78988.8	0.113331		-0.05
12.09	1471	17784.4	0.0255378		-0.06
12.08	3595	43427.6	0.0624121		-0.07
12.07	1522	18370.5	0.0264232		-0.08
12.06	914	11022.8	0.0158678		-0.09
12.05	3098	37330.9	0.0537838		-0.1
12.04	407	4900.28	0.00706585		-0.11
12.03	106	1275.18	0.00184025		-0.12
	57601	12.1494		12.15
