# Supplementary material for: Interaction Wave Functions and Interaction-Based Coherence and Entanglement in Complex Adaptive Systems
Source: Research Square preprint supplement (doi:10.21203/rs.3.rs-6846233/v1), 2025-06-16
Supplement: Supplementary file 318 [file 30623-27.xls]

## Sheet: Sheet1
0.23				12		12		7.38044e-05
0.22				679		679		0.0041761
0.21				108		108		0.000664239
0.2				1406		1406		0.00864741
0.19				216		216		0.00132848
0.18				663		663		0.00407769
0.17				118		118		0.000725743
0.16				492	1334	1826		0.0112306
0.15				581	343	924		0.00568294
0.14				542	316	858		0.00527701
0.13				3161	0	3161		0.0194413
0.12	48			2511	42	2601		0.0159971
0.11	210		188	904	320	1622		0.00997589
0.1	1430		217	7224	747	9618		0.0591542
0.09	78	231	342	759	566	1976		0.0121531
0.08	344	377	390	1340	505	2956		0.0181805
0.07	378	1193	140	187	461	2359		0.0145087
0.06	410	1739	683	408	1750	4990		0.0306903
0.05	2992	1257	606	855	1532	7242		0.0445409
0.04	2047	1437	439	87	1639	5649		0.0347434
0.03	2845	83	707	837	1548	6020		0.0370252
0.02	3032	1306	1360	1812	3517	11027		0.0678201
0.01	5347	1620	1197	1993	1785	11942		0.0734476
-5.89806e-17	11637	1734	889	881	1030	16171		0.0994575
-0.01	2112	1057	2041	100	1130	6440		0.0396083
-0.02	3234	785	1756	1014	1395	8184		0.0503346
-0.03	1686	888	1374	230	202	4380		0.0269386
-0.04	2574	539	868	140	2161	6282		0.0386366
-0.05	2571	191	1286	815	423	5286		0.0325108
-0.06	179	848	793	498	194	2512		0.0154497
-0.07	490	588	839	439	10	2366		0.0145518
-0.08	272	2521		833	171	3797		0.0233529
-0.09	0	20		2869	469	3358		0.0206529
-0.1	155	578		7852	173	8758		0.0538649
-0.11		419		3526	93	4038		0.0248352
-0.12		223		1939	292	2454		0.015093
-0.13				2414	592	3006		0.018488
-0.14				622	2861	3483		0.0214217
-0.15				1599	441	2040		0.0125467
-0.16				449	475	924		0.00568294
-0.17				5	16	21		0.000129158
-0.18				280	0	280		0.0017221
-0.19					839	839		0.00516016
						162592
