# Supplementary material for: Interaction Wave Functions and Interaction-Based Coherence and Entanglement in Complex Adaptive Systems
Source: Research Square preprint supplement (doi:10.21203/rs.3.rs-6846233/v1), 2025-06-16
Supplement: Supplementary file 319 [file 30623.xls]

## Sheet: Sheet1
12.12	48	581.76	0.00108915		0.12
12.11	210	2543.1	0.00476504		0.11
12.1	1430	17303	0.0324476		0.1
12.09	78	943.02	0.00176987		0.09
12.08	344	4155.52	0.00780559		0.08
12.07	378	4562.46	0.00857707		0.07
12.06	410	4944.6	0.00930317		0.06
12.05	2992	36053.6	0.0678904		0.05
12.04	2047	24645.9	0.0464478		0.04
12.03	2845	34225.4	0.0645549		0.03
12.02	3032	36444.6	0.0687981		0.02
12.01	5347	64217.5	0.121327		0.01
12	11637	139644	0.264051		0
11.99	2112	25322.9	0.0479227		-0.01
11.98	3234	38743.3	0.0733816		-0.02
11.97	1686	20181.4	0.0382564		-0.03
11.96	2574	30785	0.0584058		-0.04
11.95	2571	30723.5	0.0583377		-0.05
11.94	179	2137.26	0.00406163		-0.06
11.93	490	5845.7	0.0111184		-0.07
11.92	272	3242.24	0.00617186		-0.08
11.91	0	0	0		-0.09
11.9	155	1844.5	0.00351705		-0.1
	44071	12.0054
