# Supplementary material for: Interaction Wave Functions and Interaction-Based Coherence and Entanglement in Complex Adaptive Systems
Source: Research Square preprint supplement (doi:10.21203/rs.3.rs-6846233/v1), 2025-06-16
Supplement: Supplementary file 320 [file 30624.xls]

## Sheet: Sheet1
12.17	231	2811.27	0.0117653		0.09
12.16	377	4584.32	0.0192014		0.08
12.15	1193	14495	0.0607619		0.07
12.14	1739	21111.5	0.0885708		0.06
12.13	1257	15247.4	0.0640216		0.05
12.12	1437	17416.4	0.0731894		0.04
12.11	83	1005.13	0.00422736		0.03
12.1	1306	15802.6	0.0665173		0.02
12.09	1620	19585.8	0.0825099		0.01
12.08	1734	20946.7	0.0883162		0
12.07	1057	12758	0.0538352		-0.01
12.06	785	9467.1	0.0399817		-0.02
12.05	888	10700.4	0.0452277		-0.03
12.04	539	6489.56	0.0274524		-0.04
12.03	191	2297.73	0.00972802		-0.05
12.02	848	10193	0.0431904		-0.06
12.01	588	7061.88	0.029948		-0.07
12	2521	30252	0.1284		-0.08
11.99	20	239.8	0.00101864		-0.09
11.98	578	6924.44	0.0294387		-0.1
11.97	419	5015.43	0.0213405		-0.11
11.96	223	2667.08	0.0113578		-0.12
	19634	12.0746
