# Supplementary material for: Interaction Wave Functions and Interaction-Based Coherence and Entanglement in Complex Adaptive Systems
Source: Research Square preprint supplement (doi:10.21203/rs.3.rs-6846233/v1), 2025-06-16
Supplement: Supplementary file 321 [file 30625.xls]

## Sheet: Sheet1
12.18	188	2289.84	0.0116661		0.11
12.17	217	2640.89	0.0134657		0.1
12.16	342	4158.72	0.0212225		0.09
12.15	390	4738.5	0.0242011		0.08
12.14	140	1699.6	0.00868756		0.07
12.13	683	8284.79	0.0423829		0.06
12.12	606	7344.72	0.0376047		0.05
12.11	439	5316.29	0.0272417		0.04
12.1	707	8554.7	0.0438722		0.03
12.09	1360	16442.4	0.0843934		0.02
12.08	1197	14459.8	0.0742786		0.01
12.07	889	10730.2	0.055166		0
12.06	2041	24614.5	0.126652		-0.01
12.05	1756	21159.8	0.108967		-0.02
12.04	1374	16543	0.0852622		-0.03
12.03	868	10442	0.0538629		-0.04
12.02	1286	15457.7	0.0798014		-0.05
12.01	793	9523.93	0.0492088		-0.06
12	839	10068	0.0520633		-0.07
	16115	12.0676
