# Supplementary material for: Interaction Wave Functions and Interaction-Based Coherence and Entanglement in Complex Adaptive Systems
Source: Research Square preprint supplement (doi:10.21203/rs.3.rs-6846233/v1), 2025-06-16
Supplement: Supplementary file 322 [file 30626.xls]

## Sheet: Sheet1
12.13	12	145.56	0.000224719		0.23
12.12	679	8229.48	0.0127154		0.22
12.11	108	1307.88	0.00202247		0.21
12.1	1406	17012.6	0.0263296		0.2
12.09	216	2611.44	0.00404494		0.19
12.08	663	8009.04	0.0124157		0.18
12.07	118	1424.26	0.00220974		0.17
12.06	492	5933.52	0.00921348		0.16
12.05	581	7001.05	0.0108801		0.15
12.04	542	6525.68	0.0101498		0.14
12.03	3161	38026.8	0.0591948		0.13
12.02	2511	30182.2	0.0470225		0.12
12.01	904	10857	0.0169288		0.11
12	7224	86688	0.135281		0.1
11.99	759	9100.41	0.0142135		0.09
11.98	1340	16053.2	0.0250936		0.08
11.97	187	2238.39	0.00350187		0.07
11.96	408	4879.68	0.00764045		0.06
11.95	855	10217.3	0.0160112		0.05
11.94	87	1038.78	0.00162921		0.04
11.93	837	9985.41	0.0156742		0.03
11.92	1812	21599	0.0339326		0.02
11.91	1993	23736.6	0.0373221		0.01
11.9	881	10483.9	0.0164981		0
11.89	100	1189	0.00187266		-0.01
11.88	1014	12046.3	0.0189888		-0.02
11.87	230	2730.1	0.00430712		-0.03
11.86	140	1660.4	0.00262172		-0.04
11.85	815	9657.75	0.0152622		-0.05
11.84	498	5896.32	0.00932584		-0.06
11.83	439	5193.37	0.00822097		-0.07
11.82	833	9846.06	0.0155993		-0.08
11.81	2869	33882.9	0.0537266		-0.09
11.8	7852	92653.6	0.147041		-0.1
11.79	3526	41571.5	0.06603		-0.11
11.78	1939	22841.4	0.0363109		-0.12
11.77	2414	28412.8	0.045206		-0.13
11.76	622	7314.72	0.0116479		-0.14
11.75	1599	18788.3	0.0299438		-0.15
11.74	449	5271.26	0.00840824		-0.16
11.73	5	58.65	9.3633e-05		-0.17
11.72	280	3281.6	0.00524345		-0.18
	53400	11.9023
