# Supplementary material for: Interaction Wave Functions and Interaction-Based Coherence and Entanglement in Complex Adaptive Systems
Source: Research Square preprint supplement (doi:10.21203/rs.3.rs-6846233/v1), 2025-06-16
Supplement: Supplementary file 323 [file 30627.xls]

## Sheet: Sheet1
12.2	1334	16274.8	0.0454174		0.16
12.19	343	4181.17	0.0116778		0.15
12.18	316	3848.88	0.0107585		0.14
12.17	0	0	0		0.13
12.16	42	510.72	0.00142993		0.12
12.15	320	3888	0.0108947		0.11
12.14	747	9068.58	0.0254324		0.1
12.13	566	6865.58	0.0192701		0.09
12.12	505	6120.6	0.0171932		0.08
12.11	461	5582.71	0.0156952		0.07
12.1	1750	21175	0.0595806		0.06
12.09	1532	18521.9	0.0521585		0.05
12.08	1639	19799.1	0.0558014		0.04
12.07	1548	18684.4	0.0527033		0.03
12.06	3517	42415	0.11974		0.02
12.05	1785	21509.3	0.0607722		0.01
12.04	1030	12401.2	0.0350674		0
12.03	1130	13593.9	0.038472		-0.01
12.02	1395	16767.9	0.0474942		-0.02
12.01	202	2426.02	0.0068773		-0.03
12	2161	25932	0.0735735		-0.04
11.99	423	5071.77	0.0144015		-0.05
11.98	194	2324.12	0.00660493		-0.06
11.97	10	119.7	0.00034046		-0.07
11.96	171	2045.16	0.00582187		-0.08
11.95	469	5604.55	0.0159676		-0.09
11.94	173	2065.62	0.00588996		-0.1
11.93	93	1109.49	0.00316628		-0.11
11.92	292	3480.64	0.00994144		-0.12
11.91	592	7050.72	0.0201552		-0.13
11.9	2861	34045.9	0.0974057		-0.14
11.89	441	5243.49	0.0150143		-0.15
11.88	475	5643	0.0161719		-0.16
11.87	16	189.92	0.000544736		-0.17
11.86	0	0	0		-0.18
11.85	839	9942.15	0.0285646		-0.19
	29372	12.0354
