# Supplementary material for: Interaction Wave Functions and Interaction-Based Coherence and Entanglement in Complex Adaptive Systems
Source: Research Square preprint supplement (doi:10.21203/rs.3.rs-6846233/v1), 2025-06-16
Supplement: Supplementary file 324 [file 30630.xls]

## Sheet: Sheet1
12.08	203	2452.24	0.0070984		0.19
12.07	0	0	0		0.18
12.06	52	627.12	0.00181831		0.17
12.05	255	3072.75	0.00891671		0.16
12.04	25	301	0.000874187		0.15
12.03	45	541.35	0.00157354		0.14
12.02	12	144.24	0.00041961		0.13
12.01	277	3326.77	0.00968599		0.12
12	3515	42180	0.122911		0.11
11.99	91	1091.09	0.00318204		0.1
11.98	468	5606.64	0.0163648		0.09
11.97	343	4105.71	0.0119938		0.08
11.96	1591	19028.4	0.0556333		0.07
11.95	650	7767.5	0.0227289		0.06
11.94	503	6005.82	0.0175886		0.05
11.93	1617	19290.8	0.0565424		0.04
11.92	1025	12218	0.0358417		0.03
11.91	477	5681.07	0.0166795		0.02
11.9	4835	57536.5	0.169068		0.01
11.89	968	11509.5	0.0338485		0
11.88	64	760.32	0.00223792		-0.01
11.87	1092	12962	0.0381845		-0.02
11.86	1455	17256.3	0.0508777		-0.03
11.85	781	9254.85	0.0273096		-0.04
11.84	205	2427.2	0.00716833		-0.05
11.83	194	2295.02	0.00678369		-0.06
11.82	139	1642.98	0.00486048		-0.07
11.81	764	9022.84	0.0267152		-0.08
11.8	624	7363.2	0.0218197		-0.09
11.79	195	2299.05	0.00681866		-0.1
11.78	1525	17964.5	0.0533254		-0.11
11.77	291	3425.07	0.0101755		-0.12
11.76	2547	29952.7	0.0890622		-0.13
11.75	1757	20644.8	0.0614379		-0.14
11.74	13	152.62	0.000454577		-0.15
	28598	11.8858
