# Supplementary material for: Interaction Wave Functions and Interaction-Based Coherence and Entanglement in Complex Adaptive Systems
Source: Research Square preprint supplement (doi:10.21203/rs.3.rs-6846233/v1), 2025-06-16
Supplement: Supplementary file 325 [file 30602-06.xls]

## Sheet: Sheet1
0.15			3158			3158	473.7	0.00259155
0.14			4826			4826	675.64	0.00396036
0.13			22312			22312	2900.56	0.0183099
0.12			16829			16829	2019.48	0.0138104
0.11			5411			5411	595.21	0.00444043
0.1			4054	903		4957	495.7	0.00406786
0.09			5110	9039		14149	1273.41	0.0116111
0.08			2805	5923	1138	9866	789.28	0.00809633
0.07			12854	8025	1943	22822	1597.54	0.0187284
0.06		463	38422	11416	762	51063	3063.78	0.0419038
0.05	899	4442	17872	14809	2095	40117	2005.85	0.0329212
0.04	623	13753	33662	19912	6052	74002	2960.08	0.0607282
0.03	2494	7547	67327	12413	24357	114138	3424.14	0.093665
0.02	2607	17254	38624	12580	24223	95288	1905.76	0.0781961
0.01	8292	26118	14689	9952	24049	83100	831	0.0681943
0	21330	11713	14307	10107	34805	92262	0	0.0757129
-0.01	33089	6602	16374	28893	63099	148057	-1480.57	0.1215
-0.02	12164	4931	23593	12922	57849	111459	-2229.18	0.0914665
-0.03	100	18995	28992	19018	27982	95087	-2852.61	0.0780312
-0.04		6464	24877	15882		47223	-1888.92	0.0387526
-0.05			10528	36581		47109	-2355.45	0.038659
-0.06			15636	7901		23537	-1412.22	0.0193152
-0.07			12944			12944	-906.08	0.0106222
-0.08			8568			8568	-685.44	0.00703115
-0.09			13095			13095	-1178.55	0.0107461
-0.1			9632			9632	-963.2	0.0079043
-0.11			1516			1516	-166.76	0.00124407
-0.12			8309			8309	-997.08	0.00681861
-0.13			9593			9593	-1247.09	0.0078723
-0.14			7826			7826	-1095.64	0.00642224
-0.15			7077			7077	-1061.55	0.00580759
-0.16			13245			13245	-2119.2	0.0108692
						1218577	0.0019462
