# Supplementary material for: Interaction Wave Functions and Interaction-Based Coherence and Entanglement in Complex Adaptive Systems
Source: Research Square preprint supplement (doi:10.21203/rs.3.rs-6846233/v1), 2025-06-16
Supplement: Supplementary file 326 [file 30602.xls]

## Sheet: Sheet1
5.38	899	4836.62	0.0110174		0.05
5.37	623	3345.51	0.00763499		0.04
5.36	2494	13367.8	0.0305645		0.03
5.35	2607	13947.5	0.0319493		0.02
5.34	8292	44279.3	0.10162		0.01
5.33	21330	113689	0.261403		0
5.32	33089	176033	0.405512		-0.01
5.31	12164	64590.8	0.149072		-0.02
5.3	100	530	0.00122552		-0.03
	81598	5.32636
