# Supplementary material for: Interaction Wave Functions and Interaction-Based Coherence and Entanglement in Complex Adaptive Systems
Source: Research Square preprint supplement (doi:10.21203/rs.3.rs-6846233/v1), 2025-06-16
Supplement: Supplementary file 327 [file 30603.xls]

## Sheet: Sheet1
5.44	463	2518.72	0.00391437		0.06
5.43	4442	24120.1	0.0375543		0.05
5.42	13753	74541.3	0.116273		0.04
5.41	7547	40829.3	0.0638051		0.03
5.4	17254	93171.6	0.145872		0.02
5.39	26118	140776	0.220811		0.01
5.38	11713	63015.9	0.0990261		0
5.37	6602	35452.7	0.0558158		-0.01
5.36	4931	26430.2	0.0416885		-0.02
5.35	18995	101623	0.160591		-0.03
5.34	6464	34517.8	0.0546491		-0.04
	118282	5.38541
