# Supplementary material for: Interaction Wave Functions and Interaction-Based Coherence and Entanglement in Complex Adaptive Systems
Source: Research Square preprint supplement (doi:10.21203/rs.3.rs-6846233/v1), 2025-06-16
Supplement: Supplementary file 328 [file 30604.xls]

## Sheet: Sheet1
5.62	3158	17748	0.00614317		0.15
5.61	4826	27073.9	0.00938788		0.14
5.6	22312	124947	0.0434029		0.13
5.59	16829	94074.1	0.032737		0.12
5.58	5411	30193.4	0.0105259		0.11
5.57	4054	22580.8	0.00788613		0.1
5.56	5110	28411.6	0.00994034		0.09
5.55	2805	15567.8	0.00545649		0.08
5.54	12854	71211.2	0.0250045		0.07
5.53	38422	212474	0.0747412		0.06
5.52	17872	98653.4	0.0347659		0.05
5.51	33662	185478	0.0654817		0.04
5.5	67327	370299	0.130969		0.03
5.49	38624	212046	0.0751342		0.02
5.48	14689	80495.7	0.0285741		0.01
5.47	14307	78259.3	0.027831		0
5.46	16374	89402	0.0318519		-0.01
5.45	23593	128582	0.0458948		-0.02
5.44	28992	157716	0.0563973		-0.03
5.43	24877	135082	0.0483925		-0.04
5.42	10528	57061.8	0.0204798		-0.05
5.41	15636	84590.8	0.0304163		-0.06
5.4	12944	69897.6	0.0251796		-0.07
5.39	8568	46181.5	0.0166671		-0.08
5.38	13095	70451.1	0.0254733		-0.09
5.37	9632	51723.8	0.0187369		-0.1
5.36	1516	8125.76	0.00294903		-0.11
5.35	8309	44453.2	0.0161633		-0.12
5.34	9593	51226.6	0.018661		-0.13
5.33	7826	41712.6	0.0152237		-0.14
5.32	7077	37649.6	0.0137667		-0.15
5.31	13245	70331	0.0257651		-0.16
	514067	5.47341
