# Supplementary material for: Interaction Wave Functions and Interaction-Based Coherence and Entanglement in Complex Adaptive Systems
Source: Research Square preprint supplement (doi:10.21203/rs.3.rs-6846233/v1), 2025-06-16
Supplement: Supplementary file 329 [file 30605.xls]

## Sheet: Sheet1
5.51	903	4975.53	0.0038218		0.1
5.5	9039	49714.5	0.0382561		0.09
5.49	5923	32517.3	0.0250681		0.08
5.48	8025	43977	0.0339645		0.07
5.47	11416	62445.5	0.0483164		0.06
5.46	14809	80857.1	0.0626767		0.05
5.45	19912	108520	0.0842743		0.04
5.44	12413	67526.7	0.052536		0.03
5.43	12580	68309.4	0.0532428		0.02
5.42	9952	53939.8	0.0421202		0.01
5.41	10107	54678.9	0.0427762		0
5.4	28893	156022	0.122285		-0.01
5.39	12922	69649.6	0.0546903		-0.02
5.38	19018	102317	0.0804906		-0.03
5.37	15882	85286.3	0.067218		-0.04
5.36	36581	196074	0.154823		-0.05
5.35	7901	42270.4	0.0334397		-0.06
	236276	5.41351
