# Supplementary material for: Interaction Wave Functions and Interaction-Based Coherence and Entanglement in Complex Adaptive Systems
Source: Research Square preprint supplement (doi:10.21203/rs.3.rs-6846233/v1), 2025-06-16
Supplement: Supplementary file 330 [file 30606.xls]

## Sheet: Sheet1
5.4	1138	6145.2	0.00424067		0.08
5.39	1943	10472.8	0.00724044		0.07
5.38	762	4099.56	0.00283953		0.06
5.37	2095	11250.2	0.00780685		0.05
5.36	6052	32438.7	0.0225523		0.04
5.35	24357	130310	0.0907644		0.03
5.34	24223	129351	0.0902651		0.02
5.33	24049	128181	0.0896167		0.01
5.32	34805	185163	0.129698		0
5.31	63099	335056	0.235133		-0.01
5.3	57849	306600	0.21557		-0.02
5.29	27982	148025	0.104273		-0.03
	268354	5.31794
