# Supplementary material for: Interaction Wave Functions and Interaction-Based Coherence and Entanglement in Complex Adaptive Systems
Source: Research Square preprint supplement (doi:10.21203/rs.3.rs-6846233/v1), 2025-06-16
Supplement: Supplementary file 331 [file 30609-13.xls]

## Sheet: Sheet1
0.08	3532					3532	282.56	0.00287164
0.07	3993					3993	279.51	0.00324644
0.06	692				29069	29761	1785.66	0.0241967
0.05	1588		2784		12454	16826	841.3	0.0136801
0.04	17715		23159		33584	74458	2978.32	0.0605369
0.03	11212	1985	25164	3644	43731	85736	2572.08	0.0697063
0.02	20688	22552	62213	13788	63549	182790	3655.8	0.148614
0.01	14204	8974	43307	18150	50607	135242	1352.42	0.109956
0	22339	17233	69186	16069	26254	151081	0	0.122834
-0.01	22656	13468	76985	30881	53873	197863	-1978.63	0.160869
-0.02	45973	6648	14739	18713	62524	148597	-2971.94	0.120814
-0.03	21681	561	14775	6957	53888	97862	-2935.86	0.0795651
-0.04	7471		28443		35159	71073	-2842.92	0.0577848
-0.05	309		6614		1691	8614	-430.7	0.00700347
-0.06			17363			17363	-1041.78	0.0141167
-0.07			5170			5170	-361.9	0.00420339
						1229961	0.000962567
