# Supplementary material for: Interaction Wave Functions and Interaction-Based Coherence and Entanglement in Complex Adaptive Systems
Source: Research Square preprint supplement (doi:10.21203/rs.3.rs-6846233/v1), 2025-06-16
Supplement: Supplementary file 332 [file 30609.xls]

## Sheet: Sheet1
5.41	3532	19108.1	0.0182012		0.08
5.4	3993	21562.2	0.0205769		0.07
5.39	692	3729.88	0.00356604		0.06
5.38	1588	8543.44	0.00818333		0.05
5.37	17715	95129.6	0.0912895		0.04
5.36	11212	60096.3	0.057778		0.03
5.35	20688	110681	0.10661		0.02
5.34	14204	75849.4	0.0731965		0.01
5.33	22339	119067	0.115118		0
5.32	22656	120530	0.116752		-0.01
5.31	45973	244117	0.23691		-0.02
5.3	21681	114909	0.111727		-0.03
5.29	7471	39521.6	0.0384998		-0.04
5.28	309	1631.52	0.00159235		-0.05
	194053	5.33089
