# Supplementary material for: Interaction Wave Functions and Interaction-Based Coherence and Entanglement in Complex Adaptive Systems
Source: Research Square preprint supplement (doi:10.21203/rs.3.rs-6846233/v1), 2025-06-16
Supplement: Supplementary file 333 [file 30610.xls]

## Sheet: Sheet1
5.39	1985	10699.1	0.0277929		0.03
5.38	22552	121330	0.315761		0.02
5.37	8974	48190.4	0.125649		0.01
5.36	17233	92368.9	0.241288		0
5.35	13468	72053.8	0.188572		-0.01
5.34	6648	35500.3	0.0930819		-0.02
5.33	561	2990.13	0.00785483		-0.03
	71421	5.36442
