# Supplementary material for: Interaction Wave Functions and Interaction-Based Coherence and Entanglement in Complex Adaptive Systems
Source: Research Square preprint supplement (doi:10.21203/rs.3.rs-6846233/v1), 2025-06-16
Supplement: Supplementary file 334 [file 30611.xls]

## Sheet: Sheet1
5.51	2784	15339.8	0.00714026		0.05
5.5	23159	127374	0.059397		0.04
5.49	25164	138150	0.0645393		0.03
5.48	62213	340927	0.159561		0.02
5.47	43307	236889	0.111072		0.01
5.46	69186	377756	0.177445		0
5.45	76985	419568	0.197447		-0.01
5.44	14739	80180.2	0.0378018		-0.02
5.43	14775	80228.3	0.0378941		-0.03
5.42	28443	154161	0.0729491		-0.04
5.41	6614	35781.7	0.0169632		-0.05
5.4	17363	93760.2	0.0445317		-0.06
5.39	5170	27866.3	0.0132597		-0.07
	389902	5.45774
