# Supplementary material for: Interaction Wave Functions and Interaction-Based Coherence and Entanglement in Complex Adaptive Systems
Source: Research Square preprint supplement (doi:10.21203/rs.3.rs-6846233/v1), 2025-06-16
Supplement: Supplementary file 335 [file 30612.xls]

## Sheet: Sheet1
5.5	3644	20042	0.0336778		0.03
5.49	13788	75696.1	0.127428		0.02
5.48	18150	99462	0.167742		0.01
5.47	16069	87897.4	0.148509		0
5.46	30881	168610	0.285401		-0.01
5.45	18713	101986	0.172945		-0.02
5.44	6957	37846.1	0.0642964		-0.03
	108202	5.46699
