# Supplementary material for: Interaction Wave Functions and Interaction-Based Coherence and Entanglement in Complex Adaptive Systems
Source: Research Square preprint supplement (doi:10.21203/rs.3.rs-6846233/v1), 2025-06-16
Supplement: Supplementary file 336 [file 30613.xls]

## Sheet: Sheet1
5.6	29069	162786	0.0623286		0.06
5.59	12454	69617.9	0.0267034		0.05
5.58	33584	187399	0.0720095		0.04
5.57	43731	243582	0.0937663		0.03
5.56	63549	353332	0.136259		0.02
5.55	50607	280869	0.10851		0.01
5.54	26254	145447	0.0562928		0
5.53	53873	297918	0.115512		-0.01
5.52	62524	345132	0.134061		-0.02
5.51	53888	296923	0.115545		-0.03
5.5	35159	193375	0.0753865		-0.04
5.49	1691	9283.59	0.00362578		-0.05
	466383	5.54408
