# Supplementary material for: Interaction Wave Functions and Interaction-Based Coherence and Entanglement in Complex Adaptive Systems
Source: Research Square preprint supplement (doi:10.21203/rs.3.rs-6846233/v1), 2025-06-16
Supplement: Supplementary file 337 [file 30616-20.xls]

## Sheet: Sheet1
0.1				963		963	96.3	0.00112187
0.09				5442		5442	489.78	0.00633979
0.08				1656		1656	132.48	0.0019292
0.07	261			3497		3758	263.06	0.00437797
0.06	6849			11490		18339	1100.34	0.0213645
0.05	11616			3009		14625	731.25	0.0170377
0.04	5009			17435	233	22677	907.08	0.0264181
0.03	6741	3858		7613	6667	24879	746.37	0.0289834
0.02	7380	12224	3589	11722	16519	51434	1028.68	0.0599193
0.01	11639	41914	31882	26166	22124	133725	1337.25	0.155786
0	41332	38822	65066	14789	14939	174948	0	0.20381
-0.01	112326	63320	42379	20775	3269	242069	-2420.69	0.282004
-0.02	15104	10135	16478	24576	7853	74146	-1482.92	0.0863782
-0.03	17805	9382	221	6989	6034	40431	-1212.93	0.0471011
-0.04	7581	2066		12027	6281	27955	-1118.2	0.0325669
-0.05		0		15552		15552	-777.6	0.0181177
-0.06		4700		1089		5789	-347.34	0.00674404
						858388	-0.000614046
