# Supplementary material for: Interaction Wave Functions and Interaction-Based Coherence and Entanglement in Complex Adaptive Systems
Source: Research Square preprint supplement (doi:10.21203/rs.3.rs-6846233/v1), 2025-06-16
Supplement: Supplementary file 338 [file 30616.xls]

## Sheet: Sheet1
5.58	261	1456.38	0.00107124		0.07
5.57	6849	38148.9	0.0281108		0.06
5.56	11616	64585	0.0476763		0.05
5.55	5009	27800	0.0205588		0.04
5.54	6741	37345.1	0.0276675		0.03
5.53	7380	40811.4	0.0302902		0.02
5.52	11639	64247.3	0.0477707		0.01
5.51	41332	227739	0.169642		0
5.5	112326	617793	0.461027		-0.01
5.49	15104	82921	0.0619923		-0.02
5.48	17805	97571.4	0.0730782		-0.03
5.47	7581	41468.1	0.0311152		-0.04
	243643	5.50759
