# Supplementary material for: Interaction Wave Functions and Interaction-Based Coherence and Entanglement in Complex Adaptive Systems
Source: Research Square preprint supplement (doi:10.21203/rs.3.rs-6846233/v1), 2025-06-16
Supplement: Supplementary file 339 [file 30617.xls]

## Sheet: Sheet1
5.54	3858	21373.3	0.0206951		0.03
5.53	12224	67598.7	0.065572		0.02
5.52	41914	231365	0.224835		0.01
5.51	38822	213909	0.208249		0
5.5	63320	348260	0.339661		-0.01
5.49	10135	55641.2	0.0543662		-0.02
5.48	9382	51413.4	0.0503269		-0.03
5.47	2066	11301	0.0110824		-0.04
5.46	0	0	0		-0.05
5.45	4700	25615	0.0252118		-0.06
	186421	5.50623
