# Supplementary material for: Interaction Wave Functions and Interaction-Based Coherence and Entanglement in Complex Adaptive Systems
Source: Research Square preprint supplement (doi:10.21203/rs.3.rs-6846233/v1), 2025-06-16
Supplement: Supplementary file 340 [file 30618.xls]

## Sheet: Sheet1
5.37	3589	19272.9	0.0224854		0.02
5.36	31882	170888	0.199743		0.01
5.35	65066	348103	0.407643		0
5.34	42379	226304	0.265508		-0.01
5.33	16478	87827.7	0.103236		-0.02
5.32	221	1175.72	0.00138458		-0.03
	159615	5.34769
