# Supplementary material for: Interaction Wave Functions and Interaction-Based Coherence and Entanglement in Complex Adaptive Systems
Source: Research Square preprint supplement (doi:10.21203/rs.3.rs-6846233/v1), 2025-06-16
Supplement: Supplementary file 341 [file 30619.xls]

## Sheet: Sheet1
5.34	963	5142.42	0.00521132		0.1
5.33	5442	29005.9	0.0294496		0.09
5.32	1656	8809.92	0.00896152		0.08
5.31	3497	18569.1	0.0189242		0.07
5.3	11490	60897	0.0621787		0.06
5.29	3009	15917.6	0.0162833		0.05
5.28	17435	92056.8	0.0943503		0.04
5.27	7613	40120.5	0.0411981		0.03
5.26	11722	61657.7	0.0634342		0.02
5.25	26166	137372	0.141599		0.01
5.24	14789	77494.4	0.0800314		0
5.23	20775	108653	0.112425		-0.01
5.22	24576	128287	0.132994		-0.02
5.21	6989	36412.7	0.0378213		-0.03
5.2	12027	62540.4	0.0650847		-0.04
5.19	15552	80714.9	0.0841604		-0.05
5.18	1089	5641.02	0.00589318		-0.06
	184790	5.24537
