# Supplementary material for: Interaction Wave Functions and Interaction-Based Coherence and Entanglement in Complex Adaptive Systems
Source: Research Square preprint supplement (doi:10.21203/rs.3.rs-6846233/v1), 2025-06-16
Supplement: Supplementary file 342 [file 30620.xls]

## Sheet: Sheet1
5.26	233	1225.58	0.00277649		0.04
5.25	6667	35001.8	0.0794457		0.03
5.24	16519	86559.6	0.196845		0.02
5.23	22124	115709	0.263635		0.01
5.22	14939	77981.6	0.178017		0
5.21	3269	17031.5	0.0389542		-0.01
5.2	7853	40835.6	0.0935783		-0.02
5.19	6034	31316.5	0.0719027		-0.03
5.18	6281	32535.6	0.074846		-0.04
	83919	5.22166
