# Supplementary material for: Interaction Wave Functions and Interaction-Based Coherence and Entanglement in Complex Adaptive Systems
Source: Research Square preprint supplement (doi:10.21203/rs.3.rs-6846233/v1), 2025-06-16
Supplement: Supplementary file 343 [file 30623-27.xls]

## Sheet: Sheet1
0.08					157	157		0.000189954
0.07					331	331		0.000400475
0.06					2219	2219		0.00268476
0.05				17093	827	17920		0.0216813
0.04				9531	4631	14162		0.0171345
0.03	1333		1848	26464	3756	33401		0.0404117
0.02	7301	731	35004	24212	13169	80417		0.0972961
0.01	23602	41343	29199	27063	8633	129840		0.157093
0	73150	75255	25820	45223	12834	232282		0.281037
-0.01	62790	25129	14046	15745	56634	174344		0.210938
-0.02	2242	11504	11465	20087	6840	52138		0.0630815
-0.03		10	4730	29670		34410		0.0416325
-0.04				33900		33900		0.0410154
-0.05				15105		15105		0.0182755
-0.06				5892		5892		0.0071287
						826518
