# Supplementary material for: Interaction Wave Functions and Interaction-Based Coherence and Entanglement in Complex Adaptive Systems
Source: Research Square preprint supplement (doi:10.21203/rs.3.rs-6846233/v1), 2025-06-16
Supplement: Supplementary file 344 [file 30623.xls]

## Sheet: Sheet1
5.22	1333	6958.26	0.00782194		0.03
5.21	7301	38038.2	0.0428417		0.02
5.2	23602	122730	0.138495		0.01
5.19	73150	379648	0.429239		0
5.18	62790	325252	0.368447		-0.01
5.17	2242	11591.1	0.0131559		-0.02
	170418	5.18853
