# Supplementary material for: Interaction Wave Functions and Interaction-Based Coherence and Entanglement in Complex Adaptive Systems
Source: Research Square preprint supplement (doi:10.21203/rs.3.rs-6846233/v1), 2025-06-16
Supplement: Supplementary file 345 [file 30624.xls]

## Sheet: Sheet1
5.21	731	3808.51	0.00474762		0.02
5.2	41343	214984	0.26851		0.01
5.19	75255	390573	0.488758		0
5.18	25129	130168	0.163205		-0.01
5.17	11504	59475.7	0.0747149		-0.02
5.16	10	51.6	6.49469e-05		-0.03
	153972	5.18965
