# Supplementary material for: Interaction Wave Functions and Interaction-Based Coherence and Entanglement in Complex Adaptive Systems
Source: Research Square preprint supplement (doi:10.21203/rs.3.rs-6846233/v1), 2025-06-16
Supplement: Supplementary file 346 [file 30625.xls]

## Sheet: Sheet1
5.21	1848	9628.08	0.0151336		0.03
5.2	35004	182021	0.286655		0.02
5.19	29199	151543	0.239117		0.01
5.18	25820	133748	0.211445		0
5.17	14046	72617.8	0.115026		-0.01
5.16	11465	59159.4	0.0938892		-0.02
5.15	4730	24359.5	0.0387349		-0.03
	122112	5.18439
