# Supplementary material for: Interaction Wave Functions and Interaction-Based Coherence and Entanglement in Complex Adaptive Systems
Source: Research Square preprint supplement (doi:10.21203/rs.3.rs-6846233/v1), 2025-06-16
Supplement: Supplementary file 347 [file 30626.xls]

## Sheet: Sheet1
5.2	17093	88883.6	0.0633109		0.05
5.19	9531	49465.9	0.035302		0.04
5.18	26464	137084	0.0980203		0.03
5.17	24212	125176	0.0896791		0.02
5.16	27063	139645	0.100239		0.01
5.15	45223	232898	0.167502		0
5.14	15745	80929.3	0.0583181		-0.01
5.13	20087	103046	0.0744004		-0.02
5.12	29670	151910	0.109895		-0.03
5.11	33900	173229	0.125563		-0.04
5.1	15105	77035.5	0.0559476		-0.05
5.09	5892	29990.3	0.0218234		-0.06
	269985	5.14582
