# Supplementary material for: Interaction Wave Functions and Interaction-Based Coherence and Entanglement in Complex Adaptive Systems
Source: Research Square preprint supplement (doi:10.21203/rs.3.rs-6846233/v1), 2025-06-16
Supplement: Supplementary file 348 [file 30627.xls]

## Sheet: Sheet1
5.19	157	814.83	0.00142687		0.08
5.18	331	1714.58	0.00300824		0.07
5.17	2219	11472.2	0.020167		0.06
5.16	827	4267.32	0.00751606		0.05
5.15	4631	23849.7	0.0420881		0.04
5.14	3756	19305.8	0.0341358		0.03
5.13	13169	67557	0.119684		0.02
5.12	8633	44201	0.0784597		0.01
5.11	12834	65581.7	0.11664		0
5.1	56634	288833	0.514709		-0.01
5.09	6840	34815.6	0.0621643		-0.02
	110031	5.11141
