# Supplementary material for: Interaction Wave Functions and Interaction-Based Coherence and Entanglement in Complex Adaptive Systems
Source: Research Square preprint supplement (doi:10.21203/rs.3.rs-6846233/v1), 2025-06-16
Supplement: Supplementary file 349 [file 30630.xls]

## Sheet: Sheet1
5.14	9	46.26	0.000107286		0.04
5.13	4624	23721.1	0.0551211		0.03
5.12	5034	25774.1	0.0600086		0.02
5.11	18932	96742.5	0.225682		0.01
5.1	27609	140806	0.329117		0
5.09	22498	114515	0.268191		-0.01
5.08	5182	26324.6	0.0617728		-0.02
	83888	5.1012
