# Supplementary material for: Interaction Wave Functions and Interaction-Based Coherence and Entanglement in Complex Adaptive Systems
Source: Research Square preprint supplement (doi:10.21203/rs.3.rs-6846233/v1), 2025-06-16
Supplement: Supplementary file 350 [file 30602-06.xls]

## Sheet: Sheet1
0.07			3595			3595	251.65	0.00192382
0.06		19	47563			47582	2854.92	0.025463
0.05		6462	32356			38818	1940.9	0.020773
0.04	845	13562	60199	15275	5389	95270	3810.8	0.0509826
0.03	5022	11246	56514	56270	75020	204072	6122.16	0.109207
0.02	22201	31714	43001	45058	70493	212467	4249.34	0.113699
0.01	32945	27102	46949	62769	40532	210297	2102.97	0.112538
0	86532	38964	15174	149173	47608	337451	0	0.180583
-0.01	22281	17877	2815	117820	54252	215045	-2150.45	0.115079
-0.02		41445	2792	55076	64646	163959	-3279.18	0.0877408
-0.03		2491	20418	15350	50727	88986	-2669.58	0.0476198
-0.04			39443	20556	16663	76662	-3066.48	0.0410248
-0.05			26886	24444		51330	-2566.5	0.0274687
-0.06			30199	22373		52572	-3154.32	0.0281333
-0.07			29033	10190		39223	-2745.61	0.0209897
-0.08			31039			31039	-2483.12	0.0166102
-0.09			307			307	-27.63	0.000164288
						1868675	-0.000433532
