# Supplementary material for: Interaction Wave Functions and Interaction-Based Coherence and Entanglement in Complex Adaptive Systems
Source: Research Square preprint supplement (doi:10.21203/rs.3.rs-6846233/v1), 2025-06-16
Supplement: Supplementary file 351 [file 30602.xls]

## Sheet: Sheet1
3.83	845	3236.35	0.00497568		0.04
3.82	5022	19184	0.0295714		0.03
3.81	22201	84585.8	0.130728		0.02
3.8	32945	125191	0.193993		0.01
3.79	86532	327956	0.509533		0
3.78	22281	84222.2	0.131199		-0.01
	169826	3.79433
