# Supplementary material for: Interaction Wave Functions and Interaction-Based Coherence and Entanglement in Complex Adaptive Systems
Source: Research Square preprint supplement (doi:10.21203/rs.3.rs-6846233/v1), 2025-06-16
Supplement: Supplementary file 352 [file 30603.xls]

## Sheet: Sheet1
3.86	19	73.34	9.95379e-05		0.06
3.85	6462	24878.7	0.0338534		0.05
3.84	13562	52078.1	0.0710491		0.04
3.83	11246	43072.2	0.058916		0.03
3.82	31714	121147	0.166145		0.02
3.81	27102	103259	0.141983		0.01
3.8	38964	148063	0.204126		0
3.79	17877	67753.8	0.0936547		-0.01
3.78	41445	156662	0.217124		-0.02
3.77	2491	9391.07	0.0130499		-0.03
	190882	3.80538
