# Supplementary material for: Interaction Wave Functions and Interaction-Based Coherence and Entanglement in Complex Adaptive Systems
Source: Research Square preprint supplement (doi:10.21203/rs.3.rs-6846233/v1), 2025-06-16
Supplement: Supplementary file 353 [file 30604.xls]

## Sheet: Sheet1
3.9	3595	14020.5	0.00736253		0.07
3.89	47563	185020	0.0974087		0.06
3.88	32356	125541	0.0662649		0.05
3.87	60199	232970	0.123287		0.04
3.86	56514	218144	0.11574		0.03
3.85	43001	165554	0.0880657		0.02
3.84	46949	180284	0.0961512		0.01
3.83	15174	58116.4	0.0310762		0
3.82	2815	10753.3	0.0057651		-0.01
3.81	2792	10637.5	0.005718		-0.02
3.8	20418	77588.4	0.0418159		-0.03
3.79	39443	149489	0.080779		-0.04
3.78	26886	101629	0.0550623		-0.05
3.77	30199	113850	0.0618473		-0.06
3.76	29033	109164	0.0594594		-0.07
3.75	31039	116396	0.0635676		-0.08
3.74	307	1148.18	0.000628734		-0.09
	488283	3.83037
