# Supplementary material for: Interaction Wave Functions and Interaction-Based Coherence and Entanglement in Complex Adaptive Systems
Source: Research Square preprint supplement (doi:10.21203/rs.3.rs-6846233/v1), 2025-06-16
Supplement: Supplementary file 354 [file 30605.xls]

## Sheet: Sheet1
3.94	15275	60183.5	0.0257002		0.04
3.93	56270	221141	0.0946742		0.03
3.92	45058	176627	0.07581		0.02
3.91	62769	245427	0.105609		0.01
3.9	149173	581775	0.250983		0
3.89	117820	458320	0.198232		-0.01
3.88	55076	213695	0.0926653		-0.02
3.87	15350	59404.5	0.0258264		-0.03
3.86	20556	79346.2	0.0345854		-0.04
3.85	24444	94109.4	0.041127		-0.05
3.84	22373	85912.3	0.0376425		-0.06
3.83	10190	39027.7	0.0171447		-0.07
	594354	3.89493
