# Supplementary material for: Interaction Wave Functions and Interaction-Based Coherence and Entanglement in Complex Adaptive Systems
Source: Research Square preprint supplement (doi:10.21203/rs.3.rs-6846233/v1), 2025-06-16
Supplement: Supplementary file 355 [file 30606.xls]

## Sheet: Sheet1
3.9	5389	21017.1	0.0126702		0.04
3.89	75020	291828	0.176381		0.03
3.88	70493	273513	0.165737		0.02
3.87	40532	156859	0.0952954		0.01
3.86	47608	183767	0.111932		0
3.85	54252	208870	0.127553		-0.01
3.84	64646	248241	0.15199		-0.02
3.83	50727	194284	0.119265		-0.03
3.82	16663	63652.7	0.0391766		-0.04
	425330	3.86061
