# Supplementary material for: Interaction Wave Functions and Interaction-Based Coherence and Entanglement in Complex Adaptive Systems
Source: Research Square preprint supplement (doi:10.21203/rs.3.rs-6846233/v1), 2025-06-16
Supplement: Supplementary file 356 [file 30609-13.xls]

## Sheet: Sheet1
0.06	40525					40525	2431.5	0.00741766
0.05	62053		19066			81119	4055.95	0.0148479
0.04	74135		91514			165649	6625.96	0.0303202
0.03	201662		293347	28093		523102	15693.1	0.0957481
0.02	261665		625294	67084	48040	1002083	20041.7	0.18342
0.01	277644		310521	101082	199123	888370	8883.7	0.162606
0	265427		159275	133865	210460	769027	0	0.140762
-0.01	132758		188640	277261	146230	744889	-7448.89	0.136344
-0.02	71751		140800	76518	39213	328282	-6565.64	0.0600884
-0.03	98471		239399	49501		387371	-11621.1	0.070904
-0.04	78472		165092			243564	-9742.56	0.0445817
-0.05	53223		105323			158546	-7927.3	0.0290201
-0.06	24626		87739			112365	-6741.9	0.0205672
-0.07	5272		1273			6545	-458.15	0.00119799
-0.08	9224					9224	-737.92	0.00168835
-0.09	0					0	0	0
-0.1	2653					2653	-265.3	0.000485603
						5463314	0.00113906
