# Supplementary material for: Interaction Wave Functions and Interaction-Based Coherence and Entanglement in Complex Adaptive Systems
Source: Research Square preprint supplement (doi:10.21203/rs.3.rs-6846233/v1), 2025-06-16
Supplement: Supplementary file 357 [file 30609.xls]

## Sheet: Sheet1
4.02	40525	162910	0.0244191		0.06
4.01	62053	248833	0.0373912		0.05
4	74135	296540	0.0446715		0.04
3.99	201662	804631	0.121515		0.03
3.98	261665	1.04143e+06	0.157671		0.02
3.97	277644	1.10225e+06	0.1673		0.01
3.96	265427	1.05109e+06	0.159938		0
3.95	132758	524394	0.0799959		-0.01
3.94	71751	282699	0.0432349		-0.02
3.93	98471	386991	0.0593356		-0.03
3.92	78472	307610	0.0472848		-0.04
3.91	53223	208102	0.0320705		-0.05
3.9	24626	96041.4	0.0148389		-0.06
3.89	5272	20508.1	0.00317674		-0.07
3.88	9224	35789.1	0.0055581		-0.08
3.87	0	0	0		-0.09
3.86	2653	10240.6	0.00159862		-0.1
	1659561	3.96494
