# Supplementary material for: Interaction Wave Functions and Interaction-Based Coherence and Entanglement in Complex Adaptive Systems
Source: Research Square preprint supplement (doi:10.21203/rs.3.rs-6846233/v1), 2025-06-16
Supplement: Supplementary file 358 [file 30611.xls]

## Sheet: Sheet1
4.08	19066	77789.3	0.00785487		0.05
4.07	91514	372462	0.0377022		0.04
4.06	293347	1.19099e+06	0.120854		0.03
4.05	625294	2.53244e+06	0.257611		0.02
4.04	310521	1.2545e+06	0.127929		0.01
4.03	159275	641878	0.0656186		0
4.02	188640	758333	0.0777165		-0.01
4.01	140800	564608	0.0580072		-0.02
4	239399	957596	0.0986284		-0.03
3.99	165092	658717	0.0680151		-0.04
3.98	105323	419186	0.0433913		-0.05
3.97	87739	348324	0.036147		-0.06
3.96	1273	5041.08	0.000524455		-0.07
	2427283	4.02997
