# Supplementary material for: Interaction Wave Functions and Interaction-Based Coherence and Entanglement in Complex Adaptive Systems
Source: Research Square preprint supplement (doi:10.21203/rs.3.rs-6846233/v1), 2025-06-16
Supplement: Supplementary file 359 [file 30612.xls]

## Sheet: Sheet1
4.06	28093	114058	0.0383049		0.03
4.05	67084	271690	0.0914694		0.02
4.04	101082	408371	0.137826		0.01
4.03	133865	539476	0.182526		0
4.02	277261	1.11459e+06	0.378047		-0.01
4.01	76518	306837	0.104333		-0.02
4	49501	198004	0.0674949		-0.03
	733404	4.02646
