# Supplementary material for: Interaction Wave Functions and Interaction-Based Coherence and Entanglement in Complex Adaptive Systems
Source: Research Square preprint supplement (doi:10.21203/rs.3.rs-6846233/v1), 2025-06-16
Supplement: Supplementary file 360 [file 30613.xls]

## Sheet: Sheet1
4.05	48040	194562	0.0747046		0.02
4.04	199123	804457	0.309646		0.01
4.03	210460	848154	0.327276		0
4.02	146230	587845	0.227395		-0.01
4.01	39213	157244	0.0609782		-0.02
	643066	4.0311
