# Supplementary material for: Interaction Wave Functions and Interaction-Based Coherence and Entanglement in Complex Adaptive Systems
Source: Research Square preprint supplement (doi:10.21203/rs.3.rs-6846233/v1), 2025-06-16
Supplement: Supplementary file 361 [file 30616-20.xls]

## Sheet: Sheet1
0.07	128					128	8.96	6.82634e-05
0.06	77					77	4.62	4.10647e-05
0.05	11886			1469		13355	667.75	0.00712232
0.04	25553			37317		62870	2514.8	0.033529
0.03	12074		19638	28083	479	60274	1808.22	0.0321446
0.02	14031	31348	59921	76071	7463	188834	3776.68	0.100707
0.01	42600	20207	60347	36597	28936	188687	1886.87	0.100628
0	148557	47433	74587	67739	96030	434346	0	0.23164
-0.01	232995	82868	67244	108047	55898	547052	-5470.52	0.291747
-0.02	29822	21474	27481	173551	31438	283766	-5675.32	0.151335
-0.03		27518	620	59097		87235	-2617.05	0.0465231
-0.04				8467		8467	-338.68	0.00451551
						1875091	-0.0018312
