# Supplementary material for: Interaction Wave Functions and Interaction-Based Coherence and Entanglement in Complex Adaptive Systems
Source: Research Square preprint supplement (doi:10.21203/rs.3.rs-6846233/v1), 2025-06-16
Supplement: Supplementary file 362 [file 30616.xls]

## Sheet: Sheet1
4.04	128	517.12	0.000247236		0.07
4.03	77	310.31	0.000148728		0.06
4.02	11886	47781.7	0.0229582		0.05
4.01	25553	102468	0.0493565		0.04
4	12074	48296	0.0233214		0.03
3.99	14031	55983.7	0.0271014		0.02
3.98	42600	169548	0.0822834		0.01
3.97	148557	589771	0.286943		0
3.96	232995	922660	0.450038		-0.01
3.95	29822	117797	0.0576022		-0.02
	517723	3.96956
