# Supplementary material for: Interaction Wave Functions and Interaction-Based Coherence and Entanglement in Complex Adaptive Systems
Source: Research Square preprint supplement (doi:10.21203/rs.3.rs-6846233/v1), 2025-06-16
Supplement: Supplementary file 363 [file 30617.xls]

## Sheet: Sheet1
4	31348	125392	0.135795		0.02
3.99	20207	80625.9	0.0875338		0.01
3.98	47433	188783	0.205473		0
3.97	82868	328986	0.358972		-0.01
3.96	21474	85037	0.0930222		-0.02
3.95	27518	108696	0.119204		-0.03
	230848	3.97456
