# Supplementary material for: Interaction Wave Functions and Interaction-Based Coherence and Entanglement in Complex Adaptive Systems
Source: Research Square preprint supplement (doi:10.21203/rs.3.rs-6846233/v1), 2025-06-16
Supplement: Supplementary file 364 [file 30618.xls]

## Sheet: Sheet1
4.03	19638	79141.1	0.0633815		0.03
4.02	59921	240882	0.193395		0.02
4.01	60347	241991	0.19477		0.01
4	74587	298348	0.240729		0
3.99	67244	268304	0.21703		-0.01
3.98	27481	109374	0.0886947		-0.02
3.97	620	2461.4	0.00200105		-0.03
	309838	4.00371
