# Supplementary material for: Interaction Wave Functions and Interaction-Based Coherence and Entanglement in Complex Adaptive Systems
Source: Research Square preprint supplement (doi:10.21203/rs.3.rs-6846233/v1), 2025-06-16
Supplement: Supplementary file 365 [file 30619.xls]

## Sheet: Sheet1
4	1469	5876	0.00246296		0.05
3.99	37317	148895	0.0625664		0.04
3.98	28083	111770	0.0470845		0.03
3.97	76071	302002	0.127542		0.02
3.96	36597	144924	0.0613593		0.01
3.95	67739	267569	0.113573		0
3.94	108047	425705	0.181154		-0.01
3.93	173551	682055	0.290979		-0.02
3.92	59097	231660	0.0990832		-0.03
3.91	8467	33106	0.0141959		-0.04
	596438	3.94603
