# Supplementary material for: Interaction Wave Functions and Interaction-Based Coherence and Entanglement in Complex Adaptive Systems
Source: Research Square preprint supplement (doi:10.21203/rs.3.rs-6846233/v1), 2025-06-16
Supplement: Supplementary file 366 [file 30620.xls]

## Sheet: Sheet1
3.96	479	1896.84	0.00217486		0.03
3.95	7463	29478.9	0.0338851		0.02
3.94	28936	114008	0.131382		0.01
3.93	96030	377398	0.436016		0
3.92	55898	219120	0.2538		-0.01
3.91	31438	122923	0.142742		-0.02
	220244	3.92666
