# Supplementary material for: Interaction Wave Functions and Interaction-Based Coherence and Entanglement in Complex Adaptive Systems
Source: Research Square preprint supplement (doi:10.21203/rs.3.rs-6846233/v1), 2025-06-16
Supplement: Supplementary file 367 [file 30623-27.xls]

## Sheet: Sheet1
0.05				580	3400	3980		0.00271176
0.04	2005	16940	674	19048	16159	54826		0.0373556
0.03	3914	43508	13376	51193	23485	135476		0.0923062
0.02	31969	8434	34559	26577	10653	112192		0.0764417
0.01	25384	35731	47682	73606	19248	201651		0.137394
0	113466	79691	61974	22872	44569	322572		0.219784
-0.01	134274	43157	24650	33156	72072	307309		0.209384
-0.02	41103	57982	54412	31853	56114	241464		0.164521
-0.03	5152	6927	9819	24531	6045	52474		0.035753
-0.04				25014		25014		0.0170432
-0.05				10722		10722		0.00730541
						1467680
