# Supplementary material for: Interaction Wave Functions and Interaction-Based Coherence and Entanglement in Complex Adaptive Systems
Source: Research Square preprint supplement (doi:10.21203/rs.3.rs-6846233/v1), 2025-06-16
Supplement: Supplementary file 368 [file 30623.xls]

## Sheet: Sheet1
3.87	2005	7759.35	0.00561205		0.04
3.86	3914	15108	0.0109554		0.03
3.85	31969	123081	0.0894821		0.02
3.84	25384	97474.6	0.0710505		0.01
3.83	113466	434575	0.317594		0
3.82	134274	512927	0.375837		-0.01
3.81	41103	156602	0.115048		-0.02
3.8	5152	19577.6	0.0144206		-0.03
	357267	3.82656
