# Supplementary material for: Interaction Wave Functions and Interaction-Based Coherence and Entanglement in Complex Adaptive Systems
Source: Research Square preprint supplement (doi:10.21203/rs.3.rs-6846233/v1), 2025-06-16
Supplement: Supplementary file 369 [file 30624.xls]

## Sheet: Sheet1
3.86	16940	65388.4	0.0579403		0.04
3.85	43508	167506	0.148811		0.03
3.84	8434	32386.6	0.028847		0.02
3.83	35731	136850	0.122212		0.01
3.82	79691	304420	0.272569		0
3.81	43157	164428	0.147611		-0.01
3.8	57982	220332	0.198317		-0.02
3.79	6927	26253.3	0.0236926		-0.03
	292370	3.82243
