# Supplementary material for: Interaction Wave Functions and Interaction-Based Coherence and Entanglement in Complex Adaptive Systems
Source: Research Square preprint supplement (doi:10.21203/rs.3.rs-6846233/v1), 2025-06-16
Supplement: Supplementary file 370 [file 30625.xls]

## Sheet: Sheet1
3.84	674	2588.16	0.00272713		0.04
3.83	13376	51230.1	0.0541219		0.03
3.82	34559	132015	0.139832		0.02
3.81	47682	181668	0.19293		0.01
3.8	61974	235501	0.250759		0
3.79	24650	93423.5	0.0997386		-0.01
3.78	54412	205677	0.220161		-0.02
3.77	9819	37017.6	0.0397296		-0.03
	247146	3.79987
