# Supplementary material for: Interaction Wave Functions and Interaction-Based Coherence and Entanglement in Complex Adaptive Systems
Source: Research Square preprint supplement (doi:10.21203/rs.3.rs-6846233/v1), 2025-06-16
Supplement: Supplementary file 371 [file 30626.xls]

## Sheet: Sheet1
3.84	580	2227.2	0.00181732		0.05
3.83	19048	72953.8	0.0596832		0.04
3.82	51193	195557	0.160403		0.03
3.81	26577	101258	0.0832738		0.02
3.8	73606	279703	0.23063		0.01
3.79	22872	86684.9	0.0716649		0
3.78	33156	125330	0.103888		-0.01
3.77	31853	120086	0.0998051		-0.02
3.76	24531	92236.6	0.0768631		-0.03
3.75	25014	93802.5	0.0783764		-0.04
3.74	10722	40100.3	0.0335953		-0.05
	319152	3.79111
