# Supplementary material for: Interaction Wave Functions and Interaction-Based Coherence and Entanglement in Complex Adaptive Systems
Source: Research Square preprint supplement (doi:10.21203/rs.3.rs-6846233/v1), 2025-06-16
Supplement: Supplementary file 372 [file 30627.xls]

## Sheet: Sheet1
3.85	3400	13090	0.0135057		0.05
3.84	16159	62050.6	0.064188		0.04
3.83	23485	89947.6	0.0932888		0.03
3.82	10653	40694.5	0.0423166		0.02
3.81	19248	73334.9	0.0764583		0.01
3.8	44569	169362	0.17704		0
3.79	72072	273153	0.28629		-0.01
3.78	56114	212111	0.2229		-0.02
3.77	6045	22789.7	0.0240124		-0.03
	251745	3.79961
