# Supplementary material for: Interaction Wave Functions and Interaction-Based Coherence and Entanglement in Complex Adaptive Systems
Source: Research Square preprint supplement (doi:10.21203/rs.3.rs-6846233/v1), 2025-06-16
Supplement: Supplementary file 373 [file 30630.xls]

## Sheet: Sheet1
3.8	5220	19836	0.0203083		0.04
3.79	14837	56232.2	0.057723		0.03
3.78	21122	79841.2	0.0821746		0.02
3.77	28874	108855	0.112334		0.01
3.76	87124	327586	0.338954		0
3.75	60170	225638	0.23409		-0.01
3.74	39551	147921	0.153872		-0.02
3.73	140	522.2	0.000544667		-0.03
	257038	3.75988
