# Supplementary material for: Interaction Wave Functions and Interaction-Based Coherence and Entanglement in Complex Adaptive Systems
Source: Research Square preprint supplement (doi:10.21203/rs.3.rs-6846233/v1), 2025-06-16
Supplement: Supplementary file 374 [file 30602-06.xls]

## Sheet: Sheet1
0.16		401				401
0.15		419	98			517
0.14		342	0			342
0.13	580	182	23	18	228	1031	134.03	0.00825513
0.12	500	102	50	0	6	658	78.96	0.00526855
0.11	130	1551	80	180	6	1947	214.17	0.0155895
0.1	200	151	860	620	380	2211	221.1	0.0177033
0.09	101	226	1147	914	14	2402	216.18	0.0192326
0.08	1625	110	1773	2507	460	6475	518	0.0518448
0.07	110	327	926	1358	966	3687	258.09	0.0295215
0.06	1178	743	1584	1121	1207	5833	349.98	0.0467044
0.05	220	1213	2234	3286	1951	8904	445.2	0.0712936
0.04	570	1263	159	573	2584	5149	205.96	0.0412276
0.03	2603	556	641	859	2630	7289	218.67	0.0583624
0.02	470	946	1797	860	1190	5263	105.26	0.0421404
0.01	813	1821	475	154	597	3860	38.6	0.0309067
0	820	243	2917	606	3254	7840	0	0.0627742
-0.01	1089	1648	1053	335	840	4965	-49.65	0.0397543
-0.02	2622	1174	2078	396	1597	7867	-157.34	0.0629904
-0.03	929	779	322	1525	902	4457	-133.71	0.0356868
-0.04	471	2753	674	1577	1027	6502	-260.08	0.052061
-0.05	2314	1238	5275	3572	2458	14857	-742.85	0.118959
-0.06	1027	726	1973	1432	331	5489	-329.34	0.04395
-0.07	1861	1880	1841	752	1876	8210	-574.7	0.0657368
-0.08	502	680	977	1479	385	4023	-321.84	0.0322118
-0.09	530	1224		566	452	2772	-249.48	0.0221952
-0.1	702			1239		1941	-194.1	0.0155414
						124892	-7.11815e-05
