# Supplementary material for: Interaction Wave Functions and Interaction-Based Coherence and Entanglement in Complex Adaptive Systems
Source: Research Square preprint supplement (doi:10.21203/rs.3.rs-6846233/v1), 2025-06-16
Supplement: Supplementary file 375 [file 30602.xls]

## Sheet: Sheet1
8.7	580	5046	0.0264032		0.13
8.69	500	4345	0.0227614		0.12
8.68	130	1128.4	0.00591797		0.11
8.67	200	1734	0.00910457		0.1
8.66	101	874.66	0.00459781		0.09
8.65	1625	14056.2	0.0739746		0.08
8.64	110	950.4	0.00500751		0.07
8.63	1178	10166.1	0.0536259		0.06
8.62	220	1896.4	0.010015		0.05
8.61	570	4907.7	0.025948		0.04
8.6	2603	22385.8	0.118496		0.03
8.59	470	4037.3	0.0213957		0.02
8.58	813	6975.54	0.0370101		0.01
8.57	820	7027.4	0.0373287		0
8.56	1089	9321.84	0.0495744		-0.01
8.55	2622	22418.1	0.119361		-0.02
8.54	929	7933.66	0.0422907		-0.03
8.53	471	4017.63	0.0214413		-0.04
8.52	2314	19715.3	0.10534		-0.05
8.51	1027	8739.77	0.0467519		-0.06
8.5	1861	15818.5	0.084718		-0.07
8.49	502	4261.98	0.0228525		-0.08
8.48	530	4494.4	0.0241271		-0.09
8.47	702	5945.94	0.031957		-0.1
	21967	8.56731
