# Supplementary material for: Interaction Wave Functions and Interaction-Based Coherence and Entanglement in Complex Adaptive Systems
Source: Research Square preprint supplement (doi:10.21203/rs.3.rs-6846233/v1), 2025-06-16
Supplement: Supplementary file 376 [file 30603.xls]

## Sheet: Sheet1
8.6	401	3448.6	0.0176668		0.16
8.59	419	3599.21	0.0184598		0.15
8.58	342	2934.36	0.0150674		0.14
8.57	182	1559.74	0.00801833		0.13
8.56	102	873.12	0.00449379		0.12
8.55	1551	13261.1	0.068332		0.11
8.54	151	1289.54	0.00665257		0.1
8.53	226	1927.78	0.00995682		0.09
8.52	110	937.2	0.00484624		0.08
8.51	327	2782.77	0.0144066		0.07
8.5	743	6315.5	0.0327342		0.06
8.49	1213	10298.4	0.0534408		0.05
8.48	1263	10710.2	0.0556437		0.04
8.47	556	4709.32	0.0244956		0.03
8.46	946	8003.16	0.0416777		0.02
8.45	1821	15387.5	0.0802273		0.01
8.44	243	2050.92	0.0107058		0
8.43	1648	13892.6	0.0726055		-0.01
8.42	1174	9885.08	0.0517226		-0.02
8.41	779	6551.39	0.0343202		-0.03
8.4	2753	23125.2	0.121288		-0.04
8.39	1238	10386.8	0.0545423		-0.05
8.38	726	6083.88	0.0319852		-0.06
8.37	1880	15735.6	0.0828267		-0.07
8.36	680	5684.8	0.0299586		-0.08
8.35	1224	10220.4	0.0539255		-0.09
	22698	8.44366
