# Supplementary material for: Interaction Wave Functions and Interaction-Based Coherence and Entanglement in Complex Adaptive Systems
Source: Research Square preprint supplement (doi:10.21203/rs.3.rs-6846233/v1), 2025-06-16
Supplement: Supplementary file 377 [file 30604.xls]

## Sheet: Sheet1
8.45	98	828.1	0.00338433		0.15
8.44	0	0	0		0.14
8.43	23	193.89	0.000794281		0.13
8.42	50	421	0.0017267		0.12
8.41	80	672.8	0.00276272		0.11
8.4	860	7224	0.0296992		0.1
8.39	1147	9623.33	0.0396105		0.09
8.38	1773	14857.7	0.0612287		0.08
8.37	926	7750.62	0.0319785		0.07
8.36	1584	13242.2	0.0547018		0.06
8.35	2234	18653.9	0.0771489		0.05
8.34	159	1326.06	0.0054909		0.04
8.33	641	5339.53	0.0221363		0.03
8.32	1797	14951	0.0620575		0.02
8.31	475	3947.25	0.0164036		0.01
8.3	2917	24211.1	0.100736		0
8.29	1053	8729.37	0.0363643		-0.01
8.28	2078	17205.8	0.0717616		-0.02
8.27	322	2662.94	0.0111199		-0.03
8.26	674	5567.24	0.0232759		-0.04
8.25	5275	43518.8	0.182167		-0.05
8.24	1973	16257.5	0.0681355		-0.06
8.23	1841	15151.4	0.063577		-0.07
8.22	977	8030.94	0.0337397		-0.08
	28957	8.30081
