# Supplementary material for: Interaction Wave Functions and Interaction-Based Coherence and Entanglement in Complex Adaptive Systems
Source: Research Square preprint supplement (doi:10.21203/rs.3.rs-6846233/v1), 2025-06-16
Supplement: Supplementary file 378 [file 30605.xls]

## Sheet: Sheet1
8.43	18	151.74	0.000694203		0.13
8.42	0	0	0		0.12
8.41	180	1513.8	0.00694203		0.11
8.4	620	5208	0.0239115		0.1
8.39	914	7668.46	0.0352501		0.09
8.38	2507	21008.7	0.0966871		0.08
8.37	1358	11366.5	0.0523738		0.07
8.36	1121	9371.56	0.0432334		0.06
8.35	3286	27438.1	0.126731		0.05
8.34	573	4778.82	0.0220988		0.04
8.33	859	7155.47	0.0331289		0.03
8.32	860	7155.2	0.0331675		0.02
8.31	154	1279.74	0.0059393		0.01
8.3	606	5029.8	0.0233715		0
8.29	335	2777.15	0.0129199		-0.01
8.28	396	3278.88	0.0152725		-0.02
8.27	1525	12611.8	0.0588145		-0.03
8.26	1577	13026	0.0608199		-0.04
8.25	3572	29469	0.137761		-0.05
8.24	1432	11799.7	0.0552277		-0.06
8.23	752	6188.96	0.0290023		-0.07
8.22	1479	12157.4	0.0570404		-0.08
8.21	566	4646.86	0.0218288		-0.09
8.2	1239	10159.8	0.0477843		-0.1
	25929	8.30118
