# Supplementary material for: Interaction Wave Functions and Interaction-Based Coherence and Entanglement in Complex Adaptive Systems
Source: Research Square preprint supplement (doi:10.21203/rs.3.rs-6846233/v1), 2025-06-16
Supplement: Supplementary file 379 [file 30606.xls]

## Sheet: Sheet1
8.28	228	1887.84	0.00899728		0.13
8.27	6	49.62	0.00023677		0.12
8.26	6	49.56	0.00023677		0.11
8.25	380	3135	0.0149955		0.1
8.24	14	115.36	0.000552464		0.09
8.23	460	3785.8	0.0181524		0.08
8.22	966	7940.52	0.03812		0.07
8.21	1207	9909.47	0.0476303		0.06
8.2	1951	15998.2	0.0769899		0.05
8.19	2584	21163	0.101969		0.04
8.18	2630	21513.4	0.103784		0.03
8.17	1190	9722.3	0.0469595		0.02
8.16	597	4871.52	0.0235587		0.01
8.15	3254	26520.1	0.128409		0
8.14	840	6837.6	0.0331479		-0.01
8.13	1597	12983.6	0.0630204		-0.02
8.12	902	7324.24	0.0355945		-0.03
8.11	1027	8328.97	0.0405272		-0.04
8.1	2458	19909.8	0.096997		-0.05
8.09	331	2677.79	0.0130618		-0.06
8.08	1876	15158.1	0.0740302		-0.07
8.07	385	3106.95	0.0151928		-0.08
8.06	452	3643.12	0.0178367		-0.09
	25341	8.15405
