# Supplementary material for: Interaction Wave Functions and Interaction-Based Coherence and Entanglement in Complex Adaptive Systems
Source: Research Square preprint supplement (doi:10.21203/rs.3.rs-6846233/v1), 2025-06-16
Supplement: Supplementary file 380 [file 30609-13.xls]

## Sheet: Sheet1
0.12					80	80	9.6	0.00094203
0.11					214	214	23.54	0.00251993
0.1	357			579	500	1436	143.6	0.0169094
0.09	0	111		0	594	705	63.45	0.00830164
0.08	0	30	552	975	0	1557	124.56	0.0183343
0.07	116	250	1772	753	691	3582	250.74	0.0421794
0.06	594	616	23	306	1626	3165	189.9	0.0372691
0.05	237	2254	3105	2364	1267	9227	461.35	0.108651
0.04	180	851	610	985	705	3331	133.24	0.0392238
0.03	192	604	4001	827	660	6284	188.52	0.0739964
0.02	3204	1269	1938	1560	903	8874	177.48	0.104495
0.01	1954	824	1336	914	856	5884	58.84	0.0692863
0	2459	1266	1377	1975	628	7705	0	0.0907292
-0.01	1913	93	1107	286	2872	6271	-62.71	0.0738434
-0.02	1891	740	1114	850	695	5290	-105.8	0.0622917
-0.03	1048	6	742	309	748	2853	-85.59	0.0335951
-0.04	544	300	452	316	630	2242	-89.68	0.0264004
-0.05	34	248	2458	1234	428	4402	-220.1	0.0518352
-0.06		358	44	64	798	1264	-75.84	0.0148841
-0.07		80	1087	673	1214	3054	-213.78	0.035962
-0.08		480	648	200	1068	2396	-191.68	0.0282138
-0.09		500	253	1316	40	2109	-189.81	0.0248343
-0.1		660	518	1580		2758	-275.8	0.0324765
-0.11			6			6	-0.66	7.06522e-05
-0.12			64			64	-7.68	0.000753624
-0.13			98			98	-12.74	0.00115399
-0.14			27			27	-3.78	0.000317935
-0.15			45			45	-6.75	0.000529892
						84923	0.0033256
