# Supplementary material for: Interaction Wave Functions and Interaction-Based Coherence and Entanglement in Complex Adaptive Systems
Source: Research Square preprint supplement (doi:10.21203/rs.3.rs-6846233/v1), 2025-06-16
Supplement: Supplementary file 381 [file 30609.xls]

## Sheet: Sheet1
8.18	357	2920.26	0.0242478		0.1
8.17	0	0	0		0.09
8.16	0	0	0		0.08
8.15	116	945.4	0.00787883		0.07
8.14	594	4835.16	0.040345		0.06
8.13	237	1926.81	0.0160973		0.05
8.12	180	1461.6	0.0122258		0.04
8.11	192	1557.12	0.0130408		0.03
8.1	3204	25952.4	0.217619		0.02
8.09	1954	15807.9	0.132718		0.01
8.08	2459	19868.7	0.167018		0
8.07	1913	15437.9	0.129933		-0.01
8.06	1891	15241.5	0.128438		-0.02
8.05	1048	8436.4	0.0711811		-0.03
8.04	544	4373.76	0.036949		-0.04
8.03	34	273.02	0.00230931		-0.05
	14723	8.08516
