# Supplementary material for: Interaction Wave Functions and Interaction-Based Coherence and Entanglement in Complex Adaptive Systems
Source: Research Square preprint supplement (doi:10.21203/rs.3.rs-6846233/v1), 2025-06-16
Supplement: Supplementary file 382 [file 30610.xls]

## Sheet: Sheet1
8.19	111	909.09	0.00961872		0.09
8.18	30	245.4	0.00259965		0.08
8.17	250	2042.5	0.0216638		0.07
8.16	616	5026.56	0.0533795		0.06
8.15	2254	18370.1	0.195321		0.05
8.14	851	6927.14	0.0737435		0.04
8.13	604	4910.52	0.0523397		0.03
8.12	1269	10304.3	0.109965		0.02
8.11	824	6682.64	0.0714038		0.01
8.1	1266	10254.6	0.109705		0
8.09	93	752.37	0.00805893		-0.01
8.08	740	5979.2	0.0641248		-0.02
8.07	6	48.42	0.000519931		-0.03
8.06	300	2418	0.0259965		-0.04
8.05	248	1996.4	0.0214905		-0.05
8.04	358	2878.32	0.0310225		-0.06
8.03	80	642.4	0.00693241		-0.07
8.02	480	3849.6	0.0415945		-0.08
8.01	500	4005	0.0433276		-0.09
8	660	5280	0.0571924		-0.1
	11540	8.10421
