# Supplementary material for: Interaction Wave Functions and Interaction-Based Coherence and Entanglement in Complex Adaptive Systems
Source: Research Square preprint supplement (doi:10.21203/rs.3.rs-6846233/v1), 2025-06-16
Supplement: Supplementary file 383 [file 30611.xls]

## Sheet: Sheet1
8.33	552	4598.16	0.023613		0.08
8.32	1772	14743	0.075801		0.07
8.31	23	191.13	0.000983873		0.06
8.3	3105	25771.5	0.132823		0.05
8.29	610	5056.9	0.026094		0.04
8.28	4001	33128.3	0.171151		0.03
8.27	1938	16027.3	0.082902		0.02
8.26	1336	11035.4	0.0571502		0.01
8.25	1377	11360.3	0.0589041		0
8.24	1107	9121.68	0.0473542		-0.01
8.23	1114	9168.22	0.0476537		-0.02
8.22	742	6099.24	0.0317406		-0.03
8.21	452	3710.92	0.0193352		-0.04
8.2	2458	20155.6	0.105146		-0.05
8.19	44	360.36	0.00188219		-0.06
8.18	1087	8891.66	0.0464987		-0.07
8.17	648	5294.16	0.0277196		-0.08
8.16	253	2064.48	0.0108226		-0.09
8.15	518	4221.7	0.0221585		-0.1
8.14	6	48.84	0.000256663		-0.11
8.13	64	520.32	0.00273773		-0.12
8.12	98	795.76	0.00419215		-0.13
8.11	27	218.97	0.00115498		-0.14
8.1	45	364.5	0.00192497		-0.15
	23377	8.25377
