# Supplementary material for: Interaction Wave Functions and Interaction-Based Coherence and Entanglement in Complex Adaptive Systems
Source: Research Square preprint supplement (doi:10.21203/rs.3.rs-6846233/v1), 2025-06-16
Supplement: Supplementary file 384 [file 30612.xls]

## Sheet: Sheet1
8.35	579	4834.65	0.0320492		0.1
8.34	0	0	0		0.09
8.33	975	8121.75	0.0539688		0.08
8.32	753	6264.96	0.0416805		0.07
8.31	306	2542.86	0.0169379		0.06
8.3	2364	19621.2	0.130854		0.05
8.29	985	8165.65	0.0545223		0.04
8.28	827	6847.56	0.0457766		0.03
8.27	1560	12901.2	0.08635		0.02
8.26	914	7549.64	0.0505923		0.01
8.25	1975	16293.8	0.109321		0
8.24	286	2356.64	0.0158308		-0.01
8.23	850	6995.5	0.0470497		-0.02
8.22	309	2539.98	0.017104		-0.03
8.21	316	2594.36	0.0174914		-0.04
8.2	1234	10118.8	0.0683051		-0.05
8.19	64	524.16	0.00354257		-0.06
8.18	673	5505.14	0.0372523		-0.07
8.17	200	1634	0.0110705		-0.08
8.16	1316	10738.6	0.072844		-0.09
8.15	1580	12877	0.0874571		-0.1
	18066	8.24905
