# Supplementary material for: Interaction Wave Functions and Interaction-Based Coherence and Entanglement in Complex Adaptive Systems
Source: Research Square preprint supplement (doi:10.21203/rs.3.rs-6846233/v1), 2025-06-16
Supplement: Supplementary file 385 [file 30613.xls]

## Sheet: Sheet1
8.38	80	670.4	0.00464657		0.12
8.37	214	1791.18	0.0124296		0.11
8.36	500	4180	0.0290411		0.1
8.35	594	4959.9	0.0345008		0.09
8.34	0	0	0		0.08
8.33	691	5756.03	0.0401348		0.07
8.32	1626	13528.3	0.0944415		0.06
8.31	1267	10528.8	0.0735901		0.05
8.3	705	5851.5	0.0409479		0.04
8.29	660	5471.4	0.0383342		0.03
8.28	903	7476.84	0.0524482		0.02
8.27	856	7079.12	0.0497183		0.01
8.26	628	5187.28	0.0364756		0
8.25	2872	23694	0.166812		-0.01
8.24	695	5726.8	0.0403671		-0.02
8.23	748	6156.04	0.0434454		-0.03
8.22	630	5178.6	0.0365917		-0.04
8.21	428	3513.88	0.0248592		-0.05
8.2	798	6543.6	0.0463495		-0.06
8.19	1214	9942.66	0.0705117		-0.07
8.18	1068	8736.24	0.0620317		-0.08
8.17	40	326.8	0.00232329		-0.09
	17217	8.26505
