# Supplementary material for: Interaction Wave Functions and Interaction-Based Coherence and Entanglement in Complex Adaptive Systems
Source: Research Square preprint supplement (doi:10.21203/rs.3.rs-6846233/v1), 2025-06-16
Supplement: Supplementary file 386 [file 30616-20.xls]

## Sheet: Sheet1
0.12					500	500	60	0.00720347
0.11					0	0	0	0
0.1					0	0	0	0
0.09			980	85	826	1891	170.19	0.0272435
0.08	300		477	0	300	1077	86.16	0.0155163
0.07	168		0	2140	586	2894	202.58	0.0416937
0.06	1102	118	0	458	0	1678	100.68	0.0241748
0.05	207	0	864	94	2	1167	58.35	0.0168129
0.04	0	0	1117	371	981	2469	98.76	0.0355707
0.03	2400	2444	3068	272	709	8893	266.79	0.128121
0.02	562	244	620	7	1246	2679	53.58	0.0385962
0.01	893	2036	1170	1468	270	5837	58.37	0.0840933
0	625	669	2987	974	123	5378	0	0.0774805
-0.01	607	280	2897	2132	3357	9273	-92.73	0.133596
-0.02	1686	688	1478	990	262	5104	-102.08	0.073533
-0.03	1704	404	733	1494	1076	5411	-162.33	0.0779559
-0.04	390	366	3108	647	1947	6458	-258.32	0.09304
-0.05	761	858	403	375	1352	3749	-187.45	0.0540116
-0.06	310	232	187	2	1928	2659	-159.54	0.038308
-0.07	500	288	110	306	265	1469	-102.83	0.0211638
-0.08		203	312	0		515	-41.2	0.00741957
-0.09				310		310	-27.9	0.00446615
						69411	0.000303698
