# Supplementary material for: Interaction Wave Functions and Interaction-Based Coherence and Entanglement in Complex Adaptive Systems
Source: Research Square preprint supplement (doi:10.21203/rs.3.rs-6846233/v1), 2025-06-16
Supplement: Supplementary file 387 [file 30616.xls]

## Sheet: Sheet1
8.3	300	2490	0.02456		0.08
8.29	168	1392.72	0.0137536		0.07
8.28	1102	9124.56	0.0902169		0.06
8.27	207	1711.89	0.0169464		0.05
8.26	0	0	0		0.04
8.25	2400	19800	0.19648		0.03
8.24	562	4630.88	0.046009		0.02
8.23	893	7349.39	0.0731068		0.01
8.22	625	5137.5	0.0511666		0
8.21	607	4983.47	0.049693		-0.01
8.2	1686	13825.2	0.138027		-0.02
8.19	1704	13955.8	0.139501		-0.03
8.18	390	3190.2	0.031928		-0.04
8.17	761	6217.37	0.0623005		-0.05
8.16	310	2529.6	0.0253786		-0.06
8.15	500	4075	0.0409333		-0.07
	12215	8.22051
