# Supplementary material for: Interaction Wave Functions and Interaction-Based Coherence and Entanglement in Complex Adaptive Systems
Source: Research Square preprint supplement (doi:10.21203/rs.3.rs-6846233/v1), 2025-06-16
Supplement: Supplementary file 388 [file 30617.xls]

## Sheet: Sheet1
8.33	118	982.94	0.0133635		0.06
8.32	0	0	0		0.05
8.31	0	0	0		0.04
8.3	2444	20285.2	0.276784		0.03
8.29	244	2022.76	0.0276331		0.02
8.28	2036	16858.1	0.230578		0.01
8.27	669	5532.63	0.0757644		0
8.26	280	2312.8	0.0317101		-0.01
8.25	688	5676	0.0779162		-0.02
8.24	404	3328.96	0.0457531		-0.03
8.23	366	3012.18	0.0414496		-0.04
8.22	858	7052.76	0.0971687		-0.05
8.21	232	1904.72	0.0262741		-0.06
8.2	288	2361.6	0.0326161		-0.07
8.19	203	1662.57	0.0229898		-0.08
	8830	8.2665
