# Supplementary material for: Interaction Wave Functions and Interaction-Based Coherence and Entanglement in Complex Adaptive Systems
Source: Research Square preprint supplement (doi:10.21203/rs.3.rs-6846233/v1), 2025-06-16
Supplement: Supplementary file 389 [file 30618.xls]

## Sheet: Sheet1
8.39	980	8222.2	0.0477792		0.09
8.38	477	3997.26	0.0232558		0.08
8.37	0	0	0		0.07
8.36	0	0	0		0.06
8.35	864	7214.4	0.0421237		0.05
8.34	1117	9315.78	0.0544586		0.04
8.33	3068	25556.4	0.149578		0.03
8.32	620	5158.4	0.0302277		0.02
8.31	1170	9722.7	0.0570426		0.01
8.3	2987	24792.1	0.145629		0
8.29	2897	24016.1	0.141241		-0.01
8.28	1478	12237.8	0.0720589		-0.02
8.27	733	6061.91	0.0357369		-0.03
8.26	3108	25672.1	0.151528		-0.04
8.25	403	3324.75	0.019648		-0.05
8.24	187	1540.88	0.00911706		-0.06
8.23	110	905.3	0.00536298		-0.07
8.22	312	2564.64	0.0152114		-0.08
	20511	8.303
