# Supplementary material for: Interaction Wave Functions and Interaction-Based Coherence and Entanglement in Complex Adaptive Systems
Source: Research Square preprint supplement (doi:10.21203/rs.3.rs-6846233/v1), 2025-06-16
Supplement: Supplementary file 390 [file 30619.xls]

## Sheet: Sheet1
8.28	85	703.8	0.00701031		0.09
8.27	0	0	0		0.08
8.26	2140	17676.4	0.176495		0.07
8.25	458	3778.5	0.0377732		0.06
8.24	94	774.56	0.00775258		0.05
8.23	371	3053.33	0.0305979		0.04
8.22	272	2235.84	0.022433		0.03
8.21	7	57.47	0.00057732		0.02
8.2	1468	12037.6	0.121072		0.01
8.19	974	7977.06	0.0803299		0
8.18	2132	17439.8	0.175835		-0.01
8.17	990	8088.3	0.0816495		-0.02
8.16	1494	12191	0.123216		-0.03
8.15	647	5273.05	0.0533608		-0.04
8.14	375	3052.5	0.0309278		-0.05
8.13	2	16.26	0.000164948		-0.06
8.12	306	2484.72	0.0252371		-0.07
8.11	0	0	0		-0.08
8.1	310	2511	0.025567		-0.09
	12125	8.19391
