# Supplementary material for: Interaction Wave Functions and Interaction-Based Coherence and Entanglement in Complex Adaptive Systems
Source: Research Square preprint supplement (doi:10.21203/rs.3.rs-6846233/v1), 2025-06-16
Supplement: Supplementary file 391 [file 30620.xls]

## Sheet: Sheet1
8.23	500	4115	0.0317864		0.12
8.22	0	0	0		0.11
8.21	0	0	0		0.1
8.2	826	6773.2	0.0525111		0.09
8.19	300	2457	0.0190718		0.08
8.18	586	4793.48	0.0372537		0.07
8.17	0	0	0		0.06
8.16	2	16.32	0.000127146		0.05
8.15	981	7995.15	0.0623649		0.04
8.14	709	5771.26	0.0450731		0.03
8.13	1246	10130	0.0792117		0.02
8.12	270	2192.4	0.0171647		0.01
8.11	123	997.53	0.00781945		0
8.1	3357	27191.7	0.213414		-0.01
8.09	262	2119.58	0.0166561		-0.02
8.08	1076	8694.08	0.0684043		-0.03
8.07	1947	15712.3	0.123776		-0.04
8.06	1352	10897.1	0.0859504		-0.05
8.05	1928	15520.4	0.122568		-0.06
8.04	265	2130.6	0.0168468		-0.07
	15730	8.10598
