# Supplementary material for: Interaction Wave Functions and Interaction-Based Coherence and Entanglement in Complex Adaptive Systems
Source: Research Square preprint supplement (doi:10.21203/rs.3.rs-6846233/v1), 2025-06-16
Supplement: Supplementary file 392 [file 30623-27.xls]

## Sheet: Sheet1
0.12			58			58		0.000743685
0.11			0	1180		1180		0.0151301
0.1		58	0	580		638		0.00818054
0.09		0	0	137		137		0.00175664
0.08		0	10	317		327		0.00419285
0.07	205	186	224	161		776		0.00994999
0.06	0	50	199	1834	2729	4812		0.0617002
0.05	328	1220	660	327	7745	10280		0.131812
0.04	0	867	260	1378	2597	5102		0.0654186
0.03	0	169	344	1027	2000	3540		0.0453904
0.02	773	742	1360	656	807	4338		0.0556225
0.01	437	307	404	1812	4648	7608		0.097551
0	1517	398	771	623	770	4079		0.0523016
-0.01	798	1964	1070	1699	1512	7043		0.0903064
-0.02	1463	1349	1556	341	969	5678		0.0728042
-0.03	818	2015	2327	670	1641	7471		0.0957943
-0.04			204	534	1733	2471		0.0316835
-0.05			60	30	1545	1635		0.0209642
-0.06				462	2083	2545		0.0326324
-0.07				174	1965	2139		0.0274266
-0.08				499	644	1143		0.0146557
-0.09				446	1118	1564		0.0200539
-0.1				35	6	41		0.000525708
-0.11				868	433	1301		0.0166816
-0.12				357	128	485		0.00621875
-0.13				118	219	337		0.00432107
-0.14				613		613		0.00785998
-0.15				372		372		0.00476984
-0.16				100		100		0.00128222
-0.17				177		177		0.00226952
						77990
