# Supplementary material for: Interaction Wave Functions and Interaction-Based Coherence and Entanglement in Complex Adaptive Systems
Source: Research Square preprint supplement (doi:10.21203/rs.3.rs-6846233/v1), 2025-06-16
Supplement: Supplementary file 393 [file 30623.xls]

## Sheet: Sheet1
8.15	205	1670.75	0.0323395		0.07
8.14	0	0	0		0.06
8.13	328	2666.64	0.0517432		0.05
8.12	0	0	0		0.04
8.11	0	0	0		0.03
8.1	773	6261.3	0.121944		0.02
8.09	437	3535.33	0.0689383		0.01
8.08	1517	12257.4	0.239312		0
8.07	798	6439.86	0.125887		-0.01
8.06	1463	11791.8	0.230794		-0.02
8.05	818	6584.9	0.129042		-0.03
	6339	8.07823
