# Supplementary material for: Interaction Wave Functions and Interaction-Based Coherence and Entanglement in Complex Adaptive Systems
Source: Research Square preprint supplement (doi:10.21203/rs.3.rs-6846233/v1), 2025-06-16
Supplement: Supplementary file 394 [file 30624.xls]

## Sheet: Sheet1
8.13	58	471.54	0.00621984		0.1
8.12	0	0	0		0.09
8.11	0	0	0		0.08
8.1	186	1506.6	0.0199464		0.07
8.09	50	404.5	0.00536193		0.06
8.08	1220	9857.6	0.130831		0.05
8.07	867	6996.69	0.0929759		0.04
8.06	169	1362.14	0.0181233		0.03
8.05	742	5973.1	0.079571		0.02
8.04	307	2468.28	0.0329223		0.01
8.03	398	3195.94	0.042681		0
8.02	1964	15751.3	0.210617		-0.01
8.01	1349	10805.5	0.144665		-0.02
8	2015	16120	0.216086		-0.03
	9325	8.03358
