# Supplementary material for: Interaction Wave Functions and Interaction-Based Coherence and Entanglement in Complex Adaptive Systems
Source: Research Square preprint supplement (doi:10.21203/rs.3.rs-6846233/v1), 2025-06-16
Supplement: Supplementary file 395 [file 30625.xls]

## Sheet: Sheet1
8.15	58	472.7	0.00610077		0.12
8.14	0	0	0		0.11
8.13	0	0	0		0.1
8.12	0	0	0		0.09
8.11	10	81.1	0.00105186		0.08
8.1	224	1814.4	0.0235616		0.07
8.09	199	1609.91	0.0209319		0.06
8.08	660	5332.8	0.0694225		0.05
8.07	260	2098.2	0.0273483		0.04
8.06	344	2772.64	0.0361839		0.03
8.05	1360	10948	0.143052		0.02
8.04	404	3248.16	0.042495		0.01
8.03	771	6191.13	0.0810981		0
8.02	1070	8581.4	0.112549		-0.01
8.01	1556	12463.6	0.163669		-0.02
8	2327	18616	0.244767		-0.03
7.99	204	1629.96	0.0214579		-0.04
7.98	60	478.8	0.00631114		-0.05
	9507	8.02974
