# Supplementary material for: Interaction Wave Functions and Interaction-Based Coherence and Entanglement in Complex Adaptive Systems
Source: Research Square preprint supplement (doi:10.21203/rs.3.rs-6846233/v1), 2025-06-16
Supplement: Supplementary file 396 [file 30626.xls]

## Sheet: Sheet1
8.15	1180	9617	0.0673247		0.11
8.14	580	4721.2	0.0330918		0.1
8.13	137	1113.81	0.00781651		0.09
8.12	317	2574.04	0.0180864		0.08
8.11	161	1305.71	0.00918583		0.07
8.1	1834	14855.4	0.104639		0.06
8.09	327	2645.43	0.0186569		0.05
8.08	1378	11134.2	0.0786216		0.04
8.07	1027	8287.89	0.0585953		0.03
8.06	656	5287.36	0.037428		0.02
8.05	1812	14586.6	0.103383		0.01
8.04	623	5008.92	0.0355452		0
8.03	1699	13643	0.0969362		-0.01
8.02	341	2734.82	0.0194557		-0.02
8.01	670	5366.7	0.0382267		-0.03
8	534	4272	0.0304673		-0.04
7.99	30	239.7	0.00171164		-0.05
7.98	462	3686.76	0.0263593		-0.06
7.97	174	1386.78	0.00992754		-0.07
7.96	499	3972.04	0.0284704		-0.08
7.95	446	3545.7	0.0254465		-0.09
7.94	35	277.9	0.00199692		-0.1
7.93	868	6883.24	0.0495236		-0.11
7.92	357	2827.44	0.0203686		-0.12
7.91	118	933.38	0.00673247		-0.13
7.9	613	4842.7	0.0349746		-0.14
7.89	372	2935.08	0.0212244		-0.15
7.88	100	788	0.00570548		-0.16
7.87	177	1392.99	0.0100987		-0.17
	17527	8.03707
