# Supplementary material for: Interaction Wave Functions and Interaction-Based Coherence and Entanglement in Complex Adaptive Systems
Source: Research Square preprint supplement (doi:10.21203/rs.3.rs-6846233/v1), 2025-06-16
Supplement: Supplementary file 397 [file 30627.xls]

## Sheet: Sheet1
8.25	2729	22514.2	0.0773263		0.06
8.24	7745	63818.8	0.219455		0.05
8.23	2597	21373.3	0.0735861		0.04
8.22	2000	16440	0.0566701		0.03
8.21	807	6625.47	0.0228664		0.02
8.2	4648	38113.6	0.131701		0.01
8.19	770	6306.3	0.021818		0
8.18	1512	12368.2	0.0428426		-0.01
8.17	969	7916.73	0.0274566		-0.02
8.16	1641	13390.6	0.0464978		-0.03
8.15	1733	14124	0.0491046		-0.04
8.14	1545	12576.3	0.0437776		-0.05
8.13	2083	16934.8	0.0590219		-0.06
8.12	1965	15955.8	0.0556783		-0.07
8.11	644	5222.84	0.0182478		-0.08
8.1	1118	9055.8	0.0316786		-0.09
8.09	6	48.54	0.00017001		-0.1
8.08	433	3498.64	0.0122691		-0.11
8.07	128	1032.96	0.00362688		-0.12
8.06	219	1765.14	0.00620537		-0.13
	35292	8.19115
