# Supplementary material for: Interaction Wave Functions and Interaction-Based Coherence and Entanglement in Complex Adaptive Systems
Source: Research Square preprint supplement (doi:10.21203/rs.3.rs-6846233/v1), 2025-06-16
Supplement: Supplementary file 398 [file 30602-06.xls]

## Sheet: Sheet1
0.36		105				105	37.8	0.00156043
0.35	231	55	183			469	164.15	0.00696994
0.34	0	171	0			171	58.14	0.00254128
0.33	0	0	24			24	7.92	0.00035667
0.32	0	4	0	35	2300	2339	748.48	0.0347605
0.31	0	291	0	65	230	586	181.66	0.0087087
0.3	0	30	0	25	847	902	270.6	0.0134049
0.29	0	0	40	0	712	752	218.08	0.0111757
0.28	280	0	0	0	80	360	100.8	0.00535006
0.27	779	10	1	94	656	1540	415.8	0.0228864
0.26	284	98	3	0	89	474	123.24	0.00704424
0.25	0	0	902	0	40	942	235.5	0.0139993
0.24	0	174	0	11	55	240	57.6	0.0035667
0.23	328	54	44	4	217	647	148.81	0.00961524
0.22	73	0	52	352	621	1098	241.56	0.0163177
0.21	103	66	0	180	0	349	73.29	0.00518658
0.2	76	36	214	205	92	623	124.6	0.00925857
0.19	446	0	0	0	0	446	84.74	0.00662813
0.18	2405	5	0	0	141	2551	459.18	0.0379111
0.17	174	4	0	0	97	275	46.75	0.00408685
0.16	347	896	0	0	70	1313	210.08	0.0195128
0.15	4	144	337	24	83	592	88.8	0.00879787
0.14	83	242	231	137	0	693	97.02	0.0102989
0.13	656	54	567	6	29	1312	170.56	0.019498
0.12	39	219	14	396	793	1461	175.32	0.0217123
0.11	19	1046	327	4	109	1505	165.55	0.0223662
0.1	35	49	59	302	2205	2650	265	0.0393824
0.09	16	148	435	0	408	1007	90.63	0.0149653
0.08	90	49	115	80	455	789	63.12	0.0117255
0.07	276	142	0	450	658	1526	106.82	0.0226783
0.06	167	1231	87	27	82	1594	95.64	0.0236889
0.05	38	107	402	0	457	1004	50.2	0.0149207
0.04	66	28	14	31	121	260	10.4	0.00386393
0.03	531	148	655	23	3	1360	40.8	0.0202113
0.02	242	1	46	431	726	1446	28.92	0.0214894
0.01	272	285	594	184	33	1368	13.68	0.0203302
-1.97758e-16	13	164	244	142	138	701	-1.38629e-13	0.0104178
-0.01	39	117	14	0	242	412	-4.12	0.00612284
-0.02	994	60	10	60	428	1552	-31.04	0.0230647
-0.03	0	148	13	302	788	1251	-37.53	0.0185914
-0.04	154	766	67	4	4	995	-39.8	0.014787
-0.05	124	117	728	43	8	1020	-51	0.0151585
-0.06	16	17	61	168	325	587	-35.22	0.00872357
-0.07	11	17	187	336	343	894	-62.58	0.013286
-0.08	21	7	11	370	1483	1892	-151.36	0.0281175
-0.09	205	1133	436	56	271	2101	-189.09	0.0312235
-0.1	67	0	327	99	145	638	-63.8	0.00948149
-0.11	0	0	0	105	47	152	-16.72	0.00225891
-0.12	255	10	69	3	411	748	-89.76	0.0111162
-0.13	37	25	30	102	1443	1637	-212.81	0.0243279
-0.14	322	596	206	0	0	1124	-157.36	0.0167041
-0.15	101	0	711	33	0	845	-126.75	0.0125578
-0.16	71	113	48	0	15	247	-39.52	0.00367073
-0.17	355	0	114	63	115	647	-109.99	0.00961524
-0.18	77	116	100	750	154	1197	-215.46	0.0177889
-0.19	59	597	256	73	106	1091	-207.29	0.0162136
-0.2	396	387	290	142	52	1267	-253.4	0.0188292
-0.21	127	35	0	0	0	162	-34.02	0.00240753
-0.22	1188	150	47	0	1	1386	-304.92	0.0205977
-0.23	194	0	0	58	1084	1336	-307.28	0.0198547
-0.24	609	204	56	0	104	973	-233.52	0.01446
-0.25	116	0	352	0	30	498	-124.5	0.00740091
-0.26	93	176	0	20	73	362	-94.12	0.00537978
-0.27	195	0	107	81	29	412	-111.24	0.00612284
-0.28	302	0	0		1580	1882	-526.96	0.0279689
-0.29	30	2	0		89	121	-35.09	0.00179821
-0.3	147	0	207		71	425	-127.5	0.00631604
-0.31	61	0	0		46	107	-33.17	0.00159016
-0.32	392	35	69		0	496	-158.72	0.00737119
-0.33	28	50	0		332	410	-135.3	0.00609312
-0.34	316	197	0		72	585	-198.9	0.00869384
-0.35	0	0	23		66	89	-31.15	0.00132265
-0.36	0	0			206	206	-74.16	0.00306142
-0.37	235	0			51	286	-105.82	0.00425032
-0.38		60			165	225	-85.5	0.00334379
-0.39		258			20	278	-108.42	0.00413143
-0.4		0			192	192	-76.8	0.00285336
-0.41		0			0	0	0	0
-0.42		0			0	0	0	0
-0.43		35			99	134	-57.62	0.00199141
-0.44					77	77	-33.88	0.00114432
-0.45					0	0	0	0
-0.46					313	313	-143.98	0.00465158
-0.47					0	0	0	0
-0.48					337	337	-161.76	0.00500825
-0.49					6	6	-2.94	8.91676e-05
-0.5					90	90	-45	0.00133751
-0.51					93	93	-47.43	0.0013821
-0.52					33	33	-17.16	0.000490422
-0.53					4	4	-2.12	5.94451e-05
						67289	-0.000629226
