# Supplementary material for: Interaction Wave Functions and Interaction-Based Coherence and Entanglement in Complex Adaptive Systems
Source: Research Square preprint supplement (doi:10.21203/rs.3.rs-6846233/v1), 2025-06-16
Supplement: Supplementary file 399 [file 30602-13.xls]

## Sheet: Sheet1
0.58									344	344	199.52	0.00272886
0.57									0	0	0	0
0.56									0	0	0	0
0.55									0	0	0	0
0.54									0	0	0	0
0.53									0	0	0	0
0.52									0	0	0	0
0.51									0	0	0	0
0.5									0	0	0	0
0.49									0	0	0	0
0.48									0	0	0	0
0.47							26		0	26	12.22	0.000206251
0.46							10		0	10	4.6	7.93273e-05
0.45							7		0	7	3.15	5.55291e-05
0.44							0		0	0	0	0
0.43							0		12	12	5.16	9.51928e-05
0.42							4		8	12	5.04	9.51928e-05
0.41						406	0		0	406	166.46	0.00322069
0.4						0	298		0	298	119.2	0.00236395
0.39						0	42		0	42	16.38	0.000333175
0.38						0	129		0	129	49.02	0.00102332
0.37						0	12		0	12	4.44	9.51928e-05
0.36		105				1168	9		0	1282	461.52	0.0101698
0.35	231	55	183			676	97		0	1242	434.7	0.00985245
0.34	0	171	0			986	11		0	1168	397.12	0.00926543
0.33	0	0	24			172	0		0	196	64.68	0.00155482
0.32	0	4	0	35	2300	9	0		16	2364	756.48	0.018753
0.31	0	291	0	65	230	270	41		238	1135	351.85	0.00900365
0.3	0	30	0	25	847	0	69		0	971	291.3	0.00770268
0.29	0	0	40	0	712	0	15		0	767	222.43	0.0060844
0.28	280	0	0	0	80	372	59		92	883	247.24	0.0070046
0.27	779	10	1	94	656	99	15	551	0	2205	595.35	0.0174917
0.26	284	98	3	0	89	1062	197	550	0	2283	593.58	0.0181104
0.25	0	0	902	0	40	479	828	132	2	2383	595.75	0.0189037
0.24	0	174	0	11	55	655	14	13	0	922	221.28	0.00731398
0.23	328	54	44	4	217	230	22	572	64	1535	353.05	0.0121767
0.22	73	0	52	352	621	3	134	386	0	1621	356.62	0.012859
0.21	103	66	0	180	0	310	50	271	0	980	205.8	0.00777408
0.2	76	36	214	205	92	45	211	49	0	928	185.6	0.00736157
0.19	446	0	0	0	0	4	27	25	13	515	97.85	0.00408536
0.18	2405	5	0	0	141	144	19	99	19	2832	509.76	0.0224655
0.17	174	4	0	0	97	91	2	2263	0	2631	447.27	0.020871
0.16	347	896	0	0	70	288	12	0	10	1623	259.68	0.0128748
0.15	4	144	337	24	83	0	4	229	523	1348	202.2	0.0106933
0.14	83	242	231	137	0	0	0	540	206	1439	201.46	0.0114152
0.13	656	54	567	6	29	62	13	0	172	1559	202.67	0.0123671
0.12	39	219	14	396	793	176	110	2381	22	4150	498	0.0329208
0.11	19	1046	327	4	109	955	241	200	92	2993	329.23	0.0237427
0.1	35	49	59	302	2205	227	959	8	56	3900	390	0.0309376
0.09	16	148	435	0	408	297	128	0	80	1512	136.08	0.0119943
0.08	90	49	115	80	455	195	116	47	297	1444	115.52	0.0114549
0.07	276	142	0	450	658	261	23	578	133	2521	176.47	0.0199984
0.06	167	1231	87	27	82	741	176	561	142	3214	192.84	0.0254958
0.05	38	107	402	0	457	345	91	279	131	1850	92.5	0.0146756
0.04	66	28	14	31	121	115	0	43	3	421	16.84	0.00333968
0.03	531	148	655	23	3	119	263	390	1942	4074	122.22	0.0323179
0.02	242	1	46	431	726	43	34	596	122	2241	44.82	0.0177772
0.01	272	285	594	184	33	439	32	689	120	2648	26.48	0.0210059
-4.19803e-16	13	164	244	142	138	0	691	0	220	1612	-6.76723e-13	0.0127876
-0.01	39	117	14	0	242	6	153	0	164	735	-7.35	0.00583056
-0.02	994	60	10	60	428	3	80	6	106	1747	-34.94	0.0138585
-0.03	0	148	13	302	788	111	136	528	26	2052	-61.56	0.016278
-0.04	154	766	67	4	4	1000	17	0	140	2152	-86.08	0.0170712
-0.05	124	117	728	43	8	57	645	0	34	1756	-87.8	0.0139299
-0.06	16	17	61	168	325	343	24	0	104	1058	-63.48	0.00839283
-0.07	11	17	187	336	343	387	338	0	215	1834	-128.38	0.0145486
-0.08	21	7	11	370	1483	95	331	0	11	2329	-186.32	0.0184753
-0.09	205	1133	436	56	271	410	214	0	122	2847	-256.23	0.0225845
-0.1	67	0	327	99	145	20	779	11	203	1651	-165.1	0.0130969
-0.11	0	0	0	105	47	25	166	0	101	444	-48.84	0.00352213
-0.12	255	10	69	3	411	71	61	3	410	1293	-155.16	0.010257
-0.13	37	25	30	102	1443	269	0	164	367	2437	-316.81	0.0193321
-0.14	322	596	206	0	0	168	29	17	3	1341	-187.74	0.0106378
-0.15	101	0	711	33	0	106	706	117	101	1875	-281.25	0.0148739
-0.16	71	113	48	0	15	45	167	29	204	692	-110.72	0.00548945
-0.17	355	0	114	63	115	9	208	38	358	1260	-214.2	0.00999524
-0.18	77	116	100	750	154	0	675	295	240	2407	-433.26	0.0190941
-0.19	59	597	256	73	106	0	450	19	336	1896	-360.24	0.0150405
-0.2	396	387	290	142	52	0	867	14	256	2404	-480.8	0.0190703
-0.21	127	35	0	0	0	17	133	2	146	460	-96.6	0.00364906
-0.22	1188	150	47	0	1	126	109	27	164	1812	-398.64	0.0143741
-0.23	194	0	0	58	1084	41		295	41	1713	-393.99	0.0135888
-0.24	609	204	56	0	104	4452		110	48	5583	-1339.92	0.0442884
-0.25	116	0	352	0	30	163		140	0	801	-200.25	0.00635412
-0.26	93	176	0	20	73	98		43	0	503	-130.78	0.00399016
-0.27	195	0	107	81	29	40		60	0	512	-138.24	0.00406156
-0.28	302	0	0		1580	113		58	0	2053	-574.84	0.0162859
-0.29	30	2	0		89	10		86	0	217	-62.93	0.0017214
-0.3	147	0	207		71	11		59	0	495	-148.5	0.0039267
-0.31	61	0	0		46	156		172	0	435	-134.85	0.00345074
-0.32	392	35	69		0	130		57	0	683	-218.56	0.00541805
-0.33	28	50	0		332	194		304	0	908	-299.64	0.00720292
-0.34	316	197	0		72	445		16	0	1046	-355.64	0.00829764
-0.35	0	0	23		66	2		71	0	162	-56.7	0.0012851
-0.36	0	0			206	20		0	0	226	-81.36	0.0017928
-0.37	235	0			51	0		0	0	286	-105.82	0.00226876
-0.38		60			165	84		116	0	425	-161.5	0.00337141
-0.39		258			20	22		0	0	300	-117	0.00237982
-0.4		0			192	4		0	0	196	-78.4	0.00155482
-0.41		0			0	0		46	0	46	-18.86	0.000364906
-0.42		0			0	0		0	0	0	0	0
-0.43		35			99	69		77	254	534	-229.62	0.00423608
-0.44					77	304		1		382	-168.08	0.0030303
-0.45					0	0		132		132	-59.4	0.00104712
-0.46					313	22		148		483	-222.18	0.00383151
-0.47					0	0		59		59	-27.73	0.000468031
-0.48					337	0		208		545	-261.6	0.00432334
-0.49					6	57		170		233	-114.17	0.00184833
-0.5					90	0		99		189	-94.5	0.00149929
-0.51					93	143		86		322	-164.22	0.00255434
-0.52					33	53		45		131	-68.12	0.00103919
-0.53					4	119		129		252	-133.56	0.00199905
-0.54						176		0		176	-95.04	0.00139616
-0.55						60		20		80	-44	0.000634618
-0.56						211		12		223	-124.88	0.001769
-0.57						0		0		0	0	0
-0.58						0		120		120	-69.6	0.000951928
-0.59						50		0		50	-29.5	0.000396637
-0.6								8		8	-4.8	6.34618e-05
-0.61								62		62	-37.82	0.000491829
-0.62								29		29	-17.98	0.000230049
-0.63								268		268	-168.84	0.00212597
-0.64								20		20	-12.8	0.000158655
										126060	0.000426067
