# Supplementary material for: Interaction Wave Functions and Interaction-Based Coherence and Entanglement in Complex Adaptive Systems
Source: Research Square preprint supplement (doi:10.21203/rs.3.rs-6846233/v1), 2025-06-16
Supplement: Supplementary file 400 [file 30602.xls]

## Sheet: Sheet1
20.37	231	4705.47	0.0149903		0.35
20.36	0	0	0		0.34
20.35	0	0	0		0.33
20.34	0	0	0		0.32
20.33	0	0	0		0.31
20.32	0	0	0		0.3
20.31	0	0	0		0.29
20.3	280	5684	0.01817		0.28
20.29	779	15805.9	0.0505516		0.27
20.28	284	5759.52	0.0184296		0.26
20.27	0	0	0		0.25
20.26	0	0	0		0.24
20.25	328	6642	0.0212849		0.23
20.24	73	1477.52	0.00473718		0.22
20.23	103	2083.69	0.00668397		0.21
20.22	76	1536.72	0.00493186		0.2
20.21	446	9013.66	0.0289422		0.19
20.2	2405	48581	0.156067		0.18
20.19	174	3513.06	0.0112914		0.17
20.18	347	7002.46	0.0225178		0.16
20.17	4	80.68	0.000259572		0.15
20.16	83	1673.28	0.00538611		0.14
20.15	656	13218.4	0.0425698		0.13
20.14	39	785.46	0.00253082		0.12
20.13	19	382.47	0.00123297		0.11
20.12	35	704.2	0.00227125		0.1
20.11	16	321.76	0.00103829		0.09
20.1	90	1809	0.00584036		0.08
20.09	276	5544.84	0.0179104		0.07
20.08	167	3353.36	0.0108371		0.06
20.07	38	762.66	0.00246593		0.05
20.06	66	1323.96	0.00428293		0.04
20.05	531	10646.5	0.0344581		0.03
20.04	242	4849.68	0.0157041		0.02
20.03	272	5448.16	0.0176509		0.01
20.02	13	260.26	0.000843608		-5.32907e-14
20.01	39	780.39	0.00253082		-0.01
20	994	19880	0.0645036		-0.02
19.99	0	0	0		-0.03
19.98	154	3076.92	0.00999351		-0.04
19.97	124	2476.28	0.00804672		-0.05
19.96	16	319.36	0.00103829		-0.06
19.95	11	219.45	0.000713822		-0.07
19.94	21	418.74	0.00136275		-0.08
19.93	205	4085.65	0.013303		-0.09
19.92	67	1334.64	0.00434783		-0.1
19.91	0	0	0		-0.11
19.9	255	5074.5	0.0165477		-0.12
19.89	37	735.93	0.00240104		-0.13
19.88	322	6401.36	0.0208955		-0.14
19.87	101	2006.87	0.00655419		-0.15
19.86	71	1410.06	0.0046074		-0.16
19.85	355	7046.75	0.023037		-0.17
19.84	77	1527.68	0.00499676		-0.18
19.83	59	1169.97	0.00382868		-0.19
19.82	396	7848.72	0.0256976		-0.2
19.81	127	2515.87	0.0082414		-0.21
19.8	1188	23522.4	0.0770928		-0.22
19.79	194	3839.26	0.0125892		-0.23
19.78	609	12046	0.0395198		-0.24
19.77	116	2293.32	0.00752758		-0.25
19.76	93	1837.68	0.00603504		-0.26
19.75	195	3851.25	0.0126541		-0.27
19.74	302	5961.48	0.0195977		-0.28
19.73	30	591.9	0.00194679		-0.29
19.72	147	2898.84	0.00953926		-0.3
19.71	61	1202.31	0.00395847		-0.31
19.7	392	7722.4	0.025438		-0.32
19.69	28	551.32	0.001817		-0.33
19.68	316	6218.88	0.0205062		-0.34
19.67	0	0	0		-0.35
19.66	0	0	0		-0.36
19.65	235	4617.75	0.0152498		-0.37
	15410	20.0165
