# Supplementary material for: Interaction Wave Functions and Interaction-Based Coherence and Entanglement in Complex Adaptive Systems
Source: Research Square preprint supplement (doi:10.21203/rs.3.rs-6846233/v1), 2025-06-16
Supplement: Supplementary file 401 [file 30603.xls]

## Sheet: Sheet1
20	105	2100	0.00914316		0.36
19.99	55	1099.45	0.00478927		0.35
19.98	171	3416.58	0.0148903		0.34
19.97	0	0	0		0.33
19.96	4	79.84	0.000348311		0.32
19.95	291	5805.45	0.0253396		0.31
19.94	30	598.2	0.00261233		0.3
19.93	0	0	0		0.29
19.92	0	0	0		0.28
19.91	10	199.1	0.000870777		0.27
19.9	98	1950.2	0.00853361		0.26
19.89	0	0	0		0.25
19.88	174	3459.12	0.0151515		0.24
19.87	54	1072.98	0.00470219		0.23
19.86	0	0	0		0.22
19.85	66	1310.1	0.00574713		0.21
19.84	36	714.24	0.0031348		0.2
19.83	0	0	0		0.19
19.82	5	99.1	0.000435388		0.18
19.81	4	79.24	0.000348311		0.17
19.8	896	17740.8	0.0780216		0.16
19.79	144	2849.76	0.0125392		0.15
19.78	242	4786.76	0.0210728		0.14
19.77	54	1067.58	0.00470219		0.13
19.76	219	4327.44	0.01907		0.12
19.75	1046	20658.5	0.0910832		0.11
19.74	49	967.26	0.00426681		0.1
19.73	148	2920.04	0.0128875		0.09
19.72	49	966.28	0.00426681		0.08
19.71	142	2798.82	0.012365		0.07
19.7	1231	24250.7	0.107193		0.06
19.69	107	2106.83	0.00931731		0.05
19.68	28	551.04	0.00243817		0.04
19.67	148	2911.16	0.0128875		0.03
19.66	1	19.66	8.70777e-05		0.02
19.65	285	5600.25	0.0248171		0.01
19.64	164	3220.96	0.0142807		-5.68434e-14
19.63	117	2296.71	0.0101881		-0.01
19.62	60	1177.2	0.00522466		-0.02
19.61	148	2902.28	0.0128875		-0.03
19.6	766	15013.6	0.0667015		-0.04
19.59	117	2292.03	0.0101881		-0.05
19.58	17	332.86	0.00148032		-0.06
19.57	17	332.69	0.00148032		-0.07
19.56	7	136.92	0.000609544		-0.08
19.55	1133	22150.1	0.098659		-0.09
19.54	0	0	0		-0.1
19.53	0	0	0		-0.11
19.52	10	195.2	0.000870777		-0.12
19.51	25	487.75	0.00217694		-0.13
19.5	596	11622	0.0518983		-0.14
19.49	0	0	0		-0.15
19.48	113	2201.24	0.00983978		-0.16
19.47	0	0	0		-0.17
19.46	116	2257.36	0.010101		-0.18
19.45	597	11611.6	0.0519854		-0.19
19.44	387	7523.28	0.0336991		-0.2
19.43	35	680.05	0.00304772		-0.21
19.42	150	2913	0.0130617		-0.22
19.41	0	0	0		-0.23
19.4	204	3957.6	0.0177638		-0.24
19.39	0	0	0		-0.25
19.38	176	3410.88	0.0153257		-0.26
19.37	0	0	0		-0.27
19.36	0	0	0		-0.28
19.35	2	38.7	0.000174155		-0.29
19.34	0	0	0		-0.3
19.33	0	0	0		-0.31
19.32	35	676.2	0.00304772		-0.32
19.31	50	965.5	0.00435388		-0.33
19.3	197	3802.1	0.0171543		-0.34
19.29	0	0	0		-0.35
19.28	0	0	0		-0.36
19.27	0	0	0		-0.37
19.26	60	1155.6	0.00522466		-0.38
19.25	258	4966.5	0.022466		-0.39
19.24	0	0	0		-0.4
19.23	0	0	0		-0.41
19.22	0	0	0		-0.42
19.21	35	672.35	0.00304772		-0.43
	11484	19.6359
