# Supplementary material for: Interaction Wave Functions and Interaction-Based Coherence and Entanglement in Complex Adaptive Systems
Source: Research Square preprint supplement (doi:10.21203/rs.3.rs-6846233/v1), 2025-06-16
Supplement: Supplementary file 402 [file 30604.xls]

## Sheet: Sheet1
20.1	183	3678.3	0.0180669		0.35
20.09	0	0	0		0.34
20.08	24	481.92	0.00236943		0.33
20.07	0	0	0		0.32
20.06	0	0	0		0.31
20.05	0	0	0		0.3
20.04	40	801.6	0.00394906		0.29
20.03	0	0	0		0.28
20.02	1	20.02	9.87264e-05		0.27
20.01	3	60.03	0.000296179		0.26
20	902	18040	0.0890512		0.25
19.99	0	0	0		0.24
19.98	44	879.12	0.00434396		0.23
19.97	52	1038.44	0.00513377		0.22
19.96	0	0	0		0.21
19.95	214	4269.3	0.0211275		0.2
19.94	0	0	0		0.19
19.93	0	0	0		0.18
19.92	0	0	0		0.17
19.91	0	0	0		0.16
19.9	337	6706.3	0.0332708		0.15
19.89	231	4594.59	0.0228058		0.14
19.88	567	11272	0.0559779		0.13
19.87	14	278.18	0.00138217		0.12
19.86	327	6494.22	0.0322835		0.11
19.85	59	1171.15	0.00582486		0.1
19.84	435	8630.4	0.042946		0.09
19.83	115	2280.45	0.0113535		0.08
19.82	0	0	0		0.07
19.81	87	1723.47	0.0085892		0.06
19.8	402	7959.6	0.039688		0.05
19.79	14	277.06	0.00138217		0.04
19.78	655	12955.9	0.0646658		0.03
19.77	46	909.42	0.00454142		0.02
19.76	594	11737.4	0.0586435		0.01
19.75	244	4819	0.0240892		-5.32907e-14
19.74	14	276.36	0.00138217		-0.01
19.73	10	197.3	0.000987264		-0.02
19.72	13	256.36	0.00128344		-0.03
19.71	67	1320.57	0.00661467		-0.04
19.7	728	14341.6	0.0718728		-0.05
19.69	61	1201.09	0.00602231		-0.06
19.68	187	3680.16	0.0184618		-0.07
19.67	11	216.37	0.00108599		-0.08
19.66	436	8571.76	0.0430447		-0.09
19.65	327	6425.55	0.0322835		-0.1
19.64	0	0	0		-0.11
19.63	69	1354.47	0.00681212		-0.12
19.62	30	588.6	0.00296179		-0.13
19.61	206	4039.66	0.0203376		-0.14
19.6	711	13935.6	0.0701945		-0.15
19.59	48	940.32	0.00473887		-0.16
19.58	114	2232.12	0.0112548		-0.17
19.57	100	1957	0.00987264		-0.18
19.56	256	5007.36	0.025274		-0.19
19.55	290	5669.5	0.0286307		-0.2
19.54	0	0	0		-0.21
19.53	47	917.91	0.00464014		-0.22
19.52	0	0	0		-0.23
19.51	56	1092.56	0.00552868		-0.24
19.5	352	6864	0.0347517		-0.25
19.49	0	0	0		-0.26
19.48	107	2084.36	0.0105637		-0.27
19.47	0	0	0		-0.28
19.46	0	0	0		-0.29
19.45	207	4026.15	0.0204364		-0.3
19.44	0	0	0		-0.31
19.43	69	1340.67	0.00681212		-0.32
19.42	0	0	0		-0.33
19.41	0	0	0		-0.34
19.4	23	446.2	0.00227071		-0.35
	10129	19.7514
