# Supplementary material for: Interaction Wave Functions and Interaction-Based Coherence and Entanglement in Complex Adaptive Systems
Source: Research Square preprint supplement (doi:10.21203/rs.3.rs-6846233/v1), 2025-06-16
Supplement: Supplementary file 403 [file 30605.xls]

## Sheet: Sheet1
20.1	35	703.5	0.00576037		0.32
20.09	65	1305.85	0.0106978		0.31
20.08	25	502	0.00411455		0.3
20.07	0	0	0		0.29
20.06	0	0	0		0.28
20.05	94	1884.7	0.0154707		0.27
20.04	0	0	0		0.26
20.03	0	0	0		0.25
20.02	11	220.22	0.0018104		0.24
20.01	4	80.04	0.000658328		0.23
20	352	7040	0.0579329		0.22
19.99	180	3598.2	0.0296248		0.21
19.98	205	4095.9	0.0337393		0.2
19.97	0	0	0		0.19
19.96	0	0	0		0.18
19.95	0	0	0		0.17
19.94	0	0	0		0.16
19.93	24	478.32	0.00394997		0.15
19.92	137	2729.04	0.0225477		0.14
19.91	6	119.46	0.000987492		0.13
19.9	396	7880.4	0.0651745		0.12
19.89	4	79.56	0.000658328		0.11
19.88	302	6003.76	0.0497038		0.1
19.87	0	0	0		0.09
19.86	80	1588.8	0.0131666		0.08
19.85	450	8932.5	0.0740619		0.07
19.84	27	535.68	0.00444371		0.06
19.83	0	0	0		0.05
19.82	31	614.42	0.00510204		0.04
19.81	23	455.63	0.00378539		0.03
19.8	431	8533.8	0.0709348		0.02
19.79	184	3641.36	0.0302831		0.01
19.78	142	2808.76	0.0233706		-4.9738e-14
19.77	0	0	0		-0.01
19.76	60	1185.6	0.00987492		-0.02
19.75	302	5964.5	0.0497038		-0.03
19.74	4	78.96	0.000658328		-0.04
19.73	43	848.39	0.00707702		-0.05
19.72	168	3312.96	0.0276498		-0.06
19.71	336	6622.56	0.0552995		-0.07
19.7	370	7289	0.0608953		-0.08
19.69	56	1102.64	0.00921659		-0.09
19.68	99	1948.32	0.0162936		-0.1
19.67	105	2065.35	0.0172811		-0.11
19.66	3	58.98	0.000493746		-0.12
19.65	102	2004.3	0.0167874		-0.13
19.64	0	0	0		-0.14
19.63	33	647.79	0.0054312		-0.15
19.62	0	0	0		-0.16
19.61	63	1235.43	0.0103687		-0.17
19.6	750	14700	0.123436		-0.18
19.59	73	1430.07	0.0120145		-0.19
19.58	142	2780.36	0.0233706		-0.2
19.57	0	0	0		-0.21
19.56	0	0	0		-0.22
19.55	58	1133.9	0.00954575		-0.23
19.54	0	0	0		-0.24
19.53	0	0	0		-0.25
19.52	20	390.4	0.00329164		-0.26
19.51	81	1580.31	0.0133311		-0.27
	6076	19.7847
