# Supplementary material for: Interaction Wave Functions and Interaction-Based Coherence and Entanglement in Complex Adaptive Systems
Source: Research Square preprint supplement (doi:10.21203/rs.3.rs-6846233/v1), 2025-06-16
Supplement: Supplementary file 404 [file 30606.xls]

## Sheet: Sheet1
20.4	2300	46920	0.0950806		0.32
20.39	230	4689.7	0.00950806		0.31
20.38	847	17261.9	0.0350145		0.3
20.37	712	14503.4	0.0294337		0.29
20.36	80	1628.8	0.00330715		0.28
20.35	656	13349.6	0.0271186		0.27
20.34	89	1810.26	0.00367921		0.26
20.33	40	813.2	0.00165358		0.25
20.32	55	1117.6	0.00227367		0.24
20.31	217	4407.27	0.00897065		0.23
20.3	621	12606.3	0.0256718		0.22
20.29	0	0	0		0.21
20.28	92	1865.76	0.00380322		0.2
20.27	0	0	0		0.19
20.26	141	2856.66	0.00582885		0.18
20.25	97	1964.25	0.00400992		0.17
20.24	70	1416.8	0.00289376		0.16
20.23	83	1679.09	0.00343117		0.15
20.22	0	0	0		0.14
20.21	29	586.09	0.00119884		0.13
20.2	793	16018.6	0.0327821		0.12
20.19	109	2200.71	0.00450599		0.11
20.18	2205	44496.9	0.0911534		0.1
20.17	408	8229.36	0.0168665		0.09
20.16	455	9172.8	0.0188094		0.08
20.15	658	13258.7	0.0272013		0.07
20.14	82	1651.48	0.00338983		0.06
20.13	457	9199.41	0.0188921		0.05
20.12	121	2434.52	0.00500207		0.04
20.11	3	60.33	0.000124018		0.03
20.1	726	14592.6	0.0300124		0.02
20.09	33	662.97	0.0013642		0.01
20.08	138	2771.04	0.00570484		-4.9738e-14
20.07	242	4856.94	0.0100041		-0.01
20.06	428	8585.68	0.0176933		-0.02
20.05	788	15799.4	0.0325754		-0.03
20.04	4	80.16	0.000165358		-0.04
20.03	8	160.24	0.000330715		-0.05
20.02	325	6506.5	0.0134353		-0.06
20.01	343	6863.43	0.0141794		-0.07
20	1483	29660	0.0613063		-0.08
19.99	271	5417.29	0.011203		-0.09
19.98	145	2897.1	0.00599421		-0.1
19.97	47	938.59	0.00194295		-0.11
19.96	411	8203.56	0.0169905		-0.12
19.95	1443	28787.8	0.0596527		-0.13
19.94	0	0	0		-0.14
19.93	0	0	0		-0.15
19.92	15	298.8	0.000620091		-0.16
19.91	115	2289.65	0.00475403		-0.17
19.9	154	3064.6	0.00636627		-0.18
19.89	106	2108.34	0.00438198		-0.19
19.88	52	1033.76	0.00214965		-0.2
19.87	0	0	0		-0.21
19.86	1	19.86	4.13394e-05		-0.22
19.85	1084	21517.4	0.0448119		-0.23
19.84	104	2063.36	0.0042993		-0.24
19.83	30	594.9	0.00124018		-0.25
19.82	73	1446.86	0.00301778		-0.26
19.81	29	574.49	0.00119884		-0.27
19.8	1580	31284	0.0653162		-0.28
19.79	89	1761.31	0.00367921		-0.29
19.78	71	1404.38	0.0029351		-0.3
19.77	46	909.42	0.00190161		-0.31
19.76	0	0	0		-0.32
19.75	332	6557	0.0137247		-0.33
19.74	72	1421.28	0.00297644		-0.34
19.73	66	1302.18	0.0027284		-0.35
19.72	206	4062.32	0.00851592		-0.36
19.71	51	1005.21	0.00210831		-0.37
19.7	165	3250.5	0.006821		-0.38
19.69	20	393.8	0.000826788		-0.39
19.68	192	3778.56	0.00793716		-0.4
19.67	0	0	0		-0.41
19.66	0	0	0		-0.42
19.65	99	1945.35	0.0040926		-0.43
19.64	77	1512.28	0.00318313		-0.44
19.63	0	0	0		-0.45
19.62	313	6141.06	0.0129392		-0.46
19.61	0	0	0		-0.47
19.6	337	6605.2	0.0139314		-0.48
19.59	6	117.54	0.000248036		-0.49
19.58	90	1762.2	0.00372055		-0.5
19.57	93	1820.01	0.00384456		-0.51
19.56	33	645.48	0.0013642		-0.52
19.55	4	78.2	0.000165358		-0.53
	24190	20.0807
