# Supplementary material for: Interaction Wave Functions and Interaction-Based Coherence and Entanglement in Complex Adaptive Systems
Source: Research Square preprint supplement (doi:10.21203/rs.3.rs-6846233/v1), 2025-06-16
Supplement: Supplementary file 405 [file 30609-13.xls]

## Sheet: Sheet1
0.58				344	344	199.52	0.00585323
0.57				0	0	0	0
0.56				0	0	0	0
0.55				0	0	0	0
0.54				0	0	0	0
0.53				0	0	0	0
0.52				0	0	0	0
0.51				0	0	0	0
0.5				0	0	0	0
0.49				0	0	0	0
0.48				0	0	0	0
0.47		26		0	26	12.22	0.000442395
0.46		10		0	10	4.6	0.000170152
0.45		7		0	7	3.15	0.000119106
0.44		0		0	0	0	0
0.43		0		12	12	5.16	0.000204182
0.42		4		8	12	5.04	0.000204182
0.41	406	0		0	406	166.46	0.00690817
0.4	0	298		0	298	119.2	0.00507053
0.39	0	42		0	42	16.38	0.000714638
0.38	0	129		0	129	49.02	0.00219496
0.37	0	12		0	12	4.44	0.000204182
0.36	1168	9		0	1177	423.72	0.0200269
0.35	676	97		0	773	270.55	0.0131527
0.34	986	11		0	997	338.98	0.0169641
0.33	172	0		0	172	56.76	0.00292661
0.32	9	0		16	25	8	0.00042538
0.31	270	41		238	549	170.19	0.00934134
0.3	0	69		0	69	20.7	0.00117405
0.29	0	15		0	15	4.35	0.000255228
0.28	372	59		92	523	146.44	0.00889895
0.27	99	15	551	0	665	179.55	0.0113151
0.26	1062	197	550	0	1809	470.34	0.0307805
0.25	479	828	132	2	1441	360.25	0.0245189
0.24	655	14	13	0	682	163.68	0.0116044
0.23	230	22	572	64	888	204.24	0.0151095
0.22	3	134	386	0	523	115.06	0.00889895
0.21	310	50	271	0	631	132.51	0.0107366
0.2	45	211	49	0	305	61	0.00518963
0.19	4	27	25	13	69	13.11	0.00117405
0.18	144	19	99	19	281	50.58	0.00478127
0.17	91	2	2263	0	2356	400.52	0.0400878
0.16	288	12	0	10	310	49.6	0.00527471
0.15	0	4	229	523	756	113.4	0.0128635
0.14	0	0	540	206	746	104.44	0.0126933
0.13	62	13	0	172	247	32.11	0.00420275
0.12	176	110	2381	22	2689	322.68	0.0457539
0.11	955	241	200	92	1488	163.68	0.0253186
0.1	227	959	8	56	1250	125	0.021269
0.09	297	128	0	80	505	45.45	0.00859267
0.08	195	116	47	297	655	52.4	0.011145
0.07	261	23	578	133	995	69.65	0.0169301
0.06	741	176	561	142	1620	97.2	0.0275646
0.05	345	91	279	131	846	42.3	0.0143949
0.04	115	0	43	3	161	6.44	0.00273945
0.03	119	263	390	1942	2714	81.42	0.0461792
0.02	43	34	596	122	795	15.9	0.0135271
0.01	439	32	689	120	1280	12.8	0.0217794
-4.19803e-16	0	691	0	220	911	-3.82441e-13	0.0155008
-0.01	6	153	0	164	323	-3.23	0.00549591
-0.02	3	80	6	106	195	-3.9	0.00331796
-0.03	111	136	528	26	801	-24.03	0.0136292
-0.04	1000	17	0	140	1157	-46.28	0.0196866
-0.05	57	645	0	34	736	-36.8	0.0125232
-0.06	343	24	0	104	471	-28.26	0.00801416
-0.07	387	338	0	215	940	-65.8	0.0159943
-0.08	95	331	0	11	437	-34.96	0.00743564
-0.09	410	214	0	122	746	-67.14	0.0126933
-0.1	20	779	11	203	1013	-101.3	0.0172364
-0.11	25	166	0	101	292	-32.12	0.00496844
-0.12	71	61	3	410	545	-65.4	0.00927328
-0.13	269	0	164	367	800	-104	0.0136122
-0.14	168	29	17	3	217	-30.38	0.0036923
-0.15	106	706	117	101	1030	-154.5	0.0175257
-0.16	45	167	29	204	445	-71.2	0.00757176
-0.17	9	208	38	358	613	-104.21	0.0104303
-0.18	0	675	295	240	1210	-217.8	0.0205884
-0.19	0	450	19	336	805	-152.95	0.0136972
-0.2	0	867	14	256	1137	-227.4	0.0193463
-0.21	17	133	2	146	298	-62.58	0.00507053
-0.22	126	109	27	164	426	-93.72	0.00724847
-0.23	41		295	41	377	-86.71	0.00641473
-0.24	4452		110	48	4610	-1106.4	0.07844
-0.25	163		140	0	303	-75.75	0.0051556
-0.26	98		43	0	141	-36.66	0.00239914
-0.27	40		60	0	100	-27	0.00170152
-0.28	113		58	0	171	-47.88	0.0029096
-0.29	10		86	0	96	-27.84	0.00163346
-0.3	11		59	0	70	-21	0.00119106
-0.31	156		172	0	328	-101.68	0.00558098
-0.32	130		57	0	187	-59.84	0.00318184
-0.33	194		304	0	498	-164.34	0.00847357
-0.34	445		16	0	461	-156.74	0.007844
-0.35	2		71	0	73	-25.55	0.00124211
-0.36	20		0	0	20	-7.2	0.000340304
-0.37	0		0	0	0	0	0
-0.38	84		116	0	200	-76	0.00340304
-0.39	22		0	0	22	-8.58	0.000374334
-0.4	4		0	0	4	-1.6	6.80608e-05
-0.41	0		46	0	46	-18.86	0.000782699
-0.42	0		0	0	0	0	0
-0.43	69		77	254	400	-172	0.00680608
-0.44	304		1		305	-134.2	0.00518963
-0.45	0		132		132	-59.4	0.00224601
-0.46	22		148		170	-78.2	0.00289258
-0.47	0		59		59	-27.73	0.0010039
-0.48	0		208		208	-99.84	0.00353916
-0.49	57		170		227	-111.23	0.00386245
-0.5	0		99		99	-49.5	0.0016845
-0.51	143		86		229	-116.79	0.00389648
-0.52	53		45		98	-50.96	0.00166749
-0.53	119		129		248	-131.44	0.00421977
-0.54	176		0		176	-95.04	0.00299467
-0.55	60		20		80	-44	0.00136122
-0.56	211		12		223	-124.88	0.00379439
-0.57	0		0		0	0	0
-0.58	0		120		120	-69.6	0.00204182
-0.59	50		0		50	-29.5	0.00085076
-0.6			8		8	-4.8	0.000136122
-0.61			62		62	-37.82	0.00105494
-0.62			29		29	-17.98	0.000493441
-0.63			268		268	-168.84	0.00456007
-0.64			20		20	-12.8	0.000340304
					58771	0.00163431
