# Supplementary material for: Interaction Wave Functions and Interaction-Based Coherence and Entanglement in Complex Adaptive Systems
Source: Research Square preprint supplement (doi:10.21203/rs.3.rs-6846233/v1), 2025-06-16
Supplement: Supplementary file 406 [file 30609.xls]

## Sheet: Sheet1
20.65	406	8383.9	0.0184873		0.41
20.64	0	0	0		0.4
20.63	0	0	0		0.39
20.62	0	0	0		0.38
20.61	0	0	0		0.37
20.6	1168	24060.8	0.0531852		0.36
20.59	676	13918.8	0.0307818		0.35
20.58	986	20291.9	0.0448978		0.34
20.57	172	3538.04	0.00783207		0.33
20.56	9	185.04	0.000409817		0.32
20.55	270	5548.5	0.0122945		0.31
20.54	0	0	0		0.3
20.53	0	0	0		0.29
20.52	372	7633.44	0.0169391		0.28
20.51	99	2030.49	0.00450799		0.27
20.5	1062	21771	0.0483585		0.26
20.49	479	9814.71	0.0218114		0.25
20.48	655	13414.4	0.0298256		0.24
20.47	230	4708.1	0.0104731		0.23
20.46	3	61.38	0.000136606		0.22
20.45	310	6339.5	0.0141159		0.21
20.44	45	919.8	0.00204909		0.2
20.43	4	81.72	0.000182141		0.19
20.42	144	2940.48	0.00655708		0.18
20.41	91	1857.31	0.00414371		0.17
20.4	288	5875.2	0.0131142		0.16
20.39	0	0	0		0.15
20.38	0	0	0		0.14
20.37	62	1262.94	0.00282319		0.13
20.36	176	3583.36	0.00801421		0.12
20.35	955	19434.2	0.0434862		0.11
20.34	227	4617.18	0.0103365		0.1
20.33	297	6038.01	0.013524		0.09
20.32	195	3962.4	0.00887938		0.08
20.31	261	5300.91	0.0118847		0.07
20.3	741	15042.3	0.0337416		0.06
20.29	345	7000.05	0.0157097		0.05
20.28	115	2332.2	0.00523656		0.04
20.27	119	2412.13	0.0054187		0.03
20.26	43	871.18	0.00195802		0.02
20.25	439	8889.75	0.01999		0.01
20.24	0	0	0		-6.39488e-14
20.23	6	121.38	0.000273212		-0.01
20.22	3	60.66	0.000136606		-0.02
20.21	111	2243.31	0.00505441		-0.03
20.2	1000	20200	0.0455353		-0.04
20.19	57	1150.83	0.00259551		-0.05
20.18	343	6921.74	0.0156186		-0.06
20.17	387	7805.79	0.0176221		-0.07
20.16	95	1915.2	0.00432585		-0.08
20.15	410	8261.5	0.0186695		-0.09
20.14	20	402.8	0.000910705		-0.1
20.13	25	503.25	0.00113838		-0.11
20.12	71	1428.52	0.003233		-0.12
20.11	269	5409.59	0.012249		-0.13
20.1	168	3376.8	0.00764992		-0.14
20.09	106	2129.54	0.00482674		-0.15
20.08	45	903.6	0.00204909		-0.16
20.07	9	180.63	0.000409817		-0.17
20.06	0	0	0		-0.18
20.05	0	0	0		-0.19
20.04	0	0	0		-0.2
20.03	17	340.51	0.0007741		-0.21
20.02	126	2522.52	0.00573744		-0.22
20.01	41	820.41	0.00186695		-0.23
20	4452	89040	0.202723		-0.24
19.99	163	3258.37	0.00742225		-0.25
19.98	98	1958.04	0.00446246		-0.26
19.97	40	798.8	0.00182141		-0.27
19.96	113	2255.48	0.00514549		-0.28
19.95	10	199.5	0.000455353		-0.29
19.94	11	219.34	0.000500888		-0.3
19.93	156	3109.08	0.0071035		-0.31
19.92	130	2589.6	0.00591958		-0.32
19.91	194	3862.54	0.00883384		-0.33
19.9	445	8855.5	0.0202632		-0.34
19.89	2	39.78	9.10705e-05		-0.35
19.88	20	397.6	0.000910705		-0.36
19.87	0	0	0		-0.37
19.86	84	1668.24	0.00382496		-0.38
19.85	22	436.7	0.00100178		-0.39
19.84	4	79.36	0.000182141		-0.4
19.83	0	0	0		-0.41
19.82	0	0	0		-0.42
19.81	69	1366.89	0.00314193		-0.43
19.8	304	6019.2	0.0138427		-0.44
19.79	0	0	0		-0.45
19.78	22	435.16	0.00100178		-0.46
19.77	0	0	0		-0.47
19.76	0	0	0		-0.48
19.75	57	1125.75	0.00259551		-0.49
19.74	0	0	0		-0.5
19.73	143	2821.39	0.00651154		-0.51
19.72	53	1045.16	0.00241337		-0.52
19.71	119	2345.49	0.0054187		-0.53
19.7	176	3467.2	0.00801421		-0.54
19.69	60	1181.4	0.00273212		-0.55
19.68	211	4152.48	0.00960794		-0.56
19.67	0	0	0		-0.57
19.66	0	0	0		-0.58
19.65	50	982.5	0.00227676		-0.59
	21961	20.2418
