# Supplementary material for: Interaction Wave Functions and Interaction-Based Coherence and Entanglement in Complex Adaptive Systems
Source: Research Square preprint supplement (doi:10.21203/rs.3.rs-6846233/v1), 2025-06-16
Supplement: Supplementary file 407 [file 30610.xls]

## Sheet: Sheet1
20.37	26	529.62	0.00225518		0.47
20.36	10	203.6	0.000867378		0.46
20.35	7	142.45	0.000607165		0.45
20.34	0	0	0		0.44
20.33	0	0	0		0.43
20.32	4	81.28	0.000346951		0.42
20.31	0	0	0		0.41
20.3	298	6049.4	0.0258479		0.4
20.29	42	852.18	0.00364299		0.39
20.28	129	2616.12	0.0111892		0.38
20.27	12	243.24	0.00104085		0.37
20.26	9	182.34	0.00078064		0.36
20.25	97	1964.25	0.00841357		0.35
20.24	11	222.64	0.000954116		0.34
20.23	0	0	0		0.33
20.22	0	0	0		0.32
20.21	41	828.61	0.00355625		0.31
20.2	69	1393.8	0.00598491		0.3
20.19	15	302.85	0.00130107		0.29
20.18	59	1190.62	0.00511753		0.28
20.17	15	302.55	0.00130107		0.27
20.16	197	3971.52	0.0170873		0.26
20.15	828	16684.2	0.0718189		0.25
20.14	14	281.96	0.00121433		0.24
20.13	22	442.86	0.00190823		0.23
20.12	134	2696.08	0.0116229		0.22
20.11	50	1005.5	0.00433689		0.21
20.1	211	4241.1	0.0183017		0.2
20.09	27	542.43	0.00234192		0.19
20.08	19	381.52	0.00164802		0.18
20.07	2	40.14	0.000173476		0.17
20.06	12	240.72	0.00104085		0.16
20.05	4	80.2	0.000346951		0.15
20.04	0	0	0		0.14
20.03	13	260.39	0.00112759		0.13
20.02	110	2202.2	0.00954116		0.12
20.01	241	4822.41	0.0209038		0.11
20	959	19180	0.0831815		0.1
19.99	128	2558.72	0.0111024		0.09
19.98	116	2317.68	0.0100616		0.08
19.97	23	459.31	0.00199497		0.07
19.96	176	3512.96	0.0152659		0.06
19.95	91	1815.45	0.00789314		0.05
19.94	0	0	0		0.04
19.93	263	5241.59	0.022812		0.03
19.92	34	677.28	0.00294908		0.02
19.91	32	637.12	0.00277561		0.01
19.9	691	13750.9	0.0599358		-7.10543e-14
19.89	153	3043.17	0.0132709		-0.01
19.88	80	1590.4	0.00693902		-0.02
19.87	136	2702.32	0.0117963		-0.03
19.86	17	337.62	0.00147454		-0.04
19.85	645	12803.2	0.0559459		-0.05
19.84	24	476.16	0.00208171		-0.06
19.83	338	6702.54	0.0293174		-0.07
19.82	331	6560.42	0.0287102		-0.08
19.81	214	4239.34	0.0185619		-0.09
19.8	779	15424.2	0.0675687		-0.1
19.79	166	3285.14	0.0143985		-0.11
19.78	61	1206.58	0.00529101		-0.12
19.77	0	0	0		-0.13
19.76	29	573.04	0.0025154		-0.14
19.75	706	13943.5	0.0612369		-0.15
19.74	167	3296.58	0.0144852		-0.16
19.73	208	4103.84	0.0180415		-0.17
19.72	675	13311	0.058548		-0.18
19.71	450	8869.5	0.039032		-0.19
19.7	867	17079.9	0.0752017		-0.2
19.69	133	2618.77	0.0115361		-0.21
19.68	109	2145.12	0.00945442		-0.22
	11529	19.903
