# Supplementary material for: Interaction Wave Functions and Interaction-Based Coherence and Entanglement in Complex Adaptive Systems
Source: Research Square preprint supplement (doi:10.21203/rs.3.rs-6846233/v1), 2025-06-16
Supplement: Supplementary file 408 [file 30611.xls]

## Sheet: Sheet1
20.6	551	11350.6	0.0343345		0.27
20.59	550	11324.5	0.0342722		0.26
20.58	132	2716.56	0.00822532		0.25
20.57	13	267.41	0.00081007		0.24
20.56	572	11760.3	0.0356431		0.23
20.55	386	7932.3	0.0240528		0.22
20.54	271	5566.34	0.0168868		0.21
20.53	49	1005.97	0.00305334		0.2
20.52	25	513	0.00155783		0.19
20.51	99	2030.49	0.00616899		0.18
20.5	2263	46391.5	0.141014		0.17
20.49	0	0	0		0.16
20.48	229	4689.92	0.0142697		0.15
20.47	540	11053.8	0.0336491		0.14
20.46	0	0	0		0.13
20.45	2381	48691.4	0.148367		0.12
20.44	200	4088	0.0124626		0.11
20.43	8	163.44	0.000498504		0.1
20.42	0	0	0		0.09
20.41	47	959.27	0.00292871		0.08
20.4	578	11791.2	0.0360169		0.07
20.39	561	11438.8	0.0349576		0.06
20.38	279	5686.02	0.0173853		0.05
20.37	43	875.91	0.00267946		0.04
20.36	390	7940.4	0.0243021		0.03
20.35	596	12128.6	0.0371386		0.02
20.34	689	14014.3	0.0429337		0.01
20.33	0	0	0		-3.90799e-14
20.32	0	0	0		-0.01
20.31	6	121.86	0.000373878		-0.02
20.3	528	10718.4	0.0329013		-0.03
20.29	0	0	0		-0.04
20.28	0	0	0		-0.05
20.27	0	0	0		-0.06
20.26	0	0	0		-0.07
20.25	0	0	0		-0.08
20.24	0	0	0		-0.09
20.23	11	222.53	0.000685444		-0.1
20.22	0	0	0		-0.11
20.21	3	60.63	0.000186939		-0.12
20.2	164	3312.8	0.0102193		-0.13
20.19	17	343.23	0.00105932		-0.14
20.18	117	2361.06	0.00729063		-0.15
20.17	29	584.93	0.00180708		-0.16
20.16	38	766.08	0.0023679		-0.17
20.15	295	5944.25	0.0183824		-0.18
20.14	19	382.66	0.00118395		-0.19
20.13	14	281.82	0.000872383		-0.2
20.12	2	40.24	0.000124626		-0.21
20.11	27	542.97	0.00168245		-0.22
20.1	295	5929.5	0.0183824		-0.23
20.09	110	2209.9	0.00685444		-0.24
20.08	140	2811.2	0.00872383		-0.25
20.07	43	863.01	0.00267946		-0.26
20.06	60	1203.6	0.00373878		-0.27
20.05	58	1162.9	0.00361416		-0.28
20.04	86	1723.44	0.00535892		-0.29
20.03	59	1181.77	0.00367647		-0.3
20.02	172	3443.44	0.0107178		-0.31
20.01	57	1140.57	0.00355184		-0.32
20	304	6080	0.0189432		-0.33
19.99	16	319.84	0.000997009		-0.34
19.98	71	1418.58	0.00442423		-0.35
19.97	0	0	0		-0.36
19.96	0	0	0		-0.37
19.95	116	2314.2	0.00722832		-0.38
19.94	0	0	0		-0.39
19.93	0	0	0		-0.4
19.92	46	916.32	0.0028664		-0.41
19.91	0	0	0		-0.42
19.9	77	1532.3	0.00479811		-0.43
19.89	1	19.89	6.23131e-05		-0.44
19.88	132	2624.16	0.00822532		-0.45
19.87	148	2940.76	0.00922233		-0.46
19.86	59	1171.74	0.00367647		-0.47
19.85	208	4128.8	0.0129611		-0.48
19.84	170	3372.8	0.0105932		-0.49
19.83	99	1963.17	0.00616899		-0.5
19.82	86	1704.52	0.00535892		-0.51
19.81	45	891.45	0.00280409		-0.52
19.8	129	2554.2	0.00803838		-0.53
19.79	0	0	0		-0.54
19.78	20	395.6	0.00124626		-0.55
19.77	12	237.24	0.000747757		-0.56
19.76	0	0	0		-0.57
19.75	120	2370	0.00747757		-0.58
19.74	0	0	0		-0.59
19.73	8	157.84	0.000498504		-0.6
19.72	62	1222.64	0.00386341		-0.61
19.71	29	571.59	0.00180708		-0.62
19.7	268	5279.6	0.0166999		-0.63
19.69	20	393.8	0.00124626		-0.64
	16048	20.3336
