# Supplementary material for: Interaction Wave Functions and Interaction-Based Coherence and Entanglement in Complex Adaptive Systems
Source: Research Square preprint supplement (doi:10.21203/rs.3.rs-6846233/v1), 2025-06-16
Supplement: Supplementary file 409 [file 30613.xls]

## Sheet: Sheet1
20.95	344	7206.8	0.0372577		0.58
20.94	0	0	0		0.57
20.93	0	0	0		0.56
20.92	0	0	0		0.55
20.91	0	0	0		0.54
20.9	0	0	0		0.53
20.89	0	0	0		0.52
20.88	0	0	0		0.51
20.87	0	0	0		0.5
20.86	0	0	0		0.49
20.85	0	0	0		0.48
20.84	0	0	0		0.47
20.83	0	0	0		0.46
20.82	0	0	0		0.45
20.81	0	0	0		0.44
20.8	12	249.6	0.00129969		0.43
20.79	8	166.32	0.000866457		0.42
20.78	0	0	0		0.41
20.77	0	0	0		0.4
20.76	0	0	0		0.39
20.75	0	0	0		0.38
20.74	0	0	0		0.37
20.73	0	0	0		0.36
20.72	0	0	0		0.35
20.71	0	0	0		0.34
20.7	0	0	0		0.33
20.69	16	331.04	0.00173291		0.32
20.68	238	4921.84	0.0257771		0.31
20.67	0	0	0		0.3
20.66	0	0	0		0.29
20.65	92	1899.8	0.00996426		0.28
20.64	0	0	0		0.27
20.63	0	0	0		0.26
20.62	2	41.24	0.000216614		0.25
20.61	0	0	0		0.24
20.6	64	1318.4	0.00693166		0.23
20.59	0	0	0		0.22
20.58	0	0	0		0.21
20.57	0	0	0		0.2
20.56	13	267.28	0.00140799		0.19
20.55	19	390.45	0.00205784		0.18
20.54	0	0	0		0.17
20.53	10	205.3	0.00108307		0.16
20.52	523	10732	0.0566446		0.15
20.51	206	4225.06	0.0223113		0.14
20.5	172	3526	0.0186288		0.13
20.49	22	450.78	0.00238276		0.12
20.48	92	1884.16	0.00996426		0.11
20.47	56	1146.32	0.0060652		0.1
20.46	80	1636.8	0.00866457		0.09
20.45	297	6073.65	0.0321672		0.08
20.44	133	2718.52	0.0144049		0.07
20.43	142	2901.06	0.0153796		0.06
20.42	131	2675.02	0.0141882		0.05
20.41	3	61.23	0.000324921		0.04
20.4	1942	39616.8	0.210333		0.03
20.39	122	2487.58	0.0132135		0.02
20.38	120	2445.6	0.0129969		0.01
20.37	220	4481.4	0.0238276		-9.23706e-14
20.36	164	3339.04	0.0177624		-0.01
20.35	106	2157.1	0.0114806		-0.02
20.34	26	528.84	0.00281599		-0.03
20.33	140	2846.2	0.015163		-0.04
20.32	34	690.88	0.00368244		-0.05
20.31	104	2112.24	0.0112639		-0.06
20.3	215	4364.5	0.023286		-0.07
20.29	11	223.19	0.00119138		-0.08
20.28	122	2474.16	0.0132135		-0.09
20.27	203	4114.81	0.0219864		-0.1
20.26	101	2046.26	0.010939		-0.11
20.25	410	8302.5	0.0444059		-0.12
20.24	367	7428.08	0.0397487		-0.13
20.23	3	60.69	0.000324921		-0.14
20.22	101	2042.22	0.010939		-0.15
20.21	204	4122.84	0.0220947		-0.16
20.2	358	7231.6	0.038774		-0.17
20.19	240	4845.6	0.0259937		-0.18
20.18	336	6780.48	0.0363912		-0.19
20.17	256	5163.52	0.0277266		-0.2
20.16	146	2943.36	0.0158128		-0.21
20.15	164	3304.6	0.0177624		-0.22
20.14	41	825.74	0.00444059		-0.23
20.13	48	966.24	0.00519874		-0.24
20.12	0	0	0		-0.25
20.11	0	0	0		-0.26
20.1	0	0	0		-0.27
20.09	0	0	0		-0.28
20.08	0	0	0		-0.29
20.07	0	0	0		-0.3
20.06	0	0	0		-0.31
20.05	0	0	0		-0.32
20.04	0	0	0		-0.33
20.03	0	0	0		-0.34
20.02	0	0	0		-0.35
20.01	0	0	0		-0.36
20	0	0	0		-0.37
19.99	0	0	0		-0.38
19.98	0	0	0		-0.39
19.97	0	0	0		-0.4
19.96	0	0	0		-0.41
19.95	0	0	0		-0.42
19.94	254	5064.76	0.02751		-0.43
	9233	20.366
