# Supplementary material for: Interaction Wave Functions and Interaction-Based Coherence and Entanglement in Complex Adaptive Systems
Source: Research Square preprint supplement (doi:10.21203/rs.3.rs-6846233/v1), 2025-06-16
Supplement: Supplementary file 410 [file 30616-20.xls]

## Sheet: Sheet1
0.51				3		3	1.53	4.91489e-05
0.5				0		0	0	0
0.49				15		15	7.35	0.000245745
0.48				0		0	0	0
0.47				0		0	0	0
0.46				0		0	0	0
0.45				0		0	0	0
0.44				9		9	3.96	0.000147447
0.43				28		28	12.04	0.000458723
0.42				0		0	0	0
0.41				42		42	17.22	0.000688085
0.4				0		0	0	0
0.39				381		381	148.59	0.00624191
0.38				8		8	3.04	0.000131064
0.37				50		50	18.5	0.000819148
0.36				102		102	36.72	0.00167106
0.35				35		35	12.25	0.000573404
0.34				159		159	54.06	0.00260489
0.33				135		135	44.55	0.0022117
0.32				37		37	11.84	0.00060617
0.31				21		21	6.51	0.000344042
0.3				147		147	44.1	0.0024083
0.29				249		249	72.21	0.00407936
0.28				39		39	10.92	0.000638936
0.27				33		33	8.91	0.000540638
0.26				167		167	43.42	0.00273596
0.25				116		116	29	0.00190042
0.24				543		543	130.32	0.00889595
0.23				148		148	34.04	0.00242468
0.22				340		340	74.8	0.00557021
0.21				248		248	52.08	0.00406298
0.2	370		5	100	5	480	96	0.00786382
0.19	342		229	283	0	854	162.26	0.0139911
0.18	153		63	111	12	339	61.02	0.00555383
0.17	2847		111	99	50	3107	528.19	0.0509019
0.16	0	8	12	231	12	263	42.08	0.00430872
0.15	356	15	262	5	118	756	113.4	0.0123855
0.14	562	63	109	0	145	879	123.06	0.0144006
0.13	768	117	73	53	9	1020	132.6	0.0167106
0.12	2056	422	0	21	5	2504	300.48	0.041023
0.11	339	43	277	0	0	659	72.49	0.0107964
0.1	605	1184	0	0	706	2495	249.5	0.0408755
0.09	847	408	902	0	85	2242	201.78	0.0367306
0.08	180	122	97	0	243	642	51.36	0.0105179
0.07	706	1778	57	7	22	2570	179.9	0.0421042
0.06	41	265	0	5	142	453	27.18	0.00742148
0.05	416	356	40	0	625	1437	71.85	0.0235423
0.04	436	615	140	60	114	1365	54.6	0.0223628
0.03	524	499	34	60	118	1235	37.05	0.020233
0.02	3674	391	127	249	227	4668	93.36	0.0764757
0.01	346	43	80	166	380	1015	10.15	0.0166287
-3.08781e-16	146	302	108	192	555	1303	-4.02341e-13	0.021347
-0.01	140	463	1682	307	121	2713	-27.13	0.044447
-0.02	177	187	57	0	10	431	-8.62	0.00706106
-0.03	937	423	287	83	0	1730	-51.9	0.0283425
-0.04	272	108	246	0	73	699	-27.96	0.0114517
-0.05	238	17	365	123	288	1031	-51.55	0.0168908
-0.06	1054	7	1152	246	0	2459	-147.54	0.0402857
-0.07	449	27	153	0	2	631	-44.17	0.0103377
-0.08	2458	424	455	33	122	3492	-279.36	0.0572093
-0.09	28	6	789	50	17	890	-80.1	0.0145808
-0.1	90	66	316	281	712	1465	-146.5	0.024001
-0.11	240	232	156	728	23	1379	-151.69	0.0225921
-0.12	50	524		25	322	921	-110.52	0.0150887
-0.13	213	1911		361	0	2485	-323.05	0.0407117
-0.14	29	0		194	0	223	-31.22	0.0036534
-0.15	34	187		48	101	370	-55.5	0.0060617
-0.16	79	117		497	87	780	-124.8	0.0127787
-0.17	5	74		497	25	601	-102.17	0.00984616
-0.18	44	0		471	50	565	-101.7	0.00925638
-0.19	7	0		138		145	-27.55	0.00237553
-0.2	34	0		361		395	-79	0.00647127
-0.21	0	0		630		630	-132.3	0.0103213
-0.22	0	0		4		4	-0.88	6.55319e-05
-0.23	140	0		88		228	-52.44	0.00373532
-0.24	22	0		36		58	-13.92	0.000950212
-0.25	11	10		45		66	-16.5	0.00108128
-0.26	16	0		29		45	-11.7	0.000737234
-0.27	64	0		10		74	-19.98	0.00121234
-0.28	650	23		123		796	-222.88	0.0130408
-0.29	0			128		128	-37.12	0.00209702
-0.3	53			40		93	-27.9	0.00152362
-0.31	41			621		662	-205.22	0.0108455
-0.32	44					44	-14.08	0.000720851
-0.33	9					9	-2.97	0.000147447
-0.34	0					0	0	0
-0.35	0					0	0	0
-0.36	0					0	0	0
-0.37	16					16	-5.92	0.000262127
-0.38	232					232	-88.16	0.00380085
-0.39	115					115	-44.85	0.00188404
-0.4	30					30	-12	0.000491489
-0.41	0					0	0	0
-0.42	0					0	0	0
-0.43	52					52	-22.36	0.000851914
-0.44	0					0	0	0
-0.45	0					0	0	0
-0.46	0					0	0	0
-0.47	0					0	0	0
-0.48	88					88	-42.24	0.0014417
-0.49	0					0	0	0
-0.5	19					19	-9.5	0.000311276
-0.51	0					0	0	0
-0.52	0					0	0	0
-0.53	27					27	-14.31	0.00044234
-0.54	0					0	0	0
-0.55	248					248	-136.4	0.00406298
-0.56	53					53	-29.68	0.000868297
-0.57	5					5	-2.85	8.19148e-05
-0.58	358					358	-207.64	0.0058651
-0.59	213					213	-125.67	0.00348957
						61039	0.000241976
