# Supplementary material for: Interaction Wave Functions and Interaction-Based Coherence and Entanglement in Complex Adaptive Systems
Source: Research Square preprint supplement (doi:10.21203/rs.3.rs-6846233/v1), 2025-06-16
Supplement: Supplementary file 411 [file 30616.xls]

## Sheet: Sheet1
21.08	370	7799.6	0.0149206		0.2
21.07	342	7205.94	0.0137914		0.19
21.06	153	3222.18	0.00616985		0.18
21.05	2847	59929.3	0.114808		0.17
21.04	0	0	0		0.16
21.03	356	7486.68	0.014356		0.15
21.02	562	11813.2	0.0226631		0.14
21.01	768	16135.7	0.0309702		0.13
21	2056	43176	0.0829099		0.12
20.99	339	7115.61	0.0136705		0.11
20.98	605	12692.9	0.0243971		0.1
20.97	847	17761.6	0.034156		0.09
20.96	180	3772.8	0.00725865		0.08
20.95	706	14790.7	0.02847		0.07
20.94	41	858.54	0.00165336		0.06
20.93	416	8706.88	0.0167755		0.05
20.92	436	9121.12	0.0175821		0.04
20.91	524	10956.8	0.0211307		0.03
20.9	3674	76786.6	0.148157		0.02
20.89	346	7227.94	0.0139527		0.01
20.88	146	3048.48	0.00588757		-3.19744e-14
20.87	140	2921.8	0.00564562		-0.01
20.86	177	3692.22	0.00713767		-0.02
20.85	937	19536.4	0.0377853		-0.03
20.84	272	5668.48	0.0109686		-0.04
20.83	238	4957.54	0.00959755		-0.05
20.82	1054	21944.3	0.0425034		-0.06
20.81	449	9343.69	0.0181063		-0.07
20.8	2458	51126.4	0.0991209		-0.08
20.79	28	582.12	0.00112912		-0.09
20.78	90	1870.2	0.00362932		-0.1
20.77	240	4984.8	0.0096782		-0.11
20.76	50	1038	0.00201629		-0.12
20.75	213	4419.75	0.0085894		-0.13
20.74	29	601.46	0.00116945		-0.14
20.73	34	704.82	0.00137108		-0.15
20.72	79	1636.88	0.00318574		-0.16
20.71	5	103.55	0.000201629		-0.17
20.7	44	910.8	0.00177434		-0.18
20.69	7	144.83	0.000282281		-0.19
20.68	34	703.12	0.00137108		-0.2
20.67	0	0	0		-0.21
20.66	0	0	0		-0.22
20.65	140	2891	0.00564562		-0.23
20.64	22	454.08	0.000887168		-0.24
20.63	11	226.93	0.000443584		-0.25
20.62	16	329.92	0.000645213		-0.26
20.61	64	1319.04	0.00258085		-0.27
20.6	650	13390	0.0262118		-0.28
20.59	0	0	0		-0.29
20.58	53	1090.74	0.00213727		-0.3
20.57	41	843.37	0.00165336		-0.31
20.56	44	904.64	0.00177434		-0.32
20.55	9	184.95	0.000362932		-0.33
20.54	0	0	0		-0.34
20.53	0	0	0		-0.35
20.52	0	0	0		-0.36
20.51	16	328.16	0.000645213		-0.37
20.5	232	4756	0.00935559		-0.38
20.49	115	2356.35	0.00463747		-0.39
20.48	30	614.4	0.00120977		-0.4
20.47	0	0	0		-0.41
20.46	0	0	0		-0.42
20.45	52	1063.4	0.00209694		-0.43
20.44	0	0	0		-0.44
20.43	0	0	0		-0.45
20.42	0	0	0		-0.46
20.41	0	0	0		-0.47
20.4	88	1795.2	0.00354867		-0.48
20.39	0	0	0		-0.49
20.38	19	387.22	0.000766191		-0.5
20.37	0	0	0		-0.51
20.36	0	0	0		-0.52
20.35	27	549.45	0.0010888		-0.53
20.34	0	0	0		-0.54
20.33	248	5041.84	0.0100008		-0.55
20.32	53	1076.96	0.00213727		-0.56
20.31	5	101.55	0.000201629		-0.57
20.3	358	7267.4	0.0144366		-0.58
20.29	213	4321.77	0.0085894		-0.59
	24798	20.8805
