# Supplementary material for: Interaction Wave Functions and Interaction-Based Coherence and Entanglement in Complex Adaptive Systems
Source: Research Square preprint supplement (doi:10.21203/rs.3.rs-6846233/v1), 2025-06-16
Supplement: Supplementary file 412 [file 30617.xls]

## Sheet: Sheet1
21.09	8	168.72	0.000699484		0.16
21.08	15	316.2	0.00131153		0.15
21.07	63	1327.41	0.00550844		0.14
21.06	117	2464.02	0.01023		0.13
21.05	422	8883.1	0.0368978		0.12
21.04	43	904.72	0.00375973		0.11
21.03	1184	24899.5	0.103524		0.1
21.02	408	8576.16	0.0356737		0.09
21.01	122	2563.22	0.0106671		0.08
21	1778	37338	0.15546		0.07
20.99	265	5562.35	0.0231704		0.06
20.98	356	7468.88	0.031127		0.05
20.97	615	12896.5	0.0537728		0.04
20.96	499	10459	0.0436303		0.03
20.95	391	8191.45	0.0341873		0.02
20.94	43	900.42	0.00375973		0.01
20.93	302	6320.86	0.0264055		0
20.92	463	9685.96	0.0404826		-0.01
20.91	187	3910.17	0.0163504		-0.02
20.9	423	8840.7	0.0369852		-0.03
20.89	108	2256.12	0.00944304		-0.04
20.88	17	354.96	0.0014864		-0.05
20.87	7	146.09	0.000612049		-0.06
20.86	27	563.22	0.00236076		-0.07
20.85	424	8840.4	0.0370727		-0.08
20.84	6	125.04	0.000524613		-0.09
20.83	66	1374.78	0.00577074		-0.1
20.82	232	4830.24	0.020285		-0.11
20.81	524	10904.4	0.0458162		-0.12
20.8	1911	39748.8	0.167089		-0.13
20.79	0	0	0		-0.14
20.78	187	3885.86	0.0163504		-0.15
20.77	117	2430.09	0.01023		-0.16
20.76	74	1536.24	0.00647023		-0.17
20.75	0	0	0		-0.18
20.74	0	0	0		-0.19
20.73	0	0	0		-0.2
20.72	0	0	0		-0.21
20.71	0	0	0		-0.22
20.7	0	0	0		-0.23
20.69	0	0	0		-0.24
20.68	10	206.8	0.000874355		-0.25
20.67	0	0	0		-0.26
20.66	0	0	0		-0.27
20.65	23	474.95	0.00201102		-0.28
	11437	20.9282
