# Supplementary material for: Interaction Wave Functions and Interaction-Based Coherence and Entanglement in Complex Adaptive Systems
Source: Research Square preprint supplement (doi:10.21203/rs.3.rs-6846233/v1), 2025-06-16
Supplement: Supplementary file 413 [file 30618.xls]

## Sheet: Sheet1
20.91	5	104.55	0.000596374		0.2
20.9	229	4786.1	0.0273139		0.19
20.89	63	1316.07	0.00751431		0.18
20.88	111	2317.68	0.0132395		0.17
20.87	12	250.44	0.0014313		0.16
20.86	262	5465.32	0.03125		0.15
20.85	109	2272.65	0.013001		0.14
20.84	73	1521.32	0.00870706		0.13
20.83	0	0	0		0.12
20.82	277	5767.14	0.0330391		0.11
20.81	0	0	0		0.1
20.8	902	18761.6	0.107586		0.09
20.79	97	2016.63	0.0115697		0.08
20.78	57	1184.46	0.00679866		0.07
20.77	0	0	0		0.06
20.76	40	830.4	0.00477099		0.05
20.75	140	2905	0.0166985		0.04
20.74	34	705.16	0.00405534		0.03
20.73	127	2632.71	0.0151479		0.02
20.72	80	1657.6	0.00954198		0.01
20.71	108	2236.68	0.0128817		-3.19744e-14
20.7	1682	34817.4	0.20062		-0.01
20.69	57	1179.33	0.00679866		-0.02
20.68	287	5935.16	0.0342319		-0.03
20.67	246	5084.82	0.0293416		-0.04
20.66	365	7540.9	0.0435353		-0.05
20.65	1152	23788.8	0.137405		-0.06
20.64	153	3157.92	0.018249		-0.07
20.63	455	9386.65	0.05427		-0.08
20.62	789	16269.2	0.0941078		-0.09
20.61	316	6512.76	0.0376908		-0.1
20.6	156	3213.6	0.0186069		-0.11
	8384	20.7083
