# Supplementary material for: Interaction Wave Functions and Interaction-Based Coherence and Entanglement in Complex Adaptive Systems
Source: Research Square preprint supplement (doi:10.21203/rs.3.rs-6846233/v1), 2025-06-16
Supplement: Supplementary file 414 [file 30619.xls]

## Sheet: Sheet1
20.62	3	61.86	0.000275381		0.51
20.61	0	0	0		0.5
20.6	15	309	0.0013769		0.49
20.59	0	0	0		0.48
20.58	0	0	0		0.47
20.57	0	0	0		0.46
20.56	0	0	0		0.45
20.55	9	184.95	0.000826143		0.44
20.54	28	575.12	0.00257022		0.43
20.53	0	0	0		0.42
20.52	42	861.84	0.00385533		0.41
20.51	0	0	0		0.4
20.5	381	7810.5	0.0349734		0.39
20.49	8	163.92	0.000734349		0.38
20.48	50	1024	0.00458968		0.37
20.47	102	2087.94	0.00936295		0.36
20.46	35	716.1	0.00321278		0.35
20.45	159	3251.55	0.0145952		0.34
20.44	135	2759.4	0.0123921		0.33
20.43	37	755.91	0.00339636		0.32
20.42	21	428.82	0.00192767		0.31
20.41	147	3000.27	0.0134937		0.3
20.4	249	5079.6	0.0228566		0.29
20.39	39	795.21	0.00357995		0.28
20.38	33	672.54	0.00302919		0.27
20.37	167	3401.79	0.0153295		0.26
20.36	116	2361.76	0.0106481		0.25
20.35	543	11050	0.049844		0.24
20.34	148	3010.32	0.0135855		0.23
20.33	340	6912.2	0.0312098		0.22
20.32	248	5039.36	0.0227648		0.21
20.31	100	2031	0.00917936		0.2
20.3	283	5744.9	0.0259776		0.19
20.29	111	2252.19	0.0101891		0.18
20.28	99	2007.72	0.00908757		0.17
20.27	231	4682.37	0.0212043		0.16
20.26	5	101.3	0.000458968		0.15
20.25	0	0	0		0.14
20.24	53	1072.72	0.00486506		0.13
20.23	21	424.83	0.00192767		0.12
20.22	0	0	0		0.11
20.21	0	0	0		0.1
20.2	0	0	0		0.09
20.19	0	0	0		0.08
20.18	7	141.26	0.000642556		0.07
20.17	5	100.85	0.000458968		0.06
20.16	0	0	0		0.05
20.15	60	1209	0.00550762		0.04
20.14	60	1208.4	0.00550762		0.03
20.13	249	5012.37	0.0228566		0.02
20.12	166	3339.92	0.0152377		0.01
20.11	192	3861.12	0.0176244		-7.81597e-14
20.1	307	6170.7	0.0281806		-0.01
20.09	0	0	0		-0.02
20.08	83	1666.64	0.00761887		-0.03
20.07	0	0	0		-0.04
20.06	123	2467.38	0.0112906		-0.05
20.05	246	4932.3	0.0225812		-0.06
20.04	0	0	0		-0.07
20.03	33	660.99	0.00302919		-0.08
20.02	50	1001	0.00458968		-0.09
20.01	281	5622.81	0.025794		-0.1
20	728	14560	0.0668258		-0.11
19.99	25	499.75	0.00229484		-0.12
19.98	361	7212.78	0.0331375		-0.13
19.97	194	3874.18	0.017808		-0.14
19.96	48	958.08	0.0044061		-0.15
19.95	497	9915.15	0.0456214		-0.16
19.94	497	9910.18	0.0456214		-0.17
19.93	471	9387.03	0.0432348		-0.18
19.92	138	2748.96	0.0126675		-0.19
19.91	361	7187.51	0.0331375		-0.2
19.9	630	12537	0.05783		-0.21
19.89	4	79.56	0.000367175		-0.22
19.88	88	1749.44	0.00807784		-0.23
19.87	36	715.32	0.00330457		-0.24
19.86	45	893.7	0.00413071		-0.25
19.85	29	575.65	0.00266202		-0.26
19.84	10	198.4	0.000917936		-0.27
19.83	123	2439.09	0.0112906		-0.28
19.82	128	2536.96	0.0117496		-0.29
19.81	40	792.4	0.00367175		-0.3
19.8	621	12295.8	0.0570039		-0.31
	10894	20.1113
