# Supplementary material for: Interaction Wave Functions and Interaction-Based Coherence and Entanglement in Complex Adaptive Systems
Source: Research Square preprint supplement (doi:10.21203/rs.3.rs-6846233/v1), 2025-06-16
Supplement: Supplementary file 415 [file 30620.xls]

## Sheet: Sheet1
20	5	100	0.000904814		0.2
19.99	0	0	0		0.19
19.98	12	239.76	0.00217155		0.18
19.97	50	998.5	0.00904814		0.17
19.96	12	239.52	0.00217155		0.16
19.95	118	2354.1	0.0213536		0.15
19.94	145	2891.3	0.0262396		0.14
19.93	9	179.37	0.00162866		0.13
19.92	5	99.6	0.000904814		0.12
19.91	0	0	0		0.11
19.9	706	14049.4	0.12776		0.1
19.89	85	1690.65	0.0153818		0.09
19.88	243	4830.84	0.0439739		0.08
19.87	22	437.14	0.00398118		0.07
19.86	142	2820.12	0.0256967		0.06
19.85	625	12406.2	0.113102		0.05
19.84	114	2261.76	0.0206298		0.04
19.83	118	2339.94	0.0213536		0.03
19.82	227	4499.14	0.0410785		0.02
19.81	380	7527.8	0.0687658		0.01
19.8	555	10989	0.100434		-3.19744e-14
19.79	121	2394.59	0.0218965		-0.01
19.78	10	197.8	0.00180963		-0.02
19.77	0	0	0		-0.03
19.76	73	1442.48	0.0132103		-0.04
19.75	288	5688	0.0521173		-0.05
19.74	0	0	0		-0.06
19.73	2	39.46	0.000361925		-0.07
19.72	122	2405.84	0.0220775		-0.08
19.71	17	335.07	0.00307637		-0.09
19.7	712	14026.4	0.128845		-0.1
19.69	23	452.87	0.00416214		-0.11
19.68	322	6336.96	0.05827		-0.12
19.67	0	0	0		-0.13
19.66	0	0	0		-0.14
19.65	101	1984.65	0.0182772		-0.15
19.64	87	1708.68	0.0157438		-0.16
19.63	25	490.75	0.00452407		-0.17
19.62	50	981	0.00904814		-0.18
	5526	19.8043
