# Supplementary material for: Interaction Wave Functions and Interaction-Based Coherence and Entanglement in Complex Adaptive Systems
Source: Research Square preprint supplement (doi:10.21203/rs.3.rs-6846233/v1), 2025-06-16
Supplement: Supplementary file 416 [file 30623-27.xls]

## Sheet: Sheet1
0.6				62		62		0.000539736
0.59				394		394		0.00342993
0.58				2761		2761		0.0240357
0.57				3222		3222		0.0280489
0.56				181		181		0.00157568
0.55				901		901		0.00784358
0.54				23		23		0.000200225
0.53				383		383		0.00333417
0.52				143		143		0.00124487
0.51				148		148		0.0012884
0.5				5975		5975		0.0520149
0.49				1167		1167		0.0101592
0.48				1420		1420		0.0123617
0.47				1057		1057		0.00920163
0.46				986	118	1104		0.00961078
0.45				1633	0	1633		0.0142159
0.44				823	0	823		0.00716456
0.43				72	10	82		0.000713844
0.42				89	0	89		0.000774782
0.41				234	220	454		0.00395226
0.4				1622	32	1654		0.0143988
0.39				230	0	230		0.00200225
0.38				389	0	389		0.00338641
0.37				426	72	498		0.0043353
0.36				372	410	782		0.00680764
0.35				504	198	702		0.0061112
0.34				0	149	149		0.00129711
0.33				103	0	103		0.000896658
0.32				251	61	312		0.00271609
0.31				82	328	410		0.00356922
0.3				768	0	768		0.00668576
0.29				866	56	922		0.00802639
0.28				675	172	847		0.00737349
0.27				26	46	72		0.00062679
0.26			12	146	473	631		0.00549312
0.25			0	1011	1	1012		0.00880988
0.24			186	5	28	219		0.00190649
0.23			42	662	25	729		0.00634625
0.22			21	289	5	315		0.00274221
0.21		7	460	177	354	998		0.00868801
0.2		58	512	2574	371	3515		0.0305995
0.19	2	0	260	602	91	955		0.00831367
0.18	0	0	107	112	392	611		0.00531901
0.17	75	0	441	0	85	601		0.00523196
0.16	265	0	413	0	1966	2644		0.0230171
0.15	82	5	25	91	516	719		0.0062592
0.14	0	0	83	0	867	950		0.00827015
0.13	7	0	0	0	73	80		0.000696433
0.12	0	0	0	0	186	186		0.00161921
0.11	932	203	115	0	708	1958		0.0170452
0.1	6	0	181	710	64	961		0.00836591
0.09	17	18	88	0	734	857		0.00746054
0.08	0	8	32	37	110	187		0.00162791
0.07	35	21	12	29	97	194		0.00168885
0.06	57	32	38	912	2473	3512		0.0305734
0.05	0	0	0	0	872	872		0.00759112
0.04	28	11	34	0	555	628		0.005467
0.03	31	977	168	0	424	1600		0.0139287
0.02	23	332	89	0	429	873		0.00759983
0.01	900	618	2103	57	497	4175		0.0363451
-4.19803e-16	291	424	350	435	145	1645		0.0143204
-0.01	200	221	446	871	325	2063		0.0179593
-0.02	36	0	205	225	145	611		0.00531901
-0.03	227	12	210	0	447	896		0.00780005
-0.04	160	197	523	0	1755	2635		0.0229388
-0.05	99	17	280	43	110	549		0.00477927
-0.06	0	18	385	0	453	856		0.00745184
-0.07	75	88	44	0	237	444		0.00386521
-0.08	71	362	2	0	360	795		0.00692081
-0.09	611	374	803	0	597	2385		0.0207624
-0.1	49		260	704	210	1223		0.0106467
-0.11	104		433	0	1553	2090		0.0181943
-0.12	20		450	0	166	636		0.00553665
-0.13	55		500	0	257	812		0.0070688
-0.14	91		793	223	1368	2475		0.0215459
-0.15	0		100	35	530	665		0.0057891
-0.16	119		133	66	667	985		0.00857484
-0.17	7		88	310	267	672		0.00585004
-0.18	75		100	57	538	770		0.00670317
-0.19	156		35	61	292	544		0.00473575
-0.2			0	675	486	1161		0.010107
-0.21			0	216	26	242		0.00210671
-0.22			0	8	14	22		0.000191519
-0.23			0	34	393	427		0.00371721
-0.24			0	222	1310	1532		0.0133367
-0.25			0	142	173	315		0.00274221
-0.26			0	41	730	771		0.00671188
-0.27			0	225	34	259		0.0022547
-0.28			0	0	60	60		0.000522325
-0.29			0	75	588	663		0.00577169
-0.3			0	369		369		0.0032123
-0.31			0	178		178		0.00154956
-0.32			0	1061		1061		0.00923645
-0.33			0	222		222		0.0019326
-0.34			0	632		632		0.00550182
-0.35			0	1066		1066		0.00927997
-0.36			0	436		436		0.00379556
-0.37			0	374		374		0.00325583
-0.38			0	258		258		0.002246
-0.39			0	16		16		0.000139287
-0.4			0	267		267		0.00232435
-0.41			0	425		425		0.0036998
-0.42			0	908		908		0.00790452
-0.43			0	10		10		8.70542e-05
-0.44			5	26		31		0.000269868
-0.45				936		936		0.00814827
-0.46				65		65		0.000565852
-0.47				1325		1325		0.0115347
-0.48				663		663		0.00577169
-0.49				871		871		0.00758242
-0.5				2754		2754		0.0239747
-0.51				533		533		0.00463999
-0.52				324		324		0.00282056
-0.53				562		562		0.00489244
-0.54				72		72		0.00062679
-0.55				360		360		0.00313395
-0.56				98		98		0.000853131
-0.57				1		1		8.70542e-06
-0.58				255		255		0.00221988
-0.59				87		87		0.000757371
-0.6				1147		1147		0.00998511
-0.61				87		87		0.000757371
-0.62				526		526		0.00457905
-0.63				758		758		0.00659871
-0.64				172		172		0.00149733
-0.65				798		798		0.00694692
-0.66				263		263		0.00228952
-0.67				395		395		0.00343864
-0.68				312		312		0.00271609
-0.69				106		106		0.000922774
-0.7				755		755		0.00657259
-0.71				282		282		0.00245493
-0.72				500		500		0.00435271
-0.73				403		403		0.00350828
-0.74				322		322		0.00280314
-0.75				1408		1408		0.0122572
-0.76				146		146		0.00127099
-0.77				57		57		0.000496209
-0.78				357		357		0.00310783
-0.79				50		50		0.000435271
-0.8				849		849		0.0073909
-0.81				0		0		0
-0.82				190		190		0.00165403
-0.83				11		11		9.57596e-05
-0.84				48		48		0.00041786
-0.85				0		0		0
-0.86				0		0		0
-0.87				0		0		0
-0.88				0		0		0
-0.89				17		17		0.000147992
-0.9				304		304		0.00264645
-0.91				210		210		0.00182814
-0.92				52		52		0.000452682
-0.93				0		0		0
-0.94				0		0		0
-0.95				0		0		0
-0.96				0		0		0
-0.97				0		0		0
-0.98				1		1		8.70542e-06
-0.99				18		18		0.000156698
-1				10		10		8.70542e-05
-1.01				0		0		0
-1.02				10		10		8.70542e-05
-1.03				0		0		0
-1.04				0		0		0
-1.05				0		0		0
-1.06				0		0		0
-1.07				0		0		0
-1.08				0		0		0
-1.09				0		0		0
-1.1				0		0		0
-1.11				0		0		0
-1.12				10		10		8.70542e-05
-1.13				0		0		0
-1.14				0		0		0
-1.15				7		7		6.09379e-05
-1.16				0		0		0
-1.17				42		42		0.000365628
-1.18				44		44		0.000383038
						114871
