# Supplementary material for: Interaction Wave Functions and Interaction-Based Coherence and Entanglement in Complex Adaptive Systems
Source: Research Square preprint supplement (doi:10.21203/rs.3.rs-6846233/v1), 2025-06-16
Supplement: Supplementary file 417 [file 30623.xls]

## Sheet: Sheet1
19.88	2	39.76	0.000407664		0.19
19.87	0	0	0		0.18
19.86	75	1489.5	0.0152874		0.17
19.85	265	5260.25	0.0540155		0.16
19.84	82	1626.88	0.0167142		0.15
19.83	0	0	0		0.14
19.82	7	138.74	0.00142682		0.13
19.81	0	0	0		0.12
19.8	932	18453.6	0.189971		0.11
19.79	6	118.74	0.00122299		0.1
19.78	17	336.26	0.00346514		0.09
19.77	0	0	0		0.08
19.76	35	691.6	0.00713412		0.07
19.75	57	1125.75	0.0116184		0.06
19.74	0	0	0		0.05
19.73	28	552.44	0.0057073		0.04
19.72	31	611.32	0.00631879		0.03
19.71	23	453.33	0.00468814		0.02
19.7	900	17730	0.183449		0.01
19.69	291	5729.79	0.0593151		-3.19744e-14
19.68	200	3936	0.0407664		-0.01
19.67	36	708.12	0.00733795		-0.02
19.66	227	4462.82	0.0462699		-0.03
19.65	160	3144	0.0326131		-0.04
19.64	99	1944.36	0.0201794		-0.05
19.63	0	0	0		-0.06
19.62	75	1471.5	0.0152874		-0.07
19.61	71	1392.31	0.0144721		-0.08
19.6	611	11975.6	0.124541		-0.09
19.59	49	959.91	0.00998777		-0.1
19.58	104	2036.32	0.0211985		-0.11
19.57	20	391.4	0.00407664		-0.12
19.56	55	1075.8	0.0112108		-0.13
19.55	91	1779.05	0.0185487		-0.14
19.54	0	0	0		-0.15
19.53	119	2324.07	0.024256		-0.16
19.52	7	136.64	0.00142682		-0.17
19.51	75	1463.25	0.0152874		-0.18
19.5	156	3042	0.0317978		-0.19
	4906	19.6904
