# Supplementary material for: Interaction Wave Functions and Interaction-Based Coherence and Entanglement in Complex Adaptive Systems
Source: Research Square preprint supplement (doi:10.21203/rs.3.rs-6846233/v1), 2025-06-16
Supplement: Supplementary file 418 [file 30624.xls]

## Sheet: Sheet1
19.8	7	138.6	0.00174869		0.21
19.79	58	1147.82	0.0144891		0.2
19.78	0	0	0		0.19
19.77	0	0	0		0.18
19.76	0	0	0		0.17
19.75	0	0	0		0.16
19.74	5	98.7	0.00124906		0.15
19.73	0	0	0		0.14
19.72	0	0	0		0.13
19.71	0	0	0		0.12
19.7	203	3999.1	0.050712		0.11
19.69	0	0	0		0.1
19.68	18	354.24	0.00449663		0.09
19.67	8	157.36	0.0019985		0.08
19.66	21	412.86	0.00524607		0.07
19.65	32	628.8	0.007994		0.06
19.64	0	0	0		0.05
19.63	11	215.93	0.00274794		0.04
19.62	977	19168.7	0.244067		0.03
19.61	332	6510.52	0.0829378		0.02
19.6	618	12112.8	0.154384		0.01
19.59	424	8306.16	0.105921		-3.19744e-14
19.58	221	4327.18	0.0552086		-0.01
19.57	0	0	0		-0.02
19.56	12	234.72	0.00299775		-0.03
19.55	197	3851.35	0.0492131		-0.04
19.54	17	332.18	0.00424681		-0.05
19.53	18	351.54	0.00449663		-0.06
19.52	88	1717.76	0.0219835		-0.07
19.51	362	7062.62	0.0904322		-0.08
19.5	374	7293	0.0934299		-0.09
	4003	19.5908
