# Supplementary material for: Interaction Wave Functions and Interaction-Based Coherence and Entanglement in Complex Adaptive Systems
Source: Research Square preprint supplement (doi:10.21203/rs.3.rs-6846233/v1), 2025-06-16
Supplement: Supplementary file 419 [file 30625.xls]

## Sheet: Sheet1
20.25	12	243	0.00103743		0.26
20.24	0	0	0		0.25
20.23	186	3762.78	0.0160802		0.24
20.22	42	849.24	0.00363102		0.23
20.21	21	424.41	0.00181551		0.22
20.2	460	9292	0.0397683		0.21
20.19	512	10337.3	0.0442639		0.2
20.18	260	5246.8	0.0224777		0.19
20.17	107	2158.19	0.00925045		0.18
20.16	441	8890.56	0.0381257		0.17
20.15	413	8321.95	0.035705		0.16
20.14	25	503.5	0.00216132		0.15
20.13	83	1670.79	0.00717559		0.14
20.12	0	0	0		0.13
20.11	0	0	0		0.12
20.1	115	2311.5	0.00994208		0.11
20.09	181	3636.29	0.015648		0.1
20.08	88	1767.04	0.00760785		0.09
20.07	32	642.24	0.00276649		0.08
20.06	12	240.72	0.00103743		0.07
20.05	38	761.9	0.00328521		0.06
20.04	0	0	0		0.05
20.03	34	681.02	0.0029394		0.04
20.02	168	3363.36	0.0145241		0.03
20.01	89	1780.89	0.0076943		0.02
20	2103	42060	0.18181		0.01
19.99	350	6996.5	0.0302585		-3.90799e-14
19.98	446	8911.08	0.038558		-0.01
19.97	205	4093.85	0.0177228		-0.02
19.96	210	4191.6	0.0181551		-0.03
19.95	523	10433.8	0.0452148		-0.04
19.94	280	5583.2	0.0242068		-0.05
19.93	385	7673.05	0.0332843		-0.06
19.92	44	876.48	0.00380392		-0.07
19.91	2	39.82	0.000172906		-0.08
19.9	803	15979.7	0.0694216		-0.09
19.89	260	5171.4	0.0224777		-0.1
19.88	433	8608.04	0.0374341		-0.11
19.87	450	8941.5	0.0389038		-0.12
19.86	500	9930	0.0432264		-0.13
19.85	793	15741	0.0685571		-0.14
19.84	100	1984	0.00864528		-0.15
19.83	133	2637.39	0.0114982		-0.16
19.82	88	1744.16	0.00760785		-0.17
19.81	100	1981	0.00864528		-0.18
19.8	35	693	0.00302585		-0.19
19.79	0	0	0		-0.2
19.78	0	0	0		-0.21
19.77	0	0	0		-0.22
19.76	0	0	0		-0.23
19.75	0	0	0		-0.24
19.74	0	0	0		-0.25
19.73	0	0	0		-0.26
19.72	0	0	0		-0.27
19.71	0	0	0		-0.28
19.7	0	0	0		-0.29
19.69	0	0	0		-0.3
19.68	0	0	0		-0.31
19.67	0	0	0		-0.32
19.66	0	0	0		-0.33
19.65	0	0	0		-0.34
19.64	0	0	0		-0.35
19.63	0	0	0		-0.36
19.62	0	0	0		-0.37
19.61	0	0	0		-0.38
19.6	0	0	0		-0.39
19.59	0	0	0		-0.4
19.58	0	0	0		-0.41
19.57	0	0	0		-0.42
19.56	0	0	0		-0.43
19.55	5	97.75	0.000432264		-0.44
	11567	19.9926
