# Supplementary material for: Interaction Wave Functions and Interaction-Based Coherence and Entanglement in Complex Adaptive Systems
Source: Research Square preprint supplement (doi:10.21203/rs.3.rs-6846233/v1), 2025-06-16
Supplement: Supplementary file 420 [file 30626.xls]

## Sheet: Sheet1
21.6	62	1339.2	0.000940948		0.6
21.59	394	8506.46	0.00597957		0.59
21.58	2761	59582.4	0.0419025		0.58
21.57	3222	69498.5	0.0488989		0.57
21.56	181	3902.36	0.00274696		0.56
21.55	901	19416.5	0.0136741		0.55
21.54	23	495.42	0.000349061		0.54
21.53	383	8245.99	0.00581263		0.53
21.52	143	3077.36	0.00217025		0.52
21.51	148	3183.48	0.00224613		0.51
21.5	5975	128462	0.0906801		0.5
21.49	1167	25078.8	0.0177111		0.49
21.48	1420	30501.6	0.0215507		0.48
21.47	1057	22693.8	0.0160416		0.47
21.46	986	21159.6	0.0149641		0.46
21.45	1633	35027.8	0.0247834		0.45
21.44	823	17645.1	0.0124903		0.44
21.43	72	1542.96	0.00109271		0.43
21.42	89	1906.38	0.00135072		0.42
21.41	234	5009.94	0.00355132		0.41
21.4	1622	34710.8	0.0246164		0.4
21.39	230	4919.7	0.00349061		0.39
21.38	389	8316.82	0.00590369		0.38
21.37	426	9103.62	0.00646522		0.37
21.36	372	7945.92	0.00564569		0.36
21.35	504	10760.4	0.007649		0.35
21.34	0	0	0		0.34
21.33	103	2196.99	0.00156319		0.33
21.32	251	5351.32	0.00380932		0.32
21.31	82	1747.42	0.00124448		0.31
21.3	768	16358.4	0.0116556		0.3
21.29	866	18437.1	0.0131429		0.29
21.28	675	14364	0.0102442		0.28
21.27	26	553.02	0.000394591		0.27
21.26	146	3103.96	0.00221578		0.26
21.25	1011	21483.7	0.0153435		0.25
21.24	5	106.2	7.58829e-05		0.24
21.23	662	14054.3	0.0100469		0.23
21.22	289	6132.58	0.00438603		0.22
21.21	177	3754.17	0.00268625		0.21
21.2	2574	54568.8	0.0390645		0.2
21.19	602	12756.4	0.0091363		0.19
21.18	112	2372.16	0.00169978		0.18
21.17	0	0	0		0.17
21.16	0	0	0		0.16
21.15	91	1924.65	0.00138107		0.15
21.14	0	0	0		0.14
21.13	0	0	0		0.13
21.12	0	0	0		0.12
21.11	0	0	0		0.11
21.1	710	14981	0.0107754		0.1
21.09	0	0	0		0.09
21.08	37	779.96	0.000561533		0.08
21.07	29	611.03	0.000440121		0.07
21.06	912	19206.7	0.013841		0.06
21.05	0	0	0		0.05
21.04	0	0	0		0.04
21.03	0	0	0		0.03
21.02	0	0	0		0.02
21.01	57	1197.57	0.000865065		0.01
21	435	9135	0.00660181		-9.23706e-14
20.99	871	18282.3	0.0132188		-0.01
20.98	225	4720.5	0.00341473		-0.02
20.97	0	0	0		-0.03
20.96	0	0	0		-0.04
20.95	43	900.85	0.000652593		-0.05
20.94	0	0	0		-0.06
20.93	0	0	0		-0.07
20.92	0	0	0		-0.08
20.91	0	0	0		-0.09
20.9	704	14713.6	0.0106843		-0.1
20.89	0	0	0		-0.11
20.88	0	0	0		-0.12
20.87	0	0	0		-0.13
20.86	223	4651.78	0.00338438		-0.14
20.85	35	729.75	0.00053118		-0.15
20.84	66	1375.44	0.00100165		-0.16
20.83	310	6457.3	0.00470474		-0.17
20.82	57	1186.74	0.000865065		-0.18
20.81	61	1269.41	0.000925771		-0.19
20.8	675	14040	0.0102442		-0.2
20.79	216	4490.64	0.00327814		-0.21
20.78	8	166.24	0.000121413		-0.22
20.77	34	706.18	0.000516004		-0.23
20.76	222	4608.72	0.0033692		-0.24
20.75	142	2946.5	0.00215507		-0.25
20.74	41	850.34	0.00062224		-0.26
20.73	225	4664.25	0.00341473		-0.27
20.72	0	0	0		-0.28
20.71	75	1553.25	0.00113824		-0.29
20.7	369	7638.3	0.00560016		-0.3
20.69	178	3682.82	0.00270143		-0.31
20.68	1061	21941.5	0.0161024		-0.32
20.67	222	4588.74	0.0033692		-0.33
20.66	632	13057.1	0.0095916		-0.34
20.65	1066	22012.9	0.0161782		-0.35
20.64	436	8999.04	0.00661699		-0.36
20.63	374	7715.62	0.00567604		-0.37
20.62	258	5319.96	0.00391556		-0.38
20.61	16	329.76	0.000242825		-0.39
20.6	267	5500.2	0.00405215		-0.4
20.59	425	8750.75	0.00645005		-0.41
20.58	908	18686.6	0.0137803		-0.42
20.57	10	205.7	0.000151766		-0.43
20.56	26	534.56	0.000394591		-0.44
20.55	936	19234.8	0.0142053		-0.45
20.54	65	1335.1	0.000986478		-0.46
20.53	1325	27202.2	0.020109		-0.47
20.52	663	13604.8	0.0100621		-0.48
20.51	871	17864.2	0.0132188		-0.49
20.5	2754	56457	0.0417963		-0.5
20.49	533	10921.2	0.00808912		-0.51
20.48	324	6635.52	0.00491721		-0.52
20.47	562	11504.1	0.00852924		-0.53
20.46	72	1473.12	0.00109271		-0.54
20.45	360	7362	0.00546357		-0.55
20.44	98	2003.12	0.0014873		-0.56
20.43	1	20.43	1.51766e-05		-0.57
20.42	255	5207.1	0.00387003		-0.58
20.41	87	1775.67	0.00132036		-0.59
20.4	1147	23398.8	0.0174075		-0.6
20.39	87	1773.93	0.00132036		-0.61
20.38	526	10719.9	0.00798288		-0.62
20.37	758	15440.5	0.0115038		-0.63
20.36	172	3501.92	0.00261037		-0.64
20.35	798	16239.3	0.0121109		-0.65
20.34	263	5349.42	0.00399144		-0.66
20.33	395	8030.35	0.00599475		-0.67
20.32	312	6339.84	0.00473509		-0.68
20.31	106	2152.86	0.00160872		-0.69
20.3	755	15326.5	0.0114583		-0.7
20.29	282	5721.78	0.0042798		-0.71
20.28	500	10140	0.00758829		-0.72
20.27	403	8168.81	0.00611616		-0.73
20.26	322	6523.72	0.00488686		-0.74
20.25	1408	28512	0.0213686		-0.75
20.24	146	2955.04	0.00221578		-0.76
20.23	57	1153.11	0.000865065		-0.77
20.22	357	7218.54	0.00541804		-0.78
20.21	50	1010.5	0.000758829		-0.79
20.2	849	17149.8	0.0128849		-0.8
20.19	0	0	0		-0.81
20.18	190	3834.2	0.00288355		-0.82
20.17	11	221.87	0.000166942		-0.83
20.16	48	967.68	0.000728476		-0.84
20.15	0	0	0		-0.85
20.14	0	0	0		-0.86
20.13	0	0	0		-0.87
20.12	0	0	0		-0.88
20.11	17	341.87	0.000258002		-0.89
20.1	304	6110.4	0.00461368		-0.9
20.09	210	4218.9	0.00318708		-0.91
20.08	52	1044.16	0.000789182		-0.92
20.07	0	0	0		-0.93
20.06	0	0	0		-0.94
20.05	0	0	0		-0.95
20.04	0	0	0		-0.96
20.03	0	0	0		-0.97
20.02	1	20.02	1.51766e-05		-0.98
20.01	18	360.18	0.000273178		-0.99
20	10	200	0.000151766		-1
19.99	0	0	0		-1.01
19.98	10	199.8	0.000151766		-1.02
19.97	0	0	0		-1.03
19.96	0	0	0		-1.04
19.95	0	0	0		-1.05
19.94	0	0	0		-1.06
19.93	0	0	0		-1.07
19.92	0	0	0		-1.08
19.91	0	0	0		-1.09
19.9	0	0	0		-1.1
19.89	0	0	0		-1.11
19.88	10	198.8	0.000151766		-1.12
19.87	0	0	0		-1.13
19.86	0	0	0		-1.14
19.85	7	138.95	0.000106236		-1.15
19.84	0	0	0		-1.16
19.83	42	832.86	0.000637416		-1.17
19.82	44	872.08	0.000667769		-1.18
	65891	20.9964
