# Supplementary material for: Interaction Wave Functions and Interaction-Based Coherence and Entanglement in Complex Adaptive Systems
Source: Research Square preprint supplement (doi:10.21203/rs.3.rs-6846233/v1), 2025-06-16
Supplement: Supplementary file 421 [file 30627.xls]

## Sheet: Sheet1
21.4	118	2525.2	0.00413977		0.46
21.39	0	0	0		0.45
21.38	0	0	0		0.44
21.37	10	213.7	0.000350828		0.43
21.36	0	0	0		0.42
21.35	220	4697	0.00771821		0.41
21.34	32	682.88	0.00112265		0.4
21.33	0	0	0		0.39
21.32	0	0	0		0.38
21.31	72	1534.32	0.00252596		0.37
21.3	410	8733	0.0143839		0.36
21.29	198	4215.42	0.00694639		0.35
21.28	149	3170.72	0.00522734		0.34
21.27	0	0	0		0.33
21.26	61	1296.86	0.00214005		0.32
21.25	328	6970	0.0115072		0.31
21.24	0	0	0		0.3
21.23	56	1188.88	0.00196464		0.29
21.22	172	3649.84	0.00603424		0.28
21.21	46	975.66	0.00161381		0.27
21.2	473	10027.6	0.0165942		0.26
21.19	1	21.19	3.50828e-05		0.25
21.18	28	593.04	0.000982318		0.24
21.17	25	529.25	0.00087707		0.23
21.16	5	105.8	0.000175414		0.22
21.15	354	7487.1	0.0124193		0.21
21.14	371	7842.94	0.0130157		0.2
21.13	91	1922.83	0.00319253		0.19
21.12	392	8279.04	0.0137525		0.18
21.11	85	1794.35	0.00298204		0.17
21.1	1966	41482.6	0.0689728		0.16
21.09	516	10882.4	0.0181027		0.15
21.08	867	18276.4	0.0304168		0.14
21.07	73	1538.11	0.00256104		0.13
21.06	186	3917.16	0.0065254		0.12
21.05	708	14903.4	0.0248386		0.11
21.04	64	1346.56	0.0022453		0.1
21.03	734	15436	0.0257508		0.09
21.02	110	2312.2	0.00385911		0.08
21.01	97	2037.97	0.00340303		0.07
21	2473	51933	0.0867598		0.06
20.99	872	18303.3	0.0305922		0.05
20.98	555	11643.9	0.019471		0.04
20.97	424	8891.28	0.0148751		0.03
20.96	429	8991.84	0.0150505		0.02
20.95	497	10412.1	0.0174361		0.01
20.94	145	3036.3	0.00508701		-7.4607e-14
20.93	325	6802.25	0.0114019		-0.01
20.92	145	3033.4	0.00508701		-0.02
20.91	447	9346.77	0.015682		-0.03
20.9	1755	36679.5	0.0615703		-0.04
20.89	110	2297.9	0.00385911		-0.05
20.88	453	9458.64	0.0158925		-0.06
20.87	237	4946.19	0.00831462		-0.07
20.86	360	7509.6	0.0126298		-0.08
20.85	597	12447.4	0.0209444		-0.09
20.84	210	4376.4	0.00736739		-0.1
20.83	1553	32349	0.0544836		-0.11
20.82	166	3456.12	0.00582374		-0.12
20.81	257	5348.17	0.00901628		-0.13
20.8	1368	28454.4	0.0479933		-0.14
20.79	530	11018.7	0.0185939		-0.15
20.78	667	13860.3	0.0234002		-0.16
20.77	267	5545.59	0.00936711		-0.17
20.76	538	11168.9	0.0188745		-0.18
20.75	292	6059	0.0102442		-0.19
20.74	486	10079.6	0.0170502		-0.2
20.73	26	538.98	0.000912153		-0.21
20.72	14	290.08	0.000491159		-0.22
20.71	393	8139.03	0.0137875		-0.23
20.7	1310	27117	0.0459585		-0.24
20.69	173	3579.37	0.00606932		-0.25
20.68	730	15096.4	0.0256104		-0.26
20.67	34	702.78	0.00119282		-0.27
20.66	60	1239.6	0.00210497		-0.28
20.65	588	12142.2	0.0206287		-0.29
	28504	20.9404
