# Supplementary material for: Interaction Wave Functions and Interaction-Based Coherence and Entanglement in Complex Adaptive Systems
Source: Research Square preprint supplement (doi:10.21203/rs.3.rs-6846233/v1), 2025-06-16
Supplement: Supplementary file 422 [file 30630.xls]

## Sheet: Sheet1
21.69	89	1930.41	0.00274488		0.47
21.68	401	8693.68	0.0123674		0.46
21.67	23	498.41	0.000709351		0.45
21.66	141	3054.06	0.00434863		0.44
21.65	813	17601.4	0.025074		0.43
21.64	14	302.96	0.000431779		0.42
21.63	33	713.79	0.00101776		0.41
21.62	233	5037.46	0.00718604		0.4
21.61	26	561.86	0.000801875		0.39
21.6	192	4147.2	0.00592154		0.38
21.59	96	2072.64	0.00296077		0.37
21.58	183	3949.14	0.00564397		0.36
21.57	38	819.66	0.00117197		0.35
21.56	95	2048.2	0.00292993		0.34
21.55	220	4741	0.0067851		0.33
21.54	0	0	0		0.32
21.53	249	5360.97	0.0076795		0.31
21.52	66	1420.32	0.00203553		0.3
21.51	26	559.26	0.000801875		0.29
21.5	1094	23521	0.0337404		0.28
21.49	65	1396.85	0.00200469		0.27
21.48	135	2899.8	0.00416358		0.26
21.47	5	107.35	0.000154207		0.25
21.46	28	600.88	0.000863558		0.24
21.45	522	11196.9	0.0160992		0.23
21.44	371	7954.24	0.0114421		0.22
21.43	101	2164.43	0.00311498		0.21
21.42	39	835.38	0.00120281		0.2
21.41	166	3554.06	0.00511966		0.19
21.4	3165	67731	0.0976129		0.18
21.39	895	19144	0.027603		0.17
21.38	702	15008.8	0.0216506		0.16
21.37	1158	24746.5	0.0357143		0.15
21.36	2411	51499	0.0743585		0.14
21.35	463	9885.05	0.0142795		0.13
21.34	519	11075.5	0.0160067		0.12
21.33	336	7166.88	0.0103627		0.11
21.32	91	1940.12	0.00280656		0.1
21.31	426	9078.06	0.0131384		0.09
21.3	1348	28712.4	0.0415741		0.08
21.29	285	6067.65	0.00878979		0.07
21.28	219	4660.32	0.00675426		0.06
21.27	90	1914.3	0.00277572		0.05
21.26	248	5272.48	0.00764866		0.04
21.25	1110	23587.5	0.0342339		0.03
21.24	2	42.48	6.16827e-05		0.02
21.23	629	13353.7	0.0193992		0.01
21.22	151	3204.22	0.00465704		-7.10543e-14
21.21	158	3351.18	0.00487293		-0.01
21.2	318	6741.6	0.00980755		-0.02
21.19	784	16613	0.0241796		-0.03
21.18	85	1800.3	0.00262151		-0.04
21.17	10	211.7	0.000308414		-0.05
21.16	0	0	0		-0.06
21.15	0	0	0		-0.07
21.14	0	0	0		-0.08
21.13	5	105.65	0.000154207		-0.09
21.12	12	253.44	0.000370096		-0.1
21.11	15	316.65	0.00046262		-0.11
21.1	946	19960.6	0.0291759		-0.12
21.09	0	0	0		-0.13
21.08	4	84.32	0.000123365		-0.14
21.07	173	3645.11	0.00533555		-0.15
21.06	18	379.08	0.000555144		-0.16
21.05	71	1494.55	0.00218974		-0.17
21.04	3	63.12	9.25241e-05		-0.18
21.03	20	420.6	0.000616827		-0.19
21.02	2	42.04	6.16827e-05		-0.2
21.01	22	462.22	0.00067851		-0.21
21	1719	36099	0.0530163		-0.22
20.99	333	6989.67	0.0102702		-0.23
20.98	288	6042.24	0.00888231		-0.24
20.97	215	4508.55	0.00663089		-0.25
20.96	93	1949.28	0.00286825		-0.26
20.95	526	11019.7	0.0162226		-0.27
20.94	11	230.34	0.000339255		-0.28
20.93	295	6174.35	0.0090982		-0.29
20.92	337	7050.04	0.0103935		-0.3
20.91	0	0	0		-0.31
20.9	2440	50996	0.0752529		-0.32
20.89	250	5222.5	0.00771034		-0.33
20.88	618	12903.8	0.01906		-0.34
20.87	8	166.96	0.000246731		-0.35
20.86	407	8490.02	0.0125524		-0.36
20.85	358	7464.3	0.0110412		-0.37
20.84	18	375.12	0.000555144		-0.38
20.83	259	5394.97	0.00798791		-0.39
20.82	119	2477.58	0.00367012		-0.4
20.81	297	6180.57	0.00915988		-0.41
20.8	999	20779.2	0.0308105		-0.42
20.79	22	457.38	0.00067851		-0.43
20.78	1	20.78	3.08414e-05		-0.44
20.77	127	2637.79	0.00391685		-0.45
20.76	0	0	0		-0.46
20.75	326	6764.5	0.0100543		-0.47
	32424	21.2242
