# Supplementary material for: Interaction Wave Functions and Interaction-Based Coherence and Entanglement in Complex Adaptive Systems
Source: Research Square preprint supplement (doi:10.21203/rs.3.rs-6846233/v1), 2025-06-16
Supplement: Supplementary file 423 [file 30602-06.xls]

## Sheet: Sheet1
0.11		329				329	36.19	0.00652855
0.1		206				206	20.6	0.00408779
0.09		292		10		302	27.18	0.00599278
0.08		125		0		125	10	0.00248045
0.07		158		242		400	28	0.00793745
0.06		126		403	21	550	33	0.010914
0.05		129		237	140	506	25.3	0.0100409
0.04	146	546		346	292	1330	53.2	0.026392
0.03	476	664	176	457	908	2681	80.43	0.0532008
0.02	1680	255	1874	1158	1816	6783	135.66	0.134599
0.01	1559	204	2150	752	3135	7800	78	0.15478
0	2275	2048	2287	1922	1184	9716	0	0.192801
-0.01	1595	1157	691	1340	2569	7352	-73.52	0.14589
-0.02	752	1513	954	763	720	4702	-94.04	0.0933048
-0.03	373	1294	493	1252	984	4396	-131.88	0.0872326
-0.04	138	1212	574	449	623	2996	-119.84	0.0594515
-0.05			205	15		220	-11	0.0043656
						50394	0.00193039
