# Supplementary material for: Interaction Wave Functions and Interaction-Based Coherence and Entanglement in Complex Adaptive Systems
Source: Research Square preprint supplement (doi:10.21203/rs.3.rs-6846233/v1), 2025-06-16
Supplement: Supplementary file 424 [file 30602.xls]

## Sheet: Sheet1
5.9	146	861.4	0.016233		0.04
5.89	476	2803.64	0.0529242		0.03
5.88	1680	9878.4	0.186791		0.02
5.87	1559	9151.33	0.173338		0.01
5.86	2275	13331.5	0.252946		0
5.85	1595	9330.75	0.17734		-0.01
5.84	752	4391.68	0.0836113		-0.02
5.83	373	2174.59	0.0414721		-0.03
5.82	138	803.16	0.0153436		-0.04
	8994	5.8624
