# Supplementary material for: Interaction Wave Functions and Interaction-Based Coherence and Entanglement in Complex Adaptive Systems
Source: Research Square preprint supplement (doi:10.21203/rs.3.rs-6846233/v1), 2025-06-16
Supplement: Supplementary file 425 [file 30603.xls]

## Sheet: Sheet1
5.9	329	1941.1	0.0320725		0.11
5.89	206	1213.34	0.0200819		0.1
5.88	292	1716.96	0.0284656		0.09
5.87	125	733.75	0.0121856		0.08
5.86	158	925.88	0.0154026		0.07
5.85	126	737.1	0.0122831		0.06
5.84	129	753.36	0.0125756		0.05
5.83	546	3183.18	0.0532267		0.04
5.82	664	3864.48	0.06473		0.03
5.81	255	1481.55	0.0248586		0.02
5.8	204	1183.2	0.0198869		0.01
5.79	2048	11857.9	0.199649		0
5.78	1157	6687.46	0.11279		-0.01
5.77	1513	8730.01	0.147495		-0.02
5.76	1294	7453.44	0.126145		-0.03
5.75	1212	6969	0.118152		-0.04
	10258	5.7937
