# Supplementary material for: Interaction Wave Functions and Interaction-Based Coherence and Entanglement in Complex Adaptive Systems
Source: Research Square preprint supplement (doi:10.21203/rs.3.rs-6846233/v1), 2025-06-16
Supplement: Supplementary file 426 [file 30604.xls]

## Sheet: Sheet1
5.73	176	1008.48	0.0187154		0.03
5.72	1874	10719.3	0.199277		0.02
5.71	2150	12276.5	0.228626		0.01
5.7	2287	13035.9	0.243194		0
5.69	691	3931.79	0.0734794		-0.01
5.68	954	5418.72	0.101446		-0.02
5.67	493	2795.31	0.0524245		-0.03
5.66	574	3248.84	0.0610379		-0.04
5.65	205	1158.25	0.0217992		-0.05
	9404	5.69897
