# Supplementary material for: Interaction Wave Functions and Interaction-Based Coherence and Entanglement in Complex Adaptive Systems
Source: Research Square preprint supplement (doi:10.21203/rs.3.rs-6846233/v1), 2025-06-16
Supplement: Supplementary file 427 [file 30605.xls]

## Sheet: Sheet1
5.77	10	57.7	0.00106998		0.09
5.76	0	0	0		0.08
5.75	242	1391.5	0.0258934		0.07
5.74	403	2313.22	0.0431201		0.06
5.73	237	1358.01	0.0253584		0.05
5.72	346	1979.12	0.0370212		0.04
5.71	457	2609.47	0.0488979		0.03
5.7	1158	6600.6	0.123903		0.02
5.69	752	4278.88	0.0804622		0.01
5.68	1922	10917	0.205649		0
5.67	1340	7597.8	0.143377		-0.01
5.66	763	4318.58	0.0816392		-0.02
5.65	1252	7073.8	0.133961		-0.03
5.64	449	2532.36	0.0480419		-0.04
5.63	15	84.45	0.00160496		-0.05
	9346	5.68291
