# Supplementary material for: Interaction Wave Functions and Interaction-Based Coherence and Entanglement in Complex Adaptive Systems
Source: Research Square preprint supplement (doi:10.21203/rs.3.rs-6846233/v1), 2025-06-16
Supplement: Supplementary file 428 [file 30606.xls]

## Sheet: Sheet1
5.65	21	118.65	0.00169464		0.06
5.64	140	789.6	0.0112976		0.05
5.63	292	1643.96	0.0235636		0.04
5.62	908	5102.96	0.0732731		0.03
5.61	1816	10187.8	0.146546		0.02
5.6	3135	17556	0.252986		0.01
5.59	1184	6618.56	0.0955455		0
5.58	2569	14335	0.207311		-0.01
5.57	720	4010.4	0.058102		-0.02
5.56	984	5471.04	0.0794061		-0.03
5.55	623	3457.65	0.0502744		-0.04
	12392	5.59164
