# Supplementary material for: Interaction Wave Functions and Interaction-Based Coherence and Entanglement in Complex Adaptive Systems
Source: Research Square preprint supplement (doi:10.21203/rs.3.rs-6846233/v1), 2025-06-16
Supplement: Supplementary file 429 [file 30609-13.xls]

## Sheet: Sheet1
0.06					123	123	7.38	0.00477818
0.05		25	34	63	175	297	14.85	0.0115376
0.04	154	19	528	25	300	1026	41.04	0.039857
0.03	445	103	1288	90	191	2117	63.51	0.0822391
0.02	866	762	248	172	822	2870	57.4	0.111491
0.01	1528	845	275	1287	613	4548	45.48	0.176676
0	377	818	785	2919	267	5166	0	0.200684
-0.01	523	806	445	943	1189	3906	-39.06	0.151736
-0.02	540	382	494		621	2037	-40.74	0.0791314
-0.03	140	149	426		325	1040	-31.2	0.0404009
-0.04	473		475		1181	2129	-85.16	0.0827053
-0.05			325		23	348	-17.4	0.0135188
-0.06			135			135	-8.1	0.00524435
						25742	0.000310776
