# Supplementary material for: Interaction Wave Functions and Interaction-Based Coherence and Entanglement in Complex Adaptive Systems
Source: Research Square preprint supplement (doi:10.21203/rs.3.rs-6846233/v1), 2025-06-16
Supplement: Supplementary file 430 [file 30609.xls]

## Sheet: Sheet1
5.58	154	859.32	0.0305192		0.04
5.57	445	2478.65	0.0881887		0.03
5.56	866	4814.96	0.171621		0.02
5.55	1528	8480.4	0.302814		0.01
5.54	377	2088.58	0.0747126		0
5.53	523	2892.19	0.103646		-0.01
5.52	540	2980.8	0.107015		-0.02
5.51	140	771.4	0.0277447		-0.03
5.5	473	2601.5	0.0937376		-0.04
	5046	5.54257
