# Supplementary material for: Interaction Wave Functions and Interaction-Based Coherence and Entanglement in Complex Adaptive Systems
Source: Research Square preprint supplement (doi:10.21203/rs.3.rs-6846233/v1), 2025-06-16
Supplement: Supplementary file 431 [file 30610.xls]

## Sheet: Sheet1
5.63	25	140.75	0.0063955		0.05
5.62	19	106.78	0.00486058		0.04
5.61	103	577.83	0.0263494		0.03
5.6	762	4267.2	0.194935		0.02
5.59	845	4723.55	0.216168		0.01
5.58	818	4564.44	0.209261		0
5.57	806	4489.42	0.206191		-0.01
5.56	382	2123.92	0.0977232		-0.02
5.55	149	826.95	0.0381172		-0.03
	3909	5.58221
