# Supplementary material for: Interaction Wave Functions and Interaction-Based Coherence and Entanglement in Complex Adaptive Systems
Source: Research Square preprint supplement (doi:10.21203/rs.3.rs-6846233/v1), 2025-06-16
Supplement: Supplementary file 432 [file 30611.xls]

## Sheet: Sheet1
5.67	34	192.78	0.00622939		0.05
5.66	528	2988.48	0.0967387		0.04
5.65	1288	7277.2	0.235984		0.03
5.64	248	1398.72	0.0454379		0.02
5.63	275	1548.25	0.0503848		0.01
5.62	785	4411.7	0.143826		0
5.61	445	2496.45	0.0815317		-0.01
5.6	494	2766.4	0.0905093		-0.02
5.59	426	2381.34	0.0780506		-0.03
5.58	475	2650.5	0.0870282		-0.04
5.57	325	1810.25	0.0595456		-0.05
5.56	135	750.6	0.0247343		-0.06
	5458	5.61976
