# Supplementary material for: Interaction Wave Functions and Interaction-Based Coherence and Entanglement in Complex Adaptive Systems
Source: Research Square preprint supplement (doi:10.21203/rs.3.rs-6846233/v1), 2025-06-16
Supplement: Supplementary file 433 [file 30612.xls]

## Sheet: Sheet1
5.66	63	356.58	0.0114566		0.05
5.65	25	141.25	0.00454628		0.04
5.64	90	507.6	0.0163666		0.03
5.63	172	968.36	0.0312784		0.02
5.62	1287	7232.94	0.234043		0.01
5.61	2919	16375.6	0.530824		0
5.6	943	5280.8	0.171486		-0.01
	5499	5.6125
