# Supplementary material for: Interaction Wave Functions and Interaction-Based Coherence and Entanglement in Complex Adaptive Systems
Source: Research Square preprint supplement (doi:10.21203/rs.3.rs-6846233/v1), 2025-06-16
Supplement: Supplementary file 434 [file 30613.xls]

## Sheet: Sheet1
5.7	123	701.1	0.0210978		0.06
5.69	175	995.75	0.0300172		0.05
5.68	300	1704	0.051458		0.04
5.67	191	1082.97	0.0327616		0.03
5.66	822	4652.52	0.140995		0.02
5.65	613	3463.45	0.105146		0.01
5.64	267	1505.88	0.0457976		0
5.63	1189	6694.07	0.203945		-0.01
5.62	621	3490.02	0.106518		-0.02
5.61	325	1823.25	0.0557461		-0.03
5.6	1181	6613.6	0.202573		-0.04
5.59	23	128.57	0.00394511		-0.05
	5830	5.63554
