# Supplementary material for: Interaction Wave Functions and Interaction-Based Coherence and Entanglement in Complex Adaptive Systems
Source: Research Square preprint supplement (doi:10.21203/rs.3.rs-6846233/v1), 2025-06-16
Supplement: Supplementary file 435 [file 30616-20.xls]

## Sheet: Sheet1
0.07				10		10	0.7	0.00036245
0.06		70		124		194	11.64	0.00703153
0.05		202	21	107		330	16.5	0.0119609
0.04		70	115	203		388	15.52	0.0140631
0.03	51	0	618	335	5	1009	30.27	0.0365712
0.02	1579	317	479	565	50	2990	59.8	0.108373
0.01	1949	262	1085	1417	1546	6259	62.59	0.226858
0	2819	1660	574	474	1952	7479	0	0.271076
-0.01	519	905	1049	809	410	3692	-36.92	0.133817
-0.02	493	5	1007	2318	227	4050	-81	0.146792
-0.03	291			751	0	1042	-31.26	0.0377673
-0.04	15				132	147	-5.88	0.00532802
						27590	0.00152084
