# Supplementary material for: Interaction Wave Functions and Interaction-Based Coherence and Entanglement in Complex Adaptive Systems
Source: Research Square preprint supplement (doi:10.21203/rs.3.rs-6846233/v1), 2025-06-16
Supplement: Supplementary file 436 [file 30616.xls]

## Sheet: Sheet1
5.71	51	291.21	0.00660964		0.03
5.7	1579	9000.3	0.20464		0.02
5.69	1949	11089.8	0.252592		0.01
5.68	2819	16011.9	0.365345		0
5.67	519	2942.73	0.0672628		-0.01
5.66	493	2790.38	0.0638932		-0.02
5.65	291	1644.15	0.0377138		-0.03
5.64	15	84.6	0.00194401		-0.04
	7716	5.68366
