# Supplementary material for: Interaction Wave Functions and Interaction-Based Coherence and Entanglement in Complex Adaptive Systems
Source: Research Square preprint supplement (doi:10.21203/rs.3.rs-6846233/v1), 2025-06-16
Supplement: Supplementary file 437 [file 30617.xls]

## Sheet: Sheet1
5.72	70	400.4	0.0200516		0.06
5.71	202	1153.42	0.0578631		0.05
5.7	70	399	0.0200516		0.04
5.69	0	0	0		0.03
5.68	317	1800.56	0.0908049		0.02
5.67	262	1485.54	0.0750501		0.01
5.66	1660	9395.6	0.475508		0
5.65	905	5113.25	0.259238		-0.01
5.64	5	28.2	0.00143225		-0.02
	3491	5.66484
