# Supplementary material for: Interaction Wave Functions and Interaction-Based Coherence and Entanglement in Complex Adaptive Systems
Source: Research Square preprint supplement (doi:10.21203/rs.3.rs-6846233/v1), 2025-06-16
Supplement: Supplementary file 438 [file 30618.xls]

## Sheet: Sheet1
5.67	21	119.07	0.00424414		0.05
5.66	115	650.9	0.0232417		0.04
5.65	618	3491.7	0.124899		0.03
5.64	479	2701.56	0.0968068		0.02
5.63	1085	6108.55	0.219281		0.01
5.62	574	3225.88	0.116006		0
5.61	1049	5884.89	0.212005		-0.01
5.6	1007	5639.2	0.203517		-0.02
	4948	5.62283
