# Supplementary material for: Interaction Wave Functions and Interaction-Based Coherence and Entanglement in Complex Adaptive Systems
Source: Research Square preprint supplement (doi:10.21203/rs.3.rs-6846233/v1), 2025-06-16
Supplement: Supplementary file 439 [file 30619.xls]

## Sheet: Sheet1
5.61	10	56.1	0.00140588		0.07
5.6	124	694.4	0.0174329		0.06
5.59	107	598.13	0.0150429		0.05
5.58	203	1132.74	0.0285393		0.04
5.57	335	1865.95	0.0470969		0.03
5.56	565	3141.4	0.079432		0.02
5.55	1417	7864.35	0.199213		0.01
5.54	474	2625.96	0.0666385		0
5.53	809	4473.77	0.113735		-0.01
5.52	2318	12795.4	0.325882		-0.02
5.51	751	4138.01	0.105581		-0.03
	7113	5.53721
