# Supplementary material for: Interaction Wave Functions and Interaction-Based Coherence and Entanglement in Complex Adaptive Systems
Source: Research Square preprint supplement (doi:10.21203/rs.3.rs-6846233/v1), 2025-06-16
Supplement: Supplementary file 440 [file 30620.xls]

## Sheet: Sheet1
5.57	5	27.85	0.00115687		0.03
5.56	50	278	0.0115687		0.02
5.55	1546	8580.3	0.357705		0.01
5.54	1952	10814.1	0.451643		0
5.53	410	2267.3	0.0948635		-0.01
5.52	227	1253.04	0.052522		-0.02
5.51	0	0	0		-0.03
5.5	132	726	0.0305414		-0.04
	4322	5.54062
