# Supplementary material for: Interaction Wave Functions and Interaction-Based Coherence and Entanglement in Complex Adaptive Systems
Source: Research Square preprint supplement (doi:10.21203/rs.3.rs-6846233/v1), 2025-06-16
Supplement: Supplementary file 441 [file 30623-27.xls]

## Sheet: Sheet1
0.08					23	23		0.000639493
0.07					0	0		0
0.06				327	114	441		0.0122616
0.05				344	53	397		0.0110382
0.04			107	1388	491	1986		0.0552188
0.03			0	261	3519	3780		0.105099
0.02	206	74	608	971	952	2811		0.0781571
0.01	554	434	1273	378	2280	4919		0.136768
0	2271	1245	818	455	3846	8635		0.240088
-0.01	1489	1341	470	274	625	4199		0.116749
-0.02	112	399	290	503	2903	4207		0.116972
-0.03	29		577	543	1493	2642		0.0734583
-0.04				0	893	893		0.024829
-0.05				222		222		0.0061725
-0.06				615		615		0.0170995
-0.07				104		104		0.00289162
-0.08				92		92		0.00255797
						35966
