# Supplementary material for: Interaction Wave Functions and Interaction-Based Coherence and Entanglement in Complex Adaptive Systems
Source: Research Square preprint supplement (doi:10.21203/rs.3.rs-6846233/v1), 2025-06-16
Supplement: Supplementary file 442 [file 30623.xls]

## Sheet: Sheet1
5.55	206	1143.3	0.0441965		0.02
5.54	554	3069.16	0.118859		0.01
5.53	2271	12558.6	0.487234		0
5.52	1489	8219.28	0.319459		-0.01
5.51	112	617.12	0.0240292		-0.02
5.5	29	159.5	0.00622184		-0.03
	4661	5.52821
