# Supplementary material for: Interaction Wave Functions and Interaction-Based Coherence and Entanglement in Complex Adaptive Systems
Source: Research Square preprint supplement (doi:10.21203/rs.3.rs-6846233/v1), 2025-06-16
Supplement: Supplementary file 443 [file 30624.xls]

## Sheet: Sheet1
5.57	74	412.18	0.0211852		0.02
5.56	434	2413.04	0.124248		0.01
5.55	1245	6909.75	0.356427		0
5.54	1341	7429.14	0.383911		-0.01
5.53	399	2206.47	0.114228		-0.02
	3493	5.54554
