# Supplementary material for: Interaction Wave Functions and Interaction-Based Coherence and Entanglement in Complex Adaptive Systems
Source: Research Square preprint supplement (doi:10.21203/rs.3.rs-6846233/v1), 2025-06-16
Supplement: Supplementary file 444 [file 30625.xls]

## Sheet: Sheet1
5.57	107	595.99	0.0258267		0.04
5.56	0	0	0		0.03
5.55	608	3374.4	0.146754		0.02
5.54	1273	7052.42	0.307265		0.01
5.53	818	4523.54	0.197441		0
5.52	470	2594.4	0.113444		-0.01
5.51	290	1597.9	0.0699976		-0.02
5.5	577	3173.5	0.139271		-0.03
	4143	5.53033
