# Supplementary material for: Interaction Wave Functions and Interaction-Based Coherence and Entanglement in Complex Adaptive Systems
Source: Research Square preprint supplement (doi:10.21203/rs.3.rs-6846233/v1), 2025-06-16
Supplement: Supplementary file 445 [file 30626.xls]

## Sheet: Sheet1
5.52	327	1805.04	0.0504863		0.06
5.51	344	1895.44	0.053111		0.05
5.5	1388	7634	0.214297		0.04
5.49	261	1432.89	0.0402964		0.03
5.48	971	5321.08	0.149915		0.02
5.47	378	2067.66	0.0583604		0.01
5.46	455	2484.3	0.0702486		0
5.45	274	1493.3	0.0423035		-0.01
5.44	503	2736.32	0.0776594		-0.02
5.43	543	2948.49	0.0838351		-0.03
5.42	0	0	0		-0.04
5.41	222	1201.02	0.0342751		-0.05
5.4	615	3321	0.0949514		-0.06
5.39	104	560.56	0.0160568		-0.07
5.38	92	494.96	0.0142041		-0.08
	6477	5.46488
