# Supplementary material for: Interaction Wave Functions and Interaction-Based Coherence and Entanglement in Complex Adaptive Systems
Source: Research Square preprint supplement (doi:10.21203/rs.3.rs-6846233/v1), 2025-06-16
Supplement: Supplementary file 446 [file 30627.xls]

## Sheet: Sheet1
5.52	23	126.96	0.00133783		0.08
5.51	0	0	0		0.07
5.5	114	627	0.00663099		0.06
5.49	53	290.97	0.00308283		0.05
5.48	491	2690.68	0.0285598		0.04
5.47	3519	19248.9	0.204688		0.03
5.46	952	5197.92	0.0553746		0.02
5.45	2280	12426	0.13262		0.01
5.44	3846	20922.2	0.223709		0
5.43	625	3393.75	0.0363541		-0.01
5.42	2903	15734.3	0.168858		-0.02
5.41	1493	8077.13	0.0868427		-0.03
5.4	893	4822.2	0.0519428		-0.04
	17192	5.44195
