# Supplementary material for: Interaction Wave Functions and Interaction-Based Coherence and Entanglement in Complex Adaptive Systems
Source: Research Square preprint supplement (doi:10.21203/rs.3.rs-6846233/v1), 2025-06-16
Supplement: Supplementary file 447 [file 30602-06.xls]

## Sheet: Sheet1
0.22				13		13	2.86	0.000170709
0.21		232	290	87		609	127.89	0.00799706
0.2		20	167	647		834	166.8	0.0109516
0.19	91	53	357	139		640	121.6	0.00840413
0.18	130	208	170	488		996	179.28	0.0130789
0.17	271	185	120	507		1083	184.11	0.0142214
0.16	252	148	153	474	158	1185	189.6	0.0155608
0.15	418	348	6	302	148	1222	183.3	0.0160466
0.14	1105	472	13	177	178	1945	272.3	0.0255407
0.13	826	420	209	35	308	1798	233.74	0.0236104
0.12	1048	554	110	129	377	2218	266.16	0.0291256
0.11	1043	175	36	48	941	2243	246.73	0.0294539
0.1	446	114	56	18	214	848	84.8	0.0111355
0.09	327	694	78	40	406	1545	139.05	0.0202881
0.08	675	279	132	180	455	1721	137.68	0.0225992
0.07	443	166	404	89	366	1468	102.76	0.019277
0.06	451	123	408	24	719	1725	103.5	0.0226518
0.05	451	276	93	155	498	1473	73.65	0.0193426
0.04	759	1517	278	137	452	3143	125.72	0.0412722
0.03	346	132	102	615	1107	2302	69.06	0.0302286
0.02	279	384	293	1552	1198	3706	74.12	0.0486652
0.01	72	347	195	1279	517	2410	24.1	0.0316468
-5.89806e-17	481	1370	48	1131	257	3287	-1.93869e-13	0.0431631
-0.01	951	1274	213	1102	50	3590	-35.9	0.0471419
-0.02	93	413	353	1185	1159	3203	-64.06	0.0420601
-0.03	61	441	488	1109	315	2414	-72.42	0.0316993
-0.04	324	834	754	663	820	3395	-135.8	0.0445813
-0.05	734	461	435	2	51	1683	-84.15	0.0221002
-0.06	1282	600	124	43	15	2064	-123.84	0.0271033
-0.07	291	16	340	562	127	1336	-93.52	0.0175436
-0.08	650	13	18	4307	4	4992	-399.36	0.0655522
-0.09	0	28	574	520	102	1224	-110.16	0.0160729
-0.1	834	162	244	300	224	1764	-176.4	0.0231639
-0.11	494	594	192		839	2119	-233.09	0.0278256
-0.12	0	223	50		2431	2704	-324.48	0.0355075
-0.13	49	629	52		3	733	-95.29	0.00962536
-0.14	409	242	126		190	967	-135.38	0.0126981
-0.15	663	1109	87			1859	-278.85	0.0244114
-0.16	1797	636	218			2651	-424.16	0.0348115
-0.17	0		371			371	-63.07	0.00487177
-0.18	155		220			375	-67.5	0.0049243
-0.19	165		130			295	-56.05	0.00387378
						76153	0.00177708
