# Supplementary material for: Interaction Wave Functions and Interaction-Based Coherence and Entanglement in Complex Adaptive Systems
Source: Research Square preprint supplement (doi:10.21203/rs.3.rs-6846233/v1), 2025-06-16
Supplement: Supplementary file 448 [file 30602.xls]

## Sheet: Sheet1
14.65	91	1333.15	0.00482349		0.19
14.64	130	1903.2	0.0068907		0.18
14.63	271	3964.73	0.0143645		0.17
14.62	252	3684.24	0.0133574		0.16
14.61	418	6106.98	0.0221563		0.15
14.6	1105	16133	0.058571		0.14
14.59	826	12051.3	0.0437825		0.13
14.58	1048	15279.8	0.0555497		0.12
14.57	1043	15196.5	0.0552846		0.11
14.56	446	6493.76	0.0236404		0.1
14.55	327	4757.85	0.0173328		0.09
14.54	675	9814.5	0.0357786		0.08
14.53	443	6436.79	0.0234814		0.07
14.52	451	6548.52	0.0239054		0.06
14.51	451	6544.01	0.0239054		0.05
14.5	759	11005.5	0.0402311		0.04
14.49	346	5013.54	0.0183399		0.03
14.48	279	4039.92	0.0147885		0.02
14.47	72	1041.84	0.00381639		0.01
14.46	481	6955.26	0.0254956		0
14.45	951	13742	0.0504081		-0.01
14.44	93	1342.92	0.0049295		-0.02
14.43	61	880.23	0.00323333		-0.03
14.42	324	4672.08	0.0171738		-0.04
14.41	734	10576.9	0.038906		-0.05
14.4	1282	18460.8	0.0679529		-0.06
14.39	291	4187.49	0.0154246		-0.07
14.38	650	9347	0.0344535		-0.08
14.37	0	0	0		-0.09
14.36	834	11976.2	0.0442065		-0.1
14.35	494	7088.9	0.0261847		-0.11
14.34	0	0	0		-0.12
14.33	49	702.17	0.00259726		-0.13
14.32	409	5856.88	0.0216792		-0.14
14.31	663	9487.53	0.0351426		-0.15
14.3	1797	25697.1	0.0952507		-0.16
14.29	0	0	0		-0.17
14.28	155	2213.4	0.00821584		-0.18
14.27	165	2354.55	0.00874589		-0.19
	18866	14.4647
