# Supplementary material for: Interaction Wave Functions and Interaction-Based Coherence and Entanglement in Complex Adaptive Systems
Source: Research Square preprint supplement (doi:10.21203/rs.3.rs-6846233/v1), 2025-06-16
Supplement: Supplementary file 449 [file 30603.xls]

## Sheet: Sheet1
14.62	232	3391.84	0.0145985		0.21
14.61	20	292.2	0.00125849		0.2
14.6	53	773.8	0.00333501		0.19
14.59	208	3034.72	0.0130883		0.18
14.58	185	2697.3	0.0116411		0.17
14.57	148	2156.36	0.00931286		0.16
14.56	348	5066.88	0.0218978		0.15
14.55	472	6867.6	0.0297005		0.14
14.54	420	6106.8	0.0264284		0.13
14.53	554	8049.62	0.0348603		0.12
14.52	175	2541	0.0110118		0.11
14.51	114	1654.14	0.00717342		0.1
14.5	694	10063	0.0436698		0.09
14.49	279	4042.71	0.017556		0.08
14.48	166	2403.68	0.0104455		0.07
14.47	123	1779.81	0.00773974		0.06
14.46	276	3990.96	0.0173672		0.05
14.45	1517	21920.7	0.0954568		0.04
14.44	132	1906.08	0.00830607		0.03
14.43	384	5541.12	0.0241631		0.02
14.42	347	5003.74	0.0218349		0.01
14.41	1370	19741.7	0.0862069		0
14.4	1274	18345.6	0.0801661		-0.01
14.39	413	5943.07	0.0259879		-0.02
14.38	441	6341.58	0.0277498		-0.03
14.37	834	11984.6	0.0524792		-0.04
14.36	461	6619.96	0.0290083		-0.05
14.35	600	8610	0.0377548		-0.06
14.34	16	229.44	0.0010068		-0.07
14.33	13	186.29	0.000818022		-0.08
14.32	28	400.96	0.00176189		-0.09
14.31	162	2318.22	0.0101938		-0.1
14.3	594	8494.2	0.0373773		-0.11
14.29	223	3186.67	0.0140322		-0.12
14.28	629	8982.12	0.0395797		-0.13
14.27	242	3453.34	0.0152278		-0.14
14.26	1109	15814.3	0.0697835		-0.15
14.25	636	9063	0.0400201		-0.16
	15892	14.4097
