# Supplementary material for: Interaction Wave Functions and Interaction-Based Coherence and Entanglement in Complex Adaptive Systems
Source: Research Square preprint supplement (doi:10.21203/rs.3.rs-6846233/v1), 2025-06-16
Supplement: Supplementary file 450 [file 30604.xls]

## Sheet: Sheet1
14.5	290	4205	0.0333065		0.21
14.49	167	2419.83	0.01918		0.2
14.48	357	5169.36	0.0410015		0.19
14.47	170	2459.9	0.0195245		0.18
14.46	120	1735.2	0.013782		0.17
14.45	153	2210.85	0.0175721		0.16
14.44	6	86.64	0.000689101		0.15
14.43	13	187.59	0.00149305		0.14
14.42	209	3013.78	0.0240037		0.13
14.41	110	1585.1	0.0126335		0.12
14.4	36	518.4	0.0041346		0.11
14.39	56	805.84	0.00643161		0.1
14.38	78	1121.64	0.00895831		0.09
14.37	132	1896.84	0.0151602		0.08
14.36	404	5801.44	0.0463994		0.07
14.35	408	5854.8	0.0468588		0.06
14.34	93	1333.62	0.0106811		0.05
14.33	278	3983.74	0.0319283		0.04
14.32	102	1460.64	0.0117147		0.03
14.31	293	4192.83	0.0336511		0.02
14.3	195	2788.5	0.0223958		0.01
14.29	48	685.92	0.00551281		0
14.28	213	3041.64	0.0244631		-0.01
14.27	353	5037.31	0.0405421		-0.02
14.26	488	6958.88	0.0560469		-0.03
14.25	754	10744.5	0.086597		-0.04
14.24	435	6194.4	0.0499598		-0.05
14.23	124	1764.52	0.0142414		-0.06
14.22	340	4834.8	0.039049		-0.07
14.21	18	255.78	0.0020673		-0.08
14.2	574	8150.8	0.065924		-0.09
14.19	244	3462.36	0.0280234		-0.1
14.18	192	2722.56	0.0220512		-0.11
14.17	50	708.5	0.00574251		-0.12
14.16	52	736.32	0.00597221		-0.13
14.15	126	1782.9	0.0144711		-0.14
14.14	87	1230.18	0.00999196		-0.15
14.13	218	3080.34	0.0250373		-0.16
14.12	371	5238.52	0.0426094		-0.17
14.11	220	3104.2	0.025267		-0.18
14.1	130	1833	0.0149305		-0.19
	8707	14.2872
