# Supplementary material for: Interaction Wave Functions and Interaction-Based Coherence and Entanglement in Complex Adaptive Systems
Source: Research Square preprint supplement (doi:10.21203/rs.3.rs-6846233/v1), 2025-06-16
Supplement: Supplementary file 451 [file 30605.xls]

## Sheet: Sheet1
14.4	13	187.2	0.000719863		0.22
14.39	87	1251.93	0.00481754		0.21
14.38	647	9303.86	0.035827		0.2
14.37	139	1997.43	0.00769699		0.19
14.36	488	7007.68	0.0270225		0.18
14.35	507	7275.45	0.0280746		0.17
14.34	474	6797.16	0.0262473		0.16
14.33	302	4327.66	0.016723		0.15
14.32	177	2534.64	0.00980121		0.14
14.31	35	500.85	0.00193809		0.13
14.3	129	1844.7	0.00714325		0.12
14.29	48	685.92	0.00265795		0.11
14.28	18	257.04	0.000996733		0.1
14.27	40	570.8	0.00221496		0.09
14.26	180	2566.8	0.00996733		0.08
14.25	89	1268.25	0.00492829		0.07
14.24	24	341.76	0.00132898		0.06
14.23	155	2205.65	0.00858298		0.05
14.22	137	1948.14	0.00758625		0.04
14.21	615	8739.15	0.034055		0.03
14.2	1552	22038.4	0.0859405		0.02
14.19	1279	18149	0.0708234		0.01
14.18	1131	16037.6	0.0626281		0
14.17	1102	15615.3	0.0610222		-0.01
14.16	1185	16779.6	0.0656183		-0.02
14.15	1109	15692.4	0.0614098		-0.03
14.14	663	9374.82	0.036713		-0.04
14.13	2	28.26	0.000110748		-0.05
14.12	43	607.16	0.00238108		-0.06
14.11	562	7929.82	0.0311202		-0.07
14.1	4307	60728.7	0.238496		-0.08
14.09	520	7326.8	0.0287945		-0.09
14.08	300	4224	0.0166122		-0.1
	18059	14.1837
