# Supplementary material for: Interaction Wave Functions and Interaction-Based Coherence and Entanglement in Complex Adaptive Systems
Source: Research Square preprint supplement (doi:10.21203/rs.3.rs-6846233/v1), 2025-06-16
Supplement: Supplementary file 452 [file 30606.xls]

## Sheet: Sheet1
14.28	158	2256.24	0.0108005		0.16
14.27	148	2111.96	0.0101169		0.15
14.26	178	2538.28	0.0121676		0.14
14.25	308	4389	0.0210541		0.13
14.24	377	5368.48	0.0257707		0.12
14.23	941	13390.4	0.0643243		0.11
14.22	214	3043.08	0.0146285		0.1
14.21	406	5769.26	0.0277531		0.09
14.2	455	6461	0.0311026		0.08
14.19	366	5193.54	0.0250188		0.07
14.18	719	10195.4	0.049149		0.06
14.17	498	7056.66	0.034042		0.05
14.16	452	6400.32	0.0308975		0.04
14.15	1107	15664.1	0.0756716		0.03
14.14	1198	16939.7	0.0818921		0.02
14.13	517	7305.21	0.0353408		0.01
14.12	257	3628.84	0.0175678		0
14.11	50	705.5	0.00341787		-0.01
14.1	1159	16341.9	0.0792262		-0.02
14.09	315	4438.35	0.0215326		-0.03
14.08	820	11545.6	0.056053		-0.04
14.07	51	717.57	0.00348623		-0.05
14.06	15	210.9	0.00102536		-0.06
14.05	127	1784.35	0.00868139		-0.07
14.04	4	56.16	0.000273429		-0.08
14.03	102	1431.06	0.00697245		-0.09
14.02	224	3140.48	0.0153121		-0.1
14.01	839	11754.4	0.0573518		-0.11
14	2431	34034	0.166177		-0.12
13.99	3	41.97	0.000205072		-0.13
13.98	190	2656.2	0.0129879		-0.14
	14629	14.1206
