# Supplementary material for: Interaction Wave Functions and Interaction-Based Coherence and Entanglement in Complex Adaptive Systems
Source: Research Square preprint supplement (doi:10.21203/rs.3.rs-6846233/v1), 2025-06-16
Supplement: Supplementary file 453 [file 30609-13.xls]

## Sheet: Sheet1
0.19			109		10	119	22.61	0.00169097
0.18			205		0	205	36.9	0.00291301
0.17			232		0	232	39.44	0.00329667
0.16			383		0	383	61.28	0.00544235
0.15			214		13	227	34.05	0.00322562
0.14			706		168	874	122.36	0.0124194
0.13			223	47	62	332	43.16	0.00471765
0.12	184		118	334	10	646	77.52	0.00917953
0.11	262	376	67	387	35	1127	123.97	0.0160144
0.1	539	419	83	267	0	1308	130.8	0.0185864
0.09	484	110	305	312	377	1588	142.92	0.0225652
0.08	1004	419	175	1681	332	3611	288.88	0.0513116
0.07	774	177	304	1428	430	3113	217.91	0.0442351
0.06	501	736	270	837	607	2951	177.06	0.0419331
0.05	1645	550	249	987	255	3686	184.3	0.0523773
0.04	916	540	1204	1439	276	4375	175	0.0621678
0.03	193	712	526	994	479	2904	87.12	0.0412652
0.02	298	531	1224	860	148	3061	61.22	0.0434962
0.01	180	740	457	604	653	2634	26.34	0.0374286
-3.1225e-17	804	1008	977	256	414	3459	-1.08007e-13	0.0491517
-0.01	743	762	1791	122	471	3889	-38.89	0.0552619
-0.02	1243	839	1322	821	300	4525	-90.5	0.0642993
-0.03	795	1022	431	161	321	2730	-81.9	0.0387927
-0.04	457	1370	246	1032	1083	4188	-167.52	0.0595106
-0.05	640	547	555	28	94	1864	-93.2	0.0264871
-0.06	416	547	3419	122	141	4645	-278.7	0.0660045
-0.07	176	322	1755	458	112	2823	-197.61	0.0401142
-0.08	233	268	300	636	170	1607	-128.56	0.0228351
-0.09	75	330		426	225	1056	-95.04	0.0150055
-0.1	160	121		380	0	661	-66.1	0.00939267
-0.11	251	42		408	0	701	-77.11	0.00996107
-0.12	733	18		1178	85	2014	-241.68	0.0286185
-0.13	416			484	60	960	-124.8	0.0136414
-0.14	171			321	330	822	-115.08	0.0116805
-0.15	386			17	6	409	-61.35	0.00581181
-0.16	0			196		196	-31.36	0.00278512
-0.17	224			50		274	-46.58	0.00389348
-0.18	84					84	-15.12	0.00119362
-0.19	1					1	-0.19	1.42098e-05
-0.2	90					90	-18	0.00127888
						70374	0.00118723
