# Supplementary material for: Interaction Wave Functions and Interaction-Based Coherence and Entanglement in Complex Adaptive Systems
Source: Research Square preprint supplement (doi:10.21203/rs.3.rs-6846233/v1), 2025-06-16
Supplement: Supplementary file 454 [file 30609.xls]

## Sheet: Sheet1
14.32	184	2634.88	0.0122032		0.12
14.31	262	3749.22	0.0173763		0.11
14.3	539	7707.7	0.0357474		0.1
14.29	484	6916.36	0.0320997		0.09
14.28	1004	14337.1	0.0665871		0.08
14.27	774	11045	0.0513331		0.07
14.26	501	7144.26	0.0332272		0.06
14.25	1645	23441.3	0.109099		0.05
14.24	916	13043.8	0.0607508		0.04
14.23	193	2746.39	0.0128001		0.03
14.22	298	4237.56	0.0197639		0.02
14.21	180	2557.8	0.0119379		0.01
14.2	804	11416.8	0.0533227		0
14.19	743	10543.2	0.0492771		-0.01
14.18	1243	17625.7	0.082438		-0.02
14.17	795	11265.2	0.0527258		-0.03
14.16	457	6471.12	0.0303091		-0.04
14.15	640	9056	0.0424459		-0.05
14.14	416	5882.24	0.0275899		-0.06
14.13	176	2486.88	0.0116726		-0.07
14.12	233	3289.96	0.015453		-0.08
14.11	75	1058.25	0.00497413		-0.09
14.1	160	2256	0.0106115		-0.1
14.09	251	3536.59	0.0166468		-0.11
14.08	733	10320.6	0.0486139		-0.12
14.07	416	5853.12	0.0275899		-0.13
14.06	171	2404.26	0.011341		-0.14
14.05	386	5423.3	0.0256002		-0.15
14.04	0	0	0		-0.16
14.03	224	3142.72	0.0148561		-0.17
14.02	84	1177.68	0.00557103		-0.18
14.01	1	14.01	6.63218e-05		-0.19
14	90	1260	0.00596896		-0.2
	15078	14.1958
