# Supplementary material for: Interaction Wave Functions and Interaction-Based Coherence and Entanglement in Complex Adaptive Systems
Source: Research Square preprint supplement (doi:10.21203/rs.3.rs-6846233/v1), 2025-06-16
Supplement: Supplementary file 455 [file 30610.xls]

## Sheet: Sheet1
14.45	376	5433.2	0.0300656		0.11
14.44	419	6050.36	0.0335039		0.1
14.43	110	1587.3	0.00879578		0.09
14.42	419	6041.98	0.0335039		0.08
14.41	177	2550.57	0.0141532		0.07
14.4	736	10598.4	0.0588518		0.06
14.39	550	7914.5	0.0439789		0.05
14.38	540	7765.2	0.0431793		0.04
14.37	712	10231.4	0.0569327		0.03
14.36	531	7625.16	0.0424596		0.02
14.35	740	10619	0.0591716		0.01
14.34	1008	14454.7	0.0806013		0
14.33	762	10919.5	0.0609308		-0.01
14.32	839	12014.5	0.0670878		-0.02
14.31	1022	14624.8	0.0817208		-0.03
14.3	1370	19591	0.109547		-0.04
14.29	547	7816.63	0.043739		-0.05
14.28	547	7811.16	0.043739		-0.06
14.27	322	4594.94	0.0257476		-0.07
14.26	268	3821.68	0.0214297		-0.08
14.25	330	4702.5	0.0263873		-0.09
14.24	121	1723.04	0.00967536		-0.1
14.23	42	597.66	0.00335839		-0.11
14.22	18	255.96	0.00143931		-0.12
	12506	14.3407
