# Supplementary material for: Interaction Wave Functions and Interaction-Based Coherence and Entanglement in Complex Adaptive Systems
Source: Research Square preprint supplement (doi:10.21203/rs.3.rs-6846233/v1), 2025-06-16
Supplement: Supplementary file 456 [file 30611.xls]

## Sheet: Sheet1
14.45	109	1575.05	0.00610644		0.19
14.44	205	2960.2	0.0114846		0.18
14.43	232	3347.76	0.0129972		0.17
14.42	383	5522.86	0.0214566		0.16
14.41	214	3083.74	0.0119888		0.15
14.4	706	10166.4	0.0395518		0.14
14.39	223	3208.97	0.012493		0.13
14.38	118	1696.84	0.00661064		0.12
14.37	67	962.79	0.0037535		0.11
14.36	83	1191.88	0.00464986		0.1
14.35	305	4376.75	0.0170868		0.09
14.34	175	2509.5	0.00980392		0.08
14.33	304	4356.32	0.0170308		0.07
14.32	270	3866.4	0.0151261		0.06
14.31	249	3563.19	0.0139496		0.05
14.3	1204	17217.2	0.067451		0.04
14.29	526	7516.54	0.0294678		0.03
14.28	1224	17478.7	0.0685714		0.02
14.27	457	6521.39	0.0256022		0.01
14.26	977	13932	0.0547339		0
14.25	1791	25521.8	0.100336		-0.01
14.24	1322	18825.3	0.0740616		-0.02
14.23	431	6133.13	0.0241457		-0.03
14.22	246	3498.12	0.0137815		-0.04
14.21	555	7886.55	0.0310924		-0.05
14.2	3419	48549.8	0.191541		-0.06
14.19	1755	24903.5	0.0983193		-0.07
14.18	300	4254	0.0168067		-0.08
	17850	14.2648
