# Supplementary material for: Interaction Wave Functions and Interaction-Based Coherence and Entanglement in Complex Adaptive Systems
Source: Research Square preprint supplement (doi:10.21203/rs.3.rs-6846233/v1), 2025-06-16
Supplement: Supplementary file 457 [file 30612.xls]

## Sheet: Sheet1
14.45	47	679.15	0.00272101		0.13
14.44	334	4822.96	0.0193365		0.12
14.43	387	5584.41	0.0224049		0.11
14.42	267	3850.14	0.0154577		0.1
14.41	312	4495.92	0.0180629		0.09
14.4	1681	24206.4	0.0973195		0.08
14.39	1428	20548.9	0.0826724		0.07
14.38	837	12036.1	0.0484571		0.06
14.37	987	14183.2	0.0571412		0.05
14.36	1439	20664	0.0833092		0.04
14.35	994	14263.9	0.0575465		0.03
14.34	860	12332.4	0.0497887		0.02
14.33	604	8655.32	0.0349679		0.01
14.32	256	3665.92	0.0148208		0
14.31	122	1745.82	0.00706305		-0.01
14.3	821	11740.3	0.0475308		-0.02
14.29	161	2300.69	0.00932091		-0.03
14.28	1032	14737	0.0597464		-0.04
14.27	28	399.56	0.00162103		-0.05
14.26	122	1739.72	0.00706305		-0.06
14.25	458	6526.5	0.0265154		-0.07
14.24	636	9056.64	0.0368205		-0.08
14.23	426	6061.98	0.0246628		-0.09
14.22	380	5403.6	0.0219997		-0.1
14.21	408	5797.68	0.0236207		-0.11
14.2	1178	16727.6	0.0681989		-0.12
14.19	484	6867.96	0.0280206		-0.13
14.18	321	4551.78	0.0185839		-0.14
14.17	17	240.89	0.000984195		-0.15
14.16	196	2775.36	0.0113472		-0.16
14.15	50	707.5	0.00289469		-0.17
	17273	14.3212
