# Supplementary material for: Interaction Wave Functions and Interaction-Based Coherence and Entanglement in Complex Adaptive Systems
Source: Research Square preprint supplement (doi:10.21203/rs.3.rs-6846233/v1), 2025-06-16
Supplement: Supplementary file 458 [file 30613.xls]

## Sheet: Sheet1
10.73	10	107.3	0.00130429		0.19
10.72	0	0	0		0.18
10.71	0	0	0		0.17
10.7	0	0	0		0.16
10.69	13	138.97	0.00169558		0.15
10.68	168	1794.24	0.0219121		0.14
10.67	62	661.54	0.0080866		0.13
10.66	10	106.6	0.00130429		0.12
10.65	35	372.75	0.00456502		0.11
10.64	0	0	0		0.1
10.63	377	4007.51	0.0491718		0.09
10.62	332	3525.84	0.0433025		0.08
10.61	430	4562.3	0.0560845		0.07
10.6	607	6434.2	0.0791705		0.06
10.59	255	2700.45	0.0332594		0.05
10.58	276	2920.08	0.0359984		0.04
10.57	479	5063.03	0.0624755		0.03
10.56	148	1562.88	0.0193035		0.02
10.55	653	6889.15	0.0851702		0.01
10.54	414	4363.56	0.0539977		0
10.53	471	4959.63	0.0614321		-0.01
10.52	300	3156	0.0391287		-0.02
10.51	321	3373.71	0.0418677		-0.03
10.5	1083	11371.5	0.141255		-0.04
10.49	94	986.06	0.0122603		-0.05
10.48	141	1477.68	0.0183905		-0.06
10.47	112	1172.64	0.0146081		-0.07
10.46	170	1778.2	0.0221729		-0.08
10.45	225	2351.25	0.0293466		-0.09
10.44	0	0	0		-0.1
10.43	0	0	0		-0.11
10.42	85	885.7	0.0110865		-0.12
10.41	60	624.6	0.00782575		-0.13
10.4	330	3432	0.0430416		-0.14
10.39	6	62.34	0.000782575		-0.15
	7667	10.5441
