# Supplementary material for: Interaction Wave Functions and Interaction-Based Coherence and Entanglement in Complex Adaptive Systems
Source: Research Square preprint supplement (doi:10.21203/rs.3.rs-6846233/v1), 2025-06-16
Supplement: Supplementary file 459 [file 30616-20.xls]

## Sheet: Sheet1
0.22	93					93	20.46	0.00345109
0.21	0					0	0	0
0.2	29					29	5.8	0.00107615
0.19	0					0	0	0
0.18	67					67	12.06	0.00248627
0.17	145					145	24.65	0.00538073
0.16	16					16	2.56	0.000593736
0.15	170					170	25.5	0.00630845
0.14	266		27			293	41.02	0.0108728
0.13	64		0			64	8.32	0.00237494
0.12	373		0			373	44.76	0.0138415
0.11	346		14			360	39.6	0.0133591
0.1	222		93			315	31.5	0.0116892
0.09	0		119			119	10.71	0.00441591
0.08	33	254	55	64	12	418	33.44	0.0155114
0.07	72	150	170	64	259	715	50.05	0.0265326
0.06	64	451	461	199	39	1214	72.84	0.0450497
0.05	76	233	170	80	179	738	36.9	0.0273861
0.04	225	577	274	14	182	1272	50.88	0.047202
0.03	187	92	341	271	194	1085	32.55	0.0402627
0.02	316	229	155	874	961	2535	50.7	0.0940701
0.01	8	273	422	589	746	2038	20.38	0.0756271
-5.89806e-17	102	598	102	1452	603	2857	-1.68508e-13	0.106019
-0.01	121	292	110	662	302	1487	-14.87	0.0551803
-0.02	317	0	109	249	390	1065	-21.3	0.0395206
-0.03	413	33	738	139	456	1779	-53.37	0.066016
-0.04	115	28	1807	0	479	2429	-97.16	0.0901366
-0.05	100	335	222	15	176	848	-42.4	0.031468
-0.06	84	939		0	125	1148	-68.88	0.0426006
-0.07	291	0		0	0	291	-20.37	0.0107986
-0.08	455	38		0	323	816	-65.28	0.0302805
-0.09	299			0		299	-26.91	0.0110954
-0.1	598			500		1098	-109.8	0.0407451
-0.11	63					63	-6.93	0.00233784
-0.12	190					190	-22.8	0.00705062
-0.13	519					519	-67.47	0.0192593
						26948	-0.00010613
