# Supplementary material for: Interaction Wave Functions and Interaction-Based Coherence and Entanglement in Complex Adaptive Systems
Source: Research Square preprint supplement (doi:10.21203/rs.3.rs-6846233/v1), 2025-06-16
Supplement: Supplementary file 460 [file 30616.xls]

## Sheet: Sheet1
10.5	93	976.5	0.0144432		0.22
10.49	0	0	0		0.21
10.48	29	303.92	0.0045038		0.2
10.47	0	0	0		0.19
10.46	67	700.82	0.0104053		0.18
10.45	145	1515.25	0.022519		0.17
10.44	16	167.04	0.00248486		0.16
10.43	170	1773.1	0.0264016		0.15
10.42	266	2771.72	0.0413108		0.14
10.41	64	666.24	0.00993943		0.13
10.4	373	3879.2	0.0579282		0.12
10.39	346	3594.94	0.0537351		0.11
10.38	222	2304.36	0.0344774		0.1
10.37	0	0	0		0.09
10.36	33	341.88	0.00512502		0.08
10.35	72	745.2	0.0111819		0.07
10.34	64	661.76	0.00993943		0.06
10.33	76	785.08	0.0118031		0.05
10.32	225	2322	0.0349433		0.04
10.31	187	1927.97	0.0290418		0.03
10.3	316	3254.8	0.0490759		0.02
10.29	8	82.32	0.00124243		0.01
10.28	102	1048.56	0.015841		0
10.27	121	1242.67	0.0187917		-0.01
10.26	317	3252.42	0.0492312		-0.02
10.25	413	4233.25	0.0641404		-0.03
10.24	115	1177.6	0.0178599		-0.04
10.23	100	1023	0.0155304		-0.05
10.22	84	858.48	0.0130455		-0.06
10.21	291	2971.11	0.0451934		-0.07
10.2	455	4641	0.0706631		-0.08
10.19	299	3046.81	0.0464358		-0.09
10.18	598	6087.64	0.0928716		-0.1
10.17	63	640.71	0.00978413		-0.11
10.16	190	1930.4	0.0295077		-0.12
10.15	519	5267.85	0.0806026		-0.13
	6439	10.2804
