# Supplementary material for: Interaction Wave Functions and Interaction-Based Coherence and Entanglement in Complex Adaptive Systems
Source: Research Square preprint supplement (doi:10.21203/rs.3.rs-6846233/v1), 2025-06-16
Supplement: Supplementary file 461 [file 30617.xls]

## Sheet: Sheet1
10.24	254	2600.96	0.0561698		0.08
10.23	150	1534.5	0.0331712		0.07
10.22	451	4609.22	0.0997346		0.06
10.21	233	2378.93	0.0515259		0.05
10.2	577	5885.4	0.127598		0.04
10.19	92	937.48	0.020345		0.03
10.18	229	2331.22	0.0506413		0.02
10.17	273	2776.41	0.0603715		0.01
10.16	598	6075.68	0.132242		0
10.15	292	2963.8	0.0645732		-0.01
10.14	0	0	0		-0.02
10.13	33	334.29	0.00729766		-0.03
10.12	28	283.36	0.00619195		-0.04
10.11	335	3386.85	0.0740823		-0.05
10.1	939	9483.9	0.207651		-0.06
10.09	0	0	0		-0.07
10.08	38	383.04	0.00840336		-0.08
	4522	10.1648
