# Supplementary material for: Interaction Wave Functions and Interaction-Based Coherence and Entanglement in Complex Adaptive Systems
Source: Research Square preprint supplement (doi:10.21203/rs.3.rs-6846233/v1), 2025-06-16
Supplement: Supplementary file 462 [file 30618.xls]

## Sheet: Sheet1
10.18	27	274.86	0.00501021		0.14
10.17	0	0	0		0.13
10.16	0	0	0		0.12
10.15	14	142.1	0.00259788		0.11
10.14	93	943.02	0.0172574		0.1
10.13	119	1205.47	0.022082		0.09
10.12	55	556.6	0.010206		0.08
10.11	170	1718.7	0.0315457		0.07
10.1	461	4656.1	0.0855446		0.06
10.09	170	1715.3	0.0315457		0.05
10.08	274	2761.92	0.0508443		0.04
10.07	341	3433.87	0.063277		0.03
10.06	155	1559.3	0.0287623		0.02
10.05	422	4241.1	0.0783077		0.01
10.04	102	1024.08	0.0189274		0
10.03	110	1103.3	0.020412		-0.01
10.02	109	1092.18	0.0202264		-0.02
10.01	738	7387.38	0.136946		-0.03
10	1807	18070	0.335313		-0.04
9.99	222	2217.78	0.041195		-0.05
	5389	10.0395
