# Supplementary material for: Interaction Wave Functions and Interaction-Based Coherence and Entanglement in Complex Adaptive Systems
Source: Research Square preprint supplement (doi:10.21203/rs.3.rs-6846233/v1), 2025-06-16
Supplement: Supplementary file 463 [file 30619.xls]

## Sheet: Sheet1
10.08	64	645.12	0.0123743		0.08
10.07	64	644.48	0.0123743		0.07
10.06	199	2001.94	0.0384764		0.06
10.05	80	804	0.0154679		0.05
10.04	14	140.56	0.00270688		0.04
10.03	271	2718.13	0.0523975		0.03
10.02	874	8757.48	0.168987		0.02
10.01	589	5895.89	0.113882		0.01
10	1452	14520	0.280742		0
9.99	662	6613.38	0.127997		-0.01
9.98	249	2485.02	0.0481439		-0.02
9.97	139	1385.83	0.0268755		-0.03
9.96	0	0	0		-0.04
9.95	15	149.25	0.00290023		-0.05
9.94	0	0	0		-0.06
9.93	0	0	0		-0.07
9.92	0	0	0		-0.08
9.91	0	0	0		-0.09
9.9	500	4950	0.0966744		-0.1
	5172	9.99828
