# Supplementary material for: Interaction Wave Functions and Interaction-Based Coherence and Entanglement in Complex Adaptive Systems
Source: Research Square preprint supplement (doi:10.21203/rs.3.rs-6846233/v1), 2025-06-16
Supplement: Supplementary file 464 [file 30620.xls]

## Sheet: Sheet1
10.06	12	120.72	0.00221157		0.08
10.05	259	2602.95	0.0477331		0.07
10.04	39	391.56	0.00718762		0.06
10.03	179	1795.37	0.0329893		0.05
10.02	182	1823.64	0.0335422		0.04
10.01	194	1941.94	0.0357538		0.03
10	961	9610	0.17711		0.02
9.99	746	7452.54	0.137486		0.01
9.98	603	6017.94	0.111132		0
9.97	302	3010.94	0.0556579		-0.01
9.96	390	3884.4	0.0718762		-0.02
9.95	456	4537.2	0.0840398		-0.03
9.94	479	4761.26	0.0882787		-0.04
9.93	176	1747.68	0.0324364		-0.05
9.92	125	1240	0.0230372		-0.06
9.91	0	0	0		-0.07
9.9	323	3197.7	0.0595282		-0.08
	5426	9.97712
