# Supplementary material for: Interaction Wave Functions and Interaction-Based Coherence and Entanglement in Complex Adaptive Systems
Source: Research Square preprint supplement (doi:10.21203/rs.3.rs-6846233/v1), 2025-06-16
Supplement: Supplementary file 465 [file 30623-27.xls]

## Sheet: Sheet1
0.12			186			186		0.0086375
0.11			42		13	55		0.0025541
0.1	10		7	297	70	384		0.0178323
0.09	19		0	312	70	401		0.0186217
0.08	61		0	736	89	886		0.0411442
0.07	10		205	1018	5	1238		0.0574905
0.06	21	5	108	860	103	1097		0.0509427
0.05	151	0	134	581	23	889		0.0412836
0.04	83	50	56	449	81	719		0.0333891
0.03	121	287	0	1006	86	1500		0.0696573
0.02	372	173	191	283	206	1225		0.0568868
0.01	156	800	44	546	431	1977		0.0918083
0	383	489	35	563	348	1818		0.0844246
-0.01	251	281	102	420	258	1312		0.0609269
-0.02	99	389	52	484	110	1134		0.0526609
-0.03	138	130	196	344	209	1017		0.0472276
-0.04	288	8	238	325	564	1423		0.0660815
-0.05	340		174	210	64	788		0.0365933
-0.06			10	593	0	603		0.0280022
-0.07			14	1299	5	1318		0.0612055
-0.08			62	200		262		0.0121668
-0.09			104	195		299		0.013885
-0.1			39	223		262		0.0121668
-0.11			35	200		235		0.010913
-0.12			6	254		260		0.0120739
-0.13			24	15		39		0.00181109
-0.14			0	128		128		0.00594409
-0.15			0	0		0		0
-0.16			0	39		39		0.00181109
-0.17			6			6		0.000278629
-0.18			34			34		0.0015789
						21534
