# Supplementary material for: Interaction Wave Functions and Interaction-Based Coherence and Entanglement in Complex Adaptive Systems
Source: Research Square preprint supplement (doi:10.21203/rs.3.rs-6846233/v1), 2025-06-16
Supplement: Supplementary file 466 [file 30623.xls]

## Sheet: Sheet1
10.05	10	100.5	0.00399521		0.1
10.04	19	190.76	0.00759089		0.09
10.03	61	611.83	0.0243708		0.08
10.02	10	100.2	0.00399521		0.07
10.01	21	210.21	0.00838993		0.06
10	151	1510	0.0603276		0.05
9.99	83	829.17	0.0331602		0.04
9.98	121	1207.58	0.048342		0.03
9.97	372	3708.84	0.148622		0.02
9.96	156	1553.76	0.0623252		0.01
9.95	383	3810.85	0.153016		0
9.94	251	2494.94	0.10028		-0.01
9.93	99	983.07	0.0395525		-0.02
9.92	138	1368.96	0.0551338		-0.03
9.91	288	2854.08	0.115062		-0.04
9.9	340	3366	0.135837		-0.05
	2503	9.94836
