# Supplementary material for: Interaction Wave Functions and Interaction-Based Coherence and Entanglement in Complex Adaptive Systems
Source: Research Square preprint supplement (doi:10.21203/rs.3.rs-6846233/v1), 2025-06-16
Supplement: Supplementary file 467 [file 30624.xls]

## Sheet: Sheet1
10.03	5	50.15	0.00191424		0.06
10.02	0	0	0		0.05
10.01	50	500.5	0.0191424		0.04
10	287	2870	0.109877		0.03
9.99	173	1728.27	0.0662328		0.02
9.98	800	7984	0.306279		0.01
9.97	489	4875.33	0.187213		0
9.96	281	2798.76	0.10758		-0.01
9.95	389	3870.55	0.148928		-0.02
9.94	130	1292.2	0.0497703		-0.03
9.93	8	79.44	0.00306279		-0.04
	2612	9.97289
