# Supplementary material for: Interaction Wave Functions and Interaction-Based Coherence and Entanglement in Complex Adaptive Systems
Source: Research Square preprint supplement (doi:10.21203/rs.3.rs-6846233/v1), 2025-06-16
Supplement: Supplementary file 468 [file 30625.xls]

## Sheet: Sheet1
10.15	186	1887.9	0.088403		0.12
10.14	42	425.88	0.019962		0.11
10.13	7	70.91	0.003327		0.1
10.12	0	0	0		0.09
10.11	0	0	0		0.08
10.1	205	2070.5	0.0974335		0.07
10.09	108	1089.72	0.0513308		0.06
10.08	134	1350.72	0.0636882		0.05
10.07	56	563.92	0.026616		0.04
10.06	0	0	0		0.03
10.05	191	1919.55	0.0907795		0.02
10.04	44	441.76	0.0209125		0.01
10.03	35	351.05	0.016635		0
10.02	102	1022.04	0.0484791		-0.01
10.01	52	520.52	0.0247148		-0.02
10	196	1960	0.0931559		-0.03
9.99	238	2377.62	0.113118		-0.04
9.98	174	1736.52	0.0826996		-0.05
9.97	10	99.7	0.00475285		-0.06
9.96	14	139.44	0.00665399		-0.07
9.95	62	616.9	0.0294677		-0.08
9.94	104	1033.76	0.0494297		-0.09
9.93	39	387.27	0.0185361		-0.1
9.92	35	347.2	0.016635		-0.11
9.91	6	59.46	0.00285171		-0.12
9.9	24	237.6	0.0114068		-0.13
9.89	0	0	0		-0.14
9.88	0	0	0		-0.15
9.87	0	0	0		-0.16
9.86	6	59.16	0.00285171		-0.17
9.85	34	334.9	0.0161597		-0.18
	2104	10.0304
