# Supplementary material for: Interaction Wave Functions and Interaction-Based Coherence and Entanglement in Complex Adaptive Systems
Source: Research Square preprint supplement (doi:10.21203/rs.3.rs-6846233/v1), 2025-06-16
Supplement: Supplementary file 469 [file 30626.xls]

## Sheet: Sheet1
10.17	297	3020.49	0.0256477		0.1
10.16	312	3169.92	0.026943		0.09
10.15	736	7470.4	0.0635579		0.08
10.14	1018	10322.5	0.0879102		0.07
10.13	860	8711.8	0.074266		0.06
10.12	581	5879.72	0.0501727		0.05
10.11	449	4539.39	0.0387737		0.04
10.1	1006	10160.6	0.0868739		0.03
10.09	283	2855.47	0.0244387		0.02
10.08	546	5503.68	0.0471503		0.01
10.07	563	5669.41	0.0486183		0
10.06	420	4225.2	0.0362694		-0.01
10.05	484	4864.2	0.0417962		-0.02
10.04	344	3453.76	0.0297064		-0.03
10.03	325	3259.75	0.0280656		-0.04
10.02	210	2104.2	0.0181347		-0.05
10.01	593	5935.93	0.051209		-0.06
10	1299	12990	0.112176		-0.07
9.99	200	1998	0.0172712		-0.08
9.98	195	1946.1	0.0168394		-0.09
9.97	223	2223.31	0.0192573		-0.1
9.96	200	1992	0.0172712		-0.11
9.95	254	2527.3	0.0219344		-0.12
9.94	15	149.1	0.00129534		-0.13
9.93	128	1271.04	0.0110535		-0.14
9.92	0	0	0		-0.15
9.91	39	386.49	0.00336788		-0.16
	11580	10.0717
