# Supplementary material for: Interaction Wave Functions and Interaction-Based Coherence and Entanglement in Complex Adaptive Systems
Source: Research Square preprint supplement (doi:10.21203/rs.3.rs-6846233/v1), 2025-06-16
Supplement: Supplementary file 470 [file 30627.xls]

## Sheet: Sheet1
10.15	13	131.95	0.0047532		0.11
10.14	70	709.8	0.0255941		0.1
10.13	70	709.1	0.0255941		0.09
10.12	89	900.68	0.0325411		0.08
10.11	5	50.55	0.00182815		0.07
10.1	103	1040.3	0.03766		0.06
10.09	23	232.07	0.00840951		0.05
10.08	81	816.48	0.0296161		0.04
10.07	86	866.02	0.0314442		0.03
10.06	206	2072.36	0.0753199		0.02
10.05	431	4331.55	0.157587		0.01
10.04	348	3493.92	0.127239		0
10.03	258	2587.74	0.0943327		-0.01
10.02	110	1102.2	0.0402194		-0.02
10.01	209	2092.09	0.0764168		-0.03
10	564	5640	0.206216		-0.04
9.99	64	639.36	0.0234004		-0.05
9.98	0	0	0		-0.06
9.97	5	49.85	0.00182815		-0.07
	2735	10.0424
