# Supplementary material for: Interaction Wave Functions and Interaction-Based Coherence and Entanglement in Complex Adaptive Systems
Source: Research Square preprint supplement (doi:10.21203/rs.3.rs-6846233/v1), 2025-06-16
Supplement: Supplementary file 471 [file 30602-06.xls]

## Sheet: Sheet1
0.25		6				6	1.5	5.02715e-05
0.24		39				39	9.36	0.000326765
0.23		0				0	0	0
0.22		331				331	72.82	0.00277331
0.21		0				0	0	0
0.2		0				0	0	0
0.19		9				9	1.71	7.54072e-05
0.18		26				26	4.68	0.000217843
0.17		141				141	23.97	0.00118138
0.16		29				29	4.64	0.000242979
0.15		0				0	0	0
0.14		10				10	1.4	8.37858e-05
0.13	742	43	43			828	107.64	0.00693746
0.12	975	423	549			1947	233.64	0.0163131
0.11	315	404	70	30	128	947	104.17	0.00793451
0.1	566	659	312	0	42	1579	157.9	0.0132298
0.09	920	196	111	187	198	1612	145.08	0.0135063
0.08	3452	1047	1879	405	257	7040	563.2	0.0589852
0.07	725	1533	1100	447	456	4261	298.27	0.0357011
0.06	1267	187	946	671	594	3665	219.9	0.0307075
0.05	1119	4200	935	1434	766	8454	422.7	0.0708325
0.04	1442	868	1381	723	1411	5825	233	0.0488052
0.03	2113	819	5486	1527	1226	11171	335.13	0.0935971
0.02	482	2276	1332	299	978	5367	107.34	0.0449678
0.01	1578	1051	1826	733	2029	7217	72.17	0.0604682
-8.67362e-17	644	1594	316	1315	523	4392	-3.80945e-13	0.0367987
-0.01	539	1460	485	916	800	4200	-42	0.03519
-0.02	1711	1440	894	424	1461	5930	-118.6	0.049685
-0.03	335	1451	1034	874	2166	5860	-175.8	0.0490985
-0.04	679	138	613	80	2990	4500	-180	0.0377036
-0.05	1007	589	430	1102	609	3737	-186.85	0.0313107
-0.06	2007	130	2076	796	91	5100	-306	0.0427307
-0.07	3124	2411	1478	1033		8046	-563.22	0.067414
-0.08	652	4215	939	928		6734	-538.72	0.0564213
-0.09	2012	608	2239	364		5223	-470.07	0.0437613
-0.1	1423	200	1061			2684	-268.4	0.0224881
-0.11	198	0	573			771	-84.81	0.00645988
-0.12	944	120	459			1523	-182.76	0.0127606
-0.13	56					56	-7.28	0.0004692
-0.14	92					92	-12.88	0.000770829
						119352	-0.00014386
