# Supplementary material for: Interaction Wave Functions and Interaction-Based Coherence and Entanglement in Complex Adaptive Systems
Source: Research Square preprint supplement (doi:10.21203/rs.3.rs-6846233/v1), 2025-06-16
Supplement: Supplementary file 472 [file 30602.xls]

## Sheet: Sheet1
8.75	742	6492.5	0.023844		0.13
8.74	975	8521.5	0.0313313		0.12
8.73	315	2749.95	0.0101224		0.11
8.72	566	4935.52	0.0181882		0.1
8.71	920	8013.2	0.0295639		0.09
8.7	3452	30032.4	0.110929		0.08
8.69	725	6300.25	0.0232977		0.07
8.68	1267	10997.6	0.0407147		0.06
8.67	1119	9701.73	0.0359587		0.05
8.66	1442	12487.7	0.0463382		0.04
8.65	2113	18277.5	0.0679006		0.03
8.64	482	4164.48	0.0154889		0.02
8.63	1578	13618.1	0.0507086		0.01
8.62	644	5551.28	0.0206948		0
8.61	539	4640.79	0.0173206		-0.01
8.6	1711	14714.6	0.0549825		-0.02
8.59	335	2877.65	0.0107651		-0.03
8.58	679	5825.82	0.0218195		-0.04
8.57	1007	8629.99	0.0323597		-0.05
8.56	2007	17179.9	0.0644944		-0.06
8.55	3124	26710.2	0.100389		-0.07
8.54	652	5568.08	0.0209518		-0.08
8.53	2012	17162.4	0.064655		-0.09
8.52	1423	12124	0.0457277		-0.1
8.51	198	1684.98	0.00636267		-0.11
8.5	944	8024	0.0303352		-0.12
8.49	56	475.44	0.00179954		-0.13
8.48	92	780.16	0.00295639		-0.14
	31119	8.61987
