# Supplementary material for: Interaction Wave Functions and Interaction-Based Coherence and Entanglement in Complex Adaptive Systems
Source: Research Square preprint supplement (doi:10.21203/rs.3.rs-6846233/v1), 2025-06-16
Supplement: Supplementary file 473 [file 30603.xls]

## Sheet: Sheet1
8.63	6	51.78	0.000209402		0.25
8.62	39	336.18	0.00136111		0.24
8.61	0	0	0		0.23
8.6	331	2846.6	0.011552		0.22
8.59	0	0	0		0.21
8.58	0	0	0		0.2
8.57	9	77.13	0.000314103		0.19
8.56	26	222.56	0.000907409		0.18
8.55	141	1205.55	0.00492095		0.17
8.54	29	247.66	0.00101211		0.16
8.53	0	0	0		0.15
8.52	10	85.2	0.000349004		0.14
8.51	43	365.93	0.00150072		0.13
8.5	423	3595.5	0.0147629		0.12
8.49	404	3429.96	0.0140997		0.11
8.48	659	5588.32	0.0229993		0.1
8.47	196	1660.12	0.00684047		0.09
8.46	1047	8857.62	0.0365407		0.08
8.45	1533	12953.9	0.0535023		0.07
8.44	187	1578.28	0.00652637		0.06
8.43	4200	35406	0.146582		0.05
8.42	868	7308.56	0.0302935		0.04
8.41	819	6887.79	0.0285834		0.03
8.4	2276	19118.4	0.0794332		0.02
8.39	1051	8817.89	0.0366803		0.01
8.38	1594	13357.7	0.0556312		0
8.37	1460	12220.2	0.0509545		-0.01
8.36	1440	12038.4	0.0502565		-0.02
8.35	1451	12115.9	0.0506404		-0.03
8.34	138	1150.92	0.00481625		-0.04
8.33	589	4906.37	0.0205563		-0.05
8.32	130	1081.6	0.00453705		-0.06
8.31	2411	20035.4	0.0841448		-0.07
8.3	4215	34984.5	0.147105		-0.08
8.29	608	5040.32	0.0212194		-0.09
8.28	200	1656	0.00698007		-0.1
8.27	0	0	0		-0.11
8.26	120	991.2	0.00418804		-0.12
	28653	8.38374
