# Supplementary material for: Interaction Wave Functions and Interaction-Based Coherence and Entanglement in Complex Adaptive Systems
Source: Research Square preprint supplement (doi:10.21203/rs.3.rs-6846233/v1), 2025-06-16
Supplement: Supplementary file 474 [file 30604.xls]

## Sheet: Sheet1
8.4	43	361.2	0.00150523		0.13
8.39	549	4606.11	0.019218		0.12
8.38	70	586.6	0.00245038		0.11
8.37	312	2611.44	0.0109217		0.1
8.36	111	927.96	0.0038856		0.09
8.35	1879	15689.7	0.0657752		0.08
8.34	1100	9174	0.038506		0.07
8.33	946	7880.18	0.0331151		0.06
8.32	935	7779.2	0.0327301		0.05
8.31	1381	11476.1	0.0483425		0.04
8.3	5486	45533.8	0.19204		0.03
8.29	1332	11042.3	0.0466272		0.02
8.28	1826	15119.3	0.0639199		0.01
8.27	316	2613.32	0.0110617		0
8.26	485	4006.1	0.0169776		-0.01
8.25	894	7375.5	0.0312949		-0.02
8.24	1034	8520.16	0.0361956		-0.03
8.23	613	5044.99	0.0214583		-0.04
8.22	430	3534.6	0.0150523		-0.05
8.21	2076	17044	0.0726713		-0.06
8.2	1478	12119.6	0.051738		-0.07
8.19	939	7690.41	0.0328701		-0.08
8.18	2239	18315	0.0783771		-0.09
8.17	1061	8668.37	0.0371408		-0.1
8.16	573	4675.68	0.0200581		-0.11
8.15	459	3740.85	0.0160675		-0.12
	28567	8.26605
