# Supplementary material for: Interaction Wave Functions and Interaction-Based Coherence and Entanglement in Complex Adaptive Systems
Source: Research Square preprint supplement (doi:10.21203/rs.3.rs-6846233/v1), 2025-06-16
Supplement: Supplementary file 475 [file 30605.xls]

## Sheet: Sheet1
8.36	30	250.8	0.00209966		0.11
8.35	0	0	0		0.1
8.34	187	1559.58	0.0130879		0.09
8.33	405	3373.65	0.0283455		0.08
8.32	447	3719.04	0.031285		0.07
8.31	671	5576.01	0.0469625		0.06
8.3	1434	11902.2	0.100364		0.05
8.29	723	5993.67	0.0506019		0.04
8.28	1527	12643.6	0.106873		0.03
8.27	299	2472.73	0.0209267		0.02
8.26	733	6054.58	0.0513018		0.01
8.25	1315	10848.8	0.0920353		0
8.24	916	7547.84	0.0641097		-0.01
8.23	424	3489.52	0.0296753		-0.02
8.22	874	7184.28	0.0611702		-0.03
8.21	80	656.8	0.0055991		-0.04
8.2	1102	9036.4	0.0771277		-0.05
8.19	796	6519.24	0.0557111		-0.06
8.18	1033	8449.94	0.0722984		-0.07
8.17	928	7581.76	0.0649496		-0.08
8.16	364	2970.24	0.0254759		-0.09
	14288	8.24682
