# Supplementary material for: Interaction Wave Functions and Interaction-Based Coherence and Entanglement in Complex Adaptive Systems
Source: Research Square preprint supplement (doi:10.21203/rs.3.rs-6846233/v1), 2025-06-16
Supplement: Supplementary file 476 [file 30606.xls]

## Sheet: Sheet1
8.25	128	1056	0.00765321		0.11
8.24	42	346.08	0.00251121		0.1
8.23	198	1629.54	0.0118386		0.09
8.22	257	2112.54	0.0153662		0.08
8.21	456	3743.76	0.0272646		0.07
8.2	594	4870.8	0.0355157		0.06
8.19	766	6273.54	0.0457997		0.05
8.18	1411	11542	0.0843647		0.04
8.17	1226	10016.4	0.0733034		0.03
8.16	978	7980.48	0.0584753		0.02
8.15	2029	16536.4	0.121315		0.01
8.14	523	4257.22	0.0312706		0
8.13	800	6504	0.0478326		-0.01
8.12	1461	11863.3	0.0873543		-0.02
8.11	2166	17566.3	0.129507		-0.03
8.1	2990	24219	0.178774		-0.04
8.09	609	4926.81	0.0364126		-0.05
8.08	91	735.28	0.00544096		-0.06
	16725	8.14226
