# Supplementary material for: Interaction Wave Functions and Interaction-Based Coherence and Entanglement in Complex Adaptive Systems
Source: Research Square preprint supplement (doi:10.21203/rs.3.rs-6846233/v1), 2025-06-16
Supplement: Supplementary file 477 [file 30609-13.xls]

## Sheet: Sheet1
0.11				15		15	1.65	0.000309981
0.1	77			0		77	7.7	0.00159124
0.09	284			129		413	37.17	0.00853482
0.08	273			38		311	24.88	0.00642695
0.07	573	95		37		705	49.35	0.0145691
0.06	175	89	193	24		481	28.86	0.00994007
0.05	401	117	565	301	7	1391	69.55	0.0287456
0.04	338	266	789	580	174	2147	85.88	0.0443687
0.03	371	339	1736	97	1108	3651	109.53	0.0754495
0.02	1293	1165	1305	230	657	4650	93	0.0960942
0.01	1381	346	1961	819	690	5197	51.97	0.107398
0	1138	707	1136	1754	725	5460	0	0.112833
-0.01	4475	857	393	3039	1245	10009	-100.09	0.20684
-0.02	823	1108	682	1348	1631	5592	-111.84	0.115561
-0.03	1214	1436	146	1184	762	4742	-142.26	0.0979955
-0.04	378	64	1034		527	2003	-80.12	0.0413928
-0.05	205	35	347		89	676	-33.8	0.0139698
-0.06	154	27	105			286	-17.16	0.00591031
-0.07			181			181	-12.67	0.00374044
-0.08			250			250	-20	0.00516636
-0.09			153			153	-13.77	0.00316181
						48390	0.000575119
