# Supplementary material for: Interaction Wave Functions and Interaction-Based Coherence and Entanglement in Complex Adaptive Systems
Source: Research Square preprint supplement (doi:10.21203/rs.3.rs-6846233/v1), 2025-06-16
Supplement: Supplementary file 478 [file 30609.xls]

## Sheet: Sheet1
8.11	77	624.47	0.0056814		0.1
8.1	284	2300.4	0.0209548		0.09
8.09	273	2208.57	0.0201431		0.08
8.08	573	4629.84	0.0422785		0.07
8.07	175	1412.25	0.0129123		0.06
8.06	401	3232.06	0.0295875		0.05
8.05	338	2720.9	0.0249391		0.04
8.04	371	2982.84	0.027374		0.03
8.03	1293	10382.8	0.0954032		0.02
8.02	1381	11075.6	0.101896		0.01
8.01	1138	9115.38	0.0839666		0
8	4475	35800	0.330185		-0.01
7.99	823	6575.77	0.0607246		-0.02
7.98	1214	9687.72	0.0895743		-0.03
7.97	378	3012.66	0.0278905		-0.04
7.96	205	1631.8	0.0151258		-0.05
7.95	154	1224.3	0.0113628		-0.06
	13553	8.01427
