# Supplementary material for: Interaction Wave Functions and Interaction-Based Coherence and Entanglement in Complex Adaptive Systems
Source: Research Square preprint supplement (doi:10.21203/rs.3.rs-6846233/v1), 2025-06-16
Supplement: Supplementary file 479 [file 30610.xls]

## Sheet: Sheet1
8.1	95	769.5	0.0142836		0.07
8.09	89	720.01	0.0133814		0.06
8.08	117	945.36	0.0175913		0.05
8.07	266	2146.62	0.039994		0.04
8.06	339	2732.34	0.0509698		0.03
8.05	1165	9378.25	0.175162		0.02
8.04	346	2781.84	0.0520223		0.01
8.03	707	5677.21	0.1063		0
8.02	857	6873.14	0.128853		-0.01
8.01	1108	8875.08	0.166591		-0.02
8	1436	11488	0.215907		-0.03
7.99	64	511.36	0.00962261		-0.04
7.98	35	279.3	0.00526237		-0.05
7.97	27	215.19	0.00405954		-0.06
	6651	8.02785
