# Supplementary material for: Interaction Wave Functions and Interaction-Based Coherence and Entanglement in Complex Adaptive Systems
Source: Research Square preprint supplement (doi:10.21203/rs.3.rs-6846233/v1), 2025-06-16
Supplement: Supplementary file 480 [file 30611.xls]

## Sheet: Sheet1
8.23	193	1588.39	0.0175838		0.06
8.22	565	4644.3	0.0514759		0.05
8.21	789	6477.69	0.0718841		0.04
8.2	1736	14235.2	0.158163		0.03
8.19	1305	10688	0.118896		0.02
8.18	1961	16041	0.178663		0.01
8.17	1136	9281.12	0.103499		0
8.16	393	3206.88	0.0358054		-0.01
8.15	682	5558.3	0.0621356		-0.02
8.14	146	1188.44	0.0133017		-0.03
8.13	1034	8406.42	0.0942055		-0.04
8.12	347	2817.64	0.0316144		-0.05
8.11	105	851.55	0.00956633		-0.06
8.1	181	1466.1	0.0164905		-0.07
8.09	250	2022.5	0.022777		-0.08
8.08	153	1236.24	0.0139395		-0.09
	10976	8.17326
