# Supplementary material for: Interaction Wave Functions and Interaction-Based Coherence and Entanglement in Complex Adaptive Systems
Source: Research Square preprint supplement (doi:10.21203/rs.3.rs-6846233/v1), 2025-06-16
Supplement: Supplementary file 481 [file 30612.xls]

## Sheet: Sheet1
8.22	15	123.3	0.00156331		0.11
8.21	0	0	0		0.1
8.2	129	1057.8	0.0134445		0.09
8.19	38	311.22	0.0039604		0.08
8.18	37	302.66	0.00385618		0.07
8.17	24	196.08	0.0025013		0.06
8.16	301	2456.16	0.0313705		0.05
8.15	580	4727	0.0604482		0.04
8.14	97	789.58	0.0101094		0.03
8.13	230	1869.9	0.0239708		0.02
8.12	819	6650.28	0.085357		0.01
8.11	1754	14224.9	0.182804		0
8.1	3039	24615.9	0.316727		-0.01
8.09	1348	10905.3	0.14049		-0.02
8.08	1184	9566.72	0.123398		-0.03
	9595	8.10806
