# Supplementary material for: Interaction Wave Functions and Interaction-Based Coherence and Entanglement in Complex Adaptive Systems
Source: Research Square preprint supplement (doi:10.21203/rs.3.rs-6846233/v1), 2025-06-16
Supplement: Supplementary file 482 [file 30613.xls]

## Sheet: Sheet1
8.22	7	57.54	0.000919238		0.05
8.21	174	1428.54	0.0228496		0.04
8.2	1108	9085.6	0.145502		0.03
8.19	657	5380.83	0.0862771		0.02
8.18	690	5644.2	0.0906106		0.01
8.17	725	5923.25	0.0952068		0
8.16	1245	10159.2	0.163493		-0.01
8.15	1631	13292.7	0.214183		-0.02
8.14	762	6202.68	0.100066		-0.03
8.13	527	4284.51	0.0692055		-0.04
8.12	89	722.68	0.0116875		-0.05
	7615	8.16568
