# Supplementary material for: Interaction Wave Functions and Interaction-Based Coherence and Entanglement in Complex Adaptive Systems
Source: Research Square preprint supplement (doi:10.21203/rs.3.rs-6846233/v1), 2025-06-16
Supplement: Supplementary file 483 [file 30616-20.xls]

## Sheet: Sheet1
0.12			79			79	9.48	0.00148984
0.11			30			30	3.3	0.00056576
0.1			147	81		228	22.8	0.00429978
0.09			407	1043		1450	130.5	0.0273451
0.08			151	297		448	35.84	0.00844869
0.07	121		621	554	10	1306	91.42	0.0246294
0.06	111		325	290	353	1079	64.74	0.0203485
0.05	34	554	735	874	589	2786	139.3	0.0525403
0.04	559	1253	583	96	437	2928	117.12	0.0552182
0.03	221	1121	1100	355	382	3179	95.37	0.0599517
0.02	1150	744	666	130	1710	4400	88	0.0829782
0.01	507	684	417	120	425	2153	21.53	0.0406027
0	456	228	1019	297	913	2913	0	0.0549353
-0.01	531	311	1011	951	379	3183	-31.83	0.0600272
-0.02	1265	143	1817	1034	385	4644	-92.88	0.0875797
-0.03	1941	366	2541	1753	1259	7860	-235.8	0.148229
-0.04	137	262	773	1446	203	2821	-112.84	0.0532003
-0.05		145	900	1993	141	3179	-158.95	0.0599517
-0.06		680	897	2954	300	4831	-289.86	0.0911062
-0.07		69	223	825	531	1648	-115.36	0.0310791
-0.08		251		161	157	569	-45.52	0.0107306
-0.09		62		800		862	-77.58	0.0162562
-0.1		0				0	0	0
-0.11		0				0	0	0
-0.12		450				450	-54	0.0084864
						53026	-0.00745332
