# Supplementary material for: Interaction Wave Functions and Interaction-Based Coherence and Entanglement in Complex Adaptive Systems
Source: Research Square preprint supplement (doi:10.21203/rs.3.rs-6846233/v1), 2025-06-16
Supplement: Supplementary file 484 [file 30616.xls]

## Sheet: Sheet1
8.15	121	986.15	0.0172046		0.07
8.14	111	903.54	0.0157827		0.06
8.13	34	276.42	0.00483435		0.05
8.12	559	4539.08	0.0794824		0.04
8.11	221	1792.31	0.0314233		0.03
8.1	1150	9315	0.163515		0.02
8.09	507	4101.63	0.0720887		0.01
8.08	456	3684.48	0.0648372		0
8.07	531	4285.17	0.0755012		-0.01
8.06	1265	10195.9	0.179866		-0.02
8.05	1941	15625.1	0.275985		-0.03
8.04	137	1101.48	0.0194796		-0.04
	7033	8.0771
