# Supplementary material for: Interaction Wave Functions and Interaction-Based Coherence and Entanglement in Complex Adaptive Systems
Source: Research Square preprint supplement (doi:10.21203/rs.3.rs-6846233/v1), 2025-06-16
Supplement: Supplementary file 485 [file 30617.xls]

## Sheet: Sheet1
8.21	554	4548.34	0.0756521		0.05
8.2	1253	10274.6	0.171105		0.04
8.19	1121	9180.99	0.153079		0.03
8.18	744	6085.92	0.101598		0.02
8.17	684	5588.28	0.0934043		0.01
8.16	228	1860.48	0.0311348		0
8.15	311	2534.65	0.0424689		-0.01
8.14	143	1164.02	0.0195275		-0.02
8.13	366	2975.58	0.0499795		-0.03
8.12	262	2127.44	0.0357777		-0.04
8.11	145	1175.95	0.0198006		-0.05
8.1	680	5508	0.0928581		-0.06
8.09	69	558.21	0.00942237		-0.07
8.08	251	2028.08	0.0342756		-0.08
8.07	62	500.34	0.00846648		-0.09
8.06	0	0	0		-0.1
8.05	0	0	0		-0.11
8.04	450	3618	0.0614502		-0.12
	7323	8.15634
