# Supplementary material for: Interaction Wave Functions and Interaction-Based Coherence and Entanglement in Complex Adaptive Systems
Source: Research Square preprint supplement (doi:10.21203/rs.3.rs-6846233/v1), 2025-06-16
Supplement: Supplementary file 486 [file 30618.xls]

## Sheet: Sheet1
8.15	79	643.85	0.00547016		0.12
8.14	30	244.2	0.00207727		0.11
8.13	147	1195.11	0.0101786		0.1
8.12	407	3304.84	0.0281817		0.09
8.11	151	1224.61	0.0104556		0.08
8.1	621	5030.1	0.0429996		0.07
8.09	325	2629.25	0.0225038		0.06
8.08	735	5938.8	0.0508932		0.05
8.07	583	4704.81	0.0403684		0.04
8.06	1100	8866	0.0761667		0.03
8.05	666	5361.3	0.0461155		0.02
8.04	417	3352.68	0.0288741		0.01
8.03	1019	8182.57	0.0705581		0
8.02	1011	8108.22	0.0700042		-0.01
8.01	1817	14554.2	0.125814		-0.02
8	2541	20328	0.175945		-0.03
7.99	773	6176.27	0.0535244		-0.04
7.98	900	7182	0.0623182		-0.05
7.97	897	7149.09	0.0621105		-0.06
7.96	223	1775.08	0.0154411		-0.07
	14442	8.02873
