# Supplementary material for: Interaction Wave Functions and Interaction-Based Coherence and Entanglement in Complex Adaptive Systems
Source: Research Square preprint supplement (doi:10.21203/rs.3.rs-6846233/v1), 2025-06-16
Supplement: Supplementary file 487 [file 30619.xls]

## Sheet: Sheet1
8.02	10	80.2	0.000558628		0.21
8.01	9	72.09	0.000502765		0.2
8	153	1224	0.00854701		0.19
7.99	29	231.71	0.00162002		0.18
7.98	118	941.64	0.00659181		0.17
7.97	656	5228.32	0.036646		0.16
7.96	280	2228.8	0.0156416		0.15
7.95	459	3649.05	0.025641		0.14
7.94	6	47.64	0.000335177		0.13
7.93	67	531.31	0.00374281		0.12
7.92	60	475.2	0.00335177		0.11
7.91	81	640.71	0.00452489		0.1
7.9	1043	8239.7	0.0582649		0.09
7.89	297	2343.33	0.0165913		0.08
7.88	554	4365.52	0.030948		0.07
7.87	290	2282.3	0.0162002		0.06
7.86	874	6869.64	0.0488241		0.05
7.85	96	753.6	0.00536283		0.04
7.84	355	2783.2	0.0198313		0.03
7.83	130	1017.9	0.00726216		0.02
7.82	120	938.4	0.00670354		0.01
7.81	297	2319.57	0.0165913		0
7.8	951	7417.8	0.0531255		-0.01
7.79	1034	8054.86	0.0577621		-0.02
7.78	1753	13638.3	0.0979275		-0.03
7.77	1446	11235.4	0.0807776		-0.04
7.76	1993	15465.7	0.111335		-0.05
7.75	2954	22893.5	0.165019		-0.06
7.74	825	6385.5	0.0460868		-0.07
7.73	161	1244.53	0.00899391		-0.08
7.72	800	6176	0.0446902		-0.09
	17901	7.80825
