# Supplementary material for: Interaction Wave Functions and Interaction-Based Coherence and Entanglement in Complex Adaptive Systems
Source: Research Square preprint supplement (doi:10.21203/rs.3.rs-6846233/v1), 2025-06-16
Supplement: Supplementary file 488 [file 30620.xls]

## Sheet: Sheet1
7.85	10	78.5	0.00122339		0.07
7.84	353	2767.52	0.0431857		0.06
7.83	589	4611.87	0.0720577		0.05
7.82	437	3417.34	0.0534622		0.04
7.81	382	2983.42	0.0467335		0.03
7.8	1710	13338	0.2092		0.02
7.79	425	3310.75	0.0519941		0.01
7.78	913	7103.14	0.111696		0
7.77	379	2944.83	0.0463665		-0.01
7.76	385	2987.6	0.0471006		-0.02
7.75	1259	9757.25	0.154025		-0.03
7.74	203	1571.22	0.0248348		-0.04
7.73	141	1089.93	0.0172498		-0.05
7.72	300	2316	0.0367017		-0.06
7.71	531	4094.01	0.0649621		-0.07
7.7	157	1208.9	0.0192072		-0.08
	8174	7.77836
