# Supplementary material for: Interaction Wave Functions and Interaction-Based Coherence and Entanglement in Complex Adaptive Systems
Source: Research Square preprint supplement (doi:10.21203/rs.3.rs-6846233/v1), 2025-06-16
Supplement: Supplementary file 489 [file 30623-27.xls]

## Sheet: Sheet1
0.25			141		141			0.00272259
0.24			276		276			0.00532932
0.23			20		20			0.000386182
0.22			561		561			0.0108324
0.21			134		134			0.00258742
0.2			202		202			0.00390044
0.19			279	34	313			0.00604375
0.18			50	21	71			0.00137095
0.17		3	334	0	337			0.00650717
0.16		75	14	15	104			0.00200815
0.15		32	113	0	145			0.00279982
0.14		138	129	6	273			0.00527139
0.13		15	290	8	313			0.00604375
0.12		134	773	67	974			0.0188071
0.11		52	336	83	471			0.0090946
0.1		0	565	284	849			0.0163934
0.09	197	100	805	101	1203			0.0232289
0.08	24	82	356	120	582			0.0112379
0.07	289	0	332	70	691			0.0133426
0.06	103	785	94	2025	3007			0.0580625
0.05	199	350	94	3072	3715			0.0717334
0.04	573	353	409	3654	4989			0.0963332
0.03	287	559	254	2081	3181			0.0614223
0.02	564	751	672	679	2666			0.0514781
0.01	1202	1299	135	527	3163			0.0610747
-8.67362e-17	337	688	250	57	1332			0.0257197
-0.01	2230	505	28	0	2763			0.0533511
-0.02	268	175	258	147	848			0.0163741
-0.03	731	637	242	130	1740			0.0335979
-0.04	433	2670	78	1375	4556			0.0879723
-0.05	124	630	45	191	990			0.019116
-0.06	100	709	20	328	1157			0.0223407
-0.07		19	31	90	140			0.00270328
-0.08			571	260	831			0.0160459
-0.09			30	3879	3909			0.0754793
-0.1			50	101	151			0.00291568
-0.11			0	333	333			0.00642994
-0.12			0	113	113			0.00218193
-0.13			261		261			0.00503968
-0.14			210		210			0.00405492
-0.15			398		398			0.00768503
-0.16			528		528			0.0101952
-0.17			385		385			0.00743401
-0.18			1436		1436			0.0277279
-0.19			808		808			0.0156018
-0.2			392		392			0.00756917
-0.21			47		47			0.000907529
-0.22			80		80			0.00154473
					51789
