# Supplementary material for: Interaction Wave Functions and Interaction-Based Coherence and Entanglement in Complex Adaptive Systems
Source: Research Square preprint supplement (doi:10.21203/rs.3.rs-6846233/v1), 2025-06-16
Supplement: Supplementary file 490 [file 30623.xls]

## Sheet: Sheet1
7.8	197	1536.6	0.0257147		0.09
7.79	24	186.96	0.00313275		0.08
7.78	289	2248.42	0.0377235		0.07
7.77	103	800.31	0.0134447		0.06
7.76	199	1544.24	0.0259757		0.05
7.75	573	4440.75	0.0747944		0.04
7.74	287	2221.38	0.0374625		0.03
7.73	564	4359.72	0.0736196		0.02
7.72	1202	9279.44	0.156899		0.01
7.71	337	2598.27	0.043989		0
7.7	2230	17171	0.291085		-0.01
7.69	268	2060.92	0.0349824		-0.02
7.68	731	5614.08	0.0954184		-0.03
7.67	433	3321.11	0.05652		-0.04
7.66	124	949.84	0.0161859		-0.05
7.65	100	765	0.0130531		-0.06
	7661	7.71414
