# Supplementary material for: Interaction Wave Functions and Interaction-Based Coherence and Entanglement in Complex Adaptive Systems
Source: Research Square preprint supplement (doi:10.21203/rs.3.rs-6846233/v1), 2025-06-16
Supplement: Supplementary file 491 [file 30624.xls]

## Sheet: Sheet1
7.71	3	23.13	0.000278784		0.17
7.7	75	577.5	0.00696961		0.16
7.69	32	246.08	0.0029737		0.15
7.68	138	1059.84	0.0128241		0.14
7.67	15	115.05	0.00139392		0.13
7.66	134	1026.44	0.0124524		0.12
7.65	52	397.8	0.00483226		0.11
7.64	0	0	0		0.1
7.63	100	763	0.00929282		0.09
7.62	82	624.84	0.00762011		0.08
7.61	0	0	0		0.07
7.6	785	5966	0.0729486		0.06
7.59	350	2656.5	0.0325249		0.05
7.58	353	2675.74	0.0328036		0.04
7.57	559	4231.63	0.0519468		0.03
7.56	751	5677.56	0.0697891		0.02
7.55	1299	9807.45	0.120714		0.01
7.54	688	5187.52	0.0639346		0
7.53	505	3802.65	0.0469287		-0.01
7.52	175	1316	0.0162624		-0.02
7.51	637	4783.87	0.0591952		-0.03
7.5	2670	20025	0.248118		-0.04
7.49	630	4718.7	0.0585447		-0.05
7.48	709	5303.32	0.0658861		-0.06
7.47	19	141.93	0.00176564		-0.07
	10761	7.53903
