# Supplementary material for: Interaction Wave Functions and Interaction-Based Coherence and Entanglement in Complex Adaptive Systems
Source: Research Square preprint supplement (doi:10.21203/rs.3.rs-6846233/v1), 2025-06-16
Supplement: Supplementary file 492 [file 30626.xls]

## Sheet: Sheet1
7.83	141	1104.03	0.0104321		0.25
7.82	276	2158.32	0.0204202		0.24
7.81	20	156.2	0.00147973		0.23
7.8	561	4375.8	0.0415064		0.22
7.79	134	1043.86	0.00991418		0.21
7.78	202	1571.56	0.0149453		0.2
7.77	279	2167.83	0.0206422		0.19
7.76	50	388	0.00369932		0.18
7.75	334	2588.5	0.0247115		0.17
7.74	14	108.36	0.00103581		0.16
7.73	113	873.49	0.00836046		0.15
7.72	129	995.88	0.00954424		0.14
7.71	290	2235.9	0.0214561		0.13
7.7	773	5952.1	0.0571915		0.12
7.69	336	2583.84	0.0248594		0.11
7.68	565	4339.2	0.0418023		0.1
7.67	805	6174.35	0.059559		0.09
7.66	356	2726.96	0.0263392		0.08
7.65	332	2539.8	0.0245635		0.07
7.64	94	718.16	0.00695472		0.06
7.63	94	717.22	0.00695472		0.05
7.62	409	3116.58	0.0302604		0.04
7.61	254	1932.94	0.0187925		0.03
7.6	672	5107.2	0.0497189		0.02
7.59	135	1024.65	0.00998816		0.01
7.58	250	1895	0.0184966		0
7.57	28	211.96	0.00207162		-0.01
7.56	258	1950.48	0.0190885		-0.02
7.55	242	1827.1	0.0179047		-0.03
7.54	78	588.12	0.00577094		-0.04
7.53	45	338.85	0.00332939		-0.05
7.52	20	150.4	0.00147973		-0.06
7.51	31	232.81	0.00229358		-0.07
7.5	571	4282.5	0.0422462		-0.08
7.49	30	224.7	0.00221959		-0.09
7.48	50	374	0.00369932		-0.1
7.47	0	0	0		-0.11
7.46	0	0	0		-0.12
7.45	261	1944.45	0.0193104		-0.13
7.44	210	1562.4	0.0155371		-0.14
7.43	398	2957.14	0.0294466		-0.15
7.42	528	3917.76	0.0390648		-0.16
7.41	385	2852.85	0.0284848		-0.17
7.4	1436	10626.4	0.106244		-0.18
7.39	808	5971.12	0.059781		-0.19
7.38	392	2892.96	0.0290027		-0.2
7.37	47	346.39	0.00347736		-0.21
7.36	80	588.8	0.00591891		-0.22
	13516	7.57894
