# Supplementary material for: Interaction Wave Functions and Interaction-Based Coherence and Entanglement in Complex Adaptive Systems
Source: Research Square preprint supplement (doi:10.21203/rs.3.rs-6846233/v1), 2025-06-16
Supplement: Supplementary file 493 [file 30627.xls]

## Sheet: Sheet1
7.73	34	262.82	0.00171276		0.19
7.72	21	162.12	0.00105788		0.18
7.71	0	0	0		0.17
7.7	15	115.5	0.000755629		0.16
7.69	0	0	0		0.15
7.68	6	46.08	0.000302252		0.14
7.67	8	61.36	0.000403002		0.13
7.66	67	513.22	0.00337514		0.12
7.65	83	634.95	0.00418115		0.11
7.64	284	2169.76	0.0143066		0.1
7.63	101	770.63	0.0050879		0.09
7.62	120	914.4	0.00604504		0.08
7.61	70	532.7	0.00352627		0.07
7.6	2025	15390	0.10201		0.06
7.59	3072	23316.5	0.154753		0.05
7.58	3654	27697.3	0.184071		0.04
7.57	2081	15753.2	0.104831		0.03
7.56	679	5133.24	0.0342048		0.02
7.55	527	3978.85	0.0265478		0.01
7.54	57	429.78	0.00287139		0
7.53	0	0	0		-0.01
7.52	147	1105.44	0.00740517		-0.02
7.51	130	976.3	0.00654879		-0.03
7.5	1375	10312.5	0.069266		-0.04
7.49	191	1430.59	0.00962168		-0.05
7.48	328	2453.44	0.0165231		-0.06
7.47	90	672.3	0.00453378		-0.07
7.46	260	1939.6	0.0130976		-0.08
7.45	3879	28898.6	0.195406		-0.09
7.44	101	751.44	0.0050879		-0.1
7.43	333	2474.19	0.016775		-0.11
7.42	113	838.46	0.00569241		-0.12
	19851	7.54295
