# Supplementary material for: Interaction Wave Functions and Interaction-Based Coherence and Entanglement in Complex Adaptive Systems
Source: Research Square preprint supplement (doi:10.21203/rs.3.rs-6846233/v1), 2025-06-16
Supplement: Supplementary file 494 [file 30630.xls]

## Sheet: Sheet1
7.65	100	765	0.0137268		0.16
7.64	90	687.6	0.0123542		0.15
7.63	65	495.95	0.00892244		0.14
7.62	43	327.66	0.00590254		0.13
7.61	43	327.23	0.00590254		0.12
7.6	320	2432	0.0439259		0.11
7.59	426	3233.34	0.0584763		0.1
7.58	290	2198.2	0.0398078		0.09
7.57	94	711.58	0.0129032		0.08
7.56	124	937.44	0.0170213		0.07
7.55	212	1600.6	0.0291009		0.06
7.54	36	271.44	0.00494166		0.05
7.53	121	911.13	0.0166095		0.04
7.52	189	1421.28	0.0259437		0.03
7.51	42	315.42	0.00576527		0.02
7.5	856	6420	0.117502		0.01
7.49	511	3827.39	0.0701441		0
7.48	373	2790.04	0.0512011		-0.01
7.47	224	1673.28	0.0307481		-0.02
7.46	134	999.64	0.018394		-0.03
7.45	847	6310.15	0.116266		-0.04
7.44	432	3214.08	0.0592999		-0.05
7.43	931	6917.33	0.127797		-0.06
7.42	218	1617.56	0.0299245		-0.07
7.41	143	1059.63	0.0196294		-0.08
7.4	265	1961	0.0363761		-0.09
7.39	41	302.99	0.005628		-0.1
7.38	115	848.7	0.0157859		-0.11
	7285	7.49179
