# Supplementary material for: Interaction Wave Functions and Interaction-Based Coherence and Entanglement in Complex Adaptive Systems
Source: Research Square preprint supplement (doi:10.21203/rs.3.rs-6846233/v1), 2025-06-16
Supplement: Supplementary file 495 [file 30602-06.xls]

## Sheet: Sheet1
0.11				11	11	1.21	0.00362438
0.1			119	0	119	11.9	0.0392092
0.09			0	0	0	0	0
0.08			0	0	0	0	0
0.07	23		16	0	39	2.73	0.0128501
0.06	0		0	18	18	1.08	0.00593081
0.05	0		10	160	170	8.5	0.0560132
0.04	13	30	0	117	160	6.4	0.0527183
0.03	0	389	0	3	392	11.76	0.12916
0.02	0	172	0	0	172	3.44	0.0566722
0.01	293	220	10	0	523	5.23	0.172323
0	36	0	272	77	385	0	0.126853
-0.01	273	5	83	133	494	-4.94	0.162768
-0.02	47	18	29	0	94	-1.88	0.030972
-0.03	11	0	0	0	11	-0.33	0.00362438
-0.04	2	0	53	0	55	-2.2	0.0181219
-0.05	2	0	133	0	135	-6.75	0.0444811
-0.06	10	0		70	80	-4.8	0.0263591
-0.07		22		0	22	-1.54	0.00724876
-0.08		31		27	58	-4.64	0.0191104
-0.09		7		0	7	-0.63	0.00230643
-0.1		7		0	7	-0.7	0.00230643
-0.11		0		0	0	0	0
-0.12		16		0	16	-1.92	0.00527183
-0.13		5		0	5	-0.65	0.00164745
-0.14		10		0	10	-1.4	0.00329489
-0.15		0		0	0	0	0
-0.16		0		0	0	0	0
-0.17		41		0	41	-6.97	0.0135091
-0.18				0	0	0	0
-0.19				0	0	0	0
-0.2				0	0	0	0
-0.21				0	0	0	0
-0.22				0	0	0	0
-0.23				0	0	0	0
-0.24				0	0	0	0
-0.25				0	0	0	0
-0.26				0	0	0	0
-0.27				0	0	0	0
-0.28				0	0	0	0
-0.29				0	0	0	0
-0.3				0	0	0	0
-0.31				0	0	0	0
-0.32				0	0	0	0
-0.33				0	0	0	0
-0.34				0	0	0	0
-0.35				0	0	0	0
-0.36				0	0	0	0
-0.37				0	0	0	0
-0.38				0	0	0	0
-0.39				0	0	0	0
-0.4				0	0	0	0
-0.41				0	0	0	0
-0.42				0	0	0	0
-0.43				0	0	0	0
-0.44				0	0	0	0
-0.45				0	0	0	0
-0.46				11	11	-5.06	0.00362438
					3035	0.0025832
