# Supplementary material for: Interaction Wave Functions and Interaction-Based Coherence and Entanglement in Complex Adaptive Systems
Source: Research Square preprint supplement (doi:10.21203/rs.3.rs-6846233/v1), 2025-06-16
Supplement: Supplementary file 496 [file 30602.xls]

## Sheet: Sheet1
13.88	23	319.24	0.0323944		0.07
13.87	0	0	0		0.06
13.86	0	0	0		0.05
13.85	13	180.05	0.0183099		0.04
13.84	0	0	0		0.03
13.83	0	0	0		0.02
13.82	293	4049.26	0.412676		0.01
13.81	36	497.16	0.0507042		0
13.8	273	3767.4	0.384507		-0.01
13.79	47	648.13	0.0661972		-0.02
13.78	11	151.58	0.015493		-0.03
13.77	2	27.54	0.0028169		-0.04
13.76	2	27.52	0.0028169		-0.05
13.75	10	137.5	0.0140845		-0.06
	710	13.8104
