# Supplementary material for: Interaction Wave Functions and Interaction-Based Coherence and Entanglement in Complex Adaptive Systems
Source: Research Square preprint supplement (doi:10.21203/rs.3.rs-6846233/v1), 2025-06-16
Supplement: Supplementary file 497 [file 30604.xls]

## Sheet: Sheet1
14.01	30	420.3	0.0308325		0.04
14	389	5446	0.399794		0.03
13.99	172	2406.28	0.176773		0.02
13.98	220	3075.6	0.226105		0.01
13.97	0	0	0		0
13.96	5	69.8	0.00513875		-0.01
13.95	18	251.1	0.0184995		-0.02
13.94	0	0	0		-0.03
13.93	0	0	0		-0.04
13.92	0	0	0		-0.05
13.91	0	0	0		-0.06
13.9	22	305.8	0.0226105		-0.07
13.89	31	430.59	0.0318602		-0.08
13.88	7	97.16	0.00719424		-0.09
13.87	7	97.09	0.00719424		-0.1
13.86	0	0	0		-0.11
13.85	16	221.6	0.016444		-0.12
13.84	5	69.2	0.00513875		-0.13
13.83	10	138.3	0.0102775		-0.14
13.82	0	0	0		-0.15
13.81	0	0	0		-0.16
13.8	41	565.8	0.0421377		-0.17
	973	13.9719
