# Supplementary material for: Interaction Wave Functions and Interaction-Based Coherence and Entanglement in Complex Adaptive Systems
Source: Research Square preprint supplement (doi:10.21203/rs.3.rs-6846233/v1), 2025-06-16
Supplement: Supplementary file 498 [file 30605.xls]

## Sheet: Sheet1
14.1	119	1677.9	0.164138		0.1
14.09	0	0	0		0.09
14.08	0	0	0		0.08
14.07	16	225.12	0.022069		0.07
14.06	0	0	0		0.06
14.05	10	140.5	0.0137931		0.05
14.04	0	0	0		0.04
14.03	0	0	0		0.03
14.02	0	0	0		0.02
14.01	10	140.1	0.0137931		0.01
14	272	3808	0.375172		0
13.99	83	1161.17	0.114483		-0.01
13.98	29	405.42	0.04		-0.02
13.97	0	0	0		-0.03
13.96	53	739.88	0.0731034		-0.04
13.95	133	1855.35	0.183448		-0.05
	725	14.0047
