# Supplementary material for: Interaction Wave Functions and Interaction-Based Coherence and Entanglement in Complex Adaptive Systems
Source: Research Square preprint supplement (doi:10.21203/rs.3.rs-6846233/v1), 2025-06-16
Supplement: Supplementary file 499 [file 30606.xls]

## Sheet: Sheet1
14.07	11	154.77	0.0175439		0.11
14.06	0	0	0		0.1
14.05	0	0	0		0.09
14.04	0	0	0		0.08
14.03	0	0	0		0.07
14.02	18	252.36	0.0287081		0.06
14.01	160	2241.6	0.255183		0.05
14	117	1638	0.186603		0.04
13.99	3	41.97	0.00478469		0.03
13.98	0	0	0		0.02
13.97	0	0	0		0.01
13.96	77	1074.92	0.122807		0
13.95	133	1855.35	0.212121		-0.01
13.94	0	0	0		-0.02
13.93	0	0	0		-0.03
13.92	0	0	0		-0.04
13.91	0	0	0		-0.05
13.9	70	973	0.111643		-0.06
13.89	0	0	0		-0.07
13.88	27	374.76	0.0430622		-0.08
13.87	0	0	0		-0.09
13.86	0	0	0		-0.1
13.85	0	0	0		-0.11
13.84	0	0	0		-0.12
13.83	0	0	0		-0.13
13.82	0	0	0		-0.14
13.81	0	0	0		-0.15
13.8	0	0	0		-0.16
13.79	0	0	0		-0.17
13.78	0	0	0		-0.18
13.77	0	0	0		-0.19
13.76	0	0	0		-0.2
13.75	0	0	0		-0.21
13.74	0	0	0		-0.22
13.73	0	0	0		-0.23
13.72	0	0	0		-0.24
13.71	0	0	0		-0.25
13.7	0	0	0		-0.26
13.69	0	0	0		-0.27
13.68	0	0	0		-0.28
13.67	0	0	0		-0.29
13.66	0	0	0		-0.3
13.65	0	0	0		-0.31
13.64	0	0	0		-0.32
13.63	0	0	0		-0.33
13.62	0	0	0		-0.34
13.61	0	0	0		-0.35
13.6	0	0	0		-0.36
13.59	0	0	0		-0.37
13.58	0	0	0		-0.38
13.57	0	0	0		-0.39
13.56	0	0	0		-0.4
13.55	0	0	0		-0.41
13.54	0	0	0		-0.42
13.53	0	0	0		-0.43
13.52	0	0	0		-0.44
13.51	0	0	0		-0.45
13.5	11	148.5	0.0175439		-0.46
	627	13.9637
