# Supplementary material for: Interaction Wave Functions and Interaction-Based Coherence and Entanglement in Complex Adaptive Systems
Source: Research Square preprint supplement (doi:10.21203/rs.3.rs-6846233/v1), 2025-06-16
Supplement: Supplementary file 500 [file 30609-13.xls]

## Sheet: Sheet1
0.23			65			65	14.95	0.00136704
0.22			0			0	0	0
0.21			0			0	0	0
0.2			72			72	14.4	0.00151426
0.19			0			0	0	0
0.18			74			74	13.32	0.00155632
0.17			0			0	0	0
0.16			0			0	0	0
0.15			628			628	94.2	0.0132077
0.14			0	54	60	114	15.96	0.00239758
0.13			229	0	0	229	29.77	0.00481619
0.12			0	5	210	215	25.8	0.00452175
0.11			486	0	0	486	53.46	0.0102213
0.1			144	0	0	144	14.4	0.00302852
0.09			405	0	355	760	68.4	0.0159838
0.08	4		0	0	0	4	0.32	8.41255e-05
0.07	0		0	35	22	57	3.99	0.00119879
0.06	0		0	20	95	115	6.9	0.00241861
0.05	49		305	0	110	464	23.2	0.00975856
0.04	407		719	74	904	2104	84.16	0.04425
0.03	0	151	0	477	101	729	21.87	0.0153319
0.02	2341	1040	0	2127	20	5528	110.56	0.116261
0.01	2589	2635	125	431	0	5780	57.8	0.121561
-5.89806e-17	5269	2233	3989	0	0	11491	-6.77746e-13	0.241672
-0.01	2832	1322	178	203	319	4854	-48.54	0.102086
-0.02	20	344	1042	234	476	2116	-42.32	0.0445024
-0.03		1604	432	807	59	2902	-87.06	0.0610331
-0.04		348	696	800	138	1982	-79.28	0.0416842
-0.05		0	2831	0	0	2831	-141.55	0.0595398
-0.06		0	1470	389	518	2377	-142.62	0.0499916
-0.07		0	0		0	0	0	0
-0.08		0	0		48	48	-3.84	0.00100951
-0.09		150	0		0	150	-13.5	0.00315471
-0.1			0		60	60	-6	0.00126188
-0.11			300		448	748	-82.28	0.0157315
-0.12			400			400	-48	0.00841255
-0.13			0			0	0	0
-0.14			0			0	0	0
-0.15			21			21	-3.15	0.000441659
						47548	-0.000939682
