# Supplementary material for: Interaction Wave Functions and Interaction-Based Coherence and Entanglement in Complex Adaptive Systems
Source: Research Square preprint supplement (doi:10.21203/rs.3.rs-6846233/v1), 2025-06-16
Supplement: Supplementary file 501 [file 30609.xls]

## Sheet: Sheet1
13.88	4	55.52	0.000296055		0.08
13.87	0	0	0		0.07
13.86	0	0	0		0.06
13.85	49	678.65	0.00362667		0.05
13.84	407	5632.88	0.0301236		0.04
13.83	0	0	0		0.03
13.82	2341	32352.6	0.173266		0.02
13.81	2589	35754.1	0.191622		0.01
13.8	5269	72712.2	0.389979		0
13.79	2832	39053.3	0.209607		-0.01
13.78	20	275.6	0.00148028		-0.02
	13511	13.8047
