# Supplementary material for: Interaction Wave Functions and Interaction-Based Coherence and Entanglement in Complex Adaptive Systems
Source: Research Square preprint supplement (doi:10.21203/rs.3.rs-6846233/v1), 2025-06-16
Supplement: Supplementary file 502 [file 30610.xls]

## Sheet: Sheet1
13.82	151	2086.82	0.0153658		0.03
13.81	1040	14362.4	0.105831		0.02
13.8	2635	36363	0.268139		0.01
13.79	2233	30793.1	0.227231		0
13.78	1322	18217.2	0.134527		-0.01
13.77	344	4736.88	0.0350056		-0.02
13.76	1604	22071	0.163224		-0.03
13.75	348	4785	0.0354126		-0.04
13.74	0	0	0		-0.05
13.73	0	0	0		-0.06
13.72	0	0	0		-0.07
13.71	0	0	0		-0.08
13.7	150	2055	0.0152641		-0.09
	9827	13.7855
