# Supplementary material for: Interaction Wave Functions and Interaction-Based Coherence and Entanglement in Complex Adaptive Systems
Source: Research Square preprint supplement (doi:10.21203/rs.3.rs-6846233/v1), 2025-06-16
Supplement: Supplementary file 503 [file 30611.xls]

## Sheet: Sheet1
14.08	65	915.2	0.0044487		0.23
14.07	0	0	0		0.22
14.06	0	0	0		0.21
14.05	72	1011.6	0.00492779		0.2
14.04	0	0	0		0.19
14.03	74	1038.22	0.00506468		0.18
14.02	0	0	0		0.17
14.01	0	0	0		0.16
14	628	8792	0.0429813		0.15
13.99	0	0	0		0.14
13.98	229	3201.42	0.0156731		0.13
13.97	0	0	0		0.12
13.96	486	6784.56	0.0332626		0.11
13.95	144	2008.8	0.00985559		0.1
13.94	405	5645.7	0.0277188		0.09
13.93	0	0	0		0.08
13.92	0	0	0		0.07
13.91	0	0	0		0.06
13.9	305	4239.5	0.0208747		0.05
13.89	719	9986.91	0.0492095		0.04
13.88	0	0	0		0.03
13.87	0	0	0		0.02
13.86	125	1732.5	0.0085552		0.01
13.85	3989	55247.7	0.273013		0
13.84	178	2463.52	0.0121826		-0.01
13.83	1042	14410.9	0.0713161		-0.02
13.82	432	5970.24	0.0295668		-0.03
13.81	696	9611.76	0.0476353		-0.04
13.8	2831	39067.8	0.193758		-0.05
13.79	1470	20271.3	0.100609		-0.06
13.78	0	0	0		-0.07
13.77	0	0	0		-0.08
13.76	0	0	0		-0.09
13.75	0	0	0		-0.1
13.74	300	4122	0.0205325		-0.11
13.73	400	5492	0.0273766		-0.12
13.72	0	0	0		-0.13
13.71	0	0	0		-0.14
13.7	21	287.7	0.00143727		-0.15
	14611	13.8458
