# Supplementary material for: Interaction Wave Functions and Interaction-Based Coherence and Entanglement in Complex Adaptive Systems
Source: Research Square preprint supplement (doi:10.21203/rs.3.rs-6846233/v1), 2025-06-16
Supplement: Supplementary file 504 [file 30612.xls]

## Sheet: Sheet1
14.12	54	762.48	0.00954738		0.14
14.11	0	0	0		0.13
14.1	5	70.5	0.000884017		0.12
14.09	0	0	0		0.11
14.08	0	0	0		0.1
14.07	0	0	0		0.09
14.06	0	0	0		0.08
14.05	35	491.75	0.00618812		0.07
14.04	20	280.8	0.00353607		0.06
14.03	0	0	0		0.05
14.02	74	1037.48	0.0130835		0.04
14.01	477	6682.77	0.0843352		0.03
14	2127	29778	0.376061		0.02
13.99	431	6029.69	0.0762023		0.01
13.98	0	0	0		0
13.97	203	2835.91	0.0358911		-0.01
13.96	234	3266.64	0.041372		-0.02
13.95	807	11257.7	0.14268		-0.03
13.94	800	11152	0.141443		-0.04
13.93	0	0	0		-0.05
13.92	389	5414.88	0.0687765		-0.06
	5656	13.9782
