# Supplementary material for: Interaction Wave Functions and Interaction-Based Coherence and Entanglement in Complex Adaptive Systems
Source: Research Square preprint supplement (doi:10.21203/rs.3.rs-6846233/v1), 2025-06-16
Supplement: Supplementary file 505 [file 30613.xls]

## Sheet: Sheet1
14.25	60	855	0.0152168		0.14
14.24	0	0	0		0.13
14.23	210	2988.3	0.0532589		0.12
14.22	0	0	0		0.11
14.21	0	0	0		0.1
14.2	355	5041	0.090033		0.09
14.19	0	0	0		0.08
14.18	22	311.96	0.00557951		0.07
14.17	95	1346.15	0.0240933		0.06
14.16	110	1557.6	0.0278975		0.05
14.15	904	12791.6	0.229267		0.04
14.14	101	1428.14	0.025615		0.03
14.13	20	282.6	0.00507228		0.02
14.12	0	0	0		0.01
14.11	0	0	0		0
14.1	319	4497.9	0.0809029		-0.01
14.09	476	6706.84	0.12072		-0.02
14.08	59	830.72	0.0149632		-0.03
14.07	138	1941.66	0.0349987		-0.04
14.06	0	0	0		-0.05
14.05	518	7277.9	0.131372		-0.06
14.04	0	0	0		-0.07
14.03	48	673.44	0.0121735		-0.08
14.02	0	0	0		-0.09
14.01	60	840.6	0.0152168		-0.1
14	448	6272	0.113619		-0.11
	3943	14.1119
