# Supplementary material for: Interaction Wave Functions and Interaction-Based Coherence and Entanglement in Complex Adaptive Systems
Source: Research Square preprint supplement (doi:10.21203/rs.3.rs-6846233/v1), 2025-06-16
Supplement: Supplementary file 506 [file 30616-20.xls]

## Sheet: Sheet1
0.21			200			200	42	0.00883861
0.2		80	180			260	52	0.0114902
0.19		26	0			26	4.94	0.00114902
0.18	249	1	0			250	45	0.0110483
0.17	86	0	217			303	51.51	0.0133905
0.16	52	0	13			65	10.4	0.00287255
0.15	2	117	230			349	52.35	0.0154234
0.14	7	0	185			192	26.88	0.00848506
0.13	619	0	95			714	92.82	0.0315538
0.12	111	33	0			144	17.28	0.0063638
0.11	94	0	1078	26		1198	131.78	0.0529433
0.1	188	363	10	172		733	73.3	0.0323935
0.09	232	140	228	0		600	54	0.0265158
0.08	487	68	456	280		1291	103.28	0.0570532
0.07	12	0	110	0		122	8.54	0.00539155
0.06	63	6	489	0		558	33.48	0.0246597
0.05	73	341	479	258		1151	57.55	0.0508662
0.04	131	86	112	60	10	399	15.96	0.017633
0.03	315	0	218	54	98	685	20.55	0.0302722
0.02	0	85	0	120	486	691	13.82	0.0305374
0.01	40	271	588	102	0	1001	10.01	0.0442372
-5.89806e-17	11	759	422	482	56	1730	-1.02036e-13	0.076454
-0.01	40	2	270	50	0	362	-3.62	0.0159979
-0.02	493	90	0	6	253	842	-16.84	0.0372105
-0.03	0	13	80	496	45	634	-19.02	0.0280184
-0.04	0	120	555	0	144	819	-32.76	0.0361941
-0.05	0	583	199	578	15	1375	-68.75	0.0607654
-0.06	0	0	460	2	42	504	-30.24	0.0222733
-0.07	145	37	266	60		508	-35.56	0.0224501
-0.08	0	0	84	136		220	-17.6	0.00972247
-0.09	0	358	466	0		824	-74.16	0.0364151
-0.1	0	9	305	50		364	-36.4	0.0160863
-0.11	0	0	0			0	0	0
-0.12	519	2	0			521	-62.52	0.0230246
-0.13	0	240	485			725	-94.25	0.03204
-0.14	0	0	295			295	-41.3	0.0130369
-0.15	0	101	408			509	-76.35	0.0224943
-0.16	0		39			39	-6.24	0.00172353
-0.17	422		227			649	-110.33	0.0286813
-0.18	0		128			128	-23.04	0.00565671
-0.19	200		124			324	-61.56	0.0143185
-0.2	0					0	0	0
-0.21	0					0	0	0
-0.22	100					100	-22	0.0044193
-0.23	0					0	0	0
-0.24	79					79	-18.96	0.00349125
-0.25	0					0	0	0
-0.26	0					0	0	0
-0.27	140					140	-37.8	0.00618702
-0.28	0					0	0	0
-0.29	0					0	0	0
-0.3	0					0	0	0
-0.31	0					0	0	0
-0.32	0					0	0	0
-0.33	0					0	0	0
-0.34	5					5	-1.7	0.000220965
						22628	0.00116891
