# Supplementary material for: Interaction Wave Functions and Interaction-Based Coherence and Entanglement in Complex Adaptive Systems
Source: Research Square preprint supplement (doi:10.21203/rs.3.rs-6846233/v1), 2025-06-16
Supplement: Supplementary file 507 [file 30616.xls]

## Sheet: Sheet1
14.5	249	3610.5	0.0506612		0.18
14.49	86	1246.14	0.0174975		0.17
14.48	52	752.96	0.0105799		0.16
14.47	2	28.94	0.000406918		0.15
14.46	7	101.22	0.00142421		0.14
14.45	619	8944.55	0.125941		0.13
14.44	111	1602.84	0.0225839		0.12
14.43	94	1356.42	0.0191251		0.11
14.42	188	2710.96	0.0382503		0.1
14.41	232	3343.12	0.0472024		0.09
14.4	487	7012.8	0.0990844		0.08
14.39	12	172.68	0.00244151		0.07
14.38	63	905.94	0.0128179		0.06
14.37	73	1049.01	0.0148525		0.05
14.36	131	1881.16	0.0266531		0.04
14.35	315	4520.25	0.0640895		0.03
14.34	0	0	0		0.02
14.33	40	573.2	0.00813835		0.01
14.32	11	157.52	0.00223805		0
14.31	40	572.4	0.00813835		-0.01
14.3	493	7049.9	0.100305		-0.02
14.29	0	0	0		-0.03
14.28	0	0	0		-0.04
14.27	0	0	0		-0.05
14.26	0	0	0		-0.06
14.25	145	2066.25	0.0295015		-0.07
14.24	0	0	0		-0.08
14.23	0	0	0		-0.09
14.22	0	0	0		-0.1
14.21	0	0	0		-0.11
14.2	519	7369.8	0.105595		-0.12
14.19	0	0	0		-0.13
14.18	0	0	0		-0.14
14.17	0	0	0		-0.15
14.16	0	0	0		-0.16
14.15	422	5971.3	0.0858596		-0.17
14.14	0	0	0		-0.18
14.13	200	2826	0.0406918		-0.19
14.12	0	0	0		-0.2
14.11	0	0	0		-0.21
14.1	100	1410	0.0203459		-0.22
14.09	0	0	0		-0.23
14.08	79	1112.32	0.0160732		-0.24
14.07	0	0	0		-0.25
14.06	0	0	0		-0.26
14.05	140	1967	0.0284842		-0.27
14.04	0	0	0		-0.28
14.03	0	0	0		-0.29
14.02	0	0	0		-0.3
14.01	0	0	0		-0.31
14	0	0	0		-0.32
13.99	0	0	0		-0.33
13.98	5	69.9	0.00101729		-0.34
	4915	14.3205
