# Supplementary material for: Interaction Wave Functions and Interaction-Based Coherence and Entanglement in Complex Adaptive Systems
Source: Research Square preprint supplement (doi:10.21203/rs.3.rs-6846233/v1), 2025-06-16
Supplement: Supplementary file 508 [file 30617.xls]

## Sheet: Sheet1
14.6	80	1168	0.0203511		0.2
14.59	26	379.34	0.00661409		0.19
14.58	1	14.58	0.000254388		0.18
14.57	0	0	0		0.17
14.56	0	0	0		0.16
14.55	117	1702.35	0.0297634		0.15
14.54	0	0	0		0.14
14.53	0	0	0		0.13
14.52	33	479.16	0.00839481		0.12
14.51	0	0	0		0.11
14.5	363	5263.5	0.0923429		0.1
14.49	140	2028.6	0.0356143		0.09
14.48	68	984.64	0.0172984		0.08
14.47	0	0	0		0.07
14.46	6	86.76	0.00152633		0.06
14.45	341	4927.45	0.0867464		0.05
14.44	86	1241.84	0.0218774		0.04
14.43	0	0	0		0.03
14.42	85	1225.7	0.021623		0.02
14.41	271	3905.11	0.0689392		0.01
14.4	759	10929.6	0.193081		0
14.39	2	28.78	0.000508776		-0.01
14.38	90	1294.2	0.0228949		-0.02
14.37	13	186.81	0.00330705		-0.03
14.36	120	1723.2	0.0305266		-0.04
14.35	583	8366.05	0.148308		-0.05
14.34	0	0	0		-0.06
14.33	37	530.21	0.00941236		-0.07
14.32	0	0	0		-0.08
14.31	358	5122.98	0.091071		-0.09
14.3	9	128.7	0.00228949		-0.1
14.29	0	0	0		-0.11
14.28	2	28.56	0.000508776		-0.12
14.27	240	3424.8	0.0610532		-0.13
14.26	0	0	0		-0.14
14.25	101	1439.25	0.0256932		-0.15
	3931	14.401
