# Supplementary material for: Interaction Wave Functions and Interaction-Based Coherence and Entanglement in Complex Adaptive Systems
Source: Research Square preprint supplement (doi:10.21203/rs.3.rs-6846233/v1), 2025-06-16
Supplement: Supplementary file 509 [file 30618.xls]

## Sheet: Sheet1
14.7	200	2940	0.0206164		0.21
14.69	180	2644.2	0.0185548		0.2
14.68	0	0	0		0.19
14.67	0	0	0		0.18
14.66	217	3181.22	0.0223688		0.17
14.65	13	190.45	0.00134007		0.16
14.64	230	3367.2	0.0237089		0.15
14.63	185	2706.55	0.0190702		0.14
14.62	95	1388.9	0.0097928		0.13
14.61	0	0	0		0.12
14.6	1078	15738.8	0.111123		0.11
14.59	10	145.9	0.00103082		0.1
14.58	228	3324.24	0.0235027		0.09
14.57	456	6643.92	0.0470055		0.08
14.56	110	1601.6	0.011339		0.07
14.55	489	7114.95	0.0504072		0.06
14.54	479	6964.66	0.0493764		0.05
14.53	112	1627.36	0.0115452		0.04
14.52	218	3165.36	0.0224719		0.03
14.51	0	0	0		0.02
14.5	588	8526	0.0606123		0.01
14.49	422	6114.78	0.0435007		0
14.48	270	3909.6	0.0278322		-0.01
14.47	0	0	0		-0.02
14.46	80	1156.8	0.00824657		-0.03
14.45	555	8019.75	0.0572106		-0.04
14.44	199	2873.56	0.0205133		-0.05
14.43	460	6637.8	0.0474178		-0.06
14.42	266	3835.72	0.0274199		-0.07
14.41	84	1210.44	0.0086589		-0.08
14.4	466	6710.4	0.0480363		-0.09
14.39	305	4388.95	0.0314401		-0.1
14.38	0	0	0		-0.11
14.37	0	0	0		-0.12
14.36	485	6964.6	0.0499948		-0.13
14.35	295	4233.25	0.0304092		-0.14
14.34	408	5850.72	0.0420575		-0.15
14.33	39	558.87	0.0040202		-0.16
14.32	227	3250.64	0.0233996		-0.17
14.31	128	1831.68	0.0131945		-0.18
14.3	124	1773.2	0.0127822		-0.19
	9701	14.4925
