# Supplementary material for: Interaction Wave Functions and Interaction-Based Coherence and Entanglement in Complex Adaptive Systems
Source: Research Square preprint supplement (doi:10.21203/rs.3.rs-6846233/v1), 2025-06-16
Supplement: Supplementary file 510 [file 30619.xls]

## Sheet: Sheet1
14.56	26	378.56	0.00886767		0.11
14.55	172	2502.6	0.058663		0.1
14.54	0	0	0		0.09
14.53	280	4068.4	0.095498		0.08
14.52	0	0	0		0.07
14.51	0	0	0		0.06
14.5	258	3741	0.0879945		0.05
14.49	60	869.4	0.0204638		0.04
14.48	54	781.92	0.0184175		0.03
14.47	120	1736.4	0.0409277		0.02
14.46	102	1474.92	0.0347885		0.01
14.45	482	6964.9	0.164393		0
14.44	50	722	0.0170532		-0.01
14.43	6	86.58	0.00204638		-0.02
14.42	496	7152.32	0.169168		-0.03
14.41	0	0	0		-0.04
14.4	578	8323.2	0.197135		-0.05
14.39	2	28.78	0.000682128		-0.06
14.38	60	862.8	0.0204638		-0.07
14.37	136	1954.32	0.0463847		-0.08
14.36	0	0	0		-0.09
14.35	50	717.5	0.0170532		-0.1
	2932	14.4494
