# Supplementary material for: Interaction Wave Functions and Interaction-Based Coherence and Entanglement in Complex Adaptive Systems
Source: Research Square preprint supplement (doi:10.21203/rs.3.rs-6846233/v1), 2025-06-16
Supplement: Supplementary file 511 [file 30620.xls]

## Sheet: Sheet1
14.46	10	144.6	0.00870322		0.04
14.45	98	1416.1	0.0852916		0.03
14.44	486	7017.84	0.422977		0.02
14.43	0	0	0		0.01
14.42	56	807.52	0.048738		0
14.41	0	0	0		-0.01
14.4	253	3643.2	0.220191		-0.02
14.39	45	647.55	0.0391645		-0.03
14.38	144	2070.72	0.125326		-0.04
14.37	15	215.55	0.0130548		-0.05
14.36	42	603.12	0.0365535		-0.06
	1149	14.4179
