# Supplementary material for: Interaction Wave Functions and Interaction-Based Coherence and Entanglement in Complex Adaptive Systems
Source: Research Square preprint supplement (doi:10.21203/rs.3.rs-6846233/v1), 2025-06-16
Supplement: Supplementary file 512 [file 30623-27.xls]

## Sheet: Sheet1
0.27			233			233		0.00267484
0.26			127			127		0.00145796
0.25			367			367		0.00421316
0.24	705		1			706		0.00810488
0.23	919	633	0			1552		0.017817
0.22	1607	0	374			1981		0.0227419
0.21	565	718	0			1283		0.0147288
0.2	11	0	275			286		0.00328328
0.19	1183	0	0			1183		0.0135808
0.18	14	1443	50			1507		0.0173004
0.17	456	756	254			1466		0.0168297
0.16	851	1059	0			1910		0.0219268
0.15	0	247	91			338		0.00388024
0.14	3824	230	0			4054		0.0465399
0.13	1637	1277	0			2914		0.0334527
0.12	1129	1	615			1745		0.0200326
0.11	710	576	96			1382		0.0158654
0.1	644	0	70			714		0.00819672
0.09	1461	218	173	130		1982		0.0227534
0.08	539	4702	0	0		5241		0.0601667
0.07	477	707	570	147		1901		0.0218235
0.06	65	1042	859	230		2196		0.0252101
0.05	131	1475	229	290	34	2159		0.0247853
0.04	1559	163	183	114	520	2539		0.0291477
0.03	10	2014	508	355	173	3060		0.0351288
0.02	835	211	88	623	522	2279		0.0261629
0.01	235	877	4	365	202	1683		0.0193208
-8.67362e-17	211	534	993	252	539	2529		0.0290329
-0.01	661	279	185	654	864	2643		0.0303416
-0.02	273	3708	175	130	0	4286		0.0492033
-0.03	619	858	559	606	278	2920		0.0335216
-0.04	8	862	104	182	0	1156		0.0132709
-0.05	31	779	197	349	5	1361		0.0156243
-0.06	2041	232	0	0	141	2414		0.0277127
-0.07	962	782	323	152	0	2219		0.0254741
-0.08	538	0	774	29	0	1341		0.0153947
-0.09	0	355	50	0	0	405		0.0046494
-0.1	0	150	103	181	0	434		0.00498232
-0.11	107	699	120	7	0	933		0.0107108
-0.12	0	1859	0		0	1859		0.0213413
-0.13	0	1174	3259		0	4433		0.0508908
-0.14	17	1060	451		0	1528		0.0175414
-0.15	23	726	55		0	804		0.00922992
-0.16	232	1173	0		0	1405		0.0161294
-0.17	0	964	160		0	1124		0.0129035
-0.18	0	0	3		0	3		3.444e-05
-0.19	0	252			0	252		0.00289296
-0.2	1	110			0	111		0.00127428
-0.21	3	433			119	555		0.0063714
-0.22	0	407				407		0.00467236
-0.23	70	134				204		0.00234192
-0.24	0	0				0		0
-0.25	0	0				0		0
-0.26	50	643				693		0.00795564
-0.27	0	0				0		0
-0.28	64	0				64		0.00073472
-0.29	0	0				0		0
-0.3	0	0				0		0
-0.31	64	0				64		0.00073472
-0.32	0	145				145		0.0016646
-0.33	10	0				10		0.0001148
-0.34	0	0				0		0
-0.35	30	0				30		0.0003444
-0.36	325	0				325		0.003731
-0.37	0	23				23		0.00026404
-0.38	0					0		0
-0.39	0					0		0
-0.4	0					0		0
-0.41	137					137		0.00157276
-0.42	0					0		0
-0.43	0					0		0
-0.44	0					0		0
-0.45	34					34		0.00039032
-0.46	302					302		0.00346696
-0.47	16					16		0.00018368
-0.48	0					0		0
-0.49	0					0		0
-0.5	227					227		0.00260596
-0.51	121					121		0.00138908
-0.52	80					80		0.0009184
-0.53	0					0		0
-0.54	135					135		0.0015498
-0.55	127					127		0.00145796
-0.56	909					909		0.0104353
-0.57	188					188		0.00215824
-0.58	369					369		0.00423612
-0.59	152					152		0.00174496
-0.6	263					263		0.00301924
-0.61	468					468		0.00537264
-0.62	112					112		0.00128576
						87108
