# Supplementary material for: Interaction Wave Functions and Interaction-Based Coherence and Entanglement in Complex Adaptive Systems
Source: Research Square preprint supplement (doi:10.21203/rs.3.rs-6846233/v1), 2025-06-16
Supplement: Supplementary file 513 [file 30623.xls]

## Sheet: Sheet1
15.1	705	10645.5	0.0238603		0.24
15.09	919	13867.7	0.031103		0.23
15.08	1607	24233.6	0.0543879		0.22
15.07	565	8514.55	0.0191221		0.21
15.06	11	165.66	0.000372288		0.2
15.05	1183	17804.2	0.0400379		0.19
15.04	14	210.56	0.000473821		0.18
15.03	456	6853.68	0.015433		0.17
15.02	851	12782	0.0288016		0.16
15.01	0	0	0		0.15
15	3824	57360	0.129421		0.14
14.99	1637	24538.6	0.0554033		0.13
14.98	1129	16912.4	0.0382103		0.12
14.97	710	10628.7	0.0240295		0.11
14.96	644	9634.24	0.0217958		0.1
14.95	1461	21842	0.0494466		0.09
14.94	539	8052.66	0.0182421		0.08
14.93	477	7121.61	0.0161438		0.07
14.92	65	969.8	0.00219988		0.06
14.91	131	1953.21	0.00443361		0.05
14.9	1559	23229.1	0.0527634		0.04
14.89	10	148.9	0.000338444		0.03
14.88	835	12424.8	0.0282601		0.02
14.87	235	3494.45	0.00795343		0.01
14.86	211	3135.46	0.00714116		0
14.85	661	9815.85	0.0223711		-0.01
14.84	273	4051.32	0.00923952		-0.02
14.83	619	9179.77	0.0209497		-0.03
14.82	8	118.56	0.000270755		-0.04
14.81	31	459.11	0.00104918		-0.05
14.8	2041	30206.8	0.0690764		-0.06
14.79	962	14228	0.0325583		-0.07
14.78	538	7951.64	0.0182083		-0.08
14.77	0	0	0		-0.09
14.76	0	0	0		-0.1
14.75	107	1578.25	0.00362135		-0.11
14.74	0	0	0		-0.12
14.73	0	0	0		-0.13
14.72	17	250.24	0.000575355		-0.14
14.71	23	338.33	0.000778421		-0.15
14.7	232	3410.4	0.0078519		-0.16
14.69	0	0	0		-0.17
14.68	0	0	0		-0.18
14.67	0	0	0		-0.19
14.66	1	14.66	3.38444e-05		-0.2
14.65	3	43.95	0.000101533		-0.21
14.64	0	0	0		-0.22
14.63	70	1024.1	0.00236911		-0.23
14.62	0	0	0		-0.24
14.61	0	0	0		-0.25
14.6	50	730	0.00169222		-0.26
14.59	0	0	0		-0.27
14.58	64	933.12	0.00216604		-0.28
14.57	0	0	0		-0.29
14.56	0	0	0		-0.3
14.55	64	931.2	0.00216604		-0.31
14.54	0	0	0		-0.32
14.53	10	145.3	0.000338444		-0.33
14.52	0	0	0		-0.34
14.51	30	435.3	0.00101533		-0.35
14.5	325	4712.5	0.0109994		-0.36
14.49	0	0	0		-0.37
14.48	0	0	0		-0.38
14.47	0	0	0		-0.39
14.46	0	0	0		-0.4
14.45	137	1979.65	0.00463668		-0.41
14.44	0	0	0		-0.42
14.43	0	0	0		-0.43
14.42	0	0	0		-0.44
14.41	34	489.94	0.00115071		-0.45
14.4	302	4348.8	0.010221		-0.46
14.39	16	230.24	0.00054151		-0.47
14.38	0	0	0		-0.48
14.37	0	0	0		-0.49
14.36	227	3259.72	0.00768268		-0.5
14.35	121	1736.35	0.00409517		-0.51
14.34	80	1147.2	0.00270755		-0.52
14.33	0	0	0		-0.53
14.32	135	1933.2	0.00456899		-0.54
14.31	127	1817.37	0.00429824		-0.55
14.3	909	12998.7	0.0307645		-0.56
14.29	188	2686.52	0.00636274		-0.57
14.28	369	5269.32	0.0124886		-0.58
14.27	152	2169.04	0.00514435		-0.59
14.26	263	3750.38	0.00890107		-0.6
14.25	468	6669	0.0158392		-0.61
14.24	112	1594.88	0.00379057		-0.62
	29547	14.8632
