# Supplementary material for: Interaction Wave Functions and Interaction-Based Coherence and Entanglement in Complex Adaptive Systems
Source: Research Square preprint supplement (doi:10.21203/rs.3.rs-6846233/v1), 2025-06-16
Supplement: Supplementary file 514 [file 30624.xls]

## Sheet: Sheet1
15.35	633	9716.55	0.0172527		0.23
15.34	0	0	0		0.22
15.33	718	11006.9	0.0195694		0.21
15.32	0	0	0		0.2
15.31	0	0	0		0.19
15.3	1443	22077.9	0.0393295		0.18
15.29	756	11559.2	0.0206051		0.17
15.28	1059	16181.5	0.0288635		0.16
15.27	247	3771.69	0.00673208		0.15
15.26	230	3509.8	0.00626874		0.14
15.25	1277	19474.3	0.0348051		0.13
15.24	1	15.24	2.72554e-05		0.12
15.23	576	8772.48	0.0156991		0.11
15.22	0	0	0		0.1
15.21	218	3315.78	0.00594167		0.09
15.2	4702	71470.4	0.128155		0.08
15.19	707	10739.3	0.0192696		0.07
15.18	1042	15817.6	0.0284001		0.06
15.17	1475	22375.8	0.0402017		0.05
15.16	163	2471.08	0.00444263		0.04
15.15	2014	30512.1	0.0548923		0.03
15.14	211	3194.54	0.00575089		0.02
15.13	877	13269	0.023903		0.01
15.12	534	8074.08	0.0145544		0
15.11	279	4215.69	0.00760425		-0.01
15.1	3708	55990.8	0.101063		-0.02
15.09	858	12947.2	0.0233851		-0.03
15.08	862	12999	0.0234941		-0.04
15.07	779	11739.5	0.0212319		-0.05
15.06	232	3493.92	0.00632325		-0.06
15.05	782	11769.1	0.0213137		-0.07
15.04	0	0	0		-0.08
15.03	355	5335.65	0.00967566		-0.09
15.02	150	2253	0.00408831		-0.1
15.01	699	10492	0.0190515		-0.11
15	1859	27885	0.0506678		-0.12
14.99	1174	17598.3	0.0319978		-0.13
14.98	1060	15878.8	0.0288907		-0.14
14.97	726	10868.2	0.0197874		-0.15
14.96	1173	17548.1	0.0319706		-0.16
14.95	964	14411.8	0.0262742		-0.17
14.94	0	0	0		-0.18
14.93	252	3762.36	0.00686836		-0.19
14.92	110	1641.2	0.00299809		-0.2
14.91	433	6456.03	0.0118016		-0.21
14.9	407	6064.3	0.0110929		-0.22
14.89	134	1995.26	0.00365222		-0.23
14.88	0	0	0		-0.24
14.87	0	0	0		-0.25
14.86	643	9554.98	0.0175252		-0.26
14.85	0	0	0		-0.27
14.84	0	0	0		-0.28
14.83	0	0	0		-0.29
14.82	0	0	0		-0.3
14.81	0	0	0		-0.31
14.8	145	2146	0.00395203		-0.32
14.79	0	0	0		-0.33
14.78	0	0	0		-0.34
14.77	0	0	0		-0.35
14.76	0	0	0		-0.36
14.75	23	339.25	0.000626874		-0.37
	36690	15.1189
