# Supplementary material for: Interaction Wave Functions and Interaction-Based Coherence and Entanglement in Complex Adaptive Systems
Source: Research Square preprint supplement (doi:10.21203/rs.3.rs-6846233/v1), 2025-06-16
Supplement: Supplementary file 515 [file 30625.xls]

## Sheet: Sheet1
15.2	233	3541.6	0.0183783		0.27
15.19	127	1929.13	0.0100174		0.26
15.18	367	5571.06	0.0289478		0.25
15.17	1	15.17	7.88768e-05		0.24
15.16	0	0	0		0.23
15.15	374	5666.1	0.0294999		0.22
15.14	0	0	0		0.21
15.13	275	4160.75	0.0216911		0.2
15.12	0	0	0		0.19
15.11	50	755.5	0.00394384		0.18
15.1	254	3835.4	0.0200347		0.17
15.09	0	0	0		0.16
15.08	91	1372.28	0.00717779		0.15
15.07	0	0	0		0.14
15.06	0	0	0		0.13
15.05	615	9255.75	0.0485092		0.12
15.04	96	1443.84	0.00757217		0.11
15.03	70	1052.1	0.00552138		0.1
15.02	173	2598.46	0.0136457		0.09
15.01	0	0	0		0.08
15	570	8550	0.0449598		0.07
14.99	859	12876.4	0.0677552		0.06
14.98	229	3430.42	0.0180628		0.05
14.97	183	2739.51	0.0144345		0.04
14.96	508	7599.68	0.0400694		0.03
14.95	88	1315.6	0.00694116		0.02
14.94	4	59.76	0.000315507		0.01
14.93	993	14825.5	0.0783247		0
14.92	185	2760.2	0.0145922		-0.01
14.91	175	2609.25	0.0138034		-0.02
14.9	559	8329.1	0.0440921		-0.03
14.89	104	1548.56	0.00820319		-0.04
14.88	197	2931.36	0.0155387		-0.05
14.87	0	0	0		-0.06
14.86	323	4799.78	0.0254772		-0.07
14.85	774	11493.9	0.0610506		-0.08
14.84	50	742	0.00394384		-0.09
14.83	103	1527.49	0.00812431		-0.1
14.82	120	1778.4	0.00946522		-0.11
14.81	0	0	0		-0.12
14.8	3259	48233.2	0.257059		-0.13
14.79	451	6670.29	0.0355734		-0.14
14.78	55	812.9	0.00433822		-0.15
14.77	0	0	0		-0.16
14.76	160	2361.6	0.0126203		-0.17
14.75	3	44.25	0.00023663		-0.18
	12678	14.9264
