# Supplementary material for: Interaction Wave Functions and Interaction-Based Coherence and Entanglement in Complex Adaptive Systems
Source: Research Square preprint supplement (doi:10.21203/rs.3.rs-6846233/v1), 2025-06-16
Supplement: Supplementary file 516 [file 30626.xls]

## Sheet: Sheet1
14.92	130	1939.6	0.0271059		0.09
14.91	0	0	0		0.08
14.9	147	2190.3	0.0306505		0.07
14.89	230	3424.7	0.0479566		0.06
14.88	290	4315.2	0.0604671		0.05
14.87	114	1695.18	0.0237698		0.04
14.86	355	5275.3	0.07402		0.03
14.85	623	9251.55	0.1299		0.02
14.84	365	5416.6	0.0761051		0.01
14.83	252	3737.16	0.0525438		0
14.82	654	9692.28	0.136364		-0.01
14.81	130	1925.3	0.0271059		-0.02
14.8	606	8968.8	0.126355		-0.03
14.79	182	2691.78	0.0379483		-0.04
14.78	349	5158.22	0.072769		-0.05
14.77	0	0	0		-0.06
14.76	152	2243.52	0.0316931		-0.07
14.75	29	427.75	0.00604671		-0.08
14.74	0	0	0		-0.09
14.73	181	2666.13	0.0377398		-0.1
14.72	7	103.04	0.00145955		-0.11
	4796	14.8295
