# Supplementary material for: Interaction Wave Functions and Interaction-Based Coherence and Entanglement in Complex Adaptive Systems
Source: Research Square preprint supplement (doi:10.21203/rs.3.rs-6846233/v1), 2025-06-16
Supplement: Supplementary file 517 [file 30627.xls]

## Sheet: Sheet1
14.81	34	503.54	0.0100088		0.05
14.8	520	7696	0.153076		0.04
14.79	173	2558.67	0.0509273		0.03
14.78	522	7715.16	0.153665		0.02
14.77	202	2983.54	0.0594642		0.01
14.76	539	7955.64	0.158669		0
14.75	864	12744	0.254342		-0.01
14.74	0	0	0		-0.02
14.73	278	4094.94	0.0818369		-0.03
14.72	0	0	0		-0.04
14.71	5	73.55	0.00147189		-0.05
14.7	141	2072.7	0.0415072		-0.06
14.69	0	0	0		-0.07
14.68	0	0	0		-0.08
14.67	0	0	0		-0.09
14.66	0	0	0		-0.1
14.65	0	0	0		-0.11
14.64	0	0	0		-0.12
14.63	0	0	0		-0.13
14.62	0	0	0		-0.14
14.61	0	0	0		-0.15
14.6	0	0	0		-0.16
14.59	0	0	0		-0.17
14.58	0	0	0		-0.18
14.57	0	0	0		-0.19
14.56	0	0	0		-0.2
14.55	119	1731.45	0.0350309		-0.21
	3397	14.7569
