# Supplementary material for: Interaction Wave Functions and Interaction-Based Coherence and Entanglement in Complex Adaptive Systems
Source: Research Square preprint supplement (doi:10.21203/rs.3.rs-6846233/v1), 2025-06-16
Supplement: Supplementary file 518 [file 30630.xls]

## Sheet: Sheet1
15.03	13	195.39	0.00392275		0.19
15.02	0	0	0		0.18
15.01	0	0	0		0.17
15	437	6555	0.131865		0.16
14.99	0	0	0		0.15
14.98	219	3280.62	0.0660833		0.14
14.97	47	703.59	0.0141823		0.13
14.96	4	59.84	0.001207		0.12
14.95	61	911.95	0.0184068		0.11
14.94	0	0	0		0.1
14.93	45	671.85	0.0135788		0.09
14.92	0	0	0		0.08
14.91	0	0	0		0.07
14.9	220	3278	0.066385		0.06
14.89	100	1489	0.030175		0.05
14.88	1	14.88	0.00030175		0.04
14.87	0	0	0		0.03
14.86	119	1768.34	0.0359083		0.02
14.85	378	5613.3	0.114062		0.01
14.84	0	0	0		0
14.83	0	0	0		-0.01
14.82	272	4031.04	0.082076		-0.02
14.81	104	1540.24	0.031382		-0.03
14.8	109	1613.2	0.0328908		-0.04
14.79	0	0	0		-0.05
14.78	330	4877.4	0.0995775		-0.06
14.77	0	0	0		-0.07
14.76	101	1490.76	0.0304768		-0.08
14.75	176	2596	0.053108		-0.09
14.74	28	412.72	0.008449		-0.1
14.73	45	662.85	0.0135788		-0.11
14.72	79	1162.88	0.0238383		-0.12
14.71	0	0	0		-0.13
14.7	345	5071.5	0.104104		-0.14
14.69	23	337.87	0.00694025		-0.15
14.68	58	851.44	0.0175015		-0.16
	3314	14.843
