# Supplementary material for: Interaction Wave Functions and Interaction-Based Coherence and Entanglement in Complex Adaptive Systems
Source: Research Square preprint supplement (doi:10.21203/rs.3.rs-6846233/v1), 2025-06-16
Supplement: Supplementary file 519 [file 30602-06.xls]

## Sheet: Sheet1
0.15		15				15	2.25	0.000486681
0.14		18		24		42	5.88	0.00136271
0.13		2		0		2	0.26	6.48908e-05
0.12		182		0		182	21.84	0.00590506
0.11		94		0	5	99	10.89	0.0032121
0.1	14	0		64	0	78	7.8	0.00253074
0.09	47	19	30	256	0	352	31.68	0.0114208
0.08	334	177	364	249	51	1175	94	0.0381234
0.07	17	83	172	198	467	937	65.59	0.0304013
0.06	142	111	401	137	117	908	54.48	0.0294604
0.05	267	259	205	10	181	922	46.1	0.0299147
0.04	678	582	126	453	141	1980	79.2	0.0642419
0.03	929	241	176	412	261	2019	60.57	0.0655073
0.02	258	873	178	560	546	2415	48.3	0.0783557
0.01	394	712	432	748	412	2698	26.98	0.0875377
0	343	73	442	764	243	1865	0	0.0605107
-0.01	372	879	845	594	231	2921	-29.21	0.094773
-0.02	592	740	1355	111	62	2860	-57.2	0.0927939
-0.03	448	892	180	238	698	2456	-73.68	0.0796859
-0.04	803	544	288	202	161	1998	-79.92	0.0648259
-0.05	409	128	35	533	322	1427	-71.35	0.0462996
-0.06	633	221	269	394	90	1607	-96.42	0.0521398
-0.07	358	289	56	9	330	1042	-72.94	0.0338081
-0.08	73	253		144	263	733	-58.64	0.0237825
-0.09		22		66		88	-7.92	0.0028552
						30821	0.000277084
