# Supplementary material for: Interaction Wave Functions and Interaction-Based Coherence and Entanglement in Complex Adaptive Systems
Source: Research Square preprint supplement (doi:10.21203/rs.3.rs-6846233/v1), 2025-06-16
Supplement: Supplementary file 520 [file 30602.xls]

## Sheet: Sheet1
9.12	14	127.68	0.00196878		0.1
9.11	47	428.17	0.00660948		0.09
9.1	334	3039.4	0.0469695		0.08
9.09	17	154.53	0.00239066		0.07
9.08	142	1289.36	0.0199691		0.06
9.07	267	2421.69	0.0375475		0.05
9.06	678	6142.68	0.0953452		0.04
9.05	929	8407.45	0.130643		0.03
9.04	258	2332.32	0.0362818		0.02
9.03	394	3557.82	0.0554071		0.01
9.02	343	3093.86	0.0482351		0
9.01	372	3351.72	0.0523133		-0.01
9	592	5328	0.0832513		-0.02
8.99	448	4027.52	0.063001		-0.03
8.98	803	7210.94	0.112924		-0.04
8.97	409	3668.73	0.0575165		-0.05
8.96	633	5671.68	0.089017		-0.06
8.95	358	3204.1	0.0503445		-0.07
8.94	73	652.62	0.0102658		-0.08
	7111	9.01565
