# Supplementary material for: Interaction Wave Functions and Interaction-Based Coherence and Entanglement in Complex Adaptive Systems
Source: Research Square preprint supplement (doi:10.21203/rs.3.rs-6846233/v1), 2025-06-16
Supplement: Supplementary file 521 [file 30603.xls]

## Sheet: Sheet1
9.04	15	135.6	0.00202456		0.15
9.03	18	162.54	0.00242948		0.14
9.02	2	18.04	0.000269942		0.13
9.01	182	1639.82	0.0245647		0.12
9	94	846	0.0126873		0.11
8.99	0	0	0		0.1
8.98	19	170.62	0.00256445		0.09
8.97	177	1587.69	0.0238899		0.08
8.96	83	743.68	0.0112026		0.07
8.95	111	993.45	0.0149818		0.06
8.94	259	2315.46	0.0349575		0.05
8.93	582	5197.26	0.0785531		0.04
8.92	241	2149.72	0.032528		0.03
8.91	873	7778.43	0.11783		0.02
8.9	712	6336.8	0.0960993		0.01
8.89	73	648.97	0.00985288		0
8.88	879	7805.52	0.118639		-0.01
8.87	740	6563.8	0.0998785		-0.02
8.86	892	7903.12	0.120394		-0.03
8.85	544	4814.4	0.0734242		-0.04
8.84	128	1131.52	0.0172763		-0.05
8.83	221	1951.43	0.0298286		-0.06
8.82	289	2548.98	0.0390066		-0.07
8.81	253	2228.93	0.0341477		-0.08
8.8	22	193.6	0.00296936		-0.09
	7409	8.88991
