# Supplementary material for: Interaction Wave Functions and Interaction-Based Coherence and Entanglement in Complex Adaptive Systems
Source: Research Square preprint supplement (doi:10.21203/rs.3.rs-6846233/v1), 2025-06-16
Supplement: Supplementary file 522 [file 30604.xls]

## Sheet: Sheet1
8.91	30	267.3	0.00540151		0.09
8.9	364	3239.6	0.0655384		0.08
8.89	172	1529.08	0.0309687		0.07
8.88	401	3560.88	0.0722002		0.06
8.87	205	1818.35	0.0369103		0.05
8.86	126	1116.36	0.0226864		0.04
8.85	176	1557.6	0.0316889		0.03
8.84	178	1573.52	0.032049		0.02
8.83	432	3814.56	0.0777818		0.01
8.82	442	3898.44	0.0795823		0
8.81	845	7444.45	0.152143		-0.01
8.8	1355	11924	0.243968		-0.02
8.79	180	1582.2	0.0324091		-0.03
8.78	288	2528.64	0.0518545		-0.04
8.77	35	306.95	0.00630176		-0.05
8.76	269	2356.44	0.0484336		-0.06
8.75	56	490	0.0100828		-0.07
	5554	8.82398
