# Supplementary material for: Interaction Wave Functions and Interaction-Based Coherence and Entanglement in Complex Adaptive Systems
Source: Research Square preprint supplement (doi:10.21203/rs.3.rs-6846233/v1), 2025-06-16
Supplement: Supplementary file 523 [file 30605.xls]

## Sheet: Sheet1
8.9	24	213.6	0.00389231		0.14
8.89	0	0	0		0.13
8.88	0	0	0		0.12
8.87	0	0	0		0.11
8.86	64	567.04	0.0103795		0.1
8.85	256	2265.6	0.041518		0.09
8.84	249	2201.16	0.0403827		0.08
8.83	198	1748.34	0.0321116		0.07
8.82	137	1208.34	0.0222186		0.06
8.81	10	88.1	0.0016218		0.05
8.8	453	3986.4	0.0734674		0.04
8.79	412	3621.48	0.066818		0.03
8.78	560	4916.8	0.0908206		0.02
8.77	748	6559.96	0.12131		0.01
8.76	764	6692.64	0.123905		0
8.75	594	5197.5	0.0963347		-0.01
8.74	111	970.14	0.0180019		-0.02
8.73	238	2077.74	0.0385988		-0.03
8.72	202	1761.44	0.0327603		-0.04
8.71	533	4642.43	0.0864418		-0.05
8.7	394	3427.8	0.0638988		-0.06
8.69	9	78.21	0.00145962		-0.07
8.68	144	1249.92	0.0233539		-0.08
8.67	66	572.22	0.0107039		-0.09
	6166	8.7653
