# Supplementary material for: Interaction Wave Functions and Interaction-Based Coherence and Entanglement in Complex Adaptive Systems
Source: Research Square preprint supplement (doi:10.21203/rs.3.rs-6846233/v1), 2025-06-16
Supplement: Supplementary file 524 [file 30606.xls]

## Sheet: Sheet1
8.79	5	43.95	0.00109146		0.11
8.78	0	0	0		0.1
8.77	0	0	0		0.09
8.76	51	446.76	0.0111329		0.08
8.75	467	4086.25	0.101943		0.07
8.74	117	1022.58	0.0255403		0.06
8.73	181	1580.13	0.039511		0.05
8.72	141	1229.52	0.0307793		0.04
8.71	261	2273.31	0.0569745		0.03
8.7	546	4750.2	0.119188		0.02
8.69	412	3580.28	0.0899367		0.01
8.68	243	2109.24	0.0530452		0
8.67	231	2002.77	0.0504257		-0.01
8.66	62	536.92	0.0135342		-0.02
8.65	698	6037.7	0.152368		-0.03
8.64	161	1391.04	0.0351452		-0.04
8.63	322	2778.86	0.0702903		-0.05
8.62	90	775.8	0.0196464		-0.06
8.61	330	2841.3	0.0720367		-0.07
8.6	263	2261.8	0.057411		-0.08
	4581	8.6768
