# Supplementary material for: Interaction Wave Functions and Interaction-Based Coherence and Entanglement in Complex Adaptive Systems
Source: Research Square preprint supplement (doi:10.21203/rs.3.rs-6846233/v1), 2025-06-16
Supplement: Supplementary file 525 [file 30609-13.xls]

## Sheet: Sheet1
0.12				49		49	5.88	0.0030995
0.11				27		27	2.97	0.00170789
0.1				29		29	2.9	0.0018344
0.09				166		166	14.94	0.0105003
0.08				39		39	3.12	0.00246695
0.07				153	95	248	17.36	0.0156873
0.06		10		70	148	228	13.68	0.0144222
0.05		0		221	228	449	22.45	0.0284015
0.04	190	0	68	358	95	711	28.44	0.0449744
0.03	95	68	83	335	160	741	22.23	0.046872
0.02	139	571	461	663	79	1913	38.26	0.121007
0.01	137	317	499	307	399	1659	16.59	0.10494
0	868	519	225	252	508	2372	0	0.150041
-0.01	560	380	276	273	507	1996	-19.96	0.126257
-0.02	309	188	174	258	388	1317	-26.34	0.083307
-0.03	184	301	237	652	244	1618	-48.54	0.102347
-0.04	152	56	299	340	249	1096	-43.84	0.0693276
-0.05	90	49	1	721	200	1061	-53.05	0.0671137
-0.06		0	0			0	0	0
-0.07		22	0			22	-1.54	0.00139161
-0.08			59			59	-4.72	0.00373205
-0.09			9			9	-0.81	0.000569296
						15809	-0.000631286
