# Supplementary material for: Interaction Wave Functions and Interaction-Based Coherence and Entanglement in Complex Adaptive Systems
Source: Research Square preprint supplement (doi:10.21203/rs.3.rs-6846233/v1), 2025-06-16
Supplement: Supplementary file 526 [file 30609.xls]

## Sheet: Sheet1
8.64	190	1641.6	0.0697504		0.04
8.63	95	819.85	0.0348752		0.03
8.62	139	1198.18	0.0510279		0.02
8.61	137	1179.57	0.0502937		0.01
8.6	868	7464.8	0.318649		0
8.59	560	4810.4	0.20558		-0.01
8.58	309	2651.22	0.113436		-0.02
8.57	184	1576.88	0.0675477		-0.03
8.56	152	1301.12	0.0558003		-0.04
8.55	90	769.5	0.0330396		-0.05
	2724	8.59512
