# Supplementary material for: Interaction Wave Functions and Interaction-Based Coherence and Entanglement in Complex Adaptive Systems
Source: Research Square preprint supplement (doi:10.21203/rs.3.rs-6846233/v1), 2025-06-16
Supplement: Supplementary file 527 [file 30610.xls]

## Sheet: Sheet1
8.69	10	86.9	0.00403063		0.06
8.68	0	0	0		0.05
8.67	0	0	0		0.04
8.66	68	588.88	0.0274083		0.03
8.65	571	4939.15	0.230149		0.02
8.64	317	2738.88	0.127771		0.01
8.63	519	4478.97	0.20919		0
8.62	380	3275.6	0.153164		-0.01
8.61	188	1618.68	0.0757759		-0.02
8.6	301	2588.6	0.121322		-0.03
8.59	56	481.04	0.0225715		-0.04
8.58	49	420.42	0.0197501		-0.05
8.57	0	0	0		-0.06
8.56	22	188.32	0.00886739		-0.07
	2481	8.62775
