# Supplementary material for: Interaction Wave Functions and Interaction-Based Coherence and Entanglement in Complex Adaptive Systems
Source: Research Square preprint supplement (doi:10.21203/rs.3.rs-6846233/v1), 2025-06-16
Supplement: Supplementary file 528 [file 30611.xls]

## Sheet: Sheet1
8.78	68	597.04	0.02844		0.04
8.77	83	727.91	0.0347135		0.03
8.76	461	4038.36	0.192806		0.02
8.75	499	4366.25	0.208699		0.01
8.74	225	1966.5	0.0941029		0
8.73	276	2409.48	0.115433		-0.01
8.72	174	1517.28	0.0727729		-0.02
8.71	237	2064.27	0.0991217		-0.03
8.7	299	2601.3	0.125052		-0.04
8.69	1	8.69	0.000418235		-0.05
8.68	0	0	0		-0.06
8.67	0	0	0		-0.07
8.66	59	510.94	0.0246759		-0.08
8.65	9	77.85	0.00376412		-0.09
	2391	8.7352
