# Supplementary material for: Interaction Wave Functions and Interaction-Based Coherence and Entanglement in Complex Adaptive Systems
Source: Research Square preprint supplement (doi:10.21203/rs.3.rs-6846233/v1), 2025-06-16
Supplement: Supplementary file 529 [file 30612.xls]

## Sheet: Sheet1
8.75	49	428.75	0.00997354		0.12
8.74	27	235.98	0.00549562		0.11
8.73	29	253.17	0.00590271		0.1
8.72	166	1447.52	0.0337879		0.09
8.71	39	339.69	0.00793812		0.08
8.7	153	1331.1	0.0311419		0.07
8.69	70	608.3	0.0142479		0.06
8.68	221	1918.28	0.0449827		0.05
8.67	358	3103.86	0.0728679		0.04
8.66	335	2901.1	0.0681864		0.03
8.65	663	5734.95	0.134948		0.02
8.64	307	2652.48	0.0624873		0.01
8.63	252	2174.76	0.0512925		0
8.62	273	2353.26	0.0555669		-0.01
8.61	258	2221.38	0.0525137		-0.02
8.6	652	5607.2	0.132709		-0.03
8.59	340	2920.6	0.0692042		-0.04
8.58	721	6186.18	0.146754		-0.05
	4913	8.63394
