# Supplementary material for: Interaction Wave Functions and Interaction-Based Coherence and Entanglement in Complex Adaptive Systems
Source: Research Square preprint supplement (doi:10.21203/rs.3.rs-6846233/v1), 2025-06-16
Supplement: Supplementary file 530 [file 30613.xls]

## Sheet: Sheet1
8.72	95	828.4	0.0287879		0.07
8.71	148	1289.08	0.0448485		0.06
8.7	228	1983.6	0.0690909		0.05
8.69	95	825.55	0.0287879		0.04
8.68	160	1388.8	0.0484848		0.03
8.67	79	684.93	0.0239394		0.02
8.66	399	3455.34	0.120909		0.01
8.65	508	4394.2	0.153939		0
8.64	507	4380.48	0.153636		-0.01
8.63	388	3348.44	0.117576		-0.02
8.62	244	2103.28	0.0739394		-0.03
8.61	249	2143.89	0.0754545		-0.04
8.6	200	1720	0.0606061		-0.05
	3300	8.6503
