# Supplementary material for: Interaction Wave Functions and Interaction-Based Coherence and Entanglement in Complex Adaptive Systems
Source: Research Square preprint supplement (doi:10.21203/rs.3.rs-6846233/v1), 2025-06-16
Supplement: Supplementary file 531 [file 30616-20.xls]

## Sheet: Sheet1
0.17	59					59	10.03
0.16	57					57	9.12	0.00277076
0.15	0					0	0	0
0.14	30					30	4.2	0.00145829
0.13	62					62	8.06	0.00301381
0.12	234					234	28.08	0.0113747
0.11	242					242	26.62	0.0117636
0.1	159			44		203	20.3	0.00986778
0.09	77			33		110	9.9	0.00534707
0.08	87			0		87	6.96	0.00422905
0.07	0			49		49	3.43	0.00238188
0.06	46	3		52		101	6.06	0.00490959
0.05	19	301		28	17	365	18.25	0.0177426
0.04	115	199	27	211	236	788	31.52	0.0383045
0.03	186	318	851	204	200	1759	52.77	0.0855046
0.02	249	25	753	323	494	1844	36.88	0.0896364
0.01	121	299	232	230	523	1405	14.05	0.0682967
0	536	446	380	109	256	1727	0	0.0839491
-0.01	939	466	191	454	475	2525	-25.25	0.12274
-0.02	2746	282	157	299	494	3978	-79.56	0.19337
-0.03	920	116	138	290	332	1796	-53.88	0.0873031
-0.04	382	318	0	511	12	1223	-48.92	0.0594497
-0.05	632	16	52	244		944	-47.2	0.0458876
-0.06	225		174	440		839	-50.34	0.0407836
-0.07			145			145	-10.15	0.00704842
						20572	-0.00141309
