# Supplementary material for: Interaction Wave Functions and Interaction-Based Coherence and Entanglement in Complex Adaptive Systems
Source: Research Square preprint supplement (doi:10.21203/rs.3.rs-6846233/v1), 2025-06-16
Supplement: Supplementary file 532 [file 30616.xls]

## Sheet: Sheet1
8.64	59	509.76	0.00726333		0.17
8.63	57	491.91	0.00701711		0.16
8.62	0	0	0		0.15
8.61	30	258.3	0.00369322		0.14
8.6	62	533.2	0.00763265		0.13
8.59	234	2010.06	0.0288071		0.12
8.58	242	2076.36	0.0297919		0.11
8.57	159	1362.63	0.019574		0.1
8.56	77	659.12	0.00947926		0.09
8.55	87	743.85	0.0107103		0.08
8.54	0	0	0		0.07
8.53	46	392.38	0.00566293		0.06
8.52	19	161.88	0.00233904		0.05
8.51	115	978.65	0.0141573		0.04
8.5	186	1581	0.0228979		0.03
8.49	249	2114.01	0.0306537		0.02
8.48	121	1026.08	0.014896		0.01
8.47	536	4539.92	0.0659855		0
8.46	939	7943.94	0.115598		-0.01
8.45	2746	23203.7	0.338052		-0.02
8.44	920	7764.8	0.113259		-0.03
8.43	382	3220.26	0.047027		-0.04
8.42	632	5321.44	0.0778038		-0.05
8.41	225	1892.25	0.0276991		-0.06
	8123	8.46799
