# Supplementary material for: Interaction Wave Functions and Interaction-Based Coherence and Entanglement in Complex Adaptive Systems
Source: Research Square preprint supplement (doi:10.21203/rs.3.rs-6846233/v1), 2025-06-16
Supplement: Supplementary file 533 [file 30617.xls]

## Sheet: Sheet1
8.53	3	25.59	0.00107565		0.06
8.52	301	2564.52	0.107924		0.05
8.51	199	1693.49	0.0713517		0.04
8.5	318	2703	0.114019		0.03
8.49	25	212.25	0.00896379		0.02
8.48	299	2535.52	0.107207		0.01
8.47	446	3777.62	0.159914		0
8.46	466	3942.36	0.167085		-0.01
8.45	282	2382.9	0.101112		-0.02
8.44	116	979.04	0.041592		-0.03
8.43	318	2680.74	0.114019		-0.04
8.42	16	134.72	0.00573682		-0.05
	2789	8.4732
