# Supplementary material for: Interaction Wave Functions and Interaction-Based Coherence and Entanglement in Complex Adaptive Systems
Source: Research Square preprint supplement (doi:10.21203/rs.3.rs-6846233/v1), 2025-06-16
Supplement: Supplementary file 534 [file 30618.xls]

## Sheet: Sheet1
8.51	27	229.77	0.00870968		0.04
8.5	851	7233.5	0.274516		0.03
8.49	753	6392.97	0.242903		0.02
8.48	232	1967.36	0.0748387		0.01
8.47	380	3218.6	0.122581		0
8.46	191	1615.86	0.0616129		-0.01
8.45	157	1326.65	0.0506452		-0.02
8.44	138	1164.72	0.0445161		-0.03
8.43	0	0	0		-0.04
8.42	52	437.84	0.0167742		-0.05
8.41	174	1463.34	0.056129		-0.06
8.4	145	1218	0.0467742		-0.07
	3100	8.47375
