# Supplementary material for: Interaction Wave Functions and Interaction-Based Coherence and Entanglement in Complex Adaptive Systems
Source: Research Square preprint supplement (doi:10.21203/rs.3.rs-6846233/v1), 2025-06-16
Supplement: Supplementary file 535 [file 30619.xls]

## Sheet: Sheet1
8.49	44	373.56	0.0124964		0.1
8.48	33	279.84	0.00937234		0.09
8.47	0	0	0		0.08
8.46	49	414.54	0.0139165		0.07
8.45	52	439.4	0.0147685		0.06
8.44	28	236.32	0.00795229		0.05
8.43	211	1778.73	0.0599262		0.04
8.42	204	1717.68	0.0579381		0.03
8.41	323	2716.43	0.0917353		0.02
8.4	230	1932	0.0653224		0.01
8.39	109	914.51	0.0309571		0
8.38	454	3804.52	0.128941		-0.01
8.37	299	2502.63	0.0849191		-0.02
8.36	290	2424.4	0.082363		-0.03
8.35	511	4266.85	0.145129		-0.04
8.34	244	2034.96	0.0692985		-0.05
8.33	440	3665.2	0.124964		-0.06
	3521	8.37875
