# Supplementary material for: Interaction Wave Functions and Interaction-Based Coherence and Entanglement in Complex Adaptive Systems
Source: Research Square preprint supplement (doi:10.21203/rs.3.rs-6846233/v1), 2025-06-16
Supplement: Supplementary file 536 [file 30620.xls]

## Sheet: Sheet1
8.39	17	142.63	0.00559395		0.05
8.38	236	1977.68	0.0776571		0.04
8.37	200	1674	0.0658111		0.03
8.36	494	4129.84	0.162553		0.02
8.35	523	4367.05	0.172096		0.01
8.34	256	2135.04	0.0842382		0
8.33	475	3956.75	0.156301		-0.01
8.32	494	4110.08	0.162553		-0.02
8.31	332	2758.92	0.109246		-0.03
8.3	12	99.6	0.00394867		-0.04
	3039	8.34208
