# Supplementary material for: Interaction Wave Functions and Interaction-Based Coherence and Entanglement in Complex Adaptive Systems
Source: Research Square preprint supplement (doi:10.21203/rs.3.rs-6846233/v1), 2025-06-16
Supplement: Supplementary file 537 [file 30623-27.xls]

## Sheet: Sheet1
0.17				5		5		0.000556297
0.16				0		0		0
0.15				0		0		0
0.14				19		19		0.00211393
0.13				30		30		0.00333778
0.12				183		183		0.0203605
0.11				64		64		0.00712061
0.1				41		41		0.00456164
0.09			77	133		210		0.0233645
0.08			5	63		68		0.00756564
0.07			44	165		209		0.0232532
0.06		48	10	160		218		0.0242546
0.05	13	101	94	229		437		0.0486204
0.04	54	129	37	22		242		0.0269248
0.03	57	18	65	60		200		0.0222519
0.02	145	19	80	75		319		0.0354918
0.01	845	284	156	65		1350		0.1502
0	254	320	318	125		1017		0.113151
-0.01	447	116	827	78		1468		0.163329
-0.02	228	197	84	277		786		0.0874499
-0.03	212	220	132	271		835		0.0929016
-0.04		129	77	58		264		0.0293725
-0.05			44	111		155		0.0172452
-0.06				450		450		0.0500668
-0.07				387		387		0.0430574
-0.08				31		31		0.00344904
						8988
