# Supplementary material for: Interaction Wave Functions and Interaction-Based Coherence and Entanglement in Complex Adaptive Systems
Source: Research Square preprint supplement (doi:10.21203/rs.3.rs-6846233/v1), 2025-06-16
Supplement: Supplementary file 538 [file 30623.xls]

## Sheet: Sheet1
8.34	13	108.42	0.00576497		0.05
8.33	54	449.82	0.0239468		0.04
8.32	57	474.24	0.0252772		0.03
8.31	145	1204.95	0.0643016		0.02
8.3	845	7013.5	0.374723		0.01
8.29	254	2105.66	0.112639		0
8.28	447	3701.16	0.198226		-0.01
8.27	228	1885.56	0.101109		-0.02
8.26	212	1751.12	0.0940133		-0.03
	2255	8.29021
