# Supplementary material for: Interaction Wave Functions and Interaction-Based Coherence and Entanglement in Complex Adaptive Systems
Source: Research Square preprint supplement (doi:10.21203/rs.3.rs-6846233/v1), 2025-06-16
Supplement: Supplementary file 539 [file 30624.xls]

## Sheet: Sheet1
8.4	48	403.2	0.0303605		0.06
8.39	101	847.39	0.0638836		0.05
8.38	129	1081.02	0.0815939		0.04
8.37	18	150.66	0.0113852		0.03
8.36	19	158.84	0.0120177		0.02
8.35	284	2371.4	0.179633		0.01
8.34	320	2668.8	0.202404		0
8.33	116	966.28	0.0733713		-0.01
8.32	197	1639.04	0.124605		-0.02
8.31	220	1828.2	0.139152		-0.03
8.3	129	1070.7	0.0815939		-0.04
	1581	8.33999
