# Supplementary material for: Interaction Wave Functions and Interaction-Based Coherence and Entanglement in Complex Adaptive Systems
Source: Research Square preprint supplement (doi:10.21203/rs.3.rs-6846233/v1), 2025-06-16
Supplement: Supplementary file 540 [file 30625.xls]

## Sheet: Sheet1
8.4	77	646.8	0.037561		0.09
8.39	5	41.95	0.00243902		0.08
8.38	44	368.72	0.0214634		0.07
8.37	10	83.7	0.00487805		0.06
8.36	94	785.84	0.0458537		0.05
8.35	37	308.95	0.0180488		0.04
8.34	65	542.1	0.0317073		0.03
8.33	80	666.4	0.0390244		0.02
8.32	156	1297.92	0.0760976		0.01
8.31	318	2642.58	0.155122		0
8.3	827	6864.1	0.403415		-0.01
8.29	84	696.36	0.0409756		-0.02
8.28	132	1092.96	0.0643902		-0.03
8.27	77	636.79	0.037561		-0.04
8.26	44	363.44	0.0214634		-0.05
	2050	8.31152
