# Supplementary material for: Interaction Wave Functions and Interaction-Based Coherence and Entanglement in Complex Adaptive Systems
Source: Research Square preprint supplement (doi:10.21203/rs.3.rs-6846233/v1), 2025-06-16
Supplement: Supplementary file 541 [file 30626.xls]

## Sheet: Sheet1
8.45	5	42.25	0.00161186		0.17
8.44	0	0	0		0.16
8.43	0	0	0		0.15
8.42	19	159.98	0.00612508		0.14
8.41	30	252.3	0.00967118		0.13
8.4	183	1537.2	0.0589942		0.12
8.39	64	536.96	0.0206319		0.11
8.38	41	343.58	0.0132173		0.1
8.37	133	1113.21	0.0428756		0.09
8.36	63	526.68	0.0203095		0.08
8.35	165	1377.75	0.0531915		0.07
8.34	160	1334.4	0.0515796		0.06
8.33	229	1907.57	0.0738233		0.05
8.32	22	183.04	0.0070922		0.04
8.31	60	498.6	0.0193424		0.03
8.3	75	622.5	0.0241779		0.02
8.29	65	538.85	0.0209542		0.01
8.28	125	1035	0.0402966		0
8.27	78	645.06	0.0251451		-0.01
8.26	277	2288.02	0.0892972		-0.02
8.25	271	2235.75	0.087363		-0.03
8.24	58	477.92	0.0186976		-0.04
8.23	111	913.53	0.0357834		-0.05
8.22	450	3699	0.145068		-0.06
8.21	387	3177.27	0.124758		-0.07
8.2	31	254.2	0.00999355		-0.08
	3102	8.28518
