# Supplementary material for: Interaction Wave Functions and Interaction-Based Coherence and Entanglement in Complex Adaptive Systems
Source: Research Square preprint supplement (doi:10.21203/rs.3.rs-6846233/v1), 2025-06-16
Supplement: Supplementary file 542 [file 30630.xls]

## Sheet: Sheet1
8.29	5	41.45	0.00135318		0.14
8.28	0	0	0		0.13
8.27	0	0	0		0.12
8.26	0	0	0		0.11
8.25	10	82.5	0.00270636		0.1
8.24	0	0	0		0.09
8.23	0	0	0		0.08
8.22	0	0	0		0.07
8.21	0	0	0		0.06
8.2	240	1968	0.0649526		0.05
8.19	10	81.9	0.00270636		0.04
8.18	769	6290.42	0.208119		0.03
8.17	0	0	0		0.02
8.16	150	1224	0.0405954		0.01
8.15	400	3260	0.108254		0
8.14	418	3402.52	0.113126		-0.01
8.13	885	7195.05	0.239513		-0.02
8.12	573	4652.76	0.155074		-0.03
8.11	132	1070.52	0.035724		-0.04
8.1	103	834.3	0.0278755		-0.05
	3695	8.14707
