# Supplementary material for: Interaction Wave Functions and Interaction-Based Coherence and Entanglement in Complex Adaptive Systems
Source: Research Square preprint supplement (doi:10.21203/rs.3.rs-6846233/v1), 2025-06-16
Supplement: Supplementary file 543 [file 30602-06.xls]

## Sheet: Sheet1
0.17	740					740	125.8	0.0036327
0.16	3260					3260	521.6	0.0160035
0.15	1535			202		1737	260.55	0.00852704
0.14	2141			139		2280	319.2	0.0111927
0.13	1290	153		253		1696	220.48	0.00832577
0.12	1449	114		37		1600	192	0.0078545
0.11	3547	262		15		3824	420.64	0.0187722
0.1	3277	839		47		4163	416.3	0.0204364
0.09	7379	445	565	332	454	9175	825.75	0.0450406
0.08	1655	349	706	517	469	3696	295.68	0.0181439
0.07	1752	723	824	898	354	4551	318.57	0.0223411
0.06	792	1836	399	1200	868	5095	305.7	0.0250117
0.05	1482	622	1507	1254	506	5371	268.55	0.0263666
0.04	1786	1842	3056	1201	1319	9204	368.16	0.045183
0.03	1470	2283	2085	1269	3717	10824	324.72	0.0531357
0.02	2169	423	2728	1880	2326	9526	190.52	0.0467637
0.01	1395	374	5121	966	2374	10230	102.3	0.0502197
0	2415	7009	3508	1753	1908	16593	0	0.081456
-0.01	1621	2431	5271	1710	2606	13639	-136.39	0.0669547
-0.02	917	9270	1196	3253	3139	17775	-355.5	0.0872585
-0.03	1460	6708	2105	3261	2052	15586	-467.58	0.0765126
-0.04	171	1236	341	2578	1374	5700	-228	0.0279816
-0.05	1077		657	2218	923	4875	-243.75	0.0239317
-0.06	2839		692	2732	937	7200	-432	0.0353452
-0.07	2384		1608			3992	-279.44	0.019597
-0.08	2994		1861			4855	-388.4	0.0238335
-0.09	3487		1531			5018	-451.62	0.0246337
-0.1	4203		150			4353	-435.3	0.0213691
-0.11	4582					4582	-504.02	0.0224933
-0.12	3040					3040	-364.8	0.0149235
-0.13	7608					7608	-989.04	0.0373481
-0.14	1579					1579	-221.06	0.00775141
-0.15	338					338	-50.7	0.00165926
						203705	-0.000348936
