# Supplementary material for: Interaction Wave Functions and Interaction-Based Coherence and Entanglement in Complex Adaptive Systems
Source: Research Square preprint supplement (doi:10.21203/rs.3.rs-6846233/v1), 2025-06-16
Supplement: Supplementary file 544 [file 30602.xls]

## Sheet: Sheet1
7.18	740	5313.2	0.00950741		0.17
7.17	3260	23374.2	0.041884		0.16
7.16	1535	10990.6	0.0197215		0.15
7.15	2141	15308.2	0.0275073		0.14
7.14	1290	9210.6	0.0165737		0.13
7.13	1449	10331.4	0.0186165		0.12
7.12	3547	25254.6	0.0455713		0.11
7.11	3277	23299.5	0.0421024		0.1
7.1	7379	52390.9	0.0948043		0.09
7.09	1655	11734	0.0212632		0.08
7.08	1752	12404.2	0.0225094		0.07
7.07	792	5599.44	0.0101755		0.06
7.06	1482	10462.9	0.0190405		0.05
7.05	1786	12591.3	0.0229463		0.04
7.04	1470	10348.8	0.0188863		0.03
7.03	2169	15248.1	0.027867		0.02
7.02	1395	9792.9	0.0179228		0.01
7.01	2415	16929.2	0.0310276		0
7	1621	11347	0.0208264		-0.01
6.99	917	6409.83	0.0117815		-0.02
6.98	1460	10190.8	0.0187579		-0.03
6.97	171	1191.87	0.00219698		-0.04
6.96	1077	7495.92	0.0138371		-0.05
6.95	2839	19731.1	0.0364751		-0.06
6.94	2384	16545	0.0306293		-0.07
6.93	2994	20748.4	0.0384665		-0.08
6.92	3487	24130	0.0448005		-0.09
6.91	4203	29042.7	0.0539995		-0.1
6.9	4582	31615.8	0.0588689		-0.11
6.89	3040	20945.6	0.0390575		-0.12
6.88	7608	52343	0.0977465		-0.13
6.87	1579	10847.7	0.0202868		-0.14
6.86	338	2318.68	0.00434258		-0.15
	77834	7.00834
