# Supplementary material for: Interaction Wave Functions and Interaction-Based Coherence and Entanglement in Complex Adaptive Systems
Source: Research Square preprint supplement (doi:10.21203/rs.3.rs-6846233/v1), 2025-06-16
Supplement: Supplementary file 545 [file 30603.xls]

## Sheet: Sheet1
6.85	153	1048.05	0.00414421		0.13
6.84	114	779.76	0.00308784		0.12
6.83	262	1789.46	0.00709662		0.11
6.82	839	5721.98	0.0227254		0.1
6.81	445	3030.45	0.0120534		0.09
6.8	349	2373.2	0.00945313		0.08
6.79	723	4909.17	0.0195834		0.07
6.78	1836	12448.1	0.0497305		0.06
6.77	622	4210.94	0.0168477		0.05
6.76	1842	12451.9	0.049893		0.04
6.75	2283	15410.3	0.0618381		0.03
6.74	423	2851.02	0.0114575		0.02
6.73	374	2517.02	0.0101303		0.01
6.72	7009	47100.5	0.189848		0
6.71	2431	16312	0.0658469		-0.01
6.7	9270	62109	0.25109		-0.02
6.69	6708	44876.5	0.181695		-0.03
6.68	1236	8256.48	0.0334787		-0.04
	36919	6.72271
