# Supplementary material for: Interaction Wave Functions and Interaction-Based Coherence and Entanglement in Complex Adaptive Systems
Source: Research Square preprint supplement (doi:10.21203/rs.3.rs-6846233/v1), 2025-06-16
Supplement: Supplementary file 546 [file 30604.xls]

## Sheet: Sheet1
6.7	565	3785.5	0.0157333		0.09
6.69	706	4723.14	0.0196597		0.08
6.68	824	5504.32	0.0229456		0.07
6.67	399	2661.33	0.0111108		0.06
6.66	1507	10036.6	0.0419649		0.05
6.65	3056	20322.4	0.0850993		0.04
6.64	2085	13844.4	0.0580602		0.03
6.63	2728	18086.6	0.0759656		0.02
6.62	5121	33901	0.142603		0.01
6.61	3508	23187.9	0.0976859		0
6.6	5271	34788.6	0.14678		-0.01
6.59	1196	7881.64	0.0333046		-0.02
6.58	2105	13850.9	0.0586171		-0.03
6.57	341	2240.37	0.0094957		-0.04
6.56	657	4309.92	0.0182952		-0.05
6.55	692	4532.6	0.0192699		-0.06
6.54	1608	10516.3	0.0447774		-0.07
6.53	1861	12152.3	0.0518226		-0.08
6.52	1531	9982.12	0.0426332		-0.09
6.51	150	976.5	0.00417699		-0.1
	35911	6.60757
