# Supplementary material for: Interaction Wave Functions and Interaction-Based Coherence and Entanglement in Complex Adaptive Systems
Source: Research Square preprint supplement (doi:10.21203/rs.3.rs-6846233/v1), 2025-06-16
Supplement: Supplementary file 547 [file 30605.xls]

## Sheet: Sheet1
6.71	202	1355.42	0.00728847		0.15
6.7	139	931.3	0.00501533		0.14
6.69	253	1692.57	0.00912863		0.13
6.68	37	247.16	0.00133502		0.12
6.67	15	100.05	0.000541223		0.11
6.66	47	313.02	0.00169583		0.1
6.65	332	2207.8	0.0119791		0.09
6.64	517	3432.88	0.0186542		0.08
6.63	898	5953.74	0.0324012		0.07
6.62	1200	7944	0.0432979		0.06
6.61	1254	8288.94	0.0452463		0.05
6.6	1201	7926.6	0.0433339		0.04
6.59	1269	8362.71	0.0457875		0.03
6.58	1880	12370.4	0.0678333		0.02
6.57	966	6346.62	0.0348548		0.01
6.56	1753	11499.7	0.0632509		0
6.55	1710	11200.5	0.0616994		-0.01
6.54	3253	21274.6	0.117373		-0.02
6.53	3261	21294.3	0.117662		-0.03
6.52	2578	16808.6	0.0930182		-0.04
6.51	2218	14439.2	0.0800289		-0.05
6.5	2732	17758	0.0985748		-0.06
	27715	6.55775
