# Supplementary material for: Interaction Wave Functions and Interaction-Based Coherence and Entanglement in Complex Adaptive Systems
Source: Research Square preprint supplement (doi:10.21203/rs.3.rs-6846233/v1), 2025-06-16
Supplement: Supplementary file 548 [file 30606.xls]

## Sheet: Sheet1
6.51	454	2955.54	0.0179262		0.09
6.5	469	3048.5	0.0185185		0.08
6.49	354	2297.46	0.0139777		0.07
6.48	868	5624.64	0.0342731		0.06
6.47	506	3273.82	0.0199795		0.05
6.46	1319	8520.74	0.0520809		0.04
6.45	3717	23974.7	0.146766		0.03
6.44	2326	14979.4	0.0918424		0.02
6.43	2374	15264.8	0.0937377		0.01
6.42	1908	12249.4	0.0753376		0
6.41	2606	16704.5	0.102898		-0.01
6.4	3139	20089.6	0.123944		-0.02
6.39	2052	13112.3	0.0810235		-0.03
6.38	1374	8766.12	0.0542525		-0.04
6.37	923	5879.51	0.0364448		-0.05
6.36	937	5959.32	0.0369976		-0.06
	25326	6.42424
