# Supplementary material for: Interaction Wave Functions and Interaction-Based Coherence and Entanglement in Complex Adaptive Systems
Source: Research Square preprint supplement (doi:10.21203/rs.3.rs-6846233/v1), 2025-06-16
Supplement: Supplementary file 549 [file 30609-13.xls]

## Sheet: Sheet1
0.12			63			63	7.56	0.000733232
0.11			214			214	23.54	0.00249066
0.1			837			837	83.7	0.00974151
0.09			1774			1774	159.66	0.0206469
0.08	485		892			1377	110.16	0.0160263
0.07	342		915			1257	87.99	0.0146297
0.06	639		1569	39		2247	134.82	0.0261519
0.05	591	56	776	124		1547	77.35	0.0180049
0.04	2889	1649	1717	999		7254	290.16	0.0844264
0.03	1945	2547	853	1506		6851	205.53	0.079736
0.02	3511	3222	830	3136		10699	213.98	0.124521
0.01	1623	3174	846	2713		8356	83.56	0.0972521
0	2095	1856	2538	2228		8717	0	0.101454
-0.01	1886	147	4184	1400		7617	-76.17	0.0886512
-0.02	1829	372	989	2052		5242	-104.84	0.0610095
-0.03	1173	774	734	1530		4211	-126.33	0.0490101
-0.04	187	201	1200	1812		3400	-136	0.0395712
-0.05	838	1434	1350	905		4527	-226.35	0.0526879
-0.06	422	571	978	95		2066	-123.96	0.0240453
-0.07	0	322	896			1218	-85.26	0.0141758
-0.08	35	189	1831			2055	-164.4	0.0239173
-0.09	171	588	664			1423	-128.07	0.0165617
-0.1	112	82	456			650	-65	0.00756509
-0.11	422		143			565	-62.15	0.00657581
-0.12	848		134			982	-117.84	0.0114291
-0.13	372		330			702	-91.26	0.0081703
-0.14	51		19			70	-9.8	0.000814702
						85921	-0.000458794
