# Supplementary material for: Interaction Wave Functions and Interaction-Based Coherence and Entanglement in Complex Adaptive Systems
Source: Research Square preprint supplement (doi:10.21203/rs.3.rs-6846233/v1), 2025-06-16
Supplement: Supplementary file 550 [file 30609.xls]

## Sheet: Sheet1
6.54	485	3171.9	0.0215882		0.08
6.53	342	2233.26	0.015223		0.07
6.52	639	4166.28	0.028443		0.06
6.51	591	3847.41	0.0263064		0.05
6.5	2889	18778.5	0.128594		0.04
6.49	1945	12623.1	0.0865753		0.03
6.48	3511	22751.3	0.156281		0.02
6.47	1623	10500.8	0.0722425		0.01
6.46	2095	13533.7	0.093252		0
6.45	1886	12164.7	0.0839491		-0.01
6.44	1829	11778.8	0.0814119		-0.02
6.43	1173	7542.39	0.0522122		-0.03
6.42	187	1200.54	0.00832369		-0.04
6.41	838	5371.58	0.0373008		-0.05
6.4	422	2700.8	0.0187839		-0.06
6.39	0	0	0		-0.07
6.38	35	223.3	0.00155791		-0.08
6.37	171	1089.27	0.0076115		-0.09
6.36	112	712.32	0.00498531		-0.1
6.35	422	2679.7	0.0187839		-0.11
6.34	848	5376.32	0.0377459		-0.12
6.33	372	2354.76	0.0165584		-0.13
6.32	51	322.32	0.0022701		-0.14
	22466	6.45967
