# Supplementary material for: Interaction Wave Functions and Interaction-Based Coherence and Entanglement in Complex Adaptive Systems
Source: Research Square preprint supplement (doi:10.21203/rs.3.rs-6846233/v1), 2025-06-16
Supplement: Supplementary file 551 [file 30611.xls]

## Sheet: Sheet1
6.6	56	369.6	0.00325885		0.05
6.59	1649	10866.9	0.0959614		0.04
6.58	2547	16759.3	0.148219		0.03
6.57	3222	21168.5	0.1875		0.02
6.56	3174	20821.4	0.184707		0.01
6.55	1856	12156.8	0.108007		0
6.54	147	961.38	0.00855447		-0.01
6.53	372	2429.16	0.021648		-0.02
6.52	774	5046.48	0.0450419		-0.03
6.51	201	1308.51	0.0116969		-0.04
6.5	1434	9321	0.0834497		-0.05
6.49	571	3705.79	0.0332286		-0.06
6.48	322	2086.56	0.0187384		-0.07
6.47	189	1222.83	0.0109986		-0.08
6.46	588	3798.48	0.0342179		-0.09
6.45	82	528.9	0.00477188		-0.1
	17184	6.54979
