# Supplementary material for: Interaction Wave Functions and Interaction-Based Coherence and Entanglement in Complex Adaptive Systems
Source: Research Square preprint supplement (doi:10.21203/rs.3.rs-6846233/v1), 2025-06-16
Supplement: Supplementary file 552 [file 30612.xls]

## Sheet: Sheet1
6.78	63	427.14	0.00227174		0.12
6.77	214	1448.78	0.00771672		0.11
6.76	837	5658.12	0.0301817		0.1
6.75	1774	11974.5	0.0639694		0.09
6.74	892	6012.08	0.032165		0.08
6.73	915	6157.95	0.0329944		0.07
6.72	1569	10543.7	0.0565772		0.06
6.71	776	5206.96	0.0279821		0.05
6.7	1717	11503.9	0.061914		0.04
6.69	853	5706.57	0.0307587		0.03
6.68	830	5544.4	0.0299293		0.02
6.67	846	5642.82	0.0305063		0.01
6.66	2538	16903.1	0.0915188		0
6.65	4184	27823.6	0.150873		-0.01
6.64	989	6566.96	0.0356628		-0.02
6.63	734	4866.42	0.0264676		-0.03
6.62	1200	7944	0.0432713		-0.04
6.61	1350	8923.5	0.0486802		-0.05
6.6	978	6454.8	0.0352661		-0.06
6.59	896	5904.64	0.0323092		-0.07
6.58	1831	12048	0.0660248		-0.08
6.57	664	4362.48	0.0239435		-0.09
6.56	456	2991.36	0.0164431		-0.1
6.55	143	936.65	0.0051565		-0.11
6.54	134	876.36	0.00483196		-0.12
6.53	330	2154.9	0.0118996		-0.13
6.52	19	123.88	0.000685129		-0.14
	27732	6.66045
