# Supplementary material for: Interaction Wave Functions and Interaction-Based Coherence and Entanglement in Complex Adaptive Systems
Source: Research Square preprint supplement (doi:10.21203/rs.3.rs-6846233/v1), 2025-06-16
Supplement: Supplementary file 553 [file 30613.xls]

## Sheet: Sheet1
6.74	39	262.86	0.00210367		0.06
6.73	124	834.52	0.0066886		0.05
6.72	999	6713.28	0.0538864		0.04
6.71	1506	10105.3	0.0812342		0.03
6.7	3136	21011.2	0.169157		0.02
6.69	2713	18150	0.14634		0.01
6.68	2228	14883	0.120179		0
6.67	1400	9338	0.0755165		-0.01
6.66	2052	13666.3	0.110686		-0.02
6.65	1530	10174.5	0.0825287		-0.03
6.64	1812	12031.7	0.0977399		-0.04
6.63	905	6000.15	0.048816		-0.05
6.62	95	628.9	0.00512433		-0.06
	18539	6.6778
