# Supplementary material for: Interaction Wave Functions and Interaction-Based Coherence and Entanglement in Complex Adaptive Systems
Source: Research Square preprint supplement (doi:10.21203/rs.3.rs-6846233/v1), 2025-06-16
Supplement: Supplementary file 554 [file 30616-20.xls]

## Sheet: Sheet1
0.12	25	42				67	8.04	0.000876791
0.11	1316	234				1550	170.5	0.020284
0.1	192	412	40			644	64.4	0.00842766
0.09	230	156	140			526	47.34	0.00688347
0.08	243	114	557	161	446	1521	121.68	0.0199045
0.07	926	418	12	881	626	2863	200.41	0.0374665
0.06	318	192	301	1361	460	2632	157.92	0.0344435
0.05	835	190	547	315	338	2225	111.25	0.0291173
0.04	319	170	788	502	1144	2923	116.92	0.0382517
0.03	666	335	356	823	705	2885	86.55	0.0377544
0.02	177	2153	1121	1005	867	5323	106.46	0.0696591
0.01	155	1051	1929	2153	545	5833	58.33	0.0763332
0	284	2400	1455	1891	628	6658	0	0.0871295
-0.01	277	2998	906	1991	1625	7797	-77.97	0.102035
-0.02	1796	4476	1878	2002	423	10575	-211.5	0.138389
-0.03	1889	1215	2595	1989	1039	8727	-261.81	0.114205
-0.04	3259	89	2151	1070	480	7049	-281.96	0.0922463
-0.05	2682		26	413	1025	4146	-207.3	0.0542564
-0.06	226			756	789	1771	-106.26	0.0231761
-0.07				254	158	412	-28.84	0.00539161
-0.08					288	288	-23.04	0.00376889
						76415	0.000668979
