# Supplementary material for: Interaction Wave Functions and Interaction-Based Coherence and Entanglement in Complex Adaptive Systems
Source: Research Square preprint supplement (doi:10.21203/rs.3.rs-6846233/v1), 2025-06-16
Supplement: Supplementary file 555 [file 30616.xls]

## Sheet: Sheet1
6.77	25	169.25	0.00158078		0.12
6.76	1316	8896.16	0.0832121		0.11
6.75	192	1296	0.0121404		0.1
6.74	230	1550.2	0.0145432		0.09
6.73	243	1635.39	0.0153652		0.08
6.72	926	6222.72	0.058552		0.07
6.71	318	2133.78	0.0201075		0.06
6.7	835	5594.5	0.052798		0.05
6.69	319	2134.11	0.0201707		0.04
6.68	666	4448.88	0.0421119		0.03
6.67	177	1180.59	0.0111919		0.02
6.66	155	1032.3	0.00980082		0.01
6.65	284	1888.6	0.0179576		0
6.64	277	1839.28	0.017515		-0.01
6.63	1796	11907.5	0.113563		-0.02
6.62	1889	12505.2	0.119444		-0.03
6.61	3259	21542	0.20607		-0.04
6.6	2682	17701.2	0.169586		-0.05
6.59	226	1489.34	0.0142902		-0.06
	15815	6.64982
