# Supplementary material for: Interaction Wave Functions and Interaction-Based Coherence and Entanglement in Complex Adaptive Systems
Source: Research Square preprint supplement (doi:10.21203/rs.3.rs-6846233/v1), 2025-06-16
Supplement: Supplementary file 556 [file 30617.xls]

## Sheet: Sheet1
6.6	42	277.2	0.00252328		0.12
6.59	234	1542.06	0.0140583		0.11
6.58	412	2710.96	0.0247522		0.1
6.57	156	1024.92	0.00937218		0.09
6.56	114	747.84	0.0068489		0.08
6.55	418	2737.9	0.0251126		0.07
6.54	192	1255.68	0.011535		0.06
6.53	190	1240.7	0.0114148		0.05
6.52	170	1108.4	0.0102133		0.04
6.51	335	2180.85	0.0201262		0.03
6.5	2153	13994.5	0.129348		0.02
6.49	1051	6820.99	0.0631421		0.01
6.48	2400	15552	0.144187		0
6.47	2998	19397.1	0.180114		-0.01
6.46	4476	28915	0.26891		-0.02
6.45	1215	7836.75	0.0729949		-0.03
6.44	89	573.16	0.00534695		-0.04
	16645	6.48338
