# Supplementary material for: Interaction Wave Functions and Interaction-Based Coherence and Entanglement in Complex Adaptive Systems
Source: Research Square preprint supplement (doi:10.21203/rs.3.rs-6846233/v1), 2025-06-16
Supplement: Supplementary file 557 [file 30618.xls]

## Sheet: Sheet1
6.54	40	261.6	0.00270234		0.1
6.53	140	914.2	0.00945818		0.09
6.52	557	3631.64	0.03763		0.08
6.51	12	78.12	0.000810701		0.07
6.5	301	1956.5	0.0203351		0.06
6.49	547	3550.03	0.0369545		0.05
6.48	788	5106.24	0.053236		0.04
6.47	356	2303.32	0.0240508		0.03
6.46	1121	7241.66	0.075733		0.02
6.45	1929	12442.1	0.13032		0.01
6.44	1455	9370.2	0.0982975		0
6.43	906	5825.58	0.0612079		-0.01
6.42	1878	12056.8	0.126875		-0.02
6.41	2595	16634	0.175314		-0.03
6.4	2151	13766.4	0.145318		-0.04
6.39	26	166.14	0.00175652		-0.05
	14802	6.43862
