# Supplementary material for: Interaction Wave Functions and Interaction-Based Coherence and Entanglement in Complex Adaptive Systems
Source: Research Square preprint supplement (doi:10.21203/rs.3.rs-6846233/v1), 2025-06-16
Supplement: Supplementary file 558 [file 30619.xls]

## Sheet: Sheet1
6.57	161	1057.77	0.00916491		0.08
6.56	881	5779.36	0.0501509		0.07
6.55	1361	8914.55	0.0774748		0.06
6.54	315	2060.1	0.0179313		0.05
6.53	502	3278.06	0.0285763		0.04
6.52	823	5365.96	0.0468492		0.03
6.51	1005	6542.55	0.0572095		0.02
6.5	2153	13994.5	0.122559		0.01
6.49	1891	12272.6	0.107645		0
6.48	1991	12901.7	0.113338		-0.01
6.47	2002	12952.9	0.113964		-0.02
6.46	1989	12848.9	0.113224		-0.03
6.45	1070	6901.5	0.0609097		-0.04
6.44	413	2659.72	0.02351		-0.05
6.43	756	4861.08	0.0430352		-0.06
6.42	254	1630.68	0.0144589		-0.07
	17567	6.49069
