# Supplementary material for: Interaction Wave Functions and Interaction-Based Coherence and Entanglement in Complex Adaptive Systems
Source: Research Square preprint supplement (doi:10.21203/rs.3.rs-6846233/v1), 2025-06-16
Supplement: Supplementary file 559 [file 30620.xls]

## Sheet: Sheet1
6.59	446	2939.14	0.0384947		0.08
6.58	626	4119.08	0.0540307		0.07
6.57	460	3022.2	0.0397031		0.06
6.56	338	2217.28	0.0291731		0.05
6.55	1144	7493.2	0.0987399		0.04
6.54	705	4610.7	0.0608493		0.03
6.53	867	5661.51	0.0748317		0.02
6.52	545	3553.4	0.0470395		0.01
6.51	628	4088.28	0.0542033		0
6.5	1625	10562.5	0.140255		-0.01
6.49	423	2745.27	0.0365096		-0.02
6.48	1039	6732.72	0.0896772		-0.03
6.47	480	3105.6	0.0414293		-0.04
6.46	1025	6621.5	0.0884688		-0.05
6.45	789	5089.05	0.0680994		-0.06
6.44	158	1017.52	0.0136371		-0.07
6.43	288	1851.84	0.0248576		-0.08
	11586	6.51051
