# Supplementary material for: Interaction Wave Functions and Interaction-Based Coherence and Entanglement in Complex Adaptive Systems
Source: Research Square preprint supplement (doi:10.21203/rs.3.rs-6846233/v1), 2025-06-16
Supplement: Supplementary file 560 [file 30623-27.xls]

## Sheet: Sheet1
0.14			3			3		6.22394e-05
0.13			177			177		0.00367212
0.12			5			5		0.000103732
0.11			40		89	129		0.00267629
0.1			192		7	199		0.00412855
0.09			298	140	63	501		0.010394
0.08	51		88	862	17	1018		0.0211199
0.07	0	10	0	1344	40	1394		0.0289206
0.06	653	20	141	1161	31	2006		0.0416174
0.05	62	533	137	938	286	1956		0.0405801
0.04	174	91	288	81	483	1117		0.0231738
0.03	441	213	633	246	855	2388		0.0495425
0.02	212	1116	530	404	1022	3284		0.0681314
0.01	1268	924	1129	353	1206	4880		0.101243
2.42861e-17	2777	1291	702	1058	660	6488		0.134603
-0.01	2077	1511	550	243	740	5121		0.106243
-0.02	2152	1581	992	838	708	6271		0.130101
-0.03	72	857	793	908	6	2636		0.0546877
-0.04			790	974	409	2173		0.0450821
-0.05			1072	1525	830	3427		0.0710981
-0.06			69	682	576	1327		0.0275305
-0.07				757		757		0.0157051
-0.08				446		446		0.00925292
-0.09				498		498		0.0103317
						48201
