# Supplementary material for: Interaction Wave Functions and Interaction-Based Coherence and Entanglement in Complex Adaptive Systems
Source: Research Square preprint supplement (doi:10.21203/rs.3.rs-6846233/v1), 2025-06-16
Supplement: Supplementary file 561 [file 30623.xls]

## Sheet: Sheet1
6.45	51	328.95	0.0051313		0.08
6.44	0	0	0		0.07
6.43	653	4198.79	0.0657008		0.06
6.42	62	398.04	0.00623805		0.05
6.41	174	1115.34	0.0175068		0.04
6.4	441	2822.4	0.0443707		0.03
6.39	212	1354.68	0.0213301		0.02
6.38	1268	8089.84	0.127578		0.01
6.37	2777	17689.5	0.279404		0
6.36	2077	13209.7	0.208975		-0.01
6.35	2152	13665.2	0.216521		-0.02
6.34	72	456.48	0.00724419		-0.03
	9939	6.37176
