# Supplementary material for: Interaction Wave Functions and Interaction-Based Coherence and Entanglement in Complex Adaptive Systems
Source: Research Square preprint supplement (doi:10.21203/rs.3.rs-6846233/v1), 2025-06-16
Supplement: Supplementary file 562 [file 30624.xls]

## Sheet: Sheet1
6.4	10	64	0.00122745		0.07
6.39	20	127.8	0.00245489		0.06
6.38	533	3400.54	0.0654229		0.05
6.37	91	579.67	0.0111698		0.04
6.36	213	1354.68	0.0261446		0.03
6.35	1116	7086.6	0.136983		0.02
6.34	924	5858.16	0.113416		0.01
6.33	1291	8172.03	0.158463		0
6.32	1511	9549.52	0.185467		-0.01
6.31	1581	9976.11	0.194059		-0.02
6.3	857	5399.1	0.105192		-0.03
	8147	6.32972
