# Supplementary material for: Interaction Wave Functions and Interaction-Based Coherence and Entanglement in Complex Adaptive Systems
Source: Research Square preprint supplement (doi:10.21203/rs.3.rs-6846233/v1), 2025-06-16
Supplement: Supplementary file 563 [file 30625.xls]

## Sheet: Sheet1
6.41	3	19.23	0.000347665		0.14
6.4	177	1132.8	0.0205122		0.13
6.39	5	31.95	0.000579441		0.12
6.38	40	255.2	0.00463553		0.11
6.37	192	1223.04	0.0222506		0.1
6.36	298	1895.28	0.0345347		0.09
6.35	88	558.8	0.0101982		0.08
6.34	0	0	0		0.07
6.33	141	892.53	0.0163402		0.06
6.32	137	865.84	0.0158767		0.05
6.31	288	1817.28	0.0333758		0.04
6.3	633	3987.9	0.0733573		0.03
6.29	530	3333.7	0.0614208		0.02
6.28	1129	7090.12	0.130838		0.01
6.27	702	4401.54	0.0813536		0
6.26	550	3443	0.0637386		-0.01
6.25	992	6200	0.114961		-0.02
6.24	793	4948.32	0.0918994		-0.03
6.23	790	4921.7	0.0915517		-0.04
6.22	1072	6667.84	0.124232		-0.05
6.21	69	428.49	0.00799629		-0.06
	8629	6.27124
