# Supplementary material for: Interaction Wave Functions and Interaction-Based Coherence and Entanglement in Complex Adaptive Systems
Source: Research Square preprint supplement (doi:10.21203/rs.3.rs-6846233/v1), 2025-06-16
Supplement: Supplementary file 564 [file 30626.xls]

## Sheet: Sheet1
6.29	140	880.6	0.0104027		0.09
6.28	862	5413.36	0.0640511		0.08
6.27	1344	8426.88	0.0998663		0.07
6.26	1161	7267.86	0.0862684		0.06
6.25	938	5862.5	0.0696983		0.05
6.24	81	505.44	0.00601872		0.04
6.23	246	1532.58	0.0182791		0.03
6.22	404	2512.88	0.0300193		0.02
6.21	353	2192.13	0.0262298		0.01
6.2	1058	6559.6	0.078615		0
6.19	243	1504.17	0.0180562		-0.01
6.18	838	5178.84	0.0622678		-0.02
6.17	908	5602.36	0.0674692		-0.03
6.16	974	5999.84	0.0723733		-0.04
6.15	1525	9378.75	0.113316		-0.05
6.14	682	4187.48	0.0506762		-0.06
6.13	757	4640.41	0.0562491		-0.07
6.12	446	2729.52	0.0331401		-0.08
6.11	498	3042.78	0.037004		-0.09
	13458	6.19839
