# Supplementary material for: Interaction Wave Functions and Interaction-Based Coherence and Entanglement in Complex Adaptive Systems
Source: Research Square preprint supplement (doi:10.21203/rs.3.rs-6846233/v1), 2025-06-16
Supplement: Supplementary file 565 [file 30627.xls]

## Sheet: Sheet1
6.28	89	558.92	0.0110862		0.11
6.27	7	43.89	0.000871948		0.1
6.26	63	394.38	0.00784753		0.09
6.25	17	106.25	0.00211759		0.08
6.24	40	249.6	0.00498256		0.07
6.23	31	193.13	0.00386148		0.06
6.22	286	1778.92	0.0356253		0.05
6.21	483	2999.43	0.0601644		0.04
6.2	855	5301	0.106502		0.03
6.19	1022	6326.18	0.127304		0.02
6.18	1206	7453.08	0.150224		0.01
6.17	660	4072.2	0.0822123		0
6.16	740	4558.4	0.0921774		-0.01
6.15	708	4354.2	0.0881913		-0.02
6.14	6	36.84	0.000747384		-0.03
6.13	409	2507.17	0.0509467		-0.04
6.12	830	5079.6	0.103388		-0.05
6.11	576	3519.36	0.0717489		-0.06
	8028	6.16997
