# Supplementary material for: Interaction Wave Functions and Interaction-Based Coherence and Entanglement in Complex Adaptive Systems
Source: Research Square preprint supplement (doi:10.21203/rs.3.rs-6846233/v1), 2025-06-16
Supplement: Supplementary file 566 [file 30630.xls]

## Sheet: Sheet1
6.15	42	258.3	0.00652782		0.06
6.14	112	687.68	0.0174075		0.05
6.13	162	993.06	0.0251787		0.04
6.12	199	1217.88	0.0309294		0.03
6.11	345	2107.95	0.0536214		0.02
6.1	1245	7594.5	0.193503		0.01
6.09	1375	8373.75	0.213708		0
6.08	1871	11375.7	0.290799		-0.01
6.07	717	4352.19	0.111439		-0.02
6.06	366	2217.96	0.0568853		-0.03
	6434	6.08936
