# Supplementary material for: Interaction Wave Functions and Interaction-Based Coherence and Entanglement in Complex Adaptive Systems
Source: Research Square preprint supplement (doi:10.21203/rs.3.rs-6846233/v1), 2025-06-16
Supplement: Supplementary file 567 [file 30602-06.xls]

## Sheet: Sheet1
0.11					300	300	33	0.00879869
0.1					0	0	0	0
0.09	119				0	119	10.71	0.00349015
0.08	28		53		0	81	6.48	0.00237565
0.07	55	50	129		0	234	16.38	0.00686298
0.06	142	31	116		0	289	17.34	0.00847607
0.05	5	0	1582	234	0	1821	91.05	0.053408
0.04	534	188	710	283	210	1925	77	0.0564582
0.03	266	570	486	346	1029	2697	80.91	0.0791002
0.02	601	402	176	620	300	2099	41.98	0.0615615
0.01	360	2049	305	533	502	3749	37.49	0.109954
0	794	1090	487	665	443	3479	0	0.102035
-0.01	1384	1641	1122	573	787	5507	-55.07	0.161515
-0.02	1274	1542	863	593	750	5022	-100.44	0.14729
-0.03	847	18	397	391	173	1826	-54.78	0.0535547
-0.04	570		500	801	301	2172	-86.88	0.0637025
-0.05	70		786	124	144	1124	-56.2	0.0329657
-0.06			437		235	672	-40.32	0.0197091
-0.07			285		622	907	-63.49	0.0266014
-0.08			73			73	-5.84	0.00214101
						34096	-0.00148639
