# Supplementary material for: Interaction Wave Functions and Interaction-Based Coherence and Entanglement in Complex Adaptive Systems
Source: Research Square preprint supplement (doi:10.21203/rs.3.rs-6846233/v1), 2025-06-16
Supplement: Supplementary file 568 [file 30602.xls]

## Sheet: Sheet1
6.15	119	731.85	0.0168818		0.09
6.14	28	171.92	0.00397219		0.08
6.13	55	337.15	0.00780253		0.07
6.12	142	869.04	0.0201447		0.06
6.11	5	30.55	0.00070932		0.05
6.1	534	3257.4	0.0757554		0.04
6.09	266	1619.94	0.0377358		0.03
6.08	601	3654.08	0.0852603		0.02
6.07	360	2185.2	0.0510711		0.01
6.06	794	4811.64	0.11264		0
6.05	1384	8373.2	0.19634		-0.01
6.04	1274	7694.96	0.180735		-0.02
6.03	847	5107.41	0.120159		-0.03
6.02	570	3431.4	0.0808625		-0.04
6.01	70	420.7	0.00993049		-0.05
	7049	6.05709
