# Supplementary material for: Interaction Wave Functions and Interaction-Based Coherence and Entanglement in Complex Adaptive Systems
Source: Research Square preprint supplement (doi:10.21203/rs.3.rs-6846233/v1), 2025-06-16
Supplement: Supplementary file 569 [file 30603.xls]

## Sheet: Sheet1
6.09	50	304.5	0.00659544		0.07
6.08	31	188.48	0.00408917		0.06
6.07	0	0	0		0.05
6.06	188	1139.28	0.0247988		0.04
6.05	570	3448.5	0.075188		0.03
6.04	402	2428.08	0.0530273		0.02
6.03	2049	12355.5	0.270281		0.01
6.02	1090	6561.8	0.143781		0
6.01	1641	9862.41	0.216462		-0.01
6	1542	9252	0.203403		-0.02
5.99	18	107.82	0.00237436		-0.03
	7581	6.02141
