# Supplementary material for: Interaction Wave Functions and Interaction-Based Coherence and Entanglement in Complex Adaptive Systems
Source: Research Square preprint supplement (doi:10.21203/rs.3.rs-6846233/v1), 2025-06-16
Supplement: Supplementary file 570 [file 30604.xls]

## Sheet: Sheet1
6.03	53	319.59	0.00623016		0.08
6.02	129	776.58	0.015164		0.07
6.01	116	697.16	0.0136358		0.06
6	1582	9492	0.185964		0.05
5.99	710	4252.9	0.0834607		0.04
5.98	486	2906.28	0.0571294		0.03
5.97	176	1050.72	0.0206888		0.02
5.96	305	1817.8	0.0358528		0.01
5.95	487	2897.65	0.057247		0
5.94	1122	6664.68	0.131891		-0.01
5.93	863	5117.59	0.101446		-0.02
5.92	397	2350.24	0.0466675		-0.03
5.91	500	2955	0.0587751		-0.04
5.9	786	4637.4	0.0923945		-0.05
5.89	437	2573.93	0.0513695		-0.06
5.88	285	1675.8	0.0335018		-0.07
5.87	73	428.51	0.00858117		-0.08
	8507	5.94967
