# Supplementary material for: Interaction Wave Functions and Interaction-Based Coherence and Entanglement in Complex Adaptive Systems
Source: Research Square preprint supplement (doi:10.21203/rs.3.rs-6846233/v1), 2025-06-16
Supplement: Supplementary file 571 [file 30605.xls]

## Sheet: Sheet1
6	234	1404	0.0453225		0.05
5.99	283	1695.17	0.0548131		0.04
5.98	346	2069.08	0.0670153		0.03
5.97	620	3701.4	0.120085		0.02
5.96	533	3176.68	0.103235		0.01
5.95	665	3956.75	0.128801		0
5.94	573	3403.62	0.110982		-0.01
5.93	593	3516.49	0.114856		-0.02
5.92	391	2314.72	0.0757312		-0.03
5.91	801	4733.91	0.155142		-0.04
5.9	124	731.6	0.024017		-0.05
	5163	5.94682
