# Supplementary material for: Interaction Wave Functions and Interaction-Based Coherence and Entanglement in Complex Adaptive Systems
Source: Research Square preprint supplement (doi:10.21203/rs.3.rs-6846233/v1), 2025-06-16
Supplement: Supplementary file 572 [file 30606.xls]

## Sheet: Sheet1
5.98	300	1794	0.0517598		0.11
5.97	0	0	0		0.1
5.96	0	0	0		0.09
5.95	0	0	0		0.08
5.94	0	0	0		0.07
5.93	0	0	0		0.06
5.92	0	0	0		0.05
5.91	210	1241.1	0.0362319		0.04
5.9	1029	6071.1	0.177536		0.03
5.89	300	1767	0.0517598		0.02
5.88	502	2951.76	0.0866115		0.01
5.87	443	2600.41	0.076432		0
5.86	787	4611.82	0.135783		-0.01
5.85	750	4387.5	0.1294		-0.02
5.84	173	1010.32	0.0298482		-0.03
5.83	301	1754.83	0.0519324		-0.04
5.82	144	838.08	0.0248447		-0.05
5.81	235	1365.35	0.0405452		-0.06
5.8	622	3607.6	0.107315		-0.07
	5796	5.86626
