# Supplementary material for: Interaction Wave Functions and Interaction-Based Coherence and Entanglement in Complex Adaptive Systems
Source: Research Square preprint supplement (doi:10.21203/rs.3.rs-6846233/v1), 2025-06-16
Supplement: Supplementary file 573 [file 30609-13.xls]

## Sheet: Sheet1
0.11			44			44	4.84	0.00185193
0.1			103			103	10.3	0.0043352
0.09			13			13	1.17	0.000547161
0.08			140		200	340	27.2	0.0143104
0.07	23		185		20	228	15.96	0.00959636
0.06	315		280	50	202	847	50.82	0.0356496
0.05	511		474	225	191	1401	70.05	0.0589671
0.04	214	69	513	642	356	1794	71.76	0.0755082
0.03	36	183	319	34	619	1191	35.73	0.0501284
0.02	15	204	330	296	1605	2450	49	0.103119
0.01	172	488	125	10	765	1560	15.6	0.0656593
0	768	1299	168	680	430	3345	0	0.140789
-0.01	981	505	540	906	464	3396	-33.96	0.142935
-0.02	326	218	87	1049	699	2379	-47.58	0.10013
-0.03	114	0	222	246	129	711	-21.33	0.0299255
-0.04	210	0	110	252	383	955	-38.2	0.0401953
-0.05	460	30	480		109	1079	-53.95	0.0454144
-0.06	431		465		113	1009	-60.54	0.0424681
-0.07			267		208	475	-33.25	0.0199924
-0.08			86		322	408	-32.64	0.0171724
-0.09					31	31	-2.79	0.00130477
						23759	0.0011865
