# Supplementary material for: Interaction Wave Functions and Interaction-Based Coherence and Entanglement in Complex Adaptive Systems
Source: Research Square preprint supplement (doi:10.21203/rs.3.rs-6846233/v1), 2025-06-16
Supplement: Supplementary file 574 [file 30609.xls]

## Sheet: Sheet1
5.83	23	134.09	0.00502622		0.07
5.82	315	1833.3	0.0688374		0.06
5.81	511	2968.91	0.11167		0.05
5.8	214	1241.2	0.0467657		0.04
5.79	36	208.44	0.00786713		0.03
5.78	15	86.7	0.00327797		0.02
5.77	172	992.44	0.0375874		0.01
5.76	768	4423.68	0.167832		0
5.75	981	5640.75	0.214379		-0.01
5.74	326	1871.24	0.0712413		-0.02
5.73	114	653.22	0.0249126		-0.03
5.72	210	1201.2	0.0458916		-0.04
5.71	460	2626.6	0.100524		-0.05
5.7	431	2456.7	0.0941871		-0.06
	4576	5.75578
