# Supplementary material for: Interaction Wave Functions and Interaction-Based Coherence and Entanglement in Complex Adaptive Systems
Source: Research Square preprint supplement (doi:10.21203/rs.3.rs-6846233/v1), 2025-06-16
Supplement: Supplementary file 575 [file 30610.xls]

## Sheet: Sheet1
5.79	69	399.51	0.0230307		0.04
5.78	183	1057.74	0.0610814		0.03
5.77	204	1177.08	0.0680908		0.02
5.76	488	2810.88	0.162884		0.01
5.75	1299	7469.25	0.433578		0
5.74	505	2898.7	0.168558		-0.01
5.73	218	1249.14	0.0727637		-0.02
5.72	0	0	0		-0.03
5.71	0	0	0		-0.04
5.7	30	171	0.0100134		-0.05
	2996	5.7521
