# Supplementary material for: Interaction Wave Functions and Interaction-Based Coherence and Entanglement in Complex Adaptive Systems
Source: Research Square preprint supplement (doi:10.21203/rs.3.rs-6846233/v1), 2025-06-16
Supplement: Supplementary file 576 [file 30611.xls]

## Sheet: Sheet1
5.97	44	262.68	0.00888709		0.11
5.96	103	613.88	0.0208039		0.1
5.95	13	77.35	0.00262573		0.09
5.94	140	831.6	0.0282771		0.08
5.93	185	1097.05	0.0373662		0.07
5.92	280	1657.6	0.0565542		0.06
5.91	474	2801.34	0.0957382		0.05
5.9	513	3026.7	0.103615		0.04
5.89	319	1878.91	0.0644314		0.03
5.88	330	1940.4	0.0666532		0.02
5.87	125	733.75	0.0252474		0.01
5.86	168	984.48	0.0339325		0
5.85	540	3159	0.109069		-0.01
5.84	87	508.08	0.0175722		-0.02
5.83	222	1294.26	0.0448394		-0.03
5.82	110	640.2	0.0222177		-0.04
5.81	480	2788.8	0.0969501		-0.05
5.8	465	2697	0.0939204		-0.06
5.79	267	1545.93	0.0539285		-0.07
5.78	86	497.08	0.0173702		-0.08
	4951	5.86469
