# Supplementary material for: Interaction Wave Functions and Interaction-Based Coherence and Entanglement in Complex Adaptive Systems
Source: Research Square preprint supplement (doi:10.21203/rs.3.rs-6846233/v1), 2025-06-16
Supplement: Supplementary file 577 [file 30612.xls]

## Sheet: Sheet1
5.92	50	296	0.0113895		0.06
5.91	225	1329.75	0.0512528		0.05
5.9	642	3787.8	0.146241		0.04
5.89	34	200.26	0.00774487		0.03
5.88	296	1740.48	0.067426		0.02
5.87	10	58.7	0.0022779		0.01
5.86	680	3984.8	0.154897		0
5.85	906	5300.1	0.206378		-0.01
5.84	1049	6126.16	0.238952		-0.02
5.83	246	1434.18	0.0560364		-0.03
5.82	252	1466.64	0.0574032		-0.04
	4390	5.85988
