# Supplementary material for: Interaction Wave Functions and Interaction-Based Coherence and Entanglement in Complex Adaptive Systems
Source: Research Square preprint supplement (doi:10.21203/rs.3.rs-6846233/v1), 2025-06-16
Supplement: Supplementary file 578 [file 30613.xls]

## Sheet: Sheet1
6	200	1200	0.0292141		0.08
5.99	20	119.8	0.00292141		0.07
5.98	202	1207.96	0.0295063		0.06
5.97	191	1140.27	0.0278995		0.05
5.96	356	2121.76	0.0520012		0.04
5.95	619	3683.05	0.0904178		0.03
5.94	1605	9533.7	0.234443		0.02
5.93	765	4536.45	0.111744		0.01
5.92	430	2545.6	0.0628104		0
5.91	464	2742.24	0.0677768		-0.01
5.9	699	4124.1	0.102103		-0.02
5.89	129	759.81	0.0188431		-0.03
5.88	383	2252.04	0.0559451		-0.04
5.87	109	639.83	0.0159217		-0.05
5.86	113	662.18	0.016506		-0.06
5.85	208	1216.8	0.0303827		-0.07
5.84	322	1880.48	0.0470348		-0.08
5.83	31	180.73	0.00452819		-0.09
	6846	5.9227
