# Supplementary material for: Interaction Wave Functions and Interaction-Based Coherence and Entanglement in Complex Adaptive Systems
Source: Research Square preprint supplement (doi:10.21203/rs.3.rs-6846233/v1), 2025-06-16
Supplement: Supplementary file 579 [file 30616-20.xls]

## Sheet: Sheet1
0.11				15		15	1.65	0.000856213
0.1				0		0	0	0
0.09				0		0	0	0
0.08				51		51	4.08	0.00291113
0.07				0	65	65	4.55	0.00371026
0.06	2	20		0	0	22	1.32	0.00125578
0.05	0	23	16	173	63	275	13.75	0.0156972
0.04	67	89	48	136	137	477	19.08	0.0272276
0.03	280	45	472	293	105	1195	35.85	0.0682117
0.02	350	205	283	280	148	1266	25.32	0.0722644
0.01	653	580	814	803	471	3321	33.21	0.189566
0	381	517	381	952	1059	3290	0	0.187796
-0.01	1021	851	698	765	344	3679	-36.79	0.210001
-0.02	641	273	444	1368	175	2901	-58.02	0.165592
-0.03	569	11			117	697	-20.91	0.0397854
-0.04					74	74	-2.96	0.00422399
-0.05					191	191	-9.55	0.0109024
						17519	0.000603916
