# Supplementary material for: Interaction Wave Functions and Interaction-Based Coherence and Entanglement in Complex Adaptive Systems
Source: Research Square preprint supplement (doi:10.21203/rs.3.rs-6846233/v1), 2025-06-16
Supplement: Supplementary file 580 [file 30616.xls]

## Sheet: Sheet1
5.97	2	11.94	0.000504541		0.06
5.96	0	0	0		0.05
5.95	67	398.65	0.0169021		0.04
5.94	280	1663.2	0.0706357		0.03
5.93	350	2075.5	0.0882947		0.02
5.92	653	3865.76	0.164733		0.01
5.91	381	2251.71	0.096115		0
5.9	1021	6023.9	0.257568		-0.01
5.89	641	3775.49	0.161705		-0.02
5.88	569	3345.72	0.143542		-0.03
	3964	5.90612
