# Supplementary material for: Interaction Wave Functions and Interaction-Based Coherence and Entanglement in Complex Adaptive Systems
Source: Research Square preprint supplement (doi:10.21203/rs.3.rs-6846233/v1), 2025-06-16
Supplement: Supplementary file 581 [file 30617.xls]

## Sheet: Sheet1
5.95	20	119	0.00765111		0.06
5.94	23	136.62	0.00879878		0.05
5.93	89	527.77	0.0340474		0.04
5.92	45	266.4	0.017215		0.03
5.91	205	1211.55	0.0784239		0.02
5.9	580	3422	0.221882		0.01
5.89	517	3045.13	0.197781		0
5.88	851	5003.88	0.325555		-0.01
5.87	273	1602.51	0.104438		-0.02
5.86	11	64.46	0.00420811		-0.03
	2614	5.89109
