# Supplementary material for: Interaction Wave Functions and Interaction-Based Coherence and Entanglement in Complex Adaptive Systems
Source: Research Square preprint supplement (doi:10.21203/rs.3.rs-6846233/v1), 2025-06-16
Supplement: Supplementary file 582 [file 30618.xls]

## Sheet: Sheet1
5.92	16	94.72	0.00506971		0.05
5.91	48	283.68	0.0152091		0.04
5.9	472	2784.8	0.149556		0.03
5.89	283	1666.87	0.0896705		0.02
5.88	814	4786.32	0.257921		0.01
5.87	381	2236.47	0.120722		0
5.86	698	4090.28	0.221166		-0.01
5.85	444	2597.4	0.140684		-0.02
	3156	5.8747
