# Supplementary material for: Interaction Wave Functions and Interaction-Based Coherence and Entanglement in Complex Adaptive Systems
Source: Research Square preprint supplement (doi:10.21203/rs.3.rs-6846233/v1), 2025-06-16
Supplement: Supplementary file 583 [file 30619.xls]

## Sheet: Sheet1
5.88	15	88.2	0.00310174		0.11
5.87	0	0	0		0.1
5.86	0	0	0		0.09
5.85	51	298.35	0.0105459		0.08
5.84	0	0	0		0.07
5.83	0	0	0		0.06
5.82	173	1006.86	0.0357734		0.05
5.81	136	790.16	0.0281224		0.04
5.8	293	1699.4	0.0605873		0.03
5.79	280	1621.2	0.0578991		0.02
5.78	803	4641.34	0.166046		0.01
5.77	952	5493.04	0.196857		0
5.76	765	4406.4	0.158189		-0.01
5.75	1368	7866	0.282878		-0.02
	4836	5.7715
