# Supplementary material for: Interaction Wave Functions and Interaction-Based Coherence and Entanglement in Complex Adaptive Systems
Source: Research Square preprint supplement (doi:10.21203/rs.3.rs-6846233/v1), 2025-06-16
Supplement: Supplementary file 584 [file 30620.xls]

## Sheet: Sheet1
5.88	65	382.2	0.0220414		0.07
5.87	0	0	0		0.06
5.86	63	369.18	0.0213632		0.05
5.85	137	801.45	0.0464564		0.04
5.84	105	613.2	0.0356053		0.03
5.83	148	862.84	0.0501865		0.02
5.82	471	2741.22	0.159715		0.01
5.81	1059	6152.79	0.359105		0
5.8	344	1995.2	0.11665		-0.01
5.79	175	1013.25	0.0593421		-0.02
5.78	117	676.26	0.0396745		-0.03
5.77	74	426.98	0.0250933		-0.04
5.76	191	1100.16	0.0647677		-0.05
	2949	5.81035
