# Supplementary material for: Interaction Wave Functions and Interaction-Based Coherence and Entanglement in Complex Adaptive Systems
Source: Research Square preprint supplement (doi:10.21203/rs.3.rs-6846233/v1), 2025-06-16
Supplement: Supplementary file 585 [file 30623-27.xls]

## Sheet: Sheet1
0.1			57			57		0.00412834
0.09		6	0			6		0.000434562
0.08		0	151			151		0.0109365
0.07		0	0			0		0
0.06	36	0	160	99		295		0.021366
0.05	38	3	107	0		148		0.0107192
0.04	289	478	226	173		1166		0.0844499
0.03	196	160	392	432		1180		0.0854639
0.02	161	298	150	71		680		0.0492504
0.01	547	152	16	524		1239		0.0897371
0	1372	334	400	234		2340		0.169479
-0.01	1073	839	456	335		2703		0.19577
-0.02	307	50	803	66		1226		0.0887955
-0.03	207	206	322	455		1190		0.0861882
-0.04	72	91	333	394		890		0.0644601
-0.05			190	184		374		0.0270877
-0.06			135	27		162		0.0117332
						13807
