# Supplementary material for: Interaction Wave Functions and Interaction-Based Coherence and Entanglement in Complex Adaptive Systems
Source: Research Square preprint supplement (doi:10.21203/rs.3.rs-6846233/v1), 2025-06-16
Supplement: Supplementary file 586 [file 30623.xls]

## Sheet: Sheet1
5.76	36	207.36	0.00837599		0.06
5.75	38	218.5	0.00884132		0.05
5.74	289	1658.86	0.0672406		0.04
5.73	196	1123.08	0.0456026		0.03
5.72	161	920.92	0.0374593		0.02
5.71	547	3123.37	0.127268		0.01
5.7	1372	7820.4	0.319218		0
5.69	1073	6105.37	0.249651		-0.01
5.68	307	1743.76	0.0714286		-0.02
5.67	207	1173.69	0.0481619		-0.03
5.66	72	407.52	0.016752		-0.04
	4298	5.70098
