# Supplementary material for: Interaction Wave Functions and Interaction-Based Coherence and Entanglement in Complex Adaptive Systems
Source: Research Square preprint supplement (doi:10.21203/rs.3.rs-6846233/v1), 2025-06-16
Supplement: Supplementary file 587 [file 30625.xls]

## Sheet: Sheet1
5.75	6	34.5	0.0022927		0.09
5.74	0	0	0		0.08
5.73	0	0	0		0.07
5.72	0	0	0		0.06
5.71	3	17.13	0.00114635		0.05
5.7	478	2724.6	0.182652		0.04
5.69	160	910.4	0.0611387		0.03
5.68	298	1692.64	0.113871		0.02
5.67	152	861.84	0.0580818		0.01
5.66	334	1890.44	0.127627		0
5.65	839	4740.35	0.320596		-0.01
5.64	50	282	0.0191058		-0.02
5.63	206	1159.78	0.0787161		-0.03
5.62	91	511.42	0.0347726		-0.04
	2617	5.66492
