# Supplementary material for: Interaction Wave Functions and Interaction-Based Coherence and Entanglement in Complex Adaptive Systems
Source: Research Square preprint supplement (doi:10.21203/rs.3.rs-6846233/v1), 2025-06-16
Supplement: Supplementary file 588 [file 30626.xls]

## Sheet: Sheet1
5.72	57	326.04	0.0146229		0.1
5.71	0	0	0		0.09
5.7	151	860.7	0.0387378		0.08
5.69	0	0	0		0.07
5.68	160	908.8	0.0410467		0.06
5.67	107	606.69	0.02745		0.05
5.66	226	1279.16	0.0579785		0.04
5.65	392	2214.8	0.100564		0.03
5.64	150	846	0.0384813		0.02
5.63	16	90.08	0.00410467		0.01
5.62	400	2248	0.102617		0
5.61	456	2558.16	0.116983		-0.01
5.6	803	4496.8	0.206003		-0.02
5.59	322	1799.98	0.0826065		-0.03
5.58	333	1858.14	0.0854284		-0.04
5.57	190	1058.3	0.0487429		-0.05
5.56	135	750.6	0.0346331		-0.06
	3898	5.61884
