# Supplementary material for: Interaction Wave Functions and Interaction-Based Coherence and Entanglement in Complex Adaptive Systems
Source: Research Square preprint supplement (doi:10.21203/rs.3.rs-6846233/v1), 2025-06-16
Supplement: Supplementary file 589 [file 30627.xls]

## Sheet: Sheet1
5.65	99	559.35	0.0330661		0.06
5.64	0	0	0		0.05
5.63	173	973.99	0.0577822		0.04
5.62	432	2427.84	0.144289		0.03
5.61	71	398.31	0.0237141		0.02
5.6	524	2934.4	0.175017		0.01
5.59	234	1308.06	0.0781563		0
5.58	335	1869.3	0.11189		-0.01
5.57	66	367.62	0.0220441		-0.02
5.56	455	2529.8	0.151971		-0.03
5.55	394	2186.7	0.131597		-0.04
5.54	184	1019.36	0.0614562		-0.05
5.53	27	149.31	0.00901804		-0.06
	2994	5.58585
