# Supplementary material for: Interaction Wave Functions and Interaction-Based Coherence and Entanglement in Complex Adaptive Systems
Source: Research Square preprint supplement (doi:10.21203/rs.3.rs-6846233/v1), 2025-06-16
Supplement: Supplementary file 590 [file 30630.xls]

## Sheet: Sheet1
5.59	160	894.4	0.0759374		0.06
5.58	51	284.58	0.024205		0.05
5.57	0	0	0		0.04
5.56	62	344.72	0.0294257		0.03
5.55	90	499.5	0.0427148		0.02
5.54	141	781.14	0.0669198		0.01
5.53	272	1504.16	0.129093		0
5.52	450	2484	0.213574		-0.01
5.51	440	2424.4	0.208828		-0.02
5.5	431	2370.5	0.204556		-0.03
5.49	10	54.9	0.00474608		-0.04
	2107	5.52553
