# Supplementary material for: Interaction Wave Functions and Interaction-Based Coherence and Entanglement in Complex Adaptive Systems
Source: Research Square preprint supplement (doi:10.21203/rs.3.rs-6846233/v1), 2025-06-16
Supplement: Supplementary file 591 [file 30602-06.xls]

## Sheet: Sheet1
0.27	15					15	4.05	0.000494527
0.26	0					0	0	0
0.25	0					0	0	0
0.24	0					0	0	0
0.23	23					23	5.29	0.000758275
0.22	108					108	23.76	0.0035606
0.21	0					0	0	0
0.2	30					30	6	0.000989054
0.19	12					12	2.28	0.000395622
0.18	0					0	0	0
0.17	43					43	7.31	0.00141764
0.16	5			6		11	1.76	0.000362653
0.15	44			30		74	11.1	0.00243967
0.14	43		69	22		134	18.76	0.00441778
0.13	31	54	60	162		307	39.91	0.0101213
0.12	215	37	3	7		262	31.44	0.00863774
0.11	30	0	277	45	3	355	39.05	0.0117038
0.1	0	2	150	42	59	253	25.3	0.00834103
0.09	8	0	192	16	322	538	48.42	0.017737
0.08	64	111	98	85	357	715	57.2	0.0235725
0.07	289	257	192	102	228	1068	74.76	0.0352103
0.06	93	91	241	113	197	735	44.1	0.0242318
0.05	682	77	43	101	35	938	46.9	0.0309244
0.04	213	153	233	74	352	1025	41	0.0337927
0.03	225	395	264	312	396	1592	47.76	0.0524858
0.02	490	721	39	228	84	1562	31.24	0.0514968
0.01	171	434	658	326	288	1877	18.77	0.0618818
-8.67362e-17	290	980	213	169	299	1951	-1.69222e-13	0.0643215
-0.01	244	149	340	614	177	1524	-15.24	0.050244
-0.02	992	2433	80	575	837	4917	-98.34	0.162106
-0.03	2058	673	385	58	244	3418	-102.54	0.112686
-0.04	106	619	464	69	261	1519	-60.76	0.0500791
-0.05	678	49	121	30	89	967	-48.35	0.0318805
-0.06	378		31	596	105	1110	-66.6	0.036595
-0.07	409		300	373	573	1655	-115.85	0.0545628
-0.08	527		165		0	692	-55.36	0.0228142
-0.09	46		549		230	825	-74.25	0.027199
-0.1	11				66	77	-7.7	0.00253857
						30332	-0.000620797
