# Supplementary material for: Interaction Wave Functions and Interaction-Based Coherence and Entanglement in Complex Adaptive Systems
Source: Research Square preprint supplement (doi:10.21203/rs.3.rs-6846233/v1), 2025-06-16
Supplement: Supplementary file 592 [file 30602.xls]

## Sheet: Sheet1
10.6	15	159	0.00174968		0.27
10.59	0	0	0		0.26
10.58	0	0	0		0.25
10.57	0	0	0		0.24
10.56	23	242.88	0.00268284		0.23
10.55	108	1139.4	0.0125977		0.22
10.54	0	0	0		0.21
10.53	30	315.9	0.00349936		0.2
10.52	12	126.24	0.00139974		0.19
10.51	0	0	0		0.18
10.5	43	451.5	0.00501575		0.17
10.49	5	52.45	0.000583226		0.16
10.48	44	461.12	0.00513239		0.15
10.47	43	450.21	0.00501575		0.14
10.46	31	324.26	0.003616		0.13
10.45	215	2246.75	0.0250787		0.12
10.44	30	313.2	0.00349936		0.11
10.43	0	0	0		0.1
10.42	8	83.36	0.000933162		0.09
10.41	64	666.24	0.0074653		0.08
10.4	289	3005.6	0.0337105		0.07
10.39	93	966.27	0.010848		0.06
10.38	682	7079.16	0.0795521		0.05
10.37	213	2208.81	0.0248454		0.04
10.36	225	2331	0.0262452		0.03
10.35	490	5071.5	0.0571562		0.02
10.34	171	1768.14	0.0199463		0.01
10.33	290	2995.7	0.0338271		0
10.32	244	2518.08	0.0284614		-0.01
10.31	992	10227.5	0.115712		-0.02
10.3	2058	21197.4	0.240056		-0.03
10.29	106	1090.74	0.0123644		-0.04
10.28	678	6969.84	0.0790855		-0.05
10.27	378	3882.06	0.0440919		-0.06
10.26	409	4196.34	0.0477079		-0.07
10.25	527	5401.75	0.0614721		-0.08
10.24	46	471.04	0.00536568		-0.09
10.23	11	112.53	0.0012831		-0.1
	8573	10.3261
