# Supplementary material for: Interaction Wave Functions and Interaction-Based Coherence and Entanglement in Complex Adaptive Systems
Source: Research Square preprint supplement (doi:10.21203/rs.3.rs-6846233/v1), 2025-06-16
Supplement: Supplementary file 593 [file 30603.xls]

## Sheet: Sheet1
10.35	54	558.9	0.00746372		0.13
10.34	37	382.58	0.00511403		0.12
10.33	0	0	0		0.11
10.32	2	20.64	0.000276434		0.1
10.31	0	0	0		0.09
10.3	111	1143.3	0.0153421		0.08
10.29	257	2644.53	0.0355218		0.07
10.28	91	935.48	0.0125777		0.06
10.27	77	790.79	0.0106427		0.05
10.26	153	1569.78	0.0211472		0.04
10.25	395	4048.75	0.0545957		0.03
10.24	721	7383.04	0.0996545		0.02
10.23	434	4439.82	0.0599862		0.01
10.22	980	10015.6	0.135453		0
10.21	149	1521.29	0.0205943		-0.01
10.2	2433	24816.6	0.336282		-0.02
10.19	673	6857.87	0.09302		-0.03
10.18	619	6301.42	0.0855563		-0.04
10.17	49	498.33	0.00677263		-0.05
	7235	10.2182
