# Supplementary material for: Interaction Wave Functions and Interaction-Based Coherence and Entanglement in Complex Adaptive Systems
Source: Research Square preprint supplement (doi:10.21203/rs.3.rs-6846233/v1), 2025-06-16
Supplement: Supplementary file 594 [file 30604.xls]

## Sheet: Sheet1
10.33	69	712.77	0.013354		0.14
10.32	60	619.2	0.0116122		0.13
10.31	3	30.93	0.000580608		0.12
10.3	277	2853.1	0.0536094		0.11
10.29	150	1543.5	0.0290304		0.1
10.28	192	1973.76	0.0371589		0.09
10.27	98	1006.46	0.0189665		0.08
10.26	192	1969.92	0.0371589		0.07
10.25	241	2470.25	0.0466422		0.06
10.24	43	440.32	0.00832204		0.05
10.23	233	2383.59	0.0450939		0.04
10.22	264	2698.08	0.0510935		0.03
10.21	39	398.19	0.0075479		0.02
10.2	658	6711.6	0.127347		0.01
10.19	213	2170.47	0.0412231		0
10.18	340	3461.2	0.0658022		-0.01
10.17	80	813.6	0.0154829		-0.02
10.16	385	3911.6	0.0745113		-0.03
10.15	464	4709.6	0.0898007		-0.04
10.14	121	1226.94	0.0234178		-0.05
10.13	31	314.03	0.00599961		-0.06
10.12	300	3036	0.0580608		-0.07
10.11	165	1668.15	0.0319334		-0.08
10.1	549	5544.9	0.106251		-0.09
	5167	10.1932
