# Supplementary material for: Interaction Wave Functions and Interaction-Based Coherence and Entanglement in Complex Adaptive Systems
Source: Research Square preprint supplement (doi:10.21203/rs.3.rs-6846233/v1), 2025-06-16
Supplement: Supplementary file 595 [file 30605.xls]

## Sheet: Sheet1
10.33	6	61.98	0.00144404		0.16
10.32	30	309.6	0.00722022		0.15
10.31	22	226.82	0.00529483		0.14
10.3	162	1668.6	0.0389892		0.13
10.29	7	72.03	0.00168472		0.12
10.28	45	462.6	0.0108303		0.11
10.27	42	431.34	0.0101083		0.1
10.26	16	164.16	0.00385078		0.09
10.25	85	871.25	0.0204573		0.08
10.24	102	1044.48	0.0245487		0.07
10.23	113	1155.99	0.0271961		0.06
10.22	101	1032.22	0.0243081		0.05
10.21	74	755.54	0.0178099		0.04
10.2	312	3182.4	0.0750903		0.03
10.19	228	2323.32	0.0548736		0.02
10.18	326	3318.68	0.0784597		0.01
10.17	169	1718.73	0.0406739		0
10.16	614	6238.24	0.147774		-0.01
10.15	575	5836.25	0.138387		-0.02
10.14	58	588.12	0.0139591		-0.03
10.13	69	698.97	0.0166065		-0.04
10.12	30	303.6	0.00722022		-0.05
10.11	596	6025.56	0.143442		-0.06
10.1	373	3767.3	0.0897714		-0.07
	4155	10.1703
