# Supplementary material for: Interaction Wave Functions and Interaction-Based Coherence and Entanglement in Complex Adaptive Systems
Source: Research Square preprint supplement (doi:10.21203/rs.3.rs-6846233/v1), 2025-06-16
Supplement: Supplementary file 596 [file 30606.xls]

## Sheet: Sheet1
10.23	3	30.69	0.000576701		0.11
10.22	59	602.98	0.0113418		0.1
10.21	322	3287.62	0.0618993		0.09
10.2	357	3641.4	0.0686275		0.08
10.19	228	2323.32	0.0438293		0.07
10.18	197	2005.46	0.03787		0.06
10.17	35	355.95	0.00672818		0.05
10.16	352	3576.32	0.0676663		0.04
10.15	396	4019.4	0.0761246		0.03
10.14	84	851.76	0.0161476		0.02
10.13	288	2917.44	0.0553633		0.01
10.12	299	3025.88	0.0574779		0
10.11	177	1789.47	0.0340254		-0.01
10.1	837	8453.7	0.1609		-0.02
10.09	244	2461.96	0.046905		-0.03
10.08	261	2630.88	0.050173		-0.04
10.07	89	896.23	0.0171088		-0.05
10.06	105	1056.3	0.0201845		-0.06
10.05	573	5758.65	0.11015		-0.07
10.04	0	0	0		-0.08
10.03	230	2306.9	0.0442138		-0.09
10.02	66	661.32	0.0126874		-0.1
	5202	10.1218
