# Supplementary material for: Interaction Wave Functions and Interaction-Based Coherence and Entanglement in Complex Adaptive Systems
Source: Research Square preprint supplement (doi:10.21203/rs.3.rs-6846233/v1), 2025-06-16
Supplement: Supplementary file 597 [file 30609-13.xls]

## Sheet: Sheet1
0.21	43					43	9.03	0.00189286
0.2	16					16	3.2	0.000704318
0.19	55					55	10.45	0.00242109
0.18	227		57			284	51.12	0.0125017
0.17	185		11			196	33.32	0.0086279
0.16	319		201			520	83.2	0.0228903
0.15	8		165			173	25.95	0.00761544
0.14	7		0			7	0.98	0.000308139
0.13	46		11			57	7.41	0.00250913
0.12	25		26	40		91	10.92	0.00400581
0.11	204		46	0	47	297	32.67	0.0130739
0.1	0		407	99	0	506	50.6	0.0222741
0.09	0	58	18	0	5	81	7.29	0.00356561
0.08	24	40	0	88	0	152	12.16	0.00669102
0.07	5	0	10	112	2	129	9.03	0.00567857
0.06	154	0	4	4	340	502	30.12	0.022098
0.05	177	0	89	136	43	445	22.25	0.0195889
0.04	123	387	77	107	0	694	27.76	0.0305498
0.03	31	182	154	86	40	493	14.79	0.0217018
0.02	127	115	144	388	7	781	15.62	0.0343795
0.01	403	333	345	508	581	2170	21.7	0.0955232
-5.89806e-17	255	455	840	698	462	2710	-1.59837e-13	0.119294
-0.01	251	1032	185	23	964	2455	-24.55	0.108069
-0.02	353	322	259	156	789	1879	-37.58	0.0827134
-0.03	607	471	233	227	457	1995	-59.85	0.0878197
-0.04	1067	75	292	179		1613	-64.52	0.0710041
-0.05	594	84	581	265		1524	-76.2	0.0670863
-0.06	510	113	126	131		880	-52.8	0.0387375
-0.07	124		87	40		251	-17.57	0.011049
-0.08	88		202	0		290	-23.2	0.0127658
-0.09	678		136	0		814	-73.26	0.0358322
-0.1	0		410	80		490	-49	0.0215697
-0.11	118		0			118	-12.98	0.00519435
-0.12	4		0			4	-0.48	0.00017608
-0.13			0			0	0	0
-0.14			0			0	0	0
-0.15			2			2	-0.3	8.80398e-05
						22717	-0.000559933
