# Supplementary material for: Interaction Wave Functions and Interaction-Based Coherence and Entanglement in Complex Adaptive Systems
Source: Research Square preprint supplement (doi:10.21203/rs.3.rs-6846233/v1), 2025-06-16
Supplement: Supplementary file 598 [file 30609.xls]

## Sheet: Sheet1
10	43	430	0.0062976		0.21
9.99	16	159.84	0.00234329		0.2
9.98	55	548.9	0.00805507		0.19
9.97	227	2263.19	0.0332455		0.18
9.96	185	1842.6	0.0270943		0.17
9.95	319	3174.05	0.0467194		0.16
9.94	8	79.52	0.00117165		0.15
9.93	7	69.51	0.00102519		0.14
9.92	46	456.32	0.00673697		0.13
9.91	25	247.75	0.00366139		0.12
9.9	204	2019.6	0.029877		0.11
9.89	0	0	0		0.1
9.88	0	0	0		0.09
9.87	24	236.88	0.00351494		0.08
9.86	5	49.3	0.000732279		0.07
9.85	154	1516.9	0.0225542		0.06
9.84	177	1741.68	0.0259227		0.05
9.83	123	1209.09	0.0180141		0.04
9.82	31	304.42	0.00454013		0.03
9.81	127	1245.87	0.0185999		0.02
9.8	403	3949.4	0.0590217		0.01
9.79	255	2496.45	0.0373462		0
9.78	251	2454.78	0.0367604		-0.01
9.77	353	3448.81	0.0516989		-0.02
9.76	607	5924.32	0.0888987		-0.03
9.75	1067	10403.3	0.156268		-0.04
9.74	594	5785.56	0.0869947		-0.05
9.73	510	4962.3	0.0746924		-0.06
9.72	124	1205.28	0.0181605		-0.07
9.71	88	854.48	0.0128881		-0.08
9.7	678	6576.6	0.099297		-0.09
9.69	0	0	0		-0.1
9.68	118	1142.24	0.0172818		-0.11
9.67	4	38.68	0.000585823		-0.12
	6828	9.78875
