# Supplementary material for: Interaction Wave Functions and Interaction-Based Coherence and Entanglement in Complex Adaptive Systems
Source: Research Square preprint supplement (doi:10.21203/rs.3.rs-6846233/v1), 2025-06-16
Supplement: Supplementary file 599 [file 30610.xls]

## Sheet: Sheet1
9.85	58	571.3	0.0158167		0.09
9.84	40	393.6	0.0109081		0.08
9.83	0	0	0		0.07
9.82	0	0	0		0.06
9.81	0	0	0		0.05
9.8	387	3792.6	0.105536		0.04
9.79	182	1781.78	0.0496319		0.03
9.78	115	1124.7	0.0313608		0.02
9.77	333	3253.41	0.0908099		0.01
9.76	455	4440.8	0.12408		0
9.75	1032	10062	0.281429		-0.01
9.74	322	3136.28	0.0878102		-0.02
9.73	471	4582.83	0.128443		-0.03
9.72	75	729	0.0204527		-0.04
9.71	84	815.64	0.022907		-0.05
9.7	113	1096.1	0.0308154		-0.06
	3667	9.75731
