# Supplementary material for: Interaction Wave Functions and Interaction-Based Coherence and Entanglement in Complex Adaptive Systems
Source: Research Square preprint supplement (doi:10.21203/rs.3.rs-6846233/v1), 2025-06-16
Supplement: Supplementary file 600 [file 30611.xls]

## Sheet: Sheet1
10.08	57	574.56	0.0111372		0.18
10.07	11	110.77	0.00214928		0.17
10.06	201	2022.06	0.0392732		0.16
10.05	165	1658.25	0.0322392		0.15
10.04	0	0	0		0.14
10.03	11	110.33	0.00214928		0.13
10.02	26	260.52	0.00508011		0.12
10.01	46	460.46	0.00898789		0.11
10	407	4070	0.0795233		0.1
9.99	18	179.82	0.003517		0.09
9.98	0	0	0		0.08
9.97	10	99.7	0.00195389		0.07
9.96	4	39.84	0.000781555		0.06
9.95	89	885.55	0.0173896		0.05
9.94	77	765.38	0.0150449		0.04
9.93	154	1529.22	0.0300899		0.03
9.92	144	1428.48	0.028136		0.02
9.91	345	3418.95	0.0674091		0.01
9.9	840	8316	0.164127		0
9.89	185	1829.65	0.0361469		-0.01
9.88	259	2558.92	0.0506057		-0.02
9.87	233	2299.71	0.0455256		-0.03
9.86	292	2879.12	0.0570535		-0.04
9.85	581	5722.85	0.113521		-0.05
9.84	126	1239.84	0.024619		-0.06
9.83	87	855.21	0.0169988		-0.07
9.82	202	1983.64	0.0394685		-0.08
9.81	136	1334.16	0.0265729		-0.09
9.8	410	4018	0.0801094		-0.1
9.79	0	0	0		-0.11
9.78	0	0	0		-0.12
9.77	0	0	0		-0.13
9.76	0	0	0		-0.14
9.75	2	19.5	0.000390778		-0.15
	5118	9.90045
