# Supplementary material for: Interaction Wave Functions and Interaction-Based Coherence and Entanglement in Complex Adaptive Systems
Source: Research Square preprint supplement (doi:10.21203/rs.3.rs-6846233/v1), 2025-06-16
Supplement: Supplementary file 601 [file 30612.xls]

## Sheet: Sheet1
10.12	40	404.8	0.01188		0.12
10.11	0	0	0		0.11
10.1	99	999.9	0.029403		0.1
10.09	0	0	0		0.09
10.08	88	887.04	0.026136		0.08
10.07	112	1127.84	0.033264		0.07
10.06	4	40.24	0.001188		0.06
10.05	136	1366.8	0.040392		0.05
10.04	107	1074.28	0.031779		0.04
10.03	86	862.58	0.025542		0.03
10.02	388	3887.76	0.115236		0.02
10.01	508	5085.08	0.150876		0.01
10	698	6980	0.207306		0
9.99	23	229.77	0.00683101		-0.01
9.98	156	1556.88	0.046332		-0.02
9.97	227	2263.19	0.0674191		-0.03
9.96	179	1782.84	0.0531631		-0.04
9.95	265	2636.75	0.0787051		-0.05
9.94	131	1302.14	0.038907		-0.06
9.93	40	397.2	0.01188		-0.07
9.92	0	0	0		-0.08
9.91	0	0	0		-0.09
9.9	80	792	0.02376		-0.1
	3367	10.0021
