# Supplementary material for: Interaction Wave Functions and Interaction-Based Coherence and Entanglement in Complex Adaptive Systems
Source: Research Square preprint supplement (doi:10.21203/rs.3.rs-6846233/v1), 2025-06-16
Supplement: Supplementary file 602 [file 30613.xls]

## Sheet: Sheet1
10.1	47	474.7	0.0125769		0.11
10.09	0	0	0		0.1
10.08	5	50.4	0.00133797		0.09
10.07	0	0	0		0.08
10.06	2	20.12	0.000535189		0.07
10.05	340	3417	0.0909821		0.06
10.04	43	431.72	0.0115066		0.05
10.03	0	0	0		0.04
10.02	40	400.8	0.0107038		0.03
10.01	7	70.07	0.00187316		0.02
10	581	5810	0.155472		0.01
9.99	462	4615.38	0.123629		0
9.98	964	9620.72	0.257961		-0.01
9.97	789	7866.33	0.211132		-0.02
9.96	457	4551.72	0.122291		-0.03
	3737	9.98902
