# Supplementary material for: Interaction Wave Functions and Interaction-Based Coherence and Entanglement in Complex Adaptive Systems
Source: Research Square preprint supplement (doi:10.21203/rs.3.rs-6846233/v1), 2025-06-16
Supplement: Supplementary file 603 [file 30616-20.xls]

## Sheet: Sheet1
0.2				21		21	4.2	0.00132979
0.19				12		12	2.28	0.000759878
0.18				0		0	0	0
0.17				5		5	0.85	0.000316616
0.16				21		21	3.36	0.00132979
0.15				18		18	2.7	0.00113982
0.14				130		130	18.2	0.00823202
0.13				9		9	1.17	0.000569909
0.12				40	24	64	7.68	0.00405268
0.11				111	54	165	18.15	0.0104483
0.1				20	128	148	14.8	0.00937183
0.09	114			149	240	503	45.27	0.0318516
0.08	14		89	1	10	114	9.12	0.00721884
0.07	75		62	21	0	158	11.06	0.0100051
0.06	15		238	117	30	400	24	0.0253293
0.05	494	93	0	23	37	647	32.35	0.0409701
0.04	357	15	238	0	237	847	33.88	0.0536348
0.03	225	273	32	8	59	597	17.91	0.037804
0.02	231	96	344	18	373	1062	21.24	0.0672492
0.01	204	98	159	232	2	695	6.95	0.0440096
-3.1225e-17	47	531	104	40	368	1090	-3.40353e-14	0.0690223
-0.01	0	168	145	596	1312	2221	-22.21	0.140641
-0.02	0	259	262	451	729	1701	-34.02	0.107713
-0.03	0	363	131	397	413	1304	-39.12	0.0825735
-0.04	0	146	103	1415	365	2029	-81.16	0.128483
-0.05	419	13	84	253	35	804	-40.2	0.0509119
-0.06	13		83			96	-5.76	0.00607903
-0.07	155		154			309	-21.63	0.0195669
-0.08	70		72			142	-11.36	0.00899189
-0.09	35		128			163	-14.67	0.0103217
-0.1	258					258	-25.8	0.0163374
-0.11	59					59	-6.49	0.00373607
						15792	-0.00172556
