# Supplementary material for: Interaction Wave Functions and Interaction-Based Coherence and Entanglement in Complex Adaptive Systems
Source: Research Square preprint supplement (doi:10.21203/rs.3.rs-6846233/v1), 2025-06-16
Supplement: Supplementary file 604 [file 30616.xls]

## Sheet: Sheet1
10.04	114	1144.56	0.0409336		0.09
10.03	14	140.42	0.00502693		0.08
10.02	75	751.5	0.02693		0.07
10.01	15	150.15	0.005386		0.06
10	494	4940	0.177379		0.05
9.99	357	3566.43	0.128187		0.04
9.98	225	2245.5	0.0807899		0.03
9.97	231	2303.07	0.0829443		0.02
9.96	204	2031.84	0.0732496		0.01
9.95	47	467.65	0.0168761		0
9.94	0	0	0		-0.01
9.93	0	0	0		-0.02
9.92	0	0	0		-0.03
9.91	0	0	0		-0.04
9.9	419	4148.1	0.150449		-0.05
9.89	13	128.57	0.00466786		-0.06
9.88	155	1531.4	0.0556553		-0.07
9.87	70	690.9	0.0251346		-0.08
9.86	35	345.1	0.0125673		-0.09
9.85	258	2541.3	0.0926391		-0.1
9.84	59	580.56	0.0211849		-0.11
	2785	9.94867
