# Supplementary material for: Interaction Wave Functions and Interaction-Based Coherence and Entanglement in Complex Adaptive Systems
Source: Research Square preprint supplement (doi:10.21203/rs.3.rs-6846233/v1), 2025-06-16
Supplement: Supplementary file 605 [file 30617.xls]

## Sheet: Sheet1
9.95	93	925.35	0.0452555		0.05
9.94	15	149.1	0.00729927		0.04
9.93	273	2710.89	0.132847		0.03
9.92	96	952.32	0.0467153		0.02
9.91	98	971.18	0.0476886		0.01
9.9	531	5256.9	0.258394		0
9.89	168	1661.52	0.0817518		-0.01
9.88	259	2558.92	0.126034		-0.02
9.87	363	3582.81	0.176642		-0.03
9.86	146	1439.56	0.0710462		-0.04
9.85	13	128.05	0.00632603		-0.05
	2055	9.89616
