# Supplementary material for: Interaction Wave Functions and Interaction-Based Coherence and Entanglement in Complex Adaptive Systems
Source: Research Square preprint supplement (doi:10.21203/rs.3.rs-6846233/v1), 2025-06-16
Supplement: Supplementary file 606 [file 30618.xls]

## Sheet: Sheet1
10.1	89	898.9	0.0366557		0.08
10.09	62	625.58	0.0255354		0.07
10.08	238	2399.04	0.0980231		0.06
10.07	0	0	0		0.05
10.06	238	2394.28	0.0980231		0.04
10.05	32	321.6	0.0131796		0.03
10.04	344	3453.76	0.14168		0.02
10.03	159	1594.77	0.065486		0.01
10.02	104	1042.08	0.0428336		0
10.01	145	1451.45	0.0597199		-0.01
10	262	2620	0.107908		-0.02
9.99	131	1308.69	0.0539539		-0.03
9.98	103	1027.94	0.0424217		-0.04
9.97	84	837.48	0.0345964		-0.05
9.96	83	826.68	0.0341845		-0.06
9.95	154	1532.3	0.0634267		-0.07
9.94	72	715.68	0.029654		-0.08
9.93	128	1271.04	0.0527183		-0.09
	2428	10.017
