# Supplementary material for: Interaction Wave Functions and Interaction-Based Coherence and Entanglement in Complex Adaptive Systems
Source: Research Square preprint supplement (doi:10.21203/rs.3.rs-6846233/v1), 2025-06-16
Supplement: Supplementary file 607 [file 30619.xls]

## Sheet: Sheet1
9.99	21	209.79	0.00511198		0.2
9.98	12	119.76	0.00292113		0.19
9.97	0	0	0		0.18
9.96	5	49.8	0.00121714		0.17
9.95	21	208.95	0.00511198		0.16
9.94	18	178.92	0.00438169		0.15
9.93	130	1290.9	0.0316456		0.14
9.92	9	89.28	0.00219085		0.13
9.91	40	396.4	0.0097371		0.12
9.9	111	1098.9	0.0270204		0.11
9.89	20	197.8	0.00486855		0.1
9.88	149	1472.12	0.0362707		0.09
9.87	1	9.87	0.000243427		0.08
9.86	21	207.06	0.00511198		0.07
9.85	117	1152.45	0.028481		0.06
9.84	23	226.32	0.00559883		0.05
9.83	0	0	0		0.04
9.82	8	78.56	0.00194742		0.03
9.81	18	176.58	0.00438169		0.02
9.8	232	2273.6	0.0564752		0.01
9.79	40	391.6	0.0097371		0
9.78	596	5828.88	0.145083		-0.01
9.77	451	4406.27	0.109786		-0.02
9.76	397	3874.72	0.0966407		-0.03
9.75	1415	13796.3	0.34445		-0.04
9.74	253	2464.22	0.0615871		-0.05
	4108	9.78554
