# Supplementary material for: Interaction Wave Functions and Interaction-Based Coherence and Entanglement in Complex Adaptive Systems
Source: Research Square preprint supplement (doi:10.21203/rs.3.rs-6846233/v1), 2025-06-16
Supplement: Supplementary file 608 [file 30620.xls]

## Sheet: Sheet1
9.78	24	234.72	0.00543478		0.12
9.77	54	527.58	0.0122283		0.11
9.76	128	1249.28	0.0289855		0.1
9.75	240	2340	0.0543478		0.09
9.74	10	97.4	0.00226449		0.08
9.73	0	0	0		0.07
9.72	30	291.6	0.00679348		0.06
9.71	37	359.27	0.00837862		0.05
9.7	237	2298.9	0.0536685		0.04
9.69	59	571.71	0.0133605		0.03
9.68	373	3610.64	0.0844656		0.02
9.67	2	19.34	0.000452899		0.01
9.66	368	3554.88	0.0833333		0
9.65	1312	12660.8	0.297101		-0.01
9.64	729	7027.56	0.165082		-0.02
9.63	413	3977.19	0.0935236		-0.03
9.62	365	3511.3	0.082654		-0.04
9.61	35	336.35	0.00792572		-0.05
	4416	9.66226
