# Supplementary material for: Interaction Wave Functions and Interaction-Based Coherence and Entanglement in Complex Adaptive Systems
Source: Research Square preprint supplement (doi:10.21203/rs.3.rs-6846233/v1), 2025-06-16
Supplement: Supplementary file 609 [file 30623-27.xls]

## Sheet: Sheet1
0.25				34		34	8.5	0.00191884
0.24				12		12	2.88	0.000677239
0.23				67		67	15.41	0.00378125
0.22				0		0	0	0
0.21				0		0	0	0
0.2				31		31	6.2	0.00174953
0.19				208	6	214	40.66	0.0120774
0.18				113	39	152	27.36	0.00857836
0.17				0	0	0	0	0
0.16				0	136	136	21.76	0.00767538
0.15				40	15	55	8.25	0.00310401
0.14				296	22	318	44.52	0.0179468
0.13				114	28	142	18.46	0.008014
0.12				30	92	122	14.64	0.00688526
0.11				106	33	139	15.29	0.00784469
0.1				23	157	180	18	0.0101586
0.09	88			517	93	698	62.82	0.0393927
0.08	186			45	82	313	25.04	0.0176647
0.07	356			22	51	429	30.03	0.0242113
0.06	164	11	26	121	413	735	44.1	0.0414809
0.05	134	48	36	25	0	243	12.15	0.0137141
0.04	130	216	148	325	52	871	34.84	0.0491563
0.03	138	464	202	239	0	1043	31.29	0.0588634
0.02	283	268	63	148	6	768	15.36	0.0433433
0.01	40	253	191	219	286	989	9.89	0.0558158
-8.67362e-17	121	189	322	19	156	807	-6.99961e-14	0.0455443
-0.01	262	29	194	125	48	658	-6.58	0.0371353
-0.02	469	72	288	117	60	1006	-20.12	0.0567752
-0.03	1038	250	20	114	100	1522	-45.66	0.0858965
-0.04	372	611	477	46	267	1773	-70.92	0.100062
-0.05	372	69	8	11	0	460	-23	0.0259608
-0.06		121		73	532	726	-43.56	0.040973
-0.07				91	982	1073	-75.11	0.0605565
-0.08				117	223	340	-27.2	0.0191884
-0.09				124	22	146	-13.14	0.00823974
-0.1				54		54	-5.4	0.00304758
-0.11				211		211	-23.21	0.0119081
-0.12				107		107	-12.84	0.00603872
-0.13				82		82	-10.66	0.0046278
-0.14				38		38	-5.32	0.00214459
-0.15				87		87	-13.05	0.00490998
-0.16				132		132	-21.12	0.00744963
-0.17				383		383	-65.11	0.0216152
-0.18				120		120	-21.6	0.00677239
-0.19				124		124	-23.56	0.00699814
-0.2				56		56	-11.2	0.00316045
-0.21				123		123	-25.83	0.0069417
						17719	-0.00320221
