# Supplementary material for: Interaction Wave Functions and Interaction-Based Coherence and Entanglement in Complex Adaptive Systems
Source: Research Square preprint supplement (doi:10.21203/rs.3.rs-6846233/v1), 2025-06-16
Supplement: Supplementary file 610 [file 30623-30.xls]

## Sheet: Sheet1
0.25				34			34	8.5	0.00155109
0.24				12			12	2.88	0.000547445
0.23				67			67	15.41	0.00305657
0.22				0			0	0	0
0.21				0		4	4	0.84	0.000182482
0.2				31		0	31	6.2	0.00141423
0.19				208	6	17	231	43.89	0.0105383
0.18				113	39	10	162	29.16	0.00739051
0.17				0	0	302	302	51.34	0.0137774
0.16				0	136	12	148	23.68	0.00675182
0.15				40	15	0	55	8.25	0.00250912
0.14				296	22	73	391	54.74	0.0178376
0.13				114	28	156	298	38.74	0.0135949
0.12				30	92	136	258	30.96	0.0117701
0.11				106	33	99	238	26.18	0.0108577
0.1				23	157	11	191	19.1	0.0087135
0.09	88			517	93	24	722	64.98	0.032938
0.08	186			45	82	73	386	30.88	0.0176095
0.07	356			22	51	70	499	34.93	0.0227646
0.06	164	11	26	121	413	10	745	44.7	0.0339872
0.05	134	48	36	25	0	13	256	12.8	0.0116788
0.04	130	216	148	325	52	0	871	34.84	0.0397354
0.03	138	464	202	239	0	0	1043	31.29	0.0475821
0.02	283	268	63	148	6	642	1410	28.2	0.0643248
0.01	40	253	191	219	286	183	1172	11.72	0.0534672
-8.67362e-17	121	189	322	19	156	62	869	-7.53737e-14	0.0396442
-0.01	262	29	194	125	48	71	729	-7.29	0.0332573
-0.02	469	72	288	117	60	111	1117	-22.34	0.050958
-0.03	1038	250	20	114	100	820	2342	-70.26	0.106843
-0.04	372	611	477	46	267	173	1946	-77.84	0.0887774
-0.05	372	69	8	11	0	189	649	-32.45	0.0296077
-0.06		121		73	532	0	726	-43.56	0.0331204
-0.07				91	982	30	1103	-77.21	0.0503193
-0.08				117	223	0	340	-27.2	0.0155109
-0.09				124	22	0	146	-13.14	0.00666058
-0.1				54		0	54	-5.4	0.0024635
-0.11				211		0	211	-23.21	0.00962591
-0.12				107		10	117	-14.04	0.00533759
-0.13				82		900	982	-127.66	0.0447993
-0.14				38			38	-5.32	0.00173358
-0.15				87			87	-13.05	0.00396898
-0.16				132			132	-21.12	0.0060219
-0.17				383			383	-65.11	0.0174726
-0.18				120			120	-21.6	0.00547445
-0.19				124			124	-23.56	0.00565693
-0.2				56			56	-11.2	0.00255474
-0.21				123			123	-25.83	0.00561131
							21920	-0.00338412
