# Supplementary material for: Interaction Wave Functions and Interaction-Based Coherence and Entanglement in Complex Adaptive Systems
Source: Research Square preprint supplement (doi:10.21203/rs.3.rs-6846233/v1), 2025-06-16
Supplement: Supplementary file 611 [file 30623.xls]

## Sheet: Sheet1
9.62	88	846.56	0.0211895		0.09
9.61	186	1787.46	0.0447869		0.08
9.6	356	3417.6	0.0857212		0.07
9.59	164	1572.76	0.0394895		0.06
9.58	134	1283.72	0.0322658		0.05
9.57	130	1244.1	0.0313027		0.04
9.56	138	1319.28	0.033229		0.03
9.55	283	2702.65	0.0681435		0.02
9.54	40	381.6	0.00963159		0.01
9.53	121	1153.13	0.0291356		0
9.52	262	2494.24	0.0630869		-0.01
9.51	469	4460.19	0.11293		-0.02
9.5	1038	9861	0.24994		-0.03
9.49	372	3530.28	0.0895738		-0.04
9.48	372	3526.56	0.0895738		-0.05
	4153	9.53073
