# Supplementary material for: Interaction Wave Functions and Interaction-Based Coherence and Entanglement in Complex Adaptive Systems
Source: Research Square preprint supplement (doi:10.21203/rs.3.rs-6846233/v1), 2025-06-16
Supplement: Supplementary file 612 [file 30624.xls]

## Sheet: Sheet1
9.6	11	105.6	0.00422914		0.06
9.59	48	460.32	0.0184544		0.05
9.58	216	2069.28	0.083045		0.04
9.57	464	4440.48	0.178393		0.03
9.56	268	2562.08	0.103037		0.02
9.55	253	2416.15	0.0972703		0.01
9.54	189	1803.06	0.0726644		0
9.53	29	276.37	0.0111496		-0.01
9.52	72	685.44	0.0276817		-0.02
9.51	250	2377.5	0.0961169		-0.03
9.5	611	5804.5	0.23491		-0.04
9.49	69	654.81	0.0265283		-0.05
9.48	121	1147.08	0.0465206		-0.06
	2601	9.53582
