# Supplementary material for: Interaction Wave Functions and Interaction-Based Coherence and Entanglement in Complex Adaptive Systems
Source: Research Square preprint supplement (doi:10.21203/rs.3.rs-6846233/v1), 2025-06-16
Supplement: Supplementary file 613 [file 30625.xls]

## Sheet: Sheet1
9.58	26	249.08	0.0131646		0.06
9.57	36	344.52	0.0182278		0.05
9.56	148	1414.88	0.0749367		0.04
9.55	202	1929.1	0.102278		0.03
9.54	63	601.02	0.0318987		0.02
9.53	191	1820.23	0.0967089		0.01
9.52	322	3065.44	0.163038		0
9.51	194	1844.94	0.0982278		-0.01
9.5	288	2736	0.145823		-0.02
9.49	20	189.8	0.0101266		-0.03
9.48	477	4521.96	0.241519		-0.04
9.47	8	75.76	0.00405063		-0.05
	1975	9.51531
