# Supplementary material for: Interaction Wave Functions and Interaction-Based Coherence and Entanglement in Complex Adaptive Systems
Source: Research Square preprint supplement (doi:10.21203/rs.3.rs-6846233/v1), 2025-06-16
Supplement: Supplementary file 614 [file 30626.xls]

## Sheet: Sheet1
9.96	34	338.64	0.00668108		0.25
9.95	12	119.4	0.00235803		0.24
9.94	67	665.98	0.0131657		0.23
9.93	0	0	0		0.22
9.92	0	0	0		0.21
9.91	31	307.21	0.00609157		0.2
9.9	208	2059.2	0.0408725		0.19
9.89	113	1117.57	0.0222048		0.18
9.88	0	0	0		0.17
9.87	0	0	0		0.16
9.86	40	394.4	0.00786009		0.15
9.85	296	2915.6	0.0581647		0.14
9.84	114	1121.76	0.0224013		0.13
9.83	30	294.9	0.00589507		0.12
9.82	106	1040.92	0.0208292		0.11
9.81	23	225.63	0.00451955		0.1
9.8	517	5066.6	0.101592		0.09
9.79	45	440.55	0.0088426		0.08
9.78	22	215.16	0.00432305		0.07
9.77	121	1182.17	0.0237768		0.06
9.76	25	244	0.00491256		0.05
9.75	325	3168.75	0.0638632		0.04
9.74	239	2327.86	0.046964		0.03
9.73	148	1440.04	0.0290823		0.02
9.72	219	2128.68	0.043034		0.01
9.71	19	184.49	0.00373354		0
9.7	125	1212.5	0.0245628		-0.01
9.69	117	1133.73	0.0229908		-0.02
9.68	114	1103.52	0.0224013		-0.03
9.67	46	444.82	0.0090391		-0.04
9.66	11	106.26	0.00216152		-0.05
9.65	73	704.45	0.0143447		-0.06
9.64	91	877.24	0.0178817		-0.07
9.63	117	1126.71	0.0229908		-0.08
9.62	124	1192.88	0.0243663		-0.09
9.61	54	518.94	0.0106111		-0.1
9.6	211	2025.6	0.041462		-0.11
9.59	107	1026.13	0.0210257		-0.12
9.58	82	785.56	0.0161132		-0.13
9.57	38	363.66	0.00746709		-0.14
9.56	87	831.72	0.0170957		-0.15
9.55	132	1260.6	0.0259383		-0.16
9.54	383	3653.82	0.0752604		-0.17
9.53	120	1143.6	0.0235803		-0.18
9.52	124	1180.48	0.0243663		-0.19
9.51	56	532.56	0.0110041		-0.2
9.5	123	1168.5	0.0241698		-0.21
	5089	9.70579
