# Supplementary material for: Interaction Wave Functions and Interaction-Based Coherence and Entanglement in Complex Adaptive Systems
Source: Research Square preprint supplement (doi:10.21203/rs.3.rs-6846233/v1), 2025-06-16
Supplement: Supplementary file 615 [file 30627.xls]

## Sheet: Sheet1
9.73	6	58.38	0.00153807		0.19
9.72	39	379.08	0.00999744		0.18
9.71	0	0	0		0.17
9.7	136	1319.2	0.0348629		0.16
9.69	15	145.35	0.00384517		0.15
9.68	22	212.96	0.00563958		0.14
9.67	28	270.76	0.00717765		0.13
9.66	92	888.72	0.0235837		0.12
9.65	33	318.45	0.00845937		0.11
9.64	157	1513.48	0.0402461		0.1
9.63	93	895.59	0.02384		0.09
9.62	82	788.84	0.0210203		0.08
9.61	51	490.11	0.0130736		0.07
9.6	413	3964.8	0.10587		0.06
9.59	0	0	0		0.05
9.58	52	498.16	0.0133299		0.04
9.57	0	0	0		0.03
9.56	6	57.36	0.00153807		0.02
9.55	286	2731.3	0.0733145		0.01
9.54	156	1488.24	0.0399897		0
9.53	48	457.44	0.0123045		-0.01
9.52	60	571.2	0.0153807		-0.02
9.51	100	951	0.0256345		-0.03
9.5	267	2536.5	0.068444		-0.04
9.49	0	0	0		-0.05
9.48	532	5043.36	0.136375		-0.06
9.47	982	9299.54	0.25173		-0.07
9.46	223	2109.58	0.0571648		-0.08
9.45	22	207.9	0.00563958		-0.09
	3901	9.53532
