# Supplementary material for: Interaction Wave Functions and Interaction-Based Coherence and Entanglement in Complex Adaptive Systems
Source: Research Square preprint supplement (doi:10.21203/rs.3.rs-6846233/v1), 2025-06-16
Supplement: Supplementary file 616 [file 30630.xls]

## Sheet: Sheet1
9.54	4	38.16	0.000952154		0.21
9.53	0	0	0		0.2
9.52	17	161.84	0.00404666		0.19
9.51	10	95.1	0.00238039		0.18
9.5	302	2869	0.0718876		0.17
9.49	12	113.88	0.00285646		0.16
9.48	0	0	0		0.15
9.47	73	691.31	0.0173768		0.14
9.46	156	1475.76	0.037134		0.13
9.45	136	1285.2	0.0323732		0.12
9.44	99	934.56	0.0235658		0.11
9.43	11	103.73	0.00261842		0.1
9.42	24	226.08	0.00571293		0.09
9.41	73	686.93	0.0173768		0.08
9.4	70	658	0.0166627		0.07
9.39	10	93.9	0.00238039		0.06
9.38	13	121.94	0.0030945		0.05
9.37	0	0	0		0.04
9.36	0	0	0		0.03
9.35	642	6002.7	0.152821		0.02
9.34	183	1709.22	0.0435611		0.01
9.33	62	578.46	0.0147584		0
9.32	71	661.72	0.0169007		-0.01
9.31	111	1033.41	0.0264223		-0.02
9.3	820	7626	0.195192		-0.03
9.29	173	1607.17	0.0411807		-0.04
9.28	189	1753.92	0.0449893		-0.05
9.27	0	0	0		-0.06
9.26	30	277.8	0.00714116		-0.07
9.25	0	0	0		-0.08
9.24	0	0	0		-0.09
9.23	0	0	0		-0.1
9.22	0	0	0		-0.11
9.21	10	92.1	0.00238039		-0.12
9.2	900	8280	0.214235		-0.13
	4201	9.32585
