# Supplementary material for: Interaction Wave Functions and Interaction-Based Coherence and Entanglement in Complex Adaptive Systems
Source: Research Square preprint supplement (doi:10.21203/rs.3.rs-6846233/v1), 2025-06-16
Supplement: Supplementary file 617 [file 30602-06.xls]

## Sheet: Sheet1
0.16	28				395	423	67.68	0.00433739
0.15	12				282	294	44.1	0.00301464
0.14	83	242	10		979	1314	183.96	0.0134736
0.13	320	173	168		266	927	120.51	0.00950535
0.12	34	843	87		1658	2622	314.64	0.0268857
0.11	88	853	895	106	1208	3150	346.5	0.0322997
0.1	117	1667	59	548	251	2642	264.2	0.0270908
0.09	18	1752	243	687	245	2945	265.05	0.0301977
0.08	420	574	208	1008	413	2623	209.84	0.0268959
0.07	228	828	266	439	1458	3219	225.33	0.0330073
0.06	321	551	492	874	216	2454	147.24	0.025163
0.05	260	588	479	361	240	1928	96.4	0.0197695
0.04	925	2139	386	443	776	4669	186.76	0.0478754
0.03	2434	12	495	349	1780	5070	152.1	0.0519872
0.02	516	60	567	267	3088	4498	89.96	0.046122
0.01	898	0	2658	1429	3663	8648	86.48	0.0886756
0	1910	25	378	791	2894	5998	0	0.0615028
-0.01	1554	65	570	1047	2538	5774	-57.74	0.0592059
-0.02	3118	125	63	244	1885	5435	-108.7	0.0557299
-0.03	1058	121	479	363	1805	3826	-114.78	0.0392314
-0.04	1899	189	1056	933	291	4368	-174.72	0.044789
-0.05	996	198	248	511	1676	3629	-181.45	0.0372114
-0.06	984	592	212	64	460	2312	-138.72	0.023707
-0.07	821	330	79	417	725	2372	-166.04	0.0243222
-0.08	5	1115	300	100	1101	2621	-209.68	0.0268754
-0.09	56	208	641	1939	10	2854	-256.86	0.0292646
-0.1		689	242	283	740	1954	-195.4	0.0200361
-0.11		816	375	104	10	1305	-143.55	0.0133813
-0.12		3267	97	88	12	3464	-415.68	0.0355195
-0.13		205	91	174	358	828	-107.64	0.00849022
-0.14		31		205	402	638	-89.32	0.00654198
-0.15		188		4	19	211	-31.65	0.00216357
-0.16		403		7	36	446	-71.36	0.00457323
-0.17		189		65	132	386	-65.62	0.003958
-0.18		45			912	957	-172.26	0.00981297
-0.19					95	95	-18.05	0.000974119
-0.2					306	306	-61.2	0.00313769
-0.21					7	7	-1.47	7.17772e-05
-0.22					72	72	-15.84	0.00073828
-0.23					5	5	-1.15	5.12694e-05
-0.24					0	0	0	0
-0.25					31	31	-7.75	0.00031787
-0.26					6	6	-1.56	6.15233e-05
-0.27					179	179	-48.33	0.00183545
-0.28					19	19	-5.32	0.000194824
						97524	-0.00062641
