# Supplementary material for: Interaction Wave Functions and Interaction-Based Coherence and Entanglement in Complex Adaptive Systems
Source: Research Square preprint supplement (doi:10.21203/rs.3.rs-6846233/v1), 2025-06-16
Supplement: Supplementary file 618 [file 30602.xls]

## Sheet: Sheet1
9.18	28	257.04	0.00146574		0.16
9.17	12	110.04	0.000628174		0.15
9.16	83	760.28	0.00434487		0.14
9.15	320	2928	0.0167513		0.13
9.14	34	310.76	0.00177983		0.12
9.13	88	803.44	0.00460661		0.11
9.12	117	1067.04	0.00612469		0.1
9.11	18	163.98	0.00094226		0.09
9.1	420	3822	0.0219861		0.08
9.09	228	2072.52	0.0119353		0.07
9.08	321	2914.68	0.0168036		0.06
9.07	260	2358.2	0.0136104		0.05
9.06	925	8380.5	0.0484217		0.04
9.05	2434	22027.7	0.127415		0.03
9.04	516	4664.64	0.0270115		0.02
9.03	898	8108.94	0.0470083		0.01
9.02	1910	17228.2	0.0999843		0
9.01	1554	14001.5	0.0813485		-0.01
9	3118	28062	0.16322		-0.02
8.99	1058	9511.42	0.055384		-0.03
8.98	1899	17053	0.0994085		-0.04
8.97	996	8934.12	0.0521384		-0.05
8.96	984	8816.64	0.0515102		-0.06
8.95	821	7347.95	0.0429775		-0.07
8.94	5	44.7	0.000261739		-0.08
8.93	56	500.08	0.00293148		-0.09
	19103	9.01688
