# Supplementary material for: Interaction Wave Functions and Interaction-Based Coherence and Entanglement in Complex Adaptive Systems
Source: Research Square preprint supplement (doi:10.21203/rs.3.rs-6846233/v1), 2025-06-16
Supplement: Supplementary file 619 [file 30603.xls]

## Sheet: Sheet1
9.1	242	2202.2	0.0126814		0.14
9.09	173	1572.57	0.00906566		0.13
9.08	843	7654.44	0.0441754		0.12
9.07	853	7736.71	0.0446995		0.11
9.06	1667	15103	0.0873552		0.1
9.05	1752	15855.6	0.0918095		0.09
9.04	574	5188.96	0.0300791		0.08
9.03	828	7476.84	0.0433894		0.07
9.02	551	4970.02	0.0288739		0.06
9.01	588	5297.88	0.0308128		0.05
9	2139	19251	0.112089		0.04
8.99	12	107.88	0.000628832		0.03
8.98	60	538.8	0.00314416		0.02
8.97	0	0	0		0.01
8.96	25	224	0.00131007		0
8.95	65	581.75	0.00340617		-0.01
8.94	125	1117.5	0.00655033		-0.02
8.93	121	1080.53	0.00634072		-0.03
8.92	189	1685.88	0.0099041		-0.04
8.91	198	1764.18	0.0103757		-0.05
8.9	592	5268.8	0.0310224		-0.06
8.89	330	2933.7	0.0172929		-0.07
8.88	1115	9901.2	0.058429		-0.08
8.87	208	1844.96	0.0108998		-0.09
8.86	689	6104.54	0.0361054		-0.1
8.85	816	7221.6	0.0427606		-0.11
8.84	3267	28880.3	0.171199		-0.12
8.83	205	1810.15	0.0107425		-0.13
8.82	31	273.42	0.00162448		-0.14
8.81	188	1656.28	0.0098517		-0.15
8.8	403	3546.4	0.0211183		-0.16
8.79	189	1661.31	0.0099041		-0.17
8.78	45	395.1	0.00235812		-0.18
	19083	8.95601
