# Supplementary material for: Interaction Wave Functions and Interaction-Based Coherence and Entanglement in Complex Adaptive Systems
Source: Research Square preprint supplement (doi:10.21203/rs.3.rs-6846233/v1), 2025-06-16
Supplement: Supplementary file 620 [file 30604.xls]

## Sheet: Sheet1
9.03	10	90.3	0.000844309		0.14
9.02	168	1515.36	0.0141844		0.13
9.01	87	783.87	0.00734549		0.12
9	895	8055	0.0755657		0.11
8.99	59	530.41	0.00498143		0.1
8.98	243	2182.14	0.0205167		0.09
8.97	208	1865.76	0.0175616		0.08
8.96	266	2383.36	0.0224586		0.07
8.95	492	4403.4	0.04154		0.06
8.94	479	4282.26	0.0404424		0.05
8.93	386	3446.98	0.0325903		0.04
8.92	495	4415.4	0.0417933		0.03
8.91	567	5051.97	0.0478723		0.02
8.9	2658	23656.2	0.224417		0.01
8.89	378	3360.42	0.0319149		0
8.88	570	5061.6	0.0481256		-0.01
8.87	63	558.81	0.00531915		-0.02
8.86	479	4243.94	0.0404424		-0.03
8.85	1056	9345.6	0.0891591		-0.04
8.84	248	2192.32	0.0209389		-0.05
8.83	212	1871.96	0.0178994		-0.06
8.82	79	696.78	0.00667004		-0.07
8.81	300	2643	0.0253293		-0.08
8.8	641	5640.8	0.0541202		-0.09
8.79	242	2127.18	0.0204323		-0.1
8.78	375	3292.5	0.0316616		-0.11
8.77	97	850.69	0.0081898		-0.12
8.76	91	797.16	0.00768322		-0.13
	11844	8.89439
