# Supplementary material for: Interaction Wave Functions and Interaction-Based Coherence and Entanglement in Complex Adaptive Systems
Source: Research Square preprint supplement (doi:10.21203/rs.3.rs-6846233/v1), 2025-06-16
Supplement: Supplementary file 621 [file 30605.xls]

## Sheet: Sheet1
9.1	106	964.6	0.00765343		0.11
9.09	548	4981.32	0.0395668		0.1
9.08	687	6237.96	0.0496029		0.09
9.07	1008	9142.56	0.0727798		0.08
9.06	439	3977.34	0.0316968		0.07
9.05	874	7909.7	0.0631047		0.06
9.04	361	3263.44	0.026065		0.05
9.03	443	4000.29	0.0319856		0.04
9.02	349	3147.98	0.0251986		0.03
9.01	267	2405.67	0.019278		0.02
9	1429	12861	0.103177		0.01
8.99	791	7111.09	0.0571119		0
8.98	1047	9402.06	0.0755957		-0.01
8.97	244	2188.68	0.0176173		-0.02
8.96	363	3252.48	0.0262094		-0.03
8.95	933	8350.35	0.0673646		-0.04
8.94	511	4568.34	0.0368953		-0.05
8.93	64	571.52	0.00462094		-0.06
8.92	417	3719.64	0.0301083		-0.07
8.91	100	891	0.00722022		-0.08
8.9	1939	17257.1	0.14		-0.09
8.89	283	2515.87	0.0204332		-0.1
8.88	104	923.52	0.00750903		-0.11
8.87	88	780.56	0.00635379		-0.12
8.86	174	1541.64	0.0125632		-0.13
8.85	205	1814.25	0.0148014		-0.14
8.84	4	35.36	0.000288809		-0.15
8.83	7	61.81	0.000505415		-0.16
8.82	65	573.3	0.00469314		-0.17
	13850	8.98559
