# Supplementary material for: Interaction Wave Functions and Interaction-Based Coherence and Entanglement in Complex Adaptive Systems
Source: Research Square preprint supplement (doi:10.21203/rs.3.rs-6846233/v1), 2025-06-16
Supplement: Supplementary file 622 [file 30606.xls]

## Sheet: Sheet1
9.34	395	3689.3	0.0117406		0.16
9.33	282	2631.06	0.00838188		0.15
9.32	979	9124.28	0.0290988		0.14
9.31	266	2476.46	0.00790631		0.13
9.3	1658	15419.4	0.0492807		0.12
9.29	1208	11222.3	0.0359054		0.11
9.28	251	2329.28	0.00746047		0.1
9.27	245	2271.15	0.00728213		0.09
9.26	413	3824.38	0.0122756		0.08
9.25	1458	13486.5	0.0433361		0.07
9.24	216	1995.84	0.00642016		0.06
9.23	240	2215.2	0.00713352		0.05
9.22	776	7154.72	0.023065		0.04
9.21	1780	16393.8	0.0529069		0.03
9.2	3088	28409.6	0.0917846		0.02
9.19	3663	33663	0.108875		0.01
9.18	2894	26566.9	0.0860183		0
9.17	2538	23273.5	0.0754369		-0.01
9.16	1885	17266.6	0.0560278		-0.02
9.15	1805	16515.8	0.05365		-0.03
9.14	291	2659.74	0.00864939		-0.04
9.13	1676	15301.9	0.0498157		-0.05
9.12	460	4195.2	0.0136726		-0.06
9.11	725	6604.75	0.0215492		-0.07
9.1	1101	10019.1	0.032725		-0.08
9.09	10	90.9	0.00029723		-0.09
9.08	740	6719.2	0.021995		-0.1
9.07	10	90.7	0.00029723		-0.11
9.06	12	108.72	0.000356676		-0.12
9.05	358	3239.9	0.0106408		-0.13
9.04	402	3634.08	0.0119486		-0.14
9.03	19	171.57	0.000564737		-0.15
9.02	36	324.72	0.00107003		-0.16
9.01	132	1189.32	0.00392343		-0.17
9	912	8208	0.0271074		-0.18
8.99	95	854.05	0.00282368		-0.19
8.98	306	2747.88	0.00909523		-0.2
8.97	7	62.79	0.000208061		-0.21
8.96	72	645.12	0.00214005		-0.22
8.95	5	44.75	0.000148615		-0.23
8.94	0	0	0		-0.24
8.93	31	276.83	0.000921412		-0.25
8.92	6	53.52	0.000178338		-0.26
8.91	179	1594.89	0.00532041		-0.27
8.9	19	169.1	0.000564737		-0.28
	33644	9.18249
