# Supplementary material for: Interaction Wave Functions and Interaction-Based Coherence and Entanglement in Complex Adaptive Systems
Source: Research Square preprint supplement (doi:10.21203/rs.3.rs-6846233/v1), 2025-06-16
Supplement: Supplementary file 623 [file 30609-13.xls]

## Sheet: Sheet1
0.34	146					146	49.64	0.00283677
0.33	155					155	51.15	0.00301164
0.32	55					55	17.6	0.00106865
0.31	11					11	3.41	0.000213729
0.3	115					115	34.5	0.00223444
0.29	543					543	157.47	0.0105504
0.28	541					541	151.48	0.0105116
0.27	176					176	47.52	0.00341967
0.26	439					439	114.14	0.00852974
0.25	109					109	27.25	0.00211786
0.24	252					252	60.48	0.00489634
0.23	62					62	14.26	0.00120466
0.22	531					531	116.82	0.0103173
0.21	172					172	36.12	0.00334195
0.2	356					356	71.2	0.00691705
0.19	109					109	20.71	0.00211786
0.18	1					1	0.18	1.94299e-05
0.17	29					29	4.93	0.000563468
0.16	10					10	1.6	0.000194299
0.15	38					38	5.7	0.000738337
0.14	366					366	51.24	0.00711135
0.13	33				85	118	15.34	0.00229273
0.12	313	50		160	163	686	82.32	0.0133289
0.11	358	52		156	73	639	70.29	0.0124157
0.1	641	333		32	280	1286	128.6	0.0249869
0.09	659	330		267	6	1262	113.58	0.0245206
0.08	428	870		116	194	1608	128.64	0.0312433
0.07	444	108	44	184	0	780	54.6	0.0151553
0.06	275	603	98	191	114	1281	76.86	0.0248897
0.05	294	268	790	262	28	1642	82.1	0.0319039
0.04	1490	131	712	211	229	2773	110.92	0.0538792
0.03	1057	169	817	1048	110	3201	96.03	0.0621952
0.02	755	136	593	130	218	1832	36.64	0.0355956
0.01	269	144	722	591	409	2135	21.35	0.0414829
-1.42247e-16	465	542	639	315	461	2422	-3.44523e-13	0.0470593
-0.01	601	589	348	70	411	2019	-20.19	0.039229
-0.02	278	1863	738	481	871	4231	-84.62	0.082208
-0.03	14	360	99	303	439	1215	-36.45	0.0236074
-0.04	321	701	182	768	633	2605	-104.2	0.050615
-0.05	265	308	361	543	247	1724	-86.2	0.0334972
-0.06	1490	1593	32	545	425	4085	-245.1	0.0793712
-0.07	90	0	115	387	125	717	-50.19	0.0139313
-0.08	347	0	158			505	-40.4	0.00981211
-0.09	0	0	85			85	-7.65	0.00165154
-0.1	0	40	137			177	-17.7	0.0034391
-0.11	276	0	269			545	-59.95	0.0105893
-0.12	235	244	4			483	-57.96	0.00938465
-0.13	317		42			359	-46.67	0.00697534
-0.14	1206					1206	-168.84	0.0234325
-0.15	542					542	-81.3	0.010531
-0.16	1901					1901	-304.16	0.0369363
-0.17	37					37	-6.29	0.000718907
-0.18	397					397	-71.46	0.00771368
-0.19	180					180	-34.2	0.00349739
-0.2	439					439	-87.8	0.00852974
-0.21	1305					1305	-274.05	0.0253561
-0.22	319					319	-70.18	0.00619815
-0.23	144					144	-33.12	0.00279791
-0.24	366					366	-87.84	0.00711135
						51467	-0.000424544
