# Supplementary material for: Interaction Wave Functions and Interaction-Based Coherence and Entanglement in Complex Adaptive Systems
Source: Research Square preprint supplement (doi:10.21203/rs.3.rs-6846233/v1), 2025-06-16
Supplement: Supplementary file 624 [file 30609.xls]

## Sheet: Sheet1
9.3	146	1357.8	0.00641279		0.34
9.29	155	1439.95	0.0068081		0.33
9.28	55	510.4	0.00241578		0.32
9.27	11	101.97	0.000483155		0.31
9.26	115	1064.9	0.00505117		0.3
9.25	543	5022.75	0.0238503		0.29
9.24	541	4998.84	0.0237625		0.28
9.23	176	1624.48	0.00773049		0.27
9.22	439	4047.58	0.0192823		0.26
9.21	109	1003.89	0.00478763		0.25
9.2	252	2318.4	0.0110687		0.24
9.19	62	569.78	0.00272324		0.23
9.18	531	4874.58	0.0233232		0.22
9.17	172	1577.24	0.00755479		0.21
9.16	356	3260.96	0.0156367		0.2
9.15	109	997.35	0.00478763		0.19
9.14	1	9.14	4.39232e-05		0.18
9.13	29	264.77	0.00127377		0.17
9.12	10	91.2	0.000439232		0.16
9.11	38	346.18	0.00166908		0.15
9.1	366	3330.6	0.0160759		0.14
9.09	33	299.97	0.00144947		0.13
9.08	313	2842.04	0.013748		0.12
9.07	358	3247.06	0.0157245		0.11
9.06	641	5807.46	0.0281548		0.1
9.05	659	5963.95	0.0289454		0.09
9.04	428	3869.12	0.0187991		0.08
9.03	444	4009.32	0.0195019		0.07
9.02	275	2480.5	0.0120789		0.06
9.01	294	2648.94	0.0129134		0.05
9	1490	13410	0.0654456		0.04
8.99	1057	9502.43	0.0464268		0.03
8.98	755	6779.9	0.033162		0.02
8.97	269	2412.93	0.0118153		0.01
8.96	465	4166.4	0.0204243		0
8.95	601	5378.95	0.0263979		-0.01
8.94	278	2485.32	0.0122107		-0.02
8.93	14	125.02	0.000614925		-0.03
8.92	321	2863.32	0.0140994		-0.04
8.91	265	2361.15	0.0116397		-0.05
8.9	1490	13261	0.0654456		-0.06
8.89	90	800.1	0.00395309		-0.07
8.88	347	3081.36	0.0152414		-0.08
8.87	0	0	0		-0.09
8.86	0	0	0		-0.1
8.85	276	2442.6	0.0121228		-0.11
8.84	235	2077.4	0.010322		-0.12
8.83	317	2799.11	0.0139237		-0.13
8.82	1206	10636.9	0.0529714		-0.14
8.81	542	4775.02	0.0238064		-0.15
8.8	1901	16728.8	0.083498		-0.16
8.79	37	325.23	0.00162516		-0.17
8.78	397	3485.66	0.0174375		-0.18
8.77	180	1578.6	0.00790618		-0.19
8.76	439	3845.64	0.0192823		-0.2
8.75	1305	11418.8	0.0573198		-0.21
8.74	319	2788.06	0.0140115		-0.22
8.73	144	1257.12	0.00632494		-0.23
8.72	366	3191.52	0.0160759		-0.24
	22767	8.95856
