# Supplementary material for: Interaction Wave Functions and Interaction-Based Coherence and Entanglement in Complex Adaptive Systems
Source: Research Square preprint supplement (doi:10.21203/rs.3.rs-6846233/v1), 2025-06-16
Supplement: Supplementary file 625 [file 30610.xls]

## Sheet: Sheet1
8.84	50	442	0.00529998		0.12
8.83	52	459.16	0.00551198		0.11
8.82	333	2937.06	0.0352979		0.1
8.81	330	2907.3	0.0349799		0.09
8.8	870	7656	0.0922196		0.08
8.79	108	949.32	0.011448		0.07
8.78	603	5294.34	0.0639177		0.06
8.77	268	2350.36	0.0284079		0.05
8.76	131	1147.56	0.0138859		0.04
8.75	169	1478.75	0.0179139		0.03
8.74	136	1188.64	0.0144159		0.02
8.73	144	1257.12	0.0152639		0.01
8.72	542	4726.24	0.0574518		0
8.71	589	5130.19	0.0624338		-0.01
8.7	1863	16208.1	0.197477		-0.02
8.69	360	3128.4	0.0381598		-0.03
8.68	701	6084.68	0.0743057		-0.04
8.67	308	2670.36	0.0326479		-0.05
8.66	1593	13795.4	0.168857		-0.06
8.65	0	0	0		-0.07
8.64	0	0	0		-0.08
8.63	0	0	0		-0.09
8.62	40	344.8	0.00423998		-0.1
8.61	0	0	0		-0.11
8.6	244	2098.4	0.0258639		-0.12
	9434	8.71891
