# Supplementary material for: Interaction Wave Functions and Interaction-Based Coherence and Entanglement in Complex Adaptive Systems
Source: Research Square preprint supplement (doi:10.21203/rs.3.rs-6846233/v1), 2025-06-16
Supplement: Supplementary file 626 [file 30611.xls]

## Sheet: Sheet1
8.92	44	392.48	0.00629921		0.07
8.91	98	873.18	0.0140301		0.06
8.9	790	7031	0.113099		0.05
8.89	712	6329.68	0.101933		0.04
8.88	817	7254.96	0.116965		0.03
8.87	593	5259.91	0.0848962		0.02
8.86	722	6396.92	0.103364		0.01
8.85	639	5655.15	0.0914817		0
8.84	348	3076.32	0.049821		-0.01
8.83	738	6516.54	0.105655		-0.02
8.82	99	873.18	0.0141732		-0.03
8.81	182	1603.42	0.0260558		-0.04
8.8	361	3176.8	0.0516822		-0.05
8.79	32	281.28	0.00458125		-0.06
8.78	115	1009.7	0.0164639		-0.07
8.77	158	1385.66	0.0226199		-0.08
8.76	85	744.6	0.0121689		-0.09
8.75	137	1198.75	0.0196135		-0.1
8.74	269	2351.06	0.0385111		-0.11
8.73	4	34.92	0.000572656		-0.12
8.72	42	366.24	0.00601288		-0.13
	6985	8.84921
