# Supplementary material for: Interaction Wave Functions and Interaction-Based Coherence and Entanglement in Complex Adaptive Systems
Source: Research Square preprint supplement (doi:10.21203/rs.3.rs-6846233/v1), 2025-06-16
Supplement: Supplementary file 627 [file 30612.xls]

## Sheet: Sheet1
8.99	160	1438.4	0.0236686		0.12
8.98	156	1400.88	0.0230769		0.11
8.97	32	287.04	0.00473373		0.1
8.96	267	2392.32	0.039497		0.09
8.95	116	1038.2	0.0171598		0.08
8.94	184	1644.96	0.0272189		0.07
8.93	191	1705.63	0.0282544		0.06
8.92	262	2337.04	0.0387574		0.05
8.91	211	1880.01	0.031213		0.04
8.9	1048	9327.2	0.15503		0.03
8.89	130	1155.7	0.0192308		0.02
8.88	591	5248.08	0.087426		0.01
8.87	315	2794.05	0.0465976		0
8.86	70	620.2	0.010355		-0.01
8.85	481	4256.85	0.0711538		-0.02
8.84	303	2678.52	0.0448225		-0.03
8.83	768	6781.44	0.113609		-0.04
8.82	543	4789.26	0.0803254		-0.05
8.81	545	4801.45	0.0806213		-0.06
8.8	387	3405.6	0.0572485		-0.07
	6760	8.8732
