# Supplementary material for: Interaction Wave Functions and Interaction-Based Coherence and Entanglement in Complex Adaptive Systems
Source: Research Square preprint supplement (doi:10.21203/rs.3.rs-6846233/v1), 2025-06-16
Supplement: Supplementary file 628 [file 30613.xls]

## Sheet: Sheet1
8.95	85	760.75	0.0153958		0.13
8.94	163	1457.22	0.0295236		0.12
8.93	73	651.89	0.0132222		0.11
8.92	280	2497.6	0.0507155		0.1
8.91	6	53.46	0.00108676		0.09
8.9	194	1726.6	0.0351386		0.08
8.89	0	0	0		0.07
8.88	114	1012.32	0.0206484		0.06
8.87	28	248.36	0.00507155		0.05
8.86	229	2028.94	0.041478		0.04
8.85	110	973.5	0.0199239		0.03
8.84	218	1927.12	0.0394856		0.02
8.83	409	3611.47	0.0740808		0.01
8.82	461	4066.02	0.0834994		0
8.81	411	3620.91	0.074443		-0.01
8.8	871	7664.8	0.157761		-0.02
8.79	439	3858.81	0.0795146		-0.03
8.78	633	5557.74	0.114653		-0.04
8.77	247	2166.19	0.0447383		-0.05
8.76	425	3723	0.0769788		-0.06
8.75	125	1093.75	0.0226408		-0.07
	5521	8.82095
