# Supplementary material for: Interaction Wave Functions and Interaction-Based Coherence and Entanglement in Complex Adaptive Systems
Source: Research Square preprint supplement (doi:10.21203/rs.3.rs-6846233/v1), 2025-06-16
Supplement: Supplementary file 629 [file 30616-20.xls]

## Sheet: Sheet1
0.22					10	10	2.2	0.000107646
0.21					0	0	0	0
0.2				23	0	23	4.6	0.000247586
0.19				1	20	21	3.99	0.000226057
0.18				42	0	42	7.56	0.000452114
0.17				55	66	121	20.57	0.00130252
0.16				119	95	214	34.24	0.00230363
0.15				243	216	459	68.85	0.00494096
0.14				78	131	209	29.26	0.0022498
0.13				115	39	154	20.02	0.00165775
0.12			70	111	169	350	42	0.00376761
0.11	109		254	521	31	915	100.65	0.00984962
0.1	148	512	303	198	380	1541	154.1	0.0165883
0.09	61	427	1187	120	1369	3164	284.76	0.0340592
0.08	18	446	470	65	26	1025	82	0.0110337
0.07	481	255	766	41	314	1857	129.99	0.0199899
0.06	470	974	554	384	633	3015	180.9	0.0324553
0.05	1035	956	1916	670	675	5252	262.6	0.0565357
0.04	739	1377	1431	97	2191	5835	233.4	0.0628115
0.03	967	2085	507	112	1160	4831	144.93	0.0520038
0.02	1662	1795	603	584	1976	6620	132.4	0.0712617
0.01	385	4287	1663	1088	673	8096	80.96	0.0871503
-5.89806e-17	1109	2278	1266	1602	381	6636	-3.91395e-13	0.071434
-0.01	1717	815	1649	877	1762	6820	-68.2	0.0734146
-0.02	1343	1354	891	689	278	4555	-91.1	0.0490328
-0.03	1166	1191	1231	1573	132	5293	-158.79	0.0569771
-0.04	967	776	394	1398	73	3608	-144.32	0.0388387
-0.05	88	613	367	3751	73	4892	-244.6	0.0526605
-0.06	0	423	650	598	4665	6336	-380.16	0.0682046
-0.07	196	750	1150	14	421	2531	-177.17	0.0272452
-0.08	388	961	226	84	548	2207	-176.56	0.0237575
-0.09	108	1328	617		165	2218	-199.62	0.0238759
-0.1	72	388	507		0	967	-96.7	0.0104094
-0.11	34	244	435		686	1399	-153.89	0.0150597
-0.12	58	82	108		0	248	-29.76	0.00266962
-0.13	102		155		87	344	-44.72	0.00370303
-0.14	57		203		37	297	-41.58	0.00319709
-0.15	38		349			387	-58.05	0.0041659
-0.16	5		136			141	-22.56	0.00151781
-0.17	230					230	-39.1	0.00247586
-0.18	34					34	-6.12	0.000365997
						92897	-0.00121662
