# Supplementary material for: Interaction Wave Functions and Interaction-Based Coherence and Entanglement in Complex Adaptive Systems
Source: Research Square preprint supplement (doi:10.21203/rs.3.rs-6846233/v1), 2025-06-16
Supplement: Supplementary file 630 [file 30616.xls]

## Sheet: Sheet1
9.04	109	985.36	0.007906		0.11
9.03	148	1336.44	0.0107348		0.1
9.02	61	550.22	0.00442446		0.09
9.01	18	162.18	0.00130558		0.08
9	481	4329	0.0348879		0.07
8.99	470	4225.3	0.0340901		0.06
8.98	1035	9294.3	0.0750707		0.05
8.97	739	6628.83	0.0536012		0.04
8.96	967	8664.32	0.0701385		0.03
8.95	1662	14874.9	0.120548		0.02
8.94	385	3441.9	0.0279249		0.01
8.93	1109	9903.37	0.0804381		0
8.92	1717	15315.6	0.124538		-0.01
8.91	1343	11966.1	0.0974106		-0.02
8.9	1166	10377.4	0.0845724		-0.03
8.89	967	8596.63	0.0701385		-0.04
8.88	88	781.44	0.00638282		-0.05
8.87	0	0	0		-0.06
8.86	196	1736.56	0.0142163		-0.07
8.85	388	3433.8	0.0281425		-0.08
8.84	108	954.72	0.00783347		-0.09
8.83	72	635.76	0.00522231		-0.1
8.82	34	299.88	0.00246609		-0.11
8.81	58	510.98	0.00420686		-0.12
8.8	102	897.6	0.00739827		-0.13
8.79	57	501.03	0.00413433		-0.14
8.78	38	333.64	0.00275622		-0.15
8.77	5	43.85	0.00036266		-0.16
8.76	230	2014.8	0.0166824		-0.17
8.75	34	297.5	0.00246609		-0.18
	13787	8.92823
