# Supplementary material for: Interaction Wave Functions and Interaction-Based Coherence and Entanglement in Complex Adaptive Systems
Source: Research Square preprint supplement (doi:10.21203/rs.3.rs-6846233/v1), 2025-06-16
Supplement: Supplementary file 631 [file 30617.xls]

## Sheet: Sheet1
9.18	512	4700.16	0.0210552		0.1
9.17	427	3915.59	0.0175597		0.09
9.16	446	4085.36	0.0183411		0.08
9.15	255	2333.25	0.0104865		0.07
9.14	974	8902.36	0.0400543		0.06
9.13	956	8728.28	0.0393141		0.05
9.12	1377	12558.2	0.0566271		0.04
9.11	2085	18994.4	0.0857425		0.03
9.1	1795	16334.5	0.0738167		0.02
9.09	4287	38968.8	0.176296		0.01
9.08	2278	20684.2	0.0936793		0
9.07	815	7392.05	0.0335156		-0.01
9.06	1354	12267.2	0.0556812		-0.02
9.05	1191	10778.6	0.0489781		-0.03
9.04	776	7015.04	0.0319118		-0.04
9.03	613	5535.39	0.0252087		-0.05
9.02	423	3815.46	0.0173952		-0.06
9.01	750	6757.5	0.0308426		-0.07
9	961	8649	0.0395197		-0.08
8.99	1328	11938.7	0.054612		-0.09
8.98	388	3484.24	0.0159559		-0.1
8.97	244	2188.68	0.0100341		-0.11
8.96	82	734.72	0.00337213		-0.12
	24317	9.07849
