# Supplementary material for: Interaction Wave Functions and Interaction-Based Coherence and Entanglement in Complex Adaptive Systems
Source: Research Square preprint supplement (doi:10.21203/rs.3.rs-6846233/v1), 2025-06-16
Supplement: Supplementary file 632 [file 30618.xls]

## Sheet: Sheet1
9.19	70	643.3	0.00348988		0.12
9.18	254	2331.72	0.0126633		0.11
9.17	303	2778.51	0.0151062		0.1
9.16	1187	10872.9	0.0591784		0.09
9.15	470	4300.5	0.023432		0.08
9.14	766	7001.24	0.0381893		0.07
9.13	554	5058.02	0.0276199		0.06
9.12	1916	17473.9	0.095523		0.05
9.11	1431	13036.4	0.0713431		0.04
9.1	507	4613.7	0.0252767		0.03
9.09	603	5481.27	0.0300628		0.02
9.08	1663	15100	0.0829096		0.01
9.07	1266	11482.6	0.063117		0
9.06	1649	14939.9	0.0822116		-0.01
9.05	891	8063.55	0.0444212		-0.02
9.04	1231	11128.2	0.061372		-0.03
9.03	394	3557.82	0.019643		-0.04
9.02	367	3310.34	0.0182969		-0.05
9.01	650	5856.5	0.032406		-0.06
9	1150	10350	0.0573337		-0.07
8.99	226	2031.74	0.0112673		-0.08
8.98	617	5540.66	0.0307608		-0.09
8.97	507	4547.79	0.0252767		-0.1
8.96	435	3897.6	0.0216871		-0.11
8.95	108	966.6	0.00538439		-0.12
8.94	155	1385.7	0.00772759		-0.13
8.93	203	1812.79	0.0101207		-0.14
8.92	349	3113.08	0.0173995		-0.15
8.91	136	1211.76	0.00678034		-0.16
	20058	9.06812
