# Supplementary material for: Interaction Wave Functions and Interaction-Based Coherence and Entanglement in Complex Adaptive Systems
Source: Research Square preprint supplement (doi:10.21203/rs.3.rs-6846233/v1), 2025-06-16
Supplement: Supplementary file 633 [file 30619.xls]

## Sheet: Sheet1
8.95	23	205.85	0.0015079		0.2
8.94	1	8.94	6.55609e-05		0.19
8.93	42	375.06	0.00275356		0.18
8.92	55	490.6	0.00360585		0.17
8.91	119	1060.29	0.00780174		0.16
8.9	243	2162.7	0.0159313		0.15
8.89	78	693.42	0.00511375		0.14
8.88	115	1021.2	0.0075395		0.13
8.87	111	984.57	0.00727726		0.12
8.86	521	4616.06	0.0341572		0.11
8.85	198	1752.3	0.0129811		0.1
8.84	120	1060.8	0.0078673		0.09
8.83	65	573.95	0.00426146		0.08
8.82	41	361.62	0.002688		0.07
8.81	384	3383.04	0.0251754		0.06
8.8	670	5896	0.0439258		0.05
8.79	97	852.63	0.0063594		0.04
8.78	112	983.36	0.00734282		0.03
8.77	584	5121.68	0.0382875		0.02
8.76	1088	9530.88	0.0713302		0.01
8.75	1602	14017.5	0.105029		0
8.74	877	7664.98	0.0574969		-0.01
8.73	689	6014.97	0.0451714		-0.02
8.72	1573	13716.6	0.103127		-0.03
8.71	1398	12176.6	0.0916541		-0.04
8.7	3751	32633.7	0.245919		-0.05
8.69	598	5196.62	0.0392054		-0.06
8.68	14	121.52	0.000917852		-0.07
8.67	84	728.28	0.00550711		-0.08
	15253	8.74619
