# Supplementary material for: Interaction Wave Functions and Interaction-Based Coherence and Entanglement in Complex Adaptive Systems
Source: Research Square preprint supplement (doi:10.21203/rs.3.rs-6846233/v1), 2025-06-16
Supplement: Supplementary file 634 [file 30620.xls]

## Sheet: Sheet1
8.78	10	87.8	0.000513294		0.22
8.77	0	0	0		0.21
8.76	0	0	0		0.2
8.75	20	175	0.00102659		0.19
8.74	0	0	0		0.18
8.73	66	576.18	0.00338774		0.17
8.72	95	828.4	0.0048763		0.16
8.71	216	1881.36	0.0110872		0.15
8.7	131	1139.7	0.00672416		0.14
8.69	39	338.91	0.00200185		0.13
8.68	169	1466.92	0.00867467		0.12
8.67	31	268.77	0.00159121		0.11
8.66	380	3290.8	0.0195052		0.1
8.65	1369	11841.9	0.07027		0.09
8.64	26	224.64	0.00133457		0.08
8.63	314	2709.82	0.0161174		0.07
8.62	633	5456.46	0.0324915		0.06
8.61	675	5811.75	0.0346474		0.05
8.6	2191	18842.6	0.112463		0.04
8.59	1160	9964.4	0.0595421		0.03
8.58	1976	16954.1	0.101427		0.02
8.57	673	5767.61	0.0345447		0.01
8.56	381	3261.36	0.0195565		0
8.55	1762	15065.1	0.0904425		-0.01
8.54	278	2374.12	0.0142696		-0.02
8.53	132	1125.96	0.00677549		-0.03
8.52	73	621.96	0.00374705		-0.04
8.51	73	621.23	0.00374705		-0.05
8.5	4665	39652.5	0.239452		-0.06
8.49	421	3574.29	0.0216097		-0.07
8.48	548	4647.04	0.0281285		-0.08
8.47	165	1397.55	0.00846936		-0.09
8.46	0	0	0		-0.1
8.45	686	5796.7	0.035212		-0.11
8.44	0	0	0		-0.12
8.43	87	733.41	0.00446566		-0.13
8.42	37	311.54	0.00189919		-0.14
	19482	8.56225
