# Supplementary material for: Interaction Wave Functions and Interaction-Based Coherence and Entanglement in Complex Adaptive Systems
Source: Research Square preprint supplement (doi:10.21203/rs.3.rs-6846233/v1), 2025-06-16
Supplement: Supplementary file 635 [file 30623-27.xls]

## Sheet: Sheet1
0.27					73	73	19.71	0.00146225
0.26					0	0	0	0
0.25				205	0	205	51.25	0.00410632
0.24				105	32	137	32.88	0.00274423
0.23				439	0	439	100.97	0.00879354
0.22				188	34	222	48.84	0.00444685
0.21				179	5	184	38.64	0.00368568
0.2				182	27	209	41.8	0.00418645
0.19				109	0	109	20.71	0.00218336
0.18				91	6	97	17.46	0.00194299
0.17				212	0	212	36.04	0.00424654
0.16				244	305	549	87.84	0.0109969
0.15				1052	118	1170	175.5	0.0234361
0.14				269	87	356	49.84	0.00713098
0.13				461	136	597	77.61	0.0119584
0.12		137		227	64	428	51.36	0.0085732
0.11		28	140	710	121	999	109.89	0.0200108
0.1	215	5	151	1087	361	1819	181.9	0.0364361
0.09	62	0	158	743	161	1124	101.16	0.0225147
0.08	9	8	61	993	1006	2077	166.16	0.0416041
0.07	112	247	58	506	712	1635	114.45	0.0327504
0.06	68	56	621	335	404	1484	89.04	0.0297258
0.05	315	212	494	445	561	2027	101.35	0.0406025
0.04	157	167	630	55	497	1506	60.24	0.0301665
0.03	737	391	195	145	450	1918	57.54	0.0384192
0.02	726	591	647	321	86	2371	47.42	0.0474931
0.01	542	440	455	120	257	1814	18.14	0.036336
-8.67362e-17	2496	528	648	349	262	4283	-3.71491e-13	0.0857921
-0.01	813	345	258	372	50	1838	-18.38	0.0368167
-0.02	1897	244	204	92	420	2857	-57.14	0.0572281
-0.03	1028	676	291	377	100	2472	-74.16	0.0495163
-0.04	504	195	601	201	188	1689	-67.56	0.0338321
-0.05	273	374	330	373	92	1442	-72.1	0.0288845
-0.06		132	197	311	84	724	-43.44	0.0145023
-0.07		80	0	380	326	786	-55.02	0.0157442
-0.08		120	198	298	256	872	-69.76	0.0174669
-0.09		0	85	390	264	739	-66.51	0.0148028
-0.1		0	36	737	141	914	-91.4	0.0183082
-0.11		250	9	538	270	1067	-117.37	0.0213729
-0.12			164	268	544	976	-117.12	0.0195501
-0.13			4	286	339	629	-81.77	0.0125994
-0.14			0	288	230	518	-72.52	0.010376
-0.15			0	458	50	508	-76.2	0.0101757
-0.16			120	264	82	466	-74.56	0.00933437
-0.17				420	0	420	-71.4	0.00841296
-0.18				144	5	149	-26.82	0.0029846
-0.19				335	0	335	-63.65	0.00671033
-0.2				862	0	862	-172.4	0.0172666
-0.21				45	0	45	-9.45	0.000901388
-0.22				69	383	452	-99.44	0.00905394
-0.23				397		397	-91.31	0.00795225
-0.24				133		133	-31.92	0.0026641
-0.25				175		175	-43.75	0.0035054
-0.26				0		0	0	0
-0.27				0		0	0	0
-0.28				13		13	-3.64	0.000260401
-0.29				179		179	-51.91	0.00358552
-0.3				82		82	-24.6	0.00164253
-0.31				140		140	-43.4	0.00280432
						49923	0.000181079
