# Supplementary material for: Interaction Wave Functions and Interaction-Based Coherence and Entanglement in Complex Adaptive Systems
Source: Research Square preprint supplement (doi:10.21203/rs.3.rs-6846233/v1), 2025-06-16
Supplement: Supplementary file 636 [file 30623.xls]

## Sheet: Sheet1
8.5	215	1827.5	0.0215994		0.1
8.49	62	526.38	0.00622865		0.09
8.48	9	76.32	0.000904159		0.08
8.47	112	948.64	0.0112518		0.07
8.46	68	575.28	0.00683142		0.06
8.45	315	2661.75	0.0316456		0.05
8.44	157	1325.08	0.0157726		0.04
8.43	737	6212.91	0.0740406		0.03
8.42	726	6112.92	0.0729355		0.02
8.41	542	4558.22	0.0544505		0.01
8.4	2496	20966.4	0.250753		0
8.39	813	6821.07	0.0816757		-0.01
8.38	1897	15896.9	0.190577		-0.02
8.37	1028	8604.36	0.103275		-0.03
8.36	504	4213.44	0.0506329		-0.04
8.35	273	2279.55	0.0274262		-0.05
	9954	8.3993
