# Supplementary material for: Interaction Wave Functions and Interaction-Based Coherence and Entanglement in Complex Adaptive Systems
Source: Research Square preprint supplement (doi:10.21203/rs.3.rs-6846233/v1), 2025-06-16
Supplement: Supplementary file 637 [file 30624.xls]

## Sheet: Sheet1
8.45	137	1157.65	0.0262151		0.12
8.44	28	236.32	0.00535783		0.11
8.43	5	42.15	0.000956755		0.1
8.42	0	0	0		0.09
8.41	8	67.28	0.00153081		0.08
8.4	247	2074.8	0.0472637		0.07
8.39	56	469.84	0.0107157		0.06
8.38	212	1776.56	0.0405664		0.05
8.37	167	1397.79	0.0319556		0.04
8.36	391	3268.76	0.0748182		0.03
8.35	591	4934.85	0.113088		0.02
8.34	440	3669.6	0.0841944		0.01
8.33	528	4398.24	0.101033		0
8.32	345	2870.4	0.0660161		-0.01
8.31	244	2027.64	0.0466896		-0.02
8.3	676	5610.8	0.129353		-0.03
8.29	195	1616.55	0.0373134		-0.04
8.28	374	3096.72	0.0715653		-0.05
8.27	132	1091.64	0.0252583		-0.06
8.26	80	660.8	0.0153081		-0.07
8.25	120	990	0.0229621		-0.08
8.24	0	0	0		-0.09
8.23	0	0	0		-0.1
8.22	250	2055	0.0478377		-0.11
	5226	8.32633
