# Supplementary material for: Interaction Wave Functions and Interaction-Based Coherence and Entanglement in Complex Adaptive Systems
Source: Research Square preprint supplement (doi:10.21203/rs.3.rs-6846233/v1), 2025-06-16
Supplement: Supplementary file 638 [file 30625.xls]

## Sheet: Sheet1
8.55	140	1197	0.0207254		0.11
8.54	151	1289.54	0.0223538		0.1
8.53	158	1347.74	0.0233901		0.09
8.52	61	519.72	0.00903035		0.08
8.51	58	493.58	0.00858623		0.07
8.5	621	5278.5	0.0919319		0.06
8.49	494	4194.06	0.073131		0.05
8.48	630	5342.4	0.0932642		0.04
8.47	195	1651.65	0.0288675		0.03
8.46	647	5473.62	0.0957809		0.02
8.45	455	3844.75	0.0673575		0.01
8.44	648	5469.12	0.0959289		0
8.43	258	2174.94	0.0381939		-0.01
8.42	204	1717.68	0.0301999		-0.02
8.41	291	2447.31	0.0430792		-0.03
8.4	601	5048.4	0.0889711		-0.04
8.39	330	2768.7	0.0488527		-0.05
8.38	197	1650.86	0.0291636		-0.06
8.37	0	0	0		-0.07
8.36	198	1655.28	0.0293116		-0.08
8.35	85	709.75	0.0125833		-0.09
8.34	36	300.24	0.00532939		-0.1
8.33	9	74.97	0.00133235		-0.11
8.32	164	1364.48	0.0242783		-0.12
8.31	4	33.24	0.000592154		-0.13
8.3	0	0	0		-0.14
8.29	0	0	0		-0.15
8.28	120	993.6	0.0177646		-0.16
	6755	8.44428
