# Supplementary material for: Interaction Wave Functions and Interaction-Based Coherence and Entanglement in Complex Adaptive Systems
Source: Research Square preprint supplement (doi:10.21203/rs.3.rs-6846233/v1), 2025-06-16
Supplement: Supplementary file 639 [file 30626.xls]

## Sheet: Sheet1
8.9	205	1824.5	0.0111419		0.25
8.89	105	933.45	0.00570683		0.24
8.88	439	3898.32	0.02386		0.23
8.87	188	1667.56	0.0102179		0.22
8.86	179	1585.94	0.00972879		0.21
8.85	182	1610.7	0.00989184		0.2
8.84	109	963.56	0.00592424		0.19
8.83	91	803.53	0.00494592		0.18
8.82	212	1869.84	0.0115224		0.17
8.81	244	2149.64	0.0132616		0.16
8.8	1052	9257.6	0.057177		0.15
8.79	269	2364.51	0.0146204		0.14
8.78	461	4047.58	0.0250557		0.13
8.77	227	1990.79	0.0123376		0.12
8.76	710	6219.6	0.0385891		0.11
8.75	1087	9511.25	0.0590793		0.1
8.74	743	6493.82	0.0403826		0.09
8.73	993	8668.89	0.0539703		0.08
8.72	506	4412.32	0.0275015		0.07
8.71	335	2917.85	0.0182075		0.06
8.7	445	3871.5	0.0241861		0.05
8.69	55	477.95	0.00298929		0.04
8.68	145	1258.6	0.00788086		0.03
8.67	321	2783.07	0.0174466		0.02
8.66	120	1039.2	0.00652209		0.01
8.65	349	3018.85	0.0189684		0
8.64	372	3214.08	0.0202185		-0.01
8.63	92	793.96	0.00500027		-0.02
8.62	377	3249.74	0.0204902		-0.03
8.61	201	1730.61	0.0109245		-0.04
8.6	373	3207.8	0.0202728		-0.05
8.59	311	2671.49	0.0169031		-0.06
8.58	380	3260.4	0.0206533		-0.07
8.57	298	2553.86	0.0161965		-0.08
8.56	390	3338.4	0.0211968		-0.09
8.55	737	6301.35	0.0400565		-0.1
8.54	538	4594.52	0.0292407		-0.11
8.53	268	2286.04	0.014566		-0.12
8.52	286	2436.72	0.0155443		-0.13
8.51	288	2450.88	0.015653		-0.14
8.5	458	3893	0.0248927		-0.15
8.49	264	2241.36	0.0143486		-0.16
8.48	420	3561.6	0.0228273		-0.17
8.47	144	1219.68	0.00782651		-0.18
8.46	335	2834.1	0.0182075		-0.19
8.45	862	7283.9	0.0468504		-0.2
8.44	45	379.8	0.00244579		-0.21
8.43	69	581.67	0.0037502		-0.22
8.42	397	3342.74	0.0215773		-0.23
8.41	133	1118.53	0.00722865		-0.24
8.4	175	1470	0.00951139		-0.25
8.39	0	0	0		-0.26
8.38	0	0	0		-0.27
8.37	13	108.81	0.00070656		-0.28
8.36	179	1496.44	0.00972879		-0.29
8.35	82	684.7	0.00445676		-0.3
8.34	140	1167.6	0.00760911		-0.31
	18399	8.64798
