# Supplementary material for: Interaction Wave Functions and Interaction-Based Coherence and Entanglement in Complex Adaptive Systems
Source: Research Square preprint supplement (doi:10.21203/rs.3.rs-6846233/v1), 2025-06-16
Supplement: Supplementary file 640 [file 30627.xls]

## Sheet: Sheet1
8.79	73	641.67	0.00761289		0.27
8.78	0	0	0		0.26
8.77	0	0	0		0.25
8.76	32	280.32	0.00333716		0.24
8.75	0	0	0		0.23
8.74	34	297.16	0.00354573		0.22
8.73	5	43.65	0.000521431		0.21
8.72	27	235.44	0.00281573		0.2
8.71	0	0	0		0.19
8.7	6	52.2	0.000625717		0.18
8.69	0	0	0		0.17
8.68	305	2647.4	0.0318073		0.16
8.67	118	1023.06	0.0123058		0.15
8.66	87	753.42	0.0090729		0.14
8.65	136	1176.4	0.0141829		0.13
8.64	64	552.96	0.00667431		0.12
8.63	121	1044.23	0.0126186		0.11
8.62	361	3111.82	0.0376473		0.1
8.61	161	1386.21	0.0167901		0.09
8.6	1006	8651.6	0.104912		0.08
8.59	712	6116.08	0.0742517		0.07
8.58	404	3466.32	0.0421316		0.06
8.57	561	4807.77	0.0585045		0.05
8.56	497	4254.32	0.0518302		0.04
8.55	450	3847.5	0.0469288		0.03
8.54	86	734.44	0.00896861		0.02
8.53	257	2192.21	0.0268015		0.01
8.52	262	2232.24	0.027323		0
8.51	50	425.5	0.00521431		-0.01
8.5	420	3570	0.0438002		-0.02
8.49	100	849	0.0104286		-0.03
8.48	188	1594.24	0.0196058		-0.04
8.47	92	779.24	0.00959433		-0.05
8.46	84	710.64	0.00876004		-0.06
8.45	326	2754.7	0.0339973		-0.07
8.44	256	2160.64	0.0266973		-0.08
8.43	264	2225.52	0.0275315		-0.09
8.42	141	1187.22	0.0147043		-0.1
8.41	270	2270.7	0.0281573		-0.11
8.4	544	4569.6	0.0567317		-0.12
8.39	339	2844.21	0.035353		-0.13
8.38	230	1927.4	0.0239858		-0.14
8.37	50	418.5	0.00521431		-0.15
8.36	82	685.52	0.00855147		-0.16
8.35	0	0	0		-0.17
8.34	5	41.7	0.000521431		-0.18
8.33	0	0	0		-0.19
8.32	0	0	0		-0.2
8.31	0	0	0		-0.21
8.3	383	3178.9	0.0399416		-0.22
	9589	8.52452
