# Supplementary material for: Interaction Wave Functions and Interaction-Based Coherence and Entanglement in Complex Adaptive Systems
Source: Research Square preprint supplement (doi:10.21203/rs.3.rs-6846233/v1), 2025-06-16
Supplement: Supplementary file 641 [file 30630.xls]

## Sheet: Sheet1
8.58	89	763.62	0.0196903
8.57	52	445.64	0.0115044
8.56	93	796.08	0.0205752
8.55	86	735.3	0.0190265
8.54	25	213.5	0.00553097
8.53	11	93.83	0.00243363
8.52	40	340.8	0.00884956
8.51	104	885.04	0.0230088
8.5	203	1725.5	0.0449115
8.49	159	1349.91	0.035177
8.48	140	1187.2	0.0309735
8.47	307	2600.29	0.0679204
8.46	72	609.12	0.0159292
8.45	581	4909.45	0.12854
8.44	304	2565.76	0.0672566
8.43	159	1340.37	0.035177
8.42	74	623.08	0.0163717
8.41	106	891.46	0.0234513
8.4	282	2368.8	0.0623894
8.39	381	3196.59	0.084292
8.38	208	1743.04	0.0460177
8.37	539	4511.43	0.119248
8.36	308	2574.88	0.0681416
8.35	102	851.7	0.0225664
8.34	0	0	0
8.33	19	158.27	0.00420354
8.32	0	0	0
8.31	5	41.55	0.00110619
8.3	71	589.3	0.015708
	4520	8.43175
