# Supplementary material for: Interaction Wave Functions and Interaction-Based Coherence and Entanglement in Complex Adaptive Systems
Source: Research Square preprint supplement (doi:10.21203/rs.3.rs-6846233/v1), 2025-06-16
Supplement: Supplementary file 642 [file 30602-06.xls]

## Sheet: Sheet1
0.31			11			11	3.41	0.000732211
0.3			0			0	0	0
0.29			0			0	0	0
0.28			0			0	0	0
0.27			10			10	2.7	0.000665646
0.26			0			0	0	0
0.25			0			0	0	0
0.24			0			0	0	0
0.23			0			0	0	0
0.22			13			13	2.86	0.00086534
0.21			43			43	9.03	0.00286228
0.2			0	77		77	15.4	0.00512547
0.19			33	0		33	6.27	0.00219663
0.18		41	0	0		41	7.38	0.00272915
0.17		66	2	13		81	13.77	0.00539173
0.16		7	0	0		7	1.12	0.000465952
0.15	1	24	0	0		25	3.75	0.00166412
0.14	0	13	0	0		13	1.82	0.00086534
0.13	0	252	0	0		252	32.76	0.0167743
0.12	0	0	0	8		8	0.96	0.000532517
0.11	0	0	1298	0		1298	142.78	0.0864009
0.1	7	0	152	174		333	33.3	0.022166
0.09	0	0	163	0		163	14.67	0.01085
0.08	49	9	0	10		68	5.44	0.00452639
0.07	537	1	0	27	118	683	47.81	0.0454636
0.06	24	55	0	0	10	89	5.34	0.00592425
0.05	170	42	13	41	33	299	14.95	0.0199028
0.04	20	0	175	4	39	238	9.52	0.0158424
0.03	0	100	0	39	44	183	5.49	0.0121813
0.02	132	0	51	61	974	1218	24.36	0.0810757
0.01	67	0	214	123	32	436	4.36	0.0290222
-1.42247e-16	32	108	70	1001	674	1885	-2.68136e-13	0.125474
-0.01	339	53	30	130	104	656	-6.56	0.0436664
-0.02	318	382	2	1087	128	1917	-38.34	0.127604
-0.03	773	7	1	268	103	1152	-34.56	0.0766824
-0.04	227	50	28	63	61	429	-17.16	0.0285562
-0.05	85	97	72	23	44	321	-16.05	0.0213672
-0.06		300	188	0	0	488	-29.28	0.0324835
-0.07		120	58	5	169	352	-24.64	0.0234307
-0.08		308	16		39	363	-29.04	0.024163
-0.09		138	1369		0	1507	-135.63	0.100313
-0.1			0		9	9	-0.9	0.000599081
-0.11			40		2	42	-4.62	0.00279571
-0.12			82			82	-9.84	0.0054583
-0.13			35			35	-4.55	0.00232976
-0.14			0			0	0	0
-0.15			0			0	0	0
-0.16			0			0	0	0
-0.17			5			5	-0.85	0.000332823
-0.18			158			158	-28.44	0.0105172
						15023	0.00191639
