# Supplementary material for: Interaction Wave Functions and Interaction-Based Coherence and Entanglement in Complex Adaptive Systems
Source: Research Square preprint supplement (doi:10.21203/rs.3.rs-6846233/v1), 2025-06-16
Supplement: Supplementary file 643 [file 30602.xls]

## Sheet: Sheet1
21.68	1	21.68	0.000359583		0.15
21.67	0	0	0		0.14
21.66	0	0	0		0.13
21.65	0	0	0		0.12
21.64	0	0	0		0.11
21.63	7	151.41	0.00251708		0.1
21.62	0	0	0		0.09
21.61	49	1058.89	0.0176196		0.08
21.6	537	11599.2	0.193096		0.07
21.59	24	518.16	0.00862999		0.06
21.58	170	3668.6	0.0611291		0.05
21.57	20	431.4	0.00719166		0.04
21.56	0	0	0		0.03
21.55	132	2844.6	0.0474649		0.02
21.54	67	1443.18	0.0240921		0.01
21.53	32	688.96	0.0115067		0
21.52	339	7295.28	0.121899		-0.01
21.51	318	6840.18	0.114347		-0.02
21.5	773	16619.5	0.277958		-0.03
21.49	227	4878.23	0.0816253		-0.04
21.48	85	1825.8	0.0305645		-0.05
	2781	21.5336
