# Supplementary material for: Interaction Wave Functions and Interaction-Based Coherence and Entanglement in Complex Adaptive Systems
Source: Research Square preprint supplement (doi:10.21203/rs.3.rs-6846233/v1), 2025-06-16
Supplement: Supplementary file 644 [file 30603.xls]

## Sheet: Sheet1
21.7	41	889.7	0.0188679		0.18
21.69	66	1431.54	0.0303728		0.17
21.68	7	151.76	0.00322135		0.16
21.67	24	520.08	0.0110446		0.15
21.66	13	281.58	0.00598251		0.14
21.65	252	5455.8	0.115969		0.13
21.64	0	0	0		0.12
21.63	0	0	0		0.11
21.62	0	0	0		0.1
21.61	0	0	0		0.09
21.6	9	194.4	0.00414174		0.08
21.59	1	21.59	0.000460193		0.07
21.58	55	1186.9	0.0253106		0.06
21.57	42	905.94	0.0193281		0.05
21.56	0	0	0		0.04
21.55	100	2155	0.0460193		0.03
21.54	0	0	0		0.02
21.53	0	0	0		0.01
21.52	108	2324.16	0.0497009		-2.84217e-14
21.51	53	1140.03	0.0243902		-0.01
21.5	382	8213	0.175794		-0.02
21.49	7	150.43	0.00322135		-0.03
21.48	50	1074	0.0230097		-0.04
21.47	97	2082.59	0.0446387		-0.05
21.46	300	6438	0.138058		-0.06
21.45	120	2574	0.0552232		-0.07
21.44	308	6603.52	0.14174		-0.08
21.43	138	2957.34	0.0635067		-0.09
	2173	21.5147
