# Supplementary material for: Interaction Wave Functions and Interaction-Based Coherence and Entanglement in Complex Adaptive Systems
Source: Research Square preprint supplement (doi:10.21203/rs.3.rs-6846233/v1), 2025-06-16
Supplement: Supplementary file 645 [file 30604.xls]

## Sheet: Sheet1
21.5	11	236.5	0.00253924		0.31
21.49	0	0	0		0.3
21.48	0	0	0		0.29
21.47	0	0	0		0.28
21.46	10	214.6	0.0023084		0.27
21.45	0	0	0		0.26
21.44	0	0	0		0.25
21.43	0	0	0		0.24
21.42	0	0	0		0.23
21.41	13	278.33	0.00300092		0.22
21.4	43	920.2	0.00992613		0.21
21.39	0	0	0		0.2
21.38	33	705.54	0.00761773		0.19
21.37	0	0	0		0.18
21.36	2	42.72	0.000461681		0.17
21.35	0	0	0		0.16
21.34	0	0	0		0.15
21.33	0	0	0		0.14
21.32	0	0	0		0.13
21.31	0	0	0		0.12
21.3	1298	27647.4	0.299631		0.11
21.29	152	3236.08	0.0350877		0.1
21.28	163	3468.64	0.037627		0.09
21.27	0	0	0		0.08
21.26	0	0	0		0.07
21.25	0	0	0		0.06
21.24	13	276.12	0.00300092		0.05
21.23	175	3715.25	0.040397		0.04
21.22	0	0	0		0.03
21.21	51	1081.71	0.0117729		0.02
21.2	214	4536.8	0.0493998		0.01
21.19	70	1483.3	0.0161588		-4.9738e-14
21.18	30	635.4	0.00692521		-0.01
21.17	2	42.34	0.000461681		-0.02
21.16	1	21.16	0.00023084		-0.03
21.15	28	592.2	0.00646353		-0.04
21.14	72	1522.08	0.0166205		-0.05
21.13	188	3972.44	0.043398		-0.06
21.12	58	1224.96	0.0133887		-0.07
21.11	16	337.76	0.00369344		-0.08
21.1	1369	28885.9	0.31602		-0.09
21.09	0	0	0		-0.1
21.08	40	843.2	0.00923361		-0.11
21.07	82	1727.74	0.0189289		-0.12
21.06	35	737.1	0.00807941		-0.13
21.05	0	0	0		-0.14
21.04	0	0	0		-0.15
21.03	0	0	0		-0.16
21.02	5	105.1	0.0011542		-0.17
21.01	158	3319.58	0.0364728		-0.18
	4332	21.1935
