# Supplementary material for: Interaction Wave Functions and Interaction-Based Coherence and Entanglement in Complex Adaptive Systems
Source: Research Square preprint supplement (doi:10.21203/rs.3.rs-6846233/v1), 2025-06-16
Supplement: Supplementary file 646 [file 30605.xls]

## Sheet: Sheet1
21.1	77	1624.7	0.0244134		0.2
21.09	0	0	0		0.19
21.08	0	0	0		0.18
21.07	13	273.91	0.00412175		0.17
21.06	0	0	0		0.16
21.05	0	0	0		0.15
21.04	0	0	0		0.14
21.03	0	0	0		0.13
21.02	8	168.16	0.00253646		0.12
21.01	0	0	0		0.11
21	174	3654	0.055168		0.1
20.99	0	0	0		0.09
20.98	10	209.8	0.00317058		0.08
20.97	27	566.19	0.00856056		0.07
20.96	0	0	0		0.06
20.95	41	858.95	0.0129994		0.05
20.94	4	83.76	0.00126823		0.04
20.93	39	816.27	0.0123653		0.03
20.92	61	1276.12	0.0193405		0.02
20.91	123	2571.93	0.0389981		0.01
20.9	1001	20920.9	0.317375		-2.84217e-14
20.89	130	2715.7	0.0412175		-0.01
20.88	1087	22696.6	0.344642		-0.02
20.87	268	5593.16	0.0849715		-0.03
20.86	63	1314.18	0.0199746		-0.04
20.85	23	479.55	0.00729233		-0.05
20.84	0	0	0		-0.06
20.83	5	104.15	0.00158529		-0.07
	3154	20.903
