# Supplementary material for: Interaction Wave Functions and Interaction-Based Coherence and Entanglement in Complex Adaptive Systems
Source: Research Square preprint supplement (doi:10.21203/rs.3.rs-6846233/v1), 2025-06-16
Supplement: Supplementary file 647 [file 30606.xls]

## Sheet: Sheet1
20.8	118	2454.4	0.0456833		0.07
20.79	10	207.9	0.00387147		0.06
20.78	33	685.74	0.0127758		0.05
20.77	39	810.03	0.0150987		0.04
20.76	44	913.44	0.0170345		0.03
20.75	974	20210.5	0.377081		0.02
20.74	32	663.68	0.0123887		0.01
20.73	674	13972	0.260937		0
20.72	104	2154.88	0.0402633		-0.01
20.71	128	2650.88	0.0495548		-0.02
20.7	103	2132.1	0.0398761		-0.03
20.69	61	1262.09	0.023616		-0.04
20.68	44	909.92	0.0170345		-0.05
20.67	0	0	0		-0.06
20.66	169	3491.54	0.0654278		-0.07
20.65	39	805.35	0.0150987		-0.08
20.64	0	0	0		-0.09
20.63	9	185.67	0.00348432		-0.1
20.62	2	41.24	0.000774293		-0.11
	2583	20.7322
