# Supplementary material for: Interaction Wave Functions and Interaction-Based Coherence and Entanglement in Complex Adaptive Systems
Source: Research Square preprint supplement (doi:10.21203/rs.3.rs-6846233/v1), 2025-06-16
Supplement: Supplementary file 648 [file 30609-13.xls]

## Sheet: Sheet1
0.25				3		3	0.75	0.000176554
0.24				0		0	0	0
0.23				0		0	0	0
0.22		5		0		5	1.1	0.000294256
0.21		0		0		0	0	0
0.2	123	0		10		133	26.6	0.00782721
0.19	122	0		0		122	23.18	0.00717985
0.18	52	0		0		52	9.36	0.00306026
0.17	0	0		0		0	0	0
0.16	31	0	170	0		201	32.16	0.0118291
0.15	0	0	0	0		0	0	0
0.14	0	0	0	0		0	0	0
0.13	0	116	0	0		116	15.08	0.00682674
0.12	105	0	0	0		105	12.6	0.00617938
0.11	114	2	0	99		215	23.65	0.012653
0.1	2	0	0	10		12	1.2	0.000706215
0.09	41	5	0	0	230	276	24.84	0.0162429
0.08	923	16	298	0	43	1280	102.4	0.0753296
0.07	0	0	25	2	90	117	8.19	0.00688559
0.06	1	0	28	12	6	47	2.82	0.00276601
0.05	2	0	0	0	3	5	0.25	0.000294256
0.04	1	0	9	0	119	129	5.16	0.00759181
0.03	491	1034	104	0	0	1629	48.87	0.0958686
0.02	0	6	48	247	285	586	11.72	0.0344868
0.01	167	20	0	2057	78	2322	23.22	0.136653
-8.67362e-17	10	2	55	9	157	233	-2.02095e-14	0.0137123
-0.01	300	167	45	478	332	1322	-13.22	0.0778013
-0.02	989	243	2634	84	31	3981	-79.62	0.234287
-0.03	15	21	92	10	148	286	-8.58	0.0168315
-0.04	117	60	387	11	74	649	-25.96	0.0381944
-0.05	125	10	0	0	58	193	-9.65	0.0113583
-0.06	129	0	0	0	47	176	-10.56	0.0103578
-0.07	666	526	4	11	49	1256	-87.92	0.0739171
-0.08	24	0	0	363	0	387	-30.96	0.0227754
-0.09	0	0	0	21	3	24	-2.16	0.00141243
-0.1	0	0	0		0	0	0	0
-0.11	10	33	0		186	229	-25.19	0.0134769
-0.12	821	0	3		13	837	-100.44	0.0492585
-0.13		0			0	0	0	0
-0.14		50			14	64	-8.96	0.00376648
						16992	-0.00176966
