# Supplementary material for: Interaction Wave Functions and Interaction-Based Coherence and Entanglement in Complex Adaptive Systems
Source: Research Square preprint supplement (doi:10.21203/rs.3.rs-6846233/v1), 2025-06-16
Supplement: Supplementary file 649 [file 30609.xls]

## Sheet: Sheet1
20.72	123	2548.56	0.0228582		0.2
20.71	122	2526.62	0.0226724		0.19
20.7	52	1076.4	0.00966363		0.18
20.69	0	0	0		0.17
20.68	31	641.08	0.00576101		0.16
20.67	0	0	0		0.15
20.66	0	0	0		0.14
20.65	0	0	0		0.13
20.64	105	2167.2	0.0195131		0.12
20.63	114	2351.82	0.0211857		0.11
20.62	2	41.24	0.000371678		0.1
20.61	41	845.01	0.0076194		0.09
20.6	923	19013.8	0.171529		0.08
20.59	0	0	0		0.07
20.58	1	20.58	0.000185839		0.06
20.57	2	41.14	0.000371678		0.05
20.56	1	20.56	0.000185839		0.04
20.55	491	10090	0.091247		0.03
20.54	0	0	0		0.02
20.53	167	3428.51	0.0310351		0.01
20.52	10	205.2	0.00185839		-3.19744e-14
20.51	300	6153	0.0557517		-0.01
20.5	989	20274.5	0.183795		-0.02
20.49	15	307.35	0.00278759		-0.03
20.48	117	2396.16	0.0217432		-0.04
20.47	125	2558.75	0.0232299		-0.05
20.46	129	2639.34	0.0239732		-0.06
20.45	666	13619.7	0.123769		-0.07
20.44	24	490.56	0.00446014		-0.08
20.43	0	0	0		-0.09
20.42	0	0	0		-0.1
20.41	10	204.1	0.00185839		-0.11
20.4	821	16748.4	0.152574		-0.12
	5381	20.5184
