# Supplementary material for: Interaction Wave Functions and Interaction-Based Coherence and Entanglement in Complex Adaptive Systems
Source: Research Square preprint supplement (doi:10.21203/rs.3.rs-6846233/v1), 2025-06-16
Supplement: Supplementary file 650 [file 30610.xls]

## Sheet: Sheet1
20.69	5	103.45	0.00215889		0.22
20.68	0	0	0		0.21
20.67	0	0	0		0.2
20.66	0	0	0		0.19
20.65	0	0	0		0.18
20.64	0	0	0		0.17
20.63	0	0	0		0.16
20.62	0	0	0		0.15
20.61	0	0	0		0.14
20.6	116	2389.6	0.0500864		0.13
20.59	0	0	0		0.12
20.58	2	41.16	0.000863558		0.11
20.57	0	0	0		0.1
20.56	5	102.8	0.00215889		0.09
20.55	16	328.8	0.00690846		0.08
20.54	0	0	0		0.07
20.53	0	0	0		0.06
20.52	0	0	0		0.05
20.51	0	0	0		0.04
20.5	1034	21197	0.446459		0.03
20.49	6	122.94	0.00259067		0.02
20.48	20	409.6	0.00863558		0.01
20.47	2	40.94	0.000863558		-3.19744e-14
20.46	167	3416.82	0.0721071		-0.01
20.45	243	4969.35	0.104922		-0.02
20.44	21	429.24	0.00906736		-0.03
20.43	60	1225.8	0.0259067		-0.04
20.42	10	204.2	0.00431779		-0.05
20.41	0	0	0		-0.06
20.4	526	10730.4	0.227116		-0.07
20.39	0	0	0		-0.08
20.38	0	0	0		-0.09
20.37	0	0	0		-0.1
20.36	33	671.88	0.0142487		-0.11
20.35	0	0	0		-0.12
20.34	0	0	0		-0.13
20.33	50	1016.5	0.0215889		-0.14
	2316	20.4665
