# Supplementary material for: Interaction Wave Functions and Interaction-Based Coherence and Entanglement in Complex Adaptive Systems
Source: Research Square preprint supplement (doi:10.21203/rs.3.rs-6846233/v1), 2025-06-16
Supplement: Supplementary file 651 [file 30611.xls]

## Sheet: Sheet1
20.78	170	3532.6	0.0435674		0.16
20.77	0	0	0		0.15
20.76	0	0	0		0.14
20.75	0	0	0		0.13
20.74	0	0	0		0.12
20.73	0	0	0		0.11
20.72	0	0	0		0.1
20.71	0	0	0		0.09
20.7	298	6168.6	0.0763711		0.08
20.69	25	517.25	0.00640697		0.07
20.68	28	579.04	0.00717581		0.06
20.67	0	0	0		0.05
20.66	9	185.94	0.00230651		0.04
20.65	104	2147.6	0.026653		0.03
20.64	48	990.72	0.0123014		0.02
20.63	0	0	0		0.01
20.62	55	1134.1	0.0140953		0
20.61	45	927.45	0.0115325		-0.01
20.6	2634	54260.4	0.675038		-0.02
20.59	92	1894.28	0.0235777		-0.03
20.58	387	7964.46	0.0991799		-0.04
20.57	0	0	0		-0.05
20.56	0	0	0		-0.06
20.55	4	82.2	0.00102512		-0.07
20.54	0	0	0		-0.08
20.53	0	0	0		-0.09
20.52	0	0	0		-0.1
20.51	0	0	0		-0.11
20.5	3	61.5	0.000768836		-0.12
	3902	20.6166
