# Supplementary material for: Interaction Wave Functions and Interaction-Based Coherence and Entanglement in Complex Adaptive Systems
Source: Research Square preprint supplement (doi:10.21203/rs.3.rs-6846233/v1), 2025-06-16
Supplement: Supplementary file 652 [file 30612.xls]

## Sheet: Sheet1
20.84	3	62.52	0.000875401		0.25
20.83	0	0	0		0.24
20.82	0	0	0		0.23
20.81	0	0	0		0.22
20.8	0	0	0		0.21
20.79	10	207.9	0.002918		0.2
20.78	0	0	0		0.19
20.77	0	0	0		0.18
20.76	0	0	0		0.17
20.75	0	0	0		0.16
20.74	0	0	0		0.15
20.73	0	0	0		0.14
20.72	0	0	0		0.13
20.71	0	0	0		0.12
20.7	99	2049.3	0.0288882		0.11
20.69	10	206.9	0.002918		0.1
20.68	0	0	0		0.09
20.67	0	0	0		0.08
20.66	2	41.32	0.000583601		0.07
20.65	12	247.8	0.0035016		0.06
20.64	0	0	0		0.05
20.63	0	0	0		0.04
20.62	0	0	0		0.03
20.61	247	5090.67	0.0720747		0.02
20.6	2057	42374.2	0.600233		0.01
20.59	9	185.31	0.0026262		-3.90799e-14
20.58	478	9837.24	0.139481		-0.01
20.57	84	1727.88	0.0245112		-0.02
20.56	10	205.6	0.002918		-0.03
20.55	11	226.05	0.0032098		-0.04
20.54	0	0	0		-0.05
20.53	0	0	0		-0.06
20.52	11	225.72	0.0032098		-0.07
20.51	363	7445.13	0.105924		-0.08
20.5	21	430.5	0.00612781		-0.09
	3427	20.5906
