# Supplementary material for: Interaction Wave Functions and Interaction-Based Coherence and Entanglement in Complex Adaptive Systems
Source: Research Square preprint supplement (doi:10.21203/rs.3.rs-6846233/v1), 2025-06-16
Supplement: Supplementary file 653 [file 30613.xls]

## Sheet: Sheet1
20.6	230	4738	0.116989		0.09
20.59	43	885.37	0.0218718		0.08
20.58	90	1852.2	0.0457782		0.07
20.57	6	123.42	0.00305188		0.06
20.56	3	61.68	0.00152594		0.05
20.55	119	2445.45	0.060529		0.04
20.54	0	0	0		0.03
20.53	285	5851.05	0.144964		0.02
20.52	78	1600.56	0.0396745		0.01
20.51	157	3220.07	0.0798576		0
20.5	332	6806	0.168871		-0.01
20.49	31	635.19	0.0157681		-0.02
20.48	148	3031.04	0.0752798		-0.03
20.47	74	1514.78	0.0376399		-0.04
20.46	58	1186.68	0.0295015		-0.05
20.45	47	961.15	0.0239064		-0.06
20.44	49	1001.56	0.0249237		-0.07
20.43	0	0	0		-0.08
20.42	3	61.26	0.00152594		-0.09
20.41	0	0	0		-0.1
20.4	186	3794.4	0.0946083		-0.11
20.39	13	265.07	0.00661241		-0.12
20.38	0	0	0		-0.13
20.37	14	285.18	0.00712106		-0.14
	1966	20.5087
