# Supplementary material for: Interaction Wave Functions and Interaction-Based Coherence and Entanglement in Complex Adaptive Systems
Source: Research Square preprint supplement (doi:10.21203/rs.3.rs-6846233/v1), 2025-06-16
Supplement: Supplementary file 654 [file 30616-20.xls]

## Sheet: Sheet1
0.24	5					5	1.2	8.62039e-05
0.23	0					0	0	0
0.22	0		64			64	14.08	0.00110341
0.21	0		0			0	0	0
0.2	0		28			28	5.6	0.000482742
0.19	0		88			88	16.72	0.00151719
0.18	0		170			170	30.6	0.00293093
0.17	11	45	0			56	9.52	0.000965484
0.16	1	0	24			25	4	0.00043102
0.15	0	0	478			478	71.7	0.0082411
0.14	0	1317	120			1437	201.18	0.024775
0.13	0	0	1			1	0.13	1.72408e-05
0.12	0	0	60			60	7.2	0.00103445
0.11	0	0	4			4	0.44	6.89631e-05
0.1	0	19	1839			1858	185.8	0.0320334
0.09	0	193	18	101		312	28.08	0.00537912
0.08	2	2	89	0	2	95	7.6	0.00163787
0.07	0	99	0	41	3	143	10.01	0.00246543
0.06	216	52	700	122	147	1237	74.22	0.0213269
0.05	0	2	4189	130	0	4321	216.05	0.0744974
0.04	8	854	42	880	38	1822	72.88	0.0314127
0.03	10	64	0	43	11	128	3.84	0.00220682
0.02	109	106	616	30	97	958	19.16	0.0165167
0.01	575	18	1152	144	1356	3245	32.45	0.0559463
-8.67362e-17	387	106	9385	112	12	10002	-8.67535e-13	0.172442
-0.01	5	1113	4788	1023	103	7032	-70.32	0.121237
-0.02	8	199	1537	38	36	1818	-36.36	0.0313437
-0.03	13	103	5910	91	122	6239	-187.17	0.107565
-0.04	1892	784	2199	125	140	5140	-205.6	0.0886176
-0.05	275	2204	5299	317	0	8095	-404.75	0.139564
-0.06	23	2418	5	293	0	2739	-164.34	0.0472225
-0.07	0	69		0	74	143	-10.01	0.00246543
-0.08	3			43		46	-3.68	0.000793076
-0.09	200			0		200	-18	0.00344816
-0.1				13		13	-1.3	0.00022413
						58002	-0.00153564
