# Supplementary material for: Interaction Wave Functions and Interaction-Based Coherence and Entanglement in Complex Adaptive Systems
Source: Research Square preprint supplement (doi:10.21203/rs.3.rs-6846233/v1), 2025-06-16
Supplement: Supplementary file 655 [file 30616.xls]

## Sheet: Sheet1
20.58	5	102.9	0.00133761		0.24
20.57	0	0	0		0.23
20.56	0	0	0		0.22
20.55	0	0	0		0.21
20.54	0	0	0		0.2
20.53	0	0	0		0.19
20.52	0	0	0		0.18
20.51	11	225.61	0.00294275		0.17
20.5	1	20.5	0.000267523		0.16
20.49	0	0	0		0.15
20.48	0	0	0		0.14
20.47	0	0	0		0.13
20.46	0	0	0		0.12
20.45	0	0	0		0.11
20.44	0	0	0		0.1
20.43	0	0	0		0.09
20.42	2	40.84	0.000535045		0.08
20.41	0	0	0		0.07
20.4	216	4406.4	0.0577849		0.06
20.39	0	0	0		0.05
20.38	8	163.04	0.00214018		0.04
20.37	10	203.7	0.00267523		0.03
20.36	109	2219.24	0.02916		0.02
20.35	575	11701.2	0.153826		0.01
20.34	387	7871.58	0.103531		-3.90799e-14
20.33	5	101.65	0.00133761		-0.01
20.32	8	162.56	0.00214018		-0.02
20.31	13	264.03	0.0034778		-0.03
20.3	1892	38407.6	0.506153		-0.04
20.29	275	5579.75	0.0735688		-0.05
20.28	23	466.44	0.00615302		-0.06
20.27	0	0	0		-0.07
20.26	3	60.78	0.000802568		-0.08
20.25	200	4050	0.0535045		-0.09
	3738	20.3445
