# Supplementary material for: Interaction Wave Functions and Interaction-Based Coherence and Entanglement in Complex Adaptive Systems
Source: Research Square preprint supplement (doi:10.21203/rs.3.rs-6846233/v1), 2025-06-16
Supplement: Supplementary file 656 [file 30617.xls]

## Sheet: Sheet1
20.23	45	910.35	0.00460735		0.17
20.22	0	0	0		0.16
20.21	0	0	0		0.15
20.2	1317	26603.4	0.134842		0.14
20.19	0	0	0		0.13
20.18	0	0	0		0.12
20.17	0	0	0		0.11
20.16	19	383.04	0.00194533		0.1
20.15	193	3888.95	0.0197604		0.09
20.14	2	40.28	0.000204771		0.08
20.13	99	1992.87	0.0101362		0.07
20.12	52	1046.24	0.00532405		0.06
20.11	2	40.22	0.000204771		0.05
20.1	854	17165.4	0.0874373		0.04
20.09	64	1285.76	0.00655268		0.03
20.08	106	2128.48	0.0108529		0.02
20.07	18	361.26	0.00184294		0.01
20.06	106	2126.36	0.0108529		0
20.05	1113	22315.6	0.113955		-0.01
20.04	199	3987.96	0.0203747		-0.02
20.03	103	2063.09	0.0105457		-0.03
20.02	784	15695.7	0.0802703		-0.04
20.01	2204	44102	0.225658		-0.05
20	2418	48360	0.247568		-0.06
19.99	69	1379.31	0.00706461		-0.07
	9767	20.0549
