# Supplementary material for: Interaction Wave Functions and Interaction-Based Coherence and Entanglement in Complex Adaptive Systems
Source: Research Square preprint supplement (doi:10.21203/rs.3.rs-6846233/v1), 2025-06-16
Supplement: Supplementary file 657 [file 30618.xls]

## Sheet: Sheet1
20.02	64	1281.28	0.00164927		0.22
20.01	0	0	0		0.21
20	28	560	0.000721557		0.2
19.99	88	1759.12	0.00226775		0.19
19.98	170	3396.6	0.00438088		0.18
19.97	0	0	0		0.17
19.96	24	479.04	0.000618477		0.16
19.95	478	9536.1	0.012318		0.15
19.94	120	2392.8	0.00309239		0.14
19.93	1	19.93	2.57699e-05		0.13
19.92	60	1195.2	0.00154619		0.12
19.91	4	79.64	0.00010308		0.11
19.9	1839	36596.1	0.0473908		0.1
19.89	18	358.02	0.000463858		0.09
19.88	89	1769.32	0.00229352		0.08
19.87	0	0	0		0.07
19.86	700	13902	0.0180389		0.06
19.85	4189	83151.6	0.10795		0.05
19.84	42	833.28	0.00108233		0.04
19.83	0	0	0		0.03
19.82	616	12209.1	0.0158742		0.02
19.81	1152	22821.1	0.0296869		0.01
19.8	9385	185823	0.24185		-3.55271e-14
19.79	4788	94754.5	0.123386		-0.01
19.78	1537	30401.9	0.0396083		-0.02
19.77	5910	116841	0.1523		-0.03
19.76	2199	43452.2	0.056668		-0.04
19.75	5299	104655	0.136555		-0.05
19.74	5	98.7	0.000128849		-0.06
	38805	19.8007
