# Supplementary material for: Interaction Wave Functions and Interaction-Based Coherence and Entanglement in Complex Adaptive Systems
Source: Research Square preprint supplement (doi:10.21203/rs.3.rs-6846233/v1), 2025-06-16
Supplement: Supplementary file 658 [file 30619.xls]

## Sheet: Sheet1
20	101	2020	0.0284828		0.09
19.99	0	0	0		0.08
19.98	41	819.18	0.0115623		0.07
19.97	122	2436.34	0.034405		0.06
19.96	130	2594.8	0.036661		0.05
19.95	880	17556	0.248167		0.04
19.94	43	857.42	0.0121263		0.03
19.93	30	597.9	0.00846024		0.02
19.92	144	2868.48	0.0406091		0.01
19.91	112	2229.92	0.0315849		0
19.9	1023	20357.7	0.288494		-0.01
19.89	38	755.82	0.0107163		-0.02
19.88	91	1809.08	0.0256627		-0.03
19.87	125	2483.75	0.035251		-0.04
19.86	317	6295.62	0.0893965		-0.05
19.85	293	5816.05	0.0826283		-0.06
19.84	0	0	0		-0.07
19.83	43	852.69	0.0121263		-0.08
19.82	0	0	0		-0.09
19.81	13	257.53	0.0036661		-0.1
	3546	19.9121
