# Supplementary material for: Interaction Wave Functions and Interaction-Based Coherence and Entanglement in Complex Adaptive Systems
Source: Research Square preprint supplement (doi:10.21203/rs.3.rs-6846233/v1), 2025-06-16
Supplement: Supplementary file 659 [file 30620.xls]

## Sheet: Sheet1
19.97	2	39.94	0.000934143		0.08
19.96	3	59.88	0.00140121		0.07
19.95	147	2932.65	0.0686595		0.06
19.94	0	0	0		0.05
19.93	38	757.34	0.0177487		0.04
19.92	11	219.12	0.00513779		0.03
19.91	97	1931.27	0.0453059		0.02
19.9	1356	26984.4	0.633349		0.01
19.89	12	238.68	0.00560486		0
19.88	103	2047.64	0.0481084		-0.01
19.87	36	715.32	0.0168146		-0.02
19.86	122	2422.92	0.0569827		-0.03
19.85	140	2779	0.06539		-0.04
19.84	0	0	0		-0.05
19.83	0	0	0		-0.06
19.82	74	1466.68	0.0345633		-0.07
	2141	19.8948
