# Supplementary material for: Interaction Wave Functions and Interaction-Based Coherence and Entanglement in Complex Adaptive Systems
Source: Research Square preprint supplement (doi:10.21203/rs.3.rs-6846233/v1), 2025-06-16
Supplement: Supplementary file 660 [file 30623-27.xls]

## Sheet: Sheet1
0.32					511	511	163.52	0.0331431
0.31					0	0	0	0
0.3					0	0	0	0
0.29	3				0	3	0.87	0.000194578
0.28	0				0	0	0	0
0.27	23				0	23	6.21	0.00149176
0.26	0				0	0	0	0
0.25	0				0	0	0	0
0.24	0				0	0	0	0
0.23	0				0	0	0	0
0.22	0				0	0	0	0
0.21	0				0	0	0	0
0.2	0				0	0	0	0
0.19	0				0	0	0	0
0.18	0				0	0	0	0
0.17	0				0	0	0	0
0.16	0				0	0	0	0
0.15	0				0	0	0	0
0.14	0				0	0	0	0
0.13	0				0	0	0	0
0.12	0				0	0	0	0
0.11	0		500		0	500	55	0.0324296
0.1	0	115	0	56	0	171	17.1	0.0110909
0.09	0	37	900	0	0	937	84.33	0.0607731
0.08	0	84	0	24	0	108	8.64	0.0070048
0.07	0	0	0	2	0	2	0.14	0.000129719
0.06	0	0	0	50	0	50	3	0.00324296
0.05	153	5	0	228	0	386	19.3	0.0250357
0.04	460	320	0	178	0	958	38.32	0.0621352
0.03	0	20	0	303	0	323	9.69	0.0209495
0.02	88	40	0	185	51	364	7.28	0.0236088
0.01	90	27	0	124	24	265	2.65	0.0171877
-1.42247e-16	242	164	0	2210	39	2655	-3.77667e-13	0.172201
-0.01	2035	864	0	1167	37	4103	-41.03	0.266118
-0.02	22	83	0	1299	0	1404	-28.08	0.0910624
-0.03	58	85	116	5	0	264	-7.92	0.0171228
-0.04	20	54	50	15	0	139	-5.56	0.00901544
-0.05	114	24	166	7	0	311	-15.55	0.0201712
-0.06	18	244	58	0	0	320	-19.2	0.020755
-0.07			0	0	5	5	-0.35	0.000324296
-0.08			0	0	175	175	-14	0.0113504
-0.09			101	0	84	185	-16.65	0.011999
-0.1			3	0	13	16	-1.6	0.00103775
-0.11			124	0	0	124	-13.64	0.00804255
-0.12			11	29	13	53	-6.36	0.00343754
-0.13			399	0	27	426	-55.38	0.02763
-0.14			4	0	0	4	-0.56	0.000259437
-0.15			0	5	0	5	-0.75	0.000324296
-0.16			0	0	0	0	0	0
-0.17			20	0	9	29	-4.93	0.00188092
-0.18			69	0	61	130	-23.4	0.0084317
-0.19			100	12	0	112	-21.28	0.00726424
-0.2					0	0	0	0
-0.21					41	41	-8.61	0.00265923
-0.22					0	0	0	0
-0.23					21	21	-4.83	0.00136204
-0.24					0	0	0	0
-0.25					0	0	0	0
-0.26					0	0	0	0
-0.27					0	0	0	0
-0.28					55	55	-15.4	0.00356726
-0.29					0	0	0	0
-0.3					0	0	0	0
-0.31					2	2	-0.62	0.000129719
-0.32					0	0	0	0
-0.33					15	15	-4.95	0.000972889
-0.34					0	0	0	0
-0.35					0	0	0	0
-0.36					0	0	0	0
-0.37					59	59	-21.83	0.0038267
-0.38					133	133	-50.54	0.00862628
-0.39					0	0	0	0
-0.4					0	0	0	0
-0.41					0	0	0	0
-0.42					0	0	0	0
-0.43					21	21	-9.03	0.00136204
-0.44					0	0	0	0
-0.45					5	5	-2.25	0.000324296
-0.46					0	0	0	0
-0.47					5	5	-2.35	0.000324296
						15418	0.00125827
