# Supplementary material for: Interaction Wave Functions and Interaction-Based Coherence and Entanglement in Complex Adaptive Systems
Source: Research Square preprint supplement (doi:10.21203/rs.3.rs-6846233/v1), 2025-06-16
Supplement: Supplementary file 661 [file 30623.xls]

## Sheet: Sheet1
19.9	3	59.7	0.000901984		0.29
19.89	0	0	0		0.28
19.88	23	457.24	0.00691521		0.27
19.87	0	0	0		0.26
19.86	0	0	0		0.25
19.85	0	0	0		0.24
19.84	0	0	0		0.23
19.83	0	0	0		0.22
19.82	0	0	0		0.21
19.81	0	0	0		0.2
19.8	0	0	0		0.19
19.79	0	0	0		0.18
19.78	0	0	0		0.17
19.77	0	0	0		0.16
19.76	0	0	0		0.15
19.75	0	0	0		0.14
19.74	0	0	0		0.13
19.73	0	0	0		0.12
19.72	0	0	0		0.11
19.71	0	0	0		0.1
19.7	0	0	0		0.09
19.69	0	0	0		0.08
19.68	0	0	0		0.07
19.67	0	0	0		0.06
19.66	153	3007.98	0.0460012		0.05
19.65	460	9039	0.138304		0.04
19.64	0	0	0		0.03
19.63	88	1727.44	0.0264582		0.02
19.62	90	1765.8	0.0270595		0.01
19.61	242	4745.62	0.0727601		-4.61853e-14
19.6	2035	39886	0.611846		-0.01
19.59	22	430.98	0.00661455		-0.02
19.58	58	1135.64	0.0174384		-0.03
19.57	20	391.4	0.00601323		-0.04
19.56	114	2229.84	0.0342754		-0.05
19.55	18	351.9	0.00541191		-0.06
	3326	19.6117
