# Supplementary material for: Interaction Wave Functions and Interaction-Based Coherence and Entanglement in Complex Adaptive Systems
Source: Research Square preprint supplement (doi:10.21203/rs.3.rs-6846233/v1), 2025-06-16
Supplement: Supplementary file 662 [file 30624.xls]

## Sheet: Sheet1
19.66	115	2260.9	0.0530933		0.1
19.65	37	727.05	0.0170822		0.09
19.64	84	1649.76	0.0387812		0.08
19.63	0	0	0		0.07
19.62	0	0	0		0.06
19.61	5	98.05	0.0023084		0.05
19.6	320	6272	0.147738		0.04
19.59	20	391.8	0.00923361		0.03
19.58	40	783.2	0.0184672		0.02
19.57	27	528.39	0.0124654		0.01
19.56	164	3207.84	0.0757156		0
19.55	864	16891.2	0.398892		-0.01
19.54	83	1621.82	0.0383195		-0.02
19.53	85	1660.05	0.0392428		-0.03
19.52	54	1054.08	0.0249307		-0.04
19.51	24	468.24	0.0110803		-0.05
19.5	244	4758	0.11265		-0.06
	2166	19.5625
