# Supplementary material for: Interaction Wave Functions and Interaction-Based Coherence and Entanglement in Complex Adaptive Systems
Source: Research Square preprint supplement (doi:10.21203/rs.3.rs-6846233/v1), 2025-06-16
Supplement: Supplementary file 663 [file 30625.xls]

## Sheet: Sheet1
19.9	500	9950	0.190767		0.11
19.89	0	0	0		0.1
19.88	900	17892	0.34338		0.09
19.87	0	0	0		0.08
19.86	0	0	0		0.07
19.85	0	0	0		0.06
19.84	0	0	0		0.05
19.83	0	0	0		0.04
19.82	0	0	0		0.03
19.81	0	0	0		0.02
19.8	0	0	0		0.01
19.79	0	0	0		0
19.78	0	0	0		-0.01
19.77	0	0	0		-0.02
19.76	116	2292.16	0.0442579		-0.03
19.75	50	987.5	0.0190767		-0.04
19.74	166	3276.84	0.0633346		-0.05
19.73	58	1144.34	0.022129		-0.06
19.72	0	0	0		-0.07
19.71	0	0	0		-0.08
19.7	101	1989.7	0.0385349		-0.09
19.69	3	59.07	0.0011446		-0.1
19.68	124	2440.32	0.0473102		-0.11
19.67	11	216.37	0.00419687		-0.12
19.66	399	7844.34	0.152232		-0.13
19.65	4	78.6	0.00152614		-0.14
19.64	0	0	0		-0.15
19.63	0	0	0		-0.16
19.62	20	392.4	0.00763068		-0.17
19.61	69	1353.09	0.0263258		-0.18
19.6	100	1960	0.0381534		-0.19
	2621	19.7927
