# Supplementary material for: Interaction Wave Functions and Interaction-Based Coherence and Entanglement in Complex Adaptive Systems
Source: Research Square preprint supplement (doi:10.21203/rs.3.rs-6846233/v1), 2025-06-16
Supplement: Supplementary file 664 [file 30626.xls]

## Sheet: Sheet1
20	56	1120	0.00949313		0.1
19.99	0	0	0		0.09
19.98	24	479.52	0.00406849		0.08
19.97	2	39.94	0.000339041		0.07
19.96	50	998	0.00847601		0.06
19.95	228	4548.6	0.0386506		0.05
19.94	178	3549.32	0.0301746		0.04
19.93	303	6038.79	0.0513646		0.03
19.92	185	3685.2	0.0313612		0.02
19.91	124	2468.84	0.0210205		0.01
19.9	2210	43979	0.37464		0
19.89	1167	23211.6	0.19783		-0.01
19.88	1299	25824.1	0.220207		-0.02
19.87	5	99.35	0.000847601		-0.03
19.86	15	297.9	0.0025428		-0.04
19.85	7	138.95	0.00118664		-0.05
19.84	0	0	0		-0.06
19.83	0	0	0		-0.07
19.82	0	0	0		-0.08
19.81	0	0	0		-0.09
19.8	0	0	0		-0.1
19.79	0	0	0		-0.11
19.78	29	573.62	0.00491609		-0.12
19.77	0	0	0		-0.13
19.76	0	0	0		-0.14
19.75	5	98.75	0.000847601		-0.15
19.74	0	0	0		-0.16
19.73	0	0	0		-0.17
19.72	0	0	0		-0.18
19.71	12	236.52	0.00203424		-0.19
	5899	19.8997
