# Supplementary material for: Interaction Wave Functions and Interaction-Based Coherence and Entanglement in Complex Adaptive Systems
Source: Research Square preprint supplement (doi:10.21203/rs.3.rs-6846233/v1), 2025-06-16
Supplement: Supplementary file 665 [file 30627.xls]

## Sheet: Sheet1
20.5	511	10475.5	0.363442		0.32
20.49	0	0	0		0.31
20.48	0	0	0		0.3
20.47	0	0	0		0.29
20.46	0	0	0		0.28
20.45	0	0	0		0.27
20.44	0	0	0		0.26
20.43	0	0	0		0.25
20.42	0	0	0		0.24
20.41	0	0	0		0.23
20.4	0	0	0		0.22
20.39	0	0	0		0.21
20.38	0	0	0		0.2
20.37	0	0	0		0.19
20.36	0	0	0		0.18
20.35	0	0	0		0.17
20.34	0	0	0		0.16
20.33	0	0	0		0.15
20.32	0	0	0		0.14
20.31	0	0	0		0.13
20.3	0	0	0		0.12
20.29	0	0	0		0.11
20.28	0	0	0		0.1
20.27	0	0	0		0.09
20.26	0	0	0		0.08
20.25	0	0	0		0.07
20.24	0	0	0		0.06
20.23	0	0	0		0.05
20.22	0	0	0		0.04
20.21	0	0	0		0.03
20.2	51	1030.2	0.0362731		0.02
20.19	24	484.56	0.0170697		0.01
20.18	39	787.02	0.0277383		-4.9738e-14
20.17	37	746.29	0.0263158		-0.01
20.16	0	0	0		-0.02
20.15	0	0	0		-0.03
20.14	0	0	0		-0.04
20.13	0	0	0		-0.05
20.12	0	0	0		-0.06
20.11	5	100.55	0.00355619		-0.07
20.1	175	3517.5	0.124467		-0.08
20.09	84	1687.56	0.059744		-0.09
20.08	13	261.04	0.00924609		-0.1
20.07	0	0	0		-0.11
20.06	13	260.78	0.00924609		-0.12
20.05	27	541.35	0.0192034		-0.13
20.04	0	0	0		-0.14
20.03	0	0	0		-0.15
20.02	0	0	0		-0.16
20.01	9	180.09	0.00640114		-0.17
20	61	1220	0.0433855		-0.18
19.99	0	0	0		-0.19
19.98	0	0	0		-0.2
19.97	41	818.77	0.0291607		-0.21
19.96	0	0	0		-0.22
19.95	21	418.95	0.014936		-0.23
19.94	0	0	0		-0.24
19.93	0	0	0		-0.25
19.92	0	0	0		-0.26
19.91	0	0	0		-0.27
19.9	55	1094.5	0.0391181		-0.28
19.89	0	0	0		-0.29
19.88	0	0	0		-0.3
19.87	2	39.74	0.00142248		-0.31
19.86	0	0	0		-0.32
19.85	15	297.75	0.0106686		-0.33
19.84	0	0	0		-0.34
19.83	0	0	0		-0.35
19.82	0	0	0		-0.36
19.81	59	1168.79	0.041963		-0.37
19.8	133	2633.4	0.0945946		-0.38
19.79	0	0	0		-0.39
19.78	0	0	0		-0.4
19.77	0	0	0		-0.41
19.76	0	0	0		-0.42
19.75	21	414.75	0.014936		-0.43
19.74	0	0	0		-0.44
19.73	5	98.65	0.00355619		-0.45
19.72	0	0	0		-0.46
19.71	5	98.55	0.00355619		-0.47
	1406	20.1823
