# Supplementary material for: Interaction Wave Functions and Interaction-Based Coherence and Entanglement in Complex Adaptive Systems
Source: Research Square preprint supplement (doi:10.21203/rs.3.rs-6846233/v1), 2025-06-16
Supplement: Supplementary file 666 [file 30630.xls]

## Sheet: Sheet1
20.1	550	11055	0.138679
20.09	0	0	0
20.08	0	0	0
20.07	0	0	0
20.06	0	0	0
20.05	0	0	0
20.04	0	0	0
20.03	0	0	0
20.02	0	0	0
20.01	0	0	0
20	938	18760	0.23651
19.99	22	439.78	0.00554715
19.98	16	319.68	0.00403429
19.97	0	0	0
19.96	0	0	0
19.95	0	0	0
19.94	0	0	0
19.93	0	0	0
19.92	0	0	0
19.91	8	159.28	0.00201715
19.9	237	4716.3	0.0597579
19.89	0	0	0
19.88	0	0	0
19.87	0	0	0
19.86	9	178.74	0.00226929
19.85	2	39.7	0.000504286
19.84	0	0	0
19.83	50	991.5	0.0126072
19.82	0	0	0
19.81	0	0	0
19.8	1487	29442.6	0.374937
19.79	0	0	0
19.78	13	257.14	0.00327786
19.77	0	0	0
19.76	20	395.2	0.00504286
19.75	61	1204.75	0.0153807
19.74	0	0	0
19.73	0	0	0
19.72	0	0	0
19.71	5	98.55	0.00126072
19.7	518	10204.6	0.13061
19.69	0	0	0
19.68	0	0	0
19.67	0	0	0
19.66	10	196.6	0.00252143
19.65	0	0	0
19.64	0	0	0
19.63	0	0	0
19.62	0	0	0
19.61	0	0	0
19.6	20	392	0.00504286
	3966	19.8819
