# Supplementary material for: Interaction Wave Functions and Interaction-Based Coherence and Entanglement in Complex Adaptive Systems
Source: Research Square preprint supplement (doi:10.21203/rs.3.rs-6846233/v1), 2025-06-16
Supplement: Supplementary file 667 [file 30602-06.xls]

## Sheet: Sheet1
0.2				20		20	4	0.000940557
0.19				0		0	0	0
0.18				33		33	5.94	0.00155192
0.17				0		0	0	0
0.16				0	5	5	0.8	0.000235139
0.15		155		0	0	155	23.25	0.00728932
0.14		100	49	0	0	149	20.86	0.00700715
0.13		238	0	0	0	238	30.94	0.0111926
0.12	4	0	46	5	0	55	6.6	0.00258653
0.11	195	41	0	0	60	296	32.56	0.0139202
0.1	20	268	0	15	0	303	30.3	0.0142494
0.09	201	0	51	63	0	315	28.35	0.0148138
0.08	0	51	102	0	0	153	12.24	0.00719526
0.07	0	47	16	0	50	113	7.91	0.00531415
0.06	191	141	0	0	514	846	50.76	0.0397856
0.05	11	639	0	429	0	1079	53.95	0.050743
0.04	135	105	317	66	48	671	26.84	0.0315557
0.03	238	96	82	381	0	797	23.91	0.0374812
0.02	1020	42	369	56	188	1675	33.5	0.0787716
0.01	1386	99	181	220	256	2142	21.42	0.100734
-3.1225e-17	236	518	370	278	95	1497	-4.67439e-14	0.0704007
-0.01	582	310	375	30	432	1729	-17.29	0.0813111
-0.02	733	1343	72	243	453	2844	-56.88	0.133747
-0.03	725	238	308	138	453	1862	-55.86	0.0875658
-0.04	191	780	188	84	703	1946	-77.84	0.0915162
-0.05	85	71	73	697		926	-46.3	0.0435478
-0.06	259	33	72			364	-21.84	0.0171181
-0.07	40	10	0			50	-3.5	0.00235139
-0.08	2	0	0			2	-0.16	9.40557e-05
-0.09	277	98	13			388	-34.92	0.0182468
-0.1		50	32			82	-8.2	0.00385628
-0.11		0	70			70	-7.7	0.00329195
-0.12		65	0			65	-7.8	0.00305681
-0.13		0	0			0	0	0
-0.14		195	2			197	-27.58	0.00926448
-0.15		180	16			196	-29.4	0.00921746
-0.16			1			1	-0.16	4.70278e-05
						21264	0.000879421
