# Supplementary material for: Interaction Wave Functions and Interaction-Based Coherence and Entanglement in Complex Adaptive Systems
Source: Research Square preprint supplement (doi:10.21203/rs.3.rs-6846233/v1), 2025-06-16
Supplement: Supplementary file 668 [file 30602.xls]

## Sheet: Sheet1
12.41	4	49.64	0.000612464		0.12
12.4	195	2418	0.0298576		0.11
12.39	20	247.8	0.00306232		0.1
12.38	201	2488.38	0.0307763		0.09
12.37	0	0	0		0.08
12.36	0	0	0		0.07
12.35	191	2358.85	0.0292451		0.06
12.34	11	135.74	0.00168427		0.05
12.33	135	1664.55	0.0206706		0.04
12.32	238	2932.16	0.0364416		0.03
12.31	1020	12556.2	0.156178		0.02
12.3	1386	17047.8	0.212219		0.01
12.29	236	2900.44	0.0361354		0
12.28	582	7146.96	0.0891135		-0.01
12.27	733	8993.91	0.112234		-0.02
12.26	725	8888.5	0.111009		-0.03
12.25	191	2339.75	0.0292451		-0.04
12.24	85	1040.4	0.0130149		-0.05
12.23	259	3167.57	0.039657		-0.06
12.22	40	488.8	0.00612464		-0.07
12.21	2	24.42	0.000306232		-0.08
12.2	277	3379.4	0.0424131		-0.09
	6531	12.2905
