# Supplementary material for: Interaction Wave Functions and Interaction-Based Coherence and Entanglement in Complex Adaptive Systems
Source: Research Square preprint supplement (doi:10.21203/rs.3.rs-6846233/v1), 2025-06-16
Supplement: Supplementary file 669 [file 30603.xls]

## Sheet: Sheet1
12.4	155	1922	0.0262134		0.15
12.39	100	1239	0.0169119		0.14
12.38	238	2946.44	0.0402503		0.13
12.37	0	0	0		0.12
12.36	41	506.76	0.00693387		0.11
12.35	268	3309.8	0.0453239		0.1
12.34	0	0	0		0.09
12.33	51	628.83	0.00862506		0.08
12.32	47	579.04	0.00794859		0.07
12.31	141	1735.71	0.0238458		0.06
12.3	639	7859.7	0.108067		0.05
12.29	105	1290.45	0.0177575		0.04
12.28	96	1178.88	0.0162354		0.03
12.27	42	515.34	0.00710299		0.02
12.26	99	1213.74	0.0167428		0.01
12.25	518	6345.5	0.0876036		0
12.24	310	3794.4	0.0524269		-0.01
12.23	1343	16424.9	0.227127		-0.02
12.22	238	2908.36	0.0402503		-0.03
12.21	780	9523.8	0.131913		-0.04
12.2	71	866.2	0.0120074		-0.05
12.19	33	402.27	0.00558092		-0.06
12.18	10	121.8	0.00169119		-0.07
12.17	0	0	0		-0.08
12.16	98	1191.68	0.0165737		-0.09
12.15	50	607.5	0.00845594		-0.1
12.14	0	0	0		-0.11
12.13	65	788.45	0.0109927		-0.12
12.12	0	0	0		-0.13
12.11	195	2361.45	0.0329782		-0.14
12.1	180	2178	0.0304414		-0.15
	5913	12.251
