# Supplementary material for: Interaction Wave Functions and Interaction-Based Coherence and Entanglement in Complex Adaptive Systems
Source: Research Square preprint supplement (doi:10.21203/rs.3.rs-6846233/v1), 2025-06-16
Supplement: Supplementary file 670 [file 30604.xls]

## Sheet: Sheet1
12.3	49	602.7	0.0174688		0.14
12.29	0	0	0		0.13
12.28	46	564.88	0.0163993		0.12
12.27	0	0	0		0.11
12.26	0	0	0		0.1
12.25	51	624.75	0.0181818		0.09
12.24	102	1248.48	0.0363636		0.08
12.23	16	195.68	0.0057041		0.07
12.22	0	0	0		0.06
12.21	0	0	0		0.05
12.2	317	3867.4	0.113012		0.04
12.19	82	999.58	0.0292335		0.03
12.18	369	4494.42	0.131551		0.02
12.17	181	2202.77	0.0645276		0.01
12.16	370	4499.2	0.131907		0
12.15	375	4556.25	0.13369		-0.01
12.14	72	874.08	0.0256684		-0.02
12.13	308	3736.04	0.109804		-0.03
12.12	188	2278.56	0.0670232		-0.04
12.11	73	884.03	0.026025		-0.05
12.1	72	871.2	0.0256684		-0.06
12.09	0	0	0		-0.07
12.08	0	0	0		-0.08
12.07	13	156.91	0.00463458		-0.09
12.06	32	385.92	0.0114082		-0.1
12.05	70	843.5	0.0249554		-0.11
12.04	0	0	0		-0.12
12.03	0	0	0		-0.13
12.02	2	24.04	0.000713012		-0.14
12.01	16	192.16	0.0057041		-0.15
12	1	12	0.000356506		-0.16
	2805	12.162
