# Supplementary material for: Interaction Wave Functions and Interaction-Based Coherence and Entanglement in Complex Adaptive Systems
Source: Research Square preprint supplement (doi:10.21203/rs.3.rs-6846233/v1), 2025-06-16
Supplement: Supplementary file 671 [file 30605.xls]

## Sheet: Sheet1
12.25	20	245	0.00725163		0.2
12.24	0	0	0		0.19
12.23	33	403.59	0.0119652		0.18
12.22	0	0	0		0.17
12.21	0	0	0		0.16
12.2	0	0	0		0.15
12.19	0	0	0		0.14
12.18	0	0	0		0.13
12.17	5	60.85	0.00181291		0.12
12.16	0	0	0		0.11
12.15	15	182.25	0.00543872		0.1
12.14	63	764.82	0.0228426		0.09
12.13	0	0	0		0.08
12.12	0	0	0		0.07
12.11	0	0	0		0.06
12.1	429	5190.9	0.155547		0.05
12.09	66	797.94	0.0239304		0.04
12.08	381	4602.48	0.138144		0.03
12.07	56	675.92	0.0203046		0.02
12.06	220	2653.2	0.0797679		0.01
12.05	278	3349.9	0.100798		0
12.04	30	361.2	0.0108774		-0.01
12.03	243	2923.29	0.0881073		-0.02
12.02	138	1658.76	0.0500363		-0.03
12.01	84	1008.84	0.0304569		-0.04
12	697	8364	0.252719		-0.05
	2758	12.0533
