# Supplementary material for: Interaction Wave Functions and Interaction-Based Coherence and Entanglement in Complex Adaptive Systems
Source: Research Square preprint supplement (doi:10.21203/rs.3.rs-6846233/v1), 2025-06-16
Supplement: Supplementary file 672 [file 30606.xls]

## Sheet: Sheet1
12.2	5	61	0.00153516		0.16
12.19	0	0	0		0.15
12.18	0	0	0		0.14
12.17	0	0	0		0.13
12.16	0	0	0		0.12
12.15	60	729	0.0184219		0.11
12.14	0	0	0		0.1
12.13	0	0	0		0.09
12.12	0	0	0		0.08
12.11	50	605.5	0.0153516		0.07
12.1	514	6219.4	0.157814		0.06
12.09	0	0	0		0.05
12.08	48	579.84	0.0147375		0.04
12.07	0	0	0		0.03
12.06	188	2267.28	0.0577218		0.02
12.05	256	3084.8	0.0785999		0.01
12.04	95	1143.8	0.0291679		0
12.03	432	5196.96	0.132637		-0.01
12.02	453	5445.06	0.139085		-0.02
12.01	453	5440.53	0.139085		-0.03
12	703	8436	0.215843		-0.04
	3257	12.0384
