# Supplementary material for: Interaction Wave Functions and Interaction-Based Coherence and Entanglement in Complex Adaptive Systems
Source: Research Square preprint supplement (doi:10.21203/rs.3.rs-6846233/v1), 2025-06-16
Supplement: Supplementary file 673 [file 30609-13.xls]

## Sheet: Sheet1
0.24	2					2	0.48	2.85714e-05
0.23	0					0	0	0
0.22	0					0	0	0
0.21	0					0	0	0
0.2	0					0	0	0
0.19	1133					1133	215.27	0.0161857
0.18	0					0	0	0
0.17	24					24	4.08	0.000342857
0.16	0				41	41	6.56	0.000585714
0.15	0				55	55	8.25	0.000785714
0.14	2784				15	2799	391.86	0.0399857
0.13	0				89	89	11.57	0.00127143
0.12	0				0	0	0	0
0.11	0	159			230	389	42.79	0.00555714
0.1	10	645			302	957	95.7	0.0136714
0.09	1170	130	426		127	1853	166.77	0.0264714
0.08	28	27	966		0	1021	81.68	0.0145857
0.07	99	33	4613	10	61	4816	337.12	0.0688
0.06	0	6	1340	7	142	1495	89.7	0.0213571
0.05	100	193	1747	2654	0	4694	234.7	0.0670571
0.04	968	0	2175	6068	65	9276	371.04	0.132514
0.03	0	0	4478	747	424	5649	169.47	0.0807
0.02	28	0	1318	218	461	2025	40.5	0.0289286
0.01	54	0	1024	910	345	2333	23.33	0.0333286
-8.67362e-17	0	91	1047	1272	260	2670	-2.31586e-13	0.0381429
-0.01	0	214	902	372	145	1633	-16.33	0.0233286
-0.02	0	87	1104	264	0	1455	-29.1	0.0207857
-0.03	0	100	4942	333	33	5408	-162.24	0.0772571
-0.04	0	12	1725	1289	186	3212	-128.48	0.0458857
-0.05	0	1104	287	2771	3	4165	-208.25	0.0595
-0.06	439	0	751	1089	73	2352	-141.12	0.0336
-0.07	0	0	844	77	181	1102	-77.14	0.0157429
-0.08	0	0	688	329	495	1512	-120.96	0.0216
-0.09	0	0	0	586	367	953	-85.77	0.0136143
-0.1	0	41	0	6	29	76	-7.6	0.00108571
-0.11	298	0	34	0	26	358	-39.38	0.00511429
-0.12	0	6	565	239	143	953	-114.36	0.0136143
-0.13	0	9	1276	0	124	1409	-183.17	0.0201286
-0.14	30	10	70	41	54	205	-28.7	0.00292857
-0.15	46	138	212	0		396	-59.4	0.00565714
-0.16	270	39	0	0		309	-49.44	0.00441429
-0.17	0	12	0	0		12	-2.04	0.000171429
-0.18	94	0	83	0		177	-31.86	0.00252857
-0.19	15	6	139	0		160	-30.4	0.00228571
-0.2	0	0	0	0		0	0	0
-0.21	263	2	0	0		265	-55.65	0.00378571
-0.22	32	0	0	0		32	-7.04	0.000457143
-0.23	14	0	181	0		195	-44.85	0.00278571
-0.24	0	0	60	0		60	-14.4	0.000857143
-0.25	0	15	0	200		215	-53.75	0.00307143
-0.26	185		30			215	-55.9	0.00307143
-0.27	34		127			161	-43.47	0.0023
-0.28	428		19			447	-125.16	0.00638571
-0.29	312		0			312	-90.48	0.00445714
-0.3	74		0			74	-22.2	0.00105714
-0.31	39		2			41	-12.71	0.000585714
-0.32	0		48			48	-15.36	0.000685714
-0.33	6					6	-1.98	8.57143e-05
-0.34	78					78	-26.52	0.00111429
-0.35	204					204	-71.4	0.00291429
-0.36	291					291	-104.76	0.00415714
-0.37	0					0	0	0
-0.38	0					0	0	0
-0.39	0					0	0	0
-0.4	0					0	0	0
-0.41	103					103	-42.23	0.00147143
-0.42	0					0	0	0
-0.43	0					0	0	0
-0.44	0					0	0	0
-0.45	0					0	0	0
-0.46	85					85	-39.1	0.00121429
						70000	-0.000740429
