# Supplementary material for: Interaction Wave Functions and Interaction-Based Coherence and Entanglement in Complex Adaptive Systems
Source: Research Square preprint supplement (doi:10.21203/rs.3.rs-6846233/v1), 2025-06-16
Supplement: Supplementary file 674 [file 30609.xls]

## Sheet: Sheet1
12.1	2	24.2	0.000205339		0.24
12.09	0	0	0		0.23
12.08	0	0	0		0.22
12.07	0	0	0		0.21
12.06	0	0	0		0.2
12.05	1133	13652.7	0.116324		0.19
12.04	0	0	0		0.18
12.03	24	288.72	0.00246407		0.17
12.02	0	0	0		0.16
12.01	0	0	0		0.15
12	2784	33408	0.285832		0.14
11.99	0	0	0		0.13
11.98	0	0	0		0.12
11.97	0	0	0		0.11
11.96	10	119.6	0.00102669		0.1
11.95	1170	13981.5	0.120123		0.09
11.94	28	334.32	0.00287474		0.08
11.93	99	1181.07	0.0101643		0.07
11.92	0	0	0		0.06
11.91	100	1191	0.0102669		0.05
11.9	968	11519.2	0.099384		0.04
11.89	0	0	0		0.03
11.88	28	332.64	0.00287474		0.02
11.87	54	640.98	0.00554415		0.01
11.86	0	0	0		0
11.85	0	0	0		-0.01
11.84	0	0	0		-0.02
11.83	0	0	0		-0.03
11.82	0	0	0		-0.04
11.81	0	0	0		-0.05
11.8	439	5180.2	0.0450719		-0.06
11.79	0	0	0		-0.07
11.78	0	0	0		-0.08
11.77	0	0	0		-0.09
11.76	0	0	0		-0.1
11.75	298	3501.5	0.0305955		-0.11
11.74	0	0	0		-0.12
11.73	0	0	0		-0.13
11.72	30	351.6	0.00308008		-0.14
11.71	46	538.66	0.00472279		-0.15
11.7	270	3159	0.0277207		-0.16
11.69	0	0	0		-0.17
11.68	94	1097.92	0.00965092		-0.18
11.67	15	175.05	0.00154004		-0.19
11.66	0	0	0		-0.2
11.65	263	3063.95	0.0270021		-0.21
11.64	32	372.48	0.00328542		-0.22
11.63	14	162.82	0.00143737		-0.23
11.62	0	0	0		-0.24
11.61	0	0	0		-0.25
11.6	185	2146	0.0189938		-0.26
11.59	34	394.06	0.00349076		-0.27
11.58	428	4956.24	0.0439425		-0.28
11.57	312	3609.84	0.0320329		-0.29
11.56	74	855.44	0.00759754		-0.3
11.55	39	450.45	0.00400411		-0.31
11.54	0	0	0		-0.32
11.53	6	69.18	0.000616016		-0.33
11.52	78	898.56	0.00800821		-0.34
11.51	204	2348.04	0.0209446		-0.35
11.5	291	3346.5	0.0298768		-0.36
11.49	0	0	0		-0.37
11.48	0	0	0		-0.38
11.47	0	0	0		-0.39
11.46	0	0	0		-0.4
11.45	103	1179.35	0.0105749		-0.41
11.44	0	0	0		-0.42
11.43	0	0	0		-0.43
11.42	0	0	0		-0.44
11.41	0	0	0		-0.45
11.4	85	969	0.0087269		-0.46
	9740	11.8583
