# Supplementary material for: Interaction Wave Functions and Interaction-Based Coherence and Entanglement in Complex Adaptive Systems
Source: Research Square preprint supplement (doi:10.21203/rs.3.rs-6846233/v1), 2025-06-16
Supplement: Supplementary file 675 [file 30610.xls]

## Sheet: Sheet1
12.16	159	1933.44	0.0516401		0.11
12.15	645	7836.75	0.209484		0.1
12.14	130	1578.2	0.0422215		0.09
12.13	27	327.51	0.00876908		0.08
12.12	33	399.96	0.0107178		0.07
12.11	6	72.66	0.00194868		0.06
12.1	193	2335.3	0.0626827		0.05
12.09	0	0	0		0.04
12.08	0	0	0		0.03
12.07	0	0	0		0.02
12.06	0	0	0		0.01
12.05	91	1096.55	0.0295551		0
12.04	214	2576.56	0.0695031		-0.01
12.03	87	1046.61	0.0282559		-0.02
12.02	100	1202	0.0324781		-0.03
12.01	12	144.12	0.00389737		-0.04
12	1104	13248	0.358558		-0.05
11.99	0	0	0		-0.06
11.98	0	0	0		-0.07
11.97	0	0	0		-0.08
11.96	0	0	0		-0.09
11.95	41	489.95	0.013316		-0.1
11.94	0	0	0		-0.11
11.93	6	71.58	0.00194868		-0.12
11.92	9	107.28	0.00292303		-0.13
11.91	10	119.1	0.00324781		-0.14
11.9	138	1642.2	0.0448197		-0.15
11.89	39	463.71	0.0126665		-0.16
11.88	12	142.56	0.00389737		-0.17
11.87	0	0	0		-0.18
11.86	6	71.16	0.00194868		-0.19
11.85	0	0	0		-0.2
11.84	2	23.68	0.000649562		-0.21
11.83	0	0	0		-0.22
11.82	0	0	0		-0.23
11.81	0	0	0		-0.24
11.8	15	177	0.00487171		-0.25
	3079	12.0513
