# Supplementary material for: Interaction Wave Functions and Interaction-Based Coherence and Entanglement in Complex Adaptive Systems
Source: Research Square preprint supplement (doi:10.21203/rs.3.rs-6846233/v1), 2025-06-16
Supplement: Supplementary file 676 [file 30611.xls]

## Sheet: Sheet1
12.62	426	5376.12	0.0128224		0.09
12.61	966	12181.3	0.0290762		0.08
12.6	4613	58123.8	0.13885		0.07
12.59	1340	16870.6	0.0403335		0.06
12.58	1747	21977.3	0.0525841		0.05
12.57	2175	27339.8	0.0654667		0.04
12.56	4478	56243.7	0.134786		0.03
12.55	1318	16540.9	0.0396713		0.02
12.54	1024	12841	0.030822		0.01
12.53	1047	13118.9	0.0315143		0
12.52	902	11293	0.0271499		-0.01
12.51	1104	13811	0.03323		-0.02
12.5	4942	61775	0.148752		-0.03
12.49	1725	21545.3	0.0519219		-0.04
12.48	287	3581.76	0.00863859		-0.05
12.47	751	9364.97	0.0226048		-0.06
12.46	844	10516.2	0.0254041		-0.07
12.45	688	8565.6	0.0207085		-0.08
12.44	0	0	0		-0.09
12.43	0	0	0		-0.1
12.42	34	422.28	0.00102339		-0.11
12.41	565	7011.65	0.0170063		-0.12
12.4	1276	15822.4	0.0384071		-0.13
12.39	70	867.3	0.00210697		-0.14
12.38	212	2624.56	0.00638112		-0.15
12.37	0	0	0		-0.16
12.36	0	0	0		-0.17
12.35	83	1025.05	0.00249827		-0.18
12.34	139	1715.26	0.00418385		-0.19
12.33	0	0	0		-0.2
12.32	0	0	0		-0.21
12.31	0	0	0		-0.22
12.3	181	2226.3	0.00544803		-0.23
12.29	60	737.4	0.00180598		-0.24
12.28	0	0	0		-0.25
12.27	30	368.1	0.000902989		-0.26
12.26	127	1557.02	0.00382265		-0.27
12.25	19	232.75	0.000571893		-0.28
12.24	0	0	0		-0.29
12.23	0	0	0		-0.3
12.22	2	24.44	6.01993e-05		-0.31
12.21	48	586.08	0.00144478		-0.32
	33223	12.5301
