# Supplementary material for: Interaction Wave Functions and Interaction-Based Coherence and Entanglement in Complex Adaptive Systems
Source: Research Square preprint supplement (doi:10.21203/rs.3.rs-6846233/v1), 2025-06-16
Supplement: Supplementary file 677 [file 30612.xls]

## Sheet: Sheet1
12.72	10	127.2	0.000513294		0.07
12.71	7	88.97	0.000359306		0.06
12.7	2654	33705.8	0.136228		0.05
12.69	6068	77002.9	0.311467		0.04
12.68	747	9471.96	0.0383431		0.03
12.67	218	2762.06	0.0111898		0.02
12.66	910	11520.6	0.0467098		0.01
12.65	1272	16090.8	0.065291		0
12.64	372	4702.08	0.0190945		-0.01
12.63	264	3334.32	0.013551		-0.02
12.62	333	4202.46	0.0170927		-0.03
12.61	1289	16254.3	0.0661636		-0.04
12.6	2771	34914.6	0.142234		-0.05
12.59	1089	13710.5	0.0558978		-0.06
12.58	77	968.66	0.00395237		-0.07
12.57	329	4135.53	0.0168874		-0.08
12.56	586	7360.16	0.030079		-0.09
12.55	6	75.3	0.000307977		-0.1
12.54	0	0	0		-0.11
12.53	239	2994.67	0.0122677		-0.12
12.52	0	0	0		-0.13
12.51	41	512.91	0.00210451		-0.14
12.5	0	0	0		-0.15
12.49	0	0	0		-0.16
12.48	0	0	0		-0.17
12.47	0	0	0		-0.18
12.46	0	0	0		-0.19
12.45	0	0	0		-0.2
12.44	0	0	0		-0.21
12.43	0	0	0		-0.22
12.42	0	0	0		-0.23
12.41	0	0	0		-0.24
12.4	200	2480	0.0102659		-0.25
	19482	12.6484
