# Supplementary material for: Interaction Wave Functions and Interaction-Based Coherence and Entanglement in Complex Adaptive Systems
Source: Research Square preprint supplement (doi:10.21203/rs.3.rs-6846233/v1), 2025-06-16
Supplement: Supplementary file 678 [file 30613.xls]

## Sheet: Sheet1
12.75	41	522.75	0.00915996		0.16
12.74	55	700.7	0.0122878		0.15
12.73	15	190.95	0.00335121		0.14
12.72	89	1132.08	0.0198838		0.13
12.71	0	0	0		0.12
12.7	230	2921	0.0513852		0.11
12.69	302	3832.38	0.067471		0.1
12.68	127	1610.36	0.0283735		0.09
12.67	0	0	0		0.08
12.66	61	772.26	0.0136282		0.07
12.65	142	1796.3	0.0317248		0.06
12.64	0	0	0		0.05
12.63	65	820.95	0.0145219		0.04
12.62	424	5350.88	0.0947274		0.03
12.61	461	5813.21	0.102994		0.02
12.6	345	4347	0.0770777		0.01
12.59	260	3273.4	0.0580876		0
12.58	145	1824.1	0.032395		-0.01
12.57	0	0	0		-0.02
12.56	33	414.48	0.00737265		-0.03
12.55	186	2334.3	0.041555		-0.04
12.54	3	37.62	0.000670241		-0.05
12.53	73	914.69	0.0163092		-0.06
12.52	181	2266.12	0.0404379		-0.07
12.51	495	6192.45	0.11059		-0.08
12.5	367	4587.5	0.0819929		-0.09
12.49	29	362.21	0.006479		-0.1
12.48	26	324.48	0.00580876		-0.11
12.47	143	1783.21	0.0319482		-0.12
12.46	124	1545.04	0.0277033		-0.13
12.45	54	672.3	0.0120643		-0.14
	4476	12.5877
