# Supplementary material for: Interaction Wave Functions and Interaction-Based Coherence and Entanglement in Complex Adaptive Systems
Source: Research Square preprint supplement (doi:10.21203/rs.3.rs-6846233/v1), 2025-06-16
Supplement: Supplementary file 679 [file 30616-20.xls]

## Sheet: Sheet1
0.34	471					471	160.14	0.00693096
0.33	277					277	91.41	0.00407617
0.32	5					5	1.6	7.3577e-05
0.31	154					154	47.74	0.00226617
0.3	5					5	1.5	7.3577e-05
0.29	322					322	93.38	0.00473836
0.28	0					0	0	0
0.27	0					0	0	0
0.26	0					0	0	0
0.25	0					0	0	0
0.24	300					300	72	0.00441462
0.23	0					0	0	0
0.22	13					13	2.86	0.0001913
0.21	0					0	0	0
0.2	0					0	0	0
0.19	29					29	5.51	0.000426747
0.18	0					0	0	0
0.17	48					48	8.16	0.000706339
0.16	0					0	0	0
0.15	153					153	22.95	0.00225146
0.14	2108					2108	295.12	0.0310201
0.13	231					231	30.03	0.00339926
0.12	1466			2	35	1503	180.36	0.0221173
0.11	303	2284		0	0	2587	284.57	0.0380688
0.1	214	608	34	0	166	1022	102.2	0.0150391
0.09	159	305	12	0	0	476	42.84	0.00700453
0.08	0	542	28	0	178	748	59.84	0.0110071
0.07	0	579	168	0	294	1041	72.87	0.0153187
0.06	0	808	305	252	278	1643	98.58	0.0241774
0.05	0	469	220	6	120	815	40.75	0.0119931
0.04	775	706	680	367	104	2632	105.28	0.0387309
0.03	1458	1111	390	263	6	3228	96.84	0.0475013
0.02	1367	1939	1327	1136	209	5978	119.56	0.0879687
0.01	655	2824	3142	141	832	7594	75.94	0.111749
-1.42247e-16	1416	636	478	481	679	3690	-5.24893e-13	0.0542998
-0.01	3541	1445	186	98	179	5449	-54.49	0.0801842
-0.02	1251	1209	439	441	206	3546	-70.92	0.0521808
-0.03	889	2020	432	649	238	4228	-126.84	0.0622167
-0.04	856	364	217	17	45	1499	-59.96	0.0220584
-0.05	529	615	14	8	266	1432	-71.6	0.0210725
-0.06	2637	199	129	0	0	2965	-177.9	0.0436312
-0.07	325	653	679	6	0	1663	-116.41	0.0244717
-0.08	781	187	164	282	0	1414	-113.12	0.0208076
-0.09	1665	1079	450	0	0	3194	-287.46	0.047001
-0.1	407	125	11	0	0	543	-54.3	0.00799046
-0.11	571	54		20	0	645	-70.95	0.00949144
-0.12	482	0		18	0	500	-60	0.0073577
-0.13	448	376		124	0	948	-123.24	0.0139502
-0.14	223	179			0	402	-56.28	0.00591559
-0.15	314	152			0	466	-69.9	0.00685738
-0.16	877	2			0	879	-140.64	0.0129348
-0.17	58	477			0	535	-90.95	0.00787274
-0.18	121	54			0	175	-31.5	0.0025752
-0.19	76	38			0	114	-21.66	0.00167756
-0.2	4				0	4	-0.8	5.88616e-05
-0.21	3				0	3	-0.63	4.41462e-05
-0.22	0				0	0	0	0
-0.23	10				0	10	-2.3	0.000147154
-0.24	0				0	0	0	0
-0.25	0				0	0	0	0
-0.26	5				0	5	-1.3	7.3577e-05
-0.27	0				0	0	0	0
-0.28	30				0	30	-8.4	0.000441462
-0.29	0				0	0	0	0
-0.3	0				0	0	0	0
-0.31	18				0	18	-5.58	0.000264877
-0.32	6				210	216	-69.12	0.00317853
						67956	0.00332244
