# Supplementary material for: Interaction Wave Functions and Interaction-Based Coherence and Entanglement in Complex Adaptive Systems
Source: Research Square preprint supplement (doi:10.21203/rs.3.rs-6846233/v1), 2025-06-16
Supplement: Supplementary file 680 [file 30616.xls]

## Sheet: Sheet1
13.2	471	6217.2	0.0167879		0.34
13.19	277	3653.63	0.00987311		0.33
13.18	5	65.9	0.000178215		0.32
13.17	154	2028.18	0.00548902		0.31
13.16	5	65.8	0.000178215		0.3
13.15	322	4234.3	0.011477		0.29
13.14	0	0	0		0.28
13.13	0	0	0		0.27
13.12	0	0	0		0.26
13.11	0	0	0		0.25
13.1	300	3930	0.0106929		0.24
13.09	0	0	0		0.23
13.08	13	170.04	0.000463359		0.22
13.07	0	0	0		0.21
13.06	0	0	0		0.2
13.05	29	378.45	0.00103365		0.19
13.04	0	0	0		0.18
13.03	48	625.44	0.00171086		0.17
13.02	0	0	0		0.16
13.01	153	1990.53	0.00545338		0.15
13	2108	27404	0.0751354		0.14
12.99	231	3000.69	0.00823353		0.13
12.98	1466	19028.7	0.0522526		0.12
12.97	303	3929.91	0.0107998		0.11
12.96	214	2773.44	0.0076276		0.1
12.95	159	2059.05	0.00566724		0.09
12.94	0	0	0		0.08
12.93	0	0	0		0.07
12.92	0	0	0		0.06
12.91	0	0	0		0.05
12.9	775	9997.5	0.0276233		0.04
12.89	1458	18793.6	0.0519675		0.03
12.88	1367	17607	0.048724		0.02
12.87	655	8429.85	0.0233462		0.01
12.86	1416	18209.8	0.0504705		0
12.85	3541	45501.9	0.126212		-0.01
12.84	1251	16062.8	0.0445894		-0.02
12.83	889	11405.9	0.0316866		-0.03
12.82	856	10973.9	0.0305104		-0.04
12.81	529	6776.49	0.0188551		-0.05
12.8	2637	33753.6	0.0939906		-0.06
12.79	325	4156.75	0.011584		-0.07
12.78	781	9981.18	0.0278372		-0.08
12.77	1665	21262.1	0.0593456		-0.09
12.76	407	5193.32	0.0145067		-0.1
12.75	571	7280.25	0.0203522		-0.11
12.74	482	6140.68	0.0171799		-0.12
12.73	448	5703.04	0.0159681		-0.13
12.72	223	2836.56	0.00794839		-0.14
12.71	314	3990.94	0.0111919		-0.15
12.7	877	11137.9	0.0312589		-0.16
12.69	58	736.02	0.00206729		-0.17
12.68	121	1534.28	0.0043128		-0.18
12.67	76	962.92	0.00270887		-0.19
12.66	4	50.64	0.000142572		-0.2
12.65	3	37.95	0.000106929		-0.21
12.64	0	0	0		-0.22
12.63	10	126.3	0.00035643		-0.23
12.62	0	0	0		-0.24
12.61	0	0	0		-0.25
12.6	5	63	0.000178215		-0.26
12.59	0	0	0		-0.27
12.58	30	377.4	0.00106929		-0.28
12.57	0	0	0		-0.29
12.56	0	0	0		-0.3
12.55	18	225.9	0.000641574		-0.31
12.54	6	75.24	0.000213858		-0.32
	28056	12.865
