# Supplementary material for: Interaction Wave Functions and Interaction-Based Coherence and Entanglement in Complex Adaptive Systems
Source: Research Square preprint supplement (doi:10.21203/rs.3.rs-6846233/v1), 2025-06-16
Supplement: Supplementary file 681 [file 30617.xls]

## Sheet: Sheet1
13	2284	29692	0.103634		0.11
12.99	608	7897.92	0.0275875		0.1
12.98	305	3958.9	0.0138391		0.09
12.97	542	7029.74	0.0245928		0.08
12.96	579	7503.84	0.0262716		0.07
12.95	808	10463.6	0.0366623		0.06
12.94	469	6068.86	0.0212805		0.05
12.93	706	9128.58	0.0320341		0.04
12.92	1111	14354.1	0.0504106		0.03
12.91	1939	25032.5	0.0879804		0.02
12.9	2824	36429.6	0.128136		0.01
12.89	636	8198.04	0.0288579		0
12.88	1445	18611.6	0.0655656		-0.01
12.87	1209	15559.8	0.0548573		-0.02
12.86	2020	25977.2	0.0916557		-0.03
12.85	364	4677.4	0.0165162		-0.04
12.84	615	7896.6	0.0279051		-0.05
12.83	199	2553.17	0.00902945		-0.06
12.82	653	8371.46	0.0296293		-0.07
12.81	187	2395.47	0.00848496		-0.08
12.8	1079	13811.2	0.0489587		-0.09
12.79	125	1598.75	0.00567176		-0.1
12.78	54	690.12	0.0024502		-0.11
12.77	0	0	0		-0.12
12.76	376	4797.76	0.0170607		-0.13
12.75	179	2282.25	0.00812197		-0.14
12.74	152	1936.48	0.00689686		-0.15
12.73	2	25.46	9.07482e-05		-0.16
12.72	477	6067.44	0.0216435		-0.17
12.71	54	686.34	0.0024502		-0.18
12.7	38	482.6	0.00172422		-0.19
	22039	12.8944
