# Supplementary material for: Interaction Wave Functions and Interaction-Based Coherence and Entanglement in Complex Adaptive Systems
Source: Research Square preprint supplement (doi:10.21203/rs.3.rs-6846233/v1), 2025-06-16
Supplement: Supplementary file 682 [file 30618.xls]

## Sheet: Sheet1
12.99	34	441.66	0.00357706		0.1
12.98	12	155.76	0.00126249		0.09
12.97	28	363.16	0.00294582		0.08
12.96	168	2177.28	0.0176749		0.07
12.95	305	3949.75	0.0320884		0.06
12.94	220	2846.8	0.0231457		0.05
12.93	680	8792.4	0.0715413		0.04
12.92	390	5038.8	0.041031		0.03
12.91	1327	17131.6	0.139611		0.02
12.9	3142	40531.8	0.330563		0.01
12.89	478	6161.42	0.0502893		0
12.88	186	2395.68	0.0195686		-0.01
12.87	439	5649.93	0.0461862		-0.02
12.86	432	5555.52	0.0454498		-0.03
12.85	217	2788.45	0.0228301		-0.04
12.84	14	179.76	0.00147291		-0.05
12.83	129	1655.07	0.0135718		-0.06
12.82	679	8704.78	0.0714361		-0.07
12.81	164	2100.84	0.0172541		-0.08
12.8	450	5760	0.0473435		-0.09
12.79	11	140.69	0.00115729		-0.1
	9505	12.8902
