# Supplementary material for: Interaction Wave Functions and Interaction-Based Coherence and Entanglement in Complex Adaptive Systems
Source: Research Square preprint supplement (doi:10.21203/rs.3.rs-6846233/v1), 2025-06-16
Supplement: Supplementary file 683 [file 30619.xls]

## Sheet: Sheet1
12.95	2	25.9	0.000463929		0.12
12.94	0	0	0		0.11
12.93	0	0	0		0.1
12.92	0	0	0		0.09
12.91	0	0	0		0.08
12.9	0	0	0		0.07
12.89	252	3248.28	0.0584551		0.06
12.88	6	77.28	0.00139179		0.05
12.87	367	4723.29	0.0851311		0.04
12.86	263	3382.18	0.0610067		0.03
12.85	1136	14597.6	0.263512		0.02
12.84	141	1810.44	0.032707		0.01
12.83	481	6171.23	0.111575		0
12.82	98	1256.36	0.0227325		-0.01
12.81	441	5649.21	0.102296		-0.02
12.8	649	8307.2	0.150545		-0.03
12.79	17	217.43	0.0039434		-0.04
12.78	8	102.24	0.00185572		-0.05
12.77	0	0	0		-0.06
12.76	6	76.56	0.00139179		-0.07
12.75	282	3595.5	0.0654141		-0.08
12.74	0	0	0		-0.09
12.73	0	0	0		-0.1
12.72	20	254.4	0.00463929		-0.11
12.71	18	228.78	0.00417537		-0.12
12.7	124	1574.8	0.0287636		-0.13
	4311	12.8273
