# Supplementary material for: Interaction Wave Functions and Interaction-Based Coherence and Entanglement in Complex Adaptive Systems
Source: Research Square preprint supplement (doi:10.21203/rs.3.rs-6846233/v1), 2025-06-16
Supplement: Supplementary file 684 [file 30620.xls]

## Sheet: Sheet1
12.72	35	445.2	0.00865266		0.12
12.71	0	0	0		0.11
12.7	166	2108.2	0.0410383		0.1
12.69	0	0	0		0.09
12.68	178	2257.04	0.0440049		0.08
12.67	294	3724.98	0.0726823		0.07
12.66	278	3519.48	0.0687268		0.06
12.65	120	1518	0.0296663		0.05
12.64	104	1314.56	0.0257108		0.04
12.63	6	75.78	0.00148331		0.03
12.62	209	2637.58	0.0516687		0.02
12.61	832	10491.5	0.205686		0.01
12.6	679	8555.4	0.167862		0
12.59	179	2253.61	0.0442522		-0.01
12.58	206	2591.48	0.0509271		-0.02
12.57	238	2991.66	0.0588381		-0.03
12.56	45	565.2	0.0111248		-0.04
12.55	266	3338.3	0.0657602		-0.05
12.54	0	0	0		-0.06
12.53	0	0	0		-0.07
12.52	0	0	0		-0.08
12.51	0	0	0		-0.09
12.5	0	0	0		-0.1
12.49	0	0	0		-0.11
12.48	0	0	0		-0.12
12.47	0	0	0		-0.13
12.46	0	0	0		-0.14
12.45	0	0	0		-0.15
12.44	0	0	0		-0.16
12.43	0	0	0		-0.17
12.42	0	0	0		-0.18
12.41	0	0	0		-0.19
12.4	0	0	0		-0.2
12.39	0	0	0		-0.21
12.38	0	0	0		-0.22
12.37	0	0	0		-0.23
12.36	0	0	0		-0.24
12.35	0	0	0		-0.25
12.34	0	0	0		-0.26
12.33	0	0	0		-0.27
12.32	0	0	0		-0.28
12.31	0	0	0		-0.29
12.3	0	0	0		-0.3
12.29	0	0	0		-0.31
12.28	210	2578.8	0.0519159		-0.32
	4045	12.5999
