# Supplementary material for: Interaction Wave Functions and Interaction-Based Coherence and Entanglement in Complex Adaptive Systems
Source: Research Square preprint supplement (doi:10.21203/rs.3.rs-6846233/v1), 2025-06-16
Supplement: Supplementary file 685 [file 30623-27.xls]

## Sheet: Sheet1
0.32	10					10	3.2	0.000422476
0.31	0					0	0	0
0.3	0					0	0	0
0.29	0					0	0	0
0.28	0					0	0	0
0.27	0					0	0	0
0.26	0					0	0	0
0.25	0					0	0	0
0.24	0					0	0	0
0.23	0					0	0	0
0.22	0					0	0	0
0.21	0					0	0	0
0.2	0					0	0	0
0.19	0					0	0	0
0.18	0		113		60	173	31.14	0.00730883
0.17	0		79		0	79	13.43	0.00333756
0.16	0		18	404	79	501	80.16	0.021166
0.15	0		47	4	0	51	7.65	0.00215463
0.14	0		0	0	53	53	7.42	0.00223912
0.13	0	79	26	0	0	105	13.65	0.00443599
0.12	0	0	0	7	0	7	0.84	0.000295733
0.11	0	0	0	104	0	104	11.44	0.00439375
0.1	0	0	152	0	0	152	15.2	0.00642163
0.09	0	0	80	0	1468	1548	139.32	0.0653992
0.08	0	0	71	20	157	248	19.84	0.0104774
0.07	40	0	132	12	866	1050	73.5	0.0443599
0.06	4	241	76	396	135	852	51.12	0.0359949
0.05	0	49	136	144	596	925	46.25	0.039079
0.04	50	76	24	823	1793	2766	110.64	0.116857
0.03	144	577	437	620	962	2740	82.2	0.115758
0.02	409	198	228	82	30	947	18.94	0.0400084
0.01	800	1151	255	457	0	2663	26.63	0.112505
-1.42247e-16	350	210	551	228	0	1339	-1.90469e-13	0.0565695
-0.01	888	641	374	114	113	2130	-21.3	0.0899873
-0.02	218	284	187	18	0	707	-14.14	0.029869
-0.03	20	0	16	0	0	36	-1.08	0.00152091
-0.04	88	395	0	620	0	1103	-44.12	0.0465991
-0.05		9	42	11	5	67	-3.35	0.00283059
-0.06		128	0	33	23	184	-11.04	0.00777355
-0.07		332	0	0	15	347	-24.29	0.0146599
-0.08		0	0	0	291	291	-23.28	0.012294
-0.09		91	14	114	1227	1446	-130.14	0.06109
-0.1		0		45	165	210	-21	0.00887199
-0.11		16		2		18	-1.98	0.000760456
-0.12		56		25		81	-9.72	0.00342205
-0.13				4		4	-0.52	0.00016899
-0.14				98		98	-13.72	0.00414026
-0.15				0		0	0	0
-0.16				102		102	-16.32	0.00430925
-0.17				4		4	-0.68	0.00016899
-0.18				12		12	-2.16	0.000506971
-0.19				6		6	-1.14	0.000253485
-0.2				238		238	-47.6	0.0100549
-0.21				97		97	-20.37	0.00409801
-0.22				13		13	-2.86	0.000549218
-0.23				136		136	-31.28	0.00574567
-0.24				27		27	-6.48	0.00114068
						23670	0.0128433
