# Supplementary material for: Interaction Wave Functions and Interaction-Based Coherence and Entanglement in Complex Adaptive Systems
Source: Research Square preprint supplement (doi:10.21203/rs.3.rs-6846233/v1), 2025-06-16
Supplement: Supplementary file 686 [file 30623.xls]

## Sheet: Sheet1
12.88	10	128.8	0.00331016		0.32
12.87	0	0	0		0.31
12.86	0	0	0		0.3
12.85	0	0	0		0.29
12.84	0	0	0		0.28
12.83	0	0	0		0.27
12.82	0	0	0		0.26
12.81	0	0	0		0.25
12.8	0	0	0		0.24
12.79	0	0	0		0.23
12.78	0	0	0		0.22
12.77	0	0	0		0.21
12.76	0	0	0		0.2
12.75	0	0	0		0.19
12.74	0	0	0		0.18
12.73	0	0	0		0.17
12.72	0	0	0		0.16
12.71	0	0	0		0.15
12.7	0	0	0		0.14
12.69	0	0	0		0.13
12.68	0	0	0		0.12
12.67	0	0	0		0.11
12.66	0	0	0		0.1
12.65	0	0	0		0.09
12.64	0	0	0		0.08
12.63	40	505.2	0.0132406		0.07
12.62	4	50.48	0.00132406		0.06
12.61	0	0	0		0.05
12.6	50	630	0.0165508		0.04
12.59	144	1812.96	0.0476663		0.03
12.58	409	5145.22	0.135386		0.02
12.57	800	10056	0.264813		0.01
12.56	350	4396	0.115856		0
12.55	888	11144.4	0.293942		-0.01
12.54	218	2733.72	0.0721615		-0.02
12.53	20	250.6	0.00662032		-0.03
12.52	88	1101.76	0.0291294		-0.04
	3021	12.5638
