# Supplementary material for: Interaction Wave Functions and Interaction-Based Coherence and Entanglement in Complex Adaptive Systems
Source: Research Square preprint supplement (doi:10.21203/rs.3.rs-6846233/v1), 2025-06-16
Supplement: Supplementary file 687 [file 30624.xls]

## Sheet: Sheet1
12.7	79	1003.3	0.0174278		0.13
12.69	0	0	0		0.12
12.68	0	0	0		0.11
12.67	0	0	0		0.1
12.66	0	0	0		0.09
12.65	0	0	0		0.08
12.64	0	0	0		0.07
12.63	241	3043.83	0.0531657		0.06
12.62	49	618.38	0.0108096		0.05
12.61	76	958.36	0.0167659		0.04
12.6	577	7270.2	0.127289		0.03
12.59	198	2492.82	0.0436797		0.02
12.58	1151	14479.6	0.253916		0.01
12.57	210	2639.7	0.0463269		0
12.56	641	8050.96	0.141407		-0.01
12.55	284	3564.2	0.0626517		-0.02
12.54	0	0	0		-0.03
12.53	395	4949.35	0.0871388		-0.04
12.52	9	112.68	0.00198544		-0.05
12.51	128	1601.28	0.0282374		-0.06
12.5	332	4150	0.0732407		-0.07
12.49	0	0	0		-0.08
12.48	91	1135.68	0.020075		-0.09
12.47	0	0	0		-0.1
12.46	16	199.36	0.00352967		-0.11
12.45	56	697.2	0.0123538		-0.12
	4533	12.5671
