# Supplementary material for: Interaction Wave Functions and Interaction-Based Coherence and Entanglement in Complex Adaptive Systems
Source: Research Square preprint supplement (doi:10.21203/rs.3.rs-6846233/v1), 2025-06-16
Supplement: Supplementary file 688 [file 30625.xls]

## Sheet: Sheet1
12.68	113	1432.84	0.0369523		0.15
12.67	79	1000.93	0.0258339		0.14
12.66	18	227.88	0.0058862		0.13
12.65	47	594.55	0.0153695		0.12
12.64	0	0	0		0.11
12.63	26	328.38	0.00850229		0.1
12.62	0	0	0		0.09
12.61	0	0	0		0.08
12.6	152	1915.2	0.0497057		0.07
12.59	80	1007.2	0.0261609		0.06
12.58	71	893.18	0.0232178		0.05
12.57	132	1659.24	0.0431655		0.04
12.56	76	954.56	0.0248528		0.03
12.55	136	1706.8	0.0444735		0.02
12.54	24	300.96	0.00784827		0.01
12.53	437	5475.61	0.142904		0
12.52	228	2854.56	0.0745585		-0.01
12.51	255	3190.05	0.0833878		-0.02
12.5	551	6887.5	0.180183		-0.03
12.49	374	4671.26	0.122302		-0.04
12.48	187	2333.76	0.0611511		-0.05
12.47	16	199.52	0.00523218		-0.06
12.46	0	0	0		-0.07
12.45	42	522.9	0.0137345		-0.08
12.44	0	0	0		-0.09
12.43	0	0	0		-0.1
12.42	0	0	0		-0.11
12.41	14	173.74	0.00457816		-0.12
	3058	12.5345
