# Supplementary material for: Interaction Wave Functions and Interaction-Based Coherence and Entanglement in Complex Adaptive Systems
Source: Research Square preprint supplement (doi:10.21203/rs.3.rs-6846233/v1), 2025-06-16
Supplement: Supplementary file 689 [file 30626.xls]

## Sheet: Sheet1
12.8	404	5171.2	0.0804781		0.16
12.79	4	51.16	0.000796813		0.15
12.78	0	0	0		0.14
12.77	0	0	0		0.13
12.76	7	89.32	0.00139442		0.12
12.75	104	1326	0.0207171		0.11
12.74	0	0	0		0.1
12.73	0	0	0		0.09
12.72	20	254.4	0.00398406		0.08
12.71	12	152.52	0.00239044		0.07
12.7	396	5029.2	0.0788845		0.06
12.69	144	1827.36	0.0286853		0.05
12.68	823	10435.6	0.163944		0.04
12.67	620	7855.4	0.123506		0.03
12.66	82	1038.12	0.0163347		0.02
12.65	457	5781.05	0.0910359		0.01
12.64	228	2881.92	0.0454183		0
12.63	114	1439.82	0.0227092		-0.01
12.62	18	227.16	0.00358566		-0.02
12.61	0	0	0		-0.03
12.6	620	7812	0.123506		-0.04
12.59	11	138.49	0.00219124		-0.05
12.58	33	415.14	0.00657371		-0.06
12.57	0	0	0		-0.07
12.56	0	0	0		-0.08
12.55	114	1430.7	0.0227092		-0.09
12.54	45	564.3	0.00896414		-0.1
12.53	2	25.06	0.000398406		-0.11
12.52	25	313	0.00498008		-0.12
12.51	4	50.04	0.000796813		-0.13
12.5	98	1225	0.0195219		-0.14
12.49	0	0	0		-0.15
12.48	102	1272.96	0.0203187		-0.16
12.47	4	49.88	0.000796813		-0.17
12.46	12	149.52	0.00239044		-0.18
12.45	6	74.7	0.00119522		-0.19
12.44	238	2960.72	0.0474104		-0.2
12.43	97	1205.71	0.0193227		-0.21
12.42	13	161.46	0.00258964		-0.22
12.41	136	1687.76	0.0270916		-0.23
12.4	27	334.8	0.00537849		-0.24
	5020	12.6358
