# Supplementary material for: Interaction Wave Functions and Interaction-Based Coherence and Entanglement in Complex Adaptive Systems
Source: Research Square preprint supplement (doi:10.21203/rs.3.rs-6846233/v1), 2025-06-16
Supplement: Supplementary file 690 [file 30627.xls]

## Sheet: Sheet1
12.79	60	767.4	0.00746454		0.15
12.78	0	0	0		0.14
12.77	79	1008.83	0.00982832		0.13
12.76	0	0	0		0.12
12.75	53	675.75	0.00659368		0.11
12.74	0	0	0		0.1
12.73	0	0	0		0.09
12.72	0	0	0		0.08
12.71	0	0	0		0.07
12.7	1468	18643.6	0.182632		0.06
12.69	157	1992.33	0.0195322		0.05
12.68	866	10980.9	0.107738		0.04
12.67	135	1710.45	0.0167952		0.03
12.66	596	7545.36	0.0741478		0.02
12.65	1793	22681.5	0.223065		0.01
12.64	962	12159.7	0.119682		0
12.63	30	378.9	0.00373227		-0.01
12.62	0	0	0		-0.02
12.61	0	0	0		-0.03
12.6	113	1423.8	0.0140582		-0.04
12.59	0	0	0		-0.05
12.58	0	0	0		-0.06
12.57	0	0	0		-0.07
12.56	5	62.8	0.000622045		-0.08
12.55	23	288.65	0.00286141		-0.09
12.54	15	188.1	0.00186614		-0.1
12.53	291	3646.23	0.036203		-0.11
12.52	1227	15362	0.15265		-0.12
12.51	165	2064.15	0.0205275		-0.13
	8038	12.6375
