# Supplementary material for: Interaction Wave Functions and Interaction-Based Coherence and Entanglement in Complex Adaptive Systems
Source: Research Square preprint supplement (doi:10.21203/rs.3.rs-6846233/v1), 2025-06-16
Supplement: Supplementary file 691 [file 30630.xls]

## Sheet: Sheet1
12.72	27	343.44	0.00287356
12.71	29	368.59	0.00308642
12.7	291	3695.7	0.0309706
12.69	35	444.15	0.00372499
12.68	200	2536	0.0212857
12.67	97	1228.99	0.0103235
12.66	0	0	0
12.65	37	468.05	0.00393785
12.64	0	0	0
12.63	0	0	0
12.62	35	441.7	0.00372499
12.61	173	2181.53	0.0184121
12.6	572	7207.2	0.060877
12.59	188	2366.92	0.0200085
12.58	266	3346.28	0.0283099
12.57	174	2187.18	0.0185185
12.56	301	3780.56	0.0320349
12.55	48	602.4	0.00510856
12.54	200	2508	0.0212857
12.53	262	3282.86	0.0278842
12.52	21	262.92	0.00223499
12.51	100	1251	0.0106428
12.5	447	5587.5	0.0475734
12.49	147	1836.03	0.015645
12.48	45	561.6	0.00478927
12.47	26	324.22	0.00276713
12.46	261	3252.06	0.0277778
12.45	362	4506.9	0.038527
12.44	172	2139.68	0.0183057
12.43	492	6115.56	0.0523627
12.42	414	5141.88	0.0440613
12.41	78	967.98	0.0083014
12.4	1675	20770	0.178267
12.39	557	6901.23	0.0592805
12.38	166	2055.08	0.0176671
12.37	438	5418.06	0.0466156
12.36	170	2101.2	0.0180928
12.35	45	555.75	0.00478927
12.34	0	0	0
12.33	0	0	0
12.32	67	825.44	0.00713069
12.31	157	1932.67	0.0167092
12.3	620	7626	0.0659855
12.29	0	0	0
12.28	0	0	0
12.27	0	0	0
12.26	0	0	0
12.25	0	0	0
12.24	1	12.24	0.000106428
	9396	12.4664
