# Supplementary material for: Interaction Wave Functions and Interaction-Based Coherence and Entanglement in Complex Adaptive Systems
Source: Research Square preprint supplement (doi:10.21203/rs.3.rs-6846233/v1), 2025-06-16
Supplement: Supplementary file 692 [file 30602-06.xls]

## Sheet: Sheet1
0.26					4	4	1.04	0.000100873
0.25					47	47	11.75	0.00118525
0.24					30	30	7.2	0.000756544
0.23				10	0	10	2.3	0.000252181
0.22				0	50	50	11	0.00126091
0.21				0	0	0	0	0
0.2				0	0	0	0	0
0.19		99		111	13	223	42.37	0.00562364
0.18		0		582	0	582	104.76	0.014677
0.17		563		103	87	753	128.01	0.0189893
0.16		485	29	621	50	1185	189.6	0.0298835
0.15	111	51	114	10	96	382	57.3	0.00963333
0.14	62	92	48	99	32	333	46.62	0.00839764
0.13	0	93	0	85	68	246	31.98	0.00620366
0.12	905	658	380	0	26	1969	236.28	0.0496545
0.11	642	254	204	0	22	1122	123.42	0.0282947
0.1	321	525	562	78	43	1529	152.9	0.0385585
0.09	165	70	151	51	2	439	39.51	0.0110708
0.08	53	44	153	367	10	627	50.16	0.0158118
0.07	276	357	303	207	636	1779	124.53	0.0448631
0.06	182	64	19	248	287	800	48	0.0201745
0.05	150	139	319	30	122	760	38	0.0191658
0.04	21	395	11	138	340	905	36.2	0.0228224
0.03	296	91	56	326	124	893	26.79	0.0225198
0.02	1133	954	441	181	452	3161	63.22	0.0797145
0.01	109	40	230	104	83	566	5.66	0.0142735
-8.67362e-17	810	101	238	52	34	1235	-1.07119e-13	0.0311444
-0.01	401	107	194	230	65	997	-9.97	0.0251425
-0.02	283	276	325	617	22	1523	-30.46	0.0384072
-0.03	751	696	168	170	585	2370	-71.1	0.059767
-0.04	228	174	341	223	87	1053	-42.12	0.0265547
-0.05	475	268	185	187	716	1831	-91.55	0.0461744
-0.06	476	299	348	435	320	1878	-112.68	0.0473597
-0.07	224	108	150	132	346	960	-67.2	0.0242094
-0.08	803	449	620	34	471	2377	-190.16	0.0599435
-0.09	131	41	93	68	106	439	-39.51	0.0110708
-0.1	122	130	351	76	310	989	-98.9	0.0249407
-0.11	62	864	0	0	20	946	-104.06	0.0238564
-0.12	129	245	13	536	19	942	-113.04	0.0237555
-0.13	289	172	172	245	20	898	-116.74	0.0226459
-0.14	0	73	46	336		455	-63.7	0.0114743
-0.15	34	287	235	128		684	-102.6	0.0172492
-0.16	24	408	22	119		573	-91.68	0.01445
-0.17	117	564		108		789	-134.13	0.0198971
-0.18	92	61		0		153	-27.54	0.00385837
-0.19				20		20	-3.8	0.000504363
-0.2				65		65	-13	0.00163918
-0.21				82		82	-17.22	0.00206789
						39654	0.000944167
