# Supplementary material for: Interaction Wave Functions and Interaction-Based Coherence and Entanglement in Complex Adaptive Systems
Source: Research Square preprint supplement (doi:10.21203/rs.3.rs-6846233/v1), 2025-06-16
Supplement: Supplementary file 693 [file 30602.xls]

## Sheet: Sheet1
11.03	111	1224.33	0.0112382		0.15
11.02	62	683.24	0.00627721		0.14
11.01	0	0	0		0.13
11	905	9955	0.091627		0.12
10.99	642	7055.58	0.0649995		0.11
10.98	321	3524.58	0.0324997		0.1
10.97	165	1810.05	0.0167055		0.09
10.96	53	580.88	0.005366		0.08
10.95	276	3022.2	0.0279437		0.07
10.94	182	1991.08	0.0184266		0.06
10.93	150	1639.5	0.0151868		0.05
10.92	21	229.32	0.00212615		0.04
10.91	296	3229.36	0.0299686		0.03
10.9	1133	12349.7	0.114711		0.02
10.89	109	1187.01	0.0110357		0.01
10.88	810	8812.8	0.0820087		0
10.87	401	4358.87	0.0405994		-0.01
10.86	283	3073.38	0.0286524		-0.02
10.85	751	8148.35	0.0760352		-0.03
10.84	228	2471.52	0.0230839		-0.04
10.83	475	5144.25	0.0480915		-0.05
10.82	476	5150.32	0.0481928		-0.06
10.81	224	2421.44	0.022679		-0.07
10.8	803	8672.4	0.0813		-0.08
10.79	131	1413.49	0.0132631		-0.09
10.78	122	1315.16	0.0123519		-0.1
10.77	62	667.74	0.00627721		-0.11
10.76	129	1388.04	0.0130606		-0.12
10.75	289	3106.75	0.0292599		-0.13
10.74	0	0	0		-0.14
10.73	34	364.82	0.00344234		-0.15
10.72	24	257.28	0.00242989		-0.16
10.71	117	1253.07	0.0118457		-0.17
10.7	92	984.4	0.00931457		-0.18
	9877	10.8824
