# Supplementary material for: Interaction Wave Functions and Interaction-Based Coherence and Entanglement in Complex Adaptive Systems
Source: Research Square preprint supplement (doi:10.21203/rs.3.rs-6846233/v1), 2025-06-16
Supplement: Supplementary file 694 [file 30603.xls]

## Sheet: Sheet1
10.97	99	1086.03	0.00961445		0.19
10.96	0	0	0		0.18
10.95	563	6164.85	0.0546761		0.17
10.94	485	5305.9	0.0471011		0.16
10.93	51	557.43	0.0049529		0.15
10.92	92	1004.64	0.00893464		0.14
10.91	93	1014.63	0.00903176		0.13
10.9	658	7172.2	0.0639021		0.12
10.89	254	2766.06	0.0246674		0.11
10.88	525	5712	0.0509857		0.1
10.87	70	760.9	0.0067981		0.09
10.86	44	477.84	0.00427309		0.08
10.85	357	3873.45	0.0346703		0.07
10.84	64	693.76	0.0062154		0.06
10.83	139	1505.37	0.0134991		0.05
10.82	395	4273.9	0.0383607		0.04
10.81	91	983.71	0.00883753		0.03
10.8	954	10303.2	0.0926483		0.02
10.79	40	431.6	0.00388463		0.01
10.78	101	1088.78	0.00980868		0
10.77	107	1152.39	0.0103914		-0.01
10.76	276	2969.76	0.0268039		-0.02
10.75	696	7482	0.0675925		-0.03
10.74	174	1868.76	0.0168981		-0.04
10.73	268	2875.64	0.026027		-0.05
10.72	299	3205.28	0.0290376		-0.06
10.71	108	1156.68	0.0104885		-0.07
10.7	449	4804.3	0.0436049		-0.08
10.69	41	438.29	0.00398174		-0.09
10.68	130	1388.4	0.012625		-0.1
10.67	864	9218.88	0.0839079		-0.11
10.66	245	2611.7	0.0237933		-0.12
10.65	172	1831.8	0.0167039		-0.13
10.64	73	776.72	0.00708944		-0.14
10.63	287	3050.81	0.0278722		-0.15
10.62	408	4332.96	0.0396232		-0.16
10.61	564	5984.04	0.0547732		-0.17
10.6	61	646.6	0.00592406		-0.18
	10297	10.777
