# Supplementary material for: Interaction Wave Functions and Interaction-Based Coherence and Entanglement in Complex Adaptive Systems
Source: Research Square preprint supplement (doi:10.21203/rs.3.rs-6846233/v1), 2025-06-16
Supplement: Supplementary file 695 [file 30604.xls]

## Sheet: Sheet1
10.94	29	317.26	0.00444717		0.16
10.93	114	1246.02	0.017482		0.15
10.92	48	524.16	0.00736083		0.14
10.91	0	0	0		0.13
10.9	380	4142	0.0582733		0.12
10.89	204	2221.56	0.0312835		0.11
10.88	562	6114.56	0.0861831		0.1
10.87	151	1641.37	0.023156		0.09
10.86	153	1661.58	0.0234627		0.08
10.85	303	3287.55	0.0464653		0.07
10.84	19	205.96	0.00291366		0.06
10.83	319	3454.77	0.0489189		0.05
10.82	11	119.02	0.00168686		0.04
10.81	56	605.36	0.00858764		0.03
10.8	441	4762.8	0.0676277		0.02
10.79	230	2481.7	0.0352707		0.01
10.78	238	2565.64	0.0364975		0
10.77	194	2089.38	0.02975		-0.01
10.76	325	3497	0.049839		-0.02
10.75	168	1806	0.0257629		-0.03
10.74	341	3662.34	0.0522926		-0.04
10.73	185	1985.05	0.0283699		-0.05
10.72	348	3730.56	0.053366		-0.06
10.71	150	1606.5	0.0230026		-0.07
10.7	620	6634	0.0950774		-0.08
10.69	93	994.17	0.0142616		-0.09
10.68	351	3748.68	0.0538261		-0.1
10.67	0	0	0		-0.11
10.66	13	138.58	0.00199356		-0.12
10.65	172	1831.8	0.0263763		-0.13
10.64	46	489.44	0.00705413		-0.14
10.63	235	2498.05	0.0360374		-0.15
10.62	22	233.64	0.00337372		-0.16
	6521	10.78
