# Supplementary material for: Interaction Wave Functions and Interaction-Based Coherence and Entanglement in Complex Adaptive Systems
Source: Research Square preprint supplement (doi:10.21203/rs.3.rs-6846233/v1), 2025-06-16
Supplement: Supplementary file 696 [file 30605.xls]

## Sheet: Sheet1
10.95	10	109.5	0.00138619		0.23
10.94	0	0	0		0.22
10.93	0	0	0		0.21
10.92	0	0	0		0.2
10.91	111	1211.01	0.0153867		0.19
10.9	582	6343.8	0.0806765		0.18
10.89	103	1121.67	0.0142778		0.17
10.88	621	6756.48	0.0860826		0.16
10.87	10	108.7	0.00138619		0.15
10.86	99	1075.14	0.0137233		0.14
10.85	85	922.25	0.0117826		0.13
10.84	0	0	0		0.12
10.83	0	0	0		0.11
10.82	78	843.96	0.0108123		0.1
10.81	51	551.31	0.00706959		0.09
10.8	367	3963.6	0.0508733		0.08
10.79	207	2233.53	0.0286942		0.07
10.78	248	2673.44	0.0343776		0.06
10.77	30	323.1	0.00415858		0.05
10.76	138	1484.88	0.0191295		0.04
10.75	326	3504.5	0.0451899		0.03
10.74	181	1943.94	0.0250901		0.02
10.73	104	1115.92	0.0144164		0.01
10.72	52	557.44	0.00720821		0
10.71	230	2463.3	0.0318825		-0.01
10.7	617	6601.9	0.0855281		-0.02
10.69	170	1817.3	0.0235653		-0.03
10.68	223	2381.64	0.0309121		-0.04
10.67	187	1995.29	0.0259218		-0.05
10.66	435	4637.1	0.0602994		-0.06
10.65	132	1405.8	0.0182978		-0.07
10.64	34	361.76	0.00471306		-0.08
10.63	68	722.84	0.00942612		-0.09
10.62	76	807.12	0.0105351		-0.1
10.61	0	0	0		-0.11
10.6	536	5681.6	0.0743		-0.12
10.59	245	2594.55	0.0339617		-0.13
10.58	336	3554.88	0.0465761		-0.14
10.57	128	1352.96	0.0177433		-0.15
10.56	119	1256.64	0.0164957		-0.16
10.55	108	1139.4	0.0149709		-0.17
10.54	0	0	0		-0.18
10.53	20	210.6	0.00277239		-0.19
10.52	65	683.8	0.00901026		-0.2
10.51	82	861.82	0.0113668		-0.21
	7214	10.7256
