# Supplementary material for: Interaction Wave Functions and Interaction-Based Coherence and Entanglement in Complex Adaptive Systems
Source: Research Square preprint supplement (doi:10.21203/rs.3.rs-6846233/v1), 2025-06-16
Supplement: Supplementary file 697 [file 30606.xls]

## Sheet: Sheet1
10.79	4	43.16	0.000696258		0.26
10.78	47	506.66	0.00818103		0.25
10.77	30	323.1	0.00522193		0.24
10.76	0	0	0		0.23
10.75	50	537.5	0.00870322		0.22
10.74	0	0	0		0.21
10.73	0	0	0		0.2
10.72	13	139.36	0.00226284		0.19
10.71	0	0	0		0.18
10.7	87	930.9	0.0151436		0.17
10.69	50	534.5	0.00870322		0.16
10.68	96	1025.28	0.0167102		0.15
10.67	32	341.44	0.00557006		0.14
10.66	68	724.88	0.0118364		0.13
10.65	26	276.9	0.00452567		0.12
10.64	22	234.08	0.00382942		0.11
10.63	43	457.09	0.00748477		0.1
10.62	2	21.24	0.000348129		0.09
10.61	10	106.1	0.00174064		0.08
10.6	636	6741.6	0.110705		0.07
10.59	287	3039.33	0.0499565		0.06
10.58	122	1290.76	0.0212359		0.05
10.57	340	3593.8	0.0591819		0.04
10.56	124	1309.44	0.021584		0.03
10.55	452	4768.6	0.0786771		0.02
10.54	83	874.82	0.0144473		0.01
10.53	34	358.02	0.00591819		0
10.52	65	683.8	0.0113142		-0.01
10.51	22	231.22	0.00382942		-0.02
10.5	585	6142.5	0.101828		-0.03
10.49	87	912.63	0.0151436		-0.04
10.48	716	7503.68	0.12463		-0.05
10.47	320	3350.4	0.0557006		-0.06
10.46	346	3619.16	0.0602263		-0.07
10.45	471	4921.95	0.0819843		-0.08
10.44	106	1106.64	0.0184508		-0.09
10.43	310	3233.3	0.05396		-0.1
10.42	20	208.4	0.00348129		-0.11
10.41	19	197.79	0.00330722		-0.12
10.4	20	208	0.00348129		-0.13
	5745	10.5306
