# Supplementary material for: Interaction Wave Functions and Interaction-Based Coherence and Entanglement in Complex Adaptive Systems
Source: Research Square preprint supplement (doi:10.21203/rs.3.rs-6846233/v1), 2025-06-16
Supplement: Supplementary file 698 [file 30609-13.xls]

## Sheet: Sheet1
0.19				35		35	6.65	0.00242836
0.18				0		0	0	0
0.17	38			0		38	6.46	0.00263651
0.16	0			32		32	5.12	0.00222022
0.15	102	5		0		107	16.05	0.00742385
0.14	39	0		0		39	5.46	0.00270589
0.13	195	143		0	5	343	44.59	0.023798
0.12	31	0		0	0	31	3.72	0.00215084
0.11	242	58		0	0	300	33	0.0208145
0.1	153	0		0	0	153	15.3	0.0106154
0.09	0	10	26	58	33	127	11.43	0.00881149
0.08	18	41	0	44	44	147	11.76	0.0101991
0.07	5	32	15	20	75	147	10.29	0.0101991
0.06	83	6	149	45	69	352	21.12	0.0244224
0.05	319	160	378	15	39	911	45.55	0.0632068
0.04	5	18	147	181	123	474	18.96	0.032887
0.03	101	308	67	144	55	675	20.25	0.0468327
0.02	190	95	227	76	157	745	14.9	0.0516894
0.01	300	557	301	309	26	1493	14.93	0.103587
-3.1225e-17	587	117	663	28	159	1554	-4.85237e-14	0.107819
-0.01	108	305	84	296	362	1155	-11.55	0.080136
-0.02	68	290	118	307	121	904	-18.08	0.0627212
-0.03	223	68	118	210	193	812	-24.36	0.056338
-0.04	405	185	214	423	423	1650	-66	0.11448
-0.05	483	272	195	0		950	-47.5	0.0659127
-0.06	32	207	0	0		239	-14.34	0.0165823
-0.07	261	64	0	66		391	-27.37	0.0271283
-0.08	93	0	1			94	-7.52	0.00652189
-0.09	174	5	0			179	-16.11	0.0124193
-0.1	109		69			178	-17.8	0.01235
-0.11	0		3			3	-0.33	0.000208145
-0.12	11		0			11	-1.32	0.0007632
-0.13	20		0			20	-2.6	0.00138764
-0.14	93		0			93	-13.02	0.00645251
-0.15	20		11			31	-4.65	0.00215084
						14413	0.00228891
