# Supplementary material for: Interaction Wave Functions and Interaction-Based Coherence and Entanglement in Complex Adaptive Systems
Source: Research Square preprint supplement (doi:10.21203/rs.3.rs-6846233/v1), 2025-06-16
Supplement: Supplementary file 699 [file 30609.xls]

## Sheet: Sheet1
10.42	38	395.96	0.00842946		0.17
10.41	0	0	0		0.16
10.4	102	1060.8	0.0226264		0.15
10.39	39	405.21	0.00865129		0.14
10.38	195	2024.1	0.0432564		0.13
10.37	31	321.47	0.00687666		0.12
10.36	242	2507.12	0.0536823		0.11
10.35	153	1583.55	0.0339397		0.1
10.34	0	0	0		0.09
10.33	18	185.94	0.0039929		0.08
10.32	5	51.6	0.00110914		0.07
10.31	83	855.73	0.0184117		0.06
10.3	319	3285.7	0.0707631		0.05
10.29	5	51.45	0.00110914		0.04
10.28	101	1038.28	0.0224046		0.03
10.27	190	1951.3	0.0421473		0.02
10.26	300	3078	0.0665484		0.01
10.25	587	6016.75	0.130213		0
10.24	108	1105.92	0.0239574		-0.01
10.23	68	695.64	0.0150843		-0.02
10.22	223	2279.06	0.0494676		-0.03
10.21	405	4135.05	0.0898403		-0.04
10.2	483	4926.6	0.107143		-0.05
10.19	32	326.08	0.00709849		-0.06
10.18	261	2656.98	0.0578971		-0.07
10.17	93	945.81	0.02063		-0.08
10.16	174	1767.84	0.038598		-0.09
10.15	109	1106.35	0.0241792		-0.1
10.14	0	0	0		-0.11
10.13	11	111.43	0.00244011		-0.12
10.12	20	202.4	0.00443656		-0.13
10.11	93	940.23	0.02063		-0.14
10.1	20	202	0.00443656		-0.15
	4508	10.2516
