# Supplementary material for: Interaction Wave Functions and Interaction-Based Coherence and Entanglement in Complex Adaptive Systems
Source: Research Square preprint supplement (doi:10.21203/rs.3.rs-6846233/v1), 2025-06-16
Supplement: Supplementary file 700 [file 30610.xls]

## Sheet: Sheet1
10.32	5	51.6	0.00169722		0.15
10.31	0	0	0		0.14
10.3	143	1472.9	0.0485404		0.13
10.29	0	0	0		0.12
10.28	58	596.24	0.0196877		0.11
10.27	0	0	0		0.1
10.26	10	102.6	0.00339443		0.09
10.25	41	420.25	0.0139172		0.08
10.24	32	327.68	0.0108622		0.07
10.23	6	61.38	0.00203666		0.06
10.22	160	1635.2	0.0543109		0.05
10.21	18	183.78	0.00610998		0.04
10.2	308	3141.6	0.104549		0.03
10.19	95	968.05	0.0322471		0.02
10.18	557	5670.26	0.18907		0.01
10.17	117	1189.89	0.0397149		0
10.16	305	3098.8	0.10353		-0.01
10.15	290	2943.5	0.0984386		-0.02
10.14	68	689.52	0.0230821		-0.03
10.13	185	1874.05	0.062797		-0.04
10.12	272	2752.64	0.0923286		-0.05
10.11	207	2092.77	0.0702648		-0.06
10.1	64	646.4	0.0217244		-0.07
10.09	0	0	0		-0.08
10.08	5	50.4	0.00169722		-0.09
	2946	10.1729
