# Supplementary material for: Interaction Wave Functions and Interaction-Based Coherence and Entanglement in Complex Adaptive Systems
Source: Research Square preprint supplement (doi:10.21203/rs.3.rs-6846233/v1), 2025-06-16
Supplement: Supplementary file 701 [file 30611.xls]

## Sheet: Sheet1
10.39	26	270.14	0.00933238		0.09
10.38	0	0	0		0.08
10.37	15	155.55	0.00538406		0.07
10.36	149	1543.64	0.0534817		0.06
10.35	378	3912.3	0.135678		0.05
10.34	147	1519.98	0.0527638		0.04
10.33	67	692.11	0.0240488		0.03
10.32	227	2342.64	0.0814788		0.02
10.31	301	3103.31	0.10804		0.01
10.3	663	6828.9	0.237976		0
10.29	84	864.36	0.0301508		-0.01
10.28	118	1213.04	0.0423546		-0.02
10.27	118	1211.86	0.0423546		-0.03
10.26	214	2195.64	0.0768126		-0.04
10.25	195	1998.75	0.0699928		-0.05
10.24	0	0	0		-0.06
10.23	0	0	0		-0.07
10.22	1	10.22	0.000358938		-0.08
10.21	0	0	0		-0.09
10.2	69	703.8	0.0247667		-0.1
10.19	3	30.57	0.00107681		-0.11
10.18	0	0	0		-0.12
10.17	0	0	0		-0.13
10.16	0	0	0		-0.14
10.15	11	111.65	0.00394831		-0.15
	2786	10.3045
