# Supplementary material for: Interaction Wave Functions and Interaction-Based Coherence and Entanglement in Complex Adaptive Systems
Source: Research Square preprint supplement (doi:10.21203/rs.3.rs-6846233/v1), 2025-06-16
Supplement: Supplementary file 702 [file 30612.xls]

## Sheet: Sheet1
10.48	35	366.8	0.0152905		0.19
10.47	0	0	0		0.18
10.46	0	0	0		0.17
10.45	32	334.4	0.0139799		0.16
10.44	0	0	0		0.15
10.43	0	0	0		0.14
10.42	0	0	0		0.13
10.41	0	0	0		0.12
10.4	0	0	0		0.11
10.39	0	0	0		0.1
10.38	58	602.04	0.0253386		0.09
10.37	44	456.28	0.0192224		0.08
10.36	20	207.2	0.00873744		0.07
10.35	45	465.75	0.0196592		0.06
10.34	15	155.1	0.00655308		0.05
10.33	181	1869.73	0.0790738		0.04
10.32	144	1486.08	0.0629096		0.03
10.31	76	783.56	0.0332023		0.02
10.3	309	3182.7	0.134993		0.01
10.29	28	288.12	0.0122324		0
10.28	296	3042.88	0.129314		-0.01
10.27	307	3152.89	0.13412		-0.02
10.26	210	2154.6	0.0917431		-0.03
10.25	423	4335.75	0.184797		-0.04
10.24	0	0	0		-0.05
10.23	0	0	0		-0.06
10.22	66	674.52	0.0288336		-0.07
	2289	10.292
