# Supplementary material for: Interaction Wave Functions and Interaction-Based Coherence and Entanglement in Complex Adaptive Systems
Source: Research Square preprint supplement (doi:10.21203/rs.3.rs-6846233/v1), 2025-06-16
Supplement: Supplementary file 703 [file 30613.xls]

## Sheet: Sheet1
10.39	5	51.95	0.00265393		0.13
10.38	0	0	0		0.12
10.37	0	0	0		0.11
10.36	0	0	0		0.1
10.35	33	341.55	0.0175159		0.09
10.34	44	454.96	0.0233546		0.08
10.33	75	774.75	0.0398089		0.07
10.32	69	712.08	0.0366242		0.06
10.31	39	402.09	0.0207006		0.05
10.3	123	1266.9	0.0652866		0.04
10.29	55	565.95	0.0291932		0.03
10.28	157	1613.96	0.0833333		0.02
10.27	26	267.02	0.0138004		0.01
10.26	159	1631.34	0.0843949		0
10.25	362	3710.5	0.192144		-0.01
10.24	121	1239.04	0.0642251		-0.02
10.23	193	1974.39	0.102442		-0.03
10.22	423	4323.06	0.224522		-0.04
	1884	10.2598
