# Supplementary material for: Interaction Wave Functions and Interaction-Based Coherence and Entanglement in Complex Adaptive Systems
Source: Research Square preprint supplement (doi:10.21203/rs.3.rs-6846233/v1), 2025-06-16
Supplement: Supplementary file 704 [file 30616-20.xls]

## Sheet: Sheet1
0.24				1		1	0.24	9.15667e-05
0.23				10		10	2.3	0.000915667
0.22				0		0	0	0
0.21				0		0	0	0
0.2				0		0	0	0
0.19				0		0	0	0
0.18				0		0	0	0
0.17				60		60	10.2	0.005494
0.16				31		31	4.96	0.00283857
0.15				169	4	173	25.95	0.015841
0.14				26	10	36	5.04	0.0032964
0.13			24	2	0	26	3.38	0.00238073
0.12		2	35	24	0	61	7.32	0.00558557
0.11		0	0	0	0	0	0	0
0.1		80	4	7	0	91	9.1	0.00833257
0.09	18	209	34	31	0	292	26.28	0.0267375
0.08	12	19	6	15	0	52	4.16	0.00476147
0.07	10	84	44	22	5	165	11.55	0.0151085
0.06	25	40	51	22	331	469	28.14	0.0429448
0.05	9	81	34	179	91	394	19.7	0.0360773
0.04	411	0	35	71	68	585	23.4	0.0535665
0.03	83	0	188	0	188	459	13.77	0.0420291
0.02	157	36	41	557	80	871	17.42	0.0797546
0.01	82	28	82	56	355	603	6.03	0.0552147
-8.67362e-17	31	29	405	84	34	583	-5.05672e-14	0.0533834
-0.01	67	172	111	267	55	672	-6.72	0.0615328
-0.02	145	207	270	240	173	1035	-20.7	0.0947715
-0.03	165	213	202	688	41	1309	-39.27	0.119861
-0.04	270	128	232	441	376	1447	-57.88	0.132497
-0.05	68	66		362	19	515	-25.75	0.0471569
-0.06	16	315		278	264	873	-52.38	0.0799377
-0.07		0				0	0	0
-0.08		108				108	-8.64	0.0098892
						10921	0.000695907
