# Supplementary material for: Interaction Wave Functions and Interaction-Based Coherence and Entanglement in Complex Adaptive Systems
Source: Research Square preprint supplement (doi:10.21203/rs.3.rs-6846233/v1), 2025-06-16
Supplement: Supplementary file 705 [file 30616.xls]

## Sheet: Sheet1
10.45	18	188.1	0.0114723		0.09
10.44	12	125.28	0.00764818		0.08
10.43	10	104.3	0.00637349		0.07
10.42	25	260.5	0.0159337		0.06
10.41	9	93.69	0.00573614		0.05
10.4	411	4274.4	0.26195		0.04
10.39	83	862.37	0.0528999		0.03
10.38	157	1629.66	0.100064		0.02
10.37	82	850.34	0.0522626		0.01
10.36	31	321.16	0.0197578		0
10.35	67	693.45	0.0427024		-0.01
10.34	145	1499.3	0.0924156		-0.02
10.33	165	1704.45	0.105163		-0.03
10.32	270	2786.4	0.172084		-0.04
10.31	68	701.08	0.0433397		-0.05
10.3	16	164.8	0.0101976		-0.06
	1569	10.3628
