# Supplementary material for: Interaction Wave Functions and Interaction-Based Coherence and Entanglement in Complex Adaptive Systems
Source: Research Square preprint supplement (doi:10.21203/rs.3.rs-6846233/v1), 2025-06-16
Supplement: Supplementary file 706 [file 30617.xls]

## Sheet: Sheet1
10.4	2	20.8	0.00110072		0.12
10.39	0	0	0		0.11
10.38	80	830.4	0.0440286		0.1
10.37	209	2167.33	0.115025		0.09
10.36	19	196.84	0.0104568		0.08
10.35	84	869.4	0.04623		0.07
10.34	40	413.6	0.0220143		0.06
10.33	81	836.73	0.044579		0.05
10.32	0	0	0		0.04
10.31	0	0	0		0.03
10.3	36	370.8	0.0198129		0.02
10.29	28	288.12	0.01541		0.01
10.28	29	298.12	0.0159604		0
10.27	172	1766.44	0.0946615		-0.01
10.26	207	2123.82	0.113924		-0.02
10.25	213	2183.25	0.117226		-0.03
10.24	128	1310.72	0.0704458		-0.04
10.23	66	675.18	0.0363236		-0.05
10.22	315	3219.3	0.173363		-0.06
10.21	0	0	0		-0.07
10.2	108	1101.6	0.0594386		-0.08
	1817	10.2765
