# Supplementary material for: Interaction Wave Functions and Interaction-Based Coherence and Entanglement in Complex Adaptive Systems
Source: Research Square preprint supplement (doi:10.21203/rs.3.rs-6846233/v1), 2025-06-16
Supplement: Supplementary file 707 [file 30618.xls]

## Sheet: Sheet1
10.38	24	249.12	0.0133482		0.13
10.37	35	362.95	0.0194661		0.12
10.36	0	0	0		0.11
10.35	4	41.4	0.00222469		0.1
10.34	34	351.56	0.0189099		0.09
10.33	6	61.98	0.00333704		0.08
10.32	44	454.08	0.0244716		0.07
10.31	51	525.81	0.0283648		0.06
10.3	34	350.2	0.0189099		0.05
10.29	35	360.15	0.0194661		0.04
10.28	188	1932.64	0.104561		0.03
10.27	41	421.07	0.0228031		0.02
10.26	82	841.32	0.0456062		0.01
10.25	405	4151.25	0.22525		0
10.24	111	1136.64	0.0617353		-0.01
10.23	270	2762.1	0.150167		-0.02
10.22	202	2064.44	0.112347		-0.03
10.21	232	2368.72	0.129032		-0.04
	1798	10.2533
