# Supplementary material for: Interaction Wave Functions and Interaction-Based Coherence and Entanglement in Complex Adaptive Systems
Source: Research Square preprint supplement (doi:10.21203/rs.3.rs-6846233/v1), 2025-06-16
Supplement: Supplementary file 708 [file 30619.xls]

## Sheet: Sheet1
10.32	1	10.32	0.000274499		0.24
10.31	10	103.1	0.00274499		0.23
10.3	0	0	0		0.22
10.29	0	0	0		0.21
10.28	0	0	0		0.2
10.27	0	0	0		0.19
10.26	0	0	0		0.18
10.25	60	615	0.0164699		0.17
10.24	31	317.44	0.00850947		0.16
10.23	169	1728.87	0.0463903		0.15
10.22	26	265.72	0.00713698		0.14
10.21	2	20.42	0.000548998		0.13
10.2	24	244.8	0.00658798		0.12
10.19	0	0	0		0.11
10.18	7	71.26	0.00192149		0.1
10.17	31	315.27	0.00850947		0.09
10.16	15	152.4	0.00411749		0.08
10.15	22	223.3	0.00603898		0.07
10.14	22	223.08	0.00603898		0.06
10.13	179	1813.27	0.0491353		0.05
10.12	71	718.52	0.0194894		0.04
10.11	0	0	0		0.03
10.1	557	5625.7	0.152896		0.02
10.09	56	565.04	0.0153719		0.01
10.08	84	846.72	0.0230579		0
10.07	267	2688.69	0.0732912		-0.01
10.06	240	2414.4	0.0658798		-0.02
10.05	688	6914.4	0.188855		-0.03
10.04	441	4427.64	0.121054		-0.04
10.03	362	3630.86	0.0993687		-0.05
10.02	278	2785.56	0.0763107		-0.06
	3643	10.0801
