# Supplementary material for: Interaction Wave Functions and Interaction-Based Coherence and Entanglement in Complex Adaptive Systems
Source: Research Square preprint supplement (doi:10.21203/rs.3.rs-6846233/v1), 2025-06-16
Supplement: Supplementary file 709 [file 30620.xls]

## Sheet: Sheet1
10.19	4	40.76	0.00191022		0.15
10.18	10	101.8	0.00477555		0.14
10.17	0	0	0		0.13
10.16	0	0	0		0.12
10.15	0	0	0		0.11
10.14	0	0	0		0.1
10.13	0	0	0		0.09
10.12	0	0	0		0.08
10.11	5	50.55	0.00238777		0.07
10.1	331	3343.1	0.158071		0.06
10.09	91	918.19	0.0434575		0.05
10.08	68	685.44	0.0324737		0.04
10.07	188	1893.16	0.0897803		0.03
10.06	80	804.8	0.0382044		0.02
10.05	355	3567.75	0.169532		0.01
10.04	34	341.36	0.0162369		0
10.03	55	551.65	0.0262655		-0.01
10.02	173	1733.46	0.082617		-0.02
10.01	41	410.41	0.0195798		-0.03
10	376	3760	0.179561		-0.04
9.99	19	189.81	0.00907354		-0.05
9.98	264	2634.72	0.126074		-0.06
	2094	10.0415
