# Supplementary material for: Interaction Wave Functions and Interaction-Based Coherence and Entanglement in Complex Adaptive Systems
Source: Research Square preprint supplement (doi:10.21203/rs.3.rs-6846233/v1), 2025-06-16
Supplement: Supplementary file 710 [file 30623-27.xls]

## Sheet: Sheet1
0.36				53		53	19.08	0.00378544
0.35				0		0	0	0
0.34				230		230	78.2	0.0164274
0.33				0		0	0	0
0.32				0		0	0	0
0.31				0		0	0	0
0.3				0		0	0	0
0.29				404		404	117.16	0.0288551
0.28				77	23	100	28	0.00714235
0.27				103	0	103	27.81	0.00735662
0.26				2	0	2	0.52	0.000142847
0.25				0	0	0	0	0
0.24				40	46	86	20.64	0.00614242
0.23				0	0	0	0	0
0.22				118	0	118	25.96	0.00842797
0.21				4	19	23	4.83	0.00164274
0.2				37	0	37	7.4	0.00264267
0.19				92	11	103	19.57	0.00735662
0.18				15	0	15	2.7	0.00107135
0.17				265	0	265	45.05	0.0189272
0.16				110	34	144	23.04	0.010285
0.15				89	20	109	16.35	0.00778516
0.14				330	26	356	49.84	0.0254268
0.13				83	52	135	17.55	0.00964217
0.12				281	48	329	39.48	0.0234983
0.11				176	18	194	21.34	0.0138562
0.1				26	37	63	6.3	0.00449968
0.09	3			653	70	726	65.34	0.0518534
0.08	41		16	2	19	78	6.24	0.00557103
0.07	98		2	109	13	222	15.54	0.015856
0.06	0		26	5	195	226	13.56	0.0161417
0.05	37	100	167	71	99	474	23.7	0.0338547
0.04	190	138	112	6	296	742	29.68	0.0529962
0.03	255	180	230	0	135	800	24	0.0571388
0.02	567	98	191	0	205	1061	21.22	0.0757803
0.01	214	168	60	0	97	539	5.39	0.0384973
-1.97758e-16	314	211	128	0	0	653	-1.29136e-13	0.0466395
-0.01	250	61	104	130	49	594	-5.94	0.0424255
-0.02	112	187	4	106	0	409	-8.18	0.0292122
-0.03	182	19	11	0	0	212	-6.36	0.0151418
-0.04	19	230	78	0	157	484	-19.36	0.034569
-0.05	52	15	44	0	245	356	-17.8	0.0254268
-0.06	46	8	301	63	0	418	-25.08	0.029855
-0.07	25	43	33	30	0	131	-9.17	0.00935647
-0.08	223	2	10	0	0	235	-18.8	0.0167845
-0.09		2		0	245	247	-22.23	0.0176416
-0.1				0	33	33	-3.3	0.00235697
-0.11				87	174	261	-28.71	0.0186415
-0.12				70	94	164	-19.68	0.0117134
-0.13				27	32	59	-7.67	0.00421398
-0.14				0	117	117	-16.38	0.00835655
-0.15				0		0	0	0
-0.16				15		15	-2.4	0.00107135
-0.17				0		0	0	0
-0.18				0		0	0	0
-0.19				0		0	0	0
-0.2				0		0	0	0
-0.21				218		218	-45.78	0.0155703
-0.22				30		30	-6.6	0.0021427
-0.23				73		73	-16.79	0.00521391
-0.24				124		124	-29.76	0.00885651
-0.25				3		3	-0.75	0.00021427
-0.26				80		80	-20.8	0.00571388
-0.27				20		20	-5.4	0.00142847
-0.28				0		0	0	0
-0.29				8		8	-2.32	0.000571388
-0.3				76		76	-22.8	0.00542818
-0.31				478		478	-148.18	0.0341404
-0.32				219		219	-70.08	0.0156417
-0.33				101		101	-33.33	0.00721377
-0.34				167		167	-56.78	0.0119277
-0.35				33		33	-11.55	0.00235697
-0.36				48		48	-17.28	0.00342833
-0.37				0		0	0	0
-0.38				29		29	-11.02	0.00207128
-0.39				0		0	0	0
-0.4				0		0	0	0
-0.41				48		48	-19.68	0.00342833
-0.42				2		2	-0.84	0.000142847
-0.43				119		119	-51.17	0.00849939
						14001	-0.000462824
