# Supplementary material for: Interaction Wave Functions and Interaction-Based Coherence and Entanglement in Complex Adaptive Systems
Source: Research Square preprint supplement (doi:10.21203/rs.3.rs-6846233/v1), 2025-06-16
Supplement: Supplementary file 711 [file 30623.xls]

## Sheet: Sheet1
9.97	3	29.91	0.00114155		0.09
9.96	41	408.36	0.0156012		0.08
9.95	98	975.1	0.0372907		0.07
9.94	0	0	0		0.06
9.93	37	367.41	0.0140791		0.05
9.92	190	1884.8	0.0722983		0.04
9.91	255	2527.05	0.097032		0.03
9.9	567	5613.3	0.215753		0.02
9.89	214	2116.46	0.0814307		0.01
9.88	314	3102.32	0.119482		0
9.87	250	2467.5	0.0951294		-0.01
9.86	112	1104.32	0.042618		-0.02
9.85	182	1792.7	0.0692542		-0.03
9.84	19	186.96	0.00722983		-0.04
9.83	52	511.16	0.0197869		-0.05
9.82	46	451.72	0.0175038		-0.06
9.81	25	245.25	0.00951294		-0.07
9.8	223	2185.4	0.0848554		-0.08
	2628	9.88193
