# Supplementary material for: Interaction Wave Functions and Interaction-Based Coherence and Entanglement in Complex Adaptive Systems
Source: Research Square preprint supplement (doi:10.21203/rs.3.rs-6846233/v1), 2025-06-16
Supplement: Supplementary file 712 [file 30624.xls]

## Sheet: Sheet1
9.99	100	999	0.0683995		0.05
9.98	138	1377.24	0.0943912		0.04
9.97	180	1794.6	0.123119		0.03
9.96	98	976.08	0.0670315		0.02
9.95	168	1671.6	0.114911		0.01
9.94	211	2097.34	0.144323		0
9.93	61	605.73	0.0417237		-0.01
9.92	187	1855.04	0.127907		-0.02
9.91	19	188.29	0.0129959		-0.03
9.9	230	2277	0.157319		-0.04
9.89	15	148.35	0.0102599		-0.05
9.88	8	79.04	0.00547196		-0.06
9.87	43	424.41	0.0294118		-0.07
9.86	2	19.72	0.00136799		-0.08
9.85	2	19.7	0.00136799		-0.09
	1462	9.94059
