# Supplementary material for: Interaction Wave Functions and Interaction-Based Coherence and Entanglement in Complex Adaptive Systems
Source: Research Square preprint supplement (doi:10.21203/rs.3.rs-6846233/v1), 2025-06-16
Supplement: Supplementary file 713 [file 30625.xls]

## Sheet: Sheet1
10.04	16	160.64	0.0105471		0.08
10.03	2	20.06	0.00131839		0.07
10.02	26	260.52	0.0171391		0.06
10.01	167	1671.67	0.110086		0.05
10	112	1120	0.0738299		0.04
9.99	230	2297.7	0.151615		0.03
9.98	191	1906.18	0.125906		0.02
9.97	60	598.2	0.0395517		0.01
9.96	128	1274.88	0.0843771		0
9.95	104	1034.8	0.0685564		-0.01
9.94	4	39.76	0.00263678		-0.02
9.93	11	109.23	0.00725115		-0.03
9.92	78	773.76	0.0514173		-0.04
9.91	44	436.04	0.0290046		-0.05
9.9	301	2979.9	0.198418		-0.06
9.89	33	326.37	0.0217535		-0.07
9.88	10	98.8	0.00659196		-0.08
	1517	9.95947
