# Supplementary material for: Interaction Wave Functions and Interaction-Based Coherence and Entanglement in Complex Adaptive Systems
Source: Research Square preprint supplement (doi:10.21203/rs.3.rs-6846233/v1), 2025-06-16
Supplement: Supplementary file 714 [file 30626.xls]

## Sheet: Sheet1
10.47	53	554.91	0.00916162		0.36
10.46	0	0	0		0.35
10.45	230	2403.5	0.039758		0.34
10.44	0	0	0		0.33
10.43	0	0	0		0.32
10.42	0	0	0		0.31
10.41	0	0	0		0.3
10.4	404	4201.6	0.0698358		0.29
10.39	77	800.03	0.0133103		0.28
10.38	103	1069.14	0.0178047		0.27
10.37	2	20.74	0.000345722		0.26
10.36	0	0	0		0.25
10.35	40	414	0.00691443		0.24
10.34	0	0	0		0.23
10.33	118	1218.94	0.0203976		0.22
10.32	4	41.28	0.000691443		0.21
10.31	37	381.47	0.00639585		0.2
10.3	92	947.6	0.0159032		0.19
10.29	15	154.35	0.00259291		0.18
10.28	265	2724.2	0.0458081		0.17
10.27	110	1129.7	0.0190147		0.16
10.26	89	913.14	0.0153846		0.15
10.25	330	3382.5	0.0570441		0.14
10.24	83	849.92	0.0143475		0.13
10.23	281	2874.63	0.0485739		0.12
10.22	176	1798.72	0.0304235		0.11
10.21	26	265.46	0.00449438		0.1
10.2	653	6660.6	0.112878		0.09
10.19	2	20.38	0.000345722		0.08
10.18	109	1109.62	0.0188418		0.07
10.17	5	50.85	0.000864304		0.06
10.16	71	721.36	0.0122731		0.05
10.15	6	60.9	0.00103717		0.04
10.14	0	0	0		0.03
10.13	0	0	0		0.02
10.12	0	0	0		0.01
10.11	0	0	0		0
10.1	130	1313	0.0224719		-0.01
10.09	106	1069.54	0.0183232		-0.02
10.08	0	0	0		-0.03
10.07	0	0	0		-0.04
10.06	0	0	0		-0.05
10.05	63	633.15	0.0108902		-0.06
10.04	30	301.2	0.00518583		-0.07
10.03	0	0	0		-0.08
10.02	0	0	0		-0.09
10.01	0	0	0		-0.1
10	87	870	0.0150389		-0.11
9.99	70	699.3	0.0121003		-0.12
9.98	27	269.46	0.00466724		-0.13
9.97	0	0	0		-0.14
9.96	0	0	0		-0.15
9.95	15	149.25	0.00259291		-0.16
9.94	0	0	0		-0.17
9.93	0	0	0		-0.18
9.92	0	0	0		-0.19
9.91	0	0	0		-0.2
9.9	218	2158.2	0.0376837		-0.21
9.89	30	296.7	0.00518583		-0.22
9.88	73	721.24	0.0126188		-0.23
9.87	124	1223.88	0.0214347		-0.24
9.86	3	29.58	0.000518583		-0.25
9.85	80	788	0.0138289		-0.26
9.84	20	196.8	0.00345722		-0.27
9.83	0	0	0		-0.28
9.82	8	78.56	0.00138289		-0.29
9.81	76	745.56	0.0131374		-0.3
9.8	478	4684.4	0.0826275		-0.31
9.79	219	2144.01	0.0378565		-0.32
9.78	101	987.78	0.0174589		-0.33
9.77	167	1631.59	0.0288678		-0.34
9.76	33	322.08	0.00570441		-0.35
9.75	48	468	0.00829732		-0.36
9.74	0	0	0		-0.37
9.73	29	282.17	0.00501296		-0.38
9.72	0	0	0		-0.39
9.71	0	0	0		-0.4
9.7	48	465.6	0.00829732		-0.41
9.69	2	19.38	0.000345722		-0.42
9.68	119	1151.92	0.0205704		-0.43
	5785	10.1072
