# Supplementary material for: Interaction Wave Functions and Interaction-Based Coherence and Entanglement in Complex Adaptive Systems
Source: Research Square preprint supplement (doi:10.21203/rs.3.rs-6846233/v1), 2025-06-16
Supplement: Supplementary file 715 [file 30627.xls]

## Sheet: Sheet1
10.27	23	236.21	0.00881564		0.28
10.26	0	0	0		0.27
10.25	0	0	0		0.26
10.24	0	0	0		0.25
10.23	46	470.58	0.0176313		0.24
10.22	0	0	0		0.23
10.21	0	0	0		0.22
10.2	19	193.8	0.00728248		0.21
10.19	0	0	0		0.2
10.18	11	111.98	0.00421617		0.19
10.17	0	0	0		0.18
10.16	0	0	0		0.17
10.15	34	345.1	0.0130318		0.16
10.14	20	202.8	0.00766577		0.15
10.13	26	263.38	0.0099655		0.14
10.12	52	526.24	0.019931		0.13
10.11	48	485.28	0.0183979		0.12
10.1	18	181.8	0.0068992		0.11
10.09	37	373.33	0.0141817		0.1
10.08	70	705.6	0.0268302		0.09
10.07	19	191.33	0.00728248		0.08
10.06	13	130.78	0.00498275		0.07
10.05	195	1959.75	0.0747413		0.06
10.04	99	993.96	0.0379456		0.05
10.03	296	2968.88	0.113453		0.04
10.02	135	1352.7	0.051744		0.03
10.01	205	2052.05	0.0785742		0.02
10	97	970	0.037179		0.01
9.99	0	0	0		0
9.98	49	489.02	0.0187811		-0.01
9.97	0	0	0		-0.02
9.96	0	0	0		-0.03
9.95	157	1562.15	0.0601763		-0.04
9.94	245	2435.3	0.0939057		-0.05
9.93	0	0	0		-0.06
9.92	0	0	0		-0.07
9.91	0	0	0		-0.08
9.9	245	2425.5	0.0939057		-0.09
9.89	33	326.37	0.0126485		-0.1
9.88	174	1719.12	0.0666922		-0.11
9.87	94	927.78	0.0360291		-0.12
9.86	32	315.52	0.0122652		-0.13
9.85	117	1152.45	0.0448448		-0.14
	2609	9.99186
