# Supplementary material for: Interaction Wave Functions and Interaction-Based Coherence and Entanglement in Complex Adaptive Systems
Source: Research Square preprint supplement (doi:10.21203/rs.3.rs-6846233/v1), 2025-06-16
Supplement: Supplementary file 716 [file 30630.xls]

## Sheet: Sheet1
10.09	28	282.52	0.0120275		0.18
10.08	17	171.36	0.00730241		0.17
10.07	10	100.7	0.00429553		0.16
10.06	76	764.56	0.032646		0.15
10.05	99	994.95	0.0425258		0.14
10.04	60	602.4	0.0257732		0.13
10.03	172	1725.16	0.0738832		0.12
10.02	52	521.04	0.0223368		0.11
10.01	39	390.39	0.0167526		0.1
10	148	1480	0.0635739		0.09
9.99	153	1528.47	0.0657216		0.08
9.98	5	49.9	0.00214777		0.07
9.97	0	0	0		0.06
9.96	5	49.8	0.00214777		0.05
9.95	53	527.35	0.0227663		0.04
9.94	0	0	0		0.03
9.93	5	49.65	0.00214777		0.02
9.92	0	0	0		0.01
9.91	22	218.02	0.00945017		0
9.9	41	405.9	0.0176117		-0.01
9.89	33	326.37	0.0141753		-0.02
9.88	50	494	0.0214777		-0.03
9.87	15	148.05	0.0064433		-0.04
9.86	136	1340.96	0.0584192		-0.05
9.85	229	2255.65	0.0983677		-0.06
9.84	150	1476	0.064433		-0.07
9.83	2	19.66	0.000859107		-0.08
9.82	140	1374.8	0.0601375		-0.09
9.81	214	2099.34	0.0919244		-0.1
9.8	374	3665.2	0.160653		-0.11
	2328	9.90644
