# Supplementary material for: Interaction Wave Functions and Interaction-Based Coherence and Entanglement in Complex Adaptive Systems
Source: Research Square preprint supplement (doi:10.21203/rs.3.rs-6846233/v1), 2025-06-16
Supplement: Supplementary file 717 [file 30602-06.xls]

## Sheet: Sheet1
0.1	45		87			132	13.2	0.00750981
0.09	0		90			90	8.1	0.00512033
0.08	128		197	21		346	27.68	0.0196848
0.07	0	30	25	10		65	4.55	0.00369801
0.06	14	0	119	0		133	7.98	0.00756671
0.05	35	143	19	21	21	239	11.95	0.0135973
0.04	78	1150	70	50	0	1348	53.92	0.0766911
0.03	127	512	77	354	0	1070	32.1	0.060875
0.02	120	236	74	207	44	681	13.62	0.0387438
0.01	71	396	100	301	140	1008	10.08	0.0573477
0	1675	1509	347	320	1431	5282	0	0.300506
-0.01	644	488	576	148	106	1962	-19.62	0.111623
-0.02	779	790	1397	171	318	3455	-69.1	0.196564
-0.03	0	238	278	20	83	619	-18.57	0.0352165
-0.04	50	82	10	333	0	475	-19	0.027024
-0.05		286		100	98	484	-24.2	0.027536
-0.06		175			5	180	-10.8	0.0102407
-0.07		8				8	-0.56	0.00045514
						17577	0.00121352
