# Supplementary material for: Interaction Wave Functions and Interaction-Based Coherence and Entanglement in Complex Adaptive Systems
Source: Research Square preprint supplement (doi:10.21203/rs.3.rs-6846233/v1), 2025-06-16
Supplement: Supplementary file 718 [file 30602.xls]

## Sheet: Sheet1
10.1	45	454.5	0.011949		0.1
10.09	0	0	0		0.09
10.08	128	1290.24	0.0339883		0.08
10.07	0	0	0		0.07
10.06	14	140.84	0.00371747		0.06
10.05	35	351.75	0.00929368		0.05
10.04	78	783.12	0.0207116		0.04
10.03	127	1273.81	0.0337228		0.03
10.02	120	1202.4	0.031864		0.02
10.01	71	710.71	0.0188529		0.01
10	1675	16750	0.444769		0
9.99	644	6433.56	0.171004		-0.01
9.98	779	7774.42	0.206851		-0.02
9.97	0	0	0		-0.03
9.96	50	498	0.0132767		-0.04
	3766	10.0009
