# Supplementary material for: Interaction Wave Functions and Interaction-Based Coherence and Entanglement in Complex Adaptive Systems
Source: Research Square preprint supplement (doi:10.21203/rs.3.rs-6846233/v1), 2025-06-16
Supplement: Supplementary file 719 [file 30603.xls]

## Sheet: Sheet1
10.17	30	305.1	0.00496442		0.07
10.16	0	0	0		0.06
10.15	143	1451.45	0.0236637		0.05
10.14	1150	11661	0.190303		0.04
10.13	512	5186.56	0.0847261		0.03
10.12	236	2388.32	0.0390535		0.02
10.11	396	4003.56	0.0655304		0.01
10.1	1509	15240.9	0.24971		0
10.09	488	4923.92	0.0807546		-0.01
10.08	790	7963.2	0.13073		-0.02
10.07	238	2396.66	0.0393844		-0.03
10.06	82	824.92	0.0135694		-0.04
10.05	286	2874.3	0.0473275		-0.05
10.04	175	1757	0.0289591		-0.06
10.03	8	80.24	0.00132385		-0.07
	6043	10.1038
