# Supplementary material for: Interaction Wave Functions and Interaction-Based Coherence and Entanglement in Complex Adaptive Systems
Source: Research Square preprint supplement (doi:10.21203/rs.3.rs-6846233/v1), 2025-06-16
Supplement: Supplementary file 720 [file 30604.xls]

## Sheet: Sheet1
10.1	87	878.7	0.025101		0.1
10.09	90	908.1	0.0259665		0.09
10.08	197	1985.76	0.0568379		0.08
10.07	25	251.75	0.00721293		0.07
10.06	119	1197.14	0.0343335		0.06
10.05	19	190.95	0.00548182		0.05
10.04	70	702.8	0.0201962		0.04
10.03	77	772.31	0.0222158		0.03
10.02	74	741.48	0.0213503		0.02
10.01	100	1001	0.0288517		0.01
10	347	3470	0.100115		0
9.99	576	5754.24	0.166186		-0.01
9.98	1397	13942.1	0.403058		-0.02
9.97	278	2771.66	0.0802077		-0.03
9.96	10	99.6	0.00288517		-0.04
	3466	10.0022
