# Supplementary material for: Interaction Wave Functions and Interaction-Based Coherence and Entanglement in Complex Adaptive Systems
Source: Research Square preprint supplement (doi:10.21203/rs.3.rs-6846233/v1), 2025-06-16
Supplement: Supplementary file 721 [file 30605.xls]

## Sheet: Sheet1
10.15	21	213.15	0.010214		0.08
10.14	10	101.4	0.00486381		0.07
10.13	0	0	0		0.06
10.12	21	212.52	0.010214		0.05
10.11	50	505.5	0.0243191		0.04
10.1	354	3575.4	0.172179		0.03
10.09	207	2088.63	0.100681		0.02
10.08	301	3034.08	0.146401		0.01
10.07	320	3222.4	0.155642		0
10.06	148	1488.88	0.0719844		-0.01
10.05	171	1718.55	0.0831712		-0.02
10.04	20	200.8	0.00972763		-0.03
10.03	333	3339.99	0.161965		-0.04
10.02	100	1002	0.0486381		-0.05
	2056	10.0697
