# Supplementary material for: Interaction Wave Functions and Interaction-Based Coherence and Entanglement in Complex Adaptive Systems
Source: Research Square preprint supplement (doi:10.21203/rs.3.rs-6846233/v1), 2025-06-16
Supplement: Supplementary file 722 [file 30606.xls]

## Sheet: Sheet1
10.05	21	211.05	0.00934996		0.05
10.04	0	0	0		0.04
10.03	0	0	0		0.03
10.02	44	440.88	0.0195904		0.02
10.01	140	1401.4	0.062333		0.01
10	1431	14310	0.637133		0
9.99	106	1058.94	0.047195		-0.01
9.98	318	3173.64	0.141585		-0.02
9.97	83	827.51	0.0369546		-0.03
9.96	0	0	0		-0.04
9.95	98	975.1	0.0436331		-0.05
9.94	5	49.7	0.00222618		-0.06
	2246	9.99476
