# Supplementary material for: Interaction Wave Functions and Interaction-Based Coherence and Entanglement in Complex Adaptive Systems
Source: Research Square preprint supplement (doi:10.21203/rs.3.rs-6846233/v1), 2025-06-16
Supplement: Supplementary file 723 [file 30609-13.xls]

## Sheet: Sheet1
0.15	20					20	3	0.00193667
0.14	9					9	1.26	0.000871502
0.13	4					4	0.52	0.000387334
0.12	9					9	1.08	0.000871502
0.11	82					82	9.02	0.00794035
0.1	304		17			321	32.1	0.0310836
0.09	181		248			429	38.61	0.0415416
0.08	172		0			172	13.76	0.0166554
0.07	113		10	18		141	9.87	0.0136535
0.06	40		129	10		179	10.74	0.0173332
0.05	8	30	12	56		106	5.3	0.0102644
0.04	4	130	133	32		299	11.96	0.0289532
0.03	3	41	42	143		229	6.87	0.0221749
0.02	456	300	325	16	1074	2171	43.42	0.210226
0.01	204	521	10	155	98	988	9.88	0.0956715
0	190	223	97	87	202	799	0	0.07737
-0.01	28	387	69	132	244	860	-8.6	0.0832768
-0.02	181	157	136	215	148	837	-16.74	0.0810497
-0.03	230	140	48	141	369	928	-27.84	0.0898615
-0.04	55	124	25		30	234	-9.36	0.022659
-0.05	136	27	73		25	261	-13.05	0.0252736
-0.06	195		275			470	-28.2	0.0455118
-0.07	61		69			130	-9.1	0.0125884
-0.08	349		70			419	-33.52	0.0405733
-0.09	141		0			141	-12.69	0.0136535
-0.1	84		5			89	-8.9	0.00861819
						10327	0.00284594
