# Supplementary material for: Interaction Wave Functions and Interaction-Based Coherence and Entanglement in Complex Adaptive Systems
Source: Research Square preprint supplement (doi:10.21203/rs.3.rs-6846233/v1), 2025-06-16
Supplement: Supplementary file 724 [file 30609.xls]

## Sheet: Sheet1
9.93	20	198.6	0.00613685		0.15
9.92	9	89.28	0.00276158		0.14
9.91	4	39.64	0.00122737		0.13
9.9	9	89.1	0.00276158		0.12
9.89	82	810.98	0.0251611		0.11
9.88	304	3003.52	0.0932801		0.1
9.87	181	1786.47	0.0555385		0.09
9.86	172	1695.92	0.0527769		0.08
9.85	113	1113.05	0.0346732		0.07
9.84	40	393.6	0.0122737		0.06
9.83	8	78.64	0.00245474		0.05
9.82	4	39.28	0.00122737		0.04
9.81	3	29.43	0.000920528		0.03
9.8	456	4468.8	0.13992		0.02
9.79	204	1997.16	0.0625959		0.01
9.78	190	1858.2	0.0583001		0
9.77	28	273.56	0.00859159		-0.01
9.76	181	1766.56	0.0555385		-0.02
9.75	230	2242.5	0.0705738		-0.03
9.74	55	535.7	0.0168763		-0.04
9.73	136	1323.28	0.0417306		-0.05
9.72	195	1895.4	0.0598343		-0.06
9.71	61	592.31	0.0187174		-0.07
9.7	349	3385.3	0.107088		-0.08
9.69	141	1366.29	0.0432648		-0.09
9.68	84	813.12	0.0257748		-0.1
	3259	9.78389
