# Supplementary material for: Interaction Wave Functions and Interaction-Based Coherence and Entanglement in Complex Adaptive Systems
Source: Research Square preprint supplement (doi:10.21203/rs.3.rs-6846233/v1), 2025-06-16
Supplement: Supplementary file 725 [file 30610.xls]

## Sheet: Sheet1
9.76	30	292.8	0.0144231		0.05
9.75	130	1267.5	0.0625		0.04
9.74	41	399.34	0.0197115		0.03
9.73	300	2919	0.144231		0.02
9.72	521	5064.12	0.250481		0.01
9.71	223	2165.33	0.107212		0
9.7	387	3753.9	0.186058		-0.01
9.69	157	1521.33	0.0754808		-0.02
9.68	140	1355.2	0.0673077		-0.03
9.67	124	1199.08	0.0596154		-0.04
9.66	27	260.82	0.0129808		-0.05
	2080	9.71078
