# Supplementary material for: Interaction Wave Functions and Interaction-Based Coherence and Entanglement in Complex Adaptive Systems
Source: Research Square preprint supplement (doi:10.21203/rs.3.rs-6846233/v1), 2025-06-16
Supplement: Supplementary file 726 [file 30611.xls]

## Sheet: Sheet1
9.96	17	169.32	0.00948132		0.1
9.95	248	2467.6	0.138316		0.09
9.94	0	0	0		0.08
9.93	10	99.3	0.00557724		0.07
9.92	129	1279.68	0.0719465		0.06
9.91	12	118.92	0.00669269		0.05
9.9	133	1316.7	0.0741774		0.04
9.89	42	415.38	0.0234244		0.03
9.88	325	3211	0.18126		0.02
9.87	10	98.7	0.00557724		0.01
9.86	97	956.42	0.0540993		0
9.85	69	679.65	0.038483		-0.01
9.84	136	1338.24	0.0758505		-0.02
9.83	48	471.84	0.0267708		-0.03
9.82	25	245.5	0.0139431		-0.04
9.81	73	716.13	0.0407139		-0.05
9.8	275	2695	0.153374		-0.06
9.79	69	675.51	0.038483		-0.07
9.78	70	684.6	0.0390407		-0.08
9.77	0	0	0		-0.09
9.76	5	48.8	0.00278862		-0.1
	1793	9.86519
