# Supplementary material for: Interaction Wave Functions and Interaction-Based Coherence and Entanglement in Complex Adaptive Systems
Source: Research Square preprint supplement (doi:10.21203/rs.3.rs-6846233/v1), 2025-06-16
Supplement: Supplementary file 727 [file 30612.xls]

## Sheet: Sheet1
9.96	18	179.28	0.0179104		0.07
9.95	10	99.5	0.00995025		0.06
9.94	56	556.64	0.0557214		0.05
9.93	32	317.76	0.0318408		0.04
9.92	143	1418.56	0.142289		0.03
9.91	16	158.56	0.0159204		0.02
9.9	155	1534.5	0.154229		0.01
9.89	87	860.43	0.0865672		0
9.88	132	1304.16	0.131343		-0.01
9.87	215	2122.05	0.21393		-0.02
9.86	141	1390.26	0.140299		-0.03
	1005	9.89224
