# Supplementary material for: Interaction Wave Functions and Interaction-Based Coherence and Entanglement in Complex Adaptive Systems
Source: Research Square preprint supplement (doi:10.21203/rs.3.rs-6846233/v1), 2025-06-16
Supplement: Supplementary file 728 [file 30613.xls]

## Sheet: Sheet1
9.95	1074	10686.3	0.490411		0.02
9.94	98	974.12	0.0447489		0.01
9.93	202	2005.86	0.0922374		0
9.92	244	2420.48	0.111416		-0.01
9.91	148	1466.68	0.0675799		-0.02
9.9	369	3653.1	0.168493		-0.03
9.89	30	296.7	0.0136986		-0.04
9.88	25	247	0.0114155		-0.05
	2190	9.93162
