# Supplementary material for: Interaction Wave Functions and Interaction-Based Coherence and Entanglement in Complex Adaptive Systems
Source: Research Square preprint supplement (doi:10.21203/rs.3.rs-6846233/v1), 2025-06-16
Supplement: Supplementary file 729 [file 30616-20.xls]

## Sheet: Sheet1
0.06				203	106	309	18.54	0.0186775
0.05	97	45		0	169	311	15.55	0.0187984
0.04	124	179	18	84	2432	2837	113.48	0.171482
0.03	49	190	251	73	301	864	25.92	0.0522244
0.02	26	111	19	109	1895	2160	43.2	0.130561
0.01	116	56	195	783	2056	3206	32.06	0.193786
0	236	389	295	80	119	1119	0	0.0676378
-0.01	216	128	39	347	118	848	-8.48	0.0512573
-0.02	144	89	352	38	167	790	-15.8	0.0477515
-0.03	155	66	120	60	198	599	-17.97	0.0362065
-0.04	127	190	16	166	1942	2441	-97.64	0.147546
-0.05		54	11	73	95	233	-11.65	0.0140837
-0.06		15		153	5	173	-10.38	0.010457
-0.07		46			200	246	-17.22	0.0148694
-0.08					37	37	-2.96	0.00223646
-0.09					371	371	-33.39	0.022425
						16544	0.0020104
