# Supplementary material for: Interaction Wave Functions and Interaction-Based Coherence and Entanglement in Complex Adaptive Systems
Source: Research Square preprint supplement (doi:10.21203/rs.3.rs-6846233/v1), 2025-06-16
Supplement: Supplementary file 730 [file 30616.xls]

## Sheet: Sheet1
10	97	970	0.0751938		0.05
9.99	124	1238.76	0.096124		0.04
9.98	49	489.02	0.0379845		0.03
9.97	26	259.22	0.020155		0.02
9.96	116	1155.36	0.0899225		0.01
9.95	236	2348.2	0.182946		0
9.94	216	2147.04	0.167442		-0.01
9.93	144	1429.92	0.111628		-0.02
9.92	155	1537.6	0.120155		-0.03
9.91	127	1258.57	0.0984496		-0.04
	1290	9.9486
