# Supplementary material for: Interaction Wave Functions and Interaction-Based Coherence and Entanglement in Complex Adaptive Systems
Source: Research Square preprint supplement (doi:10.21203/rs.3.rs-6846233/v1), 2025-06-16
Supplement: Supplementary file 731 [file 30617.xls]

## Sheet: Sheet1
10	45	450	0.0288832		0.05
9.99	179	1788.21	0.114891		0.04
9.98	190	1896.2	0.121951		0.03
9.97	111	1106.67	0.0712452		0.02
9.96	56	557.76	0.0359435		0.01
9.95	389	3870.55	0.249679		0
9.94	128	1272.32	0.0821566		-0.01
9.93	89	883.77	0.0571245		-0.02
9.92	66	654.72	0.042362		-0.03
9.91	190	1882.9	0.121951		-0.04
9.9	54	534.6	0.0346598		-0.05
9.89	15	148.35	0.00962773		-0.06
9.88	46	454.48	0.029525		-0.07
	1558	9.94899
