# Supplementary material for: Interaction Wave Functions and Interaction-Based Coherence and Entanglement in Complex Adaptive Systems
Source: Research Square preprint supplement (doi:10.21203/rs.3.rs-6846233/v1), 2025-06-16
Supplement: Supplementary file 732 [file 30618.xls]

## Sheet: Sheet1
9.99	18	179.82	0.0136778		0.04
9.98	251	2504.98	0.190729		0.03
9.97	19	189.43	0.0144377		0.02
9.96	195	1942.2	0.148176		0.01
9.95	295	2935.25	0.224164		0
9.94	39	387.66	0.0296353		-0.01
9.93	352	3495.36	0.267477		-0.02
9.92	120	1190.4	0.0911854		-0.03
9.91	16	158.56	0.0121581		-0.04
9.9	11	108.9	0.00835866		-0.05
	1316	9.94875
