# Supplementary material for: Interaction Wave Functions and Interaction-Based Coherence and Entanglement in Complex Adaptive Systems
Source: Research Square preprint supplement (doi:10.21203/rs.3.rs-6846233/v1), 2025-06-16
Supplement: Supplementary file 733 [file 30619.xls]

## Sheet: Sheet1
10	203	2030	0.0935915		0.06
9.99	0	0	0		0.05
9.98	84	838.32	0.0387275		0.04
9.97	73	727.81	0.0336561		0.03
9.96	109	1085.64	0.0502536		0.02
9.95	783	7790.85	0.360996		0.01
9.94	80	795.2	0.0368834		0
9.93	347	3445.71	0.159982		-0.01
9.92	38	376.96	0.0175196		-0.02
9.91	60	594.6	0.0276625		-0.03
9.9	166	1643.4	0.076533		-0.04
9.89	73	721.97	0.0336561		-0.05
9.88	153	1511.64	0.0705394		-0.06
	2169	9.94103
