# Supplementary material for: Interaction Wave Functions and Interaction-Based Coherence and Entanglement in Complex Adaptive Systems
Source: Research Square preprint supplement (doi:10.21203/rs.3.rs-6846233/v1), 2025-06-16
Supplement: Supplementary file 734 [file 30620.xls]

## Sheet: Sheet1
10.1	106	1070.6	0.010381		0.06
10.09	169	1705.21	0.0165508		0.05
10.08	2432	24514.6	0.238175		0.04
10.07	301	3031.07	0.029478		0.03
10.06	1895	19063.7	0.185584		0.02
10.05	2056	20662.8	0.201351		0.01
10.04	119	1194.76	0.0116541		0
10.03	118	1183.54	0.0115562		-0.01
10.02	167	1673.34	0.0163549		-0.02
10.01	198	1981.98	0.0193909		-0.03
10	1942	19420	0.190187		-0.04
9.99	95	949.05	0.00930369		-0.05
9.98	5	49.9	0.000489668		-0.06
9.97	200	1994	0.0195867		-0.07
9.96	37	368.52	0.00362354		-0.08
9.95	371	3691.45	0.0363334		-0.09
	10211	10.0435
