# Supplementary material for: Interaction Wave Functions and Interaction-Based Coherence and Entanglement in Complex Adaptive Systems
Source: Research Square preprint supplement (doi:10.21203/rs.3.rs-6846233/v1), 2025-06-16
Supplement: Supplementary file 735 [file 30623-27.xls]

## Sheet: Sheet1
0.12		16				16	1.92	0.00165649
0.11		53				53	5.83	0.00548711
0.1		0				0	0	0
0.09	65	0	50			115	10.35	0.011906
0.08	61	12	0	1141		1214	97.12	0.125686
0.07	5	20	0	0		25	1.75	0.00258826
0.06	669	333	0	0		1002	60.12	0.103737
0.05	11	0	21	0		32	1.6	0.00331297
0.04	225	26	17	0		268	10.72	0.0277461
0.03	9	105	80	123		317	9.51	0.0328191
0.02	113	0	83	858		1054	21.08	0.109121
0.01	416	199	64	36		715	7.15	0.0740242
0	59	60	100	102		321	0	0.0332333
-0.01	11	44	252	152		459	-4.59	0.0475204
-0.02	23	104	15	713		855	-17.1	0.0885185
-0.03	209	60	160	146		575	-17.25	0.05953
-0.04	358	278		165		801	-32.04	0.0829278
-0.05	281	137		0		418	-20.9	0.0432757
-0.06	247	75		27		349	-20.94	0.0361321
-0.07	314	0		30		344	-24.08	0.0356145
-0.08		31		12		43	-3.44	0.00445181
-0.09				218		218	-19.62	0.0225696
-0.1				177		177	-17.7	0.0183249
-0.11				168		168	-18.48	0.0173931
-0.12				110		110	-13.2	0.0113883
-0.13				0		0	0	0
-0.14				10		10	-1.4	0.0010353
						9659	0.00169893
