# Supplementary material for: Interaction Wave Functions and Interaction-Based Coherence and Entanglement in Complex Adaptive Systems
Source: Research Square preprint supplement (doi:10.21203/rs.3.rs-6846233/v1), 2025-06-16
Supplement: Supplementary file 736 [file 30623.xls]

## Sheet: Sheet1
10.13	65	658.45	0.0211313		0.09
10.12	61	617.32	0.0198309		0.08
10.11	5	50.55	0.00162549		0.07
10.1	669	6756.9	0.21749		0.06
10.09	11	110.99	0.00357607		0.05
10.08	225	2268	0.0731469		0.04
10.07	9	90.63	0.00292588		0.03
10.06	113	1136.78	0.036736		0.02
10.05	416	4180.8	0.135241		0.01
10.04	59	592.36	0.0191808		0
10.03	11	110.33	0.00357607		-0.01
10.02	23	230.46	0.00747724		-0.02
10.01	209	2092.09	0.0679454		-0.03
10	358	3580	0.116385		-0.04
9.99	281	2807.19	0.0913524		-0.05
9.98	247	2465.06	0.0802991		-0.06
9.97	314	3130.58	0.102081		-0.07
	3076	10.0385
