# Supplementary material for: Interaction Wave Functions and Interaction-Based Coherence and Entanglement in Complex Adaptive Systems
Source: Research Square preprint supplement (doi:10.21203/rs.3.rs-6846233/v1), 2025-06-16
Supplement: Supplementary file 737 [file 30624.xls]

## Sheet: Sheet1
9.96	16	159.36	0.0103026		0.12
9.95	53	527.35	0.0341275		0.11
9.94	0	0	0		0.1
9.93	0	0	0		0.09
9.92	12	119.04	0.00772698		0.08
9.91	20	198.2	0.0128783		0.07
9.9	333	3296.7	0.214424		0.06
9.89	0	0	0		0.05
9.88	26	256.88	0.0167418		0.04
9.87	105	1036.35	0.0676111		0.03
9.86	0	0	0		0.02
9.85	199	1960.15	0.128139		0.01
9.84	60	590.4	0.0386349		0
9.83	44	432.52	0.0283323		-0.01
9.82	104	1021.28	0.0669672		-0.02
9.81	60	588.6	0.0386349		-0.03
9.8	278	2724.4	0.179008		-0.04
9.79	137	1341.23	0.0882164		-0.05
9.78	75	733.5	0.0482936		-0.06
9.77	0	0	0		-0.07
9.76	31	302.56	0.0199614		-0.08
	1553	9.84451
