# Supplementary material for: Interaction Wave Functions and Interaction-Based Coherence and Entanglement in Complex Adaptive Systems
Source: Research Square preprint supplement (doi:10.21203/rs.3.rs-6846233/v1), 2025-06-16
Supplement: Supplementary file 738 [file 30625.xls]

## Sheet: Sheet1
9.9	50	495	0.0593824		0.09
9.89	0	0	0		0.08
9.88	0	0	0		0.07
9.87	0	0	0		0.06
9.86	21	207.06	0.0249406		0.05
9.85	17	167.45	0.02019		0.04
9.84	80	787.2	0.0950119		0.03
9.83	83	815.89	0.0985748		0.02
9.82	64	628.48	0.0760095		0.01
9.81	100	981	0.118765		0
9.8	252	2469.6	0.299287		-0.01
9.79	15	146.85	0.0178147		-0.02
9.78	160	1564.8	0.190024		-0.03
	842	9.81393
