# Supplementary material for: Interaction Wave Functions and Interaction-Based Coherence and Entanglement in Complex Adaptive Systems
Source: Research Square preprint supplement (doi:10.21203/rs.3.rs-6846233/v1), 2025-06-16
Supplement: Supplementary file 739 [file 30626.xls]

## Sheet: Sheet1
9.9	1141	11295.9	0.272445		0.08
9.89	0	0	0		0.07
9.88	0	0	0		0.06
9.87	0	0	0		0.05
9.86	0	0	0		0.04
9.85	123	1211.55	0.0293696		0.03
9.84	858	8442.72	0.204871		0.02
9.83	36	353.88	0.00859599		0.01
9.82	102	1001.64	0.0243553		0
9.81	152	1491.12	0.0362942		-0.01
9.8	713	6987.4	0.170248		-0.02
9.79	146	1429.34	0.0348615		-0.03
9.78	165	1613.7	0.0393983		-0.04
9.77	0	0	0		-0.05
9.76	27	263.52	0.00644699		-0.06
9.75	30	292.5	0.00716332		-0.07
9.74	12	116.88	0.00286533		-0.08
9.73	218	2121.14	0.0520535		-0.09
9.72	177	1720.44	0.0422636		-0.1
9.71	168	1631.28	0.0401146		-0.11
9.7	110	1067	0.0262655		-0.12
9.69	0	0	0		-0.13
9.68	10	96.8	0.00238777		-0.14
	4188	9.82254
