# Supplementary material for: Interaction Wave Functions and Interaction-Based Coherence and Entanglement in Complex Adaptive Systems
Source: Research Square preprint supplement (doi:10.21203/rs.3.rs-6846233/v1), 2025-06-16
Supplement: Supplementary file 740 [file 30630.xls]

## Sheet: Sheet1
9.75	11	107.25	0.00437898
9.74	0	0	0
9.73	0	0	0
9.72	0	0	0
9.71	0	0	0
9.7	0	0	0
9.69	0	0	0
9.68	0	0	0
9.67	0	0	0
9.66	17	164.22	0.00676752
9.65	125	1206.25	0.0497611
9.64	18	173.52	0.00716561
9.63	190	1829.7	0.0756369
9.62	40	384.8	0.0159236
9.61	18	172.98	0.00716561
9.6	278	2668.8	0.110669
9.59	0	0	0
9.58	30	287.4	0.0119427
9.57	0	0	0
9.56	137	1309.72	0.0545382
9.55	310	2960.5	0.123408
9.54	8	76.32	0.00318471
9.53	94	895.82	0.0374204
9.52	22	209.44	0.00875796
9.51	92	874.92	0.0366242
9.5	213	2023.5	0.084793
9.49	14	132.86	0.00557325
9.48	92	872.16	0.0366242
9.47	105	994.35	0.0417994
9.46	341	3225.86	0.135748
9.45	221	2088.45	0.0879777
9.44	55	519.2	0.0218949
9.43	19	179.17	0.00756369
9.42	3	28.26	0.00119427
9.41	59	555.19	0.0234873
	2512	9.53051
